# Supplementary material for: Genetic Architecture of Ethanol-Responsive Transcriptome Variation in Saccharomyces cerevisiae Strains
Source: Oxford University Press journal article supplement (doi:10.1534/genetics.114.167429), 2014-06-26
Supplement: genetics.114.167429-1.xls [file genetics.114.167429-1.xls]

## Sheet: Parental_mclustVIIG100
UID	NAME	Original Cluster Name	Collapsed Cluster Name	DBY_1	DBY_2	DBY_3	DBY_4	DBY_5	DBY_6	M22_1	M22_2	M22_3	M22_4	M22_5	M22_6	YPS_1	YPS_2	YPS_3	YPS_4	YPS_5	YPS_6
YKR055W	2 - YKR055W ... RHO4 actin filament organization* GTPase activity* intracellular | YKR056W	2	1	-0.03091	0.20666	0.14017	0.32086	-0.14001	-0.18956	0.47853	0.589715	0.339065	0.516345	0.33714	0.368075	-0.499955	-0.492635	-0.127705	-0.108835	-0.36217	-0.39108
YIL083C	2 - YIL083C ˜ CAB2 coenzyme A biosynthesis phosphopantothenate-cysteine l | Probable phosphopantothenoylcysteine synthetase (PPCS), which catalyzes the second step of coenzyme A biosynthesis from pantothenate; null mutant lethality is complemented by E. coli coaBC (encoding a bifunctional enzyme with PPCS activity)YIL084C	2	1	-0.05607	0.1006	0.00582	0.10096	-0.10942	0.15343	0.17726	1.03148	0.216155	0.359425	0.06803	0.460295	-0.256685	0.071385	-0.219675	0.032415	-0.12376	-0.08226
YAL022C	2 - YAL022C ... FUN26 nucleoside transport nucleoside transporter activity membrane* | YAL023C	2	1	0.16965	0.23468	0.1111	0.19612	0.27688	-0.13206	0.45421	0.453355	0.640435	0.256105	0.51327	0.377015	-0.132435	-0.066075	-0.013765	0.094555	0.11127	0.32982
YER019W	2 - YER019W ... ISC1 response to salt stress* phospholipase C activity mitochondrion* | YER020W	2	1	0.27442	0.31766	0.16559	0.35393	0.39379	-0.13235	0.64371	0.382175	0.674175	0.194395	0.66341	0.240075	0.001675	-0.292275	-0.048335	-0.037505	0.079	0.12548
YLL049W	2 - YLL049W ˜ LDB18 biological process unknown molecular function unknown | Protein of unknown function; required for nuclear migration; null mutant shows a reduced affinity for the alcian blue dye suggesting a decreased net negative charge of the cell surfaceYLL050C	2	1	0.0587	0.06068	0.27714	0.2254	0.28227	0.06068	0.44942	0.172245	0.535435	0.210295	0.44116	0.213815	-0.052625	-0.023185	0.053675	0.028215	-0.06334	-0.00134
YDR422C	2 - YDR422C ... SIP1 protein amino acid phosphoryla AMP-activated protein kinase activivacuole | YDR423C	2	1	0.17723	0.03542	0.2143	0.17321	0.20034	0.12739	0.19749	0.422105	0.344725	0.315085	0.18766	0.249655	-0.014375	0.116115	0.022325	0.181505	0.12699	0.01559
YDL086W	2 - YDL086W ... YDL086W biological process unknown carboxymethylenebutenolidase activicytoplasm* | YDL087C	2	1	0.3026	0.07765	0.26914	0.15207	0.59073	0.15029	0.43581	0.304955	0.391495	0.478025	0.69177	0.436545	-0.018195	-0.230795	0.079275	-0.180825	-0.09247	-0.07915
YDL125C	2 - YDL125C ... HNT1 nucleotide metabolism hydrolase activity* cytoplasm* | YDL126C	2	1	0.07885	0.27036	0.48068	0.31231	0.40238	-0.15241	0.51975	0.225335	0.453295	0.280395	0.54625	0.479165	-0.141455	-0.359435	-0.123145	0.090965	-0.36248	0.11014
YBL005W	2 - YBL005W ... PDR3 regulation of transcription fr DNA binding* cytoplasm* | YBL006C	2	1	0.23384	0.21602	0.21831	0.38848	0.17807	-0.05959	0.36255	0.600535	0.286115	0.304895	0.27488	0.440485	-0.264005	-0.106465	-0.098355	-0.237165	-0.08131	0.01822
YNL101W	2 - YNL101W ... AVT4 neutral amino acid transport neutral amino acid transporter activacuole | YNL102W	2	1	0.1276	0.33415	0.35065	0.59333	0.25512	0.04261	0.18663	0.724035	0.530045	0.168275	0.24821	0.316825	-0.200955	-0.030645	-0.087935	-0.115355	0.06267	0.0437
YPR198W	2 - YPR198W ... SGE1 response to drug* xenobiotic-transporting ATPase actiintegral to plasma membrane | YPR199C	2	1	-0.31774	-0.05854	-0.03363	0.01994	-0.1532	-0.15187	0.53446	0.596465	0.603575	0.487375	0.55062	0.470265	-0.254345	-0.106995	-0.229925	-0.090465	-0.09504	-0.1222
YOR307C	2 - YOR307C ... SLY41 ER to Golgi transport molecular function unknown endoplasmic reticulum | YOR308C	2	1	0.16406	0.15744	0.02404	0.20164	-0.03591	0.00269	0.28022	0.546705	0.473615	0.190335	0.14408	0.417825	-0.104415	0.137825	0.125205	0.132155	0.06063	0.08103
YEL025C	2 - YEL025C ... YEL025C biological process unknown molecular function unknown cytoplasm* | YEL026W	2	1	0.26742	0.05337	0.35769	0.16368	0.27683	0.04901	0.47003	0.557205	0.224745	0.422605	0.41164	0.523985	-0.110765	0.002675	0.078445	0.303925	0.17307	0.2571
YBL089W	2 - YBL089W ... AVT5 transport transporter activity cellular component unknown | YBL090W	2	1	0.01019	0.19797	0.26838	0.41693	0.32619	-0.1284	0.35308	0.812865	0.492875	0.337135	0.5102	0.327785	-0.163085	0.066765	-0.096905	0.055035	0.25329	0.32962
YJL093C	2 - YJL093C ... TOK1 potassium ion homeostasis potassium channel activity plasma membrane | YJL094C	2	1	-0.20526	0.03874	0.01346	0.21272	0.11125	-0.13587	0.39359	0.902495	0.493205	0.154615	0.54909	0.569625	-0.240895	0.027155	-0.247395	0.045195	0.17626	0.18186
YPL270W	2 - YPL270W ... MDL2 aerobic respiration "ATPase activity, coupled to transme"mitochondrial inner membrane | YPL271W	2	1	-0.26139	0.13515	-0.00589	0.17165	-0.00078	0.09714	0.29436	0.746145	0.570385	0.236485	0.40763	0.372505	-0.019435	0.138265	-0.011565	0.130905	0.28171	-0.0294
YNL219C	2 - YNL219C ... ALG9 protein amino acid glycosylati mannosyltransferase activity endoplasmic reticulum | YNL220W	2	1	-0.10365	0.03281	0.01265	0.14912	0.10731	-0.22782	0.10228	0.478295	0.501255	0.128205	0.13394	0.304185	-0.094425	0.066265	0.082355	0.029025	0.06864	0.0667
YMR150C	2 - YMR150C ... IMP1 mitochondrial protein processi peptidase activity* mitochondrial inner membrane peptid | YMR151W	2	1	0.06101	-0.15432	0.0712	0.17447	0.26593	0.08931	0.64502	0.585445	0.347345	0.296945	0.59948	0.375815	-0.337065	-0.299845	-0.237165	-0.379095	-0.19356	-0.1371
YDR205W	2 - YDR205W ... MSC2 zinc ion homeostasis cation:cation antiporter activity nucleus* | YDR206W	2	1	0.1792	0.23931	0.40841	0.19627	0.10121	-0.21471	0.50529	0.470525	0.569955	0.365145	0.33192	0.438815	0.114265	0.071755	0.109635	0.201035	0.3828	0.35058
YER057C	2 - YER057C ... HMF1 biological process unknown molecular function unknown cytoplasm* | YER058W	2	1	0.04083	0.21931	0.124	0.1181	0.38581	0.12333	0.52855	0.401865	0.362285	0.364095	0.47027	0.507265	0.152045	0.075045	0.372765	0.296655	0.05191	0.26905
YKL146W	2 - YKL146W ... AVT3 neutral amino acid transport neutral amino acid transporter activacuole | YKL147C	2	1	0.2255	0.36579	0.42051	0.38553	0.45232	0.1149	0.51141	0.638525	0.592575	0.456385	0.57968	0.493595	-0.146905	-0.222745	0.054575	-0.074715	0.04169	0.27631
YGL187C	2 - YGL187C ... COX4 aerobic respiration* cytochrome-c oxidase activity respiratory chain complex IV (sensu | YGL188C	2	1	0.41967	0.24243	0.56898	0.26282	0.31931	0.08908	0.55151	0.536275	0.541295	0.510825	0.62727	0.467415	-0.113745	-0.236345	-0.181605	0.028225	0.01714	-0.202
YPL099C	2 - YPL099C ˜ AIM43 biological process unknown molecular function unknown mitochondrion | Protein of unknown function; the authentic, non-tagged protein is detected in purified mitochondria in high-throughput studies; null mutant displays elevated frequency of mitochondrial genome lossYPL100W	2	1	-0.13912	-0.07797	0.02698	0.06419	0.19788	0.0291	0.70162	0.458905	0.365035	0.446325	0.38819	0.388935	0.080465	0.056925	-0.049035	-0.058655	0.26246	0.05212
YCR105W	2 - YCR105W ... ADH7 alcohol metabolism alcohol dehydrogenase (NADP+) activsoluble fraction | YCR106W	2	1	0.16905	-0.06743	-0.03968	0.03121	0.13745	-0.09122	0.48293	0.449005	-0.154735	0.617055	0.35557	0.607525	-0.034445	0.110785	-0.380375	0.034865	-0.18611	-0.07925
YFL011W	2 - YFL011W ... HXT10 hexose transport glucose transporter activity* mitochondrion* | YFL012W	2	1	0.29439	0.2353	0.27909	0.10019	0.16986	0.09241	0.43679	0.257025	0.323885	0.597845	0.49021	0.820465	-0.166315	0.003085	0.166175	-0.043585	-0.18927	0.21865
YMR156C	2 - YMR156C ... TPP1 DNA repair polynucleotide 3'-phosphatase activcellular component unknown | YMR157C	2	1	0.27402	0.14953	0.35865	0.12489	0.43316	0.36386	0.50395	0.339445	0.586775	0.844595	0.47102	0.660815	-0.219115	0.178285	0.042485	0.227715	-0.44738	0.11904
YOR392W	2 - YOR392W ... | YOR393W	2	1	-0.14379	-0.01894	0.02398	0.07055	0.07742	0.09911	0.83328	0.431775	0.497925	0.425685	0.48773	0.720485	-0.292705	0.043805	-0.329935	-0.261525	-0.08797	-0.23895
YGR168C	2 - YGR168C ... YGR168C biological process unknown molecular function unknown cellular component unknown | YGR169C	2	1	0.26396	0.24205	0.19855	0.32166	-0.08185	0.57486	0.61326	0.441305	0.236865	0.584445	0.2193	0.297795	-0.188925	0.135485	0.016355	-0.014905	-0.08961	-0.04366
YPL072W	2 - YPL072W ... UBP16 protein deubiquitination ubiquitin-specific protease activitcytoplasm | YPL073C	2	1	0.35472	0.32441	-0.00255	-0.17175	0.07176	0.22626	0.2194	0.321015	0.261285	1.04065	0.47358	0.452715	0.248915	-0.095535	0.117355	-0.075615	-0.34077	0.14656
YMR157C	2 - YMR157C ˜ AIM36 biological process unknown molecular function unknown mitochondrion | Protein of unknown function; null mutant displays reduced respiratory growth and elevated frequency of mitochondrial genome loss; the authentic, non-tagged protein is detected in purified mitochondria in high-throughput studiesYMR158C-A	2	1	0.04864	0.11763	0.55984	0.32289	0.23771	0.28326	0.7719	0.385735	0.205785	0.521705	0.72013	0.353855	0.193005	0.117055	0.103185	0.252765	0.14794	-0.30166
YIL037C	2 - YIL037C ... PRM2 conjugation with cellular fusi molecular function unknown integral to membrane | YIL038C	2	1	0.24625	0.02921	0.19841	-0.06374	-0.28817	0.02596	0.25682	0.209285	0.556835	0.302105	0.54769	0.458695	0.163455	0.029525	0.432055	-0.030925	0.05511	0.32801
YKR088C	2 - YKR088C ... TVP38 biological process unknown molecular function unknown cytoplasm | YKR089C	2	1	0.37565	0.49683	0.41208	0.40471	0.36745	0.31583	0.64048	0.257605	0.430305	0.315495	0.5176	0.354505	-0.180805	-0.130235	-0.050845	-0.014925	-0.52711	0.08632
YBL045C	2 - YBL045C ... COR1 aerobic respiration ubiquinol-cytochrome-c reductase acrespiratory chain complex III (sens | YBL046W	2	1	0.43947	0.15294	0.32341	0.26186	0.29658	0.16364	0.33816	0.383855	0.101985	0.425395	0.24474	0.477285	0.148665	-0.218625	-0.072585	-0.057465	-0.08188	-0.20881
YBL085W	2 - YBL085W ... BOI1 establishment of cell polarity phospholipid binding bud neck* | YBL086C	2	1	0.36689	0.39871	0.3607	0.12406	0.06605	0.33055	0.19051	0.118855	0.575385	0.425875	0.35191	0.450055	-0.082665	-0.209405	-0.188035	-0.258815	-0.19208	-0.23011
YKR065C	2 - YKR065C ˜ PAM17 biological process unknown molecular function unknown mitochondrion* | Presequence translocase-associated motor subunit, required for stable complex formation between cochaperones Pam16p and Pam18p, promotes association of Pam16p-Pam18p with the presequence translocaseYKR066C	2	1	-0.00152	0.36423	0.25072	0.1884	0.30171	0.04973	0.33142	0.101625	0.160195	0.129295	0.32932	0.274525	-0.113015	-0.193405	-0.024895	0.110915	-0.46316	-0.11065
YHR181W	2 - YHR181W ... SVP26 biological process unknown molecular function unknown endoplasmic reticulum | YHR182C-A	2	1	0.30018	0.1338	0.10333	0.27076	0.29412	-0.02494	0.47227	0.143575	0.280045	0.036275	0.36712	0.232605	-0.132395	-0.245545	-0.056125	0.008165	-0.36372	-0.07102
YJR013W	2 - YJR013W ... GPI14 GPI anchor biosynthesis mannosyltransferase activity endoplasmic reticulum membrane | YJR014W	2	1	0.23311	0.38637	0.37842	0.55072	0.2324	0.16836	0.1371	0.568095	0.189045	0.128715	0.45686	0.307175	-0.300835	-0.353655	-0.143555	-0.320035	-0.00061	0.04118
YNL294C	2 - YNL294C ... RIM21 sporulation (sensu Fungi)* molecular function unknown cellular component unknown | YNL295W	2	1	-0.16621	0.25763	0.31967	0.18409	-0.05564	-0.06549	0.1759	0.102505	0.246195	0.195255	0.21943	0.196425	-0.334345	-0.242415	-0.203885	-0.057215	-0.21655	-0.22497
YDR529C	2 - YDR529C ... QCR7 aerobic respiration* ubiquinol-cytochrome-c reductase acrespiratory chain complex III (sens | YDR530C	2	1	0.35996	0.06289	0.36415	0.17148	0.11935	0.11523	0.33733	0.128505	0.357145	0.454725	0.42963	0.303355	-0.086875	-0.155585	-0.168505	-0.095725	-0.48672	-0.61017
YGL041W-A	2 - YGL041W-A ˜ Putative protein of unknown function, conserved in fungi; identified by expression profiling and mass spectrometryYGL063C-A	2	1	0.37353	0.15138	0.55482	0.23054	-0.07747	0.18102	0.09261	0.044365	0.230015	0.415095	0.36659	0.037195	0.120935	-0.255385	-0.103265	-0.068825	-0.44503	-0.19787
YOR258W	2 - YOR258W ... HNT3 biological process unknown molecular function unknown cytoplasm* | YOR259C	2	1	0.11199	0.06906	0.33652	0.25525	-0.10765	0.31819	0.17402	0.383955	0.180475	0.656095	0.1537	0.261685	-0.317485	-0.218465	-0.174235	-0.230145	-0.49296	-0.06586
YMR102C	2 - YMR102C ... YMR102C biological process unknown molecular function unknown cellular component unknown | YMR103C	2	1	0.28317	0.22796	0.12155	0.30146	-0.13879	0.35149	0.13137	0.348935	0.221385	0.070945	0.14676	0.152835	-0.040445	-0.076595	-0.120395	-0.209125	-0.06367	-0.23701
YPR188C	2 - YPR188C ... MLC2 cytokinesis, contractile ring myosin II binding contractile ring (sensu Saccharomyc | YPR189W	2	1	0.27699	0.06142	0.18581	0.23035	0.16183	0.10965	0.24244	0.149105	0.260965	0.200505	0.17132	-0.022685	0.131265	0.071875	-0.056265	-0.164735	-0.08373	-0.20405
YNL172W	2 - YNL172W ... APC1 mitotic sister chromatid segre protein binding* anaphase-promoting complex | YNL173C	2	1	0.13582	0.27419	0.23692	0.36516	0.26786	0.20487	0.27837	0.256055	0.218155	0.221845	0.11973	0.341145	-0.251615	0.134485	-0.063165	0.005395	-0.04803	0.11677
YDR414C	2 - YDR414C ... ERD1 protein-ER retention molecular function unknown membrane | YDR415C	2	1	0.19822	0.30742	0.20038	0.23606	0.21111	0.0414	0.22587	0.214595	0.282835	0.009895	0.14126	0.055995	-0.283785	-0.200045	-0.175215	-0.121635	0.05498	-0.09302
YGR227W	2 - YGR227W ... DIE2 N-linked glycosylation* dolichyl-phosphate-glucose-glycolipendoplasmic reticulum membrane | YGR228W	2	1	-0.09925	0.08801	0.30915	0.05414	0.08379	-0.29622	0.39495	0.119915	0.364685	0.436875	0.2034	0.127815	-0.343715	-0.125795	-0.108125	-0.081935	-0.0409	0.09475
YCL048W	2 - YCL048W ... SPS22 cell wall organization and bio molecular function unknown plasma membrane | YCL049C	2	1	0.40891	0.15597	0.39615	0.31004	0.22395	-0.03133	0.37026	0.034535	0.082745	0.169655	0.58804	0.606625	0.134845	-0.228145	-0.056225	-0.376325	-0.08496	0.03721
YBR040W	2 - YBR040W ... FIG1 cellular morphogenesis during molecular function unknown cell wall (sensu Fungi)* | YBR041W	2	1	0.3049	0.46663	0.25088	-0.00587	0.38101	0.28116	0.10596	0.008085	0.347705	0.418205	0.29412	0.552335	0.058305	-0.336495	0.187525	-0.285835	0.18744	-0.19892
YPL225W	2 - YPL225W ... YPL225W biological process unknown molecular function unknown cytoplasm | YPL226W	2	1	0.39766	0.18191	0.13764	0.25213	-0.29992	0.31453	0.39793	0.226245	0.150155	0.515355	0.25088	0.212215	-0.109675	-0.168415	-0.004305	-0.162815	0.10863	-0.60935
YKR035W-A	2 - YKR035W-A ... DID2 protein-vacuolar targeting* molecular function unknown cytoplasm* | YKR036C	2	1	0.18901	0.24051	0.13293	0.35266	-0.00724	0.05525	0.13795	0.222555	0.527845	0.296905	0.73117	0.217635	0.108425	-0.044805	0.057075	-0.391885	-0.03117	-0.47384
YOR328W	2 - YOR328W ... PDR10 multidrug transport "ATPase activity, coupled to transme"plasma membrane | YOR329C	2	1	0.12484	0.33401	0.24098	0.38624	0.19133	0.44365	0.33374	0.502795	0.229085	0.431725	0.33429	0.176155	-0.453635	0.073735	-0.402295	0.170415	-0.15417	0.21957
YLR108C	2 - YLR108C ... YLR108C biological process unknown molecular function unknown nucleus | YLR109W	2	1	0.4553	0.05648	0.44544	0.37354	0.70918	0.17093	0.17743	0.199805	0.481515	0.228975	0.17117	0.688535	-0.203555	-0.431475	-0.024855	0.113745	-0.22305	-0.29549
YPL148C	2 - YPL148C ... PPT2 protein-cofactor linkage phosphopantetheinyltransferase actimitochondrion | YPL149W	2	1	0.21213	0.39105	0.18376	0.14838	0.29479	0.55488	-0.14849	0.319285	0.049105	0.647445	0.10347	0.289975	-0.500725	0.077245	-0.216275	-0.103145	-0.05729	-0.17989
YFR039C	2 - YFR039C ... YFR039C biological process unknown molecular function unknown cellular component unknown | YFR040W	2	1	0.05564	0.33612	0.00025	0.44461	-0.12177	0.25264	0.32801	0.439715	0.268585	0.153155	0.34652	0.280365	-0.289925	-0.256355	-0.089945	-0.459025	-0.61226	-0.01157
YKR066C	4 - YKR066C iESR cluster CCP1 response to oxidative stress cytochrome-c peroxidase activity mitochondrion* | YKR067W	4	1	-0.04488	-0.01689	0.05884	-0.00305	0.30428	-0.07844	0.43894	0.826615	0.563625	0.236595	0.42659	0.271105	-0.676895	-0.644065	-0.509195	0.492745	-0.5713	-0.26219
YDR329C	4 - YDR329C ... PEX3 peroxisome organization and bi protein binding peroxisomal membrane | YDR330W	4	1	0.10754	0.34628	0.37351	0.51374	0.07104	0.30936	0.53846	0.542735	0.879235	0.652025	0.76615	0.716405	-0.116325	-0.134345	0.181485	-0.028555	-0.10053	0.19504
YHR193C-A	4 - YHR193C-A | YHR194W	4	1	0.38141	0.24915	0.16926	0.29965	0.17943	-0.32352	0.95939	0.501675	0.068555	0.665905	0.74781	0.555925	0.061535	-0.615105	-0.040875	0.554255	0.0664	-0.14427
YBR120C	4 - YBR120C ... CBP6 protein biosynthesis molecular function unknown mitochondrion | YBR121C	4	1	0.39248	0.54474	0.18981	0.28876	0.22677	0.36933	0.6306	0.351905	0.662495	0.747965	1.1436	0.402095	0.080435	-0.323005	-0.128675	-0.016355	-0.40226	-0.48065
YGR182C	4 - YGR182C ... | YGR183C	4	1	0.1771	0.15837	0.28847	0.04662	-0.22305	0.42125	1.11309	0.416455	0.773775	1.03658	1.20016	1.11675	-0.259485	-0.681845	-0.134545	0.224445	-0.37418	-0.52464
YDR357C	4 - YDR357C ... YDR357C biological process unknown molecular function unknown cytoplasm | YDR358W	4	1	0.25903	0.18977	0.03225	0.32551	0.01455	0.32543	0.80627	0.479425	0.963355	0.986385	0.89855	0.571835	0.039375	0.037535	-0.057265	-0.050895	-0.12298	-0.44958
YJR094C	4 - YJR094C ... IME1 meiosis transcription regulator activity nucleus | YJR094W-A	4	1	0.3446	0.1802	0.12399	0.16326	0.12206	0.66357	0.67201	0.844135	0.401715	0.913255	0.62943	1.00728	0.169125	0.019105	0.102545	-0.295005	-0.09578	-0.03123
YGR183C	4 - YGR183C ... QCR9 aerobic respiration* ubiquinol-cytochrome-c reductase acrespiratory chain complex III (sens | YGR184C	4	1	0.211	0.22574	0.22951	0.25129	-0.04386	0.29531	1.09038	1.0369	1.02056	0.521645	1.14736	1.02649	-0.180895	-0.152975	0.029995	0.273345	0.08279	-0.30372
YOL023W	4 - YOL023W ... IFM1 translational initiation RNA binding* mitochondrion | YOL024W	4	1	-0.19874	0.13219	0.10976	-0.11649	-0.15359	0.21077	1.08454	0.690515	0.978515	1.38543	1.50896	0.812555	0.158545	0.012495	0.168275	0.054855	-0.00294	-0.01722
YHR051W	4 - YHR051W ... COX6 aerobic respiration* cytochrome-c oxidase activity respiratory chain complex IV (sensu | YHR052W	4	1	0.4812	0.14407	0.42065	0.59232	-0.04515	0.58563	0.60486	0.986045	0.489345	0.642925	0.45957	0.654455	0.006405	0.111165	0.132735	0.097655	0.29275	-0.33226
YMR101C	4 - YMR101C ... SRT1 protein amino acid glycosylati prenyltransferase activity lipid particle | YMR102C	4	1	0.1109	0.15861	0.29191	0.20588	0.09208	0.66672	0.37939	0.773155	0.576085	1.04751	0.38602	1.36208	-0.026115	0.379345	0.158115	0.303885	0.16084	0.033
YGL188C	4 - YGL188C ... | YGL188C-A	4	1	0.35179	0.18013	0.2494	0.08179	-0.47107	0.22468	0.70041	0.020535	0.724705	0.922705	0.84222	0.347655	-0.289465	-0.641205	-0.268675	-0.353865	-0.51259	-0.68478
YER182W	4 - YER182W ... FMP10 biological process unknown molecular function unknown mitochondrion | YER183C	4	1	0.17793	0.15199	0.47123	0.14083	0.05073	0.20458	0.57386	0.343405	0.816825	1.00425	0.75267	0.624655	0.244295	-0.114935	0.021575	0.439495	0.30928	-0.26858
YGR025W	4 - YGR025W ... | YGR026W	4	1	0.47061	0.13899	0.53816	0.5175	-0.3255	0.02817	0.75442	0.872325	0.900685	1.16938	0.8194	0.515225	0.340135	0.140995	0.686425	0.276945	0.42612	-0.10976
YEL038W	4 - YEL038W ... UTR4 biological process unknown molecular function unknown cytoplasm* | YEL039C	4	1	0.14465	0.03329	0.39666	0.15666	0.47856	0.06418	1.38974	1.21169	0.953395	0.573485	0.93275	1.09193	0.274085	0.043885	0.327125	0.267805	0.42018	0.43694
YNR001W-A	4 - YNR001W-A ... | YNR002C	4	1	-0.14457	-0.68738	-0.02037	0.72687	0.30622	0.10747	1.01068	1.13692	0.323305	1.27591	0.57376	1.08746	-0.276835	0.409585	-0.427055	-0.443005	0.18954	0.02935
YHR214C-D	4 - YHR214C-D ... YHR214C-D biological process unknown molecular function unknown cellular component unknown | YHR214C-E	4	1	0.39578	0.46518	0.1968	0.23603	0.39663	0.04973	1.04065	0.957095	1.21365	0.283175	0.26239	0.208985	0.192215	-0.497845	-0.123045	-0.260115	0.25666	-0.22235
YBL044W	4 - YBL044W ... YBL044W biological process unknown molecular function unknown cellular component unknown | YBL045C	4	1	0.43804	-0.11889	-0.11523	0.12048	-0.40738	-0.3705	0.8647	0.797045	0.759365	1.29438	0.59542	0.820155	0.033235	-0.673275	-0.129375	-0.035375	-0.55949	0.16306
YBR051W	4 - YBR051W ... | YBR052C	4	1	0.34512	0.6264	0.1868	0.52249	0.14687	0.32521	0.74964	0.456525	0.857005	0.788185	0.52857	1.10137	-0.142625	-0.284185	-0.615915	0.493435	0.18938	-0.17509
YML057C-A	4 - YML057C-A ˜ Dubious Dubious open reading frame unlikely to encode a protein, based on available experimental and comparative sequence data; overlaps the verified gene CMP2/YML057WYML094C-A	4	1	0.17521	0.22947	0.25792	0.79109	0.31636	0.14111	0.78368	1.43752	1.07483	0.831785	0.29489	1.47717	-0.120235	0.573285	0.346975	0.167085	0.35095	-0.20838
YIL049W	4 - YIL049W ... DFG10 pseudohyphal growth molecular function unknown cellular component unknown | YIL050W	4	1	0.68812	0.43393	0.4499	0.60937	-0.25561	0.24897	1.10658	0.714055	1.19558	1.558	1.06938	0.922215	0.098275	0.034315	0.367165	0.394825	-0.13499	0.35629
YPR145C-A	4 - YPR145C-A YPR145C-A YAL016C-A	4	1	0.39349	-0.53616	0.34365	0.60291	-0.29799	0.61362	1.08219	0.555875	0.768965	1.50622	1.42817	1.56195	0.500005	-0.150645	0.374795	0.007765	0.21293	-0.36343
YIR019C	4 - YIR019C ... MUC1 pseudohyphal growth* molecular function unknown plasma membrane | YIR020C	4	1	0.29077	0.45544	0.52448	0.57866	0.11894	0.47633	0.92411	0.575335	0.996205	1.10867	1.00575	0.702995	-0.509085	-1.27316	-0.459215	0.614735	0.10549	-0.10532
YDL197C	4 - YDL197C ... ASF2 chromatin silencing at silent molecular function unknown nucleus* | YDL198C	4	1	0.4284	0.54635	0.40844	0.40825	0.37073	0.45677	0.72143	0.525915	0.865115	1.02146	0.839	0.649175	-0.017195	-0.139065	-0.192725	-0.025635	-0.13931	0.23478
YKR102W	4 - YKR102W ... FLO10 flocculation (sensu Saccharomy mannose binding cell wall (sensu Fungi) | YKR103W	4	1	0.32637	0.56196	0.40919	0.42098	0.62721	0.35886	0.69281	0.915455	0.533745	0.827465	0.4303	0.530255	-0.226575	-0.228515	-0.086545	0.059965	-0.13772	0.06218
YLL041C	4 - YLL041C ... SDH2 tricarboxylic acid cycle* succinate dehydrogenase (ubiquinonerespiratory chain complex II (sensu | YLL042C	4	1	0.67871	0.39054	0.58579	0.70609	0.42741	0.71891	0.91658	0.963795	0.760365	1.26896	0.83273	1.04696	-0.482105	-0.517195	-0.222555	0.690115	-0.03997	-0.41715
YJL166W	4 - YJL166W ... QCR8 aerobic respiration* ubiquinol-cytochrome-c reductase acrespiratory chain complex III (sens | YJL167W	4	1	0.69087	0.51655	0.81482	0.76108	0.48772	0.55057	0.96312	0.312645	0.868165	1.10112	0.90936	0.676985	-0.361635	-0.296115	-0.122555	-0.101765	-0.30841	-0.61099
YLR416C	4 - YLR416C ... | YLR417W	4	1	0.12236	0.71183	0.81147	0.70417	0.40135	0.65533	0.53841	0.509385	0.964245	1.14356	1.19352	0.970465	0.365585	0.454615	0.063835	0.221765	0.09943	-0.02424
YGR213C	4 - YGR213C ... RTA1 biological process unknown molecular function unknown integral to membrane | YGR214W	4	1	0.16574	0.96289	0.39612	0.71973	0.26973	0.73454	0.34896	0.406665	0.228865	0.862235	0.2998	0.631275	-0.646505	-0.358755	-0.547255	-0.460055	-0.09587	-0.19218
YCR096C	4 - YCR096C ... HMRA2 biological process unknown molecular function unknown cellular component unknown | YCR097W	4	1	1.05718	0.82411	0.93549	0.8198	-0.12214	0.62851	0.48095	0.076995	0.780525	0.770105	0.9822	0.281625	0.280495	-0.089425	0.258785	0.141695	-0.39088	-0.64397
YMR151W	4 - YMR151W ˜ YIM2 | Dubious open reading frame, unlikely to encode a protein; not conserved in closely related Saccharomyces species; 5% of ORF overlaps the verified gene IMP1YMR152W	4	1	0.23016	0.79418	0.4485	0.15258	0.9025	0.73547	0.92693	0.779875	0.217505	0.693665	-0.05081	0.707705	-0.237435	-0.335985	-0.173555	-0.144975	-0.48232	0.1422
YDR286C	4 - YDR286C iESR cluster YDR286C biological process unknown molecular function unknown cellular component unknown | YDR287W	4	1	0.75581	0.07128	0.30443	0.36279	0.45106	0.38831	0.62741	0.239805	0.474735	0.573675	0.62666	0.506925	-0.018335	-0.520655	-0.179755	-0.557535	-0.72361	-0.46423
YLR317W	4 - YLR317W ... | YLR318W	4	1	0.30318	0.46722	0.46789	0.47311	0.55121	0.22642	1.08481	0.650165	1.00314	1.22117	1.40856	1.02402	0.445875	0.051325	0.192595	0.553595	0.18156	0.64679
YGR131W	8 - YGR131W ... YGR131W biological process unknown molecular function unknown cellular component unknown | YGR132C	8	1	0.15213	0.81486	0.32859	0.60531	0.04345	1.36258	1.48059	1.49687	1.20233	1.50609	0.93269	1.71259	-0.566555	-0.019885	0.036045	0.360735	0.40397	-0.00561
YIL056W	8 - YIL056W ˜ VHR1 biological process unknown molecular function unknown | Transcriptional activator, required for the vitamin H-responsive element (VHRE) mediated induction of VHT1 (Vitamin H transporter) and BIO5 (biotin biosynthesis intermediate transporter) in response to low biotin concentrationsYIL057C	8	1	0.67112	1.00791	0.75452	0.93367	0.33463	0.03538	1.55971	1.08254	1.84119	1.44233	1.24131	1.50762	-0.848025	-1.03042	-0.587515	-0.361405	-0.70731	-0.55192
YKL051W	8 - YKL051W ... SFK1 actin cytoskeleton organizatio molecular function unknown plasma membrane | YKL052C	8	1	-0.04601	0.1527	-0.08912	-0.27967	0.22771	0.00874	1.36201	1.47005	1.43432	1.22903	1.386	1.38468	-0.580275	-0.653045	-0.490665	-0.228755	-0.22649	-0.2494
YJR115W	8 - YJR115W ... YJR115W biological process unknown molecular function unknown cellular component unknown | YJR116W	8	1	0.57449	1.25354	1.00624	1.22882	0.59038	0.36424	1.45997	1.04408	2.01613	1.27929	1.36095	1.31309	-1.14749	-1.16281	-0.966595	0.234705	-0.87142	-0.33286
YBR056W-A	8 - YBR056W-A ... YBR056W-A biological process unknown molecular function unknown cellular component unknown | YBR057C	8	1	0.70792	0.56086	1.28434	1.54863	0.4312	0.92859	1.87557	1.24734	1.81767	2.24959	2.63174	2.19801	-0.018715	0.132185	-0.249055	-0.210405	-0.49013	-0.33865
YNL196C	8 - YNL196C ˜ SLZ1 biological process unknown molecular function unknown | Sporulation-specific protein with a leucine zipper motifYNL197C	8	1	0.01188	0.6897	0.50943	0.9286	0.39137	0.30442	1.17664	1.23314	1.02419	1.7757	1.18876	2.12931	-0.241215	-0.305545	-0.375345	0.091175	0.17983	-0.1095
YOL085C	8 - YOL085C ... | YOL086C	8	1	0.35667	1.1692	0.17691	0.8298	-0.78826	0.89438	1.79518	1.84855	1.26275	2.68771	1.83471	2.42368	-0.035975	-0.344195	0.899195	0.079555	-0.11314	-0.74785
YDR040C	8 - YDR040C ... ENA1 sodium ion transport "ATPase activity, coupled to transme"plasma membrane | YDR041W	8	1	-0.76085	0.12286	-0.63483	0.00868	-1.10073	-0.31775	2.2733	2.45444	1.36645	1.80177	2.12854	2.81189	-0.451905	0.092775	0.433635	-0.747175	0.23293	-0.22275
YDL168W	8 - YDL168W ... SFA1 formaldehyde catabolism alcohol dehydrogenase activity* cytoplasm* | YDL169C	8	1	-0.00587	-0.17097	-0.0475	0.23314	0.32801	-0.10582	2.72706	2.78841	2.38552	2.56217	2.57632	2.71841	-0.578445	-0.285485	-0.218635	-0.114445	-0.12585	-0.26839
YOR049C	8 - YOR049C ... RSB1 fatty acid transport* phospholipid-translocating ATPase aendoplasmic reticulum* | YOR050C	8	1	0.05707	0.41778	-0.02562	0.45795	0.13665	0.54897	3.09747	3.06871	2.7197	3.24924	2.62773	3.14163	-0.720755	-0.760795	-0.447565	-0.327965	-0.13397	-0.15524
YPL189C-A	8 - YPL189C-A ˜ COA2 biological process unknown molecular function unknown | Cytochrome oxidase assembly factor; null mutation results in respiratory deficiency with specific loss of cytochrome oxidase activity; functions downstream of assembly factors Mss51p and Coa1p and interacts with assembly factor Shy1pYPL189W	8	1	-0.06805	0.27727	-0.08508	0.30149	0.35666	0.46358	2.13189	1.91956	1.97327	1.6785	1.75266	1.94569	-0.322875	-0.361725	-0.258505	0.394485	0.25327	-0.19038
YML089C	8 - YML089C ... | YML090W	8	1	0.23102	-0.41834	0.16373	0.36921	0.2272	0.10503	1.94823	1.47649	1.66094	2.65641	2.36064	2.40802	-0.508235	-0.106575	-0.336235	-0.178865	-0.75921	-0.4658
YLR300W	8 - YLR300W ... EXG1 cell wall organization and bio "glucan 1,3-beta-glucosidase activit"cell wall (sensu Fungi) | YLR301W	8	1	-0.63782	-0.51369	-0.43334	-0.3375	-0.63292	-0.50311	2.20175	2.67652	2.27851	2.3474	2.40401	2.5367	-0.722165	-0.716095	-0.771695	-0.316945	-0.49266	-0.877
YCR020C	8 - YCR020C ... PET18 mitochondrion organization and molecular function unknown cellular component unknown | YCR020C-A	8	1	-0.24561	-0.07901	-0.27688	-0.52401	-0.22562	0.1371	1.71811	1.74226	1.6083	1.5984	1.20864	1.59004	-0.847315	-0.705625	-0.765895	-0.998045	-1.1677	-0.87578
YDR033W	8 - YDR033W ... MRH1 biological process unknown molecular function unknown mitochondrion* | YDR034C	8	1	-0.54854	-0.26382	-0.52363	-0.24697	-0.61721	-0.38761	1.18604	1.91124	2.10139	0.754675	1.30576	1.46863	-0.423605	-0.252695	-0.172985	0.079145	0.2654	0.02198
YIL010W	3 - YIL010W ... DOT5 regulation of cell redox homeo thioredoxin peroxidase activity nucleus | YIL011W	3	4	-0.02531	-0.42894	-0.05057	-0.47293	0.00457	-0.19541	0.56926	0.511265	0.324535	0.518625	0.45097	0.437915	0.103015	-0.013745	0.091455	-0.019125	0.03778	-0.01153
YOL026C	3 - YOL026C ... MIM1 protein complex assembly* molecular function unknown mitochondrial outer membrane* | YOL027C	3	4	0.21425	0.14286	0.14394	-0.2303	0.36013	0.04608	0.60348	0.235495	0.516575	0.598235	0.78093	0.551465	0.258695	0.104075	0.287215	0.270775	-0.10094	0.4262
YLR089C	3 - YLR089C ... ALT1 biological process unknown transaminase activity mitochondrion | YLR090W	3	4	-0.33875	-0.0425	-0.11274	-0.13947	-0.005	-0.27477	0.72857	1.01893	0.796405	0.585595	0.73126	0.801155	-0.043575	0.010075	0.265205	-0.115695	0.2265	0.3455
YNR041C	3 - YNR041C ... COQ2 ubiquinone metabolism prenyltransferase activity* mitochondrial inner membrane | YNR042W	3	4	-0.31426	-0.0265	-0.15791	-0.12421	-0.06113	-0.52295	0.99114	0.714925	0.957065	0.498225	1.02832	0.510215	0.055135	0.007545	0.233225	0.191995	0.33102	0.3318
YIL059C	3 - YIL059C | YIL060W	3	4	-0.31803	-0.46815	0.15557	-0.1915	-0.07351	-0.01685	0.44526	0.665025	0.138415	0.638815	0.14301	0.749785	0.038145	0.114655	0.113835	-0.053335	0.17293	0.02008
YDR276C	3 - YDR276C ... PMP3 cation transport molecular function unknown plasma membrane | YDR277C	3	4	-0.15137	0.01732	0.17757	0.25381	0.53755	-0.13079	0.66616	0.243105	0.830235	0.687285	0.8351	0.466745	0.232775	0.304465	0.292575	0.096075	0.24829	-0.01475
YDR006C	3 - YDR006C ... SOK1 cAMP-mediated signaling molecular function unknown nucleus | YDR007W	3	4	0.03629	-0.10611	-0.00214	-0.19179	-0.03347	-0.13736	0.69815	0.571895	0.933585	0.841055	0.47826	0.927195	0.392875	0.232525	0.494395	0.339755	0.18286	0.46095
YDR512C	3 - YDR512C iESR cluster EMI1 sporulation (sensu Fungi) molecular function unknown cellular component unknown | YDR513W	3	4	0.16048	-0.0647	0.26527	-0.02692	0.01228	-0.06152	1.23241	0.799355	0.696905	1.08723	1.18202	0.977395	0.504595	0.242935	0.448685	0.619895	0.31564	0.46847
YPL192C	3 - YPL192C ... PRM3 karyogamy molecular function unknown nuclear membrane | YPL193W	3	4	0.22894	0.45404	0.06703	-0.05692	-0.30427	0.08591	0.21606	0.797155	0.889625	0.425935	0.83441	0.365935	0.674395	0.219765	0.051035	0.804955	0.42697	0.61063
YGR102C	3 - YGR102C ... YGR102C biological process unknown molecular function unknown mitochondrion | YGR103W	3	4	-0.17238	-0.23718	-0.53968	-0.38667	0.09421	-0.47108	0.37794	0.149175	0.968425	0.536835	0.86025	0.052275	-0.028025	-0.189735	0.096865	-0.023215	0.39206	0.11988
YIL051C	3 - YIL051C ... MMF1 mitochondrial genome maintenan molecular function unknown mitochondrion* | YIL052C	3	4	-0.76151	-0.50459	-0.69793	-0.36033	-0.0433	-0.51211	0.69178	0.474575	0.411795	0.503455	0.67689	0.696975	0.437825	0.299565	0.525415	0.351595	0.44596	0.51235
YHR214C-E	3 - YHR214C-E ... YHR214C-E biological process unknown molecular function unknown cellular component unknown | YHR214W	3	4	-0.21093	-0.11389	-0.30883	-0.07874	0.33039	-0.08453	0.65164	0.271335	0.483345	1.0508	0.79865	1.34725	0.306495	0.329585	0.259505	0.313335	0.64306	0.61479
YLR092W	3 - YLR092W ... SUL2 sulfate transport sulfate transporter activity plasma membrane | YLR093C	3	4	0.08902	0.17522	0.07478	-0.28428	0.0793	-0.00962	0.49144	0.503375	0.469455	0.838975	0.69025	0.773575	0.134885	0.024955	0.018975	0.336045	0.50874	0.53906
YCR083W	3 - YCR083W ... TRX3 response to oxidative stress thiol-disulfide exchange intermediamitochondrion | YCR084C	3	4	0.00759	-0.13289	-0.26162	-0.48197	0.0942	-0.20991	0.91354	0.877065	0.688975	1.01253	1.09918	0.694595	0.317905	0.027235	0.312705	0.216575	0.32296	0.22859
YMR189W	3 - YMR189W ... GCV2 one-carbon compound metabolism glycine dehydrogenase (decarboxylatmitochondrion* | YMR190C	3	4	-0.23611	-0.48004	-0.26101	-0.37872	-0.05286	-0.22228	0.79668	0.635625	0.296465	0.667105	0.97489	0.570875	0.172355	0.285835	0.227115	0.075415	0.34345	0.2551
YML034W	3 - YML034W ... SRC1 mitotic sister chromatid segre molecular function unknown cellular component unknown | YML035C	3	4	-0.23724	0.01404	-0.15014	0.01327	-0.47218	-0.17976	0.60261	0.636365	0.869775	0.768545	0.77666	0.796765	0.218785	0.191865	0.484375	0.042535	0.04838	0.37696
YNL037C	3 - YNL037C ... IDH1 tricarboxylic acid cycle* isocitrate dehydrogenase (NAD+) actmitochondrial matrix* | YNL038W	3	4	-0.43486	-0.57617	-0.31578	-0.43002	-0.01396	-0.54862	0.63324	0.834785	0.293115	0.526985	0.97946	0.549065	0.207945	-0.084735	0.009985	0.205295	0.36727	0.09551
YJL214W	3 - YJL214W ... HXT8 hexose transport glucose transporter activity* plasma membrane | YJL215C	3	4	0.10557	-0.02189	-0.24691	0.15823	0.01219	-0.12303	0.5241	0.714335	0.754665	0.564445	0.34853	0.520765	-0.076005	0.537485	-0.098725	0.186105	0.20603	0.71841
YPR192W	3 - YPR192W ... AQY1 water transport water channel activity plasma membrane | YPR193C	3	4	-0.43843	0.07623	-0.2741	0.02588	-0.43856	0.07774	0.7441	0.941625	0.899355	1.24127	0.66492	0.997295	0.282185	0.312095	0.120745	1.00196	0.11424	0.71057
YOR011W	3 - YOR011W ... AUS1 sterol transport "ATPase activity, coupled to transme"mitochondrion* | YOR011W-A	3	4	-0.36775	-0.0323	-0.11433	-0.04873	-0.13978	-0.48399	0.35635	0.721295	0.534725	0.964785	0.1148	0.714025	0.137775	0.877565	0.220485	0.706315	0.24315	0.69294
YOR237W	3 - YOR237W ... HES1 steroid biosynthesis oxysterol binding cellular component unknown | YOR238W	3	4	-0.38522	-0.18257	-0.3691	-0.14477	-0.49825	-0.08447	0.25563	0.616295	0.446845	0.438805	0.30114	1.23059	-0.011585	0.094215	0.083735	0.396425	0.14237	0.17449
YGR146C	3 - YGR146C ... YGR146C biological process unknown molecular function unknown cellular component unknown | YGR146C-A	3	4	-0.18131	0.247	0.23322	0.60604	-0.50519	-0.52894	0.4756	0.181445	0.685805	0.769695	0.56723	0.829205	0.318885	0.089705	0.826875	0.531005	0.5855	1.17713
YLR377C	3 - YLR377C ... FBP1 gluconeogenesis fructose-bisphosphatase activity cytosol | YLR378C	3	4	-0.08833	-0.42626	0.0654	0.4237	0.13118	0.03378	0.3918	0.700735	0.886305	0.502715	0.16435	0.538455	0.235945	0.530765	0.336275	0.302555	-0.17001	0.50333
YBR196C	3 - YBR196C ... PGI1 glycolysis* glucose-6-phosphate isomerase activcytosol | YBR196C-A	3	4	-0.62647	-0.13753	-0.50699	-0.05888	0.27811	-0.34038	0.5814	1.03306	0.875885	0.781885	0.82341	0.608615	0.594185	0.727215	0.588405	0.481695	0.70087	0.67503
YLL050C	3 - YLL050C ... COF1 actin filament organization* protein binding actin cortical patch | YLL051C	3	4	0.07263	-0.06572	0.13982	0.14817	0.25959	0.02985	0.72085	0.032005	0.553905	0.573955	0.67532	0.503615	0.221635	0.170745	0.382185	0.460355	0.37425	0.47382
YIL162W	3 - YIL162W ... SUC2 sucrose catabolism beta-fructofuranosidase activity cytoplasm* | YIL163C	3	4	0.05263	0.12301	-0.15433	0.0789	0.32133	-0.14927	0.66736	0.576355	0.474065	0.381125	0.60631	0.498125	0.320585	0.233715	0.243935	0.317465	0.41127	0.39264
YBR286W	3 - YBR286W ... APE3 vacuolar protein catabolism aminopeptidase activity vacuole (sensu Fungi) | YBR287W	3	4	-0.18026	-0.0881	-0.2288	0.01181	-0.06051	0.01169	0.69249	0.930525	0.249255	0.835975	0.67364	0.614045	0.402575	0.413195	0.549535	0.443505	0.61736	0.52705
YBR235W	3 - YBR235W ... YBR235W biological process unknown ion transporter activity cellular component unknown | YBR236C	3	4	-0.06096	0.13953	-0.05119	-0.04288	-0.09607	-0.21896	0.69205	0.825105	0.693585	0.501315	0.71639	0.578165	0.270795	0.412035	0.336825	0.253015	0.48939	0.62522
YLL015W	3 - YLL015W ... BPT1 bilirubin transport* bilirubin transporter activity* vacuolar membrane (sensu Fungi) | YLL018C	3	4	-0.18384	0.03862	-0.0671	0.11941	-0.01982	-0.00508	0.58483	1.10634	0.482245	0.366355	0.58998	0.552605	0.167965	0.449885	0.329535	0.329975	0.66606	0.53796
YMR205C	3 - YMR205C ... PFK2 glycolysis 6-phosphofructokinase activity cytoplasm* | YMR206W	3	4	-0.11261	0.14874	0.15622	0.03477	0.13673	0.0157	0.65466	0.857815	0.705355	0.545525	0.54539	0.336695	0.479435	0.376575	0.346895	0.418005	0.59234	0.45906
YJL062W	3 - YJL062W ... LAS21 GPI anchor biosynthesis transferase activity integral to plasma membrane* | YJL062W-A	3	4	0.01456	0.02283	0.00717	-0.06176	0.15367	-0.25682	0.57842	0.764615	0.657455	0.546105	0.64169	0.547335	0.121865	0.161805	0.121635	0.460705	0.46289	0.33538
YDL183C	3 - YDL183C ... YDL183C biological process unknown molecular function unknown cellular component unknown | YDL184C	3	4	-0.20421	-0.00242	0.34502	-0.09603	0.18417	0.33965	0.59434	0.800785	0.749485	0.877565	0.75678	0.584615	-0.098185	0.312585	0.359845	0.679025	0.26127	0.34779
YEL052W	3 - YEL052W ... AFG1 biological process unknown ATPase activity mitochondrion | YEL053C	3	4	0.05079	-0.11276	0.49887	0.20675	-0.04883	-0.08325	0.38424	0.909085	0.562995	0.646805	0.72731	0.557835	0.360115	0.284645	0.357685	0.557535	0.53761	0.59152
YLR189C	3 - YLR189C ... ATG26 sterol metabolism sterol 3-beta-glucosyltransferase acytoplasm | YLR190W	3	4	0.16263	-0.12999	0.06203	-0.00902	0.14939	0.07101	0.66687	0.785275	0.725415	0.782015	0.76932	0.779565	0.430345	0.637495	0.371995	0.468335	0.57549	0.60232
YPL134C	3 - YPL134C ... ODC1 mitochondrial transport intracellular transporter activity*mitochondrion* | YPL135W	3	4	-0.18945	-0.3648	-0.05225	-0.31957	0.17664	-0.06365	0.56223	0.860885	0.447835	0.618385	0.40844	0.648255	0.027685	0.382185	0.310985	0.347305	0.33585	0.65025
YOL003C	3 - YOL003C ˜ PFA4 biological process unknown molecular function unknown | Palmitoyltransferase with autoacylation activity, required for palmitoylation of amino acid permeases containing a C-terminal Phe-Trp-Cys site; required for modification of Chs3p; member of the DHHC family of putative palmitoyltransferasesYOL004W	3	4	-0.35958	0.03972	-0.20874	-0.19887	-0.19937	-0.2422	0.61124	0.757175	0.401085	0.557905	0.65506	0.376735	0.237355	0.198985	0.225715	0.252055	0.29103	0.26974
YFL039C	3 - YFL039C ... ACT1 cell wall organization and bio structural constituent of cytoskeleactin cortical patch* | YFL040W	3	4	-0.80036	-0.11555	-0.49211	0.082	-0.13111	-0.36667	0.51789	0.444625	0.594285	0.519165	0.53194	0.353285	0.216685	0.290785	0.432255	0.214595	0.32961	0.26107
YER015W	3 - YER015W ... FAA2 lipid metabolism* long-chain-fatty-acid-CoA ligase acmitochondrion* | YER016W	3	4	-0.55769	0.17209	-0.31177	-0.16127	-0.23956	0.14235	0.3324	0.588765	0.166045	0.777095	0.2083	0.505775	0.038285	0.134615	-0.038045	0.450605	0.10443	0.42876
YNL033W	3 - YNL033W ... YNL033W biological process unknown molecular function unknown cellular component unknown | YNL034W	3	4	-0.32787	0.11779	-0.21804	0.10481	-0.52325	-0.00486	0.38772	0.601565	0.072245	0.785515	-0.01579	0.581935	0.052095	0.318625	0.051035	0.353665	0.24548	0.27126
YLR402W	3 - YLR402W ... | YLR403W	3	4	-0.16318	-0.52583	-0.48757	-0.08849	-0.21615	0.05065	0.54754	0.821065	0.032495	0.256165	0.43243	0.483305	0.277065	-0.173915	-0.228535	0.167205	0.67912	0.21249
YMR306W	3 - YMR306W ... FKS3 biological process unknown "1,3-beta-glucan synthase activity"mitochondrion | YMR307W	3	4	-0.14676	0.40795	-0.0831	0.06804	-0.2467	0.18953	0.46757	0.594705	0.292975	0.681745	0.26225	0.636015	0.271535	0.523375	0.220095	0.567105	0.2699	0.59109
YBR086C	49 - YBR086C ... IST2 response to osmotic stress molecular function unknown plasma membrane* | YBR087W	49	4	-0.0547	0.08819	0.04009	-0.00029	-0.18578	-0.04515	0.32457	0.065695	0.339785	0.295085	0.3069	0.313125	-0.014225	-0.016945	0.081635	0.206345	0.21373	0.19093
YJR121W	49 - YJR121W ... ATP2 ATP synthesis coupled proton t hydrogen-transporting ATP synthase soluble fraction* | YJR122W	49	4	0.00628	-0.02698	0.05293	0.15945	0.27098	0.0324	0.52101	0.610605	0.379575	0.259655	0.5547	0.399565	0.040415	0.225115	0.131415	0.187395	0.32696	0.26119
YDL133W	49 - YDL133W ... YDL133W biological process unknown molecular function unknown cellular component unknown | YDL134C	49	4	0.06419	-0.18656	-0.14005	-0.07075	0.0497	0.06665	0.33122	0.491145	0.231615	0.412495	0.59474	0.635445	0.230815	-0.006005	0.313105	0.247245	0.25701	0.36833
YER155C	49 - YER155C ... BEM2 cell wall organization and bio signal transducer activity* mitochondrion* | YER156C	49	4	-0.08644	0.10979	-0.06194	0.07135	-0.12606	0.02107	0.31396	0.773095	0.388645	0.468745	0.17275	0.408225	-0.053415	0.323965	0.132945	0.164685	0.30412	0.13642
YHR086W	49 - YHR086W ... NAM8 nuclear mRNA splicing, via spl RNA binding* commitment complex* | YHR086W-A	49	4	-0.1438	0.01039	0.09441	0.23906	-0.05091	-0.0613	0.30712	0.536505	0.381825	0.263505	0.16381	0.240355	-0.029615	0.048655	0.114715	0.070965	0.19425	0.41543
YNL029C	49 - YNL029C ... KTR5 cell wall organization and bio mannosyltransferase activity Golgi apparatus | YNL030W	49	4	-0.28713	-0.14613	-0.22558	-0.18058	0.06472	-0.15546	0.37614	0.656985	0.075055	0.305785	0.32406	0.276075	-0.149185	0.165255	-0.007735	0.047145	0.18488	0.20436
YGL203C	49 - YGL203C ... KEX1 protein processing carboxypeptidase D activity Golgi trans face | YGL204C	49	4	-0.13518	-0.02069	-0.04101	0.06418	-0.13805	0.09202	0.10488	-0.039315	0.286005	0.208665	0.27969	0.291445	0.422755	0.381675	0.305715	0.253015	0.42088	0.0059
YHR029C	49 - YHR029C ˜ YHI9 biological process unknown molecular function unknown | Protein of unknown function; null mutant is defective in unfolded protein response; possibly involved in a membrane regulation metabolic pathway; member of the PhzF superfamily, though most likely not involved in phenazine productionYHR030C	49	4	-0.15344	-0.02076	-0.27052	0.0782	0.08935	0.10322	0.01776	0.569595	0.216325	0.296395	0.20668	0.157655	0.216695	0.434665	0.286365	0.585965	-0.00678	0.62063
YBL074C	49 - YBL074C ... AAR2 assembly of spliceosomal tri-s molecular function unknown snRNP U5 | YBL075C	49	4	0.17071	-0.1351	0.00653	0.04959	-0.06565	0.05932	0.24271	0.525575	0.218785	0.282575	0.19167	0.555075	0.119155	0.243895	0.452185	0.127185	0.31807	0.59752
YKL005C	49 - YKL005C ... BYE1 negative regulation of transcr transcriptional elongation regulatonucleus | YKL006C-A	49	4	0.05921	-0.07679	-0.08865	-0.20289	-0.11546	0.00629	0.2079	0.215695	0.447885	0.446935	0.20662	0.365835	0.283085	0.287625	0.350085	0.384625	0.31022	0.1948
YFL018C	49 - YFL018C ... LPD1 glycine catabolism* glycine dehydrogenase (decarboxylatmitochondrial nucleoid* | YFL019C	49	4	-0.08479	-0.18894	0.01211	-0.34557	0.3083	-0.12199	0.24885	0.308865	0.036085	0.089155	0.24306	0.251925	0.383225	0.399545	0.514765	0.160625	0.66292	0.33891
YDR430C	49 - YDR430C ... CYM1 proteolysis and peptidolysis* metalloendopeptidase activity mitochondrion* | YDR431W	49	4	0.06644	-0.26994	-0.34583	-0.19062	0.021	0.02853	0.22557	0.579965	-0.023365	0.062635	0.20559	0.221305	0.362145	0.235735	0.367895	0.392325	0.63732	0.51165
YDR141C	49 - YDR141C ... DOP1 cellular morphogenesis molecular function unknown cytoplasm* | YDR142C	49	4	-0.13187	-0.19284	-0.14162	-0.13898	-0.00842	-0.08766	0.14931	0.337595	-0.111745	0.127695	-0.06265	0.299845	0.104955	0.396715	0.270665	0.307125	0.31517	0.45369
YER125W	49 - YER125W ... RSP5 endocytosis* ubiquitin-protein ligase activity cytoplasm* | YER126C	49	4	-0.0713	-0.06931	-0.18766	0.05801	-0.06762	-0.06966	0.27031	0.593985	0.197195	0.165335	0.08402	0.295045	0.154035	0.533285	0.447025	0.245805	0.6748	0.32912
YGR184C	49 - YGR184C ... UBR1 protein monoubiquitination* ubiquitin-protein ligase activity proteasome complex (sensu Eukaryota | YGR185C	49	4	0.01202	-0.04492	-0.19354	-0.06631	-0.13881	-0.08022	0.23046	0.619255	0.079925	0.052415	-0.04775	0.260385	0.241475	0.644135	0.472895	0.421325	0.62525	0.6119
YGR218W	49 - YGR218W ... CRM1 mRNA-nucleus export* protein carrier activity nucleus | YGR219W	49	4	-0.11649	-0.18254	-0.22886	0.01588	-0.16255	0.00752	0.04748	0.617625	-0.135345	-0.136535	-0.06629	0.244415	0.061445	0.496815	0.423525	0.354025	0.56007	0.47371
YGL067W	49 - YGL067W ... NPY1 NADH metabolism NAD+ diphosphatase activity cytoplasm* | YGL068W	49	4	-0.16755	-0.19044	-0.29684	-0.07619	-0.20261	-0.14697	0.18239	0.531815	0.105235	0.050175	0.04603	0.105455	0.095935	0.323205	0.109025	0.249125	0.27585	0.41695
YGL094C	49 - YGL094C ... PAN2 postreplication repair* poly(A)-specific ribonuclease activcytoplasm* | YGL095C	49	4	-0.11995	-0.1029	-0.22583	0.01928	-0.14777	-0.08619	0.26607	0.276205	0.020635	0.220765	-0.06994	0.255785	0.324095	0.390795	0.181615	0.254235	0.25008	0.34334
YJL178C	49 - YJL178C ... ATG27 vesicle organization and bioge protein kinase regulator activity membrane | YJL179W	49	4	-0.11462	-0.24365	-0.03444	-0.04202	-0.1257	-0.09245	0.33487	0.327125	0.212085	-0.157705	0.20888	0.406555	0.357255	0.415645	0.311715	0.368095	0.42576	0.34592
YNL127W	49 - YNL127W ... FAR11 cell cycle arrest in response molecular function unknown cellular component unknown | YNL128W	49	4	0.09353	-0.13945	0.09675	-0.0732	0.07014	0.07059	0.06216	0.222755	-0.015425	0.252975	-0.04848	0.175695	0.020965	0.488145	0.305725	0.425585	0.35108	0.52024
YFR019W	49 - YFR019W ... FAB1 response to stress* 1-phosphatidylinositol-3-phosphate mitochondrion* | YFR020W	49	4	-0.02904	-0.06427	-0.13761	-0.20558	0.01236	0.15189	0.09196	0.146175	-0.082285	0.169515	0.04243	0.149645	0.297555	0.497205	0.351655	0.256525	0.22714	0.46293
YGR037C	49 - YGR037C ... ACB1 fatty acid metabolism* long-chain fatty acid transporter acytoplasm* | YGR038W	49	4	-0.07804	-0.05787	-0.04003	0.0342	0.03336	0.08462	0.09924	0.389615	0.174125	0.079425	-0.09932	0.310535	0.436235	0.587995	0.424245	0.482175	0.6084	0.2583
YGL027C	49 - YGL027C ... CWH41 cell wall organization and bio mannosyl-oligosaccharide glucosidasendoplasmic reticulum membrane | YGL028C	49	4	-0.01	-0.01955	0.04015	0.0718	0.14426	0.11019	0.17033	0.363815	0.393945	0.249875	0.25489	0.295395	0.275135	0.589675	0.269365	0.106295	0.55024	0.27596
YBR182C	49 - YBR182C ... SMP1 positive regulation of transcr transcription factor activity* cytoplasm* | YBR182C-A	49	4	-0.17672	0.0615	-0.02943	-0.06002	0.04277	-0.23552	0.24396	0.675495	0.282435	0.526635	0.21195	0.221175	0.365255	0.362815	0.354165	0.588355	0.72955	0.44945
YGL167C	49 - YGL167C ... PMR1 secretory pathway* calcium-transporting ATPase activitGolgi apparatus | YGL168W	49	4	-0.07471	0.09474	-0.05774	0.24181	-0.06326	1e-05	0.46192	0.457665	0.422855	0.351185	0.36713	0.519105	0.267195	0.468255	0.277565	0.117885	0.59382	0.37835
YML021C	49 - YML021C ... UNG1 DNA repair uracil DNA N-glycosylase activity nucleus* | YML022W	49	4	0.08105	-0.11087	0.03502	0.1139	0.12088	-0.02524	0.38595	0.280665	0.401395	0.290105	0.32156	0.312565	0.291155	0.321675	0.358105	0.303325	0.51378	0.22959
YDL195W	49 - YDL195W ... SEC31 ER to Golgi transport structural molecule activity COPII vesicle coat | YDL196W	49	4	0.06068	0.04244	-0.11155	-0.04269	0.01974	-0.00308	0.54816	0.334815	0.419155	0.479815	0.27489	0.454575	0.385155	0.301455	0.416685	0.321615	0.58956	0.55814
YDL103C	49 - YDL103C ... QRI1 UDP-N-acetylglucosamine biosyn UDP-N-acetylglucosamine diphosphorycytoplasm* | YDL104C	49	4	0.10005	-0.07108	-0.13765	0.04618	0.16847	0.01378	0.39071	0.465245	0.322375	0.494675	0.26119	0.507705	0.249975	0.463465	0.375225	0.406005	0.37076	0.34789
YMR231W	49 - YMR231W ... PEP5 late endosome to vacuole trans molecular function unknown vacuolar membrane (sensu Fungi)* | YMR232W	49	4	0.02586	-0.23304	0.055	-0.03822	-0.00737	-0.07899	0.38221	0.525165	0.212495	0.340045	0.18023	0.355975	0.283135	0.461835	0.371925	0.270285	0.30501	0.50476
YIL129C	49 - YIL129C ... TAO3 cellular morphogenesis* molecular function unknown mitochondrion* | YIL130W	49	4	-0.20394	-0.21125	-0.33271	-0.17995	-0.06973	-0.08659	0.35194	0.703645	0.224455	0.299295	0.26021	0.363165	0.235805	0.498445	0.447005	0.350545	0.57725	0.45889
YJR066W	49 - YJR066W iESR cluster TOR1 meiosis* protein binding* plasma membrane* | YJR067C	49	4	-0.10782	-0.18747	-0.17284	-0.17143	0.05665	-0.06793	0.4001	0.689295	0.384305	0.261055	0.26531	0.438255	0.155855	0.494985	0.368185	0.436165	0.57184	0.48767
YKR002W	49 - YKR002W ... PAP1 mRNA-nucleus export* polynucleotide adenylyltransferase nucleoplasm* | YKR003W	49	4	0.16305	0.01009	0.05817	-0.11606	0.13893	0.16276	0.42933	0.290245	0.167175	0.358395	0.22476	0.400815	0.492855	0.282035	0.495745	0.277015	0.18213	0.38392
YGL200C	49 - YGL200C ... EMP24 ER to Golgi transport* molecular function unknown endoplasmic reticulum* | YGL201C	49	4	-0.04826	0.11682	0.01128	0.12987	0.12743	-0.21664	0.39546	0.327215	0.181305	0.201545	0.35541	0.073195	0.481705	0.209335	0.384175	0.409345	0.28892	0.51236
YOR266W	49 - YOR266W ... PNT1 inner mitochondrial membrane o molecular function unknown mitochondrial inner membrane | YOR267C	49	4	-0.09413	-0.04035	-0.0653	0.11895	-0.14147	0.28379	0.31579	0.587375	0.268345	0.611205	0.34932	0.321415	0.217885	0.482615	0.239275	0.187825	0.24772	0.57022
YOR112W	49 - YOR112W ˜ CEX1 biological process unknown molecular function unknown | Cytoplasmic component of the nuclear aminoacylation-dependent tRNA export pathway; interacts with nuclear pore component Nup116p; copurifies with tRNA export receptors Los1p and Msn5p, as well as eIF-1a and the RAN GTPase Gsp1pYOR113W	49	4	-0.16143	0.01451	-0.18368	0.02905	0.12723	0.02833	0.12709	0.218405	-0.081955	0.230865	0.06932	0.296305	0.283635	0.371095	0.255575	0.214275	0.07982	0.28162
YMR165C	49 - YMR165C ˜ PAH1 (SMP2) protein amino acid phosphoryla protein kinase activity cytoplasm | Mg<sup>2+</sup>-dependent phosphatidate (PA) phosphatase, catalyzes the dephosphorylation of PA to yield diacylglycerol and P<sub>i</sub>, responsible for de novo lipid synthesis; homologous to mammalian lipin 1YMR166C	49	4	0.03602	0.02638	-0.09813	-0.16296	-0.06389	-0.03758	0.04422	-0.104165	0.203255	0.286955	0.287	0.336905	0.143245	0.180735	0.373175	0.289445	0.33265	0.38244
YDL095W	49 - YDL095W ... PMT1 O-linked glycosylation dolichyl-phosphate-mannose-protein endoplasmic reticulum membrane | YDL096C	49	4	-0.23413	-0.0154	-0.27938	-0.14823	0.01574	-0.1891	0.22107	0.291195	0.472275	-0.097935	0.25895	0.115755	0.284515	0.204215	0.057865	0.154345	0.46517	0.21516
YDR207C	49 - YDR207C ... UME6 sporulation (sensu Fungi)* DNA binding* nucleus | YDR208W	49	4	-0.10045	-0.10533	-0.05744	-0.30281	-0.16992	-0.17092	0.30414	-0.006765	0.088665	0.423225	0.33584	0.305715	0.489015	0.271425	0.210715	0.361375	0.08152	0.2488
YNL094W	49 - YNL094W ... APP1 actin filament organization* molecular function unknown actin cortical patch* | YNL095C	49	4	-0.22316	-0.08163	0.05879	-0.16746	-0.01779	-0.3016	0.42897	0.145115	0.166195	0.211025	0.27659	0.360815	0.293005	0.194005	0.263675	0.416295	0.08045	0.32147
YBR221C	49 - YBR221C ... PDB1 pyruvate metabolism pyruvate dehydrogenase (acetyl-tranmitochondrion* | YBR221W-A	49	4	-0.40581	-0.40438	-0.20676	-0.38517	-0.08319	-0.40825	0.35393	0.522015	0.390105	-0.041515	0.2812	0.292015	-0.076265	0.138045	0.082775	0.094435	0.53776	0.20933
YAL026C	49 - YAL026C ... DRS2 processing of 20S pre-rRNA* ATPase activity* plasma membrane* | YAL027W	49	4	-0.35499	-0.07716	-0.31829	-0.07432	-0.20598	-0.23326	0.01512	0.648765	0.240075	0.005125	0.0798	0.238535	0.107465	0.405925	0.159615	0.247725	0.44884	0.03048
YEL002C	49 - YEL002C ... WBP1 N-linked glycosylation* dolichyl-diphosphooligosaccharide-pendoplasmic reticulum* | YEL003W	49	4	-0.42808	-0.2487	-0.39182	-0.03527	0.04652	-0.3119	0.08621	0.483125	0.136615	-0.008155	0.12732	0.048385	0.274825	0.324295	0.182845	0.076915	0.40525	0.31163
YGR240C	49 - YGR240C ... PFK1 glycolysis 6-phosphofructokinase activity cytoplasm* | YGR240C-A	49	4	-0.28282	-0.23937	-0.2589	0.00624	-0.09977	-0.22267	0.09016	0.305825	0.182345	-0.189405	0.13545	0.099095	0.209375	0.325265	0.339615	0.183335	0.30297	0.35361
YER178W	49 - YER178W ... PDA1 pyruvate metabolism pyruvate dehydrogenase (acetyl-tranmitochondrion* | YER179W	49	4	-0.39508	-0.33871	-0.43998	-0.27401	-0.08308	-0.48254	0.28515	0.607405	0.186275	0.183655	0.35673	0.352965	0.003025	0.189025	0.284895	0.151915	0.38118	0.54513
YML035C	49 - YML035C ... AMD1 purine nucleotide metabolism AMP deaminase activity cytoplasm | YML036W	49	4	-0.19595	-0.17958	-0.41073	-0.19189	-0.43051	-0.37083	0.44062	0.747455	0.233755	0.326035	0.25286	0.428885	0.110825	0.157585	0.260185	0.165195	0.31963	0.34737
YBR274W	49 - YBR274W ... CHK1 protein amino acid phosphoryla protein kinase activity nucleus | YBR275C	49	4	-0.49553	-0.15849	-0.22112	-0.08682	-0.16263	0.01537	0.44688	0.636055	0.407925	0.406875	0.46256	0.327365	0.160545	0.365045	0.140705	0.296785	0.57976	0.31532
YOR122C	49 - YOR122C ... PFY1 response to osmotic stress* actin monomer binding actin cap* | YOR123C	49	4	-0.17067	-0.12919	-0.29498	0.00149	0.19691	-0.18059	0.33723	0.302895	0.236175	0.219935	0.34234	0.264405	0.135845	0.277225	0.287245	0.094215	0.33928	0.2277
YIL137C	49 - YIL137C ˜ TMA108 (RBF108) proteolysis and peptidolysis metalloendopeptidase activity cytoplasm | Protein that associates with ribosomes; putative metalloproteaseYIL138C	49	4	-0.28326	-0.32647	-0.14267	-0.27835	-0.15681	-0.29871	0.29967	0.474375	0.244685	0.332175	0.4323	0.420055	0.221465	0.422585	0.333075	0.257025	0.58608	0.63425
YJL172W	49 - YJL172W ... CPS1 proteolysis and peptidolysis* Gly-X carboxypeptidase activity vacuole (sensu Fungi) | YJL173C	49	4	-0.47082	-0.29306	-0.40458	0.0108	-0.14728	-0.32942	0.36789	0.616765	0.449975	0.434475	0.33448	0.380055	0.330785	0.375155	0.448155	0.267125	0.6881	0.57826
YNR074C	49 - YNR074C ... AIF1 response to singlet oxygen* "oxidoreductase activity, acting on"nucleus* | YNR075C-A	49	4	-0.38489	-0.36877	-0.24678	-0.18693	0.03568	-0.18575	0.22948	0.576055	0.263805	0.139405	0.51759	0.258725	0.016455	0.355255	0.215645	0.282255	0.36792	0.35711
YML072C	49 - YML072C ... TCB3 biological process unknown lipid binding mitochondrion* | YML073C	49	4	-0.1722	-0.1868	-0.22341	-0.24938	-0.0799	-0.06417	0.30177	0.827265	0.381115	0.424965	0.41532	0.545405	0.053005	0.306165	0.328075	0.272495	0.46983	0.46097
YDR434W	49 - YDR434W ... GPI17 attachment of GPI anchor to pr GPI-anchor transamidase activity GPI-anchor transamidase complex | YDR435C	49	4	-0.10535	0.02657	-0.13889	0.1578	-0.19426	-0.12829	0.22049	0.601605	0.241685	0.126225	0.24828	0.258575	0.006085	0.314495	0.233375	0.219685	0.32418	0.37438
YNL257C	49 - YNL257C ... SIP3 transcription initiation from transcription cofactor activity nucleus | YNL258C	49	4	-0.12033	-0.04214	-0.20379	-0.11214	-0.17407	0.08778	0.14577	0.557885	0.125775	0.413905	0.17001	0.320645	0.069395	0.277195	0.015955	0.168655	0.0167	0.16158
YNL046W	49 - YNL046W ... YNL046W biological process unknown molecular function unknown endoplasmic reticulum | YNL047C	49	4	-0.14574	-0.03741	-0.14441	0.15081	0.11454	-0.29499	0.24757	0.256955	0.296505	0.178945	0.36178	0.383425	0.301605	0.118625	0.191985	0.160145	0.27128	0.08607
YJL167W	49 - YJL167W ... ERG20 ergosterol biosynthesis* dimethylallyltranstransferase activcytosol | YJL168C	49	4	-0.1229	-0.20029	-0.09883	-0.24286	-0.03862	-0.07639	-0.02032	0.482215	0.280805	0.244385	0.41279	0.394825	0.373895	0.410165	0.293435	0.279855	0.4425	0.01018
YDL144C	49 - YDL144C ... YDL144C biological process unknown molecular function unknown cytoplasm* | YDL145C	49	4	0.16359	-0.23959	-0.30426	-0.38815	-0.16184	-0.31499	0.17584	0.575535	-0.151995	-0.171465	0.11252	0.156435	0.186555	0.111315	0.344635	0.165755	0.57131	0.33259
YNL181W	49 - YNL181W ... YNL181W biological process unknown oxidoreductase activity* endoplasmic reticulum* | YNL182C	49	4	-0.17233	-0.12681	-0.16667	-0.13211	-0.3576	-0.21721	0.05937	0.300835	0.122385	-0.006945	0.12237	0.176625	0.134255	0.314675	0.163605	0.119105	0.20603	0.24106
YPR019W	49 - YPR019W ˜ MCM4 DNA replication initiation* chromatin binding* cytoplasm* | Essential helicase component of heterohexameric MCM2-7 complexes which bind pre-replication complexes on DNA and melt the DNA prior to replication; accumulates in the nucleus in G1; homolog of S. pombe Cdc21pYPR020W	49	4	-0.34011	-0.23001	-0.05065	-0.04328	-0.23698	-0.33787	0.21588	0.294675	0.063925	-0.029115	-0.06061	0.155135	0.041115	0.252405	0.489325	0.461595	0.38439	0.35685
YDR388W	49 - YDR388W ... RVS167 endocytosis* cytoskeletal protein binding actin cortical patch | YDR389W	49	4	0.26457	0.00599	-0.02904	-0.31964	-0.07534	0.0193	0.32716	0.319425	0.558725	0.285305	0.29494	0.195315	0.388455	0.047725	0.431415	0.515985	0.4065	0.22069
YNL019C	49 - YNL019C ... YNL019C biological process unknown molecular function unknown cellular component unknown | YNL020C	49	4	-0.51181	-0.14701	-0.02401	0.00029	-0.06266	-0.28444	0.28055	0.666715	-0.125045	0.295415	0.28773	0.792495	0.054855	0.520875	0.279255	0.484895	0.18347	0.52807
YPR181C	49 - YPR181C ... SEC23 ER to Golgi transport* GTPase activator activity cytoplasm* | YPR182W	49	4	-0.22633	0.1013	-0.12142	0.1721	-0.19742	-0.31275	0.15001	0.426205	0.600695	0.545385	0.15946	0.204575	0.360355	0.092365	0.120475	0.378845	0.32757	0.10848
YLR453C	49 - YLR453C ... RIF2 telomerase-dependent telomere telomeric DNA binding nuclear telomere cap complex | YLR454W	49	4	0.03665	0.00789	-0.10054	-0.13861	-0.1966	-0.07534	-0.0721	0.245235	-0.011925	0.411555	-0.0351	0.298715	0.378985	0.491175	0.070295	0.356645	0.33303	0.5801
YPL176C	49 - YPL176C ... TRE1 biological process unknown receptor activity plasma membrane | YPL177C	49	4	-0.61524	-0.32791	-0.23966	-0.1841	-0.39994	-0.38404	-0.02823	0.268335	0.126225	0.208855	0.08502	0.159225	0.016685	0.309355	0.225155	0.061935	0.35592	0.53114
YMR244W	11 - YMR244W ... YMR244W biological process unknown molecular function unknown cellular component unknown | YMR245W	11	6	1.07927	0.48551	0.95789	1.15874	1.25624	0.89898	0.2264	0.288935	0.423295	0.262755	0.20962	0.382005	-0.122845	0.188255	0.394975	0.629875	0.42549	0.20425
YLR307W	11 - YLR307W ... CDA1 spore wall assembly (sensu Fun chitin deacetylase activity chitosan layer of spore wall | YLR308W	11	6	0.58244	1.29299	0.90468	0.96519	0.90226	1.15099	0.18727	0.155255	0.090235	0.091475	0.20863	0.390765	0.120045	0.075875	0.285045	-0.151265	0.02043	0.13264
YBR203W	11 - YBR203W ... COS111 signal transduction molecular function unknown cellular component unknown | YBR204C	11	6	1.10657	1.14476	0.81573	1.03699	1.09598	1.2797	0.45037	0.357385	0.124305	0.150365	0.21979	0.033795	-0.034505	-0.285395	0.267315	0.552565	0.41818	0.1159
YBR150C	11 - YBR150C ... TBS1 biological process unknown molecular function unknown cytoplasm* | YBR151W	11	6	0.63689	0.66199	0.61725	0.51261	0.81878	0.74834	0.15367	0.574815	0.151775	0.157355	-0.02144	0.250595	0.418655	0.704085	0.548925	0.395455	0.59651	0.63961
YDR098C	11 - YDR098C ... GRX3 response to oxidative stress thiol-disulfide exchange intermedianucleus* | YDR099W	11	6	0.84656	0.59685	0.64412	0.67001	0.82712	0.64643	0.5518	0.165845	0.364475	0.297335	0.17626	0.434905	0.777165	0.597165	0.721315	0.554145	0.60898	0.55677
YCR099C	11 - YCR099C ... YCR099C biological process unknown molecular function unknown cellular component unknown | YCR100C	11	6	0.63067	0.66645	1.06492	0.95038	0.67749	1.18666	-0.17951	0.576585	-0.018845	0.188125	-0.10027	0.369365	0.409655	0.723755	0.514545	0.763815	0.43176	0.02484
YER187W	11 - YER187W ... YER187W biological process unknown molecular function unknown cellular component unknown | YER188C-A	11	6	0.90295	0.35238	0.66182	0.44529	0.58524	1.29693	-0.00311	0.249675	-0.299995	-0.027875	-0.2241	0.132895	0.367845	0.588745	0.354235	0.489075	0.11777	-0.21357
YOL162W	11 - YOL162W ... YOL162W transport transporter activity membrane | YOL163W	11	6	0.54597	1.0957	0.65287	0.65327	1.09099	0.69977	-0.48927	-0.547265	0.149955	-0.201385	0.05594	-0.403095	0.523615	0.657425	0.890225	0.835475	0.36779	0.67257
YCL026C-A	11 - YCL026C-A ... FRM2 negative regulation of fatty a molecular function unknown cytoplasm* | YCL026C-B	11	6	0.49943	1.26762	0.44462	0.83173	0.38539	1.06444	0.14031	0.125665	0.420395	0.234885	0.2833	0.570235	0.704635	0.451185	0.625245	0.921265	0.88075	0.48452
YCR102C	11 - YCR102C ... YCR102C biological process unknown molecular function unknown cellular component unknown | YCR102W-A	11	6	1.0629	0.83805	0.77371	0.92151	0.72721	0.73858	0.34069	0.128155	0.537805	0.137745	0.28903	0.306455	0.578015	0.864115	0.471825	-0.066745	0.33623	0.32648
YHR162W	11 - YHR162W ... YHR162W biological process unknown molecular function unknown mitochondrion | YHR163W	11	6	0.69998	0.68806	0.62993	0.93603	1.05241	0.84855	0.50147	0.137795	-0.093525	0.235495	0.1704	0.392515	0.743135	0.529675	0.585195	0.425335	0.44134	0.65295
YBR135W	11 - YBR135W ... CKS1 transcription* protein kinase activator activity cytoplasm* | YBR136W	11	6	0.80079	0.65439	0.6241	0.44036	0.96725	0.61755	0.06025	0.001235	0.329995	-0.020715	0.1682	0.197145	0.637575	0.219315	0.694955	0.630385	0.33894	0.77766
YCR101C	11 - YCR101C ... YCR101C biological process unknown molecular function unknown membrane fraction | YCR102C	11	6	0.96914	0.68992	0.95938	1.12975	0.96271	0.96719	0.19237	0.690005	0.082435	0.579265	0.19417	0.029615	0.578975	1.35098	0.966815	0.646425	1.16199	1.28664
YBL107C	11 - YBL107C ... YBL107C biological process unknown molecular function unknown cytoplasm | YBL107W-A	11	6	0.7324	0.81855	0.65824	0.73472	0.30233	0.60185	0.10482	-0.119425	0.293225	0.131025	0.3803	-0.070085	0.956105	0.428375	0.567545	0.400115	0.5179	0.29383
YGL058W	11 - YGL058W ... RAD6 ubiquitin-dependent protein ca ubiquitin conjugating enzyme activicytoplasm* | YGL059W	11	6	0.725	0.66223	0.50432	0.81127	0.49071	0.30135	0.16359	0.065235	0.161305	0.066925	0.07542	-0.003305	0.732195	0.250795	0.631175	0.378965	0.60489	0.70904
YOL163W	11 - YOL163W ... YOL163W transport transporter activity membrane | YOL164W	11	6	0.8531	0.48141	0.71081	0.94852	0.68162	0.92042	-0.01889	-0.122865	0.314315	0.084725	0.04159	0.012425	0.416015	0.497715	0.718385	1.03351	0.7428	0.65786
YER052C	11 - YER052C ... HOM3 methionine metabolism* aspartate kinase activity cytoplasm | YER053C	11	6	0.75958	0.95179	0.87331	0.97391	0.99938	0.74113	-0.04669	-0.356725	-0.017635	-0.129345	0.02068	-0.117785	1.04581	1.27006	0.876575	0.615795	0.8463	0.75008
YOR343C	11 - YOR343C ... | YOR344C	11	6	0.28458	0.69153	0.62947	0.75908	0.40202	0.66119	-0.21864	-0.145595	0.132255	0.079735	0.20344	-0.318175	0.721725	0.659405	0.580625	0.908045	0.98632	0.69167
YPR201W	11 - YPR201W ... ARR3 arsenite transport arsenite transporter activity integral to plasma membrane | YPR202W	11	6	0.31837	0.98696	0.37445	0.70162	0.44904	0.86937	-0.10119	0.178935	-0.287475	0.290805	0.01976	-0.065815	0.498475	0.608505	0.488815	1.43758	0.45165	0.64056
YGL256W	11 - YGL256W ... ADH4 fermentation "alcohol dehydrogenase activity, zin"mitochondrion | YGL257C	11	6	0.99288	0.94333	1.13706	1.08052	1.15004	0.93385	0.25741	0.307385	0.415405	0.139565	0.05878	0.160485	0.956185	1.0653	1.04655	0.910415	0.94237	1.06951
YCR037C	11 - YCR037C ... PHO87 phosphate transport inorganic phosphate transporter actmembrane | YCR038C	11	6	0.94885	1.15922	1.1185	1.00603	1.2003	1.21847	-0.05719	0.004765	0.071495	-0.233615	0.11062	-0.033685	0.174385	0.308485	0.310335	0.282485	0.38549	0.17817
YJL218W	11 - YJL218W ... YJL218W biological process unknown acetyltransferase activity cellular component unknown | YJL219W	11	6	0.83836	0.82856	1.04256	0.93741	0.93165	1.19322	-0.08955	0.056485	0.158155	-0.014615	-0.19615	0.026495	0.158025	0.595415	0.170765	0.044365	0.22329	0.5363
YJL219W	11 - YJL219W ... HXT9 hexose transport glucose transporter activity* plasma membrane | YJL220W	11	6	0.8409	0.93337	0.75578	1.11949	0.8571	0.92406	0.28804	0.156235	0.267085	0.468085	0.51555	0.034385	0.705905	0.371345	0.822515	0.512805	0.75248	-0.13854
YPL185W	11 - YPL185W ... | YPL186C	11	6	1.2067	1.33301	1.23882	0.836	0.85354	1.11043	0.29599	0.320635	0.477795	0.333715	0.32088	0.136425	0.687095	0.758015	0.527965	0.804365	0.43276	0.47117
YPR157W	11 - YPR157W ... YPR157W biological process unknown molecular function unknown cellular component unknown | YPR158W	11	6	0.81885	0.87173	0.92103	1.06074	0.64082	0.63968	0.02144	0.612065	0.354685	0.306285	0.04944	0.068125	0.302315	0.465305	-0.029375	0.747355	0.33016	0.38619
YML101C-A	#N/A	11	6	0.77388	1.14487	1.01483	1.31379	1.23279	0.8382	0.0349	0.590555	0.825425	0.456565	0.23586	0.285865	0.098595	0.176075	0.473365	0.446165	0.20848	0.90897
YHR210C	11 - YHR210C ... YHR210C biological process unknown molecular function unknown cellular component unknown | YHR211W	11	6	1.23578	1.15013	1.04151	1.02664	0.53424	1.42531	0.11211	0.351465	-0.049365	0.509165	-0.37378	-0.028445	0.219575	0.249165	-0.120025	0.628095	-0.17798	0.21935
YNL259C	11 - YNL259C ... ATX1 response to oxidative stress* copper chaperone activity cytosol | YNL260C	11	6	1.249	0.71387	0.77562	1.06127	0.91095	0.84453	0.31772	-0.605445	0.338825	0.209135	0.8109	-0.092085	0.431145	0.325145	0.491295	0.066935	0.54633	0.32947
YGL006W-A	11 - YGL006W-A ... YGL006W-A biological process unknown molecular function unknown cellular component unknown | YGL007C-A	11	6	0.54382	1.06463	0.33653	0.47317	0.61616	1.03587	0.41078	0.309255	-0.031405	0.522405	0.03149	-0.859725	0.554855	0.563825	1.0429	0.326185	0.83419	0.48373
YHR021W-A	11 - YHR021W-A ... ECM12 cell wall organization and bio molecular function unknown cellular component unknown | YHR022C	11	6	0.78652	0.65675	0.72097	0.33554	0.7655	1.05544	-0.09627	-0.059565	0.020015	0.268685	-0.22215	0.407825	0.279685	1.14908	0.877105	1.15606	0.83611	0.1557
YAL065C	11 - YAL065C ... YAL065C biological process unknown molecular function unknown cellular component unknown | YAL066W	11	6	1.28877	1.03977	1.14844	1.44453	0.78895	1.09803	-0.12589	0.334435	0.435815	-0.248215	-0.434	-0.593075	0.544235	0.199395	0.307245	0.793695	0.82456	0.68932
YAR050W	11 - YAR050W ... FLO1 flocculation (sensu Saccharomy mannose binding cell wall (sensu Fungi) | YAR053W	11	6	1.07504	1.26683	1.09702	1.06457	0.88885	0.78229	-0.18994	-0.193415	0.033335	0.130235	-0.44242	-0.429605	0.155385	-0.129155	0.513735	0.714785	0.78589	0.39827
YAR029W	11 - YAR029W ... YAR029W biological process unknown molecular function unknown cytoplasm | YAR030C	11	6	0.85151	1.04132	1.06859	0.83758	0.92036	0.76002	-0.03259	-0.056755	0.296795	0.032075	-0.63607	-1.13309	0.351505	0.592955	0.676105	0.455465	0.36828	0.65892
YDL221W	11 - YDL221W ... | YDL222C	11	6	0.79799	0.76053	0.79902	1.37511	0.79698	0.45264	-0.0674	-0.516685	0.282645	0.171715	0.41975	0.080425	0.710115	0.750675	0.479765	1.34259	0.51422	0.46998
YMR182C	11 - YMR182C ... RGM1 negative regulation of transcr RNA polymerase II transcription facnucleus | YMR182W-A	11	6	1.12494	0.98736	1.06745	1.09588	1.1473	0.82196	0.20056	-0.869545	0.227215	-0.433195	0.03685	-0.167275	0.490335	0.445935	0.398905	1.07336	0.73875	0.63931
YHR217C	11 - YHR217C | YHR218W	11	6	1.42159	1.06558	1.10931	1.0032	0.52834	0.66479	-0.07948	-0.592435	0.429195	0.617665	0.32103	0.276445	0.560725	0.440415	0.553235	0.806615	0.62605	0.38326
YLL066W-B	11 - YLL066W-B ... YLL066W-B biological process unknown molecular function unknown cellular component unknown | YLL067C	11	6	1.41403	0.98802	1.1769	1.04451	0.33025	0.66103	0.05177	-0.643385	0.590865	0.600155	0.25005	0.242675	0.296725	0.185455	0.513865	0.915425	0.60137	0.53847
YNL338W	11 - YNL338W ... | YNL339C	11	6	1.4577	0.93921	1.26584	0.90694	0.50526	0.62541	0.02677	-0.556185	0.815245	0.436135	0.41803	0.177765	0.508135	0.600275	0.590855	0.843905	0.89725	0.94957
YMR320W	11 - YMR320W ... | YMR321C	11	6	1.24093	1.26612	1.38549	1.52927	1.16315	1.08896	0.03215	0.871185	0.089445	0.298685	-0.05259	0.153275	0.239655	0.524705	0.401875	1.41644	0.82465	-0.04495
YOR192C-C	11 - YOR192C-C ... YOR192C-C biological process unknown molecular function unknown cellular component unknown | YOR193W	11	6	1.10297	0.94701	0.7985	0.78087	0.55968	1.01732	0.6765	0.244145	0.194565	0.509535	-0.33742	-0.142585	0.520495	0.241115	0.133545	0.100335	0.57735	0.26453
YJR157W	11 - YJR157W ... | YJR158W	11	6	0.92354	0.53399	0.70396	1.32386	0.15297	1.07829	-0.02619	0.229195	-0.043135	-0.362505	0.13459	0.698835	-0.189805	-0.288765	0.392715	0.294995	0.46971	0.61833
YIL170W	#N/A	11	6	1.09662	1.66337	1.55685	1.75614	1.20517	1.10079	0.31889	0.383765	0.256445	0.424195	0.66993	-0.070235	0.522305	1.17027	0.048795	1.31205	0.86916	0.2906
YBR256C	12 - YBR256C ... RIB5 riboflavin biosynthesis riboflavin synthase activity soluble fraction | YBR257W	12	7	0.58483	0.59433	0.41617	0.58424	0.72524	0.65126	0.44087	0.059785	0.109485	0.264875	0.48642	0.217005	0.296415	0.443405	0.383285	0.303895	0.16513	0.28603
YKL159C	12 - YKL159C ... RCN1 calcium-mediated signaling calcium-dependent protein serine/thcalcineurin complex | YKL160W	12	7	0.64973	0.68173	0.87775	0.59609	0.63049	0.83742	0.50442	0.064775	0.070805	0.505865	0.45492	0.202975	0.259995	0.212725	0.387165	0.197245	0.33036	0.5192
YDR348C	12 - YDR348C ... YDR348C biological process unknown molecular function unknown bud neck | YDR349C	12	7	0.7166	0.83785	0.75844	0.61141	0.74121	0.69271	0.34129	-0.046055	0.313995	-0.028515	0.10423	0.177715	0.175325	-0.109555	0.116145	-0.016205	-0.08607	0.29267
YDR268W	12 - YDR268W ... MSW1 tryptophanyl-tRNA aminoacylati tryptophan-tRNA ligase activity mitochondrion | YDR269C	12	7	0.39943	0.35678	0.68251	0.59447	0.60694	0.3954	0.23691	0.386435	0.052655	0.124215	0.39166	0.186575	0.148155	0.197095	0.074815	0.040495	0.15519	0.28479
YOL036W	12 - YOL036W ... YOL036W biological process unknown molecular function unknown cellular component unknown | YOL037C	12	7	0.56095	0.65157	0.89509	0.70055	0.68294	0.38724	0.31001	0.277845	0.419895	0.099075	0.12369	0.362675	0.146615	0.161525	0.292305	0.091035	0.27206	0.29997
YIL076W	12 - YIL076W ... SEC28 ER to Golgi transport* molecular function unknown COPI vesicle coat | YIL077C	12	7	0.72872	0.43232	0.62447	0.64704	0.42888	0.65378	0.07474	0.247435	0.142175	0.362845	0.17674	0.348775	0.393525	0.390145	0.473685	0.501425	0.23166	0.03379
YDR539W	12 - YDR539W ... YDR539W biological process unknown molecular function unknown cytoplasm | YDR540C	12	7	0.71247	0.6663	0.76827	0.77475	0.82972	0.55581	0.21065	0.475235	0.028155	0.025265	0.11583	0.277505	0.170445	0.437055	0.131145	0.344905	0.21124	0.38954
YPR011C	12 - YPR011C ... YPR011C transport transporter activity mitochondrial inner membrane | YPR012W	12	7	0.80345	0.54511	0.80761	0.8197	0.81489	0.61229	0.24543	0.269445	0.429615	-0.234925	0.20043	0.249705	0.127255	0.290525	0.191635	-0.068475	0.34919	0.46647
YOR231W	12 - YOR231W ... MKK1 protein amino acid phosphoryla MAP kinase kinase activity bud tip | YOR232W	12	7	0.83365	0.61151	0.54913	0.46311	0.79816	0.75791	0.46773	0.106225	0.350625	0.265675	0.20547	0.420275	0.136075	-0.198055	0.121285	0.213155	0.18896	0.51036
YJR152W	12 - YJR152W ... DAL5 allantoate transport allantoate transporter activity plasma membrane | YJR153W	12	7	0.64082	0.6204	0.39863	0.3416	0.60794	0.9246	0.11078	0.106445	0.173115	0.396955	0.18747	0.068905	0.405785	0.442355	0.298565	-0.053345	0.20445	0.21819
YDR305C	12 - YDR305C ... HNT2 nucleoside catabolism hydrolase activity* cytoplasm* | YDR306C	12	7	0.70781	0.53213	0.79103	0.68969	0.36563	0.58643	0.12487	0.191375	0.287285	0.554425	0.59883	0.126265	0.265155	0.195205	0.356325	0.385735	0.33471	0.38178
YER133W	12 - YER133W ... GLC7 35S primary transcript process RNA binding* nucleolus* | YER134C	12	7	0.51647	0.57606	0.66585	0.69561	0.35386	0.44048	0.20317	0.423415	0.165725	0.327895	0.15965	0.151225	0.606925	0.032135	0.251335	0.149415	-0.05994	0.15232
YBR239C	12 - YBR239C ... YBR239C biological process unknown molecular function unknown cytoplasm* | YBR240C	12	7	1.02516	0.55488	0.93544	0.54736	0.69801	0.56536	0.20911	0.183885	0.071215	0.070225	0.07928	0.190205	0.052735	-0.028025	0.227895	0.418085	-0.14492	-0.05544
YOR250C	12 - YOR250C ... CLP1 mRNA polyadenylylation* RNA binding mRNA cleavage factor complex | YOR251C	12	7	0.78243	0.35848	0.64409	0.8615	0.92798	0.83948	0.09808	0.394725	-0.027235	0.280835	-0.01389	0.409745	0.131835	0.344835	0.451265	0.369105	0.03303	0.04619
YLR245C	12 - YLR245C ... CDD1 cytidine catabolism* cytidine deaminase activity cytoplasm* | YLR246W	12	7	0.59139	0.46675	0.82848	0.55161	1.21711	0.63917	0.40968	-0.070585	0.098455	0.322165	0.49699	0.266665	0.194955	0.047695	0.051015	0.533505	0.19626	0.60586
YML016C	12 - YML016C ... PPZ1 sodium ion homeostasis protein serine/threonine phosphatascytoplasm* | YML017W	12	7	0.61647	0.66324	0.54179	0.62778	0.62229	0.62837	-0.02387	0.232875	0.260975	0.096495	0.14916	0.324365	0.264325	0.314735	0.413205	0.347865	0.42577	0.54665
YPR045C	12 - YPR045C ... YPR045C biological process unknown molecular function unknown nucleus | YPR046W	12	7	0.45012	0.63073	0.50253	0.43462	0.58378	0.69656	0.24334	0.277995	0.379475	0.130655	0.05537	0.390995	0.333445	0.539615	0.372055	0.298735	0.29103	0.34734
YLR456W	12 - YLR456W ... YLR456W biological process unknown molecular function unknown cellular component unknown | YLR457C	12	7	0.73401	0.45651	0.54472	0.4159	0.85083	1.23146	0.12693	0.120085	-0.032485	0.236735	0.10469	0.088075	0.246105	0.381475	-0.091985	0.063755	0.04876	0.23957
YPR139C	12 - YPR139C ... VPS66 protein-vacuolar targeting molecular function unknown cytoplasm | YPR140W	12	7	0.47247	0.47851	0.54211	0.56444	0.37212	0.40265	0.13676	-0.107145	0.484885	0.131535	0.48098	0.133135	0.124795	0.090545	0.261725	0.084475	0.22519	0.11649
YLR381W	12 - YLR381W ... CTF3 chromosome segregation protein binding condensed nuclear chromosome kineto | YLR382C	12	7	0.40352	0.48651	0.5433	0.49548	0.41791	0.48154	0.25092	0.318915	0.050135	0.236365	0.00011	0.082295	-0.050705	0.201815	0.135995	0.336175	0.16016	0.47465
YGL073W	12 - YGL073W ... HSF1 regulation of transcription fr transcription factor activity nucleus* | YGL074C	12	7	0.70769	0.57208	0.57063	0.22131	0.42883	0.87076	0.04181	-0.122315	0.247795	0.223715	0.24154	0.212805	0.359985	0.029495	0.172585	0.028375	0.18814	0.0557
YEL056W	12 - YEL056W ... HAT2 chromatin silencing at telomer H3/H4 histone acetyltransferase actcytoplasm* | YEL057C	12	7	0.40341	0.37148	0.70045	0.42311	0.59898	0.35879	0.18423	0.178275	-0.228555	-0.132945	-0.07463	0.176605	0.303145	0.214175	0.131885	0.104595	0.2776	0.05065
YMR024W	12 - YMR024W ... MRPL3 protein biosynthesis structural constituent of ribosome mitochondrial large ribosomal subun | YMR025W	12	7	0.55727	0.33017	0.30789	0.34072	0.636	0.54089	0.11668	0.348845	-0.122015	-0.163635	0.09807	-0.048285	0.089645	0.112065	0.287335	0.131835	0.25085	0.16629
YNL331C	12 - YNL331C ... AAD14 aldehyde metabolism aryl-alcohol dehydrogenase activitycellular component unknown | YNL332W	12	7	0.31559	0.33364	0.50919	0.4623	0.60737	0.66853	0.06371	0.176105	0.031835	0.177275	0.13846	0.174775	0.162775	0.394155	0.074355	0.077875	0.41151	-0.07311
YDR067C	12 - YDR067C ˜ OCA6 biological process unknown molecular function unknown | Cytoplasmic protein required for replication of Brome mosaic virus in S. cerevisiae, which is a model system for studying positive-strand RNA virus replication; null mutation confers sensitivity to tunicamycin and DTTYDR068W	12	7	0.29285	0.38447	0.55145	0.59217	0.35727	0.48782	0.21469	0.254245	0.246395	0.150175	0.02408	0.193545	0.066315	0.143195	0.234265	0.404605	0.19379	-0.35387
YKL170W	12 - YKL170W ... MRPL38 protein biosynthesis structural constituent of ribosome mitochondrial large ribosomal subun | YKL171W	12	7	0.7585	0.48727	0.80106	0.23192	0.7665	0.17874	0.25684	-0.030875	0.026685	0.026935	0.44024	0.057245	-0.001555	-0.179515	-0.058985	0.074875	0.41635	0.00768
YIL082W-A	12 - YIL082W-A YIL082W-A ò TRANSPOSABLE TY ELEMENTYJL020W-A	12	7	0.70951	0.51476	0.8757	0.42021	0.13095	0.49703	0.03651	-0.019215	0.095535	0.296705	0.00973	0.205375	0.402975	0.399305	0.283625	0.113485	0.24302	0.27356
YIL026C	12 - YIL026C ... IRR1 mitotic sister chromatid cohes protein binding nuclear cohesin complex | YIL027C	12	7	0.75444	0.62765	0.66814	0.53462	0.62382	0.6327	0.06893	0.020415	0.254665	0.064385	-0.11811	0.279605	0.239525	0.342065	0.190715	0.226645	0.24888	0.11059
YOR131C	12 - YOR131C ... YOR131C biological process unknown molecular function unknown cytoplasm* | YOR132W	12	7	0.54003	0.53487	0.8833	0.72334	0.55229	0.49835	0.33796	-0.313325	0.052335	0.146425	0.27805	-0.014355	0.394445	0.039455	0.113905	0.153325	-0.00416	0.34427
YDR047W	12 - YDR047W ... HEM12 heme biosynthesis uroporphyrinogen decarboxylase acticytoplasm* | YDR048C	12	7	0.69352	0.489	0.77196	0.54712	0.97059	0.27495	0.13587	0.214275	-0.115915	-0.211165	-0.06959	0.006505	0.135385	0.240305	0.339755	0.174895	0.30574	0.47393
YGL017W	12 - YGL017W ... ATE1 protein modification* arginyltransferase activity cytoplasm | YGL018C	12	7	0.59877	0.43385	0.49377	0.54977	0.65927	0.24475	0.1661	0.244855	0.078235	0.053545	0.12218	0.312255	0.186295	0.587695	0.598405	0.490415	0.47921	0.59893
YOR334W	12 - YOR334W ... MRS2 mitochondrial magnesium ion tr magnesium ion transporter activity mitochondrial inner membrane | YOR335C	12	7	0.35265	0.60626	0.65249	0.26723	0.36398	0.4566	0.26188	-0.038505	0.249215	0.292315	0.12837	0.081565	0.485805	0.240115	0.137605	0.566505	0.44659	0.4265
YKL204W	12 - YKL204W ... EAP1 negative regulation of transla eukaryotic initiation factor 4E binmRNA cap complex | YKL205W	12	7	0.68238	0.56027	0.52435	0.05295	0.77848	0.63362	0.13511	-0.294405	0.270835	0.275875	0.09673	0.142715	0.511955	0.148145	0.309665	0.155435	0.32989	0.49799
YDR132C	12 - YDR132C ... YDR132C biological process unknown molecular function unknown cytoplasm* | YDR133C	12	7	0.79001	0.57737	0.60123	0.86071	0.74804	0.86023	0.04396	0.256345	0.127735	0.108035	-0.15833	0.198705	0.182835	0.445785	0.110145	0.467585	0.08882	0.30607
YER068C-A	12 - YER068C-A ˜ Dubious Dubious open reading frame unlikely to encode a functional protein, based on available experimental and comparative sequence dataYER076W-A	12	7	0.54204	0.46369	0.57582	0.56232	0.96272	0.43688	0.46311	-0.093635	0.071965	0.241605	-0.00555	0.044755	0.504025	0.424455	0.388415	-0.032295	0.37052	0.45209
YGR247W	5 - YGR247W ... CPD1 meiosis* "2',3'-cyclic-nucleotide 3'-phosphod"clathrin-coated vesicle | YGR248W	5	8	0.90118	0.82141	0.87519	0.91809	0.80485	0.63464	0.82806	1.57126	0.726135	0.501055	0.67007	0.594895	0.027395	0.133285	0.297725	0.171295	0.52875	0.47817
YER135C	5 - YER135C ... | YER136W	5	8	0.61371	0.86642	0.72518	0.40619	1.51349	0.74868	0.59689	1.0549	1.24188	0.679515	0.94039	0.937635	0.161645	0.358555	-0.278135	0.041645	-0.06054	0.3312
YCR097W	5 - YCR097W ... HMRA1 regulation of transcription, m transcription corepressor activity nucleus | YCR097W-A	5	8	1.1958	0.64527	0.88974	1.03117	1.19971	0.99456	0.83328	0.024075	1.22884	1.27136	1.12242	0.790635	0.537605	-0.090455	0.490585	0.393165	0.03353	0.54114
YML087C	5 - YML087C ˜ AIM33 biological process unknown molecular function unknown | Putative protein of unknown function, highly conserved across species and orthologous to human CYB5R4; null mutant displays reduced frequency of mitochondrial genome lossYML088W	5	8	1.0626	1.13785	1.34897	1.29098	1.17872	1.10665	1.12572	1.13626	0.705245	1.43798	1.09959	0.958475	0.113375	0.167135	0.023255	0.602995	0.08895	0.2826
YFL060C	5 - YFL060C ... SNO3 thiamin biosynthesis* molecular function unknown cellular component unknown | YFL061W	5	8	0.25684	0.99406	0.9408	0.83825	0.58873	1.21281	0.85089	1.07218	0.621305	1.26284	0.6037	1.05533	0.009645	0.295895	0.127035	-0.010605	0.25598	0.1286
YDL218W	5 - YDL218W ... YDL218W biological process unknown molecular function unknown cytoplasm | YDL219W	5	8	0.34736	0.77024	0.2226	0.49726	0.91282	0.92117	1.08294	0.946955	0.634995	1.21169	0.73623	0.695105	-0.217945	0.318795	0.120145	0.416835	0.13216	0.5678
YGL226W	5 - YGL226W ˜ MTC3 biological process unknown molecular function unknown | Protein of unknown function; green fluorescent protein (GFP)-fusion protein localizes to the mitochondrion; mtc3 is synthetically sick with cdc13-1YGL227W	5	8	0.76615	0.38969	1.19454	0.5458	0.85607	0.3139	1.3582	1.17971	1.26784	1.24704	1.34936	0.961705	-0.035085	-0.167885	0.115635	-0.098175	-0.02731	0.08536
YPL015C	5 - YPL015C ... HST2 chromatin silencing at telomer NAD-dependent histone deacetylase acytoplasm | YPL016W	5	8	1.0417	1.14892	1.50056	0.93018	1.15328	0.56646	1.2065	1.24944	1.40884	0.994365	1.58653	0.570255	0.019585	0.057685	0.228815	0.007745	0.47764	0.03632
YDR034C-A	5 - YDR034C-A ... YDR034C-A biological process unknown molecular function unknown cellular component unknown | YDR034W-B	5	8	1.34234	1.04475	1.16258	0.80106	1.06697	0.8793	1.39657	1.39308	1.38617	1.43498	1.49405	0.552575	-0.266555	-0.381465	0.142175	0.457955	0.42215	-0.22603
YNR064C	5 - YNR064C ... YNR064C response to toxin epoxide hydrolase activity soluble fraction | YNR065C	5	8	0.25695	1.39276	0.67877	0.70509	0.97335	0.73159	1.31133	1.15772	0.675065	1.38268	1.16695	1.17674	0.181935	-0.064035	0.042895	0.763995	-0.01157	0.02836
YGR045C	5 - YGR045C ... YGR045C biological process unknown molecular function unknown cellular component unknown | YGR046W	5	8	0.626	1.26632	1.1004	1.50776	1.23368	1.12838	1.10248	1.33824	1.18588	1.31546	0.54672	1.0195	0.014725	-0.296605	-0.009705	0.107545	0.06522	0.27548
YOL151W	5 - YOL151W iESR cluster GRE2 response to stress oxidoreductase activity* cytoplasm* | YOL152W	5	8	0.6125	0.5171	0.30508	0.70985	1.09611	0.58464	1.17857	1.07332	0.923215	0.726625	1.10295	1.04018	-1.04591	-0.811535	-0.577565	-0.196245	-0.4554	-0.41928
YOR065W	5 - YOR065W ... CYT1 mitochondrial electron transpo "electron transporter, transferring"mitochondrial inner membrane* | YOR066W	5	8	1.36311	1.12015	1.41444	1.00923	1.22782	1.17943	0.88699	0.524365	0.997515	0.822065	1.14131	0.887905	0.103685	-0.547995	-0.400445	0.247085	-0.26377	-0.46049
YIL029C	5 - YIL029C ... YIL029C biological process unknown molecular function unknown cellular component unknown | YIL029W-A	5	8	1.35647	1.10274	1.07596	1.38211	1.46155	1.61753	1.04407	1.49775	1.05431	1.35516	1.26931	0.883065	-0.330675	-0.369625	-0.533515	0.019275	-0.34156	-0.05997
YOR062C	5 - YOR062C ... YOR062C biological process unknown molecular function unknown cytoplasm* | YOR063W	5	8	1.12394	0.80533	1.1744	1.25534	1.06211	1.5087	0.82308	1.1807	0.662595	0.974005	0.41356	0.646825	-0.759135	-0.077845	-0.154495	-0.377025	-0.33657	-0.41314
YJR128W	5 - YJR128W ... | YJR129C	5	8	0.61175	1.82	0.78565	1.39489	1.40584	0.91842	0.38328	0.660065	0.484495	0.085735	0.43697	0.957735	-0.495785	-0.077365	-0.165975	1.19386	-0.34116	0.31815
YMR256C	5 - YMR256C ... COX7 aerobic respiration* cytochrome-c oxidase activity respiratory chain complex IV (sensu | YMR257C	5	8	0.77126	0.69938	1.07915	0.87704	0.61968	0.51705	0.73983	0.467505	0.961665	0.749785	0.81844	0.568385	-0.257425	-0.387455	-0.224775	-0.297785	-0.47561	-0.39178
YNL193W	5 - YNL193W ... YNL193W biological process unknown molecular function unknown cellular component unknown | YNL194C	5	8	0.78615	0.55901	0.6433	1.05846	0.55725	0.76093	0.55054	1.06832	0.648585	0.786265	0.46661	0.785555	-0.181545	0.198105	-0.082865	0.056525	-0.34594	0.03437
YCR018C-A	5 - YCR018C-A ... | YCR019W	5	8	1.32369	0.43047	0.98376	0.64205	1.17804	0.27793	1.16364	1.02727	1.03858	0.322345	0.67611	0.406795	0.104375	-0.058465	0.470255	0.316745	0.15366	0.18889
YER091C-A	5 - YER091C-A ... | YER092W	5	8	0.36507	1.18263	0.8673	0.85502	0.5537	0.64622	0.64225	0.708065	1.25666	0.503625	0.77131	1.42362	-0.124835	0.393935	0.029305	0.343485	-0.09138	-0.2318
YML101C	5 - YML101C ... CUE4 biological process unknown molecular function unknown cytoplasm* | YML102W	5	8	0.96582	0.85818	1.0078	0.74767	1.15993	0.49625	0.65767	0.604225	0.811265	0.876365	0.85889	0.612005	-0.130875	-0.223475	0.104125	-0.118385	0.16786	0.20173
YCL067C	5 - YCL067C ... HMLALPHA2 regulation of transcription fr transcription corepressor activity nucleus | YCL068C	5	8	1.10842	0.6411	1.01131	0.83927	0.0975	0.76226	0.68196	-0.146405	1.18298	0.471495	1.16909	0.354275	0.260275	0.023255	0.320455	-0.018075	-0.29644	-0.18675
YJR022W	5 - YJR022W ... LSM8 nuclear mRNA splicing, via spl RNA binding nucleus* | YJR023C	5	8	1.05051	1.25301	1.23617	1.18719	0.94829	0.88593	0.19581	0.290725	0.880275	0.007855	1.04376	0.264235	0.310115	-0.136365	0.066375	0.135135	0.16079	-0.00193
YLL055W	5 - YLL055W ˜ YCT1 biological process unknown ion transporter activity | High-affinity cysteine-specific transporter with similarity to the Dal5p family of transporters; green fluorescent protein (GFP)-fusion protein localizes to the endoplasmic reticulum; YCT1 is not an essential geneYLL056C	5	8	0.66909	0.89285	0.73665	1.04608	0.99671	1.03588	0.7466	0.708335	0.565565	0.614395	0.39835	0.415815	-0.390385	-0.135405	-0.250645	0.378115	0.16016	0.48269
YLR038C	5 - YLR038C ... COX12 cytochrome c oxidase complex a cytochrome-c oxidase activity respiratory chain complex IV (sensu | YLR039C	5	8	0.92648	0.87861	1.06165	0.76193	1.08997	0.79059	0.45347	0.222385	0.647435	0.625435	0.76823	0.758965	0.009535	-0.080905	-0.034195	-0.153645	-0.08465	-0.3661
YMR272C	5 - YMR272C ... SCS7 fatty acid metabolism oxidoreductase activity endoplasmic reticulum | YMR272W-B	5	8	0.736	1.099	0.99255	0.5377	0.98536	0.94678	0.70189	0.899585	0.653015	0.493515	0.67217	0.528955	-0.106035	-0.112245	-0.017975	0.205605	0.00685	-0.00903
YKL148C	5 - YKL148C ... SDH1 tricarboxylic acid cycle* succinate dehydrogenase (ubiquinonerespiratory chain complex II (sensu | YKL149C	5	8	0.80112	0.6546	0.81885	0.90288	0.93453	0.76331	0.74649	1.22681	0.747455	0.645235	0.64449	0.886625	-0.558475	-0.457025	-0.337655	0.461675	0.06214	-0.37377
YPR066W	5 - YPR066W ... UBA3 protein neddylation NEDD8 activating enzyme activity cytoplasm | YPR067W	5	8	0.63454	0.46092	0.79122	0.9259	0.74214	1.13726	0.69249	1.09896	0.088595	0.810465	0.63153	0.888475	0.016335	0.339175	-0.387505	0.131505	-0.26196	-0.21814
YHR079C-A	5 - YHR079C-A ... SAE3 meiotic recombination* molecular function unknown condensed nuclear chromosome | YHR080C	5	8	0.54832	1.00665	1.16555	0.80235	0.97626	0.95072	0.66911	0.606405	0.398005	0.375355	1.33686	1.39962	0.118425	-0.680215	0.761835	-0.204085	0.50778	-0.10227
YAR061W	#N/A	5	8	0.77881	1.03451	0.93929	1.00998	0.94183	1.02287	0.40737	0.858685	0.533915	0.440045	0.22927	0.488945	0.343425	-0.303935	0.193955	0.560135	-0.21673	-0.4524
YCL047C	5 - YCL047C ... YCL047C biological process unknown molecular function unknown cellular component unknown | YCL048W	5	8	1.24964	1.45718	1.46919	1.40113	1.3312	1.06283	1.10534	0.731075	1.02835	0.890885	0.76423	0.895425	0.216295	0.145945	0.223645	0.286825	-0.03288	0.11435
YOL081W	5 - YOL081W ... IRA2 Ras protein signal transductio Ras GTPase activator activity cytoplasm* | YOL082W	5	8	1.28984	1.41979	1.4049	1.67214	0.74366	1.04165	1.07953	1.18884	0.948215	1.02609	0.77558	1.00477	-0.005215	0.070955	0.276115	0.520395	0.25933	0.36962
YDL123W	5 - YDL123W ... SNA4 biological process unknown molecular function unknown vacuolar membrane (sensu Fungi) | YDL124W	5	8	0.63534	0.92716	0.82304	0.72038	1.07423	0.24308	1.45261	0.666895	1.34984	1.09896	1.47349	1.23649	0.025025	-0.248625	0.351255	0.480505	0.31245	0.38637
YML083C	5 - YML083C ... YML083C biological process unknown molecular function unknown cellular component unknown | YML084W	5	8	0.23828	0.9098	0.44323	0.5819	0.5344	0.66546	0.96951	1.05459	0.673295	1.28109	0.99483	1.60997	0.021495	0.382575	0.318215	0.264665	0.43526	-0.09187
YIR020C	5 - YIR020C | YIR020C-B	5	8	0.71583	0.96892	0.60462	0.85803	0.89732	0.80235	1.38168	1.47975	1.14792	1.4751	1.50067	0.871085	-0.180705	-0.039165	-0.156595	0.471075	0.05036	0.57425
YGR009C	7 - YGR009C ... SEC9 vesicle fusion* t-SNARE activity membrane | YGR010W	7	8	0.69244	0.86764	0.59407	0.83207	0.11916	0.33999	0.41001	0.268565	0.999495	0.675425	0.99026	0.505545	0.204335	0.138665	0.034495	-0.022105	-0.20164	-0.25716
YGR230W	7 - YGR230W ... BNS1 meiosis molecular function unknown cellular component unknown | YGR231C	7	8	0.55775	0.77648	1.12609	0.47439	0.98762	0.59513	0.404	0.221325	0.606615	0.411195	0.64113	0.216175	-0.291355	-0.472425	-0.131565	-0.427515	-0.43404	-0.13914
YIL156W-B	7 - YIL156W-B | YIL157C	7	8	0.44368	0.71992	0.61666	0.69546	0.66032	0.48192	0.63678	0.441315	0.848655	0.256485	0.8061	0.638915	0.046135	0.082365	0.238935	0.191515	-0.07837	0.51834
YKR074W	7 - YKR074W ˜ AIM29 biological process unknown molecular function unknown | Putative protein of unknown function; epitope-tagged protein localizes to the cytoplasm; YKR074W is not an essential gene; null mutant displays elevated frequency of mitochondrial genome lossYKR075C	7	8	0.76738	0.6863	0.58376	0.56231	0.86332	0.43964	0.66859	0.187395	0.534405	0.637235	0.72747	0.641615	0.464975	-0.116865	0.097555	0.345245	0.11378	0.15718
YDL159W	7 - YDL159W ... STE7 protein amino acid phosphoryla MAP kinase kinase activity cytoplasm* | YDL159W-A	7	8	0.85951	0.51637	0.63417	0.60468	0.66044	0.82334	0.53532	0.538285	0.490485	0.364415	0.51956	0.617805	0.037265	0.114885	0.338235	0.256755	-0.07802	0.20982
YNR032W	7 - YNR032W ... PPG1 protein amino acid dephosphory protein phosphatase type 2A activitcytoplasm* | YNR033W	7	8	0.6857	0.43316	0.72417	0.72749	0.59853	0.49681	0.4202	0.617955	0.367875	0.435455	0.34374	0.437445	0.146835	0.101065	0.213765	0.320275	-0.1382	0.30736
YER008C	7 - YER008C ... SEC3 cytokinesis* protein binding exocyst* | YER009W	7	8	0.27691	0.59318	0.43745	0.3944	0.17051	0.52465	0.17716	0.405295	0.772125	0.575505	0.61919	0.620285	0.076845	0.141635	0.208005	0.004165	0.05881	0.1207
YKR100C	7 - YKR100C ... SKG1 cell wall organization and bio molecular function unknown bud tip* | YKR101W	7	8	0.1631	0.56112	0.5373	0.52757	0.42357	0.42334	0.29934	0.503725	0.407305	0.468915	0.46923	0.241035	0.038345	0.185685	-0.051565	0.045095	0.32913	0.04267
YNL084C	7 - YNL084C ... END3 endocytosis* "protein binding, bridging" actin cortical patch | YNL085W	7	8	0.48548	0.26217	0.46572	0.2934	0.3824	0.47929	0.53911	0.293595	0.299845	0.572905	0.49853	0.346465	0.168045	0.154005	0.202775	0.083555	0.23247	0.03861
YDR016C	7 - YDR016C ... DAD1 mitotic spindle organization a structural constituent of cytoskelecondensed nuclear chromosome kineto | YDR017C	7	8	0.42707	0.26911	0.51291	0.49954	0.5454	0.41972	0.63464	0.106605	0.344495	0.515295	0.74101	0.363625	0.217505	0.072805	0.212575	-0.081935	-0.22	0.03064
YBL021C	7 - YBL021C ... HAP3 transcription* transcriptional activator activity nucleus* | YBL022C	7	8	0.58317	0.65818	0.71814	0.57264	0.86028	0.60182	0.06724	0.229845	0.535765	0.180295	0.43672	0.029305	0.297905	-0.071335	-0.142205	-0.104265	0.0791	-0.24322
YPR073C	7 - YPR073C ... LTP1 protein amino acid dephosphory protein tyrosine phosphatase activicytoplasm* | YPR074C	7	8	0.6651	0.63229	0.6636	0.7595	0.4359	0.84375	-0.01199	0.234035	0.282585	0.396275	0.47137	0.273035	0.207205	-0.108155	0.155325	0.033705	0.07027	-0.24132
YER044C	7 - YER044C ... ERG28 ergosterol biosynthesis "protein binding, bridging" endoplasmic reticulum membrane | YER044C-A	7	8	0.54238	0.82345	0.60147	0.77943	0.77366	0.37831	0.67508	0.461825	0.309115	0.447865	0.48251	0.461995	-0.152505	-0.079305	0.097945	0.434275	-0.13804	0.19136
YER134C	7 - YER134C ... YER134C biological process unknown molecular function unknown cytoplasm* | YER135C	7	8	0.58615	0.48343	0.72954	0.39028	0.78511	0.45316	0.48622	0.539565	0.219295	0.274095	0.42921	0.317915	-0.108425	0.131185	0.096735	0.051205	0.32388	0.22504
YMR222C	7 - YMR222C ... FSH2 biological process unknown serine hydrolase activity cytoplasm | YMR223W	7	8	0.70846	0.34884	0.61121	0.78089	0.69353	0.55715	0.57075	0.605845	0.151805	0.280355	0.23166	0.363825	0.043885	-0.172295	0.038455	0.015925	0.05502	0.39006
YJL134W	7 - YJL134W ... LCB3 sphingolipid biosynthesis* sphingosine-1-phosphate phosphataseendoplasmic reticulum | YJL135W	7	8	0.68754	0.88635	0.96344	0.87391	1.1761	0.5984	0.26157	0.521305	0.630195	0.034875	0.2162	0.326435	-0.136475	-0.204765	-0.145995	-0.097445	0.04908	0.19082
YPR007C	7 - YPR007C ... REC8 meiosis* binding "condensed nuclear chromosome, peric" | YPR008W	7	8	0.66683	0.78554	0.74905	0.80522	0.60535	0.73369	0.42039	0.514595	0.164875	0.512185	0.22163	0.359595	0.030805	-0.096355	-0.143245	-0.023065	0.02931	-0.1397
YDR295C	7 - YDR295C ... HDA2 regulation of transcription, D histone deacetylase activity nucleus* | YDR296W	7	8	0.57447	0.82674	0.57032	0.66682	0.49366	0.62099	0.12618	-0.013065	0.645945	0.577245	0.45845	0.174125	0.308565	0.212855	0.212445	0.004515	-0.09668	0.06718
YDR054C	7 - YDR054C ... CDC34 G1/S transition of mitotic cel ubiquitin-protein ligase activity* cytoplasm* | YDR055W	7	8	0.56903	0.87399	0.70903	0.51241	0.38494	0.80481	-0.0179	0.261885	0.230975	0.553885	0.37429	0.404995	0.570175	0.150905	0.289415	0.220885	0.1067	0.02914
YNL051W	7 - YNL051W ... COG5 intra-Golgi transport molecular function unknown Golgi transport complex | YNL052W	7	8	0.51048	0.53473	0.45734	0.44618	0.33294	0.4582	0.13513	0.085065	0.277965	0.471045	0.27799	0.528825	0.132025	0.141205	0.259715	0.170635	0.08629	-0.05593
YBR211C	7 - YBR211C ... AME1 attachment of spindle microtub molecular function unknown spindle pole body* | YBR212W	7	8	0.67746	0.45925	0.47875	0.30001	0.44893	0.64602	0.42593	0.290245	0.347885	0.549625	0.3526	0.247855	0.045385	0.055405	-0.038955	0.116885	-0.12704	-0.19576
YML081C-A	7 - YML081C-A ... ATP18 ATP synthesis coupled proton t hydrogen-transporting ATP synthase proton-transporting ATP synthase co | YML081W	7	8	0.71679	0.52329	0.64318	0.4825	0.74376	0.31064	0.53466	-0.040315	0.236905	0.260595	0.71544	0.149375	0.286345	0.006805	0.118515	-0.050355	0.29615	-0.06977
YPR191W	7 - YPR191W ... QCR2 aerobic respiration* ubiquinol-cytochrome-c reductase acmitochondrion* | YPR192W	7	8	0.54256	0.07679	0.46643	0.46676	0.6683	0.38079	0.56217	0.297705	0.069715	0.225225	0.45332	0.445065	0.045715	-0.119245	-0.091615	0.085455	0.08742	0.11611
YMR017W	7 - YMR017W ... SPO20 spore wall assembly (sensu Fun t-SNARE activity prospore membrane | YMR018W	7	8	0.40851	0.56519	0.53049	0.47441	0.43945	0.38596	0.32275	0.261305	0.507815	0.343485	0.4346	0.829845	0.111415	0.146695	-0.239435	0.176125	-0.01939	-0.09276
YLR390W	7 - YLR390W ... ECM19 cell wall organization and bio molecular function unknown cellular component unknown | YLR390W-A	7	8	0.3889	0.04704	0.69591	0.51225	0.47577	0.46981	0.31037	0.314585	0.635635	0.594155	0.55591	0.350595	0.047905	-0.361725	0.012665	-0.104575	0.09819	-0.09695
YGR076C	7 - YGR076C ... MRPL25 protein biosynthesis structural constituent of ribosome mitochondrial large ribosomal subun | YGR077C	7	8	0.59128	0.4615	0.76377	0.40308	0.83038	0.62987	0.77183	0.153965	0.345285	0.569725	0.96204	0.487175	0.259885	0.002725	-0.015115	0.006995	0.36452	-0.01364
YGR206W	7 - YGR206W ˜ MVB12 biological process unknown molecular function unknown | ESCRT-I subunit required to stabilize oligomers of the ESCRT-I core complex (Stp22p, Vps28p, Srn2p), which is involved in ubiquitin-dependent sorting of proteins into the endosome; deletion mutant is sensitive to rapamycin and nystatinYGR207C	7	8	0.57907	0.75472	0.83721	0.43784	0.40898	0.72419	1.02746	0.563345	0.721725	0.831085	0.63667	0.458025	-0.077805	0.141305	0.031065	0.383275	-0.04741	0.21239
YGL098W	7 - YGL098W ... USE1 retrograde transport, Golgi to SNAP receptor activity endoplasmic reticulum | YGL099W	7	8	0.63981	0.4276	0.30329	0.38058	0.33319	0.65153	0.65661	0.373825	0.443275	0.568105	0.68066	0.695095	0.292245	-0.196575	0.261765	0.059685	0.16177	-0.00849
YDR197W	7 - YDR197W ... CBS2 protein biosynthesis molecular function unknown mitochondrial inner membrane | YDR198C	7	8	0.68192	0.52293	0.41848	0.48679	0.91475	0.84206	0.58332	0.498875	0.274795	0.746675	0.53383	0.579745	-0.085985	0.134555	-0.033625	0.271695	0.05946	0.32268
YGR107W	7 - YGR107W ... | YGR108W	7	8	0.06727	0.91368	0.4472	0.36187	0.5412	0.64053	0.23786	0.320455	0.280475	0.763695	0.0555	0.396335	-0.067895	0.111525	0.002205	0.046665	-0.00638	-0.1481
YDL139C	7 - YDL139C ... SCM3 biological process unknown molecular function unknown cytoplasm* | YDL140C	7	8	0.6294	0.73183	0.39414	0.75651	0.31375	0.94093	0.17027	-0.076575	0.771865	0.246255	0.63909	0.366225	0.246255	0.190615	0.168525	-0.184705	-0.20828	-0.44578
YDR381C-A	7 - YDR381C-A ... YDR381C-A biological process unknown molecular function unknown cellular component unknown | YDR381W	7	8	0.77127	0.59143	0.66394	0.6715	0.33891	0.62109	0.32558	0.360535	0.640805	0.269685	0.71679	0.371005	0.342015	-0.148595	0.252735	-0.120305	-0.28423	0.23983
YIR024C	7 - YIR024C ... YIR024C biological process unknown molecular function unknown mitochondrion | YIR025W	7	8	0.67348	0.31926	0.63238	0.62413	0.54377	0.8727	0.24945	0.246095	0.502455	0.794705	0.95025	0.319975	0.279735	0.067095	0.090905	-0.018515	-0.28453	0.07982
YLL009C	7 - YLL009C ... COX17 cytochrome c oxidase complex a thioredoxin peroxidase activity* cytosol* | YLL010C	7	8	0.78892	0.84982	0.82979	0.6933	0.21993	0.71569	0.27188	0.093845	0.833675	0.677295	0.86625	0.264935	0.601105	-0.102905	0.383675	-0.174265	0.08668	-0.19945
YLR054C	7 - YLR054C ... OSW2 spore wall assembly (sensu Fun molecular function unknown cytoplasm* | YLR055C	7	8	1.08607	0.70279	0.68222	0.7664	0.23681	0.5033	0.19771	0.257755	0.520775	0.747805	0.48305	0.587045	0.103505	0.099205	0.133305	0.025515	-0.08459	0.23952
YBR262C	7 - YBR262C ˜ AIM5 biological process unknown molecular function unknown mitochondrion | Protein of unknown function; the authentic, non-tagged protein is detected in purified mitochondria in high-throughput studies; null mutant displays elevated frequency of mitochondrial genome lossYBR263W	7	8	0.58932	0.60628	0.73264	0.84194	0.60805	0.50724	0.16074	0.033845	0.595155	-0.115805	0.62101	-0.020805	0.333905	-0.007545	0.221885	0.066665	0.01944	-0.07615
YBL006C	7 - YBL006C ... LDB7 cell wall mannoprotein biosynt molecular function unknown cellular component unknown | YBL007C	7	8	0.86687	0.8165	0.84516	0.90909	0.80576	0.49836	0.36715	0.142755	0.350915	0.371815	0.66246	0.517925	0.111905	-0.217605	-0.138385	0.075005	-0.49293	0.0383
YOR298C-A	7 - YOR298C-A ... MBF1 positive regulation of transcr transcription coactivator activity nucleus* | YOR298W	7	8	0.77176	0.70618	1.12999	0.85904	0.76763	0.38749	0.30345	0.038285	0.385855	0.356115	0.35574	0.557455	-0.021725	0.066295	0.270175	0.313695	0.09176	0.39321
YOR013W	7 - YOR013W ˜ IRC11 | Dubious opening reading frame unlikely to encode a protein, based on available experimental and comparative sequence data; partially overlaps the uncharacterized gene YOR012C; null mutant displays increased levels of spontaneous Rad52 fociYOR014W	7	8	0.5073	0.58314	0.9957	0.62662	0.86692	0.84713	0.58684	0.271325	0.558075	0.325865	0.29107	0.253965	-0.004905	0.177875	0.069115	-0.238755	-0.17088	-0.04339
YJL100W	7 - YJL100W ... LSB6 actin filament organization* 1-phosphatidylinositol 4-kinase actcytoplasm* | YJL101C	7	8	0.47783	0.49452	0.63092	0.40351	0.86922	1.02592	0.33749	0.743995	0.476875	0.332245	0.31458	0.617045	0.011325	0.256225	0.294285	0.264265	0.02888	0.31937
YLL056C	7 - YLL056C ... YLL056C biological process unknown molecular function unknown cellular component unknown | YLL057C	7	8	0.51665	0.53095	0.52606	0.57206	0.86926	0.8366	0.12656	0.236085	0.140865	0.436925	0.20457	0.424995	-0.081775	0.237445	-0.159095	0.128815	0.07075	-0.02299
YER139C	7 - YER139C ˜ RTR1 biological process unknown molecular function unknown | Protein with a role in transcription; interacts with Rpo21p; has a cysteine-rich motif required for function and conserved in eukaryotes; shuttles between the nucleus and cytoplasm; RTR1 shows genetic interactions with RPB4, 5, 7, and 9YER140W	7	8	0.2453	0.64499	0.68641	0.75195	0.80484	0.92254	0.20137	0.770175	0.246585	0.337005	0.31637	0.360265	0.150575	0.517815	0.216125	0.408335	0.11631	-0.0596
YOR012W	7 - YOR012W ... YOR012W biological process unknown molecular function unknown cellular component unknown | YOR013W	7	8	0.26386	0.44959	0.6137	0.70185	0.66974	0.82561	0.35123	0.647365	0.254055	0.155715	0.29417	0.211825	0.106405	0.561935	0.062535	-0.013595	0.06255	-0.14005
YDR319C	7 - YDR319C ... YDR319C biological process unknown molecular function unknown cellular component unknown | YDR320C	7	8	0.681	0.73282	0.74458	0.92702	0.68143	0.68536	0.18603	0.531175	0.185285	0.325185	0.6976	0.311445	-0.383565	-0.224715	-0.030325	-0.404975	0.11234	-0.16023
YKL201C	7 - YKL201C ... MNN4 response to stress* molecular function unknown membrane | YKL202W	7	8	0.58023	0.80903	0.55818	1.03953	0.4451	1.43161	0.11582	0.218035	0.688055	0.288605	0.31354	0.366075	-0.054595	-0.212745	-0.023275	0.051735	-0.09618	0.02178
YNL107W	7 - YNL107W ... YAF9 chromatin remodeling* molecular function unknown cytoplasm* | YNL108C	7	8	0.76875	0.77065	0.9082	0.91973	0.27233	1.08861	0.01082	0.454955	0.587885	0.431205	0.43843	0.246285	-0.175315	-0.261315	-0.020415	0.092375	-0.21468	-0.03643
YLR306W	7 - YLR306W ... UBC12 protein monoubiquitination* ubiquitin conjugating enzyme activicellular component unknown | YLR307C-A	7	8	0.66749	0.54398	0.62271	0.33229	0.85201	0.59405	0.34772	0.840855	0.561575	0.459355	0.63954	0.630355	-0.348965	0.054995	-0.279165	-0.035245	0.15367	0.02059
YOL116W	7 - YOL116W ... MSN1 invasive growth (sensu Sacchar transcriptional activator activity nucleus | YOL117W	7	8	0.6911	0.56366	0.2373	0.53919	0.58595	0.88523	0.36959	0.667065	0.722835	0.549835	0.55091	0.703525	-0.284315	0.045775	0.188875	-0.047415	-0.02194	-0.0382
YIL139C	7 - YIL139C ... REV7 DNA repair* zeta DNA polymerase activity zeta DNA polymerase complex | YIL140W	7	8	0.60201	0.81951	0.46237	0.51525	0.1203	0.92331	0.25073	0.504275	0.323705	0.189175	0.46896	0.354735	0.088925	0.428125	0.071665	0.164935	0.10602	0.03293
YNR010W	7 - YNR010W ... CSE2 transcription from RNA polymer RNA polymerase II transcription medmediator complex | YNR011C	7	8	0.61171	0.56416	0.42866	0.37413	0.63242	0.66741	0.26745	0.002765	0.283965	0.216865	0.48518	0.509275	0.178015	0.105305	0.497655	0.065135	0.08934	-0.11394
YNR059W	7 - YNR059W ... MNT4 O-linked glycosylation "alpha-1,3-mannosyltransferase activ"cellular component unknown | YNR060W	7	8	0.29872	0.25661	0.55979	0.47171	0.75046	0.58874	0.40364	0.205595	-0.004565	0.469685	0.27502	0.313445	0.040155	0.201785	0.070845	-0.111775	-0.01103	0.2056
YLR081W	7 - YLR081W ... GAL2 galactose metabolism* glucose transporter activity* plasma membrane | YLR082C	7	8	0.52304	0.30387	0.3548	0.93095	0.15297	0.41832	0.42765	0.467585	0.593745	0.614365	0.17711	0.057085	-0.089635	-0.007705	-0.187695	0.204595	-0.05734	0.16592
YLR217W	7 - YLR217W ... | YLR218C	7	8	0.55797	0.66588	0.43126	1.082	0.55272	0.5558	0.64297	0.364035	0.631395	0.835015	0.21115	0.438195	0.215045	-0.027575	0.032095	0.305925	-0.18865	0.37412
YMR168C	7 - YMR168C ... CEP3 mitotic spindle checkpoint DNA bending activity* condensed nuclear chromosome kineto | YMR169C	7	8	0.58998	0.63704	0.94371	0.87502	0.67544	0.26372	0.43958	0.836345	0.106745	0.192325	0.34018	0.300915	-0.148125	0.506515	0.228205	-0.195235	0.17815	0.11494
YDR410C	7 - YDR410C ... STE14 peptide pheromone maturation protein-S-isoprenylcysteine O-methyendoplasmic reticulum membrane | YDR411C	7	8	0.44638	0.60522	0.64986	0.6383	0.55707	0.2161	0.14787	0.093265	0.298335	0.196005	0.27797	0.234135	-0.058525	-0.102045	-0.021585	0.444485	-0.28102	0.20318
YPL046C	7 - YPL046C ... ELC1 RNA elongation from RNA polyme transcriptional elongation regulatotranscription elongation factor com | YPL047W	7	8	0.39093	0.43229	0.39331	0.49596	0.86955	0.80466	0.54797	0.135175	0.198715	-0.184045	0.67449	0.282285	-0.093105	0.007695	-0.151255	-0.085315	-0.38515	-0.4197
YJL129C	7 - YJL129C ... TRK1 potassium ion homeostasis potassium ion transporter activity plasma membrane | YJL130C	7	8	0.37396	0.77813	0.36741	0.37153	0.18569	0.45167	0.06241	0.423475	0.645705	0.211015	0.16805	0.348485	-0.174635	-0.087765	-0.188435	-0.044915	-0.17672	-0.12964
YDR320C-A	7 - YDR320C-A ... DAD4 mitotic spindle organization a protein binding kinetochore* | YDR321W	7	8	0.49774	0.441	0.53357	0.28643	0.44457	0.30373	0.19219	-0.001455	0.575885	0.287335	0.34427	0.391485	-0.004295	-0.168165	0.029685	-0.215125	0.13534	-0.11433
YDR041W	7 - YDR041W ... RSM10 protein biosynthesis structural constituent of ribosome mitochondrial small ribosomal subun | YDR042C	7	8	0.62975	0.37641	0.59656	0.42198	0.3603	0.29999	0.46925	0.233455	0.314805	0.152685	0.54948	0.189045	0.108905	-0.176295	0.056615	-0.162595	-0.24499	-0.16969
YDR392W	7 - YDR392W ... SPT3 sporulation (sensu Fungi)* transcription cofactor activity SAGA complex* | YDR393W	7	8	0.37659	0.34593	0.54027	0.44915	0.20728	0.55788	-0.00615	0.141785	0.296475	0.216195	0.52113	0.249205	0.243355	0.019725	0.070985	-0.033285	0.04842	-0.07995
YNL225C	7 - YNL225C ... CNM67 microtubule nucleation* structural constituent of cytoskelespindle pole body* | YNL226W	7	8	0.53263	0.72142	0.52487	0.46102	0.06913	0.77315	0.02325	-0.012125	0.393125	0.393735	-0.0234	0.215695	0.274335	0.302345	0.229865	0.018455	-0.05666	-0.16303
YOR311C	7 - YOR311C ˜ DGK1 (HSD1) regulation of transcription molecular function unknown cytoplasm* | Diacylglycerol kinase, localized to the endoplasmic reticulum (ER); overproduction induces enlargement of ER-like membrane structures and suppresses a temperature-sensitive sly1 mutation; contains a CTP transferase domainYOR312C	7	8	0.48108	0.54643	0.60736	0.73971	0.55391	0.19881	0.41048	0.187695	0.415705	0.054645	0.35679	0.191355	-0.343075	-0.188575	0.002785	-0.008355	-0.05751	-0.0814
YOR060C	16 - YOR060C ... YOR060C biological process unknown molecular function unknown cytoplasm* | YOR061W	16	10	0.22287	0.39465	0.31407	0.41044	0.54136	0.47692	-0.09224	-0.035175	-0.120075	-0.321395	-0.21959	-0.159385	0.296115	0.443495	0.283755	0.413345	0.25709	0.19859
YNL184C	16 - YNL184C ... | YNL185C	16	10	0.35458	0.22851	0.40886	0.26409	0.41566	0.06919	0.09164	-0.049295	0.106375	-0.130875	0.27305	-0.065915	0.469595	0.248575	0.348085	0.273275	0.26428	0.3267
YOL033W	16 - YOL033W ... MSE1 protein biosynthesis* glutamate-tRNA ligase activity mitochondrion | YOL034W	16	10	0.09329	0.17654	0.21578	0.26205	0.28376	0.4911	-0.16415	0.314655	-0.106815	0.088495	0.0066	-0.000395	0.307165	0.523335	0.173805	0.176205	0.35053	0.38989
YKL128C	16 - YKL128C ... PMU1 biological process unknown molecular function unknown cytoplasm* | YKL129C	16	10	0.58547	0.2374	0.45962	0.24858	0.58396	0.39913	0.10312	0.071715	-0.304895	-0.125755	-0.16046	-0.172805	0.193425	0.390905	0.411155	0.175515	0.52339	0.3647
YFL057C	16 - YFL057C ... AAD16 aldehyde metabolism aryl-alcohol dehydrogenase activitycellular component unknown | YFL058W	16	10	0.43789	0.32094	0.29982	0.39611	0.74099	0.37328	0.03944	0.129975	-0.085645	0.073365	0.04756	0.017985	0.452285	0.330925	0.461165	0.592305	0.59653	0.63246
YOR007C	16 - YOR007C ... SGT2 biological process unknown molecular function unknown cytoplasm | YOR008C	16	10	0.27749	0.31475	0.40478	0.23075	0.37424	0.15749	0.0359	-0.157345	-0.098275	-0.011725	-0.16048	-0.180555	0.493315	0.249205	0.535575	0.355165	0.45585	0.46739
YOL067C	16 - YOL067C ... RTG1 transcription initiation from transcription coactivator activity cytoplasm* | YOL068C	16	10	0.63987	0.31185	0.74737	0.17262	0.24923	0.58659	0.15653	0.053165	0.267975	-0.070935	0.03332	0.059565	0.826205	0.568785	0.602335	0.631295	0.30985	0.39491
YLR421C	16 - YLR421C ... RPN13 proteolysis and peptidolysis endopeptidase activity "proteasome regulatory particle, lid" | YLR422W	16	10	0.64226	0.30852	0.40384	0.40622	0.56219	0.35172	0.14123	-0.147265	0.175675	0.107425	0.33472	0.219605	0.622635	0.458125	0.571495	0.486275	0.69704	0.5206
YOR090C	16 - YOR090C ... PTC5 biological process unknown protein phosphatase type 2C activitmitochondrion | YOR091W	16	10	0.45748	0.40268	0.59166	0.21963	0.171	0.36535	0.24598	0.153385	0.188185	0.333455	0.25174	0.259445	0.673245	0.502445	0.610265	0.292965	0.46299	0.68219
YDR134C	#N/A	16	10	0.20647	0.40781	0.30949	0.2437	0.32275	0.19184	0.16419	0.085565	0.006765	-0.020645	-0.03383	-0.070605	0.515005	0.592895	0.717645	0.717605	1.0335	0.47974
YLR376C	16 - YLR376C ... PSY3 error-free DNA repair molecular function unknown cytoplasm* | YLR377C	16	10	0.08197	0.38994	0.24621	0.37813	0.30444	0.39321	-0.00064	0.190495	0.193245	0.186005	-0.18347	-0.262985	0.732235	0.875295	0.451295	0.401735	0.61089	0.91483
YHR091C	16 - YHR091C ... MSR1 protein biosynthesis* arginine-tRNA ligase activity mitochondrion | YHR092C	16	10	0.3029	0.25171	0.30327	0.31894	0.22906	0.21152	0.12974	0.197045	-0.004795	0.116125	0.08494	0.189945	0.466455	0.367205	0.250025	0.172015	0.48074	0.41831
YOR033C	16 - YOR033C ... EXO1 mismatch repair 5'-flap endonuclease activity* nucleus | YOR034C	16	10	0.323	0.25906	0.11776	0.18577	0.0308	0.2288	-0.18146	0.000585	-0.087145	0.052255	-0.05124	0.047395	0.302565	0.549485	0.522775	0.246935	0.4217	0.46562
YPL115C	16 - YPL115C ... BEM3 establishment of cell polarity signal transducer activity* intracellular | YPL116W	16	10	0.28812	0.2371	0.30208	0.11098	0.27746	0.17969	0.18326	0.359175	0.123905	0.113375	0.10667	0.293445	0.526685	0.433355	0.391705	0.531685	0.45317	0.59596
YKL155C	16 - YKL155C ... RSM22 protein biosynthesis structural constituent of ribosome mitochondrial small ribosomal subun | YKL156W	16	10	0.21645	0.2435	0.2142	0.16067	0.28806	0.21949	0.18935	0.314215	0.331585	0.042555	0.43832	-0.023595	0.634895	0.570635	0.587105	0.459045	0.49088	0.4493
YNL327W	16 - YNL327W ... EGT2 cytokinesis cellulase activity cell wall (sensu Fungi) | YNL328C	16	10	0.21618	0.28382	0.05723	0.02183	-0.15629	0.17637	0.07739	0.333215	-0.014445	0.260885	0.17337	0.094795	0.315145	0.284975	0.368845	0.585805	0.54397	0.3972
YLR005W	16 - YLR005W ... SSL1 transcription initiation from general RNA polymerase II transcriptranscription factor TFIIH complex* | YLR006C	16	10	0.24508	0.17097	0.36681	-0.07624	0.40009	0.00973	0.35581	0.381585	0.197255	-0.009625	0.23646	0.308535	0.501705	0.589005	0.574365	0.446985	0.69837	0.38324
YGL095C	16 - YGL095C ... VPS45 protein complex assembly* unfolded protein binding cytosol* | YGL096W	16	10	0.37466	0.19718	0.33874	0.34098	0.06761	0.10999	0.1664	0.324215	0.212315	0.273995	0.36448	0.089245	0.472565	0.658555	0.491085	0.419675	0.51968	0.29686
YBL051C	16 - YBL051C ... PIN4 G2/M transition of mitotic cel molecular function unknown cytoplasm | YBL052C	16	10	0.19337	0.11636	0.01917	-0.01799	-0.08197	0.13663	0.20839	0.060165	0.032305	0.210295	-0.07675	0.186215	0.685635	0.358445	0.471905	0.236765	0.47378	0.55833
YDR238C	16 - YDR238C ... SEC26 ER to Golgi transport molecular function unknown COPI vesicle coat* | YDR239C	16	10	0.16997	-0.03555	0.07046	0.11194	-0.00206	0.09695	0.11147	0.156615	-0.133975	0.063135	-0.24601	0.216545	0.478875	0.799355	0.670235	0.547605	0.67205	0.55918
YNR031C	16 - YNR031C ... SSK2 protein amino acid phosphoryla MAP kinase kinase kinase activity cytosol* | YNR032C-A	16	10	0.14494	0.12924	0.33039	0.05812	0.21655	0.31035	0.03317	0.519175	0.181615	0.093645	-0.02969	0.222625	0.328445	0.537355	0.453995	0.485415	0.65987	0.68594
YHL023C	16 - YHL023C ... RMD11 biological process unknown molecular function unknown cellular component unknown | YHL024W	16	10	0.19812	0.22667	0.16685	-0.1106	0.09838	0.42793	0.04169	0.175675	0.148775	0.178135	0.04298	0.058665	0.533505	0.499785	0.403275	0.424635	0.22501	0.46439
YMR089C	16 - YMR089C ... YTA12 protein complex assembly* ATPase activity* cytoplasm* | YMR090W	16	10	0.12401	0.1905	0.09067	-0.00264	-0.00759	0.26058	0.07192	0.028515	0.325555	0.158815	0.26605	0.110635	0.740535	0.511265	0.669555	0.382245	0.54093	0.55538
YPL010W	16 - YPL010W ... RET3 retrograde transport, Golgi to protein binding COPI vesicle coat | YPL011C	16	10	0.17263	0.26183	-0.00388	0.44482	0.23248	0.31877	0.20095	0.355735	0.212835	-0.048275	0.31286	0.340965	0.592135	0.567115	0.581655	0.451885	0.62806	0.35363
YKL104C	16 - YKL104C ... GFA1 cell wall chitin biosynthesis glutamine-fructose-6-phosphate trancellular component unknown | YKL105C	16	10	0.09273	0.0462	-0.11689	0.12302	0.51308	0.1716	-0.13676	0.088765	-0.119085	-0.045185	-0.22222	0.021595	0.250195	0.351245	0.552075	0.476515	0.79393	0.61305
YBR231C	16 - YBR231C ... SWC5 chromatin remodeling molecular function unknown nucleus* | YBR232C	16	10	0.1173	0.24482	0.15487	0.01376	0.26138	0.35528	-0.24448	0.070545	0.318955	0.252335	0.177	0.156755	0.567325	0.262495	0.520575	0.561795	0.28163	0.60337
YDR309C	16 - YDR309C ... GIC2 establishment of cell polarity small GTPase regulator activity bud tip* | YDR310C	16	10	0.19525	-0.01293	0.19577	0.00349	0.34411	0.07282	0.06828	-0.053585	-0.131435	-0.058625	0.0734	0.158945	0.721835	0.552485	0.782485	0.451405	0.66006	0.9427
YML121W	16 - YML121W ... GTR1 phosphate transport GTPase activity cytoplasm* | YML122C	16	10	0.23233	0.13117	0.18036	0.11736	0.21776	0.40817	0.09521	0.043145	0.052775	-0.336575	0.21314	0.085175	0.443535	0.385495	0.461375	0.204615	0.74623	0.18053
YNL142W	16 - YNL142W ... MEP2 pseudohyphal growth* ammonium transporter activity plasma membrane | YNL143C	16	10	0.06764	0.47831	0.20215	0.42053	0.05321	0.24809	-0.23551	0.302435	0.096995	0.097395	-0.23839	0.047125	0.327245	0.588905	0.170835	0.605975	0.65585	0.80839
YFL029C	16 - YFL029C ... CAK1 protein amino acid phosphoryla protein kinase activity cytoplasm | YFL030W	16	10	0.15288	0.30891	0.10574	0.02325	0.21449	0.11696	0.37758	-0.046375	-0.121385	0.488595	0.37001	0.232955	0.432215	0.727145	0.515885	0.406675	0.23591	0.67713
YJL217W	16 - YJL217W ˜ REE1 biological process unknown molecular function unknown | Cytoplasmic protein involved in the regulation of enolase (ENO1); mRNA expression is induced by calcium shortage, copper deficiency (via Mac1p) and the presence of galactose (via Gal4p); mRNA expression is also regulated by the cell cycleYJL218W	16	10	-0.04046	-0.19824	0.15265	0.12743	0.44451	0.01613	-0.25356	0.419515	0.152735	-0.252045	-0.26323	0.140545	0.164185	0.277025	0.552755	0.498735	0.49034	0.44686
YHR155W	16 - YHR155W ... YSP1 biological process unknown molecular function unknown mitochondrion | YHR156C	16	10	-0.03663	0.00436	-0.00905	-0.0483	0.02261	0.25772	0.2249	0.381545	-0.035635	0.023085	0.01826	0.191985	0.314155	0.524035	0.453545	0.540835	0.31083	0.55391
YAL043C	16 - YAL043C ... PTA1 mRNA polyadenylylation* RNA binding mRNA cleavage and polyadenylation s | YAL044C	16	10	0.18571	-0.01378	0.10114	-0.026	0.26596	0.10418	0.1633	0.299125	-0.241205	-0.147975	-0.02052	0.174205	0.153625	0.294845	0.402345	0.286455	0.5705	0.49119
YHL009C	16 - YHL009C ... YAP3 regulation of transcription fr transcription factor activity nucleus | YHL010C	16	10	0.01236	0.06201	0.06719	-0.2259	0.17296	0.27096	-0.11577	0.112245	-0.182845	0.053805	-0.09654	-0.132305	0.408005	0.546945	0.405275	0.277855	0.175	0.37759
YML025C	16 - YML025C ... YML6 protein biosynthesis* structural constituent of ribosome mitochondrial large ribosomal subun | YML026C	16	10	0.12272	-0.02874	0.31696	-0.09211	0.42073	0.07215	0.04398	-0.049545	-0.231595	-0.021345	0.10612	0.081425	0.589155	0.176855	0.273595	0.235015	0.41269	0.26173
YIR009W	16 - YIR009W ... MSL1 nuclear mRNA splicing, via spl RNA binding snRNP U2 | YIR010W	16	10	-0.20925	0.14799	-0.04566	0.01101	0.19398	0.27215	-0.15214	-0.241905	-0.066715	-0.089705	0.20817	-0.106645	0.447165	0.399025	0.155805	0.361405	0.33004	0.69204
YCL026C-B	17 - YCL026C-B ... HBN1 biological process unknown molecular function unknown cytoplasm* | Putative protein of unknown function; similar to bacterial nitroreductases; green fluorescent protein (GFP)-fusion protein localizes to the cytoplasm and nucleus; protein becomes insoluble upon intracellular iron depletionYCL027W	17	11	1.70764	1.26927	1.34764	1.36405	2.01853	1.83023	0.55256	0.576895	0.328985	0.475685	0.79013	0.582905	1.37203	1.1118	1.49491	1.5958	1.74908	1.40713
YGL117W	17 - YGL117W ... YGL117W biological process unknown molecular function unknown cellular component unknown | YGL118C	17	11	2.04088	1.89702	2.06545	2.12699	1.63746	1.93247	0.68568	0.620785	0.291475	0.715505	0.398	0.794755	1.38792	2.0133	1.58137	1.52236	1.22239	1.61288
YHL035C	17 - YHL035C ... VMR1 transport "ATPase activity, coupled to transme"mitochondrion* | YHL036W	17	11	1.87322	1.34142	1.65888	1.78756	1.8703	2.31912	0.55299	0.279725	-0.238215	0.399315	0.87395	0.176435	1.34562	1.53486	1.63312	-0.611245	1.71122	1.37038
YEL059C-A	17 - YEL059C-A ... SOM1 proteolysis and peptidolysis molecular function unknown mitochondrial inner membrane* | YEL059W	17	11	1.86422	1.34715	1.4341	0.6715	1.79906	1.51138	0.77163	0.551235	0.976765	0.722695	0.72305	0.461615	1.42955	1.55784	1.3585	0.857335	1.66826	1.23757
YJR155W	17 - YJR155W ... AAD10 aldehyde metabolism aryl-alcohol dehydrogenase activitycellular component unknown | YJR156C	17	11	0.9297	0.92358	0.91333	0.73563	0.91483	1.10201	0.38054	0.462345	-0.075525	0.275865	0.16226	0.199535	1.24507	1.49957	1.14352	1.61329	1.15343	1.43985
YHR018C	17 - YHR018C ... ARG4 arginine biosynthesis argininosuccinate lyase activity cytosol | YHR019C	17	11	1.27533	1.23478	1.33222	1.14191	1.50662	1.3158	0.98735	0.661775	0.264835	0.811685	0.94733	1.0287	2.37214	2.52007	2.44773	1.75381	2.12602	2.27542
YBR068C	17 - YBR068C ... BAP2 amino acid transport amino acid transporter activity plasma membrane | YBR069C	17	11	0.50191	0.76796	0.64796	0.62641	1.00326	0.81934	0.52459	0.598475	0.459065	0.106665	0.67001	0.127085	1.74547	1.68155	1.68898	1.42427	2.19893	1.67608
YOR226C	17 - YOR226C ... ISU2 iron ion homeostasis* molecular function unknown mitochondrial matrix | YOR227W	17	11	1.21032	1.09395	1.3716	0.93211	1.34571	1.13848	0.42709	0.318495	0.711415	0.267735	0.7555	0.355385	2.36715	2.04923	2.26099	1.10387	2.10247	1.98883
YOR032C	17 - YOR032C ... HMS1 pseudohyphal growth transcription factor activity cellular component unknown | YOR032W-A	17	11	0.42518	1.48839	0.72067	0.71545	0.16354	0.93103	0.0914	0.541445	0.153365	0.540625	-0.24893	0.331835	1.62319	1.87989	1.64179	1.52534	1.29922	1.80176
YPL250C	17 - YPL250C ... ICY2 biological process unknown molecular function unknown cellular component unknown | YPL251W	17	11	1.33324	0.46175	1.55169	1.56205	1.96238	1.67936	0.79892	0.201675	0.796865	0.355335	0.69751	0.731195	1.33207	1.18565	2.23992	2.3396	1.7414	2.32732
YIL014C-A	17 - YIL014C-A ... YIL014C-A biological process unknown molecular function unknown cellular component unknown | YIL014W	17	11	1.40575	0.70281	1.0409	1.05505	1.29673	0.41273	0.78613	-0.623625	-0.265335	-0.033195	0.31273	-0.703145	1.38257	1.51978	1.30228	1.59522	1.60373	0.99132
YPL092W	17 - YPL092W ... SSU1 sulfite transport sulfite transporter activity plasma membrane | YPL093W	17	11	0.72305	1.02444	0.97814	0.88829	1.07092	0.9766	-0.39346	0.114505	-0.141645	-0.434545	-0.33361	-0.038095	1.53093	1.60715	1.81231	2.33187	1.89908	2.12958
YBR045C	17 - YBR045C ... GIP1 spore wall assembly (sensu Fun protein phosphatase 1 binding prospore membrane* | YBR046C	17	11	0.58607	0.8499	0.67315	0.81681	0.39878	1.0185	-0.02276	0.509385	0.512965	0.770455	0.3364	0.693125	2.60691	2.31778	2.36484	2.4995	2.4641	2.08113
YOR383C	17 - YOR383C ... FIT3 siderophore transport molecular function unknown cell wall (sensu Fungi) | YOR384W	17	11	0.28699	0.38726	0.26956	0.32474	0.5806	0.11273	0.00779	-0.608495	0.121555	0.146335	0.76775	-0.158815	2.46923	1.68155	2.25671	-0.400865	2.64136	2.80939
YCR100C	17 - YCR100C ... YCR100C biological process unknown molecular function unknown cellular component unknown | YCR101C	17	11	0.57724	1.16222	0.44132	1.0595	0.54082	1.21587	0.35946	0.605875	0.065175	0.693905	0.20132	0.090355	0.762635	1.41901	0.696835	0.937085	0.84159	1.5717
YOL064C	17 - YOL064C ... MET22 sulfate assimilation* "3'(2'),5'-bisphosphate nucleotidase"cytoplasm | YOL065C	17	11	1.31172	0.82878	1.08924	1.16298	1.24436	0.97435	0.6768	0.845755	0.697725	0.340215	0.69108	0.601935	1.41037	1.4126	1.38187	0.952705	1.47857	1.15572
YCL041C	17 - YCL041C ... | YCL042W	17	11	0.79576	0.98461	0.83676	0.7384	1.52984	1.13453	0.34906	0.275955	0.668295	0.601215	0.48125	0.763185	0.552285	1.35556	0.790665	1.12268	1.41246	1.2503
YDR214W	17 - YDR214W ... AHA1 response to stress* chaperone activator activity cytoplasm | YDR215C	17	11	1.48524	1.1641	1.35581	1.26209	1.46023	1.30001	0.57252	0.830345	0.455155	0.870915	0.4787	0.711495	1.51618	1.3904	1.38671	1.16439	1.33696	1.78034
YIR017C	17 - YIR017C ... MET28 regulation of transcription fr DNA binding* nucleus | YIR017W-A	17	11	1.4725	1.48823	0.9358	1.47773	1.1858	1.41224	0.60395	0.619495	0.386555	1.4682	0.94157	1.04604	1.04028	1.64945	1.1214	1.75371	1.36173	1.85979
YDR077W	24 - YDR077W ... SED1 cell wall organization and bio structural constituent of cell wallmitochondrion* | YDR078C	24	12	-0.01766	-0.61068	0.08508	-1.15658	0.60219	-1.30263	2.04164	0.862145	1.64892	1.568	2.06709	1.24267	1.42372	0.904815	1.4267	0.875925	0.98463	0.78354
YJL157C	24 - YJL157C ... FAR1 signal transduction during con cyclin-dependent protein kinase inhcytoplasm* | YJL158C	24	12	0.0656	0.1957	0.04835	0.3931	-0.12865	0.30558	0.14166	0.716165	0.229065	0.360205	0.02867	0.351525	0.301575	0.968125	0.550005	1.53245	0.52116	0.74023
YDR106W	24 - YDR106W ... ARP10 biological process unknown molecular function unknown cytoplasm | YDR107C	24	12	0.03073	0.47482	-0.05025	0.08661	-0.33657	0.59661	-0.03507	0.498285	0.081425	0.693665	0.05563	0.649895	0.627565	0.709365	0.808865	1.559	0.70027	0.69609
YJL216C	24 - YJL216C ... YJL216C biological process unknown "hydrolase activity, hydrolyzing O-g"cellular component unknown | YJL217W	24	12	-0.28372	0.56032	-0.16475	0.12891	0.00144	0.54509	0.35782	0.782765	0.269785	0.777255	0.21504	0.591685	0.617495	0.867525	0.629005	1.37857	0.58155	0.96815
YDR170W-A	24 - YDR170W-A YDR170W-A ò TRANSPOSABLE TY ELEMENTYDR183C-A	24	12	0.44343	0.45948	0.44443	0.30309	0.28753	0.18825	0.73756	0.776385	0.647175	0.564705	0.26625	0.591895	2.05323	1.74299	1.57746	1.72262	1.09975	1.79302
YGL125W	24 - YGL125W ... MET13 methionine metabolism* structural constituent of ribosome*cytoplasm* | YGL126W	24	12	-0.05294	0.2035	0.07279	0.08987	0.29516	0.13662	0.74818	1.13024	0.684695	0.964235	0.79765	0.660985	1.5716	1.61567	1.40796	1.83865	2.21893	1.78202
YFL021W	24 - YFL021W ... GAT1 transcription initiation from specific RNA polymerase II transcrinucleus | YFL022C	24	12	-0.16065	-0.27481	-0.11423	-0.28065	-0.24865	-0.18036	0.51774	0.306295	0.271455	0.538785	0.53006	0.287345	1.70399	1.47904	1.79591	1.53158	1.89197	1.86172
YDR275W	24 - YDR275W ... BSC2 biological process unknown molecular function unknown lipid particle | YDR276C	24	12	-0.53635	0.1195	-0.25069	0.13549	-0.54446	-0.01864	1.17971	1.33241	1.32774	1.17583	1.36258	1.11925	0.942845	1.3131	1.20524	1.65643	1.48901	1.59756
YNL028W	24 - YNL028W ... | YNL029C	24	12	0.39948	-0.03759	0.35048	0.04745	0.37582	-0.21143	1.14163	0.171215	1.12194	0.996235	0.85191	1.25866	1.06716	0.923205	2.49483	3.75032	1.06181	1.42191
YBL043W	24 - YBL043W ... ECM13 cell wall organization and bio molecular function unknown cellular component unknown | YBL044W	24	12	-0.2967	-0.53467	-0.48376	-0.23133	-0.42322	0.01877	0.66716	0.348345	-0.231495	0.751145	0.97146	0.064085	1.26462	1.61905	1.11532	2.16805	1.02339	1.58842
YOR381W-A	24 - YOR381W-A ... YOR381W-A biological process unknown molecular function unknown cellular component unknown | YOR382W	24	12	0.20019	1.13934	0.43141	0.66538	-0.01702	0.40563	0.59963	0.628415	0.122165	0.972265	0.54762	0.370655	1.63143	1.94321	1.89928	0.763455	0.94896	1.8709
YDR182W-A	24 - YDR182W-A ... YDR182W-A biological process unknown molecular function unknown cellular component unknown | YDR183W	24	12	-0.5543	0.32937	-0.38896	-0.19388	-0.79238	0.3429	0.7685	0.898355	0.370755	1.6314	0.7519	0.625945	0.990375	1.27245	1.19175	1.65934	0.82901	0.02851
YNL145W	24 - YNL145W ... MFA2 signal transduction during con mating pheromone activity extracellular region | YNL146C-A	24	12	0.02517	-0.04455	-0.13534	0.04485	-0.18186	0.05688	0.62888	0.944685	0.518205	1.7627	1.1308	1.25802	1.14319	-0.315435	1.05197	1.78016	0.52542	0.91299
YPL136W	24 - YPL136W ... | YPL137C	24	12	-0.1418	0.32579	0.30726	0.23714	0.51962	-0.23513	0.17175	-0.100205	0.465305	-0.299535	0.9241	-0.197615	1.36492	1.25825	1.1382	2.01187	1.00605	1.31325
YDL126C	24 - YDL126C ... CDC48 ubiquitin-dependent protein ca ATPase activity nucleus* | YDL127W	24	12	0.37504	0.12047	0.22523	0.23582	0.44339	0.27445	0.85451	1.29914	0.526725	0.671215	0.69235	0.833495	1.19256	1.5653	1.42715	1.25663	2.01719	1.58839
YCL027W	24 - YCL027W ... FUS1 conjugation with cellular fusi molecular function unknown plasma membrane* | YCL028W	24	12	0.2236	0.72555	0.33544	0.48921	0.40434	0.28582	0.63053	0.901095	0.860865	1.06542	0.7439	1.40244	1.41912	1.64465	1.49341	2.10901	1.27867	1.41012
YIL160C	24 - YIL160C ... POT1 fatty acid beta-oxidation acetyl-CoA C-acyltransferase activiperoxisomal matrix | YIL161W	24	12	0.15351	0.23434	0.27682	0.27297	0.28781	0.08295	0.93422	1.61044	0.663425	1.41197	0.76961	1.43799	0.464235	0.883045	0.799285	1.63173	0.92366	1.25457
YER097W	24 - YER097W ... | YER098W	24	12	0.03147	0.58114	0.63167	0.52899	0.48476	0.24161	0.76666	0.476845	0.878725	1.15579	0.7305	1.15036	0.369895	0.953695	1.48158	1.7329	0.71536	1.61724
YHR069C-A	24 - YHR069C-A | YHR070C-A	24	12	0.08092	0.7772	0.26491	0.64956	-0.14641	0.74034	0.92311	1.00743	1.13265	1.66256	1.29796	1.38695	1.22399	1.83563	0.872165	2.17489	0.8106	1.36121
YIL071W-A	24 - YIL071W-A | YIL072W	24	12	0.10785	0.8615	0.29472	0.52463	0.3898	0.57888	0.7691	1.3997	0.571595	1.5539	0.64292	0.975845	1.67457	1.82784	1.05462	2.27183	0.98971	1.35977
YOL024W	24 - YOL024W ... YOL024W biological process unknown molecular function unknown cellular component unknown | YOL025W	24	12	0.08157	1.15257	0.12185	0.28846	0.28514	0.45527	0.99098	1.13701	0.907555	1.75806	0.64949	1.52265	1.16393	1.49247	1.53965	1.92745	1.60653	1.72638
YIL050W	24 - YIL050W ... PCL7 regulation of glycogen biosynt cyclin-dependent protein kinase regcyclin-dependent protein kinase hol | YIL051C	24	12	-0.33591	-0.41041	-0.19786	-0.29704	-0.23694	-0.28086	0.87553	0.760125	0.479555	0.925715	0.68249	0.765635	0.902855	0.727545	0.876445	0.988895	0.80922	1.30909
YNL104C	24 - YNL104C ... LEU4 leucine biosynthesis 2-isopropylmalate synthase activitycytoplasm* | YNL105W	24	12	0.12025	0.34883	0.19056	0.3811	0.36606	0.03537	0.29546	0.368255	0.348135	0.016195	0.36867	0.294355	1.21087	1.25802	0.974135	1.12142	1.48057	1.20483
YDR481C	24 - YDR481C ... PHO8 protein amino acid dephosphory alkaline phosphatase activity vacuolar membrane (sensu Fungi) | YDR482C	24	12	-0.1143	-0.23701	-0.15759	-0.31156	-0.20668	-0.33772	1.0475	1.13224	0.902705	0.811315	1.09652	1.06099	1.13275	1.37847	1.23432	1.20088	1.20455	1.47223
YKL169C	24 - YKL169C ... | YKL170W	24	12	-0.60242	-0.41191	-0.47656	-0.11533	-0.24245	0.24447	0.85768	1.12109	0.719425	0.745725	0.15431	0.991245	0.518615	1.08468	0.998945	1.04153	1.12952	0.95953
YLR438W	24 - YLR438W ... CAR2 arginine catabolism ornithine-oxo-acid transaminase actcytoplasm* | YLR439W	24	12	-0.05855	0.12882	-0.35743	0.07446	0.55487	-0.10359	0.64543	0.409685	0.676645	0.656245	1.12507	0.375085	1.09388	0.859755	0.807375	1.29405	1.03153	1.05777
YPL111W	24 - YPL111W ... CAR1 arginine catabolism to ornithi arginase activity cytosol | YPL112C	24	12	-0.07615	-0.59162	-0.36377	-0.16421	0.32605	-0.21031	1.32954	0.597505	0.231425	0.874435	1.35746	0.847345	0.891525	0.902555	1.25934	1.1421	1.40881	1.33315
YNL277W-A	24 - YNL277W-A ... YNL277W-A biological process unknown molecular function unknown cellular component unknown | YNL278W	24	12	-0.04445	-0.35008	-0.39325	-0.08077	0.66531	0.10808	0.23826	0.253605	0.547985	0.635005	0.25775	0.315015	1.17413	1.64664	0.722615	1.30452	1.21693	0.78703
YER104W	24 - YER104W ... RTT105 negative regulation of DNA tra molecular function unknown cytoplasm* | YER105C	24	12	-0.04722	-0.07178	0.46611	0.44605	0.31245	0.23934	0.88896	0.670645	0.768095	0.779195	0.59585	0.767825	0.393855	0.738965	1.3698	1.71592	0.74518	1.78772
YNL109W	24 - YNL109W ... | YNL110C	24	12	0.3896	0.16038	-0.08266	0.02242	0.30293	-0.16738	0.96329	0.886595	0.459495	0.922685	0.85399	0.493835	0.638285	1.51432	0.803715	2.00543	1.12232	1.08026
YNL171C	24 - YNL171C ... | YNL172W	24	12	-0.29748	-0.48516	0.16976	0.19754	-0.07206	0.13826	-0.01033	0.665625	0.248395	1.08055	0.73216	0.000805	1.18397	0.601235	0.827205	0.861995	0.58673	1.19248
YDR451C	24 - YDR451C ... YHP1 negative regulation of transcr DNA binding* nuclear chromosome | YDR452W	24	12	-0.21179	-0.51883	-0.40997	-0.46468	0.37062	-0.29343	0.10181	-0.195175	-0.335255	0.070805	0.37413	-0.121465	1.3794	1.16744	1.57644	1.1642	1.29773	1.57067
YJL135W	24 - YJL135W ... | YJL136C	24	12	-0.70352	0.26594	-0.61754	-0.6153	-0.40194	0.33605	0.30717	0.583475	-0.195005	0.392375	0.18109	0.762995	0.789025	1.47616	0.181195	1.06859	1.13744	1.04441
YDR273W	24 - YDR273W ... DON1 meiosis* molecular function unknown spindle* | YDR274C	24	12	0.01576	0.46488	0.0624	0.16525	0.00596	0.8523	0.805	0.978935	0.989925	1.56058	1.00715	1.03007	1.25449	1.26679	0.928565	1.10024	0.86582	0.68851
YBR016W	24 - YBR016W ... YBR016W response to dessication molecular function unknown plasma membrane | YBR017C	24	12	0.64124	0.25644	0.39375	0.26737	-0.02612	0.19386	1.04982	0.445705	0.475405	1.0814	0.65432	0.904855	1.07032	0.904825	1.19423	0.366015	1.02226	1.16183
YDL076C	24 - YDL076C ... RXT3 chromatin silencing histone deacetylase activity nucleus | YDL077C	24	12	0.2055	0.21839	-0.06203	0.28237	0.11593	0.37128	0.74012	0.993815	0.570565	1.05753	0.5212	0.786975	1.20039	0.912875	1.54683	1.30363	1.31687	1.35346
YMR122W-A	24 - YMR122W-A ... YMR122W-A biological process unknown molecular function unknown cytoplasm* | YMR123W	24	12	-0.15621	-0.18867	0.11392	0.08269	0.59338	-0.08237	1.20348	1.01564	0.795245	1.04051	1.53793	1.00906	0.810945	0.918765	0.952525	0.836445	1.13147	1.06383
YLR142W	25 - YLR142W iESR cluster PUT1 glutamate biosynthesis* proline dehydrogenase activity mitochondrion | YLR143W	25	13	0.26947	0.47795	0.20224	0.21634	0.17204	0.9005	2.44589	2.04975	1.97378	2.74096	2.17609	2.0976	0.613145	1.45493	1.40552	1.57388	1.49101	1.55642
YCL064C	25 - YCL064C ... CHA1 threonine catabolism* L-serine ammonia-lyase activity* mitochondrion* | YCL065W	25	13	0.08156	-0.09386	-0.09598	0.00404	-0.02998	0.20573	2.09602	2.20614	1.48246	2.039	1.84926	2.14445	1.55333	1.7794	1.91585	1.84546	2.26199	1.84096
YJR061W	25 - YJR061W ... YJR061W biological process unknown molecular function unknown cellular component unknown | YJR062C	25	13	-0.43673	0.17325	-0.37934	-0.29737	-0.29488	0.41745	1.70815	1.83902	1.6356	1.94949	1.47636	1.69541	1.69439	2.11506	1.74619	2.23522	1.91424	2.18858
YPL113C	25 - YPL113C ... YPL113C metabolism oxidoreductase activity cellular component unknown | YPL114W	25	13	0.87418	0.83867	0.98311	1.06805	1.18041	1.60764	1.16472	1.03077	0.418795	1.44741	0.86161	1.42524	1.81117	2.17358	1.79127	2.14018	1.80684	2.21073
YDR022C	25 - YDR022C ... CIS1 regulation of cyclin dependent molecular function unknown cytoplasm | YDR023W	25	13	0.88041	1.0183	0.50454	1.28609	1.00548	1.69899	1.16881	1.09852	1.26734	0.836935	1.40559	1.31496	1.56503	1.88975	1.64689	2.46358	1.73527	2.41091
YGL179C	25 - YGL179C ... TOS3 glucose metabolism protein kinase activity cytoplasm* | YGL180W	25	13	1.31028	1.33981	1.42233	1.56307	1.15007	1.00156	1.19677	1.16925	0.983245	1.56401	0.90066	1.34803	1.87356	2.13611	2.10267	2.16212	1.99393	2.39338
YDR277C	25 - YDR277C ... MTH1 signal transduction* molecular function unknown cellular component unknown | YDR278C	25	13	1.08952	1.2878	0.95761	0.64009	1.21275	1.47959	1.46878	1.80418	1.30404	1.45213	1.43536	1.47965	2.16228	2.146	2.70809	2.02848	2.43595	2.60849
YDR216W	25 - YDR216W ... ADR1 transcription* transcription factor activity nucleus | YDR217C	25	13	1.01215	1.34585	1.13087	1.43921	0.88579	1.07167	2.03905	2.24803	1.55628	2.06954	1.56627	2.04592	1.96599	2.4784	2.52068	2.45411	2.42789	2.93647
YHL030W	25 - YHL030W ... ECM29 protein catabolism protein binding cytoplasm* | YHL030W-A	25	13	0.9887	1.25176	1.14616	1.29423	1.22157	1.40274	1.80729	2.19507	1.71901	1.81488	1.91505	2.00638	2.24212	2.67753	2.38652	2.05973	2.72445	2.67049
YLR299W	25 - YLR299W iESR cluster ECM38 glutathione catabolism protein-glutamine gamma-glutamyltraintracellular | YLR300W	25	13	0.83341	1.01244	1.00881	1.10603	1.18152	1.20954	1.97929	1.71652	1.4994	1.6623	1.84703	1.86088	1.99822	2.47288	2.16052	1.58184	2.25482	2.54903
YDR461C-A	25 - YDR461C-A YDR461C-A YGL194C-A	25	13	0.81281	0.94184	0.74777	0.73777	0.54965	0.85707	1.72306	1.6036	1.8784	1.97559	1.67617	1.77631	2.00585	2.28367	1.92694	1.13871	1.62175	2.25539
YJR156C	25 - YJR156C ... THI11 thiamin biosynthesis protein binding cellular component unknown | YJR157W	25	13	0.3911	0.95371	0.67719	0.85798	0.75533	1.11878	2.30572	2.25237	2.07856	1.86986	1.88284	2.07343	1.73737	2.02258	2.03906	2.17596	1.70856	2.57195
YPR002W	25 - YPR002W ... PDH1 propionate metabolism molecular function unknown cytoplasm* | YPR003C	25	13	0.27282	0.14452	0.10794	0.13118	0.59015	0.70278	2.17768	2.19286	1.35183	2.17458	2.27863	1.86711	1.89284	1.97074	1.97866	2.13156	1.96038	1.79941
YCL042W	25 - YCL042W iESR cluster YCL042W biological process unknown molecular function unknown cytoplasm | YCL043C	25	13	1.49692	0.25107	1.40891	0.50335	0.47799	1.31322	2.04349	1.22135	1.26336	2.29604	1.84344	1.2506	1.67999	1.94215	2.99369	1.36877	2.54205	1.9473
YBR047W	25 - YBR047W ... FMP23 biological process unknown molecular function unknown mitochondrion | YBR048W	25	13	1.16309	1.58915	0.99684	1.21933	1.56254	1.93172	1.57574	0.745465	0.980355	1.44508	1.9025	1.4644	2.47981	2.27886	1.874	1.89838	1.69184	2.59557
YHR044C	25 - YHR044C ... DOG1 glucose metabolism 2-deoxyglucose-6-phosphatase activicellular component unknown | YHR045W	25	13	1.50442	1.24432	1.80257	0.96002	1.69296	1.65643	2.24494	1.87525	1.95182	1.4911	1.33702	1.19955	2.40772	2.50067	2.48367	1.97524	2.348	2.16902
YFL058W	25 - YFL058W ... THI5 thiamin biosynthesis molecular function unknown cellular component unknown | YFL059W	25	13	0.49684	0.57305	0.51352	0.57961	1.03846	1.14492	1.86493	1.92898	1.96432	2.18526	2.05312	2.38835	1.55534	1.95775	1.92491	2.53071	1.51225	2.47362
YNL332W	25 - YNL332W ... THI12 thiamin biosynthesis molecular function unknown cellular component unknown | YNL333W	25	13	0.85847	1.22652	0.7052	0.66634	0.99218	0.69591	2.46058	2.06596	1.73598	2.4861	2.0684	2.43106	1.66498	2.08604	2.01724	2.80963	1.94847	2.52545
YDL244W	25 - YDL244W ... THI13 thiamin biosynthesis molecular function unknown cellular component unknown | YDL245C	25	13	0.53888	0.98549	0.3312	0.79233	0.93454	1.00177	1.76879	1.9485	1.69324	2.10735	1.52158	2.45389	1.35651	1.95209	1.74141	2.79154	1.58439	1.46256
YHR037W	25 - YHR037W ... PUT2 glutamate biosynthesis* 1-pyrroline-5-carboxylate dehydrogemitochondrion | YHR038W	25	13	0.52255	0.25254	0.46698	0.37098	0.72298	0.44332	1.63115	1.5838	1.27492	1.41877	1.47744	1.55381	1.53378	1.74351	1.66322	1.60529	1.70365	1.79221
YCR098C	25 - YCR098C ... GIT1 glycerophosphodiester transpor glycerophosphodiester transporter aplasma membrane | YCR099C	25	13	0.99794	1.85714	1.09226	1.39494	1.19251	1.52807	1.34923	1.26045	1.13759	1.56658	0.96085	1.39643	2.09601	2.68505	2.24524	3.57381	2.72443	2.68134
YHR157W	25 - YHR157W ... REC104 meiotic recombination* molecular function unknown nucleus | YHR158C	25	13	0.0674	0.84372	0.43856	0.64319	-0.03344	0.78428	2.48206	1.98321	1.30665	2.79067	1.9448	3.13142	1.80341	2.36638	2.23742	3.36106	1.85977	2.83068
YOR285W	25 - YOR285W iESR cluster YOR285W biological process unknown molecular function unknown mitochondrion* | YOR286W	25	13	1.45886	1.28801	1.64871	1.37521	1.55576	1.49761	1.6213	1.32668	1.29947	2.0195	2.09075	1.57133	2.71292	2.77791	2.92943	2.53735	2.94264	3.02685
YDR287W	27 - YDR287W ˜ iESR cluster INM2 inositol phosphate dephosphory inositol-1(or 4)-monophosphata | Inositol monophosphatase, involved in biosynthesis of inositol; enzymatic activity requires magnesium ions and is inhibited by lithium and sodium ions; inm1 inm2 double mutant lacks inositol auxotrophyYDR288W	27	14	0.77609	0.3447	0.73506	0.39706	1.22413	0.50258	0.37793	0.302785	0.108115	0.360065	0.32727	0.403525	0.728505	1.21819	0.649145	0.401615	0.80986	0.95857
YPL168W	27 - YPL168W ... YPL168W biological process unknown molecular function unknown mitochondrion | YPL169C	27	14	0.58209	0.66747	0.29134	0.63377	0.33035	0.617	0.14271	-0.060305	0.224975	0.349315	0.35442	0.590745	0.794985	0.759385	0.787585	0.489365	0.6522	0.8306
YNR061C	27 - YNR061C ... YNR061C biological process unknown molecular function unknown vacuole (sensu Fungi) | YNR062C	27	14	0.2592	0.53723	0.75576	0.88387	0.39667	0.23182	0.13985	0.487555	0.528295	-0.019535	0.09452	0.293115	0.736535	0.534175	0.892475	0.920265	0.95215	1.10258
YMR180C	27 - YMR180C ... CTL1 RNA processing polynucleotide 5'-phosphatase activcytoplasm* | YMR181C	27	14	0.42933	0.28193	0.24986	0.33702	0.47286	0.36091	0.31355	0.494405	0.515575	0.512605	0.35498	0.330535	0.738895	0.765625	0.746325	0.796155	0.98067	0.90683
YDR260C	27 - YDR260C ... SWM1 spore wall assembly (sensu Fun molecular function unknown nucleus* | YDR261C	27	14	0.53377	0.14378	0.53955	0.12647	0.49354	0.59467	0.29902	0.542275	0.331575	0.034315	0.22461	0.256845	0.570365	0.797945	0.915495	0.641185	0.74731	0.83659
YLR028C	27 - YLR028C ... ADE16 aerobic respiration* IMP cyclohydrolase activity* cytosol | YLR029C	27	14	0.43981	0.17127	0.47677	0.29154	0.56111	0.2049	0.40453	0.425675	0.240015	0.153125	0.31185	0.483575	0.814285	0.809365	0.833365	0.469205	0.79748	0.97468
YDR174W	27 - YDR174W ... HMO1 plasmid maintenance single-stranded DNA binding* cytoplasm* | YDR175C	27	14	0.33248	0.25782	0.41582	0.19334	0.46303	0.56008	0.44223	-0.289755	0.315775	-0.061905	0.43467	0.425465	1.3035	0.951955	1.02736	0.846835	1.01687	0.89611
YPR103W	27 - YPR103W ... PRE2 ubiquitin-dependent protein ca endopeptidase activity "proteasome core complex, beta-subun" | YPR104C	27	14	0.68058	0.54483	0.63418	0.6004	0.6718	0.72641	0.81491	0.758135	0.477625	0.659675	0.75885	0.919585	1.18308	0.927575	1.08973	0.893375	1.15068	1.234
YMR214W	27 - YMR214W ... SCJ1 protein folding* chaperone binding endoplasmic reticulum lumen | YMR215W	27	14	0.6493	0.6492	0.86482	0.56047	0.8247	0.77764	0.59266	0.484395	0.959435	0.744775	0.83728	0.667635	1.28373	1.02073	1.05049	0.845415	0.82296	1.272
YGL240W	27 - YGL240W ... DOC1 mitotic sister chromatid segre enzyme regulator activity mitochondrion* | YGL241W	27	14	0.82384	0.41257	0.91542	0.74245	0.72559	0.89469	0.28095	0.829465	0.293935	0.454635	0.40317	0.460225	0.584185	0.995365	0.711475	0.780645	0.95757	0.6831
YLR199C	27 - YLR199C ˜ PBA1 biological process unknown molecular function unknown | Protein involved in 20S proteasome assembly; forms a heterodimer with Add66p that binds to proteasome precursors; similar to human PAC1 constituent of the PAC1-PAC2 complex involved in proteasome assemblyYLR200W	27	14	0.90698	0.71741	0.79346	0.58063	1.01141	0.52843	0.76525	0.385535	0.301095	0.492585	0.55055	0.569295	0.856105	0.771725	0.809725	0.812755	0.73191	1.22461
YHR200W	27 - YHR200W ... RPN10 ubiquitin-dependent protein ca endopeptidase activity proteasome complex (sensu Eukaryota | YHR201C	27	14	0.56628	0.32209	0.55913	0.07789	0.64259	0.55146	0.63927	0.357015	0.343255	0.380705	0.57755	0.635875	1.14898	0.648205	1.0913	0.627025	0.88102	0.82365
YER003C	27 - YER003C ... PMI40 protein amino acid glycosylati mannose-6-phosphate isomerase activcytoplasm* | YER004W	27	14	0.50332	0.58455	0.50905	0.62618	0.81587	0.37728	0.61387	0.947185	0.493455	0.421235	0.40796	0.663385	0.910525	1.00019	0.966205	0.888255	1.14262	0.91188
YFL036W	27 - YFL036W ... RPO41 mitochondrial genome maintenan DNA-directed RNA polymerase activitmitochondrial matrix* | YFL037W	27	14	0.41393	0.41307	0.23502	0.47002	0.5091	0.58886	0.51948	0.835755	0.489765	0.247565	0.3496	0.481425	0.656295	0.860285	0.739365	0.719415	1.04606	0.70534
YDR168W	27 - YDR168W ... CDC37 signal transduction* unfolded protein binding cytoplasm | YDR169C	27	14	0.58021	0.52873	0.66491	0.56725	0.28842	0.57471	0.63698	0.721025	0.821355	0.637805	0.82855	0.576875	1.02045	0.938175	0.992055	0.693285	0.82432	0.75234
YGR100W	27 - YGR100W ... MDR1 biological process unknown Rab GTPase activator activity cytoplasm* | YGR101W	27	14	0.65108	0.43143	0.58261	0.45091	0.51222	0.49609	0.75357	1.15088	0.591895	0.592505	0.59452	0.838655	0.748415	1.27641	0.985365	0.688485	1.02768	0.92796
YKL215C	27 - YKL215C ... YKL215C biological process unknown molecular function unknown cytoplasm | YKL216W	27	14	0.50309	0.35858	0.52352	0.5536	0.49607	0.50137	0.67125	1.06387	0.785125	0.694465	0.46908	0.711315	0.770995	1.05699	0.875275	0.708865	1.07153	1.1533
YML092C	27 - YML092C ... PRE8 ubiquitin-dependent protein ca endopeptidase activity "proteasome core complex, alpha-subu" | YML093W	27	14	0.73992	0.53664	0.82993	0.65542	0.78616	0.59002	0.80965	0.756525	0.399745	0.727475	0.72748	0.752475	1.0833	1.00344	1.23745	0.776495	0.91629	1.20382
YGL011C	27 - YGL011C ... SCL1 ubiquitin-dependent protein ca endopeptidase activity mitochondrion* | YGL012W	27	14	0.69628	0.50066	0.63542	0.51988	0.58851	0.59066	0.4374	0.782375	0.562665	0.560815	0.54449	0.677535	0.974745	0.743035	0.924355	0.675715	0.90177	0.75678
YFL044C	27 - YFL044C ˜ iESR cluster OTU1 (YOD1) | Deubiquitylation enzyme that binds to the chaperone-ATPase Cdc48p; may contribute to regulation of protein degradation by deubiquitylating substrates that have been ubiquitylated by Ufd2p; member of the Ovarian Tumor (OTU) familyYFL045C	27	14	0.38664	0.11682	0.16379	0.37502	0.56205	0.28941	0.66403	0.647255	0.421825	0.577105	0.58995	0.693315	0.841105	0.946815	0.868075	0.902275	1.03175	0.69454
YLR024C	27 - YLR024C ... UBR2 protein monoubiquitination* ubiquitin-protein ligase activity cytoplasm | YLR025W	27	14	0.39765	0.41772	0.12586	0.43511	0.56373	0.48214	0.6515	0.635725	0.567195	0.662735	0.55921	0.664085	0.910405	1.27239	0.967015	0.956565	1.07807	1.03115
YDL097C	27 - YDL097C ... RPN6 ubiquitin-dependent protein ca structural molecule activity "proteasome regulatory particle, lid" | YDL098C	27	14	0.60954	0.56874	0.40796	0.55565	0.41291	0.57228	0.3887	0.520705	0.635595	0.289625	0.41819	0.634265	0.995775	0.888985	1.09434	0.677255	0.99547	0.89231
YBL041W	27 - YBL041W ... PRE7 ubiquitin-dependent protein ca endopeptidase activity "proteasome core complex, beta-subun" | YBL042C	27	14	0.55043	0.40857	0.40996	0.38282	0.54114	0.63339	0.27634	0.528055	0.487635	0.589255	0.50307	0.566885	0.932775	0.821615	1.0597	0.706725	0.8235	0.61352
YER068W	27 - YER068W ... MOT2 regulation of transcription fr 3'-5'-exoribonuclease activity* cytoplasm* | YER069W	27	14	0.62656	0.49863	0.59015	0.41985	0.50332	0.81064	0.6156	0.413925	0.438765	0.607015	0.40299	0.614355	1.02128	0.904415	1.12255	0.784245	0.86619	0.87337
YDR477W	27 - YDR477W ... SNF1 protein amino acid phosphoryla AMP-activated protein kinase activicytoplasm* | YDR478W	27	14	0.82642	0.65851	0.76668	0.597	0.66085	0.7351	0.56071	0.704575	0.435445	0.678995	0.57418	0.639185	1.13531	1.14365	1.09713	0.944685	1.22081	1.05511
YGL163C	27 - YGL163C ... RAD54 chromatin remodeling* DNA-dependent ATPase activity* nucleus | YGL164C	27	14	0.76002	0.72218	0.71959	0.77614	0.67455	0.79025	0.55345	0.853115	0.658135	0.477145	0.79098	0.631725	0.953625	1.11231	0.925205	0.868115	1.04688	1.0981
YLR429W	27 - YLR429W ... CRN1 actin filament organization* "protein binding, bridging*" actin cortical patch | YLR430W	27	14	0.57608	0.48657	0.72289	0.3776	0.44338	0.46887	0.27555	0.640185	0.425795	0.332435	0.4179	0.401205	1.04173	0.863005	0.884655	0.812015	0.83822	0.96378
YLR387C	27 - YLR387C ... REH1 biological process unknown* molecular function unknown cytoplasm | YLR388W	27	14	0.83213	0.44154	0.79025	0.49915	0.65324	0.70031	0.52595	0.159245	0.323445	0.495985	0.4554	0.483925	1.00642	0.848005	1.04652	0.600465	1.06889	0.773
YGL048C	27 - YGL048C ... RPT6 ubiquitin-dependent protein ca ATPase activity* nucleus* | YGL049C	27	14	0.49232	0.35265	0.68093	0.45649	0.5483	0.48225	0.37609	0.637725	0.582915	0.464865	0.52301	0.812785	1.13523	1.0593	1.02631	0.770685	1.09296	0.90299
YMR314W	27 - YMR314W ... PRE5 ubiquitin-dependent protein ca endopeptidase activity "proteasome core complex, alpha-subu" | YMR315W	27	14	0.82502	0.34423	0.50475	0.50493	0.70573	0.40167	0.44954	0.538295	0.333185	0.484435	0.56707	0.617665	0.932615	1.10299	1.14478	0.751755	1.23868	0.84617
YPR024W	27 - YPR024W ... YME1 mitochondrion organization and ATP-dependent peptidase activity mitochondrion* | YPR025C	27	14	0.52908	0.49657	0.67648	0.34372	0.6053	0.49723	0.47015	0.768445	0.479715	0.242855	0.40648	0.526675	0.703585	0.878985	0.717865	0.644305	0.82564	0.98018
YPR108W	27 - YPR108W ... RPN7 ubiquitin-dependent protein ca structural molecule activity "proteasome regulatory particle, lid" | YPR108W-A	27	14	0.35021	0.26579	0.25927	0.26276	0.30504	0.49772	0.60642	0.653745	0.515765	0.683105	0.58466	0.684255	1.22005	0.903925	1.08007	0.537525	0.88175	0.75644
YBR229C	27 - YBR229C ... ROT2 cell wall biosynthesis (sensu alpha-glucosidase activity mitochondrion* | YBR230C	27	14	0.25779	0.12743	0.16769	0.30407	0.32638	0.26958	0.50943	0.860035	0.304245	0.431945	0.5908	0.563205	0.707775	1.00571	1.01242	0.901725	1.04345	0.90541
YFR052W	27 - YFR052W ... RPN12 ubiquitin-dependent protein ca endopeptidase activity "proteasome regulatory particle, lid" | YFR053C	27	14	0.73259	0.64594	0.85284	0.58013	0.12301	0.85704	0.79844	0.334795	0.505665	0.256135	0.49035	0.390805	0.878015	0.803815	1.05974	0.667025	1.03064	0.85143
YFR010W	27 - YFR010W ... UBP6 protein deubiquitination ubiquitin-specific protease activitproteasome regulatory particle (sen | YFR011C	27	14	0.63599	0.55283	0.65029	0.64601	0.50412	0.81458	0.54772	0.257235	0.748215	0.598145	0.80118	0.810515	1.09257	1.08862	1.31259	0.812745	0.83648	0.68332
YAL007C	27 - YAL007C ... ERP2 ER to Golgi transport molecular function unknown COPII-coated vesicle | YAL008W	27	14	0.73512	0.78229	0.63767	0.67242	0.42734	0.7169	0.4837	0.565525	0.718065	0.603265	0.61248	0.784145	0.836995	1.17809	0.975775	1.14471	0.7132	1.06705
YOR157C	27 - YOR157C ... PUP1 ubiquitin-dependent protein ca endopeptidase activity "proteasome core complex, beta-subun" | YOR158W	27	14	0.19509	0.38434	0.6408	0.44993	0.49692	0.43407	0.55979	0.609985	0.569995	0.659935	0.7913	0.840535	1.01026	1.02974	1.16439	0.685705	1.32531	1.28576
YOR362C	27 - YOR362C ... PRE10 ubiquitin-dependent protein ca endopeptidase activity "proteasome core complex, alpha-subu" | YOR363C	27	14	0.3987	0.45142	0.68935	0.50679	0.88971	0.33633	0.17242	0.374365	0.500515	0.382115	0.64567	0.693045	1.03853	1.04896	1.02869	0.874565	0.8992	0.76006
YCL030C	27 - YCL030C ... HIS4 histidine biosynthesis phosphoribosyl-ATP diphosphatase acintracellular | YCL031C	27	14	0.2873	0.27473	0.10517	0.08977	0.61102	0.18491	0.77365	1.0011	0.468235	0.222585	0.70069	0.713765	1.18014	1.31437	0.842175	0.336475	0.80293	0.93302
YGL249W	27 - YGL249W ... ZIP2 synaptonemal complex formation molecular function unknown synaptonemal complex | YGL250W	27	14	0.11934	0.78682	-0.09826	0.58452	0.22858	0.52107	0.63037	0.625665	0.388215	0.384445	0.13803	0.552585	0.907475	0.805455	0.837535	0.993785	0.80994	0.98359
YJL152W	27 - YJL152W ... | YJL153C	27	14	0.42071	-0.18896	0.31372	0.62359	0.53322	0.73078	0.68557	0.517205	0.679885	0.510875	0.59623	0.371215	0.772105	0.889685	0.932335	1.11825	1.27872	0.79436
YMR092C	29 - YMR092C ... AIP1 response to osmotic stress* protein binding cytoplasm* | YMR093W	29	15	0.72147	0.51689	0.5658	0.76414	0.53835	0.78401	0.84004	1.17348	0.795695	0.799795	0.60533	0.875125	1.26999	1.58045	1.54367	1.35786	1.95438	1.76173
YHR071W	29 - YHR071W ... PCL5 cell cycle cyclin-dependent protein kinase regcyclin-dependent protein kinase hol | YHR072W	29	15	0.84966	0.84988	0.68118	0.55133	1.07704	0.89097	0.67446	0.518675	0.126865	0.815645	0.91535	0.657545	1.65508	1.02439	1.44884	1.00872	1.50336	1.72512
YJL221C	29 - YJL221C ... FSP2 biological process unknown alpha-glucosidase activity cellular component unknown | YJL222W	29	15	0.92614	1.12258	0.7969	0.91549	0.80754	1.0957	0.77802	0.958455	1.06947	1.15526	0.59743	0.818155	0.893935	1.59017	1.71091	1.64061	1.18725	1.678
YDR009W	29 - YDR009W ... GAL3 regulation of transcription, D protein binding cytoplasm | YDR010C	29	15	0.51044	1.2081	0.50484	0.61634	0.7297	0.95453	0.75605	1.05855	0.280525	1.09597	0.37028	0.801805	1.17677	1.65997	1.17796	1.71653	1.29879	1.72841
YOL157C	29 - YOL157C ... YOL157C biological process unknown molecular function unknown cellular component unknown | YOL158C	29	15	0.64325	0.97269	0.72165	0.98944	0.80987	1.13759	0.64725	0.727905	0.489875	1.12027	0.45767	0.760315	1.01483	1.67685	1.74016	1.89253	1.33184	1.8947
YER012W	29 - YER012W ... PRE1 response to stress* endopeptidase activity nucleus* | YER013W	29	15	0.81975	0.73004	0.95569	0.68354	0.85099	0.65143	0.52004	0.925135	0.698365	0.462145	0.73713	0.757375	1.25585	1.20755	1.43186	1.22243	1.66178	0.74467
YKL062W	29 - YKL062W ... MSN4 response to stress* DNA binding* cytoplasm* | YKL063C	29	15	1.10917	1.06285	0.97722	0.76491	1.19788	1.10356	0.80855	0.938075	0.340695	0.990735	0.70133	0.778015	1.43061	1.39152	1.72324	1.71508	1.86114	1.38226
YLR273C	29 - YLR273C ... PIG1 regulation of glycogen biosynt protein phosphatase regulator activprotein phosphatase type 1 complex | YLR274W	29	15	0.31609	0.59699	0.55767	0.48457	0.54115	1.07544	1.04429	1.30384	0.559375	1.30941	0.93221	1.0714	1.47517	1.87821	1.57994	1.93792	1.60569	2.0303
YFR050C	29 - YFR050C ... PRE4 ubiquitin-dependent protein ca endopeptidase activity "proteasome core complex, beta-subun" | YFR051C	29	15	0.64276	0.55791	0.6314	0.51791	0.60123	0.46256	0.79785	0.696625	0.623055	0.905945	0.79176	0.925375	1.1744	1.2665	1.36547	0.984095	1.32345	1.46817
YEL071W	29 - YEL071W ... DLD3 lactate metabolism D-lactate dehydrogenase (cytochromecytoplasm* | YEL072W	29	15	1.11922	1.01411	1.08109	1.09814	1.328	1.21158	1.43845	1.34135	0.929745	1.29339	1.11575	1.4116	1.76666	1.77391	1.70714	1.37058	1.76992	1.67776
YER096W	29 - YER096W ... SHC1 sporulation (sensu Fungi)* enzyme activator activity prospore membrane | YER097W	29	15	0.71545	1.3089	0.75157	0.90274	1.11492	1.27329	1.25026	1.55819	1.11007	1.59164	1.24116	1.14156	1.59	1.89024	1.50517	1.74727	1.73951	1.7061
YCL057W	29 - YCL057W ... PRD1 proteolysis and peptidolysis metalloendopeptidase activity* cytoplasm* | YCL058C	29	15	0.56331	0.51543	0.39538	0.53009	0.65179	0.71557	1.13038	1.48459	0.785935	0.930395	0.82305	1.14716	1.30804	1.47524	1.44358	1.03625	1.84606	1.60518
YCR069W	29 - YCR069W ... CPR4 biological process unknown peptidyl-prolyl cis-trans isomerasemembrane | YCR071C	29	15	0.85497	0.91302	0.98097	0.93289	1.29925	0.94422	1.09526	0.928485	0.868055	1.10976	1.22562	1.1164	1.2894	1.17925	1.37224	1.22382	1.1828	1.41658
YER027C	29 - YER027C ... GAL83 protein amino acid phosphoryla AMP-activated protein kinase activinucleus | YER028C	29	15	0.97611	0.74159	0.88396	0.70681	1.03369	1.05811	0.9921	1.28919	0.854295	1.12732	0.79691	1.28561	1.18712	1.46453	1.51761	1.29358	1.47805	1.52916
YDR394W	29 - YDR394W ... RPT3 ubiquitin-dependent protein ca ATPase activity* "proteasome regulatory particle, bas" | YDR395W	29	15	0.85412	0.70038	0.8817	0.84366	0.84007	0.86642	0.68719	1.12074	0.777025	0.771085	0.81174	1.12848	1.35308	1.35312	1.28883	1.18192	1.37255	1.31611
YER143W	29 - YER143W ... DDI1 ubiquitin-dependent protein ca SNARE binding plasma membrane | YER144C	29	15	1.05978	0.9207	0.82175	0.86479	0.75279	1.05053	1.12923	1.27405	1.15864	1.50713	1.39826	1.49649	1.54365	1.45978	1.86098	1.44861	1.7042	1.63063
YJL060W	29 - YJL060W ... BNA3 NAD biosynthesis arylformamidase activity cytoplasm* | YJL061W	29	15	0.8557	0.81254	0.86701	1.11801	0.96714	0.59754	1.02194	1.05065	0.847215	1.02314	1.24261	1.04943	1.2612	1.25189	1.37922	1.05306	1.5058	1.63778
YMR054W	29 - YMR054W ... STV1 vacuolar acidification hydrogen-transporting ATPase activiGolgi apparatus* | YMR055C	29	15	1.00305	0.95268	0.95428	1.03453	1.13853	0.66552	0.96009	1.39802	1.00551	1.01076	1.15544	1.06461	1.47995	1.59492	1.63122	1.04231	1.64305	1.45823
YGL141W	29 - YGL141W ... HUL5 protein monoubiquitination* ubiquitin-protein ligase activity cytoplasm* | YGL142C	29	15	1.09371	1.09512	0.95062	1.07448	1.08309	1.1766	1.17678	1.32905	0.858075	1.34143	1.01119	1.32824	1.20603	1.55631	1.41151	1.29544	1.4442	1.63494
YPR115W	29 - YPR115W ... YPR115W biological process unknown molecular function unknown cytoplasm | YPR116W	29	15	0.8597	0.93955	1.01322	0.6765	0.66466	0.81023	0.91071	1.118	1.15514	1.08068	0.93409	1.06871	1.09102	1.18175	1.1903	1.04828	1.18728	1.26622
YDR470C	29 - YDR470C ... UGO1 transport* transporter activity mitochondrial outer membrane | YDR471W	29	15	0.81089	0.55278	0.80912	0.71582	0.87188	0.72379	1.31114	1.31906	0.874075	1.33777	1.35088	1.14806	1.25768	1.21086	1.26324	1.20751	1.52628	1.71329
YLL040C	29 - YLL040C ... VPS13 sporulation (sensu Fungi)* molecular function unknown mitochondrion* | YLL041C	29	15	0.5895	0.40704	0.43003	0.30377	0.6542	0.61413	1.2163	1.29197	1.10122	1.17277	0.98481	1.11221	1.1198	1.4381	1.43498	1.18213	1.38889	1.58649
YER177W	29 - YER177W ... BMH1 sporulation (sensu Fungi)* protein binding* nucleus | YER178W	29	15	0.71649	0.36315	0.56736	0.27478	1.10193	0.34845	1.06734	0.852135	0.845365	1.12641	1.19045	0.916675	1.36006	1.24596	1.3394	1.02839	1.20355	1.20871
YBR173C	29 - YBR173C ... UMP1 ubiquitin-dependent protein ca proteasome activator activity cytoplasm* | YBR174C	29	15	0.89705	0.74893	0.74066	0.72999	0.4474	1.00056	1.20225	0.334895	1.04635	1.12058	1.1116	0.943365	1.49456	1.23699	1.45612	1.47184	0.95716	1.37419
YGR258C	29 - YGR258C ... RAD2 nucleotide-excision repair, DN single-stranded DNA specific endodenucleotide excision repair factor 3 | YGR259C	29	15	0.65922	0.75962	0.77561	0.48462	0.57844	0.92215	0.74906	0.987315	1.08683	0.966305	0.98064	0.680945	1.46778	1.69681	1.29636	1.17193	1.30982	1.32307
YDR263C	29 - YDR263C ... DIN7 DNA repair nuclease activity mitochondrion | YDR264C	29	15	0.48496	0.83355	0.74091	0.72202	0.61066	1.12479	0.82564	1.16366	0.979445	1.17081	0.76556	0.910055	1.20687	1.77195	1.29123	1.57374	1.09056	1.26432
YHL016C	29 - YHL016C ... DUR3 urea transport urea transporter activity plasma membrane | YHL017W	29	15	0.49341	0.85167	0.5104	0.7914	0.83472	0.84423	0.85175	1.04005	0.863005	1.18294	0.73224	1.00425	1.08218	1.46578	1.01802	1.43023	1.24956	1.54692
YOR125C	29 - YOR125C ... CAT5 ubiquinone metabolism molecular function unknown mitochondrial inner membrane | YOR126C	29	15	0.85171	0.75082	0.96341	1.04033	0.59569	0.43471	1.37542	1.34357	1.13156	1.27936	1.47819	1.1983	1.54974	1.72042	1.71256	1.60798	1.66832	1.69415
YGL038C	29 - YGL038C ... OCH1 N-linked glycosylation "transferase activity, transferring"Golgi cis cisterna | YGL039W	29	15	0.82428	0.47486	0.9883	0.50099	1.06489	0.7195	0.98361	0.864805	0.711085	1.32583	0.85652	1.23073	1.04761	1.14772	1.49106	1.20269	1.29104	1.49213
YNL241C	29 - YNL241C iESR cluster ZWF1 pentose-phosphate shunt glucose-6-phosphate 1-dehydrogenasecytoplasm | YNL242W	29	15	0.65157	0.5763	0.63953	0.50758	0.85654	0.55836	1.16916	0.950365	0.652415	0.766265	1.41816	0.814625	1.31988	1.17033	1.24629	0.898195	1.48674	1.54306
YHR209W	29 - YHR209W ˜ CRG1 biological process unknown S-adenosylmethionine-dependent | Putative S-adenosylmethionine-dependent methyltransferase; mediates cantharidin resistanceYHR210C	29	15	0.52426	0.48457	0.58625	0.56489	0.88625	0.88407	1.25201	1.241	0.674645	1.5254	1.25171	1.01195	1.35922	1.7771	1.08681	1.01601	1.17661	1.18538
YMR284W	29 - YMR284W ... YKU70 chromatin assembly or disassem RNA binding* nuclear membrane* | YMR285C	29	15	0.86633	0.42635	0.75057	0.61014	0.54742	0.96715	0.83098	1.03408	0.719885	1.55967	1.09373	0.991305	1.23487	1.52401	1.30607	1.1624	1.02296	1.04463
YNL249C	29 - YNL249C ... MPA43 biological process unknown molecular function unknown mitochondrion | YNL250W	29	15	0.98581	0.85168	0.72555	1.16973	1.12804	0.89329	0.61818	0.958255	0.894605	0.813065	0.55656	1.16681	1.07306	1.53191	1.4248	1.07632	1.49411	1.47272
YGL194C-A	29 - YGL194C-A YGL194C-A YKL023C-A	29	15	0.49845	0.62415	0.63807	0.6431	1.1326	0.80502	0.85907	1.29713	1.32669	1.45046	1.39262	1.3073	1.49554	0.982835	1.37532	1.27916	1.10347	1.50923
YOR259C	26 - YOR259C ... RPT4 ubiquitin-dependent protein ca ATPase activity* nucleus* | YOR260W	26	16	0.24605	0.32466	0.26459	0.19525	0.15462	0.34783	0.22886	0.527065	0.477485	0.237575	0.39504	0.260525	0.688005	0.555585	0.638975	0.424025	0.65061	0.59576
YKL190W	26 - YKL190W ... CNB1 cell wall organization and bio calcium ion binding* cytoplasm* | YKL191W	26	16	0.1496	0.12792	0.15644	0.04588	0.23483	0.23013	0.56748	0.406215	0.195795	0.233355	0.29327	0.259405	0.370665	0.321975	0.444945	0.324325	0.41773	0.54409
YLR433C	26 - YLR433C PAC cluster CNA1 cell wall organization and bio calcium-dependent protein serine/thcytoplasm* | YLR434C	26	16	0.16832	-0.03257	0.07586	-0.00574	0.12528	0.14032	0.13597	0.359785	0.289885	0.162625	0.153	0.149835	0.503775	0.568785	0.569885	0.625005	0.62051	0.68199
YIL151C	26 - YIL151C ... YIL151C biological process unknown molecular function unknown cellular component unknown | YIL152W	26	16	0.07662	0.19384	-0.02239	0.09486	0.41868	0.28075	0.31096	0.561195	0.394645	0.221385	0.20024	0.497505	0.342425	0.650335	0.581435	0.493565	0.46941	0.59262
YPR032W	26 - YPR032W ... SRO7 exocytosis* molecular function unknown cytosol* | YPR033C	26	16	0.17493	0.20624	0.10835	0.12078	0.33587	0.27232	0.20976	0.583745	0.182855	0.341585	0.18357	0.270285	0.326675	0.629825	0.514525	0.464405	0.46173	0.71227
YOR171C	26 - YOR171C ... LCB4 sphingolipid metabolism* D-erythro-sphingosine kinase activiendoplasmic reticulum* | YOR172W	26	16	0.16058	0.03415	0.12978	0.34612	0.23877	0.26563	0.23492	0.386625	0.155915	0.373925	0.2519	0.454445	0.607045	0.541605	0.617585	0.477275	0.4258	0.71253
YLR077W	26 - YLR077W ... FMP25 biological process unknown molecular function unknown mitochondrion | YLR078C	26	16	0.11359	0.17123	0.09594	-0.03715	0.05448	0.27492	0.32127	0.430665	0.451355	0.262455	0.39322	0.398895	0.527945	0.559325	0.548155	0.381485	0.66714	0.48468
YMR275C	26 - YMR275C ... BUL1 mitochondrion inheritance* protein binding* plasma membrane* | YMR276W	26	16	0.21609	0.04367	0.11476	-0.07733	0.05294	0.10524	0.45106	0.610345	0.332165	0.502025	0.41245	0.590825	0.587255	0.451305	0.645565	0.545755	0.66492	0.48421
YGL091C	26 - YGL091C ... NBP35 biological process unknown ATPase activity nucleus | YGL092W	26	16	0.22501	0.03159	0.31969	0.34321	0.29089	-0.18531	0.1711	0.260745	0.289205	0.047165	0.3112	0.355735	0.606715	0.727905	0.623775	0.507045	0.96423	1.05876
YGL124C	26 - YGL124C ... MON1 protein-vacuolar targeting* molecular function unknown cytosol* | YGL125W	26	16	-0.00102	-0.07497	-0.00774	0.25223	0.11012	0.34928	0.17196	0.603035	0.112715	0.195155	0.06634	0.436005	0.572265	0.827235	0.432685	0.620305	0.57866	0.6732
YBL022C	26 - YBL022C ... PIM1 proteolysis and peptidolysis* ATP-dependent peptidase activity mitochondrial matrix | YBL023C	26	16	0.19775	0.27627	0.12578	-0.02405	0.19606	0.3417	0.05669	0.104315	0.263495	0.332155	0.19855	0.190585	0.895935	0.775375	0.917165	0.461165	0.85542	0.79178
YML007W	26 - YML007W ... YAP1 response to oxidative stress* transcription factor activity cytoplasm* | YML008C	26	16	0.18603	0.21334	-0.06417	-0.04331	-0.0393	0.11363	0.201	0.360115	0.443385	0.403355	0.25207	0.423925	0.801045	0.691635	0.847595	0.493295	0.49301	0.46932
YHL034C	26 - YHL034C ... SBP1 RNA metabolism RNA binding nucleolus | YHL034W-A	26	16	0.14926	0.17254	0.04675	0.07666	0.24397	0.35926	0.11304	0.557615	0.503025	0.413265	0.34604	0.272285	0.657075	0.542195	0.697415	0.395915	1.11253	0.37013
YFR044C	26 - YFR044C ˜ DUG1 biological process unknown molecular function unknown | Cys-Gly metallo-di-peptidase; forms a complex with Dug2p and Dug3p to degrade glutathione (GSH) and other peptides containing a gamma-glu-X bond in an alternative pathway to GSH degradation by gamma-glutamyl transpeptidase (Ecm38p)YFR045W	26	16	0.06267	-0.02786	0.04923	0.15467	0.21098	-0.09025	0.37665	0.447165	0.370055	0.152905	0.47791	0.325385	0.386565	0.167875	0.453515	0.520255	0.71005	0.55598
YGL185C	26 - YGL185C ... YGL185C metabolism "oxidoreductase activity, acting on"cytoplasm | YGL186C	26	16	-0.10412	0.03843	0.068	-0.05115	0.12701	0.12766	0.12747	0.720375	0.342875	0.711675	0.35601	0.540345	0.365665	0.848775	0.359065	0.666245	0.33161	0.50841
YDR386W	26 - YDR386W ... MUS81 DNA repair* endonuclease activity nucleus | YDR387C	26	16	-0.11784	0.20343	-0.03089	0.21866	-0.00233	0.42272	0.44734	0.528465	0.316175	0.735055	0.26739	0.564415	0.515075	0.714125	0.536355	0.512605	0.23573	0.24599
YKL157W	26 - YKL157W ... APE2 peptide metabolism leucyl aminopeptidase activity cytoplasm* | YKL159C	26	16	0.24547	-0.12265	0.03439	0.15106	0.14109	0.09606	0.48952	0.740705	0.369445	0.373545	0.34278	0.518405	0.277365	0.608945	0.363055	0.371585	0.77824	0.64798
YKL010C	26 - YKL010C ... UFD4 protein monoubiquitination* ubiquitin-protein ligase activity cytoplasm* | YKL011C	26	16	0.10685	-0.11902	-0.01705	0.01816	0.1697	0.05047	0.34446	0.764415	0.182175	0.336825	0.31023	0.571335	0.244605	0.597725	0.369665	0.508585	0.60915	0.78899
YKR001C	26 - YKR001C ... VPS1 protein-vacuolar targeting* GTPase activity cytoplasm* | YKR002W	26	16	0.12165	-0.09279	-0.00068	0.02311	0.05207	0.14134	0.46213	0.389555	0.058985	0.450995	0.27415	0.554825	0.599095	0.763795	0.477225	0.748615	0.59947	0.66336
YKR018C	26 - YKR018C ... YKR018C biological process unknown molecular function unknown cytoplasm* | YKR019C	26	16	0.04309	-0.07986	0.21393	-0.02072	0.37688	-0.08882	0.45554	0.701255	0.155145	0.137235	0.26795	0.445145	0.479935	0.724185	0.675315	0.631115	0.64776	0.90573
YNL243W	26 - YNL243W ... SLA2 cell wall organization and bio "protein binding, bridging" actin cortical patch* | YNL244C	26	16	0.02108	-0.18608	0.07255	-0.23409	0.10286	-0.06303	0.29391	0.623235	0.407315	0.244535	0.41979	0.567655	0.664025	0.754915	0.743375	0.425385	0.85482	0.81584
YNL287W	26 - YNL287W ... SEC21 ER to Golgi transport* molecular function unknown COPI vesicle coat | YNL288W	26	16	-0.03476	0.02723	-0.15111	-0.01699	0.10119	-0.00999	0.32055	0.776945	0.200825	0.387025	0.14352	0.331065	0.509525	0.728875	0.734885	0.551075	0.70913	0.6039
YPR036W	26 - YPR036W ... VMA13 vacuolar acidification hydrogen-transporting ATPase activivacuolar membrane (sensu Fungi)* | YPR036W-A	26	16	0.22905	0.0857	0.05222	0.05507	0.03625	0.03364	0.19224	0.537445	0.117005	0.479155	0.10888	0.599175	0.459975	0.786035	0.716805	0.501085	0.67347	0.66615
YLR354C	26 - YLR354C ... TAL1 pentose-phosphate shunt transaldolase activity cytoplasm | YLR355C	26	16	-0.14695	-0.26051	-0.29816	0.03966	-0.01719	-0.06783	0.48814	0.576585	0.118975	0.554205	0.40082	0.579815	0.679035	0.691435	0.707085	0.411425	0.62798	0.58783
YNL212W	26 - YNL212W ... VID27 biological process unknown molecular function unknown cytoplasm | YNL213C	26	16	0.2409	0.07239	0.03406	0.29151	0.08294	0.01252	0.30972	0.547565	0.369885	0.088925	0.35791	0.527065	0.540265	0.745585	0.738165	0.629725	0.63353	0.49301
YMR237W	26 - YMR237W ... BCH1 biological process unknown molecular function unknown clathrin-coated vesicle | YMR238W	26	16	0.25136	0.03799	0.19909	0.08555	0.26502	0.29282	0.57929	0.770635	0.174995	0.397085	0.17385	0.505995	0.368025	0.563885	0.661725	0.396515	0.74447	0.53666
YKL164C	26 - YKL164C ... PIR1 cell wall organization and bio structural constituent of cell wallcell wall (sensu Fungi) | YKL165C	26	16	0.25198	-0.1334	-0.32559	-0.02109	0.62579	-0.20833	0.44772	0.391495	0.074135	0.402315	0.50563	0.418265	0.403705	0.448855	0.604125	0.375625	0.79102	0.40798
YER116C	26 - YER116C ... SLX8 DNA recombination DNA binding nucleus | YER117W	26	16	-0.16044	0.18277	-0.25823	-0.09733	0.17474	0.3559	0.21224	0.346275	0.403875	0.303185	0.33882	0.188745	0.864955	0.799515	0.371705	0.560685	0.43149	0.73978
YKL095W	26 - YKL095W ... YJU2 nuclear mRNA splicing, via spl molecular function unknown nucleus | YKL096C-B	26	16	0.097	0.36437	0.13188	-0.03773	-0.14876	0.12686	-0.0316	-0.035635	0.647905	0.563445	0.30883	0.048795	0.943775	0.765415	0.810005	0.570055	0.55405	0.36637
YKL117W	26 - YKL117W ... SBA1 protein folding chaperone binding cytoplasm* | YKL118W	26	16	0.16929	-0.13077	0.0524	0.21986	0.12202	0.41519	0.41745	0.446935	0.299825	0.083945	0.31883	0.067855	0.655275	0.706245	0.707205	0.291955	1.14267	0.26003
YOR041C	26 - YOR041C ... | YOR042W	26	16	-0.27815	0.37894	-0.21927	0.10893	0.20826	0.08126	0.56702	0.555885	0.341445	0.519205	0.70983	-0.038555	0.534155	0.401905	0.451495	0.980575	0.65467	0.53119
YJR149W	26 - YJR149W ... YJR149W biological process unknown molecular function unknown cytoplasm | YJR150C	26	16	0.04995	0.11072	-0.30053	-0.36092	0.3524	0.12424	0.53125	0.494065	0.120755	0.731105	0.55875	0.722095	0.402345	0.548315	0.453165	0.498045	0.62934	0.81682
YLR019W	26 - YLR019W ... PSR2 response to stress phosphoprotein phosphatase activityplasma membrane | YLR020C	26	16	0.35463	0.21465	0.28765	0.03099	0.24013	0.25406	0.81154	0.371295	0.379895	0.753365	0.44695	0.490025	0.598025	0.426625	0.726765	0.578215	0.84441	0.84668
YKL145W	26 - YKL145W ... RPT1 ubiquitin-dependent protein ca ATPase activity* "proteasome regulatory particle, bas" | YKL146W	26	16	0.47245	0.32786	0.31176	0.15994	0.44156	0.35097	0.29594	0.227095	0.300395	0.311055	0.5318	0.514205	0.704875	0.899185	0.748305	0.468335	0.97319	0.75683
YLR382C	26 - YLR382C ... NAM2 Group I intron splicing* mRNA binding* mitochondrion | YLR383W	26	16	0.54873	0.28791	0.42171	0.22615	0.49711	0.43758	0.29825	0.604395	0.365845	0.474315	0.46974	0.331775	0.733365	0.702165	0.605645	0.660415	0.742	0.6289
YDR294C	26 - YDR294C ... DPL1 sphingolipid metabolism* sphinganine-1-phosphate aldolase acendoplasmic reticulum | YDR295C	26	16	0.24581	0.0529	0.34867	0.12613	0.4862	0.28373	0.66812	0.575635	0.214705	0.374635	0.55303	0.542695	0.603725	0.834255	0.789475	0.511265	0.79859	0.88256
YNL071W	26 - YNL071W ... LAT1 pyruvate metabolism dihydrolipoyllysine-residue acetyltmitochondrion* | YNL072W	26	16	0.204	0.01927	0.14729	0.03191	0.42084	0.15402	0.70256	0.860135	0.301425	0.361955	0.42682	0.582435	0.719965	0.512675	0.678845	0.492855	0.73217	0.77951
YML048W	26 - YML048W ... GSF2 secretory pathway molecular function unknown cytoplasm* | YML049C	26	16	0.18026	0.19808	0.18777	0.30247	0.44264	0.12725	0.71959	0.614015	0.482485	0.426195	0.70727	0.406955	0.571045	0.601695	0.835945	0.604175	1.10577	0.74685
YGR092W	26 - YGR092W ... DBF2 protein amino acid phosphoryla protein serine/threonine kinase actbud neck* | YGR093W	26	16	0.12207	0.09863	0.24519	0.25806	0.29989	0.25899	0.56335	0.323195	0.258995	0.575325	0.51548	0.371045	0.758425	0.838855	0.960695	0.697905	0.83822	1.23914
YJR045C	26 - YJR045C ... SSC1 protein folding* ATPase activity* mitochondrion* | YJR046W	26	16	-0.00296	0.07055	0.05462	0.16459	0.19118	0.05916	0.47412	0.870675	0.487495	0.315265	0.44236	0.428045	0.751285	0.930125	0.681315	0.702105	0.9785	0.76953
YHR027C	26 - YHR027C ... RPN1 ubiquitin-dependent protein ca endopeptidase activity* cytoplasm* | YHR028C	26	16	0.07034	0.04198	0.01473	0.06426	0.18049	0.20515	0.27123	0.586035	0.282425	0.268725	0.29187	0.510035	0.810285	0.792145	0.740215	0.532495	1.05966	0.93476
YLR362W	26 - YLR362W ... STE11 protein amino acid phosphoryla MAP kinase kinase kinase activity cytoplasm | YLR363C	26	16	0.11934	0.19921	0.39676	0.25344	0.12172	0.32686	0.27614	0.635125	0.210755	0.483825	0.20642	0.376705	0.631415	0.766495	0.679075	0.799725	0.57447	0.83502
YHR098C	26 - YHR098C ... SFB3 ER to Golgi transport molecular function unknown endoplasmic reticulum* | YHR099W	26	16	0.21849	0.32242	0.23596	0.17684	0.25872	0.15619	0.51297	0.744825	0.309435	0.346765	0.21103	0.532465	0.554805	0.911665	0.703105	0.688245	0.54516	0.9391
YPL106C	26 - YPL106C ... SSE1 protein folding unfolded protein binding cytoplasm | YPL107W	26	16	0.27345	0.10774	0.03521	0.17234	0.49719	0.07829	0.49882	0.613055	0.264705	0.527865	0.2553	0.434435	0.576465	0.853005	0.598135	0.465375	0.80985	0.64867
YIL116W	26 - YIL116W ... HIS5 histidine biosynthesis histidinol-phosphate transaminase aintracellular | YIL117C	26	16	0.20842	0.18751	0.38288	0.44649	0.55451	0.27585	0.44736	0.429965	0.073675	0.074555	0.05368	0.233975	0.793745	0.598375	0.693925	0.573135	0.75615	0.85115
YGR167W	26 - YGR167W ... CLC1 endocytosis* structural molecule activity clathrin vesicle coat | YGR168C	26	16	0.28379	0.32523	0.03388	0.21594	0.18932	0.33689	0.3751	0.143565	0.391655	0.405755	0.6259	0.284815	0.927025	0.765445	0.917005	0.495335	0.75461	0.59905
YKL210W	26 - YKL210W ... UBA1 ubiquitin cycle ubiquitin activating enzyme activitcytoplasm* | YKL211C	26	16	0.05472	-0.19504	-0.0266	0.02601	0.20222	-0.10127	0.64201	1.07062	0.457815	0.308425	0.37752	0.666115	0.428135	0.797365	0.621915	0.486055	0.88668	0.70215
YEL031W	26 - YEL031W ... SPF1 protein amino acid glycosylati "ATPase activity, coupled to transme"mitochondrion* | YEL032W	26	16	-0.03859	0.16427	0.05155	0.30714	0.15131	0.02009	0.30136	0.809935	0.664455	0.167195	0.35082	0.484095	0.591895	0.891665	0.582095	0.643045	1.19728	0.8127
YOR099W	26 - YOR099W ... KTR1 O-linked glycosylation* "alpha-1,2-mannosyltransferase activ"Golgi apparatus | YOR100C	26	16	0.20209	0.30558	0.14047	0.4365	0.26103	-0.06638	0.50146	0.864375	0.530545	0.353695	0.30359	0.456975	0.437965	0.631345	0.740695	0.708085	0.93681	0.35249
YGL212W	26 - YGL212W ... VAM7 vesicle fusion* v-SNARE activity vacuolar membrane (sensu Fungi) | YGL213C	26	16	0.25371	0.27575	0.432	0.18022	0.46791	0.64497	0.2104	0.244505	0.493695	0.365205	0.23659	0.137655	0.604065	0.971095	0.509905	0.560115	0.66616	0.84611
YKL145W-A	26 - YKL145W-A ˜ Dubious Dubious open reading frame, unlikely to encode a protein; completely overlaps the verified essential gene RPT1; identified by expression profiling and mass spectrometryYKL156C-A	26	16	0.22639	0.35147	0.51112	0.27567	0.4655	0.39116	0.51468	0.436635	0.610535	-0.084365	0.42188	0.627745	0.861745	0.706035	0.628935	0.595855	0.65926	0.74674
YGR201C	26 - YGR201C iESR cluster YGR201C biological process unknown molecular function unknown cellular component unknown | YGR202C	26	16	0.21974	-0.30378	0.27614	0.12181	0.27986	-0.15985	0.76762	0.219055	0.554545	0.485345	0.70116	0.496265	0.148785	0.395245	0.519985	0.653935	0.75096	1.10963
YHR067W	26 - YHR067W ... HTD2 fatty acid biosynthesis 3-hydroxyacyl-[acyl-carrier proteinmitochondrion | YHR068W	26	16	0.25048	0.28904	0.21058	0.27433	0.28804	0.49131	0.41899	0.136025	0.335505	0.817425	0.36428	0.544075	0.469605	1.03845	0.604575	0.456665	0.88237	0.66832
YLR374C	26 - YLR374C ... | YLR375W	26	16	0.12285	-0.03033	0.25136	0.2683	-0.3228	0.28925	0.55209	0.306285	0.682025	0.314155	0.61871	0.251665	0.877815	0.596685	0.969325	0.828495	0.95085	1.02531
YOR163W	26 - YOR163W ... DDP1 diadenosine polyphosphate meta diphosphoinositol-polyphosphate dipcytoplasm* | YOR164C	26	16	0.17191	0.12314	-0.0673	-0.15483	0.23213	0.00839	0.61688	-0.207035	0.665055	0.308915	0.72778	0.266485	0.922265	0.802215	0.671975	0.676205	0.46515	0.59676
YKR031C	26 - YKR031C ... SPO14 sporulation (sensu Fungi)* phospholipase D activity endosome* | YKR032W	26	16	0.18485	0.1694	0.12108	0.06962	0.08412	0.25544	0.34837	0.716065	0.593615	0.436215	0.27058	0.501515	0.276005	0.554805	0.348885	0.241685	0.27536	0.2776
YBR140C	26 - YBR140C ... IRA1 sporulation (sensu Fungi)* Ras GTPase activator activity mitochondrion* | YBR141C	26	16	0.06319	0.01379	0.05002	0.26786	0.05294	0.04224	0.49513	0.726845	0.435195	0.382535	0.35018	0.414195	0.232525	0.446275	0.297605	0.503635	0.55062	0.43654
YGR077C	26 - YGR077C ... PEX8 peroxisome organization and bi peroxisome targeting sequence bindiperoxisomal membrane* | YGR078C	26	16	0.35887	0.32632	0.26559	0.2276	0.42967	0.27127	0.66904	0.576595	0.525065	0.671895	0.43536	0.519235	0.448825	0.522835	0.598045	0.506475	0.57376	0.53475
YAL023C	26 - YAL023C ... PMT2 O-linked glycosylation dolichyl-phosphate-mannose-protein endoplasmic reticulum | YAL024C	26	16	0.21195	0.42009	0.19899	0.27669	0.41537	0.13546	0.42668	0.691385	0.599745	0.315385	0.45248	0.372125	0.533245	0.391625	0.613655	0.472925	0.65582	0.61353
YIL005W	26 - YIL005W ... EPS1 protein-ER retention protein disulfide isomerase activitendoplasmic reticulum membrane | YIL006W	26	16	-0.00202	0.11714	0.10018	-0.00249	-0.07843	0.23211	0.55277	0.602595	0.575015	0.701935	0.59439	0.676925	0.402255	0.647485	0.708245	0.542315	0.47123	0.53622
YLR422W	26 - YLR422W ... YLR422W biological process unknown molecular function unknown cytoplasm | YLR423C	26	16	0.01513	-0.03561	0.05908	0.15257	0.10313	0.05826	0.59256	1.00736	0.482035	0.516305	0.41724	0.633825	0.222325	0.668155	0.498455	0.509075	0.61246	0.67322
YKL025C	26 - YKL025C ... PAN3 DNA repair* poly(A)-specific ribonuclease activcytoplasm* | YKL026C	26	16	0.02925	0.17079	0.13296	0.16475	-0.1012	0.35847	0.51167	0.800635	0.424175	0.760665	0.33698	0.744185	0.346825	0.608525	0.383755	0.523715	0.35525	0.79757
YPL140C	26 - YPL140C ... MKK2 protein amino acid phosphoryla MAP kinase kinase activity intracellular | YPL141C	26	16	0.26701	-0.02178	0.12104	0.21263	0.4268	0.25961	0.44879	0.663655	0.553385	0.634065	0.65331	0.601425	0.386515	0.661535	0.577995	0.581455	0.43132	0.30579
YJR126C	26 - YJR126C ... VPS70 protein-vacuolar targeting molecular function unknown cellular component unknown | YJR127C	26	16	0.07297	0.05213	0.30827	0.34154	0.26823	0.24278	0.53917	0.875485	0.571025	0.247805	0.48302	0.562085	0.303035	0.735105	0.534545	0.352185	0.61194	0.58945
YER080W	26 - YER080W ˜ AIM9 biological process unknown molecular function unknown mitochondrion | Putative protein of unknown function; the authentic, non-tagged protein is detected in highly purified mitochondria in high-throughput studies; null mutant displays elevated frequency of mitochondrial genome lossYER081W	26	16	0.17391	0.09608	0.29994	0.03504	-0.12846	0.3733	0.55404	0.603675	0.723085	0.516275	0.50753	0.563675	0.805075	0.613305	0.587415	0.314865	0.52313	0.55644
YCR088W	26 - YCR088W ... ABP1 establishment of cell polarity protein binding cytoplasm* | YCR089W	26	16	0.18957	0.02182	0.16251	-0.20881	0.31167	0.23557	0.67375	0.810585	0.566695	0.577605	0.6596	0.598065	1.04844	0.768555	0.856365	0.556545	0.88071	1.04411
YNL073W	26 - YNL073W ... MSK1 lysyl-tRNA aminoacylation lysine-tRNA ligase activity mitochondrion | YNL074C	26	16	0.31594	0.18949	0.23486	0.08154	0.2324	0.02107	0.69665	0.530005	0.370755	0.628655	0.56018	0.660155	0.764615	0.940935	0.865655	0.866115	0.80639	1.06324
YNL138W	26 - YNL138W ... SRV2 Ras protein signal transductio cytoskeletal protein binding* actin cortical patch | YNL138W-A	26	16	0.00177	-0.22676	-0.11029	-0.11542	0.18905	-0.03771	0.3178	0.682665	0.283345	0.302165	0.37301	0.337695	0.523135	0.488115	0.548845	0.331915	0.61594	0.66169
YPL091W	26 - YPL091W ... GLR1 response to oxidative stress glutathione-disulfide reductase actcytoplasm* | YPL092W	26	16	0.11003	-0.24066	0.06964	0.00211	0.23879	-0.02227	0.28586	0.801055	0.402655	0.348585	0.1742	0.491395	0.363745	0.369945	0.389075	0.496505	0.73825	0.4271
YLR348C	32 - YLR348C ... DIC1 dicarboxylic acid transport dicarboxylic acid transporter activmitochondrial membrane | YLR349W	32	17	0.46503	0.59001	0.52031	0.31788	1.2652	0.40876	1.01807	1.31882	0.952825	1.50602	1.62373	1.42698	3.38301	3.26256	3.14362	2.89064	3.33104	3.68213
YOR345C	32 - YOR345C ... | YOR346W	32	17	1.07456	1.13974	1.0041	0.83821	0.57783	1.01322	2.44361	2.12274	2.379	2.55578	1.70128	3.18777	4.28962	4.2066	4.17159	5.02705	4.51696	4.56363
YHR136C	32 - YHR136C ... SPL2 response to temperature enzyme inhibitor activity cytoplasm | YHR137C-A	32	17	-0.97244	-0.86265	-0.46971	-0.61813	-1.01704	-1.27819	1.75296	1.10523	1.86433	2.10677	1.95775	2.17921	4.17502	4.41997	4.13065	4.39992	4.86804	4.38491
YDR042C	32 - YDR042C ... YDR042C biological process unknown molecular function unknown cellular component unknown | YDR043C	32	17	-0.34244	0.45317	0.17443	0.42152	-0.0034	0.20291	3.12355	2.47038	2.28532	3.0731	2.51719	3.27717	2.09728	2.75213	2.90467	3.96251	2.62895	2.52393
YHR033W	32 - YHR033W ... YHR033W biological process unknown molecular function unknown cytoplasm | YHR034C	32	17	-0.27736	-0.20012	-0.42451	-0.35627	0.03456	-0.17038	2.27904	2.08306	1.5152	2.72083	2.35541	2.10569	2.8032	2.82335	2.5656	3.08586	2.74099	2.9594
YOR382W	32 - YOR382W ... FIT2 siderophore transport molecular function unknown cell wall (sensu Fungi) | YOR383C	32	17	0.50686	0.73745	0.26128	0.74995	0.98231	1.19932	-0.51371	-0.544115	-0.559605	-0.361035	0.33073	-0.507265	4.08077	3.66115	4.24759	-0.208455	4.80518	4.51913
YCL018W	32 - YCL018W ... LEU2 leucine biosynthesis 3-isopropylmalate dehydrogenase actcytosol | YCL021W-A	32	17	1.88729	2.12432	2.04062	1.97102	2.39533	1.9664	2.38867	2.54765	2.32893	1.97372	2.61979	1.96582	3.60622	3.67475	3.86728	3.40494	3.72175	3.92232
YDR380W	32 - YDR380W iESR cluster ARO10 leucine catabolism* pyruvate decarboxylase activity* cytoplasm | YDR381C-A	32	17	2.99208	2.93337	3.10525	3.03687	2.957	3.46429	2.04251	2.27553	1.48674	1.79425	2.09478	1.82251	4.08803	4.20592	4.07447	3.27156	4.13039	3.93288
YHR137W	32 - YHR137W iESR cluster ARO9 aromatic amino acid family met aromatic-amino-acid transaminase accytoplasm* | YHR138C	32	17	2.18589	2.06674	2.22968	1.86107	1.9992	2.07291	2.05056	1.76368	1.61843	1.53266	2.00313	1.78015	3.12999	3.0258	3.24498	2.52515	3.16305	3.28124
YHR001W-A	6 - YHR001W-A ... QCR10 aerobic respiration* ubiquinol-cytochrome-c reductase acmitochondrion* | YHR002W	6	18	1.39474	1.06111	1.11265	1.18821	1.12471	1.16091	1.63942	1.60098	1.63184	1.58397	1.71896	1.53239	0.062565	0.047675	0.164765	0.164045	-0.01835	-0.19428
YLR311C	6 - YLR311C ... | YLR312C	6	18	0.95073	1.14196	1.3812	1.4294	0.87144	0.90584	1.25353	0.992705	1.27293	0.994235	1.7509	2.11925	0.045225	0.268775	0.487075	0.710085	0.47747	0.06913
YBR299W	6 - YBR299W ... MAL32 maltose catabolism alpha-glucosidase activity cellular component unknown | YBR300C	6	18	0.4536	0.92569	0.5145	1.04691	0.79325	1.07773	2.02051	2.18349	1.4682	1.93863	1.72337	2.02759	0.133045	0.610685	0.227445	0.629875	0.71937	0.1967
YGR292W	6 - YGR292W ... MAL12 maltose catabolism alpha-glucosidase activity cellular component unknown | YGR293C	6	18	0.62939	1.06868	0.85841	1.08487	0.76555	0.98112	2.17236	2.24797	1.31662	2.2016	1.52582	2.25521	0.067925	0.307575	0.270845	0.567965	0.19716	0.30201
YMR323W	6 - YMR323W ... ERR3 biological process unknown phosphopyruvate hydratase activity cytoplasm | YMR324C	6	18	0.84606	1.52115	1.2065	1.5844	1.11687	1.47473	2.26848	2.34199	1.80428	2.6319	2.16429	2.63998	0.405695	0.178995	0.232975	0.836485	0.11157	0.50886
YOR393W	6 - YOR393W ... ERR1 biological process unknown phosphopyruvate hydratase activity cellular component unknown | YOR394C-A	6	18	1.04917	1.70239	1.24603	1.5307	1.19899	1.40374	2.27954	2.64531	1.97437	2.55836	2.21372	2.64995	0.131425	0.136165	0.238615	0.664185	0.41191	0.25727
YPL281C	6 - YPL281C ... ERR2 biological process unknown phosphopyruvate hydratase activity cellular component unknown | YPL282C	6	18	1.10578	1.64744	1.44271	1.70885	1.36167	1.33449	2.14445	2.68685	1.90638	2.56563	2.10493	2.53532	0.342725	0.364125	0.197125	0.709875	0.26845	0.5646
YPR194C	6 - YPR194C ... OPT2 oligopeptide transport oligopeptide transporter activity integral to plasma membrane | YPR195C	6	18	1.40892	1.73296	1.39939	1.749	1.28818	1.39785	2.55093	2.17176	2.45795	2.35186	2.54644	2.2508	-0.223575	-0.175715	-0.008665	0.417075	0.10427	-0.05922
YBR174C	6 - YBR174C ... | YBR175W	6	18	2.35558	1.26295	0.98914	0.82358	0.79971	0.97491	1.34101	1.95351	2.46827	1.17413	1.78302	2.21577	0.335655	0.093945	0.299595	0.041685	0.87905	-0.5754
YCL048W-A	6 - YCL048W-A YCL048W-A YDL007C-A	6	18	1.05393	0.78302	1.54238	2.09207	2.36545	1.75367	2.43442	2.13365	1.99833	3.12149	1.45198	2.319	0.167015	0.354365	0.299045	1.23147	0.41501	0.01423
YKL162C-A	6 - YKL162C-A ... | YKL163W	6	18	0.93688	1.33514	1.22201	1.19332	2.01058	1.39945	1.44809	1.4966	1.26272	2.05607	1.29177	1.98002	0.016405	-0.554745	0.842755	-0.114895	0.97004	0.36389
YGR043C	6 - YGR043C ˜ iESR cluster NQM1 biological process unknown transaldolase activity | Transaldolase of unknown function; transcription is repressed by Mot1p and induced by alpha-factor and during diauxic shiftYGR044C	6	18	1.26107	1.34857	1.12851	1.42227	1.417	1.84205	2.13744	2.34463	1.29566	2.61068	1.36505	2.32885	0.419685	0.730255	0.524985	1.64549	0.78125	0.93586
YFL015C	6 - YFL015C ... | YFL016C	6	18	1.82919	1.11699	1.90269	0.9748	1.09655	0.67792	1.73784	1.99909	1.56726	2.2119	1.96912	1.04798	0.590215	-0.321485	0.822405	1.13872	0.69611	0.62245
YDL214C	6 - YDL214C ... PRR2 MAPKKK cascade receptor signaling protein serine/tnucleus | YDL215C	6	18	1.57724	2.23825	1.7551	1.84292	1.64108	2.14172	1.35866	1.53279	1.51225	1.69281	1.15366	1.58617	-0.166795	0.020415	-0.047985	0.274275	-0.20779	0.39642
YER158C	6 - YER158C iESR cluster YER158C biological process unknown molecular function unknown cellular component unknown | YER159C	6	18	1.95098	1.72802	1.94144	1.85948	1.84567	1.74428	1.7266	1.47288	1.99988	1.54946	1.84468	1.62214	0.336655	0.053275	0.523435	0.457405	0.60308	0.63653
YGR023W	6 - YGR023W iESR cluster MTL1 cell wall organization and bio molecular function unknown integral to plasma membrane | YGR024C	6	18	1.89164	1.82732	2.07029	1.63522	1.64445	1.08146	1.79799	1.15485	2.0575	1.43867	1.91099	1.62898	0.414555	0.083295	0.488365	0.569105	0.56619	0.56543
YPL119C-A	6 - YPL119C-A ... YPL119C-A biological process unknown molecular function unknown cellular component unknown | YPL120W	6	18	1.56293	1.39006	1.31208	1.6752	1.55338	2.03185	2.33105	1.35991	1.9773	2.43495	1.53083	1.92888	0.078055	0.887435	0.273075	1.6119	-0.02559	0.69699
YJL103C	6 - YJL103C ˜ iESR cluster GSM1 oxidative phosphorylation molecular function unknown | Putative zinc cluster protein of unknown function; proposed to be involved in the regulation of energy metabolism, based on patterns of expression and sequence analysisYJL104W	6	18	1.20813	0.81528	0.93443	0.99558	1.16901	1.43938	1.66863	1.49113	1.19589	1.71402	1.48675	1.72019	0.314555	0.241895	0.406305	0.627615	0.22176	0.38395
YJL165C	6 - YJL165C ... HAL5 cation homeostasis protein kinase activity cellular component unknown | YJL166W	6	18	0.93866	1.25249	1.39935	1.08566	1.01077	0.99433	1.39332	1.29395	1.94111	1.45555	1.44472	1.72256	0.408015	0.229335	0.550135	0.592695	0.2567	0.41625
YOR230W	6 - YOR230W ... WTM1 regulation of meiosis transcription corepressor activity nucleus | YOR231W	6	18	1.14012	1.16468	1.2256	1.13959	1.25261	0.96662	1.54828	1.77327	1.34709	1.52382	1.50081	1.62457	0.788715	0.344145	0.456485	0.314535	0.45162	0.79572
YER121W	6 - YER121W ... | YER122C	6	18	0.41476	1.42622	0.7872	0.94825	1.12143	1.06788	1.22196	1.77123	1.21642	1.76533	1.5267	1.80435	0.550245	0.266675	0.638045	1.10248	0.58642	0.75942
YMR095C	6 - YMR095C ... SNO1 pyridoxine metabolism* molecular function unknown cytoplasm | YMR096W	6	18	0.28511	1.60484	0.8545	1.0268	1.15471	0.99041	1.68596	1.62628	1.16624	1.86183	1.52399	1.8799	0.750145	0.876005	0.616595	0.503945	0.59548	0.16087
YGL010W	6 - YGL010W iESR cluster YGL010W biological process unknown molecular function unknown endoplasmic reticulum | YGL011C	6	18	1.25298	1.18629	0.93489	1.21991	1.80593	0.79308	1.78235	1.76392	1.46266	1.70378	1.78593	2.05607	0.768015	0.214875	1.12826	0.919385	1.05163	1.3648
YLR350W	6 - YLR350W ... ORM2 response to unfolded protein molecular function unknown endoplasmic reticulum | YLR351C	6	18	1.08197	0.97754	1.37212	0.88395	1.06094	0.54206	2.21004	1.8357	1.88328	2.08874	1.8936	2.1786	0.797945	0.415165	1.06534	1.02231	0.72452	1.04421
YBR298C	6 - YBR298C ... MAL31 alpha-glucoside transport alpha-glucoside:hydrogen symporter membrane fraction | YBR298C-A	6	18	1.07202	0.86573	0.76749	0.84793	1.01301	1.18193	2.01411	1.90027	1.70425	1.45019	1.87234	1.58215	0.131985	0.287625	0.910885	1.15936	0.89718	0.98262
YGR236C	6 - YGR236C ... SPG1 biological process unknown molecular function unknown mitochondrion | YGR237C	6	18	0.94833	1.29459	1.00236	1.31486	1.4556	1.59186	2.15415	2.04008	1.69103	2.59999	1.58396	1.54465	0.447035	0.852245	0.569275	0.886245	0.38576	1.2115
YDR178W	6 - YDR178W ... SDH4 tricarboxylic acid cycle* succinate dehydrogenase (ubiquinonerespiratory chain complex II (sensu | YDR179C	6	18	1.37429	1.42552	1.74671	1.24883	1.47237	0.92091	1.82993	1.61869	1.93359	1.56262	2.10211	1.6362	0.285705	0.313295	0.370175	1.21653	0.57638	0.44961
YLR176C	6 - YLR176C ... RFX1 negative regulation of transcr specific transcriptional repressor cytoplasm* | YLR177W	6	18	1.46305	1.58755	1.6416	1.2783	1.3458	1.28534	1.95385	1.90548	1.89231	1.81117	1.59586	1.88759	0.539865	0.580695	0.752565	0.883025	0.47344	0.88548
YPR149W	6 - YPR149W iESR cluster NCE102 protein secretion molecular function unknown cytoplasm* | YPR150W	6	18	1.37483	1.41932	1.46516	1.45267	1.5622	1.23137	1.81165	2.02913	1.99229	2.00156	2.02365	1.95233	0.046165	0.252455	0.663395	0.470325	0.90554	0.73752
YOR019W	52 - YOR019W ... YOR019W biological process unknown molecular function unknown cellular component unknown | YOR020C	52	18	2.46297	2.78896	2.93397	2.90953	2.68642	2.16153	2.53448	2.67602	2.58394	2.52788	2.60969	2.68746	0.960555	0.485175	0.941185	0.425895	0.52125	0.9079
YFL002W-B	52 - YFL002W-B YFL002W-B ò TRANSPOSABLE TY ELEMENTYFL015W-A	52	18	2.14633	1.98523	2.3314	1.78809	1.92	1.89083	3.24553	3.20339	3.45701	3.18336	3.24134	2.66688	1.05313	1.09183	0.913875	0.977605	0.64962	0.93491
YCL019W	52 - YCL019W YCL019W ò TRANSPOSABLE TY ELEMENTYCL020W	52	18	2.56822	2.87054	2.44795	2.52243	2.66253	2.6812	2.93579	3.41669	3.60541	2.98779	2.90508	3.2111	1.04632	0.834165	0.831365	0.747915	0.69871	0.99371
YDR210W-B	52 - YDR210W-B YDR210W-B ò TRANSPOSABLE TY ELEMENTYDR261C-C	52	18	2.36821	2.47235	2.4755	2.31734	2.34448	2.30447	3.43225	3.42281	3.53572	3.53991	3.26495	3.15714	1.007	0.819185	1.03374	1.18006	0.50438	0.93717
YFL002W-A	52 - YFL002W-A YFL002W-A ò TRANSPOSABLE TY ELEMENTYFL002W-B	52	18	2.656	2.48183	2.6219	2.47944	2.48486	2.57704	3.3955	3.36018	3.80122	3.58039	3.18027	3.36146	1.0557	0.776475	0.862805	0.833985	0.50778	0.92546
YDR261W-B	52 - YDR261W-B YDR261W-B ò TRANSPOSABLE TY ELEMENTYDR316W-A	52	18	2.42172	2.59145	2.42072	2.1887	2.19593	2.29028	3.5017	3.47416	3.7409	3.52156	3.14569	3.33075	0.867705	0.862205	0.798835	0.847345	0.38457	0.9345
YOR192C-B	52 - YOR192C-B YOR192C-B ò TRANSPOSABLE TY ELEMENTYOR231C-A	52	18	2.49162	2.61215	2.42197	2.31775	2.40979	2.55062	3.54383	3.50448	3.73283	3.48589	3.27252	3.32411	0.776695	0.884005	0.785965	0.784925	0.34308	0.93811
YDL024C	52 - YDL024C ... DIA3 pseudohyphal growth* acid phosphatase activity cell wall (sensu Fungi) | YDL025C	52	18	2.91399	3.12075	2.66506	2.60807	2.83411	2.95084	3.30923	3.50732	3.44908	3.41636	3.30281	3.57984	0.923675	1.13755	1.3577	1.52496	1.1414	1.20781
YGR243W	52 - YGR243W ... FMP43 biological process unknown molecular function unknown mitochondrion | YGR244C	52	18	3.17854	3.2254	2.93291	2.97823	3.06748	3.14543	3.61844	3.88585	3.69658	3.78812	3.54302	3.61449	1.17752	1.10136	1.50351	1.48199	1.74562	1.47037
YLR312C	52 - YLR312C iESR cluster YLR312C biological process unknown molecular function unknown cellular component unknown | YLR312W-A	52	18	2.57609	2.36389	2.61106	2.76508	2.44865	2.61304	3.06109	3.12447	2.81445	3.10589	2.54877	3.28978	1.30272	1.28814	1.41891	1.42311	1.34812	1.27438
YOR161C	52 - YOR161C iESR cluster PNS1 biological process unknown molecular function unknown* integral to plasma membrane | YOR161C-C	52	18	2.41135	2.63852	2.22541	2.63898	2.30136	2.26599	2.74929	3.07095	3.46565	2.62425	2.65585	2.72497	1.17972	0.960375	1.38441	1.38241	1.44811	1.80238
YDL022C-A	52 - YDL022C-A ˜ Dubious Dubious open reading frame unlikely to encode a protein; partially overlaps the verified gene DIA3; identified by fungal homology and RT-PCRYDL025W-A	52	18	2.81431	3.33506	2.52215	3.63248	3.23969	2.55202	2.95113	3.29515	3.21616	3.45998	3.11564	3.20425	1.29678	0.272035	0.586145	-0.063715	1.00354	0.34801
YHR096C	52 - YHR096C iESR cluster HXT5 hexose transport glucose transporter activity* plasma membrane | YHR097C	52	18	1.88023	2.96111	2.11602	2.71155	2.02846	2.10856	3.16689	2.94558	2.63928	3.36625	2.74309	3.89793	0.232765	0.727325	0.163565	1.03225	0.02432	0.72967
YGR144W	52 - YGR144W ... THI4 mitochondrial genome maintenan molecular function unknown mitochondrion* | YGR145W	52	18	2.50038	2.94953	2.17471	2.40774	2.00191	2.20345	2.44596	2.23157	3.12872	2.45316	2.22952	3.15528	0.769495	0.539685	0.655995	0.571125	0.83715	0.77804
YGR110W	52 - YGR110W ˜ CLD1 biological process unknown molecular function unknown | Mitochondrial cardiolipin-specific phospholipase; functions upstream of Taz1p to generate monolyso-cardiolipin; transcription increases upon genotoxic stress; involved in restricting Ty1 transposition; has homology to mammalian CGI-58YGR111W	52	18	2.57179	2.73677	2.1691	2.61346	2.06586	1.72238	2.85637	2.63525	2.749	2.69998	2.9571	2.6764	0.910005	0.853185	0.641435	0.582325	0.98289	0.71053
YLR410W-B	52 - YLR410W-B YLR410W-B ò TRANSPOSABLE TY ELEMENTYLR437C-A	52	18	2.86725	2.81499	2.57891	2.57914	2.74104	2.68981	3.23557	3.7854	3.77853	3.46256	3.13537	3.12457	1.06327	0.603965	0.966665	0.484175	0.52238	1.0253
YGR161W-B	52 - YGR161W-B YGR161W-B ò TRANSPOSABLE TY ELEMENTYHL009W-A	52	18	2.85364	2.90107	2.86429	3.01884	2.50828	2.90012	3.86676	3.54378	3.84732	4.07998	3.38785	3.40562	1.00867	0.844575	1.0738	0.992445	0.35366	0.93561
YDR261W-A	52 - YDR261W-A YDR261W-A ò TRANSPOSABLE TY ELEMENTYDR261W-B	52	18	4.11773	3.1912	4.00288	2.78602	3.53202	3.54812	3.72098	3.02664	3.6276	3.73021	3.31987	3.26971	1.29797	0.455015	1.05391	1.07889	0.53631	1.05548
YBR176W	18 - YBR176W ... ECM31 pantothenate biosynthesis 3-methyl-2-oxobutanoate hydroxymethmitochondrion | YBR177C	18	20	1.3069	1.17201	1.22332	0.99234	1.58814	1.12009	0.74583	0.568445	0.997815	0.639215	0.86693	0.750025	0.783375	0.697975	0.843395	0.904565	1.05869	1.14923
YCR024C	18 - YCR024C ... SLM5 protein biosynthesis asparagine-tRNA ligase activity mitochondrion | YCR024C-A	18	20	1.179	0.79547	1.00777	1.02225	1.14059	1.03258	0.79383	0.714765	0.484245	0.880605	0.69132	0.751975	0.750075	0.726585	0.840265	0.794215	0.74166	0.9615
YPR008W	18 - YPR008W ... HAA1 transcription initiation from specific RNA polymerase II transcrinucleus | YPR009W	18	20	1.29503	1.22489	1.34732	1.01517	1.28977	1.23457	0.80905	0.659445	1.078	0.927045	0.91429	1.00072	1.19634	1.1968	1.16548	0.942255	1.17212	1.23331
YDL230W	18 - YDL230W ... PTP1 protein amino acid dephosphory protein tyrosine phosphatase activicytoplasm* | YDL231C	18	20	1.14986	1.20303	1.24402	1.2128	1.22708	1.1005	0.67406	0.693995	0.632645	0.556675	0.5924	0.724055	0.969205	1.0891	1.16478	1.11262	1.22172	1.57207
YBR233W	18 - YBR233W ... PBP2 biological process unknown molecular function unknown cytoplasm | YBR233W-A	18	20	1.33424	1.34915	1.14538	1.0145	1.15207	1.24108	0.54786	0.378235	0.349285	0.659975	0.62876	0.582695	0.890865	0.642585	0.859115	0.598505	0.74194	1.16503
YLR278C	18 - YLR278C ... YLR278C biological process unknown molecular function unknown nucleus | YLR279W	18	20	1.00045	0.93242	1.1827	0.82229	0.9535	1.14538	0.5511	0.266485	0.514745	0.470505	0.37235	0.470305	0.950165	0.849175	0.722555	0.769005	0.86509	0.93748
YOR027W	18 - YOR027W ... STI1 protein folding unfolded protein binding* cytoplasm | YOR028C	18	20	1.21113	1.23117	1.00889	0.88364	1.00332	1.22713	0.52241	0.527945	0.845385	0.629765	0.73627	0.728565	1.40505	1.122	1.20531	0.640585	1.08362	1.19728
YGL219C	18 - YGL219C ... MDM34 mitochondrion organization and molecular function unknown cytoplasm* | YGL220W	18	20	1.20579	0.89951	1.03139	0.72277	1.11234	1.07231	0.98475	0.790655	0.745655	1.04496	0.93974	0.926595	0.892645	0.705735	0.755325	0.543055	0.65634	0.61649
YHR159W	18 - YHR159W ... YHR159W biological process unknown molecular function unknown cytoplasm | YHR160C	18	20	1.25037	1.0425	1.17158	1.00247	1.0611	1.07883	1.02721	1.09071	0.926995	1.07516	1.00007	1.04139	0.854445	0.974895	0.883635	0.654545	0.91976	0.7366
YLR250W	18 - YLR250W iESR cluster SSP120 protein secretion molecular function unknown cytoplasm | YLR251W	18	20	1.27502	1.22131	1.31644	1.14147	1.16699	1.27016	0.98728	1.02947	1.05785	1.0346	1.06677	1.04302	1.07927	1.0812	0.995895	0.772065	0.99798	1.03966
YPL260W	18 - YPL260W ... YPL260W biological process unknown molecular function unknown cytoplasm* | YPL261C	18	20	1.06698	1.09229	1.07051	0.98437	1.04639	1.35518	0.93255	1.04034	0.988005	1.16895	1.08193	1.07363	0.873805	0.761255	0.987105	0.683415	0.83386	0.81083
YMR013C	18 - YMR013C ... SEC59 protein amino acid glycosylati dolichol kinase activity endoplasmic reticulum membrane | YMR013W-A	18	20	1.42425	1.29033	1.54043	1.41182	1.28128	1.35524	0.92191	1.07022	1.18365	0.860845	0.92128	0.924495	0.685245	1.04144	0.794175	0.835625	0.71479	0.91393
YML029W	18 - YML029W ... USA1 nuclear mRNA splicing, via spl molecular function unknown cellular component unknown | YML030W	18	20	1.21778	1.08415	1.19494	1.32448	1.25838	1.19366	0.90911	1.38471	0.931815	0.991865	0.67162	0.931025	0.655275	0.863845	0.976465	0.773135	0.82447	1.03615
YHR116W	18 - YHR116W ... COX23 aerobic respiration molecular function unknown cytoplasm* | YHR117W	18	20	1.26156	1.18865	1.36218	0.94682	1.28882	1.28197	0.9285	0.721245	1.02663	0.631075	1.05408	0.911655	0.763255	0.608885	0.633645	0.741655	0.68199	0.64972
YNL265C	18 - YNL265C ... IST1 protein biosynthesis translation initiation factor activendosome | YNL266W	18	20	1.02561	1.00641	1.23849	0.94871	0.99919	1.1188	0.86766	0.697215	0.791035	0.575555	0.94678	0.782235	0.790675	0.803025	0.881165	0.580945	0.76855	0.74432
YNR076W	18 - YNR076W ... PAU6 biological process unknown molecular function unknown cellular component unknown | YNR077C	18	20	1.45775	1.35268	1.5227	1.5519	1.65932	1.47434	1.0938	0.747005	0.773185	1.03514	1.21101	0.965975	1.06153	0.801065	0.894965	0.730625	0.96361	0.90647
YOR020C	18 - YOR020C ... HSP10 protein folding unfolded protein binding mitochondrial matrix | YOR020W-A	18	20	1.39243	1.26822	1.33332	1.24073	1.43017	1.06988	0.83883	0.440545	0.919675	0.777245	1.09015	0.766985	0.925225	0.784695	0.849465	0.625805	0.76623	0.49121
YCL050C	18 - YCL050C ... APA1 nucleotide metabolism bis(5'-nucleosyl)-tetraphosphatase cytoplasm* | YCL051W	18	20	1.34058	1.22476	1.17172	1.19765	1.2767	1.24771	0.53536	1.00635	0.697665	0.642775	0.56933	0.842315	0.397275	0.665655	0.727225	0.467855	0.57997	0.76411
YHR082C	18 - YHR082C ... KSP1 protein amino acid phosphoryla protein serine/threonine kinase actnucleus | YHR083W	18	20	1.15736	1.28447	1.18195	1.29002	0.90571	1.28685	0.44352	1.04314	0.689835	0.687985	0.29062	0.818275	0.412065	0.525205	0.543795	0.525995	0.58534	0.59471
YLR463C	18 - YLR463C ... | YLR464W	18	20	1.12433	0.73209	1.63608	1.01208	1.36526	0.60188	0.50815	0.566915	0.843415	0.091365	0.63219	0.414905	0.733035	0.646525	0.858455	0.939495	1.28375	1.26528
YER046W	18 - YER046W ... SPO73 sporulation (sensu Fungi)* molecular function unknown cytosol | YER047C	18	20	1.15355	1.24461	1.3427	1.18624	1.03498	1.58425	0.88871	0.403045	0.632365	1.21069	0.86025	0.827025	0.431495	0.829765	0.538855	1.23992	-0.00175	0.97854
YLR466C-B	18 - YLR466C-B ... YLR466C-B biological process unknown molecular function unknown cellular component unknown | YLR466W	18	20	1.46527	1.2602	1.25061	0.98915	1.28115	0.95627	0.96067	0.168755	0.927565	1.11682	0.80804	0.612015	0.734305	0.510595	0.743235	0.970255	0.20887	1.05717
YAR023C	18 - YAR023C ... YAR023C biological process unknown molecular function unknown cellular component unknown | YAR027W	18	20	1.16789	1.37138	1.42925	1.22036	1.40695	1.32694	0.46667	0.218615	0.540665	0.265915	0.44617	0.403515	1.09844	0.925165	1.11692	0.761775	1.32551	1.2844
YDR423C	18 - YDR423C ... CAD1 positive regulation of transcr RNA polymerase II transcription faccytoplasm* | YDR424C	18	20	1.32719	1.20634	1.29949	1.06926	1.20447	1.10703	0.45254	0.742505	0.801625	0.890305	0.80717	0.901845	0.887535	1.10315	0.754445	0.549625	0.70865	1.29488
YNR068C	18 - YNR068C ... YNR068C biological process unknown molecular function unknown cellular component unknown | YNR069C	18	20	1.3845	1.21833	1.14841	1.37826	1.06874	1.68006	0.91292	0.663535	0.714975	1.07672	0.84581	0.685255	0.936095	1.19599	1.06333	1.25141	0.80697	1.25065
YOR059C	18 - YOR059C ... YOR059C biological process unknown molecular function unknown lipid particle | YOR060C	18	20	1.11114	0.93893	1.0642	1.07331	0.88829	1.29031	0.85032	0.651915	0.629915	0.660785	0.77064	0.504385	1.06208	1.3077	1.15397	0.930735	0.87776	1.2476
YLL029W	18 - YLL029W ˜ FRA1 biological process unknown molecular function unknown | Protein involved in negative regulation of transcription of iron regulon; forms an iron independent complex with Fra2p, Grx3p, and Grx4p; cytosolic; mutant fails to repress transcription of iron regulon and is defective in spore formationYLL030C	18	20	1.41473	1.17615	1.29314	1.25515	1.25036	1.50318	0.64745	0.622595	0.419845	0.457565	0.59379	0.545985	0.987365	0.902705	1.07881	0.374215	1.04806	1.09742
YMR068W	18 - YMR068W ... AVO2 regulation of cell growth molecular function unknown cytoplasm | YMR069W	18	20	1.30252	1.415	1.19911	1.15372	1.48234	1.65299	0.95944	0.880505	0.734565	1.00978	0.73353	0.803545	0.938705	0.856255	0.959145	0.560585	0.82977	1.26346
YNR069C	18 - YNR069C ... BSC5 biological process unknown molecular function unknown cellular component unknown | YNR070W	18	20	1.5462	1.34253	1.65382	1.44233	1.21222	1.59019	0.55566	0.715315	0.407445	0.966945	0.41722	0.912295	0.588095	1.17399	0.904845	1.47195	1.18228	1.30305
YML068W	18 - YML068W ... ITT1 regulation of translational te molecular function unknown cellular component unknown | YML069W	18	20	1.06078	0.98593	1.1272	1.103	1.26202	1.50545	0.59009	1.11227	0.409305	0.992535	0.35139	0.670285	0.699575	0.960235	0.610075	0.691915	0.86114	1.05447
YLR465C	18 - YLR465C ˜ BSC3 | Dubious open reading frame, unlikely to encode a protein; not conserved in closely related Saccharomyces species; 100% of YLR465C overlaps the uncharacterized ORF YLR464W and 86% of YLR465C overlaps the verified gene YRF1-4YLR466C-B	18	20	1.35407	1.06491	1.54477	1.12443	1.58696	0.85392	0.60646	0.873865	0.936705	0.756325	0.52924	0.259235	0.814755	0.821235	0.899045	0.977775	0.8402	1.14882
YIL176C	18 - YIL176C ... YIL176C biological process unknown molecular function unknown cellular component unknown | YIL177C	18	20	1.31555	1.5118	1.55817	1.28245	1.10424	1.32224	1.06827	0.372255	1.00128	1.43304	0.73914	0.884495	0.837325	0.772475	0.824655	0.943545	0.6803	0.76559
YOL161C	18 - YOL161C ... YOL161C biological process unknown molecular function unknown cellular component unknown | YOL162W	18	20	1.38733	1.34528	1.57926	1.54999	1.51525	1.2346	0.82907	0.557685	1.08451	1.09596	0.84504	0.862055	1.09712	0.992955	0.983075	0.904735	0.78039	0.36525
YMR013C-A	18 - YMR013C-A ˜ Dubious Dubious open reading frame unlikely to encode a protein, based on available experimental and comparative sequence data; completely overlaps the verified ORF SEC59/YML013CYMR031W-A	18	20	0.90711	1.10057	1.25925	1.34907	1.26766	1.10179	0.83361	1.03225	1.25127	0.659015	0.70134	0.711295	0.395515	0.883455	0.592345	0.831965	0.97714	0.8033
YLR102C	18 - YLR102C ... APC9 mitotic sister chromatid segre protein binding* anaphase-promoting complex | YLR103C	18	20	1.26279	0.96119	1.01936	1.46907	1.08083	1.36965	0.83508	0.922495	1.02089	1.3335	0.91451	0.583585	0.934485	0.972185	0.847505	0.359475	0.50115	0.39505
YBR076C-A	18 - YBR076C-A ˜ Dubious Dubious open reading frame unlikely to encode a protein; partially overlaps verified gene ECM8; identified by fungal homology and RT-PCRYBR109W-A	18	20	1.29383	1.12527	1.1732	1.30953	1.11554	0.80107	0.44185	0.475425	0.727985	0.841505	0.68574	0.560995	0.547505	0.155995	0.612485	0.535895	0.6221	0.57825
YBL033C	18 - YBL033C ... RIB1 riboflavin biosynthesis cyclohydrolase activity cytoplasm* | YBL034C	18	20	1.69981	1.54838	1.73372	1.34675	1.3303	1.26188	0.5955	0.754095	1.04509	0.602805	0.67204	0.715795	0.714955	0.907575	0.959685	0.621775	1.05442	0.88411
YNL281W	18 - YNL281W ... HCH1 response to stress* chaperone activator activity cytoplasm* | YNL282W	18	20	1.35251	1.5181	1.23302	1.78514	1.24148	1.58693	0.58137	0.651385	0.850665	0.471325	0.79719	0.669385	0.969445	0.697615	0.801395	0.423415	0.63187	0.68218
YJR116W	18 - YJR116W ... YJR116W biological process unknown molecular function unknown cellular component unknown | YJR117W	18	20	1.28128	1.35757	1.14571	1.42576	1.38543	0.89015	0.63257	0.623405	1.24752	0.504145	0.84127	0.665025	0.723305	0.474725	0.524025	0.674845	0.76881	0.91675
YBR119W	18 - YBR119W ... MUD1 nuclear mRNA splicing, via spl RNA binding snRNP U1 | YBR120C	18	20	1.29474	1.06489	0.79764	0.94701	1.00208	1.35939	0.63657	0.764965	0.947585	0.802655	0.80997	0.532615	0.783305	0.441015	0.622295	0.511515	0.34897	0.48407
YPR047W	18 - YPR047W ... MSF1 protein biosynthesis phenylalanine-tRNA ligase activity mitochondrion | YPR048W	18	20	1.47536	1.18456	1.12174	1.1074	1.33597	1.62097	0.53926	0.714655	0.796495	0.691515	0.74989	0.642255	0.932345	0.511685	0.460785	0.355335	0.44359	0.27093
YJL073W	18 - YJL073W ... JEM1 protein folding* unfolded protein binding* endoplasmic reticulum* | YJL074C	18	20	1.21988	1.49968	1.36367	1.41014	0.85462	1.12467	0.79215	0.694705	1.01276	0.901255	0.49836	0.946125	0.617865	0.928365	0.704535	0.596945	0.44591	0.40921
YLR012C	18 - YLR012C ... YLR012C biological process unknown molecular function unknown cellular component unknown | YLR013W	18	20	1.05376	1.15204	1.06321	1.24364	1.27457	1.12054	0.06226	1.17895	0.691005	0.680805	0.79488	0.279485	0.820305	0.802215	0.680535	0.730665	0.85244	0.39509
YOL156W	18 - YOL156W ... HXT11 hexose transport glucose transporter activity* plasma membrane | YOL157C	18	20	0.80383	1.25627	1.03279	1.42118	0.90745	1.14609	0.283	0.191095	0.335715	0.911185	0.7816	0.827695	0.617185	0.797505	0.595635	0.983975	0.77727	0.13052
YFR026C	18 - YFR026C ˜ ULI1 biological process unknown molecular function unknown | Putative protein of unknown function involved in and induced by the endoplasmic reticulum unfolded protein responseYFR027W	18	20	1.43124	1.83486	1.74992	1.63109	1.23501	1.16365	0.85767	0.965925	0.364675	0.560125	0.47207	0.479675	0.901085	0.704835	0.663095	0.906345	0.84606	0.35885
YMR271C	15 - YMR271C iESR cluster URA10 pyrimidine base biosynthesis orotate phosphoribosyltransferase acytoplasm | YMR272C	15	21	2.39606	2.00283	1.6349	1.70012	2.0308	2.65421	1.30359	1.61715	1.23161	1.83705	1.01828	1.3514	1.39524	2.05606	1.91504	2.05403	1.54536	1.95379
YMR181C	15 - YMR181C iESR cluster YMR181C biological process unknown molecular function unknown cellular component unknown | YMR182C	15	21	2.22341	2.22273	2.11145	2.36847	1.96468	2.01871	1.15661	1.22338	1.32449	1.36966	1.21117	1.10939	1.63881	1.90708	2.11665	2.53394	2.16663	2.25675
YIL100W	15 - YIL100W | YIL101C	15	21	2.56733	2.40438	2.29588	2.2317	2.09293	2.14802	0.96232	0.879905	0.572805	1.48131	0.79136	1.27506	1.00605	1.58584	1.22449	1.39794	0.85858	1.11754
YIR039C	15 - YIR039C iESR cluster YPS6 biological process unknown aspartic-type endopeptidase activitcell wall (sensu Fungi) | YIR040C	15	21	2.72702	3.17775	2.62998	2.75452	2.63038	3.16752	1.62143	1.75503	1.14448	2.04981	1.07179	1.65592	1.15829	1.87875	1.68529	2.10534	1.63331	2.12163
YNR073C	15 - YNR073C ... YNR073C biological process unknown mannitol dehydrogenase activity cellular component unknown | YNR074C	15	21	1.56752	2.16583	1.67378	1.65113	1.62298	1.7732	0.86074	1.13633	0.710355	1.34806	0.34025	1.2671	0.814695	1.68071	1.0936	2.10232	1.16124	1.83512
YHR046C	15 - YHR046C ... INM1 inositol phosphate dephosphory inositol-1(or 4)-monophosphatase accytoplasm* | YHR047C	15	21	2.54352	2.72369	2.52204	2.39221	2.28063	2.47258	0.74873	1.18996	1.44104	0.457865	0.90111	0.621365	1.04439	1.21232	0.865325	0.773035	0.76827	1.04794
YMR008C	15 - YMR008C ... PLB1 glycerophospholipid metabolism lysophospholipase activity cell wall (sensu Fungi) | YMR009W	15	21	2.23093	2.21897	2.3772	2.52096	2.17347	2.16275	1.27137	1.34874	1.56492	0.772365	1.34564	1.17936	0.660435	0.778495	0.748625	0.646455	0.86826	0.74586
YGR250C	15 - YGR250C iESR cluster YGR250C biological process unknown RNA binding cytoplasm | YGR251W	15	21	2.34032	2.37236	2.85739	2.70091	1.63175	2.35083	1.37884	1.28201	1.49209	1.39963	0.96887	1.24558	0.319345	0.667935	0.639425	0.989315	0.32872	0.47152
YOL104C	15 - YOL104C ... NDJ1 synapsis* telomeric DNA binding "nuclear chromosome, telomeric regio" | YOL105C	15	21	2.18536	1.94836	2.2987	1.85045	2.38221	2.27662	1.42064	1.80469	1.09539	1.88135	1.6013	1.59823	0.274285	0.854705	0.374795	0.794415	0.44851	0.31567
YLR034C	15 - YLR034C ... SMF3 intracellular sequestering of iron ion transporter activity vacuolar membrane (sensu Fungi) | YLR035C	15	21	1.96051	2.17778	1.99187	2.25234	2.02542	1.93597	1.26185	1.25361	1.57942	0.958255	1.37164	1.1879	1.11203	1.23985	1.40033	-0.085055	1.45876	1.45978
YBR012C	15 - YBR012C ... | YBR013C	15	21	2.87296	1.72176	2.32325	1.58937	2.57995	3.23715	1.38033	1.36135	1.04832	2.09822	1.04014	1.42553	1.49131	1.44643	1.46364	1.36827	1.35945	1.54644
YIR044C	#N/A	15	21	2.55715	2.47169	2.64622	2.83617	2.68183	2.48275	1.16114	1.43583	1.85755	1.45104	0.90818	0.666745	0.383805	0.731105	0.869845	0.725445	0.81707	1.26666
YGR249W	15 - YGR249W ... MGA1 filamentous growth molecular function unknown cellular component unknown | YGR250C	15	21	2.03282	2.48883	1.98885	2.29671	1.54334	2.08106	1.42293	1.48012	1.2692	2.15931	0.88329	1.36143	0.482945	0.509885	0.472795	1.48974	0.40419	0.45434
YGR142W	15 - YGR142W ... BTN2 intracellular protein transpor molecular function unknown cytosol | YGR143W	15	21	2.59751	2.71357	3.11669	3.34531	1.70203	2.31624	0.36177	0.056985	1.36726	0.826695	0.1138	0.987835	-0.431815	0.437865	1.86762	2.2344	0.46534	1.429
YCR102W-A	15 - YCR102W-A ... | YCR104W	15	21	2.41248	3.14036	2.87928	3.29146	2.26322	2.4694	1.14415	1.47906	2.00319	1.03215	0.74389	1.70541	0.604135	-0.599335	0.498985	0.349525	-0.04053	-0.67422
YHR053C	15 - YHR053C ... CUP1-1 response to copper ion copper ion binding cytosol | YHR054C	15	21	2.23897	2.49798	3.53429	2.81461	2.38401	1.66608	0.85669	0.782775	1.5188	0.790295	0.92387	0.918955	-0.691435	0.047925	-0.076135	0.840745	0.18488	0.2728
YHR055C	15 - YHR055C ... CUP1-2 response to copper ion copper ion binding cytosol | YHR056C	15	21	2.24284	2.26499	2.71486	2.59498	2.08207	1.89831	0.59462	0.753785	1.65543	0.962545	0.8702	0.993695	-0.231035	0.038255	-0.246375	0.983525	-0.0399	0.14843
YJR078W	15 - YJR078W ... BNA2 NAD biosynthesis "tryptophan 2,3-dioxygenase activity"cytoplasm | YJR079W	15	21	1.65169	2.10166	1.69564	1.89064	1.73086	1.86758	0.82633	1.18179	0.935145	1.30571	0.85244	1.28127	1.2123	1.57771	1.00123	1.3644	1.04999	1.39145
YDR247W	15 - YDR247W ... VHS1 protein amino acid phosphoryla protein kinase activity* cytoplasm | YDR248C	15	21	2.13117	2.57339	2.44617	2.50765	1.94507	2.03173	2.14141	1.76031	2.5581	1.74039	1.79034	2.07938	0.478845	0.709215	0.849945	1.09312	0.88723	1.00791
YDR400W	15 - YDR400W ... URH1 pyrimidine salvage* uridine nucleosidase activity cytoplasm* | YDR401W	15	21	2.10931	2.27053	2.28032	2.1558	2.14284	1.83409	1.44299	1.87397	1.8561	1.20301	1.40849	1.38566	1.92426	1.79831	1.99686	1.56736	1.79423	1.85568
YLR136C	15 - YLR136C ... TIS11 mRNA catabolism* mRNA binding cytoplasm* | YLR137W	15	21	2.91582	2.29788	2.68533	2.85104	2.27148	3.62173	1.17248	-0.208295	0.244215	0.760155	2.23367	0.577565	2.83882	1.91551	2.90451	-0.908595	2.51186	2.57552
YER188W	15 - YER188W ... | YER189W	15	21	4.07078	4.18229	4.04222	4.02978	3.62172	4.21633	1.76571	1.9177	1.89346	1.90402	1.30221	1.89691	0.249855	0.596175	0.359905	0.271085	0.60917	0.64253
YER053C-A	15 - YER053C-A ... YER053C-A biological process unknown molecular function unknown endoplasmic reticulum | YER054C	15	21	3.00981	2.37664	2.94934	3.15473	3.63534	4.36742	1.29774	1.21151	1.8899	0.827095	1.74281	1.43704	-1.47124	-1.58664	-1.44237	-0.017565	-1.42317	-0.66187
YNR019W	14 - YNR019W ... ARE2 sterol metabolism sterol O-acyltransferase activity endoplasmic reticulum | YNR020C	14	21	1.15178	1.04873	1.10106	0.95773	0.88898	1.09786	0.46243	0.734345	0.918755	0.294315	0.49385	0.642405	0.174605	0.285975	0.132475	0.145195	0.47606	0.0404
YDR511W	14 - YDR511W ... ACN9 gluconeogenesis* molecular function unknown mitochondrial intermembrane space | YDR512C	14	21	0.97216	0.63521	1.16699	0.58078	0.98519	0.92736	0.81282	0.387245	0.637195	0.559315	1.18567	0.697925	0.388895	0.064325	0.308385	0.109445	0.31122	0.13212
YLR011W	14 - YLR011W ... LOT6 biological process unknown FMN reductase activity cytoplasm* | YLR012C	14	21	1.03067	0.83444	0.89546	0.94828	1.08022	1.64285	0.48557	0.567865	0.858795	0.952125	0.39216	0.436735	0.238555	0.473035	0.475795	0.117715	0.18181	0.30936
YCL008C	14 - YCL008C ... STP22 protein-vacuolar targeting* protein binding endosome* | YCL009C	14	21	0.97276	0.73074	1.02502	0.62999	0.96831	1.08578	0.59591	0.593065	0.115325	0.626625	0.36275	0.541465	0.538675	0.220455	0.583055	0.339155	0.50543	0.69924
YER175C	14 - YER175C ... TMT1 biological process unknown trans-aconitate 3-methyltransferasecytosol | YER175W-A	14	21	0.93446	0.68752	0.79914	0.65426	0.86437	1.12348	0.39166	0.385565	0.156085	0.486505	0.38743	0.187095	0.243195	0.604335	0.501355	0.336045	0.4208	0.42773
YFL033C	14 - YFL033C ... RIM15 protein amino acid phosphoryla protein kinase activity cytoplasm* | YFL034C-A	14	21	0.62944	0.51916	0.70629	0.56379	0.61281	0.58613	0.60403	0.689425	0.413605	0.785305	0.47182	0.682025	0.183515	0.261245	0.391735	0.459815	0.2517	0.60756
YOR299W	14 - YOR299W ... BUD7 bud site selection molecular function unknown clathrin-coated vesicle | YOR301W	14	21	0.8866	0.61224	0.85956	0.72274	0.85051	0.6856	0.53145	0.663145	0.501065	0.394845	0.33182	0.637805	0.090965	0.281145	0.186775	0.305975	0.32939	0.45876
YDR377W	14 - YDR377W ... ATP17 ATP synthesis coupled proton t hydrogen-transporting ATP synthase proton-transporting ATP synthase co | YDR378C	14	21	1.00707	0.82503	0.98878	0.8308	0.95813	0.66769	0.69047	0.421165	0.602805	0.492295	0.66657	0.628165	0.463125	0.351825	0.382385	0.212825	0.41027	0.29472
YDR027C	14 - YDR027C ... VPS54 Golgi to vacuole transport* molecular function unknown mitochondrion* | YDR028C	14	21	0.79852	0.70266	0.89261	0.69237	0.63542	0.80408	0.4279	0.722035	0.648555	0.532255	0.44857	0.509375	0.488775	0.535515	0.581955	0.260685	0.42768	0.35333
YLR371W	14 - YLR371W ... ROM2 cell wall organization and bio signal transducer activity* bud tip | YLR372W	14	21	0.41843	0.67124	0.77112	0.54178	0.62432	0.63781	0.66633	0.637355	0.683845	0.621475	0.60044	0.579085	0.331505	0.292935	0.318445	0.280495	0.21901	0.34735
YMR200W	14 - YMR200W ... ROT1 cell wall organization and bio molecular function unknown endoplasmic reticulum | YMR201C	14	21	0.81776	0.75908	1.12098	0.7754	0.58296	0.76695	0.68001	0.628595	0.507785	0.798555	0.71695	0.656875	0.588315	0.375855	0.562995	0.358205	0.39779	0.42748
YLR064W	14 - YLR064W ... YLR064W biological process unknown molecular function unknown endoplasmic reticulum | YLR065C	14	21	0.86144	1.01734	1.08726	1.25073	0.67661	0.59736	0.60126	0.653185	0.558895	0.376465	0.59412	0.600195	0.218025	0.234155	0.398825	0.323095	0.75046	0.31295
YDR409W	14 - YDR409W ... SIZ1 protein sumoylation SUMO ligase activity septin ring | YDR410C	14	21	0.77486	0.94506	0.8531	0.77273	0.76475	0.87995	0.40343	0.576625	0.872365	0.610335	0.48691	0.546375	0.250645	0.296495	0.274435	0.224645	0.2007	0.38252
YNL236W	14 - YNL236W ... SIN4 transcription from RNA polymer RNA polymerase II transcription medmediator complex | YNL237W	14	21	1.03447	0.92915	0.88185	0.73109	0.88332	1.03642	0.49985	0.290635	0.448915	0.527155	0.24315	0.585155	0.336625	0.372105	0.520995	0.502345	0.3774	0.327
YJR062C	14 - YJR062C ... NTA1 protein catabolism* protein N-terminal asparagine amidomitochondrion | YJR063W	14	21	0.80929	0.55738	0.67576	0.81509	0.78702	0.75214	0.39278	0.429815	0.221685	0.510555	0.34876	0.441535	0.208935	0.227425	0.270775	0.392935	0.26173	0.61523
YJR005W	14 - YJR005W ... APL1 vesicle-mediated transport molecular function unknown AP-2 adaptor complex | YJR006W	14	21	0.51088	0.60019	0.7198	0.71113	0.54866	0.83438	0.41185	0.837785	0.348965	0.517695	0.35548	0.518955	0.330035	0.469995	0.213465	0.227865	0.33799	0.15581
YDR313C	14 - YDR313C ... PIB1 protein ubiquitination ubiquitin-protein ligase activity vacuolar membrane (sensu Fungi)* | YDR314C	14	21	0.53595	0.60858	0.72108	0.64919	0.6009	0.35548	0.69448	0.393525	0.251505	0.772505	0.60897	0.688025	0.342315	0.086575	0.231355	0.457025	0.03517	0.43148
YDR063W	14 - YDR063W ˜ AIM7 biological process unknown molecular function unknown | Putative protein of unknown function; green fluorescent protein (GFP)-fusion protein localizes to the cytoplasm and nucleus; null mutant is viable and displays elevated frequency of mitochondrial genome lossYDR064W	14	21	0.7071	0.58365	0.61164	0.59893	0.68645	0.69699	0.50053	0.741475	0.639395	0.891315	0.53491	0.349205	0.279565	0.295815	0.232285	0.189135	-0.05251	0.36964
YGL192W	14 - YGL192W ... IME4 meiosis* mRNA methyltransferase activity cellular component unknown | YGL193C	14	21	0.71366	0.59635	0.71629	0.53625	0.41089	0.85785	0.59985	0.865455	0.526705	0.839295	0.57294	0.462215	0.260155	0.476065	0.371135	0.181825	0.31207	0.37331
YMR164C	14 - YMR164C ... MSS11 pseudohyphal growth* specific RNA polymerase II transcrinucleus | YMR165C	14	21	0.93839	1.14507	0.94671	0.93735	0.82644	1.23087	0.42276	0.167815	0.544385	0.624215	0.25781	0.522525	0.248545	0.268465	0.150585	0.025245	-0.16338	0.13203
YKR093W	14 - YKR093W ... PTR2 peptide transport peptide transporter activity plasma membrane | YKR094C	14	21	0.86742	0.92573	1.07707	0.85594	0.70244	0.65666	0.40066	0.587295	0.614315	0.224225	0.29573	0.304555	0.364815	0.196015	0.129535	0.486375	0.47795	0.1585
YJR034W	14 - YJR034W ... PET191 cytochrome c oxidase complex a molecular function unknown mitochondrial inner membrane | YJR035W	14	21	0.78786	0.51725	0.95183	1.05255	1.01039	0.69464	0.55623	0.427595	0.657325	0.746355	0.88155	0.484465	0.431115	0.324515	0.356745	0.409475	0.27288	0.24178
YPR040W	14 - YPR040W ... TIP41 signal transduction molecular function unknown cytoplasm* | YPR041W	14	21	0.70613	0.6545	0.97121	0.73435	0.87298	1.06033	0.59715	0.490235	0.787755	0.488785	0.44186	0.595525	0.597895	0.466335	0.634785	0.426885	0.05659	0.50113
YLR417W	14 - YLR417W ... VPS36 protein-vacuolar targeting* regulator of G-protein signaling acESCRT II complex | YLR418C	14	21	0.62939	0.70932	0.94956	0.81648	0.93776	0.81447	0.23972	0.869405	0.444005	0.569485	0.35591	0.763915	0.388465	0.520995	0.392925	0.067415	0.54686	0.22322
YIR015W	14 - YIR015W ... RPR2 tRNA processing ribonuclease P activity nucleolar ribonuclease P complex | YIR016W	14	21	0.97148	0.73884	0.46244	0.48557	0.42784	0.80826	0.83089	0.373245	0.733625	0.905275	0.81628	0.639605	0.283945	0.075315	0.327515	0.134555	0.05004	0.50762
YOR221C	14 - YOR221C ... MCT1 aerobic respiration* [acyl-carrier protein] S-malonyltramitochondrion | YOR222W	14	21	0.91779	0.51414	0.65117	0.18882	0.9611	0.78619	0.94888	0.588255	0.281465	0.693805	0.64478	0.883695	0.203615	-0.153325	0.134075	0.244975	0.07262	0.59397
YDR517W	14 - YDR517W ... GRH1 mitotic spindle checkpoint molecular function unknown cytoplasm | YDR518W	14	21	0.92109	0.67941	0.8899	0.92121	0.78053	0.70352	0.71788	0.956795	0.477595	0.311695	0.41779	0.854005	0.435885	0.141965	0.167145	0.148685	0.25189	0.3109
YBR076W	14 - YBR076W ... ECM8 cell wall organization and bio molecular function unknown cellular component unknown | YBR077C	14	21	0.7315	1.2114	0.93035	0.6866	0.84563	0.99006	0.50007	0.470795	0.578165	0.843415	0.60009	0.775015	-0.108855	0.080855	-0.004355	0.288305	0.28386	0.32957
YOR300W	14 - YOR300W ˜ dubious orfYOR329W-A	14	21	0.87432	0.84761	1.23765	0.74189	1.02941	1.06116	0.57977	-0.043715	0.438685	0.560055	0.59942	0.533955	-0.061175	0.185015	0.179455	0.337505	-0.1197	0.17923
YDL057W	14 - YDL057W ... YDL057W biological process unknown molecular function unknown cellular component unknown | YDL058W	14	21	0.81185	0.63471	0.58665	0.50059	0.81623	0.86328	0.27466	0.578065	0.161195	0.560515	0.30069	0.536095	0.152365	0.700575	0.034085	0.249005	0.3354	0.19278
YDR259C	14 - YDR259C ... YAP6 positive regulation of transcr RNA polymerase II transcription facnucleus | YDR260C	14	21	0.80074	1.27333	0.75244	0.90201	0.63314	1.0804	0.7315	-0.045385	0.475655	0.555275	0.80642	0.624275	0.720795	0.290715	0.587025	0.332605	0.30448	0.37742
YLR246W	14 - YLR246W ... ERF2 protein-membrane targeting* protein-cysteine S-palmitoleyltransintegral to endoplasmic reticulum m | YLR247C	14	21	0.66793	0.79697	0.58881	1.04495	0.88223	0.75733	0.16573	0.422165	0.259695	0.658315	0.19074	0.273665	0.189055	0.548125	0.222035	0.082315	0.47934	0.32907
YMR316C-B	14 - YMR316C-B ... | YMR316W	14	21	0.76531	0.70713	0.43854	0.84189	1.11821	0.49453	0.38456	0.571545	0.376615	0.727655	0.51117	0.393105	0.323155	0.186035	0.131075	0.245005	0.06039	0.56744
YEL023C	14 - YEL023C ... YEL023C biological process unknown molecular function unknown cellular component unknown | YEL024W	14	21	0.5374	0.82611	0.84754	0.74432	0.64882	1.02364	0.39306	0.440435	0.374575	0.494885	0.44852	0.459785	0.483735	0.929385	0.457135	0.501735	0.40048	0.53383
YOR111W	14 - YOR111W ... YOR111W biological process unknown molecular function unknown cellular component unknown | YOR112W	14	21	0.92631	0.78586	0.69067	0.69972	0.97473	0.89508	0.42785	0.780595	0.481705	0.474335	0.43521	0.418065	0.383965	0.778945	0.592385	0.647745	0.58705	0.54086
YBR270C	14 - YBR270C ... BIT2 biological process unknown molecular function unknown cellular component unknown | YBR271W	14	21	0.82696	1.01814	0.6936	0.56424	0.70011	0.74172	0.44089	0.479215	0.231225	0.559075	0.18078	0.235275	0.424795	0.586385	0.323355	0.363475	0.4398	0.73103
YML076C	14 - YML076C ... WAR1 response to acid transcription factor activity nucleus* | YML077W	14	21	1.02766	0.6946	0.91669	0.6466	1.05963	1.04037	0.51116	0.313175	0.392565	0.523305	0.28056	0.534955	0.682855	0.623085	0.687175	0.482735	0.63876	0.7604
YKL208W	14 - YKL208W ... CBT1 mRNA processing* molecular function unknown mitochondrion | YKL209C	14	21	0.76438	0.82755	0.59774	0.71054	0.60109	1.10113	0.47601	0.501695	0.139935	0.329295	0.34568	0.319905	0.466425	0.612215	0.400035	0.452535	0.88094	0.6193
YNL108C	14 - YNL108C ... YNL108C metabolism molecular function unknown cytoplasm* | YNL109W	14	21	1.00933	0.75859	1.2096	0.80683	1.19862	0.78171	0.87843	0.504205	0.747655	0.847045	0.68048	0.678605	0.472545	0.303935	0.602265	0.275905	0.75309	0.62096
YPR107C	14 - YPR107C ... YTH1 mRNA polyadenylylation* RNA binding mRNA cleavage and polyadenylation s | YPR108W	14	21	1.17856	0.78039	1.15744	1.07792	0.86569	1.01169	0.82467	0.760895	0.588345	0.831915	0.77971	0.927465	0.490025	0.489905	0.517185	0.543945	0.41786	0.31931
YOR008C	14 - YOR008C ... SLG1 cell wall organization and bio transmembrane receptor activity membrane fraction* | YOR008C-A	14	21	0.94059	0.92957	0.89449	1.08671	0.84038	0.8811	0.64889	0.793205	0.573355	0.647335	0.56889	0.664895	0.511045	0.544175	0.647605	0.508995	0.73584	0.65578
YPL060W	14 - YPL060W ... LPE10 mitochondrial magnesium ion tr magnesium ion transporter activity mitochondrial inner membrane | YPL061W	14	21	0.92546	1.07049	0.88164	0.8971	1.05721	1.22816	0.42391	0.623745	0.711755	0.653985	0.58275	0.497395	0.717585	0.537545	0.520875	0.609945	0.75773	0.3149
YGR197C	14 - YGR197C ... SNG1 response to drug molecular function unknown membrane | YGR198W	14	21	0.71812	0.74798	0.93146	0.96724	1.00826	0.5058	0.81544	0.867125	0.835785	0.722545	0.73158	0.823005	0.267655	0.379715	0.403585	0.459115	0.42394	0.50173
YKL171W	14 - YKL171W ... YKL171W proteolysis and peptidolysis protein kinase activity cytoplasm | YKL172W	14	21	0.94641	0.74449	0.7765	0.73271	1.03988	0.90944	0.82911	0.832955	0.654655	1.07652	0.51354	0.870665	0.177755	0.376285	0.263885	0.351495	0.23688	0.47833
YDR202C	14 - YDR202C ... RAV2 vacuolar acidification* molecular function unknown RAVE complex | YDR203W	14	21	0.9468	0.49124	0.70523	0.63891	0.58371	0.65533	0.50733	0.861845	0.620845	1.02978	0.68145	0.842755	0.173915	0.391365	0.481095	0.434365	0.47898	0.55574
YOR070C	14 - YOR070C ... GYP1 vesicle-mediated transport Rab GTPase activator activity mitochondrion* | YOR071C	14	21	0.75565	0.57296	0.9081	0.73282	0.68521	0.67727	0.65646	0.711875	0.511535	0.856215	0.64183	1.04327	0.306835	0.424625	0.470555	0.344565	0.55472	0.42448
YLR037C	14 - YLR037C ... DAN2 biological process unknown molecular function unknown cell wall (sensu Fungi) | YLR038C	14	21	0.61059	0.56322	0.76061	0.64951	0.8161	1.05504	0.74436	0.555855	0.621635	1.1992	0.85113	0.704745	0.501155	0.281245	0.298625	0.444555	0.41012	0.06933
YMR325W	50 - YMR325W ... YMR325W biological process unknown molecular function unknown cellular component unknown | YMR326C	50	21	1.57264	2.59618	1.75265	2.36743	1.53663	2.02092	1.17669	0.772025	1.32342	1.65715	0.87739	1.68093	0.415845	0.734425	0.220295	1.04012	0.08465	0.95624
YFL016C	50 - YFL016C ... MDJ1 protein folding* unfolded protein binding* mitochondrial inner membrane | YFL017C	50	21	1.81913	1.73059	2.13337	1.66152	0.89237	1.43996	1.137	1.09908	1.47514	1.2284	1.22645	1.25111	0.731445	0.647035	0.937705	0.656435	0.86867	0.80618
YOL114C	50 - YOL114C ... YOL114C biological process unknown molecular function unknown cellular component unknown | YOL115W	50	21	1.92997	1.58889	1.82459	1.46759	1.24592	1.44627	0.92712	0.798445	1.16552	1.76748	1.16741	1.65149	0.793545	0.582745	0.774265	0.560085	0.53276	0.70957
YBL108C-A	50 - YBL108C-A ... YBL108C-A biological process unknown molecular function unknown cellular component unknown | YBL108W	50	21	1.87448	1.70886	1.99439	1.54093	1.86469	1.50305	1.47937	0.450345	1.18131	0.857355	1.11903	1.01788	1.15193	0.739995	1.17083	1.0259	0.7428	1.06949
YBR196C-B	50 - YBR196C-B ... YBR196C-B biological process unknown molecular function unknown cellular component unknown | YBR197C	50	21	2.29737	1.72769	1.70549	2.0284	1.09781	1.75879	1.01499	1.54577	1.6215	1.12313	1.086	0.976415	0.565185	0.680445	0.452135	0.933945	0.12969	0.38486
YOR394W	50 - YOR394W ˜ PAU21 biological process unknown molecular function unknown | Putative protein of unknown functionYOR396W	50	21	1.58358	2.62045	1.57329	2.29308	1.41089	1.97075	0.90761	1.0836	1.14604	1.31317	0.9644	1.22391	0.556675	0.748865	0.549815	0.375815	0.46928	0.46511
YBR196C-A	50 - YBR196C-A ... YBR196C-A biological process unknown molecular function unknown cellular component unknown | YBR196C-B	50	21	1.71445	2.14457	1.56597	2.19117	1.66322	1.5415	1.22071	1.16969	1.69142	0.824655	1.04252	1.07973	0.403115	0.464615	0.179025	0.480575	0.15052	1.01287
YLR164W	50 - YLR164W ... YLR164W biological process unknown molecular function unknown mitochondrial inner membrane | YLR165C	50	21	1.84228	0.80998	1.80599	1.78624	2.25903	1.84832	1.2846	0.754745	0.998545	1.43188	1.24798	0.841315	0.552405	0.218625	0.619065	0.641955	0.44391	0.69061
YDR270W	50 - YDR270W ... CCC2 intracellular copper ion trans copper-exporting ATPase activity Golgi trans face | YDR271C	50	21	1.56605	1.41687	1.44929	1.75589	1.62839	1.77636	1.06188	0.926905	0.713275	1.07305	1.54701	1.01533	0.867405	0.877655	1.09556	-0.570955	1.14601	0.98021
YCR104W	50 - YCR104W ... PAU3 biological process unknown molecular function unknown cellular component unknown | YCR105W	50	21	1.88078	2.50522	1.44967	2.06706	1.16875	1.82499	1.08207	0.854325	0.929015	1.60936	0.83523	1.833	0.488385	0.818125	0.755215	1.28919	0.52544	0.40323
YIR041W	50 - YIR041W ˜ PAU15 biological process unknown molecular function unknown | Putative protein of unknown functionYIR042C	50	21	1.75446	2.1526	1.78	2.23633	1.50276	1.91406	1.39838	0.862205	1.37434	1.3734	0.80053	1.67807	1.01128	0.498375	0.696205	1.13123	0.59345	0.88419
YGL261C	50 - YGL261C ... YGL261C biological process unknown molecular function unknown cellular component unknown | YGL262W	50	21	1.44594	1.39743	1.60588	1.34512	1.35982	1.3208	1.2475	0.717125	1.08418	1.41456	1.28284	1.12092	0.928495	0.649575	0.987895	1.03052	0.26755	0.94656
YML053C	50 - YML053C ... YML053C biological process unknown molecular function unknown cytoplasm* | YML054C	50	21	1.41882	1.55437	1.43459	1.12003	0.84198	1.57279	0.95802	0.811435	1.22182	1.1747	0.89432	0.972415	0.876625	0.292985	0.599245	0.389415	0.12057	0.23378
YBR126W-A	50 - YBR126W-A ˜ Dubious Dubious ORF unlikely to encode a protein, based on available experimental and comparative sequence data; partially overlaps the dubious ORF YBR126W-B; identified by gene-trapping, microarray analysis, and genome-wide homology searchesYBR126W-B	50	21	1.07061	1.12785	1.75121	1.28431	1.80656	0.92176	1.07226	0.318695	1.0447	0.648465	1.55055	0.597885	0.735935	0.010135	0.444185	0.138415	0.69136	0.63221
YBR126W-B	50 - YBR126W-B ˜ Dubious Identified by SAGEYBR131C-A	50	21	1.13583	0.97248	1.33566	1.21477	1.96672	1.04843	0.88769	0.711955	0.878295	0.512755	1.41481	0.672475	0.272895	0.269775	0.269925	0.273075	0.66276	0.62198
YEL049W	50 - YEL049W ... PAU2 biological process unknown molecular function unknown cellular component unknown | YEL050C	50	21	1.55234	1.39444	1.52632	1.50137	1.59193	1.86708	1.06431	0.741015	0.729195	0.305375	0.96701	1.09017	0.857125	0.687885	0.829865	0.883645	0.70791	0.63608
YHL044W	50 - YHL044W ... YHL044W biological process unknown molecular function unknown plasma membrane | YHL045W	50	21	1.50379	1.21157	1.52765	1.83584	1.35914	1.90852	1.00383	1.45182	1.17962	1.27411	0.83169	1.27913	0.487275	0.871845	0.548445	0.337145	0.32312	1.17639
YFR041C	50 - YFR041C ... ERJ5 biological process unknown molecular function unknown endoplasmic reticulum | YFR042W	50	21	1.32284	1.52442	1.50742	1.52157	1.01456	1.30684	0.89137	0.959935	1.40653	1.06577	1.43465	1.22996	0.939445	1.25857	0.837935	0.556305	0.88676	0.75857
YGR294W	50 - YGR294W ... YGR294W biological process unknown molecular function unknown cellular component unknown | YGR295C	50	21	1.14302	1.33014	1.91629	1.49133	1.37245	1.20011	1.1014	0.675945	1.16199	1.10581	0.92458	1.18673	0.770115	0.834185	0.728665	0.707475	0.51528	1.29505
YDR542W	50 - YDR542W ... YDR542W biological process unknown molecular function unknown cellular component unknown | YDR543C	50	21	1.41588	1.70471	1.74561	1.56127	1.73209	1.13135	0.95442	0.436695	0.826415	1.27238	0.92051	1.08781	0.838945	0.617235	0.774525	0.852255	0.75111	0.9369
YJL223C	50 - YJL223C ... PAU1 biological process unknown molecular function unknown cellular component unknown | YJL225C	50	21	1.59904	1.5983	1.96032	1.65267	1.69142	1.25008	1.00614	0.528955	0.683085	1.1543	0.91298	0.998195	0.644465	0.952195	1.03629	0.853365	0.78341	1.35596
YLR461W	50 - YLR461W ... PAU4 biological process unknown molecular function unknown cellular component unknown | YLR462W	50	21	1.49976	1.70494	1.77002	1.6461	1.67335	1.54108	1.00517	0.475245	0.979995	1.18423	0.8302	0.908815	0.906785	0.991675	0.910305	0.948945	0.70036	1.15064
YHL046C	50 - YHL046C ... YHL046C biological process unknown molecular function unknown cellular component unknown | YHL046W-A	50	21	1.56458	1.60809	1.68856	1.30173	1.40839	1.37004	1.14645	0.570095	1.09817	1.60342	1.02633	1.04133	0.759045	0.597515	0.884335	0.745815	0.59987	1.22164
YLL064C	50 - YLL064C ... YLL064C biological process unknown molecular function unknown cellular component unknown | YLL065W	50	21	1.54181	1.44094	1.55997	1.44948	1.38808	1.24638	1.00875	0.340015	0.965665	1.24158	0.88279	1.10295	0.854365	0.728625	0.733005	0.677545	0.70302	0.59042
YPR005C	50 - YPR005C ... HAL1 positive regulation of transcr molecular function unknown cytoplasm | YPR006C	50	21	1.52687	1.06747	1.12686	1.20986	1.28223	1.42095	0.86609	0.819085	1.35825	1.35079	1.13446	0.965985	0.532885	0.384535	0.713835	1.06879	0.42917	0.72279
YGR161W-C	50 - YGR161W-C ... YGR161W-C biological process unknown molecular function unknown cellular component unknown | YGR162W	50	21	1.49805	1.49058	1.81066	1.82281	1.5531	1.17381	0.78535	0.978355	1.00082	0.891985	1.04103	1.13654	0.205405	0.279105	0.896255	0.648485	0.97783	0.87665
YOL059W	50 - YOL059W ... GPD2 glycerol metabolism glycerol-3-phosphate dehydrogenase mitochondrion* | YOL060C	50	21	1.42464	1.2827	1.2706	1.37238	1.48526	1.22724	0.57621	0.945945	0.910665	0.888035	0.43765	0.626105	0.630225	0.370985	0.364485	0.250535	0.30097	0.21231
YLR326W	50 - YLR326W ... YLR326W biological process unknown molecular function unknown cellular component unknown | YLR327C	50	21	1.54218	1.62279	1.56587	1.60436	1.7232	1.45563	0.95207	0.882975	1.5115	1.35133	1.34681	1.15745	0.482675	0.704555	0.657015	0.498855	0.54528	0.60297
YOR267C	50 - YOR267C ... HRK1 cell ion homeostasis protein kinase activity cytoplasm | YOR268C	50	21	1.45423	1.54291	1.60523	1.5964	0.72115	1.41744	0.78518	0.657675	1.13416	1.25958	1.02255	1.01438	0.546935	0.342025	0.507735	0.254125	0.37655	0.39191
YMR056C	50 - YMR056C ... AAC1 aerobic respiration* ATP:ADP antiporter activity mitochondrial inner membrane | YMR057C	50	21	1.65886	1.59415	1.38576	1.85888	1.42685	1.12539	0.93098	0.955805	1.37462	0.772765	0.94585	0.836055	0.122985	0.119495	-0.005145	0.397755	0.1465	0.84733
YJR151C	50 - YJR151C ... DAN4 biological process unknown molecular function unknown cell wall (sensu Fungi) | YJR151W-A	50	21	1.33551	1.62105	1.39556	1.65797	1.43952	1.28588	1.1999	1.12709	1.19683	1.36444	1.05159	1.03171	0.132265	0.235085	0.075705	0.592615	-0.028	0.56424
YNL202W	50 - YNL202W ... SPS19 sporulation (sensu Fungi)* "2,4-dienoyl-CoA reductase (NADPH) a"peroxisomal matrix | YNL203C	50	21	1.45733	1.27443	1.05382	1.65788	1.52632	1.67602	1.08008	1.11	0.902475	0.919685	0.89382	1.14786	0.293795	0.119095	0.198395	0.291225	0.14629	0.35712
YOL015W	50 - YOL015W ˜ IRC10 biological process unknown molecular function unknown | Putative protein of unknown function; null mutant displays increased levels of spontaneous Rad52p fociYOL016C	50	21	1.30971	1.42255	1.03029	1.1815	1.04652	1.71273	0.65284	1.01269	0.993825	1.52174	0.45809	1.27961	0.414265	0.678115	0.508315	0.946755	0.33025	0.93511
YPL156C	50 - YPL156C ... PRM4 conjugation with cellular fusi molecular function unknown integral to membrane | YPL157W	50	21	1.47349	1.59916	1.5781	1.57672	1.4736	1.46656	0.69544	0.475915	0.742455	1.08858	0.94085	1.01337	0.179765	0.755485	0.432375	-0.447145	0.08006	0.25659
YPL282C	50 - YPL282C ˜ PAU22 biological process unknown molecular function unknown | Putative protein of unknown functionYPL283C	50	21	1.23348	2.41043	1.15991	1.40139	0.86926	1.48166	0.58451	0.858445	0.986675	1.14935	0.77858	1.32723	0.350475	0.770465	0.121595	1.11875	0.56504	0.54202
YOR245C	50 - YOR245C ... DGA1 triacylglycerol biosynthesis* diacylglycerol O-acyltransferase aclipid particle | YOR246C	50	21	1.23982	1.02805	1.26673	1.35731	0.99295	1.12872	1.27561	1.2756	1.2975	1.28696	1.24389	1.44948	0.338825	0.438405	0.476595	0.536105	0.59443	0.96802
YCL044C	50 - YCL044C ˜ MGR1 biological process unknown molecular function unknown | Subunit of the mitochondrial (mt) i-AAA protease supercomplex, which degrades misfolded mitochondrial proteins; forms a subcomplex with Mgr3p that binds to substrates to facilitate proteolysis; required for growth of cells lacking mtDNAYCL045C	50	21	1.28902	1.49506	1.68826	1.44652	1.28219	0.85292	1.49208	0.715285	1.35903	1.37101	1.49014	1.43363	0.818185	0.492435	0.874435	0.745795	0.67363	0.99096
YDL181W	50 - YDL181W ... INH1 ATP synthesis coupled proton t enzyme inhibitor activity proton-transporting ATP synthase co | YDL182W	50	21	1.43279	1.3119	1.74932	1.39942	1.69217	1.43089	1.65349	1.00046	1.46219	1.50761	1.75462	1.28344	0.431535	0.321295	0.531455	0.423845	0.64054	0.20271
YLR408C	50 - YLR408C ... YLR408C biological process unknown molecular function unknown endosome | YLR409C	50	21	1.65214	0.9551	1.76655	1.09864	1.53225	1.44701	1.79887	1.21035	1.66532	1.51666	1.72271	0.739585	0.837525	0.590925	0.509225	0.746605	0.55697	0.82914
YNL006W	50 - YNL006W ... LST8 transport* protein binding Golgi membrane* | YNL007C	50	21	1.76446	1.68774	2.22192	2.28973	1.26069	1.50023	0.63762	0.825405	0.707465	0.449675	0.61255	0.764865	-0.095765	0.214895	0.453565	0.400145	0.23067	0.28906
YOL025W	21 - YOL025W ... LAG2 replicative cell aging molecular function unknown mitochondrion | YOL026C	21	24	1.07883	1.12193	0.96182	1.01806	0.98228	0.98546	1.08935	1.03523	1.00059	1.24791	0.90831	1.10044	0.597515	0.706735	0.801985	0.890925	0.69173	0.93976
YFR022W	21 - YFR022W ... ROG3 biological process unknown molecular function unknown cellular component unknown | YFR023W	21	24	1.08673	0.93386	1.45351	1.06653	1.00747	0.87432	0.93177	0.997195	0.675365	0.987535	0.78561	0.802225	0.136505	0.376555	0.380215	0.748565	0.25729	0.82771
YBR161W	21 - YBR161W ... CSH1 sphingolipid biosynthesis* mannosyltransferase activity* vacuole (sensu Fungi) | YBR162C	21	24	0.83977	1.20432	1.16305	1.28299	1.22356	1.40953	1.06023	1.17918	0.879245	0.873365	0.75245	1.17742	0.057135	0.581575	0.449585	0.405065	0.45171	0.78082
YNR035C	21 - YNR035C ... ARC35 actin cytoskeleton organizatio structural molecule activity cytosol* | YNR036C	21	24	0.6913	0.79839	0.8162	0.57125	0.92227	0.9993	1.06999	1.16324	0.903225	1.14813	1.08899	1.13213	0.818505	0.804825	0.725145	0.891425	0.90993	0.72308
YDL035C	21 - YDL035C ... GPR1 pseudohyphal growth* G-protein coupled receptor activityplasma membrane | YDL036C	21	24	0.66406	1.21151	0.94899	1.06075	0.79439	1.15446	0.8921	1.42606	1.26086	1.25292	0.95075	1.25543	0.472105	0.779895	0.636165	0.563885	0.78179	0.9066
YDR105C	21 - YDR105C ... TMS1 biological process unknown molecular function unknown membrane* | YDR106W	21	24	0.50375	0.96843	0.70863	0.84714	0.72383	0.69951	0.92414	1.05212	1.0298	0.970835	0.93396	0.942375	0.449215	0.456595	0.423375	0.302325	0.78032	0.86493
YNL130C	21 - YNL130C ... CPT1 phosphatidylcholine biosynthes diacylglycerol cholinephosphotransfendoplasmic reticulum | YNL130C-A	21	24	0.59321	0.71452	0.76315	0.8273	0.5593	0.80309	0.85213	0.714365	0.958635	0.736505	0.96293	0.972555	0.610465	0.391255	0.632645	0.626865	0.69652	0.58346
YIL007C	21 - YIL007C ... NAS2 ubiquitin-dependent protein ca molecular function unknown cytoplasm | YIL008W	21	24	0.86404	0.84441	0.98316	1.09359	0.73117	0.98095	1.10004	1.08424	0.963235	1.25521	0.9426	1.24473	0.443965	0.865065	0.601505	0.576455	0.66709	0.51477
YLR093C	21 - YLR093C ... NYV1 vesicle fusion v-SNARE activity vacuolar membrane | YLR094C	21	24	0.87822	0.64048	0.68121	0.88752	0.77262	0.79839	0.66593	1.148	0.915525	1.04384	0.9065	1.1397	0.457945	0.547775	0.697405	0.493465	0.37702	0.47609
YGR038W	21 - YGR038W ... ORM1 response to unfolded protein molecular function unknown endoplasmic reticulum | YGR039W	21	24	0.85735	0.71232	0.83484	1.05368	0.64352	0.6779	1.21153	1.37031	1.31506	0.968315	1.10657	1.15409	0.334765	0.408185	0.496945	0.454385	0.51758	0.68503
YLR248W	21 - YLR248W ... RCK2 protein amino acid phosphoryla protein serine/threonine kinase actcytoplasm | YLR249W	21	24	0.85021	0.94839	0.97122	1.07432	0.75065	1.0336	1.12404	1.38465	1.20023	1.35949	1.02658	1.40417	0.681495	0.558895	0.744885	0.708855	0.73716	0.67345
YCR009C	21 - YCR009C ... RVS161 endocytosis* cytoskeletal protein binding actin cortical patch* | YCR010C	21	24	0.75717	0.80147	0.80908	0.82768	0.81882	0.85597	1.08012	1.05547	1.00537	1.02886	1.0483	1.16934	0.668525	0.882875	0.822335	0.634085	0.50582	0.74426
YAR019C	21 - YAR019C ... CDC15 protein amino acid phosphoryla protein kinase activity bud neck* | YAR020C	21	24	0.7905	0.76745	0.79096	0.7069	0.88028	0.55631	1.24408	1.1156	0.972085	1.2224	0.97405	0.909215	0.347075	0.516185	0.622425	0.633315	0.59131	0.7668
YNR047W	21 - YNR047W ˜ FPK1 response to pheromone protein kinase activity | Protein kinase proposed to regulate the putative phospholipid translocases Lem3p-Dnf1p/Dnf2p; overexpression interferes with pheromone-induced growth arrest; localizes to the cytoplasm, early endosome/TGN compartments, and plasma membraneYNR048W	21	24	0.69955	0.70165	0.71308	0.56907	0.8541	0.48243	1.10753	0.876985	0.933795	1.21995	0.9457	1.05154	0.538195	0.462815	0.576955	0.537305	0.64286	0.61408
YDR307W	21 - YDR307W ... YDR307W biological process unknown molecular function unknown endoplasmic reticulum | YDR308C	21	24	0.74389	0.90053	0.9571	1.14521	0.75044	0.68826	1.13132	1.20314	1.00025	0.975225	1.08441	1.16341	0.487275	0.747575	0.750635	0.864665	0.64058	0.94891
YKL126W	21 - YKL126W ... YPK1 protein amino acid phosphoryla protein serine/threonine kinase actcytosol* | YKL127W	21	24	0.83978	0.63655	0.94066	0.80713	0.74759	0.65933	1.06551	1.27607	0.733905	0.963935	1.0054	1.00462	0.645715	0.616375	0.809075	0.569105	0.68971	0.66444
YPR028W	21 - YPR028W ... YOP1 vesicle-mediated transport protein binding integral to membrane | YPR029C	21	24	0.70376	0.69293	0.70875	0.80509	0.82024	0.54918	1.26154	1.26809	1.11767	1.29967	1.50995	1.21572	0.606475	0.616445	0.812375	0.553385	0.92828	0.75048
YPL100W	21 - YPL100W ... ATG21 autophagy* phosphoinositide binding cytosol* | YPL101W	21	24	0.51941	0.5306	0.5486	0.58742	0.474	0.73213	0.84191	0.828315	0.731975	0.984935	0.67261	1.01526	0.599445	0.533945	0.409315	0.416255	0.61307	0.67057
YJL068C	21 - YJL068C iESR cluster YJL068C formaldehyde catabolism carboxylesterase activity cytosol | YJL069C	21	24	0.91221	0.56601	0.93616	0.46809	1.08787	0.7246	1.38316	1.32278	0.923445	1.08794	1.38743	1.26307	0.631655	0.651145	0.725895	0.594415	0.52532	0.75396
YLR436C	21 - YLR436C ... ECM30 cell wall organization and bio molecular function unknown cytoplasm | YLR437C	21	24	0.66616	0.79347	0.89306	0.58685	0.74179	0.60294	1.08016	1.06143	0.993255	0.755435	0.76252	0.930265	0.449435	0.246195	0.416185	0.621085	0.43275	0.61109
YDR084C	21 - YDR084C ... TVP23 biological process unknown molecular function unknown cytoplasm | YDR085C	21	24	0.42724	0.6076	0.69607	0.50503	0.80773	0.55817	0.81722	0.758845	1.17501	0.910145	1.18847	0.950105	0.554905	0.401995	0.626885	0.592895	0.63984	0.84233
YLR219W	21 - YLR219W ... MSC3 meiotic recombination molecular function unknown cellular component unknown | YLR220W	21	24	0.54409	0.76138	0.84416	0.40411	0.63918	0.71493	0.90885	0.937395	1.16099	1.24628	1.08335	1.1985	0.549725	0.314335	0.611335	0.472505	0.42941	0.78614
YOL100W	21 - YOL100W ... PKH2 protein amino acid phosphoryla protein kinase activity nucleus | YOL101C	21	24	0.8149	0.80369	0.64958	0.4473	0.61273	0.92978	1.07735	1.07282	1.38309	1.22955	1.22994	1.15643	0.973005	0.758865	0.764735	0.673105	0.50167	0.7735
YOR208W	21 - YOR208W ... PTP2 protein amino acid dephosphory protein tyrosine phosphatase activinucleus | YOR209C	21	24	0.53804	0.59899	0.52738	0.44766	0.66465	0.74274	0.95892	0.705205	0.544435	1.06231	0.87754	0.996985	0.444745	0.356585	0.581635	0.441545	0.3278	0.60184
YDR387C	21 - YDR387C ... YDR387C biological process unknown permease activity cellular component unknown | YDR388W	21	24	0.52037	0.77816	0.69103	0.78529	0.64786	0.76614	0.9841	0.770685	1.1865	1.14244	1.0829	1.09658	0.250355	0.327335	0.381855	0.557955	0.70251	0.80993
YMR155W	21 - YMR155W iESR cluster YMR155W biological process unknown molecular function unknown cellular component unknown | YMR156C	21	24	0.65277	0.20874	0.592	0.7966	0.66749	0.46631	1.01276	1.00984	0.926395	0.997655	0.87624	0.913705	0.149805	0.211325	0.375045	0.262175	0.48539	0.53622
YJL059W	21 - YJL059W ... YHC3 intracellular protein transpor basic amino acid transporter activivacuole (sensu Fungi) | YJL060W	21	24	0.6438	0.74113	0.51408	0.56197	0.4922	0.3882	1.16491	1.13979	1.23072	1.39135	1.0739	1.2246	0.307255	0.485235	0.465235	0.522035	0.41865	0.68475
YNL321W	21 - YNL321W ˜ VNX1 biological process unknown molecular function unknown | Low affinity vacuolar membrane localized monovalent cation/H+ antiporter; member of the calcium exchanger (CAX) family; potential Cdc28p substrateYNL322C	21	24	0.68741	0.69013	0.56436	0.68682	0.48586	0.24695	1.24105	1.19854	1.24442	1.01798	1.13287	1.11245	0.571865	0.302815	0.574195	0.582655	0.7714	0.73971
YDL180W	21 - YDL180W ... YDL180W biological process unknown molecular function unknown vacuole (sensu Fungi) | YDL181W	21	24	0.80814	0.99001	0.7838	1.10903	0.93772	1.06366	0.76253	1.27042	0.849745	1.0172	0.8517	1.10898	0.433315	0.367435	0.650605	0.710205	0.63746	0.78334
YMR210W	21 - YMR210W ... YMR210W biological process unknown molecular function unknown cellular component unknown | YMR211W	21	24	0.81393	0.6622	1.02175	1.07423	1.0407	0.89086	0.74673	1.001	0.851485	0.802625	0.68084	0.840635	0.342335	0.654845	0.416685	0.412735	0.68441	0.63665
YOR138C	21 - YOR138C ... RUP1 biological process unknown molecular function unknown cytoplasm* | YOR139C	21	24	0.87597	0.75355	0.98979	0.6347	1.13162	0.88905	0.77946	0.975615	0.947015	0.928575	1.09258	0.827705	0.572335	0.439685	0.537575	0.314395	0.55587	0.58523
YKR016W	21 - YKR016W ˜ AIM28 biological process unknown molecular function unknown mitochondrion | Mitochondrial inner membrane protein involved in formation and molecular structure of crista junctions; impairs oligomerization of F1F0-ATP synthase; null shows altered mitochondrial morphology and abnormal mitochondrial genome maintenanceYKR017C	21	24	0.87716	0.88144	0.67373	0.89798	0.55383	0.68521	0.78448	0.866645	1.21684	0.800235	1.08246	0.812965	0.797605	0.599525	0.623425	0.297695	0.5799	0.25964
YOR380W	21 - YOR380W ... RDR1 response to xenobiotic stimulu transcription factor activity nucleus | YOR381W	21	24	0.56151	0.56406	0.56237	0.77041	0.90044	0.90828	0.96024	1.13481	0.740795	1.03619	0.98699	0.956755	0.197635	0.359205	0.480005	0.396425	0.46351	0.42664
YHR158C	21 - YHR158C ... KEL1 cellular morphogenesis* molecular function unknown cytoplasm* | YHR159W	21	24	0.76346	1.28501	0.83261	1.02488	0.61203	0.87742	0.72327	0.988915	0.996765	1.08174	1.09856	1.0192	0.479985	0.410645	0.408885	0.362725	0.46911	0.46802
YDR246W	21 - YDR246W ... TRS23 ER to Golgi transport molecular function unknown TRAPP complex | YDR246W-A	21	24	1.11126	1.17424	1.00859	0.81785	0.70424	1.11194	0.864	0.492275	1.10241	1.27462	1.22809	0.959685	0.645605	0.504425	0.790675	0.518595	0.34997	0.78118
YMR298W	21 - YMR298W ... LIP1 ceramide biosynthesis sphingosine N-acyltransferase activendoplasmic reticulum* | YMR299C	21	24	0.81172	0.7613	0.60509	0.7392	0.63782	0.71976	1.01692	0.636675	1.03182	0.994665	1.05829	0.915305	0.576525	0.297385	0.608935	0.431475	0.2401	0.33585
YEL024W	21 - YEL024W ... RIP1 aerobic respiration* ubiquinol-cytochrome-c reductase acrespiratory chain complex III (sens | YEL025C	21	24	0.9672	1.006	1.00163	1.21117	1.08409	0.87394	1.09377	1.44782	0.965695	0.977795	1.06979	1.07753	0.170015	0.193745	0.216135	0.447325	0.6343	0.46777
YOL105C	21 - YOL105C ... WSC3 cell wall organization and bio transmembrane receptor activity membrane fraction | YOL106W	21	24	1.10018	1.19379	1.0147	1.01703	0.97925	0.95098	1.02321	1.10278	1.14664	0.779655	1.10224	0.743165	0.146325	0.211405	0.313845	0.255005	0.19919	0.52178
YJR019C	21 - YJR019C ... TES1 fatty acid oxidation acyl-CoA thioesterase activity mitochondrion* | YJR020W	21	24	0.78493	0.97633	0.98746	0.88779	1.0698	0.57165	1.15596	1.19589	1.05967	1.02607	1.09456	1.17925	0.327485	0.150735	0.345115	0.255775	0.22115	0.54817
YJL205C	21 - YJL205C ... NCE101 protein secretion molecular function unknown cellular component unknown | YJL206C	21	24	0.81101	0.59407	0.75685	0.52445	0.91814	0.52204	0.94112	0.791625	0.959685	1.02314	0.87126	0.709695	0.348365	0.173935	0.419595	0.306895	0.58157	0.52991
YJL171C	21 - YJL171C ... YJL171C biological process unknown molecular function unknown mitochondrion* | YJL172W	21	24	0.6963	1.03175	1.09511	1.08406	0.74644	0.49891	0.92254	1.36095	1.06753	0.805735	1.10962	1.10617	0.347495	0.622825	0.653345	0.501655	0.84013	0.46592
YDR014W-A	21 - YDR014W-A ˜ HED1 biological process unknown molecular function unknown | Meiosis-specific protein that down-regulates Rad51p-mediated mitotic recombination when the meiotic recombination machinery is impaired; early meiotic gene, transcribed specifically during meiotic prophaseYDR015C	21	24	0.50672	1.11575	0.46585	0.50574	0.26495	1.12562	0.85269	1.23744	1.11922	1.24091	0.82849	0.942685	0.530375	0.563355	0.731505	0.387025	0.5622	0.66825
YBR111C	21 - YBR111C ... YSA1 biological process unknown phosphoribosyl-ATP diphosphatase accytoplasm* | YBR111W-A	21	24	0.72894	0.41498	0.52081	0.39156	0.71471	0.76773	0.87315	1.19463	1.11007	0.629435	1.21908	0.948175	0.914565	0.557295	0.588765	0.571685	0.7915	0.50189
YGR026W	21 - YGR026W ... YGR026W biological process unknown molecular function unknown cellular component unknown | YGR027C	21	24	0.40741	0.46269	0.86364	0.50073	0.52082	0.46698	0.71758	0.999165	1.03312	0.877075	0.97878	0.993115	0.603775	0.621745	0.763155	0.535635	0.89333	0.22662
YDR005C	21 - YDR005C ... MAF1 negative regulation of transcr molecular function unknown nucleus | YDR006C	21	24	0.98163	0.66871	1.01228	1.01602	1.06855	0.92572	1.29048	1.38298	1.21766	0.906615	1.06375	1.4809	0.491145	0.602615	0.498245	0.481715	0.75218	0.7186
YHR002W	21 - YHR002W ... LEU5 coenzyme A transport coenzyme A transporter activity mitochondrial inner membrane | YHR003C	21	24	0.76606	0.60724	0.6772	0.84943	0.80112	1.11667	0.98964	1.04374	0.818635	1.34241	0.89626	0.961555	0.333375	0.446685	0.513125	0.642555	0.27884	0.7233
YPL164C	21 - YPL164C ... MLH3 meiotic recombination* molecular function unknown nucleus | YPL165C	21	24	0.89012	0.62649	0.68286	0.68295	0.79792	1.23466	1.18179	1.35057	1.15637	1.54967	1.06001	1.36427	0.572415	0.814195	0.531015	0.846895	0.35249	0.81575
YKL066W	21 - YKL066W ... | YKL067W	21	24	1.05595	0.59273	0.72526	0.85501	0.99331	0.46125	1.47346	1.20792	1.02178	1.44144	0.95157	1.41556	0.604805	0.448825	0.715675	0.646855	0.80014	0.60033
YIL166C	21 - YIL166C ... YIL166C transport transporter activity membrane | YIL169C	21	24	0.27638	0.53853	0.4658	0.78713	0.39483	0.76697	1.09275	1.16898	0.814755	1.42772	1.02019	1.16898	0.292695	0.748695	0.508215	0.717835	0.64511	0.70268
YHR132W-A	21 - YHR132W-A ... YHR132W-A biological process unknown molecular function unknown cytoplasm* | YHR133C	21	24	1.0886	0.86518	0.71255	1.08034	1.09007	1.1454	1.02872	0.595815	0.901985	0.880315	1.10967	1.11469	0.779015	0.586905	0.365935	0.592205	0.53417	0.42921
YPL257W	21 - YPL257W ... YPL257W biological process unknown molecular function unknown cellular component unknown | YPL258C	21	24	0.45413	0.75427	0.56057	0.4814	0.89776	0.68789	1.19908	1.25147	1.03289	1.56993	1.07673	1.25242	0.365975	1.21229	0.767675	-0.061385	0.72581	0.52878
YER181C	21 - YER181C ... | YER182W	21	24	0.4819	0.96468	0.44864	0.81987	0.41962	0.59196	0.84232	0.988965	0.920825	1.29968	0.44507	1.36989	0.371735	0.461685	0.446455	0.700275	0.41346	0.32465
YGR044C	21 - YGR044C ... RME1 meiosis* specific transcriptional repressor nucleus | YGR045C	21	24	1.25813	0.82729	0.9101	0.64752	1.11399	1.21531	1.21686	1.10667	0.554105	1.3653	0.86134	0.945785	0.316705	0.289555	0.218125	0.804785	0.46655	0.56874
YIL028W	21 - YIL028W | YIL029C	21	24	1.10502	0.92675	0.54299	0.85253	1.31642	1.40193	1.62146	1.03598	0.719695	1.06364	0.81759	1.12233	0.081685	0.400745	0.201245	0.373545	0.43017	1.00227
YBR005W	21 - YBR005W ... RCR1 cell wall organization and bio molecular function unknown integral to endoplasmic reticulum m | YBR006W	21	24	0.52281	0.13355	0.80674	0.81248	0.82375	0.63475	0.60375	1.28737	0.914255	1.05235	1.13225	1.15353	0.243095	0.369605	0.240455	0.180745	0.55724	0.34642
YDL018C	21 - YDL018C ... ERP3 secretory pathway molecular function unknown integral to membrane | YDL019C	21	24	0.72492	0.37722	0.41484	0.83314	0.27803	0.68726	0.88933	1.21681	0.811685	1.04829	0.9172	0.978085	0.388725	0.395415	0.161055	0.322805	0.51253	0.23981
YFL054C	21 - YFL054C ... YFL054C water transport transporter activity* integral to membrane | YFL055W	21	24	0.77278	1.00176	0.83049	0.61348	1.25368	0.96914	1.27419	1.35122	1.3154	1.47236	1.27548	1.26578	0.235985	0.555985	0.231525	0.605955	0.47714	0.60553
YJL213W	21 - YJL213W ... YJL213W biological process unknown molecular function unknown cellular component unknown | YJL214W	21	24	0.8328	1.20339	1.09764	0.97285	1.34314	1.19823	1.16689	1.58427	0.723335	1.47755	1.25024	1.51421	0.317195	0.561735	0.644055	0.254275	0.55631	0.52947
YOR015W	21 - YOR015W ... | YOR016C	21	24	0.82814	1.06859	1.31959	0.79327	1.2468	0.98753	1.33698	0.731795	1.27744	1.0943	1.42242	1.27808	0.739195	0.356595	0.671655	0.564305	0.21454	0.71764
YMR281W	21 - YMR281W ... GPI12 GPI anchor biosynthesis N-acetylglucosaminylphosphatidylinoendoplasmic reticulum membrane | YMR282C	21	24	1.06804	1.15572	1.12387	1.09586	1.07317	0.88716	1.53107	1.19799	1.23473	1.49389	1.50792	1.20399	0.498805	0.471515	0.566715	0.687825	0.56067	0.28483
YNL100W	21 - YNL100W ˜ AIM37 biological process unknown molecular function unknown | Putative protein of unknown function; non-tagged protein is detected in purified mitochondria; null mutant is viable and displays reduced respiratory growth and reduced frequency of mitochondrial genome losYNL101W	21	24	1.18274	0.74504	1.36788	1.19108	0.87477	1.07949	1.21677	1.40965	1.23606	1.354	1.26308	1.14105	0.321095	0.220015	0.510895	0.323225	0.49534	0.28138
YOL113W	21 - YOL113W ... SKM1 protein amino acid phosphoryla protein serine/threonine kinase actcellular component unknown | YOL114C	21	24	1.02766	0.92501	0.90262	1.00333	0.64859	1.18015	0.92804	1.12709	1.13977	1.29829	1.11439	1.14806	0.184675	0.615665	0.445685	0.209565	0.38292	0.8078
YLR266C	21 - YLR266C ... PDR8 response to stress* DNA binding* nucleus | YLR267W	21	24	0.89047	0.79731	0.91584	1.05002	0.95978	1.03155	1.13851	1.59424	1.11078	0.787255	0.91096	1.28868	0.103185	0.572575	0.104865	0.228215	0.3887	0.31926
YNL334C	21 - YNL334C ... SNO2 thiamin biosynthesis* molecular function unknown cellular component unknown | YNL335W	21	24	0.72299	0.82236	0.7567	0.6762	0.52434	1.08446	0.97508	0.895645	0.953275	0.946335	0.83273	1.02719	0.384765	0.435105	0.065075	0.558015	-0.10668	0.64502
YJL094C	21 - YJL094C ... KHA1 monovalent inorganic cation tr potassium:hydrogen antiporter activmitochondrion* | YJL095W	21	24	0.62213	0.80723	0.91684	1.11192	0.57506	0.54502	1.22954	1.24155	1.14044	1.18189	1.22447	1.29797	0.337155	0.629235	0.514385	-0.044695	0.69361	0.85606
YJR085C	21 - YJR085C ... YJR085C biological process unknown molecular function unknown mitochondrion | YJR086W	21	24	0.64214	0.52818	1.02065	0.70581	0.90068	0.59458	1.11325	0.888485	1.18792	1.13096	1.23371	0.968065	0.417935	0.071865	0.697365	0.621655	0.6456	0.11233
YOR180C	21 - YOR180C ... DCI1 fatty acid beta-oxidation dodecenoyl-CoA delta-isomerase actiperoxisomal matrix | YOR181W	21	24	0.75022	0.42166	0.48576	0.63467	0.87559	0.99306	0.84464	1.23507	0.823485	1.0272	0.79386	0.695505	0.226195	0.571475	0.201095	0.281925	0.08439	0.79012
YKL141W	21 - YKL141W ... SDH3 tricarboxylic acid cycle* succinate dehydrogenase (ubiquinonerespiratory chain complex II (sensu | YKL142W	21	24	0.83465	0.64251	0.63543	0.93305	0.4939	0.58462	1.13886	1.34552	1.06814	0.660485	0.95108	0.988195	0.164685	-0.024425	0.216525	0.543945	0.58129	0.0401
YGL183C	21 - YGL183C ... MND1 meiotic recombination protein binding* condensed nuclear chromosome | YGL184C	21	24	0.63149	0.90324	0.94472	0.83993	0.74349	0.88008	0.65427	1.02032	1.19439	1.47168	0.91393	1.68423	1.19914	0.678065	0.529985	0.361815	0.52142	0.53127
YLR001C	21 - YLR001C iESR cluster YLR001C biological process unknown molecular function unknown mitochondrion* | YLR002C	21	24	1.17453	1.03246	1.14154	1.13774	0.97937	1.20905	1.2301	1.5492	1.42077	1.37607	1.24842	1.23655	0.491845	0.685645	0.716535	0.393135	0.64414	0.69332
YGR289C	21 - YGR289C ... MAL11 alpha-glucoside transport* alpha-glucoside:hydrogen symporter membrane fraction | YGR290W	21	24	0.75661	0.94226	0.7178	0.94306	1.15935	1.40731	1.31892	1.54103	0.949485	1.80438	1.0832	1.08533	0.468385	0.967485	0.330875	0.614925	0.66908	1.01654
YIL108W	43 - YIL108W ... YIL108W proteolysis and peptidolysis metalloendopeptidase activity cytoplasm | YIL109C	43	25	2.04582	1.84375	2.13862	1.98863	2.11838	1.70952	1.34955	1.37576	1.49226	1.04075	1.21203	1.34733	1.11346	1.12502	1.30947	0.999735	1.19089	1.32316
YBR018C	43 - YBR018C ... GAL7 galactose metabolism UTP-hexose-1-phosphate uridylyltrancytoplasm | YBR019C	43	25	1.43022	1.94447	1.63517	1.91812	2.01717	1.84131	1.43758	1.42454	1.61511	1.65133	1.32035	2.16687	0.794685	1.11054	0.743865	1.24273	0.80304	0.79925
YIL045W	43 - YIL045W iESR cluster PIG2 biological process unknown protein phosphatase regulator activcytoplasm | YIL046W	43	25	1.91175	1.93938	2.00765	1.89794	1.89982	2.71887	1.85188	2.13523	2.01245	2.41548	1.82589	2.47379	0.480165	0.930555	0.521965	0.788845	0.6536	1.12188
YPR061C	43 - YPR061C ... JID1 biological process unknown molecular function unknown mitochondrion | YPR062W	43	25	2.10501	1.80476	1.90145	1.70015	1.99268	2.28091	1.94425	1.88597	1.81428	2.26916	1.63715	1.80922	0.651275	0.929725	1.00599	1.13887	0.70404	0.99182
YDR540C	43 - YDR540C ˜ IRC4 biological process unknown molecular function unknown | Putative protein of unknown function; null mutant displays increased levels of spontaneous Rad52p foci; green fluorescent protein (GFP)-fusion protein localizes to the cytoplasm and nucleusYDR541C	43	25	2.35263	2.41225	2.07538	2.27747	1.65041	2.48956	1.48875	1.56625	1.96535	2.35568	1.58404	2.45303	1.10359	1.25358	1.01562	1.03126	0.88177	1.19007
YPL248C	43 - YPL248C ... GAL4 regulation of transcription, D transcriptional activator activity nucleus | YPL249C	43	25	1.89661	1.9306	1.83119	1.71907	1.4968	1.91835	1.39524	1.39861	1.25453	1.72479	1.24553	1.39681	1.17742	1.3604	1.25709	1.5533	1.36635	1.69046
YER065C	43 - YER065C ... ICL1 glyoxylate cycle isocitrate lyase activity cellular component unknown | YER066C-A	43	25	2.0981	1.86094	1.84103	1.81345	1.99094	1.84812	1.50165	1.68969	1.4667	1.65688	1.19481	1.43392	0.885365	1.29421	0.915855	0.933725	0.90407	1.34491
YNR034W	43 - YNR034W ... SOL1 tRNA-nucleus export* molecular function unknown* cytoplasm* | YNR034W-A	43	25	2.15027	2.09821	2.12655	1.99954	2.4568	2.23566	1.8918	2.12248	1.62454	1.65985	1.51387	1.70747	1.0696	1.11193	1.37207	1.10641	1.35953	1.35223
YOL032W	43 - YOL032W ˜ OPI10 biological process unknown molecular function unknown | Protein with a possible role in phospholipid biosynthesis, based on inositol-excreting phenotype of the null mutant and its suppression by exogenous cholineYOL033W	43	25	1.91243	1.80709	2.37692	2.45178	1.92222	2.32805	1.75096	1.35301	1.92976	2.03224	1.61542	2.0625	0.623985	1.19887	0.963215	1.03137	1.06072	1.29581
YDR031W	43 - YDR031W ˜ MIC14 biological process unknown molecular function unknown | Mitochondrial intermembrane space cysteine motif protein of 14 kDaYDR032C	43	25	1.82209	1.58758	1.52161	1.73378	1.47689	1.59645	1.70843	1.35017	1.915	1.87874	2.32667	1.55987	0.862845	0.484215	1.04222	0.891015	0.83001	1.10571
YDR479C	43 - YDR479C ... PEX29 peroxisome organization and bi molecular function unknown peroxisomal membrane | YDR480W	43	25	1.60355	1.56849	1.78134	1.74429	1.92552	1.88812	1.63775	2.18642	1.77764	1.7432	1.80608	1.92789	1.16359	1.48918	1.47196	1.18378	1.52752	1.60841
YGL248W	43 - YGL248W iESR cluster PDE1 cAMP-mediated signaling cAMP-specific phosphodiesterase actcellular component unknown | YGL249W	43	25	1.86921	1.41535	1.83241	1.51037	1.64554	1.67419	1.94918	1.78611	1.44274	2.16276	1.65091	1.64203	1.15681	1.10712	1.26924	1.04398	1.03592	1.4449
YCR079W	43 - YCR079W ˜ PTC6 biological process unknown phosphoprotein phosphatase act | Mitochondrial protein phosphatase of type 2C with similarity to mammalian PP1Ks; involved in mitophagy; null mutant is sensitive to rapamycin and has decreased phosphorylation of the Pda1 subunit of pyruvate dehydrogenaseYCR081W	43	25	1.67299	1.66074	2.00535	1.81008	1.87867	1.60407	1.88532	2.11083	1.97803	1.72701	1.85845	1.73866	0.927585	1.16579	1.39949	1.05824	1.45357	1.74144
YDR503C	43 - YDR503C ... LPP1 phospholipid metabolism phosphatidate phosphatase activity membrane | YDR504C	43	25	1.7754	1.52993	1.55362	1.74828	1.74639	1.70253	1.70016	1.6361	1.45381	1.57018	1.49242	1.48934	1.27727	1.21569	1.3057	1.36725	1.25955	1.58242
YGR288W	43 - YGR288W ... MAL13 regulation of transcription, D transcription factor activity nucleus | YGR289C	43	25	1.51489	1.67932	1.90059	1.76249	1.67886	1.62301	1.82797	1.52442	1.67077	1.35223	1.44143	1.501	1.23466	1.35513	1.30743	1.16057	1.38314	1.42886
YIL135C	43 - YIL135C ... VHS2 G1/S transition of mitotic cel molecular function unknown cytoplasm | YIL136W	43	25	1.70605	1.68432	1.71634	1.71539	1.59362	1.47122	1.42469	1.74269	1.7596	1.71962	1.5921	1.8856	1.39263	1.15182	1.48124	1.10749	1.2261	1.46222
YOL053W	43 - YOL053W ˜ AIM39 biological process unknown molecular function unknown | Putative protein of unknown function; null mutant displays elevated frequency of mitochondrial genome lossYOL054W	43	25	1.74319	1.94672	1.66974	1.9495	1.49385	1.59971	1.73574	1.88234	1.87207	1.59648	1.93864	1.82164	1.37645	1.35414	1.42498	1.24035	1.51135	1.64119
YIL077C	43 - YIL077C ... YIL077C biological process unknown molecular function unknown mitochondrion | YIL078W	43	25	1.7841	1.56928	1.50434	1.47266	1.86988	1.55075	1.69557	1.74745	1.51395	1.82454	1.59063	1.83449	1.16972	1.12292	1.33712	1.1382	1.53388	1.73025
YDL025C	43 - YDL025C ... YDL025C biological process unknown protein kinase activity cellular component unknown | YDL026W	43	25	1.58007	1.7352	1.78727	1.82801	1.61466	1.64322	2.05796	1.96731	2.03485	2.1243	2.12514	2.04113	1.0066	0.868875	1.148	0.909825	1.01968	0.99659
YBR186W	43 - YBR186W ... PCH2 regulation of meiosis molecular function unknown nucleolus | YBR187W	43	25	1.30027	1.38259	1.47107	1.74015	1.65014	1.89632	1.56049	2.06487	1.65577	1.89728	1.50967	2.28613	1.13506	1.18227	0.856995	1.13548	1.1226	0.82086
YAL034C	43 - YAL034C ... FUN19 biological process unknown molecular function unknown cellular component unknown | YAL034W-A	43	25	1.74808	1.75075	1.98369	1.88903	1.92441	1.77508	2.19029	2.03482	1.64223	1.92552	1.72109	2.19909	0.833055	0.886755	1.52405	1.4947	1.12185	1.69305
YMR103C	43 - YMR103C ... | YMR104C	43	25	1.71501	1.38121	1.50708	1.64639	1.77374	1.90684	2.03483	2.26816	1.86556	1.99873	2.17132	1.93521	0.578375	0.929695	1.19965	1.15176	1.015	1.30318
YML131W	43 - YML131W iESR cluster YML131W biological process unknown molecular function unknown cytoplasm | YML132W	43	25	1.49756	1.73512	1.51699	1.86904	2.04623	1.73145	2.00099	1.80065	1.79757	1.85099	1.94932	2.00804	0.847095	0.991565	1.30963	1.34468	1.45953	2.05652
YNL144C	43 - YNL144C ... YNL144C biological process unknown molecular function unknown mitochondrion | YNL145W	43	25	1.21637	1.82171	1.46554	1.44131	1.37544	1.63851	2.19684	2.20585	1.53748	2.16979	1.60533	1.83499	0.880045	0.862855	0.822005	1.21643	0.86652	1.32868
YDR525W-A	43 - YDR525W-A ... SNA2 biological process unknown molecular function unknown cytoplasm* | YDR526C	43	25	1.65607	1.87865	1.73774	1.79099	1.83896	1.24879	1.6404	1.11702	1.83567	1.45504	2.00292	1.56578	1.19118	0.936205	1.08926	1.33488	1.2133	1.39905
YKL189W	43 - YKL189W ... HYM1 cellular morphogenesis during transcriptional repressor activity intracellular* | YKL190W	43	25	1.98699	1.56374	1.5019	1.69794	1.59383	1.8506	1.52722	2.12121	1.38811	1.61441	1.17975	1.57971	0.752605	1.16952	1.06149	1.00571	1.52411	1.29017
YOL031C	43 - YOL031C ... SIL1 SRP-dependent cotranslational molecular function unknown endoplasmic reticulum | YOL032W	43	25	2.3034	2.22272	2.23517	2.43126	2.09636	2.10101	1.48952	1.74551	1.82706	1.68183	1.45153	1.7165	1.50828	1.65352	1.88684	1.48108	1.52899	1.74812
YLL023C	43 - YLL023C ... YLL023C biological process unknown molecular function unknown endoplasmic reticulum | YLL024C	43	25	1.70692	1.77665	1.82144	1.74895	1.93265	1.60469	2.23091	1.96294	2.18117	2.19297	2.5058	2.26404	1.14881	1.01076	1.22671	1.34549	1.25631	1.62693
YIL055C	43 - YIL055C ... YIL055C biological process unknown molecular function unknown cellular component unknown | YIL056W	43	25	2.03284	2.15175	1.94189	1.97134	1.62954	2.23026	1.89896	1.66234	2.2974	1.91939	1.98352	1.63664	1.73823	1.58197	1.26917	1.452	1.52339	1.57132
YPR079W	43 - YPR079W ... MRL1 vacuolar transport signal sequence binding cytoplasm* | YPR080W	43	25	2.031	1.94176	2.11311	2.03612	2.2464	1.99831	1.9722	1.75815	1.95164	1.91959	2.0552	1.95761	1.37835	1.50326	1.69514	1.06889	1.62685	1.45243
YDL246C	43 - YDL246C ... SOR2 hexose metabolism "oxidoreductase activity, acting on"cellular component unknown | YDL247W	43	25	1.76437	2.27727	2.00586	1.98946	1.89601	2.01468	1.94128	1.8903	1.82957	2.29569	1.70883	2.36068	1.14301	1.54009	1.26605	1.61949	1.18324	1.46694
YMR085W	43 - YMR085W ... YMR085W biological process unknown molecular function unknown cellular component unknown | YMR086C-A	43	25	1.95212	1.95425	1.78327	1.75916	1.93465	2.01304	1.91646	1.88804	1.47744	2.10907	1.50242	1.86767	1.1003	1.58588	1.41495	1.82391	1.11638	1.48796
YMR262W	43 - YMR262W ... YMR262W biological process unknown molecular function unknown cellular component unknown | YMR263W	43	25	2.1533	1.7412	2.07792	1.96308	2.30996	1.80839	2.20441	1.9873	2.02897	1.5872	1.8536	2.06386	1.2991	1.10004	1.31754	0.706675	1.30394	1.86977
YML120C	43 - YML120C ... NDI1 mitochondrial electron transpo "oxidoreductase activity, acting on"mitochondrial inner membrane | YML121W	43	25	1.73853	1.52846	2.0788	1.82954	1.77405	1.74252	2.1899	2.55491	1.91248	2.08245	2.08301	2.54829	0.932915	1.00307	1.19348	1.29282	1.07556	1.11989
YLR290C	48 - YLR290C iESR cluster YLR290C biological process unknown molecular function unknown mitochondrion | YLR291C	48	25	1.67985	1.38394	1.65321	1.6169	1.39555	1.69973	1.05354	1.11579	1.02076	1.26154	1.26845	1.17148	1.28717	1.41047	1.35953	1.29058	1.1808	1.37462
YNL007C	48 - YNL007C ... SIS1 protein folding* unfolded protein binding* cytosolic small ribosomal subunit ( | YNL008C	48	25	1.82597	1.71597	1.76021	1.62827	1.57348	1.60781	1.43328	0.860475	1.72393	1.13393	1.35034	1.62542	0.808475	0.833415	1.20989	0.831065	0.78841	1.225
YFR042W	48 - YFR042W ˜ KEG1 biological process unknown molecular function unknown | Integral membrane protein of the ER; physically interacts with Kre6p; has a role in the synthesis of beta-1,6-glucan in the cell wall; required for cell viabilityYFR043C	48	25	1.65105	1.66509	1.87088	2.01802	1.65521	1.21936	1.02996	1.32522	1.55113	1.41814	1.34251	1.46408	0.823205	1.09651	1.01989	1.0893	1.17124	1.25114
YER020W	48 - YER020W ... GPA2 sporulation (sensu Fungi)* GTPase activity mitochondrion | YER021W	48	25	1.50013	1.39766	1.40937	1.02878	1.34625	1.42031	1.0881	1.17884	1.39193	1.20059	1.24875	1.22037	1.23683	0.906625	1.13526	0.601935	0.95503	0.98099
YKL206C	48 - YKL206C ˜ ADD66 biological process unknown molecular function unknown | Protein involved in 20S proteasome assembly; forms a heterodimer with Pba1p that binds to proteasome precursors; similar to human PAC2 constituent of the PAC1-PAC2 complex involved in proteasome assemblyYKL207W	48	25	1.58833	1.25687	1.46753	1.57965	1.36346	1.46268	1.27436	1.16587	1.05777	1.19927	1.06899	1.17741	0.967165	1.00188	1.49076	0.962155	1.15266	1.35371
YOL060C	48 - YOL060C ... MAM3 mitochondrion organization and molecular function unknown vacuolar membrane (sensu Fungi) | YOL061W	48	25	1.39118	1.47702	1.64153	1.34221	1.43578	1.39775	1.37248	0.984605	1.34549	1.12011	1.28991	1.38902	1.0251	0.713115	1.13321	0.982015	1.20243	1.04115
YDL142C	48 - YDL142C ... CRD1 mitochondrial membrane organiz cardiolipin synthase activity mitochondrial membrane | YDL143W	48	25	1.36754	1.33163	1.45962	1.64636	1.36871	1.31853	1.18203	1.48741	0.921505	1.40156	1.29714	1.36282	0.665855	0.912895	0.863395	0.737685	1.13838	1.02544
YOR097C	48 - YOR097C ... YOR097C biological process unknown molecular function unknown cellular component unknown | YOR098C	48	25	1.28502	1.17069	1.6688	1.12143	1.21659	1.3854	1.62927	1.58123	1.47673	1.68325	1.57266	1.38438	1.10787	0.987385	0.912655	0.750645	0.83005	1.03415
YKL034W	48 - YKL034W ... TUL1 protein ubiquitination* ubiquitin-protein ligase activity Golgi apparatus | YKL035W	48	25	1.15551	1.37333	1.53879	1.43071	1.43855	1.11581	1.6333	1.54907	1.62139	1.6518	1.55491	1.55574	0.733585	0.946125	0.965145	1.03611	0.93423	0.99723
YLL019C	48 - YLL019C iESR cluster KNS1 protein amino acid phosphoryla protein serine/threonine kinase actcellular component unknown | YLL020C	48	25	1.41247	1.33696	1.46567	1.16137	1.44184	1.28838	1.76864	1.59054	1.55794	1.52636	1.55703	1.43559	0.982155	0.845745	1.13342	1.00375	1.0432	1.25804
YHR198C	48 - YHR198C ˜ AIM18 biological process unknown molecular function unknown mitochondrion | Putative protein of unknown function; the authentic, non-tagged protein is detected in highly purified mitochondria in high-throughput studies; null mutant displays elevated frequency of mitochondrial genome lossYHR199C	48	25	1.30641	1.4482	1.50264	1.57179	1.80732	1.776	1.70534	1.86506	1.56089	1.55309	1.67442	1.58547	0.769225	1.01919	0.907875	0.849685	1.15639	1.05049
YGR028W	48 - YGR028W ... MSP1 protein-mitochondrial targetin ATPase activity mitochondrial outer membrane | YGR029W	48	25	1.70428	1.51832	1.50932	1.66629	1.52188	1.58881	1.38425	1.37509	1.30764	1.18229	1.2989	1.29906	1.04371	1.10739	1.16796	0.940135	1.21133	1.21012
YJL102W	48 - YJL102W ... MEF2 translational elongation translation elongation factor activmitochondrion | YJL103C	48	25	1.32635	1.10242	1.21909	1.39473	1.27254	1.55148	1.3972	1.64958	1.47619	1.50187	1.48294	1.41143	1.00104	1.16914	0.919415	0.908245	1.01685	1.23605
YJL091C	48 - YJL091C ... GWT1 GPI anchor biosynthesis molecular function unknown membrane* | YJL092W	48	25	1.46035	1.73614	1.85738	1.8265	1.43595	1.4423	1.48759	1.66158	1.80845	1.52826	1.43894	1.6082	0.654145	0.852185	0.816445	0.872595	1.11713	0.98653
YPR042C	48 - YPR042C ... PUF2 mRNA catabolism, deadenylylati mRNA binding cytoplasm | YPR043W	48	25	1.59853	1.49649	1.66881	1.74562	1.43604	1.50398	1.36039	1.75443	1.51442	1.59953	1.4416	1.26399	0.732425	0.770725	0.764905	0.781485	1.00453	1.01906
YER035W	48 - YER035W iESR cluster EDC2 deadenylylation-dependent deca RNA binding cytoplasm* | YER036C	48	25	1.6414	1.50757	1.88569	1.68965	1.55514	1.50832	1.54607	1.19748	1.19348	1.54635	1.69671	1.51138	0.804315	0.603985	0.868215	0.614355	0.82461	1.2223
YER141W	48 - YER141W iESR cluster COX15 cytochrome c oxidase complex a "oxidoreductase activity, acting on"mitochondrial inner membrane | YER142C	48	25	1.50232	1.30364	1.42404	1.56786	1.55163	1.15961	1.49561	1.73718	1.6641	1.07658	1.62383	1.42295	0.694205	0.971185	0.894615	0.550275	0.94595	1.05351
YNL214W	48 - YNL214W ... PEX17 peroxisome organization and bi protein binding peroxisomal membrane | YNL215W	48	25	1.43508	1.12613	1.19924	1.39015	1.54788	1.35342	0.90248	1.45215	1.525	1.82902	1.48333	1.55015	0.654075	1.09632	0.871425	0.823515	0.7586	1.06352
YHR189W	48 - YHR189W ... PTH1 protein biosynthesis aminoacyl-tRNA hydrolase activity mitochondrion | YHR190W	48	25	1.35921	1.1157	1.59545	1.45195	1.98051	1.53203	1.30045	1.34788	1.46944	1.27056	1.44584	1.60923	1.08428	0.899075	0.938065	0.977165	1.0312	1.45689
YDR231C	48 - YDR231C ... COX20 aerobic respiration* unfolded protein binding mitochondrial inner membrane | YDR232W	48	25	1.5196	1.3003	1.98718	1.56251	1.74172	1.13611	1.35817	1.50362	1.44972	1.50528	1.58685	1.46206	1.19796	0.958315	1.12399	1.13369	1.1582	1.26713
YJL053W	48 - YJL053W ... PEP8 protein-Golgi retention* molecular function unknown endosome* | YJL054W	48	25	1.75573	1.49068	1.77461	1.42059	1.50088	1.48323	1.68358	1.37403	1.39033	1.36509	1.54663	1.42654	0.738725	1.01619	1.19375	0.691475	0.91095	0.89268
YLR137W	48 - YLR137W ... YLR137W biological process unknown molecular function unknown cellular component unknown | YLR138W	48	25	1.40634	1.09334	1.33765	1.53746	1.57893	1.35877	1.28549	1.40465	1.15475	1.38372	1.33397	1.44918	0.882185	1.07347	1.1162	0.304675	1.15935	1.18667
YLL020C	48 - YLL020C iESR cluster | YLL021W	48	25	1.34568	1.34908	1.3219	1.41469	1.6949	1.77303	1.82398	1.32831	1.4684	1.34286	1.52001	1.4223	0.582585	1.02636	1.18132	1.05295	0.67062	0.64316
YBR024W	48 - YBR024W ... SCO2 copper ion transport thioredoxin peroxidase activity mitochondrial membrane | YBR025C	48	25	1.62875	1.36681	1.72955	1.50937	1.46519	1.74197	1.6956	1.68741	1.63148	1.69467	2.0071	1.43861	1.0597	1.3457	1.09001	0.984925	1.27954	0.93232
YIR043C	#N/A	46	25	2.47329	2.79507	2.27682	2.84715	2.48301	2.46497	2.69231	2.63228	2.91931	2.36658	2.19798	2.84598	1.03007	1.42427	1.80231	0.731195	1.55685	1.45115
YJL144W	46 - YJL144W iESR cluster YJL144W response to dessication molecular function unknown cytoplasm | YJL145W	46	25	3.24382	3.21746	3.60132	3.8647	2.47979	2.64259	2.35277	2.67558	2.75047	3.4575	2.76295	3.29009	1.14028	1.17875	1.02597	1.84875	1.61437	2.06098
YMR020W	46 - YMR020W ... FMS1 pantothenate biosynthesis* amine oxidase activity cytoplasm | YMR021C	46	25	3.62359	3.19926	3.87625	3.67241	3.67573	3.46505	2.8048	3.12106	3.27	2.77127	2.82958	2.94161	1.59092	1.97358	1.93694	1.77835	1.74332	1.86145
YPR154W	46 - YPR154W ... PIN3 actin cytoskeleton organizatio molecular function unknown cytoplasm* | YPR155C	46	25	3.29329	3.29707	3.6948	3.91391	3.82184	3.21736	2.72216	2.33283	2.27123	3.11008	3.04979	3.08155	1.74263	1.89565	2.28073	1.88885	2.13557	2.58399
YIL053W	46 - YIL053W ... RHR2 response to osmotic stress* glycerol-1-phosphatase activity cytoplasm* | YIL054W	46	25	2.44717	1.9353	2.68709	2.22345	3.01741	2.21508	1.76868	1.56254	1.5009	1.56008	2.04191	1.42231	2.41348	2.28349	2.55531	1.98903	2.43654	2.1856
YIL111W	46 - YIL111W ... COX5B mitochondrial electron transpo cytochrome-c oxidase activity respiratory chain complex IV (sensu | YIL112W	46	25	2.89446	3.04611	3.27785	2.80358	3.14475	2.93594	2.6132	2.38623	2.81616	3.12669	2.52603	2.5844	1.84004	1.78974	1.84682	1.77293	1.75254	2.52044
YGR066C	46 - YGR066C ... YGR066C biological process unknown molecular function unknown cellular component unknown | YGR067C	46	25	2.49988	2.87867	2.39146	2.55288	2.90577	2.85868	2.67901	2.77799	2.3713	2.93354	2.27562	2.81514	1.25513	1.46771	1.86071	2.36135	1.57346	1.38326
YGR087C	46 - YGR087C ... PDC6 ethanol metabolism pyruvate decarboxylase activity cytoplasm | YGR088W	46	25	2.51636	2.88675	2.47536	2.22794	2.23295	2.53123	2.41724	2.85888	2.47188	2.42157	2.07417	2.64596	1.79933	2.27707	1.69659	2.04025	1.62835	2.12806
YBL091C-A	46 - YBL091C-A ... SCS22 biological process unknown* molecular function unknown cellular component unknown | YBL092W	46	25	2.62627	2.22049	2.45975	2.32839	2.94915	2.467	2.65084	2.18622	2.73544	2.42738	2.53928	2.32172	2.18256	1.8312	2.11449	1.74476	2.23281	2.17549
YBL075C	46 - YBL075C iESR cluster SSA3 response to stress* ATPase activity cytosol | YBL076C	46	25	2.6102	2.4236	2.66404	2.68693	2.61242	2.56564	2.61549	3.00165	2.59387	2.54304	2.31941	2.58342	1.96	2.19659	2.427	2.25182	2.34609	2.52696
YJL066C	46 - YJL066C iESR cluster MPM1 biological process unknown molecular function unknown mitochondrion* | YJL067W	46	25	2.77501	2.17298	2.66598	2.3723	2.51871	2.65616	2.46021	2.35019	2.21956	2.21229	2.37854	2.5766	2.15016	1.68918	2.32179	1.68223	2.15665	2.02843
YGL259W	46 - YGL259W ... YPS5 biological process unknown aspartic-type endopeptidase activitcellular component unknown | YGL260W	46	25	2.88269	2.79483	2.52065	2.96925	3.04357	3.66179	2.69164	2.74161	2.54951	3.18585	2.45633	2.44861	1.55998	2.44074	1.98735	2.26623	2.15255	2.30976
YJR008W	46 - YJR008W iESR cluster YJR008W biological process unknown molecular function unknown cytoplasm* | YJR009C	46	25	2.5379	2.4376	2.61334	2.3888	2.70046	2.94625	2.55295	2.36363	2.03326	3.04001	2.23573	2.62891	1.5901	1.83764	1.88272	1.74354	1.63649	1.84882
YML130C	46 - YML130C ... ERO1 protein folding* electron carrier activity endoplasmic reticulum | YML131W	46	25	2.99024	3.04799	2.93778	3.26223	2.68344	3.02929	2.5014	2.18668	2.68717	2.60229	2.22741	2.62523	2.26593	2.70039	2.70763	2.19992	2.6987	2.65749
YDL146W	46 - YDL146W ˜ LDB17 biological process unknown molecular function unknown | Protein involved in the regulation of endocytosis; transiently recruited to actin cortical patches in a SLA1-dependent manner after late coat component assembly; GFP-fusion protein localizes to the periphery, cytoplasm, bud, and bud neckYDL147W	46	25	3.06919	3.07476	3.00834	3.44339	2.91571	3.13658	2.99512	3.3129	3.09001	2.97271	2.91568	2.87412	2.22973	2.5164	2.69075	2.11937	2.68175	2.75968
YJR161C	46 - YJR161C ... COS5 biological process unknown molecular function unknown vacuole (sensu Fungi) | YJR162C	46	25	2.26267	2.37156	2.55905	2.78528	2.6177	2.19707	2.00987	2.25698	2.57405	1.87719	1.89108	2.3071	0.851355	1.44409	1.32308	1.32776	1.61974	1.66644
YBR201W	46 - YBR201W ... DER1 ER-associated protein cataboli molecular function unknown endoplasmic reticulum membrane | YBR202W	46	25	2.38601	2.57656	2.40448	2.77095	1.94591	2.38736	2.13805	2.43718	2.41947	2.27045	1.91642	2.3503	1.38637	1.62492	1.85471	1.51663	1.60902	1.71682
YDR475C	46 - YDR475C ... JIP4 biological process unknown molecular function unknown cellular component unknown | YDR476C	46	25	2.71304	2.38796	2.57868	2.13413	2.58481	2.47198	2.00937	2.28275	2.11713	2.13623	1.90853	2.14668	1.59674	1.96273	1.61814	1.26422	1.70359	1.91079
YHR112C	46 - YHR112C iESR cluster YHR112C sulfur metabolism cystathionine beta-lyase activity cytoplasm | YHR113W	46	25	2.64122	2.30538	3.00468	2.51183	2.82773	2.48593	1.96968	1.89552	2.58745	2.04589	2.05825	2.11714	1.94947	2.04147	1.84434	1.65017	1.99125	2.11369
YOR054C	46 - YOR054C ... VHS3 G1/S transition of mitotic cel phosphopantothenoylcysteine decarbocellular component unknown | YOR055W	46	25	2.52102	2.44648	2.68766	2.35563	2.47592	2.65328	1.72022	1.6843	2.00502	2.07362	1.69419	1.92939	1.74141	1.82421	1.85401	1.20914	1.69371	1.75548
YMR107W	51 - YMR107W ... SPG4 biological process unknown molecular function unknown cellular component unknown | YMR108W	51	25	3.37215	3.83282	3.36354	3.47717	3.53642	3.86687	4.70397	5.13066	4.25955	4.81226	3.3852	5.32397	0.840875	2.25671	1.30262	2.09194	1.46743	1.83335
YBR054W	51 - YBR054W ... YRO2 biological process unknown molecular function unknown mitochondrion* | YBR055C	51	25	4.97035	4.70227	4.99738	4.87869	5.2444	5.05326	5.09281	4.95929	5.3861	3.73358	4.05247	4.54122	1.44697	1.7888	2.00359	3.69509	2.19302	2.60705
YER150W	51 - YER150W iESR cluster SPI1 biological process unknown molecular function unknown cell wall (sensu Fungi) | YER151C	51	25	5.53318	5.91127	5.93262	5.32498	5.25501	5.80203	4.46289	4.68325	4.17047	4.80046	3.6937	4.39839	1.53612	2.46616	2.92206	2.76398	2.61503	3.6189
YHR139C	51 - YHR139C ... SPS100 spore wall assembly (sensu Fun molecular function unknown spore wall (sensu Fungi) | YHR139C-A	51	25	4.09515	4.14832	3.48283	4.60583	4.07797	4.00441	5.46262	4.5374	5.26706	4.91922	4.76321	5.63971	1.20477	1.17544	0.798035	1.89491	1.0904	1.53944
YCR021C	51 - YCR021C ... HSP30 response to stress molecular function unknown plasma membrane | YCR022C	51	25	7.44233	6.7011	7.20525	7.64211	7.77352	6.51709	3.93345	3.98588	6.28585	2.01538	4.20083	3.19497	-1.60526	0.078885	1.39146	2.41418	0.64296	1.84008
YNL194C	51 - YNL194C iESR cluster YNL194C biological process unknown molecular function unknown cytoplasm* | YNL195C	51	25	5.16678	5.40786	4.89355	5.3685	5.63687	4.84785	6.41817	6.02083	6.13255	6.03845	5.59528	5.83434	2.26687	3.35674	3.59017	4.26403	3.76568	3.99771
YOR178C	51 - YOR178C ... GAC1 meiosis* protein phosphatase type 1 activityprotein phosphatase type 1 complex | YOR179C	51	25	5.35858	5.56867	5.46089	5.22245	5.46821	5.19745	5.85603	5.36846	5.42133	4.91162	4.73162	5.39149	3.3194	3.69299	4.14611	4.49406	4.52255	4.60575
YDL007C-A	19 - YDL007C-A YDL007C-A YDR119W-A	19	29	0.57855	0.43815	0.56588	0.33426	0.78702	-0.16735	1.96592	0.554905	1.35631	1.01134	1.607	1.41325	0.329605	-0.261225	0.880855	0.349245	0.42181	0.88994
YKL187C	19 - YKL187C ... YKL187C biological process unknown molecular function unknown mitochondrion | YKL188C	19	29	0.42343	0.60662	0.80182	0.57877	0.59848	0.91358	1.98919	2.11343	1.41631	2.2279	1.46709	1.80995	0.319305	0.735465	0.682985	0.775845	0.81906	0.89243
YPL102C	19 - YPL102C ... | YPL103C	19	29	0.15933	0.50258	0.5667	0.82248	0.02446	0.10928	1.39727	1.83275	0.302245	1.25642	1.08848	1.24721	-0.298195	0.235725	0.653605	0.121955	0.18321	0.8546
YJR108W	19 - YJR108W ... ABM1 microtubule cytoskeleton organ molecular function unknown cellular component unknown | YJR109C	19	29	0.72254	0.14312	0.4411	0.69212	0.89319	0.46259	1.61324	1.80175	1.50564	1.70202	1.24797	1.23639	0.113665	3.5e-05	-0.289595	0.742015	0.50711	0.53823
YAL049C	19 - YAL049C ˜ AIM2 biological process unknown molecular function unknown | Cytoplasmic protein involved in mitochondrial function or organization; null mutant displays reduced frequency of mitochondrial genome loss; potential Hsp82p interactorYAL051W	19	29	0.40611	0.49704	0.44321	0.62946	0.63607	0.31546	2.05834	2.11096	1.72575	1.71149	2.01062	1.83096	0.425055	0.537225	0.525415	0.454095	0.51642	0.79914
YGR069W	19 - YGR069W ... | YGR070W	19	29	1.66439	0.05941	1.30282	0.64607	1.05048	-0.43598	1.46858	1.27252	1.25189	1.40785	2.29539	2.19564	0.582225	0.676795	-0.038385	-0.086065	1.57103	0.1925
YLR171W	19 - YLR171W ... | YLR172C	19	29	0.19725	0.32836	1.2659	0.40883	0.28297	-0.12032	2.03364	1.2878	1.61515	1.13884	1.5892	0.996565	0.853105	-0.591195	1.43931	0.744955	0.92422	0.16513
YBR182C-A	19 - YBR182C-A ... YBR182C-A biological process unknown molecular function unknown cellular component unknown | YBR183W	19	29	-0.20099	0.48441	0.13637	0.02999	-0.28896	0.05032	1.76423	1.58935	1.80278	1.82912	1.7975	1.94364	0.365445	0.814085	0.416265	1.32022	0.4938	0.82986
YML054C-A	19 - YML054C-A ... YML054C-A biological process unknown molecular function unknown cellular component unknown | YML055W	19	29	0.57265	0.442	1.00755	0.34165	0.28141	0.6342	2.09492	1.59994	2.01207	1.61634	1.71243	1.22453	1.79523	0.261325	0.651855	1.08777	1.19875	0.71698
YGR067C	19 - YGR067C ... YGR067C biological process unknown molecular function unknown cellular component unknown | YGR068C	19	29	0.24342	0.76528	0.0064	0.17051	0.15062	-0.0207	1.82516	1.82126	1.74839	1.90705	1.3942	2.02915	0.391505	0.392015	0.758335	1.2852	0.76945	0.68085
YOR031W	19 - YOR031W ... CRS5 response to metal ion copper ion binding cytoplasm | YOR032C	19	29	0.68948	0.22308	0.62163	0.29006	1.0157	0.58256	2.26813	2.02671	2.06211	2.16726	2.12918	1.82923	0.296455	0.256115	0.441775	1.42336	0.81132	0.26274
YPR006C	19 - YPR006C ... ICL2 propionate metabolism* methylisocitrate lyase activity mitochondrial matrix | YPR007C	19	29	1.31867	0.66537	0.61178	0.20865	1.39418	-0.80781	1.502	1.81608	1.30025	1.27511	1.49981	1.9237	0.907515	1.03391	0.967875	1.7008	1.22024	1.14024
YBR105C	19 - YBR105C ... VID24 vesicle-mediated transport* molecular function unknown extrinsic to membrane* | YBR106W	19	29	0.29162	0.17114	-0.11772	0.43053	0.37828	-0.55978	1.50821	1.68183	1.49233	1.57665	1.69038	1.57804	0.208385	0.572925	0.131925	0.005885	0.20584	0.47446
YBR148W	19 - YBR148W ... YSW1 biological process unknown molecular function unknown cellular component unknown | YBR149W	19	29	0.05293	1.10484	-0.03463	0.55822	-0.04968	0.60031	1.17229	1.60715	1.57542	1.92396	1.44123	1.49811	0.979925	0.872215	0.615685	1.13783	0.50742	1.00173
YOR136W	19 - YOR136W ... IDH2 tricarboxylic acid cycle* isocitrate dehydrogenase (NAD+) actmitochondrion* | YOR137C	19	29	0.18829	0.08181	0.27401	0.26161	0.56948	0.41171	1.42415	1.74622	0.911075	1.74473	1.6814	1.41168	0.730465	0.775735	0.719275	1.16884	1.09494	0.49193
YGR281W	19 - YGR281W ... YOR1 transport* xenobiotic-transporting ATPase actiplasma membrane | YGR282C	19	29	-0.0376	0.15707	0.11472	0.22181	0.08776	-0.01399	1.24782	1.55106	1.33234	1.15385	1.25124	1.22534	0.683805	0.998025	0.943305	1.18653	1.22666	1.25378
YLR152C	19 - YLR152C iESR cluster YLR152C biological process unknown molecular function unknown cellular component unknown | YLR153C	19	29	0.02299	0.3003	0.28255	0.57485	0.62527	0.441	1.37398	1.48964	1.41643	1.09295	1.35919	1.35326	0.212985	0.333195	0.449095	0.352715	0.5263	0.652
YGR143W	19 - YGR143W ... SKN1 cell wall organization and bio glucosidase activity integral to membrane | YGR144W	19	29	0.57388	0.57016	0.54781	0.7034	0.46092	0.60201	1.47364	1.82174	1.30215	1.47263	1.15256	1.43345	0.258345	0.314325	0.601215	0.717505	0.60996	0.48642
YGL191W	19 - YGL191W ... COX13 aerobic respiration enzyme regulator activity* respiratory chain complex IV (sensu | YGL192W	19	29	0.6226	0.48102	0.60758	0.47573	0.83584	0.66228	1.28797	1.28469	1.36132	1.73348	1.52945	1.45108	0.416135	0.392645	0.615585	0.500675	0.49869	0.54187
YGR111W	19 - YGR111W ... YGR111W biological process unknown molecular function unknown cytoplasm* | YGR112W	19	29	0.54524	0.46253	0.63452	0.54746	0.38466	0.35439	1.34092	1.8579	1.16409	1.51053	1.40202	1.4142	0.469185	0.588995	0.385265	0.350895	0.53083	0.42408
YGL237C	19 - YGL237C ... HAP2 transcription* transcriptional activator activity nucleus* | YGL238W	19	29	0.29999	0.35319	0.50794	0.20759	0.49025	0.63995	1.60896	1.56187	1.25852	1.53331	1.22785	1.40119	0.238385	0.451025	0.637405	0.455745	0.4305	0.62362
YPR172W	19 - YPR172W ... YPR172W biological process unknown molecular function unknown cytoplasm* | YPR173C	19	29	0.71689	0.3226	0.28896	0.32694	0.9727	0.28503	1.52464	1.06828	0.751185	1.38006	1.33572	1.14149	0.413735	0.607165	0.855625	0.482825	0.57743	0.62227
YGR018C	19 - YGR018C ... | YGR019W	19	29	0.01118	0.4686	0.83867	0.68536	0.33082	0.54808	1.02662	1.44189	1.11502	1.1247	1.03033	1.5593	0.278345	0.817685	0.494235	1.03509	1.00343	0.31324
YKL221W	19 - YKL221W ... MCH2 transport transporter activity* membrane | YKL222C	19	29	0.28094	0.71506	0.29213	0.59498	0.5567	0.26432	1.24764	1.46615	0.920135	1.47314	1.17226	1.23476	0.592135	0.386885	0.734745	0.183935	0.46517	-0.03369
YLR070C	19 - YLR070C ... XYL2 monosaccharide metabolism D-xylulose reductase activity cellular component unknown | YLR071C	19	29	0.1072	0.04655	0.09306	0.30022	0.31304	0.70906	1.24789	0.769425	0.927045	1.70013	0.93241	1.49751	0.721455	0.711775	0.756075	0.526095	0.56045	0.68714
YER088C	19 - YER088C ... DOT6 regulation of transcription fr molecular function unknown cytoplasm* | YER089C	19	29	0.50907	0.53102	0.76599	0.33031	0.41676	-0.06402	1.39842	1.07542	1.21761	0.924865	1.28645	1.0097	0.693645	0.426285	1.02275	0.863445	1.10101	1.22878
YOR351C	19 - YOR351C ... MEK1 protein amino acid phosphoryla protein serine/threonine kinase actnucleus | YOR352W	19	29	0.58628	0.57045	0.76778	1.22728	0.56419	0.63267	1.33194	1.83357	1.17379	1.51172	1.20515	1.79967	0.459225	0.819235	0.751025	1.06381	0.64263	0.74097
YDR452W	19 - YDR452W ... PPN1 polyphosphate metabolism endopolyphosphatase activity vacuolar membrane | YDR453C	19	29	0.44577	0.43952	0.53018	0.29846	0.39347	0.36809	1.53874	1.19971	1.29838	1.43619	1.88999	1.29313	1.03032	1.10872	1.04333	0.721535	1.22438	0.86816
YBR013C	19 - YBR013C ... YBR013C biological process unknown molecular function unknown cellular component unknown | YBR014C	19	29	0.60322	0.34516	0.55427	0.72101	0.72654	0.35705	1.61329	1.85939	1.42066	1.82862	1.39367	1.24785	1.23569	1.46076	1.57777	1.01599	1.56845	1.2821
YKL038W	19 - YKL038W ... RGT1 glucose metabolism* DNA binding* nucleus | YKL039W	19	29	0.6631	0.57309	0.634	0.4333	0.53463	0.48715	1.73338	1.56173	1.40362	1.88583	1.5133	1.77537	0.866285	0.793475	1.06617	1.18807	1.12686	1.49188
YLR257W	19 - YLR257W ... YLR257W biological process unknown molecular function unknown cytoplasm | YLR258W	19	29	0.48643	0.5307	0.38722	0.22166	0.46547	0.37588	1.2383	1.06014	0.982475	1.57163	1.45618	1.27197	0.940075	0.755355	0.994485	1.1463	1.12488	0.61606
YCL021W-A	19 - YCL021W-A ... YCL021W-A biological process unknown molecular function unknown cellular component unknown | YCL022C	19	29	0.43359	0.4537	0.30804	0.29439	0.22324	0.56907	1.03597	1.25242	0.897855	1.60858	1.02866	1.90207	0.829135	1.3984	1.07455	1.40131	0.6751	1.66413
YMR245W	19 - YMR245W ... | YMR246W	19	29	0.60854	0.45107	0.73102	0.78023	0.71641	0.61542	1.46799	1.38925	1.83255	1.44836	1.38695	1.59154	0.693755	0.850655	1.05831	1.88796	0.83529	1.15177
YBR151W	19 - YBR151W ... APD1 biological process unknown molecular function unknown cytoplasm* | YBR152W	19	29	0.69319	0.29672	0.48904	0.46415	0.64417	0.29976	1.84671	1.84546	1.49167	1.27414	1.4909	1.66054	0.565455	0.884345	0.962945	0.932985	0.89065	0.95191
YDL247W	19 - YDL247W ... MPH2 carbohydrate transport carbohydrate transporter activity* plasma membrane | YDL247W-A	19	29	0.67069	0.97818	0.50384	0.70756	0.59405	0.82795	1.42737	1.66745	1.73158	1.7011	1.14513	1.8799	0.839255	1.23294	0.840555	1.32634	0.77067	0.93562
YJR160C	19 - YJR160C ... MPH3 carbohydrate transport carbohydrate transporter activity* plasma membrane | YJR161C	19	29	0.40883	0.58506	0.36469	0.92071	0.41301	0.84579	1.29537	1.60573	1.46357	1.70768	1.10318	1.92891	0.733035	1.08879	0.613945	1.18609	0.62356	0.9821
YML028W	19 - YML028W ... TSA1 response to oxidative stress* thioredoxin peroxidase activity cytoplasm | YML029W	19	29	0.0724	0.21653	0.32692	0.5741	1.12412	-0.23873	1.1052	1.07022	1.4103	1.2734	1.70246	1.1059	1.13223	1.06936	1.36652	0.840985	0.97155	0.97637
YGL074C	19 - YGL074C ... | YGL075C	19	29	0.27612	-0.09296	0.23876	0.75337	0.6565	-0.02035	1.10733	1.4844	1.78991	1.79957	1.33171	1.74348	1.37031	0.917095	0.990895	1.1948	1.17352	1.25602
YLR231C	19 - YLR231C ... BNA5 NAD biosynthesis kynureninase activity cytoplasm* | YLR232W	19	29	1.016	0.82489	0.94139	0.91796	1.27209	0.72833	1.42138	1.89321	1.49331	1.60284	1.43128	1.38613	0.449005	0.737075	0.665235	0.554565	0.42422	0.96084
YNL117W	22 - YNL117W ... MLS1 glyoxylate cycle malate synthase activity cytoplasm* | YNL118C	22	29	0.0976	0.03268	-0.0446	0.07055	0.23251	0.17792	0.9171	1.15586	0.825505	1.18525	0.95503	1.34933	0.567065	0.659865	0.509525	0.325665	0.4151	0.41056
YDL134C	22 - YDL134C ... PPH21 protein biosynthesis* protein phosphatase type 2A activitprotein phosphatase type 2A complex | YDL135C	22	29	0.30785	0.3343	0.31247	0.33038	0.37327	0.32531	0.55631	1.0774	0.314785	0.655645	0.51578	0.690175	0.617845	0.584655	0.636145	0.543485	0.67371	0.78555
YDL237W	22 - YDL237W ˜ AIM6 biological process unknown molecular function unknown | Putative protein of unknown function, required for respiratory growth; YDL237W is not an essential geneYDL238C	22	29	0.14974	0.18542	0.14417	0.39076	0.55958	0.11647	1.11112	1.17948	0.675665	0.719905	0.79941	0.734905	0.497755	0.571015	0.624335	0.639785	0.70423	0.59081
YDL046W	22 - YDL046W ... NPC2 biological process unknown molecular function unknown vacuole (sensu Fungi) | YDL047W	22	29	0.24376	0.28101	0.23225	0.28363	0.18158	0.27883	0.69242	0.706165	0.643465	0.558105	0.88218	0.551865	0.540975	0.564205	0.602065	0.678895	0.8324	0.45677
YNR008W	22 - YNR008W ... LRO1 triacylglycerol biosynthesis* phospholipid:diacylglycerol acyltraendoplasmic reticulum | YNR009W	22	29	0.08489	0.2947	0.27064	0.22814	0.38499	0.27604	0.69141	0.699795	0.797725	0.711905	0.79995	0.770935	0.588905	0.740145	0.516885	0.456235	0.59562	0.62624
YER026C	22 - YER026C ... CHO1 phosphatidylserine biosynthesi CDP-diacylglycerol-serine O-phosphaendoplasmic reticulum | YER027C	22	29	0.17311	-0.02665	-0.04063	0.27175	0.31354	0.19879	0.93093	0.872265	0.784085	0.710915	0.84506	0.951255	0.494865	0.720825	0.638485	0.505625	0.66956	0.90366
YOR349W	22 - YOR349W ... CIN1 post-chaperonin tubulin foldin beta-tubulin binding cellular component unknown | YOR350C	22	29	0.11544	0.22142	0.29417	0.25571	0.31105	0.12397	0.61513	0.768355	0.652765	0.892205	0.56928	0.825735	0.536555	0.538175	0.656055	0.761455	0.38039	0.94114
YHR123W	22 - YHR123W ... EPT1 phosphatidylethanolamine biosy ethanolaminephosphotransferase actiendoplasmic reticulum | YHR124W	22	29	0.25682	0.36906	0.4196	0.48633	0.31357	0.24352	0.92426	1.19948	0.893655	0.842295	0.90903	0.974975	0.221715	0.629355	0.677855	0.645205	0.60937	0.65728
YHR190W	22 - YHR190W ... ERG9 ergosterol biosynthesis farnesyl-diphosphate farnesyltransfendoplasmic reticulum | YHR191C	22	29	0.12275	0.14184	0.19954	0.23778	0.12347	0.24417	0.79967	1.24849	0.445255	0.719825	0.59219	0.893435	0.398335	0.500915	0.530765	0.562875	0.95081	0.56024
YNL335W	22 - YNL335W ˜ DDI3 biological process unknown molecular function unknown | Protein of unknown function; expression is induced over 100-fold by DNA damage; induction decreased in rad6 and rad18 mutantsYNL336W	22	29	0.07125	-0.04662	0.35659	0.43361	0.46205	0.5371	0.80281	1.08031	0.508785	1.05777	0.7132	0.820685	0.514135	0.679255	0.320175	0.557215	0.45101	0.64011
YBL016W	22 - YBL016W ... FUS3 protein amino acid phosphoryla MAP kinase activity cytoplasm* | YBL017C	22	29	0.1124	0.4195	0.23735	0.48949	0.24897	0.37821	0.7937	0.968935	0.513595	0.886135	1.00812	1.09667	0.460835	0.592435	0.714465	0.543485	0.39161	0.87299
YFL061W	22 - YFL061W ... DDI2 biological process unknown molecular function unknown cellular component unknown | YFL062W	22	29	0.27892	-0.09295	0.51913	0.31978	0.38836	0.43529	0.91762	0.925805	0.570485	0.864735	0.70085	0.853525	0.465965	0.394135	0.395585	0.938475	0.46024	0.72296
YBL013W	22 - YBL013W ... FMT1 translational initiation* methionyl-tRNA formyltransferase acmitochondrion | YBL014C	22	29	0.09742	0.27427	0.55986	0.55531	0.68542	0.40537	1.12116	1.04638	0.910345	1.2183	1.06096	1.03655	0.644265	0.845785	0.444885	0.671725	0.56832	1.07681
YPL006W	22 - YPL006W ... NCR1 sphingolipid metabolism sphingolipid transporter activity vacuolar membrane (sensu Fungi) | YPL007C	22	29	0.11775	0.27631	0.23813	0.36191	0.49283	0.18598	1.13423	1.51143	1.05845	0.998095	1.25816	1.11156	0.660165	0.890045	0.948745	0.916035	1.10076	0.98603
YDR415C	22 - YDR415C ... YDR415C biological process unknown molecular function unknown cellular component unknown | YDR416W	22	29	0.33705	0.26639	0.6226	0.3807	0.37069	0.64942	0.69696	1.12809	0.668285	0.788995	0.68132	0.615535	0.484725	0.598915	0.652045	0.550455	0.70821	0.60909
YDL190C	22 - YDL190C ... UFD2 response to stress* ubiquitin conjugating enzyme activicytoplasm* | YDL191W	22	29	0.46569	0.35028	0.57122	0.43715	0.4977	0.24483	0.87792	0.723965	0.625175	0.564195	0.65193	0.761315	0.673525	0.525825	0.759935	0.574115	0.87654	0.80444
YFR021W	22 - YFR021W ... ATG18 protein-vacuolar targeting* phosphoinositide binding cytosol* | YFR022W	22	29	0.50855	0.43965	0.46223	0.41827	0.47512	0.26471	0.77647	1.00602	0.658625	0.835055	0.70435	0.780095	0.490845	0.640995	0.721315	0.642435	1.10469	0.89851
YNL008C	22 - YNL008C ... ASI3 ubiquitin-dependent protein ca ubiquitin-protein ligase activity endoplasmic reticulum membrane | YNL009W	22	29	0.2727	0.55515	0.49604	0.49685	0.26735	0.34149	0.83973	0.964755	0.899965	0.554395	0.80754	0.745025	0.340485	0.622325	0.648885	0.732075	0.82223	0.84031
YOR291W	22 - YOR291W ˜ YPK9 biological process unknown molecular function unknown | Vacuolar protein with a possible role in sequestering heavy metals; has similarity to the type V P-type ATPase Spf1p; homolog of human ATP13A2 (PARK9), mutations in which are associated with Parkinson disease and Kufor?Rakeb syndromeYOR292C	22	29	0.26489	0.4259	0.43645	0.37199	0.76944	0.60088	0.78339	1.24659	0.939305	0.855935	0.8274	0.893015	0.471165	0.685025	0.619615	0.658775	0.82572	0.99621
YOL057W	22 - YOL057W ... YOL057W proteolysis and peptidolysis metalloendopeptidase activity cytoplasm* | YOL058W	22	29	0.23326	0.37678	0.20354	0.37547	0.57002	0.08848	0.8999	1.21524	0.743595	0.554525	0.5628	0.913605	0.818615	0.867495	0.840905	0.827445	0.86778	1.08002
YGL036W	22 - YGL036W ... YGL036W biological process unknown molecular function unknown cytoplasm | YGL037C	22	29	0.47727	0.63066	0.44376	0.42935	0.32621	0.56587	0.72049	1.23506	0.876455	0.929485	0.78652	0.963675	0.574595	0.504385	0.588645	0.754125	0.62479	0.89759
YGL161C	22 - YGL161C ... YIP5 vesicle-mediated transport Rab GTPase binding membrane | YGL162W	22	29	0.47647	0.27122	0.31353	0.40142	0.35904	0.35879	0.79513	1.23706	0.931615	1.09686	1.03145	1.06095	0.384315	0.487655	0.770595	0.618145	0.71377	0.99746
YBL007C	22 - YBL007C ... SLA1 cell wall organization and bio "protein binding, bridging*" actin cortical patch | YBL008W	22	29	0.31531	0.38835	0.40681	0.27916	0.21947	0.39195	0.78945	0.849175	0.796995	0.734115	0.87365	0.869735	0.866465	0.729955	0.785345	0.606795	0.91712	0.71382
YIL125W	22 - YIL125W ... KGD1 tricarboxylic acid cycle* oxoglutarate dehydrogenase (succinymitochondrial matrix* | YIL126W	22	29	0.35904	0.06839	0.44079	0.17183	0.42708	0.2715	1.08956	1.18532	0.820285	0.959315	0.91881	1.00266	0.787515	0.996805	0.952465	0.839855	0.98842	0.93266
YEL020C	22 - YEL020C ... YEL020C biological process unknown molecular function unknown cytoplasm | YEL020W-A	22	29	0.41315	0.31483	0.32636	0.41216	0.74662	0.3304	1.19945	1.05438	0.770305	0.992135	1.12276	0.941405	0.722145	0.790935	0.701495	0.419075	0.76436	0.83406
YOR367W	22 - YOR367W ... SCP1 actin filament organization* "protein binding, bridging*" actin cortical patch | YOR368W	22	29	0.31995	0.14615	0.22076	0.32	0.14309	0.47149	1.07679	0.748615	0.884155	1.11715	1.13165	1.02519	0.793335	0.560545	0.959155	0.627395	0.87033	0.68172
YPR003C	22 - YPR003C ... YPR003C biological process unknown molecular function unknown endoplasmic reticulum | YPR004C	22	29	0.16052	0.28008	0.26014	0.24192	0.52737	0.38529	1.17066	1.3374	0.802745	1.17009	0.85883	1.02181	0.500395	0.754065	0.840215	0.795375	0.67534	0.84134
YGR244C	22 - YGR244C ... LSC2 tricarboxylic acid cycle* succinate-CoA ligase (ADP-forming) mitochondrion | YGR245C	22	29	0.03676	-0.16131	-0.08757	-0.09489	0.31421	-0.10012	1.00943	1.19477	1.15417	1.0234	1.13405	1.16322	0.822045	0.840315	0.970575	0.839605	1.00262	0.97307
YHR001W	22 - YHR001W ... OSH7 steroid biosynthesis oxysterol binding cellular component unknown | YHR001W-A	22	29	0.09507	-0.11404	-0.0217	-0.04898	0.28053	0.09828	0.83319	1.04404	0.938095	1.11496	0.94551	0.893625	0.685115	0.721815	0.652515	0.787195	0.76115	0.57271
YLR450W	22 - YLR450W ... HMG2 ergosterol biosynthesis hydroxymethylglutaryl-CoA reductaseendoplasmic reticulum membrane* | YLR451W	22	29	0.01222	0.07117	0.14259	0.27997	0.14368	-0.05598	0.89779	1.43951	1.05366	0.759875	0.94568	0.947215	0.596095	0.905375	0.839595	0.750935	0.90635	0.94121
YOR162C	22 - YOR162C ... YRR1 positive regulation of transcr specific RNA polymerase II transcrinucleus | YOR163W	22	29	0.33101	-0.01386	0.07419	-0.06178	0.1487	0.2758	0.94888	0.800445	0.778165	1.01734	0.63408	0.805735	0.755635	0.792275	1.10329	0.739945	0.61378	0.93034
YGL206C	22 - YGL206C ... CHC1 endocytosis* structural molecule activity clathrin vesicle coat | YGL207W	22	29	0.08757	-0.06308	0.02369	0.1224	0.01218	0.18124	0.83454	1.21754	0.615015	0.781005	0.48367	0.950395	0.708075	1.09072	0.982645	0.741785	1.16747	0.91325
YOL075C	22 - YOL075C ... YOL075C transport "ATPase activity, coupled to transme"membrane | YOL076W	22	29	-0.09006	0.31867	-0.07782	0.19542	0.28969	0.23703	0.72957	1.09116	0.596665	0.719485	0.61227	0.676625	0.509005	0.897905	0.695165	0.923925	0.92563	1.06814
YOR042W	22 - YOR042W ... CUE5 biological process unknown molecular function unknown cytoplasm | YOR043W	22	29	0.51339	0.35179	0.2513	-0.05381	0.39312	0.45472	0.64115	0.595605	0.744355	0.858845	0.90705	0.599825	0.945015	0.516905	0.852515	0.292125	0.75187	0.85388
YIL009C-A	22 - YIL009C-A ... EST3 telomerase-dependent telomere telomerase activity nucleus* | YIL009W	22	29	0.22302	0.02803	0.23421	0.23525	0.30255	0.35958	0.74009	0.808465	0.719005	0.948415	0.70143	0.893535	0.735425	0.864895	0.986125	1.11894	0.8941	0.73285
YJL160C	22 - YJL160C ... YJL160C biological process unknown molecular function unknown cellular component unknown | YJL161W	22	29	0.38413	0.40278	0.28228	0.3145	0.52043	0.59849	1.18946	1.17711	0.679955	0.815735	0.92568	0.893535	0.553345	0.322695	0.957615	0.518545	0.5828	0.45987
YJL159W	22 - YJL159W ... HSP150 cell wall organization and bio structural constituent of cell wallcell wall (sensu Fungi) | YJL160C	22	29	0.05326	0.25568	-0.11361	0.20159	0.13975	0.27391	0.96393	0.952685	1.26659	0.890795	1.57524	0.712035	0.897615	0.651865	0.383785	0.587715	1.18191	0.96598
YOR176W	22 - YOR176W ... HEM15 heme biosynthesis ferrochelatase activity mitochondrial inner membrane | YOR177C	22	29	0.06981	-0.22686	0.02953	0.02499	0.41544	-0.04387	1.18386	1.44929	0.968775	1.20661	0.84629	1.10617	0.644425	0.555035	0.580965	1.12816	0.75865	0.9831
YAL054C	35 - YAL054C ... ACS1 acetyl-CoA biosynthesis* acetate-CoA ligase activity mitochondrion* | YAL055W	35	29	2.89729	3.44029	3.20081	3.05325	3.35852	2.94502	6.05525	5.77196	5.16962	6.1814	5.73747	6.33678	1.69959	2.23074	1.94884	2.90382	1.91259	2.47825
YOL084W	35 - YOL084W iESR cluster PHM7 biological process unknown molecular function unknown vacuole (sensu Fungi) | YOL085C	35	29	3.19252	3.88678	3.42627	3.82055	3.38738	3.19761	6.55967	6.0652	5.85086	6.3068	5.83631	6.58296	2.43051	2.87804	2.61864	3.31453	2.73399	3.36108
YPR151C	35 - YPR151C iESR cluster SUE1 protein catabolism molecular function unknown mitochondrial membrane | YPR152C	35	29	1.29364	2.05529	1.21268	1.63897	1.21588	1.64611	5.1009	5.05537	5.16521	5.67624	5.51964	5.23142	3.8226	3.33876	3.93107	2.40306	3.49111	3.39656
YDL222C	35 - YDL222C iESR cluster FMP45 cell wall organization and bio molecular function unknown mitochondrion* | YDL223C	35	29	2.20056	2.70789	2.06211	2.54261	3.41522	3.54214	6.83978	7.14321	6.27281	6.89203	6.34211	6.53754	2.25063	3.4941	3.17387	3.02659	3.78205	3.73206
YDL223C	35 - YDL223C ... HBT1 cellular morphogenesis during molecular function unknown mating projection | YDL224C	35	29	2.04334	2.16891	1.85442	1.66213	2.59342	2.83551	6.81415	6.90027	6.26844	6.65569	5.66226	6.59202	2.27448	3.23732	2.80468	2.55414	2.76805	3.22734
YER062C	35 - YER062C ... HOR2 response to osmotic stress* glycerol-1-phosphatase activity cytoplasm* | YER063W	35	29	2.376	2.1427	2.51973	2.32755	2.60785	2.36067	4.46521	4.50284	4.61648	4.51652	4.84201	4.87279	4.24859	4.51534	4.27829	3.94694	4.45804	4.42566
YMR169C	35 - YMR169C iESR cluster ALD3 response to stress* aldehyde dehydrogenase activity cytoplasm | YMR170C	35	29	1.99061	1.9874	1.67916	1.60294	2.80172	2.42105	3.93197	4.14621	3.20581	4.52247	1.94813	3.84753	3.0301	4.42385	4.18058	4.73557	4.36012	5.05665
YDR342C	35 - YDR342C ... HXT7 hexose transport glucose transporter activity* mitochondrion* | YDR343C	35	29	0.85976	2.10081	1.87355	0.64215	2.12051	1.29659	4.16265	5.06147	4.28435	4.79769	4.18936	4.95716	3.73924	3.52188	3.78851	3.59913	4.44268	4.0264
YDR343C	35 - YDR343C ... HXT6 hexose transport glucose transporter activity* mitochondrion* | YDR344C	35	29	0.93673	1.81363	1.77139	0.53463	2.28476	1.30675	4.44104	4.99036	4.00497	4.92401	4.14326	4.8488	3.62532	3.7363	4.23815	3.34398	4.51897	4.18997
YMR195W	35 - YMR195W ... ICY1 biological process unknown molecular function unknown vacuolar membrane (sensu Fungi) | YMR196W	35	29	1.50564	1.35564	1.25327	0.84931	1.76393	1.64717	4.64604	4.24536	4.18518	5.26888	4.22783	4.47285	2.85682	2.71037	3.50821	2.66676	3.10303	2.97615
YML054C	35 - YML054C ... CYB2 electron transport L-lactate dehydrogenase (cytochromemitochondrial intermembrane space | YML054C-A	35	29	2.1009	2.63217	1.81064	1.01944	2.25023	2.16053	5.30261	4.90815	4.48965	4.9646	5.17112	5.34701	2.89799	3.09863	3.15069	3.13606	3.0361	3.23889
YDL124W	35 - YDL124W iESR cluster YDL124W metabolism alpha-keto amide reductase activitycytoplasm* | YDL125C	35	29	2.86042	2.62144	2.91683	2.61021	2.7048	2.41692	6.18386	5.20805	4.93365	6.20191	5.84454	5.75462	5.18424	5.30081	5.61745	5.14103	5.30699	5.51194
YDL204W	35 - YDL204W iESR cluster RTN2 biological process unknown molecular function unknown endoplasmic reticulum | YDL205C	35	29	1.9729	2.55638	2.51966	1.86278	2.92808	3.21581	5.34362	5.86932	4.76532	5.95962	4.23845	5.4261	4.22572	5.87059	5.65233	5.46671	5.64829	5.99769
YNL160W	35 - YNL160W iESR cluster YGP1 response to stress* molecular function unknown cell wall (sensu Fungi) | YNL161W	35	29	2.16084	2.47273	2.67689	2.37826	2.43215	2.61149	6.11223	5.83458	5.18968	5.68515	4.84355	5.5792	3.08001	3.59428	4.24817	4.293	4.41784	4.4206
YPR038W	23 - YPR038W ˜ IRC16 | Dubious open reading frame unlikely to encode a protein, based on available experimental and comparative sequence data; partially overlaps verified gene YPR037C; null mutant displays increased levels of spontaneous Rad52p fociYPR039W	23	32	1.22528	0.79337	1.10911	1.06962	0.73354	0.50325	2.36868	1.95321	2.45937	2.2246	2.40569	2.48495	1.16775	0.525335	1.41604	3.6819	1.41471	0.51131
YEL059W	23 - YEL059W ... | YEL060C	23	32	0.45916	2.05975	1.02175	1.49078	1.14465	1.25779	3.07877	1.74893	1.49023	1.99944	1.97096	2.88296	1.6543	1.67813	0.420315	1.80842	1.05704	0.07343
YGR052W	23 - YGR052W ... FMP48 biological process unknown kinase activity mitochondrion | YGR053C	23	32	0.84445	0.66616	0.87986	1.44429	0.66577	0.79708	2.98655	3.1164	2.73125	3.33934	1.8487	2.98232	-0.193905	0.196035	0.429055	1.4726	0.29116	0.3855
YKL163W	23 - YKL163W ... PIR3 cell wall organization and bio structural constituent of cell wallcell wall (sensu Fungi) | YKL164C	23	32	0.90119	1.3518	0.7283	1.06521	1.06786	1.38649	2.79494	2.65858	1.88383	3.41891	3.03224	3.03966	0.340325	1.3009	0.934895	1.78981	1.61084	0.98728
YBL107W-A	23 - YBL107W-A ... | YBL108C-A	23	32	0.59042	0.9047	0.77566	0.88853	1.12593	0.89983	3.1004	2.63294	3.35065	3.86442	2.68786	3.1519	0.676325	0.621865	0.517035	0.711555	0.13474	0.74976
YJL048C	23 - YJL048C iESR cluster UBX6 ubiquitin-dependent protein ca molecular function unknown nucleus | YJL049W	23	32	1.75751	1.48892	1.72619	1.51376	1.83483	1.42778	2.94173	2.80416	2.71925	2.97572	2.82552	2.7342	0.843075	0.985085	0.956815	1.58688	1.16856	1.2376
YML042W	23 - YML042W iESR cluster CAT2 carnitine metabolism carnitine O-acetyltransferase activmitochondrion* | YML043C	23	32	1.3744	1.61803	1.46055	1.25729	1.45339	1.95737	3.28656	3.33351	2.74211	3.53309	3.10794	3.20254	1.1878	1.47178	1.31627	1.88325	1.5441	1.43038
YPR001W	23 - YPR001W ... CIT3 tricarboxylic acid cycle* citrate (Si)-synthase activity mitochondrial matrix | YPR002C-A	23	32	0.85387	1.48473	1.1408	1.38589	1.65565	1.53965	2.78614	3.18065	2.96803	3.145	2.80857	3.30842	0.975265	1.17553	0.885975	1.33821	0.86219	1.05612
YKL217W	23 - YKL217W ... JEN1 lactate transport lactate transporter activity mitochondrion* | YKL218C	23	32	0.6775	1.4205	0.71742	1.14702	1.23151	1.02839	3.45342	2.96821	2.52745	3.57049	3.21248	3.51231	0.770375	0.987125	1.1221	1.61733	1.18621	1.25214
YNR002C	23 - YNR002C ˜ iESR cluster ATO2 transport* transporter activity mitochondrion* | Putative transmembrane protein involved in export of ammonia, a starvation signal that promotes cell death in aging colonies; phosphorylated in mitochondria; member of the TC 9.B.33 YaaH family; homolog of Ady2p and Y. lipolytica Gpr1pYNR003C	23	32	1.24857	1.44161	1.01472	0.97317	1.33002	1.0748	3.69937	3.31134	2.68063	3.97036	3.62549	3.54277	0.676975	0.675445	1.08272	1.42199	1.20291	1.6019
YDR119W-A	23 - YDR119W-A YDR119W-A YDR374W-A	23	32	1.73794	1.97563	1.90052	1.53437	2.76045	1.75106	3.54286	2.9326	2.47777	3.76572	2.32676	4.29622	-0.217195	0.115765	0.720865	2.04325	0.65156	1.74064
YNL097W-A	23 - YNL097W-A ˜ Dubious Dubious open reading frame unlikely to encode a protein, based on available experimental and comparative sequence data; completely overlaps the verified gene PHO23/YNL097CYNL103W-A	23	32	1.82733	1.80588	1.67405	2.04388	2.25953	1.08667	3.06008	2.86339	3.43725	2.10873	3.3523	2.54238	0.665635	0.867905	0.744615	0.597445	1.12283	0.67723
YAL061W	23 - YAL061W ˜ iESR cluster BDH2 biological process unknown "oxidoreductase activity, acti | Putative medium-chain alcohol dehydrogenase with similarity to BDH1; transcription induced by constitutively active PDR1 and PDR3; BDH2 is an essential geneYAL062W	23	32	2.01262	1.62641	1.51347	1.86448	1.9968	2.06243	3.15233	3.00392	2.65625	2.97212	2.2214	3.1656	0.273495	0.870675	1.08258	1.66986	1.55794	2.30419
YDR034C-D	23 - YDR034C-D YDR034C-D ò TRANSPOSABLE TY ELEMENTYDR098C-A	23	32	1.6051	1.90643	1.6303	1.51233	1.2182	1.65975	3.41228	3.42292	3.93627	3.45575	3.12717	3.32232	0.652355	0.772685	0.742005	0.823085	0.21809	1.02815
YOR343W-B	23 - YOR343W-B YOR343W-B ò TRANSPOSABLE TY ELEMENTYOR396C-A	23	32	1.30372	1.60361	1.45883	1.52082	1.15165	1.90822	3.45133	3.50786	3.70786	3.75296	3.34581	3.4369	0.510725	0.482465	0.360075	0.893755	0.11634	0.85594
YMR322C	23 - YMR322C ... SNO4 pyridoxine metabolism unfolded protein binding* cellular component unknown | YMR323W	23	32	0.90908	1.51878	1.34116	1.69225	1.69567	1.49399	3.04867	3.62687	2.95899	3.40861	2.80765	4.00455	0.164365	0.656255	0.631895	0.554135	0.70031	0.47292
YPL280W	23 - YPL280W ... HSP32 biological process unknown unfolded protein binding* cellular component unknown | YPL281C	23	32	0.86595	1.70656	1.40208	1.89928	1.71314	1.61089	2.9332	3.51829	2.91054	3.585	3.24909	3.81968	0.207595	0.239825	0.771465	0.499435	0.51086	0.84675
YOR391C	23 - YOR391C ... HSP33 biological process unknown unfolded protein binding* cellular component unknown | YOR392W	23	32	1.21665	1.61289	1.67098	1.86868	2.04495	1.98444	3.57009	3.76421	3.57417	3.85771	3.30311	4.00725	0.711575	0.459355	0.528735	0.704145	0.514	0.78065
YOR348C	23 - YOR348C ... PUT4 proline catabolism* L-proline permease activity* plasma membrane | YOR349W	23	32	0.58734	1.02742	0.19425	0.34259	0.53444	0.51779	3.0039	3.55294	2.90008	3.61593	3.20248	3.6397	1.04516	1.22135	1.37272	1.95852	2.01975	1.78355
YPL171C	23 - YPL171C ... OYE3 biological process unknown NADPH dehydrogenase activity cellular component unknown | YPL172C	23	32	0.3204	0.49617	0.74461	0.95212	1.21822	0.66531	2.90659	2.64798	2.52195	3.25804	3.26365	3.4771	1.06605	1.3561	1.25964	2.53243	1.19983	1.3318
YMR175W	23 - YMR175W ... SIP18 response to osmotic stress* phospholipid binding soluble fraction | YMR175W-A	23	32	1.23148	1.05866	1.19576	1.54743	1.9783	2.08482	2.77945	2.63339	2.34647	2.96929	1.75389	2.87827	0.985605	1.59824	1.26771	1.45528	1.54344	2.23143
YBR067C	23 - YBR067C ... TIP1 cell wall organization and bio structural constituent of cell wallcell wall (sensu Fungi) | YBR068C	23	32	1.32554	1.48006	1.56246	1.85673	1.54413	0.66034	2.53278	2.41037	3.08759	2.77469	2.65888	2.58004	1.23344	1.22609	1.24947	1.96654	1.0993	2.643
YPL119C	23 - YPL119C ... DBP1 translational initiation* RNA helicase activity cytoplasm | YPL119C-A	23	32	1.56534	1.4996	1.63935	1.68984	1.92212	2.03362	2.51893	2.35584	2.09076	2.69414	2.34694	2.40997	0.816065	0.991145	0.749575	1.63451	0.85551	1.00367
YDR262W	20 - YDR262W ... YDR262W biological process unknown molecular function unknown vacuole (sensu Fungi) | YDR263C	20	32	0.42625	0.27515	0.19059	0.49698	0.71471	0.19429	0.95563	0.682015	0.567885	0.475345	0.62083	0.681325	-0.189485	0.087315	0.058225	0.174995	-0.17916	0.39135
YGL198W	20 - YGL198W ... YIP4 vesicle-mediated transport Rab GTPase binding membrane | YGL199C	20	32	0.53038	0.59993	0.50404	0.60989	0.458	-0.04537	0.94242	0.603985	0.702955	0.654055	0.91545	0.642505	-0.014755	-0.271995	0.049075	0.295115	0.34653	0.41134
YBR096W	20 - YBR096W ... YBR096W biological process unknown molecular function unknown endoplasmic reticulum | YBR097W	20	32	0.35384	0.23736	0.60471	0.50322	0.14064	0.05176	1.1599	1.00005	0.900835	0.619575	1.17598	0.799875	0.309525	0.311625	0.285405	0.147345	0.7767	0.221
YGR125W	20 - YGR125W ... YGR125W biological process unknown molecular function unknown vacuole (sensu Fungi) | YGR126W	20	32	0.06666	0.40505	0.48586	0.359	0.3897	0.38156	0.4059	0.852405	0.590695	0.235305	0.45233	0.431235	-0.075035	0.124365	-0.115525	0.346035	0.26427	0.18277
YFL031W	20 - YFL031W ... HAC1 regulation of transcription fr transcription factor activity* nucleus | YFL032W	20	32	0.25839	0.4465	0.43273	0.51826	0.47395	0.18622	0.47531	0.686035	0.572395	0.502355	0.61361	0.389795	0.257495	0.267935	-0.046315	-0.022315	0.40774	0.11828
YFR047C	20 - YFR047C ... BNA6 NAD biosynthesis nicotinate-nucleotide diphosphorylacytoplasm* | YFR048W	20	32	0.35426	0.36856	0.31122	0.6821	0.51156	0.47682	0.50576	0.925475	0.497715	0.405295	0.59454	0.541275	-0.133675	0.008495	0.188255	0.088095	0.14079	0.33459
YML127W	20 - YML127W ... RSC9 regulation of transcription fr chromatin binding RSC complex | YML128C	20	32	0.64002	0.5318	0.61191	0.684	0.74473	0.28277	0.77439	0.870385	0.554695	0.597425	0.68182	0.706405	-0.051775	0.287295	0.318675	0.257565	0.37343	0.64809
YDR177W	20 - YDR177W ... UBC1 endocytosis* ubiquitin conjugating enzyme activiproteasome complex (sensu Eukaryota | YDR178W	20	32	0.58668	0.37731	0.43181	0.37909	0.59739	0.5001	0.39745	0.822235	0.671015	0.583475	0.73729	0.657945	0.305355	0.359195	0.294105	0.118645	0.17133	-0.04769
YJL137C	20 - YJL137C ... GLG2 glycogen biosynthesis glycogenin glucosyltransferase acticytoplasm | YJL138C	20	32	0.59909	0.42525	0.60552	0.35827	0.50515	0.44373	0.71828	0.726305	0.492685	0.800295	0.6801	0.597915	0.062185	0.154975	-0.000305	0.458325	-0.10887	0.08206
YKL020C	20 - YKL020C ... SPT23 positive regulation of transcr DNA binding* nucleus* | YKL021C	20	32	0.80329	0.54815	0.64229	0.55922	0.41481	0.47102	0.8537	0.692175	0.653975	0.503205	0.43304	0.732525	0.258325	0.055025	0.320915	0.424985	0.29022	0.32172
YJL083W	20 - YJL083W ... TAX4 cell wall organization and bio molecular function unknown cellular component unknown | YJL084C	20	32	0.54461	0.48002	0.56522	0.27864	0.48577	0.48823	0.64365	0.655765	0.553175	0.671625	0.60468	0.594515	0.130745	-0.010335	0.259385	0.296455	0.36429	0.27545
YPL271W	20 - YPL271W ... ATP15 ATP synthesis coupled proton t hydrogen-transporting ATP synthase "proton-transporting ATP synthase, c" | YPL272C	20	32	0.47562	0.50338	0.3731	0.49142	0.64759	0.26341	0.49503	0.351945	0.579405	0.732145	0.88436	0.353705	0.109975	0.260475	0.175945	0.267055	0.20989	0.12878
YGL166W	20 - YGL166W ... CUP2 transcription initiation from ligand-regulated transcription factnucleus | YGL167C	20	32	0.61866	0.33672	0.79712	0.81906	0.34435	0.02204	0.68574	0.584675	0.729155	0.907445	0.89687	0.746925	0.182465	0.359175	0.307985	-0.140765	0.36443	0.32965
YGL178W	20 - YGL178W ... MPT5 cell wall organization and bio mRNA binding cytoplasm | YGL179C	20	32	0.58004	0.7212	0.51049	0.57203	0.22066	0.4723	0.77531	0.517835	0.616815	0.650265	0.57051	0.802775	0.172215	0.106845	0.264315	0.570715	0.43808	0.37012
YBR243C	20 - YBR243C ... ALG7 N-linked glycosylation UDP-N-acetylglucosamine-dolichyl-phendoplasmic reticulum | YBR244W	20	32	0.25121	0.43035	0.14389	0.55497	0.23177	-0.19856	0.53048	0.787115	0.928035	0.461165	0.68271	0.413325	0.475555	0.296335	0.386125	0.453565	0.50224	0.42636
YNL271C	20 - YNL271C ... BNI1 actin filament organization* cytoskeletal regulatory protein binbud neck* | YNL272C	20	32	0.07794	0.42446	0.20955	0.13755	0.11439	0.29195	0.45123	0.476495	0.765555	0.373165	0.48158	0.532355	0.247025	0.317885	0.330565	0.309135	0.31263	0.33755
YJL084C	20 - YJL084C ˜ ALY2 biological process unknown cyclin binding | Protein proposed to regulate the endocytosis of plasma membrane proteins; interacts with the cyclin Pcl7p and ubiquitin ligase Rsp5p; phosphorylated by the cyclin-CDK complex, Pcl7p-Pho85p; mRNA is cell cycle regulated, peaking in M phaseYJL085W	20	32	0.30601	0.41866	0.29923	0.18317	0.35101	0.42082	0.83501	0.441095	0.612045	0.805365	0.58984	0.631625	0.335055	0.129435	0.331905	0.389135	0.3746	0.47689
YKL219W	20 - YKL219W ... COS9 biological process unknown molecular function unknown cellular component unknown | YKL220C	20	32	0.45395	0.44901	0.37294	0.46172	0.57058	0.09934	0.69824	0.686885	0.807605	0.586525	0.88044	0.615995	0.288615	0.457115	0.192695	0.367765	0.46426	0.55503
YPL172C	20 - YPL172C ... COX10 protein complex assembly* protoheme IX farnesyltransferase acmitochondrial inner membrane | YPL173W	20	32	0.49107	0.23095	0.3838	0.27132	0.47496	0.23626	0.76793	0.650015	0.604855	0.624155	0.95416	0.719685	0.141705	0.219755	0.356785	0.479395	0.41016	0.36977
YBL011W	20 - YBL011W ... SCT1 phospholipid biosynthesis glycerol-3-phosphate O-acyltransferendoplasmic reticulum | YBL012C	20	32	0.1389	0.25535	0.38433	0.35775	0.17434	0.04979	0.74952	0.765135	0.544725	0.474985	0.44893	0.510325	0.186425	0.199095	0.361875	0.368295	0.39354	0.53417
YGL142C	20 - YGL142C ... GPI10 GPI anchor biosynthesis mannosyltransferase activity integral to membrane | YGL143C	20	32	0.12063	0.2778	0.26367	0.37705	0.15481	0.15449	0.61087	1.00551	0.796165	0.526445	0.62843	0.579245	0.316745	0.506015	0.397025	0.456355	0.57618	0.52568
YDR306C	20 - YDR306C ... YDR306C ubiquitin-dependent protein ca protein binding ubiquitin ligase complex | YDR307W	20	32	0.47509	0.30591	0.42639	0.36456	0.32362	0.32027	0.66337	0.987345	0.764995	0.884325	0.65844	0.808075	0.211515	0.184995	0.171945	0.444595	0.15535	0.30352
YKL064W	20 - YKL064W ... MNR2 magnesium ion transport magnesium ion transporter activity membrane | YKL065C	20	32	0.19385	0.2403	0.2452	0.18007	0.25352	0.20038	0.79814	0.887305	0.624375	0.738255	0.59276	0.674015	0.352355	0.310225	0.380235	0.354605	0.32025	0.29008
YPR095C	20 - YPR095C ... SYT1 vesicle-mediated transport* ARF guanyl-nucleotide exchange factmitochondrion | YPR096C	20	32	0.31602	0.32108	0.26105	0.29737	0.19037	0.43595	0.51886	0.785195	0.577795	0.700325	0.53498	0.720295	0.225865	0.287175	0.199305	0.505415	0.33183	0.37022
YPR021C	20 - YPR021C ... AGC1 L-aspartate transport* L-glutamate transporter activity* mitochondrial inner membrane | YPR022C	20	32	0.15591	0.17668	0.27536	0.14442	0.26928	0.14324	0.57853	0.853535	0.525755	0.762885	0.65925	0.746785	0.277175	0.575885	0.408805	0.355735	0.1841	0.44351
YGL157W	20 - YGL157W ... YGL157W biological process unknown oxidoreductase activity* cytoplasm* | YGL158W	20	32	0.48261	0.04695	0.21994	0.08212	0.29236	0.14482	0.84105	0.550365	0.432715	0.689485	0.7178	0.698755	0.268015	0.314555	0.392305	0.371255	0.33311	0.64125
YDR371W	20 - YDR371W ... CTS2 biological process unknown molecular function unknown cytoplasm | YDR372C	20	32	0.43276	0.21381	0.10663	0.38357	0.216	0.52465	0.55271	0.871595	0.401735	0.809225	0.46337	0.641635	0.039175	0.480645	0.307995	0.275545	0.1269	0.28975
YLR049C	20 - YLR049C ... YLR049C biological process unknown molecular function unknown cellular component unknown | YLR050C	20	32	0.18182	0.09449	0.37717	0.26943	0.12634	0.3629	0.52294	0.993785	0.327575	0.798525	0.48332	0.619915	0.125025	0.432045	0.330205	0.356305	0.28634	0.37109
YMR293C	20 - YMR293C ˜ HER2 aerobic respiration amidase activity | Subunit of the trimeric GatFAB AmidoTransferase(AdT) complex; involved in the formation of Q-tRNAQ; required for remodeling of ER caused by Hmg2p overexpression; similar to bacterial GatA glutamyl-tRNA amidotransferaseYMR294W	20	32	0.4279	0.34965	0.31083	0.54912	0.53671	0.47227	0.6001	0.997035	0.816345	0.632625	0.74922	0.735705	0.220945	0.395715	0.166635	0.269575	0.22284	0.3879
YDR438W	20 - YDR438W ˜ THI74 biological process unknown molecular function unknown | Mitochondrial transporter repressible by thiamineYDR439W	20	32	0.41787	0.3578	0.2439	0.18702	0.48667	0.43081	0.58655	0.846005	0.651985	0.624385	0.6994	0.523945	0.024165	0.256175	0.054335	0.049285	0.24712	0.42703
YFR007W	20 - YFR007W ˜ YFH7 biological process unknown molecular function unknown | Putative kinase with similarity to the phosphoribulokinase/uridine kinase/bacterial pantothenate kinase (PRK/URK/PANK) subfamily of P-loop kinasesYFR008W	20	32	0.19329	0.23543	0.43329	0.38557	0.46536	0.43001	0.89688	0.632365	0.460815	0.517315	0.6652	0.624085	0.015515	0.362095	0.489955	0.294645	0.3747	0.27302
YHL017W	20 - YHL017W ... YHL017W biological process unknown molecular function unknown clathrin-coated vesicle | YHL018W	20	32	0.14435	0.24821	0.28841	0.27349	0.07303	0.14714	0.56789	1.16894	0.657395	0.290705	0.534	0.728285	0.176665	0.253375	0.294345	0.397865	0.45782	0.2616
YDR456W	20 - YDR456W ... NHX1 vacuolar acidification* monovalent inorganic cation transpolate endosome | YDR457W	20	32	0.23414	0.43705	0.09904	0.42455	0.41254	0.22372	0.68616	0.945735	0.775305	0.355595	0.82205	0.746545	0.285725	0.351935	0.378875	0.132715	0.51627	0.41519
YGR199W	20 - YGR199W ... PMT6 O-linked glycosylation dolichyl-phosphate-mannose-protein endoplasmic reticulum | YGR200C	20	32	0.01557	0.17222	0.21691	0.34882	0.40977	0.16072	0.61059	0.849455	0.550955	0.279895	0.56333	0.588035	0.044195	0.314545	0.274865	0.251925	0.46926	0.47912
YPL132W	20 - YPL132W ... COX11 aerobic respiration* copper ion binding mitochondrial inner membrane* | YPL133C	20	32	0.04286	0.13522	0.38115	0.24707	0.46535	0.11191	0.49933	0.685295	0.365915	0.432705	0.44553	0.476705	0.131655	0.258905	0.095565	0.143895	0.30841	0.37604
YNL169C	20 - YNL169C ... PSD1 phosphatidylcholine biosynthes phosphatidylserine decarboxylase acmitochondrion* | YNL170W	20	32	0.1885	0.09315	0.26091	0.32559	0.45166	-0.06913	0.6849	0.672465	0.333655	0.542135	0.72244	0.635715	0.183295	0.182105	0.379835	0.394265	0.43449	0.49162
YJR001W	20 - YJR001W ... AVT1 neutral amino acid transport neutral amino acid transporter activacuole | YJR002W	20	32	0.0959	0.15981	0.39429	0.19694	0.25047	0.01392	0.40996	0.771175	0.773775	0.349355	0.49835	0.534295	0.425065	0.184375	0.248405	0.237435	0.45803	0.5029
YJL210W	20 - YJL210W ... PEX2 peroxisome organization and bi protein binding peroxisomal membrane | YJL211C	20	32	0.06777	0.12803	0.49201	0.3553	0.45832	0.23045	0.51926	0.580865	0.590295	0.574345	0.79155	0.578595	0.312475	-0.035645	0.320645	0.308235	0.4236	0.3784
YBR222C	20 - YBR222C ... PCS60 biological process unknown AMP binding cytoplasm* | YBR223C	20	32	0.0935	0.11403	0.21012	0.1192	0.6043	0.05556	0.76589	0.652785	0.804955	0.532625	1.01316	0.480625	0.369785	0.146755	0.325535	0.490415	0.63647	0.70121
YMR034C	20 - YMR034C ... YMR034C biological process unknown sterol transporter activity cellular component unknown | YMR035W	20	32	-0.00473	0.29441	-0.11476	0.41221	0.07478	0.32552	0.80627	0.819945	0.813495	0.887415	0.80259	0.800825	-0.046725	0.386635	0.074145	0.219295	0.35596	0.76729
YLR315W	20 - YLR315W ... NKP2 biological process unknown molecular function unknown spindle pole body* | YLR316C	20	32	0.38631	0.26164	0.37152	0.38466	0.48702	0.21126	0.89005	0.903625	1.10868	0.888875	0.8423	0.412425	0.425845	0.235685	0.161315	0.045925	0.41004	0.50765
YGL082W	20 - YGL082W ... YGL082W biological process unknown molecular function unknown cytoplasm* | YGL083W	20	32	0.60129	0.43403	0.53874	0.443	0.65189	0.68269	0.5715	0.806685	0.724475	0.703235	0.66016	0.687755	0.336505	0.260275	0.355235	0.405145	0.655	0.51376
YIL105C	20 - YIL105C ... SLM1 actin cytoskeleton organizatio phosphoinositide binding cytoplasm* | YIL105W-A	20	32	0.47832	0.51512	0.45085	0.51845	0.23571	0.65186	0.69506	0.810555	0.586785	0.994905	0.63097	0.809865	0.120815	0.253935	0.406085	0.248125	0.16066	0.32581
YOL065C	20 - YOL065C ... INP54 exocytosis* inositol-polyphosphate 5-phosphatasendoplasmic reticulum | YOL066C	20	32	0.3893	0.28654	0.36782	0.74031	0.51906	0.55423	0.95738	1.03825	0.818995	0.757905	0.59376	0.832155	0.192375	0.336455	0.324235	0.456475	0.1579	0.31288
YDR182W	20 - YDR182W ... CDC1 DNA repair* molecular function unknown integral to membrane | YDR182W-A	20	32	0.4762	0.32718	0.4842	0.63239	0.40845	0.46149	0.74233	0.934595	0.551035	0.811385	0.67717	0.759785	0.490375	0.615755	0.512755	0.516355	0.65168	0.42844
YPL084W	20 - YPL084W ... BRO1 ubiquitin-dependent protein ca intracellular transporter activity cytoplasm* | YPL085W	20	32	0.59973	0.54441	0.52463	0.47071	0.29091	0.45706	0.76339	0.983455	0.842875	0.809235	0.66842	0.772815	0.201605	0.612475	0.562425	0.439775	0.66627	0.52263
YOR002W	20 - YOR002W ... ALG6 protein amino acid glycosylati "transferase activity, transferring"endoplasmic reticulum | YOR003W	20	32	0.32596	0.41598	0.25857	0.42731	0.37651	0.18208	0.54502	0.885395	0.801315	0.428195	0.50877	0.660745	0.349405	0.585575	0.439425	0.593285	0.69336	0.69243
YIR003W	20 - YIR003W ˜ AIM21 biological process unknown molecular function unknown | Protein of unknown function; may interact with ribosomes; GFP-fusion protein colocalizes with Sac1p to the actin cytoskeleton; YIR003W is not an essential gene; null mutant displays elevated frequency of mitochondrial genome lossYIR004W	20	32	0.49064	0.41258	0.28905	0.21552	0.18571	0.52804	0.6864	0.610955	0.906255	0.908795	0.84701	0.701995	0.658965	0.453335	0.633425	0.094235	0.41404	0.5946
YMR086W	20 - YMR086W ... YMR086W biological process unknown molecular function unknown cytoplasm | YMR087W	20	32	0.18945	0.51283	0.4911	-0.04268	0.1841	0.36617	0.39241	0.423125	1.00934	0.911565	0.92679	0.866195	0.467155	0.543105	0.620675	0.484345	0.33834	0.35526
YBR036C	20 - YBR036C ... CSG2 calcium ion homeostasis* enzyme regulator activity integral to endoplasmic reticulum m | YBR037C	20	32	0.52298	0.7076	0.67607	0.76263	0.61052	0.20525	0.80288	0.775375	1.05261	0.717375	1.10178	0.833115	0.367125	0.301615	0.293885	0.246305	0.39068	0.5402
YNL093W	45 - YNL093W ... YPT53 endocytosis* GTPase activity late endosome | YNL094W	45	32	1.83858	2.44674	2.16729	2.26996	2.36949	2.34458	3.6207	3.16106	2.86775	3.79075	3.40609	3.42256	1.53527	1.40827	1.48423	1.75029	1.54252	1.67297
YMR206W	45 - YMR206W ... YMR206W biological process unknown molecular function unknown cellular component unknown | YMR207C	45	32	1.93926	2.34759	1.8326	2.0039	2.17142	1.96545	3.63943	3.56456	3.25895	3.94586	3.04723	3.61233	0.952045	1.2758	1.576	2.24954	1.20989	1.42628
YHR140W	45 - YHR140W ... YHR140W biological process unknown molecular function unknown integral to membrane | YHR141C	45	32	2.64906	2.97284	2.41129	2.84842	2.57512	2.93711	4.12455	4.06093	3.91484	4.1231	4.01362	3.72309	2.09002	2.40799	2.04515	2.10529	1.83208	1.92719
YBR117C	45 - YBR117C ... TKL2 pentose-phosphate shunt transketolase activity cytoplasm* | YBR118W	45	32	0.52656	1.23392	0.97032	0.98064	1.50226	1.58982	3.91099	4.19362	3.02598	4.10654	2.15834	3.83869	1.05303	2.37226	2.26812	2.94154	1.83335	2.62028
YLR053C	45 - YLR053C ... YLR053C biological process unknown molecular function unknown cellular component unknown | YLR054C	45	32	1.0532	1.88621	1.37391	1.55978	1.79158	2.00574	4.41496	4.4058	4.11568	4.49031	4.23756	4.58561	2.33539	2.04838	1.95172	1.87349	1.92547	2.40082
YMR081C	45 - YMR081C iESR cluster ISF1 aerobic respiration molecular function unknown cellular component unknown | YMR082C	45	32	1.12074	2.53491	1.54091	1.46236	1.91094	2.1035	4.48892	4.05811	3.46862	4.68595	3.52035	4.23977	2.10594	2.3031	2.1648	2.8232	2.26854	2.23558
YOR134W	45 - YOR134W ... BAG7 small GTPase mediated signal t signal transducer activity* intracellular | YOR135C	45	32	0.54313	0.67996	0.89877	0.72032	1.24321	1.59148	4.97334	4.95284	3.83934	5.15198	4.05217	4.91537	0.583675	1.12254	1.49788	3.07294	1.10624	1.97004
YLR205C	45 - YLR205C ... HMX1 iron ion homeostasis* heme binding* endoplasmic reticulum* | YLR206W	45	32	1.56223	1.71957	0.74435	1.10156	1.50286	1.85181	3.97046	2.80554	3.49634	4.28313	4.56585	3.99643	2.19766	1.69664	2.27644	0.573495	1.87227	2.03221
YJL163C	45 - YJL163C iESR cluster YJL163C biological process unknown molecular function unknown cellular component unknown | YJL164C	45	32	2.80074	2.36205	2.79667	2.75957	2.6128	2.86091	4.48419	4.52935	4.01849	4.78658	4.42738	4.39645	1.67807	2.14746	2.13041	2.18133	2.21132	2.46832
YHL024W	45 - YHL024W ... RIM4 meiosis* RNA binding cytoplasm | YHL025W	45	32	1.3769	2.20463	1.51236	1.78573	1.32101	1.55764	4.41554	3.9297	4.28338	4.40827	3.99311	4.3452	2.14841	2.37121	2.6793	2.60569	2.66966	2.40456
YBR183W	45 - YBR183W iESR cluster YPC1 ceramide metabolism ceramidase activity endoplasmic reticulum | YBR184W	45	32	2.70473	2.78659	2.8132	2.90342	2.5864	2.99235	4.29909	4.63922	4.3956	4.56726	4.0878	4.34664	2.1402	2.60969	2.72447	2.95648	2.4923	3.40615
YPL014W	45 - YPL014W ... YPL014W biological process unknown molecular function unknown cytoplasm* | YPL015C	45	32	2.12178	1.93623	2.29381	2.30049	2.01643	1.80696	3.63349	3.26916	3.43264	3.68635	3.74415	3.67359	2.04101	1.60213	2.16703	2.27554	2.34311	2.26076
YDR034W-B	45 - YDR034W-B ... YDR034W-B biological process unknown molecular function unknown cellular component unknown | YDR035W	45	32	2.45279	2.51012	2.70178	2.67242	2.32128	2.79493	3.98104	3.50664	3.34382	4.40097	4.03249	3.54992	1.74033	1.85804	2.0653	2.55628	2.10951	2.22425
YLR349W	45 - YLR349W ... | YLR350W	45	32	2.88335	2.72537	2.89433	3.18272	2.61793	2.28543	3.6855	3.08715	3.43018	3.35499	3.07736	3.79059	2.23398	1.83529	1.74341	2.23816	1.58537	1.66973
YIL101C	45 - YIL101C iESR cluster XBP1 response to stress transcription factor activity nucleus | YIL102C	45	32	2.04968	2.44707	2.28276	2.31563	2.31648	2.27852	4.04806	3.56678	3.09949	4.04627	3.50337	4.17955	1.60299	1.89281	1.76574	2.73401	1.82364	2.36587
YEL073C	45 - YEL073C ... YEL073C biological process unknown molecular function unknown cellular component unknown | YEL074W	45	32	2.38509	1.55767	2.10758	2.23527	2.69969	2.80014	3.12765	3.54536	3.3346	3.78437	3.17003	3.35238	1.39075	1.72538	1.4284	2.9211	1.90075	2.30913
YDL079C	45 - YDL079C ... MRK1 protein amino acid phosphoryla glycogen synthase kinase 3 activitycellular component unknown | YDL080C	45	32	2.05868	2.41351	1.8572	1.95653	2.06095	2.3247	3.43281	3.55042	3.50432	3.89913	3.37822	3.37981	1.99395	2.07823	2.42896	2.71358	2.25285	2.85142
YBR147W	45 - YBR147W ˜ RTC2 biological process unknown molecular function unknown | Protein of unknown function; identified in a screen for mutants with decreased levels of rDNA transcription; detected in highly purified mitochondria; null mutant suppresses cdc13-1; similar to a G-protein coupled receptor from S. pombeYBR148W	45	32	2.77924	2.66479	2.66377	2.72908	2.86082	3.14277	3.61778	3.327	2.78873	3.63264	3.43231	3.63503	1.83157	2.06981	2.32717	2.66017	2.20586	2.46572
YKL017C	30 - YKL017C ... HCS1 lagging strand elongation DNA helicase activity alpha DNA polymerase:primase comple | YKL018C-A	30	35	0.49362	0.60637	0.53177	0.47574	0.23508	0.78289	0.91878	0.968795	1.0577	1.26181	1.00465	1.09662	0.781795	0.950495	0.834045	0.794705	0.85361	0.35666
YDR107C	30 - YDR107C ˜ TMN2 biological process unknown molecular function unknown | Protein with a role in cellular adhesion and filamentous growth; similar to Emp70p and Tmn3p; member of the evolutionarily conserved Transmembrane Nine family of proteins with nine membrane-spanning segmentsYDR108W	30	35	0.48795	0.67884	0.4709	0.55964	0.54048	0.44224	1.23079	1.23933	1.00534	0.824185	1.03657	0.992705	0.672245	0.694555	0.769235	0.628515	1.06771	0.81279
YDR173C	30 - YDR173C ... ARG82 arginine metabolism* inositol or phosphatidylinositol kinucleus | YDR174W	30	35	0.51375	0.58516	0.56758	0.71198	0.58768	0.43383	0.95528	1.13614	0.898705	0.988015	0.88374	1.18656	0.512565	0.927475	0.738175	0.822735	0.7464	0.93407
YLL001W	30 - YLL001W ... DNM1 mitochondrion organization and GTPase activity mitochondrial outer membrane | YLL002W	30	35	0.5225	0.50381	0.41031	0.73682	0.5892	0.58833	0.84685	1.35177	0.666145	0.944045	0.79022	0.899905	0.698135	0.967165	0.872675	0.836705	1.14903	0.89449
YJR065C	30 - YJR065C ... ARP3 actin filament organization* structural constituent of cytoskeleArp2/3 protein complex | YJR066W	30	35	0.37502	0.41747	0.27386	0.44039	0.56543	0.65812	0.93262	1.39678	0.594995	0.799515	0.93199	1.16168	0.957315	0.959855	1.11818	0.968375	1.11183	1.12556
YGR223C	30 - YGR223C ... HSV2 biological process unknown phosphoinositide binding cytoplasm* | YGR224W	30	35	0.48854	0.48765	0.89756	0.6539	0.5183	0.49894	0.86499	0.832205	0.808255	0.911575	1.0113	0.956475	1.02087	1.14264	1.11085	1.05034	0.85209	1.04508
YOR132W	30 - YOR132W ... VPS17 retrograde transport, endosome molecular function unknown endosome* | YOR133W	30	35	0.80401	0.89384	0.82559	0.60166	0.59386	0.86296	0.79348	0.916275	0.788775	0.993545	0.77024	0.810465	1.15406	0.903235	1.09028	0.805175	1.04826	1.22398
YDL007W	30 - YDL007W ... RPT2 ubiquitin-dependent protein ca ATPase activity* nucleus* | YDL008W	30	35	0.78096	0.68695	0.71434	0.54965	0.72857	0.81851	0.66916	0.590575	0.910515	0.801065	1.07345	1.01754	1.27442	1.16013	1.16999	0.656005	1.26535	1.07976
YMR302C	30 - YMR302C ˜ iESR cluster YME2 rRNA processing* exonuclease activity mitochondrial inner membrane | Integral inner mitochondrial membrane protein with a role in maintaining mitochondrial nucleoid structure and number; mutants exhibit an increased rate of mitochondrial DNA escape; shows some sequence similarity to exonucleasesYMR303C	30	35	0.69508	0.56774	0.69857	0.52579	0.61006	0.64746	0.74897	1.03931	0.950425	1.15375	0.85863	1.01588	0.781385	0.936565	0.869695	0.674775	0.92203	0.79639
YCR068W	30 - YCR068W ... ATG15 autophagy* lipase activity integral to membrane* | YCR069W	30	35	0.66997	0.47382	0.72437	0.61496	0.78265	0.52569	0.93823	1.03188	0.805255	1.21659	1.12602	1.15097	0.671025	0.755155	0.930725	0.742105	1.01448	1.06009
YBL017C	30 - YBL017C ... PEP1 protein-vacuolar targeting* signal sequence binding Golgi apparatus | YBL018C	30	35	0.39076	0.63796	0.43579	0.54343	0.6058	0.69801	1.03877	1.4667	1.06217	0.841755	0.99828	1.15427	0.756205	0.963835	0.784855	0.575755	1.03773	0.93605
YOR124C	30 - YOR124C ... UBP2 protein deubiquitination ubiquitin-specific protease activitcytoplasm | YOR125C	30	35	0.49393	0.44315	0.35595	0.3375	0.39827	0.68394	1.00858	1.18168	0.974605	1.00501	0.95482	1.16677	0.916305	1.10753	1.21792	0.952545	1.25683	1.20504
YLR225C	30 - YLR225C ... YLR225C biological process unknown molecular function unknown cytoplasm | YLR226W	30	35	0.50372	0.49217	0.57433	0.70903	0.44225	0.63793	0.79886	1.11562	0.736705	0.982905	0.9442	1.08658	1.00469	1.07215	0.972215	0.925965	0.75076	0.8508
YGR086C	30 - YGR086C ... PIL1 response to heat protein kinase inhibitor activity cytoplasm* | YGR087C	30	35	0.48593	0.39535	0.46972	0.42549	0.43772	0.43262	1.10861	1.29845	0.836415	1.21845	0.91859	1.22999	0.832985	1.04994	1.03417	0.583695	1.15556	1.2174
YBL058W	30 - YBL058W ... SHP1 sporulation (sensu Fungi)* molecular function unknown cytoplasm* | YBL059C-A	30	35	0.33124	0.48441	0.61869	0.50296	0.52803	0.5023	0.88892	1.05686	0.857775	0.656335	0.96541	1.13803	1.19599	1.22778	1.31428	0.658155	1.28866	1.2956
YKR003W	30 - YKR003W ... OSH6 steroid biosynthesis oxysterol binding cellular component unknown | YKR004C	30	35	0.6806	0.29441	0.52221	0.58304	0.63018	0.7102	1.0483	1.13556	0.969105	1.08743	0.89634	1.08554	1.25168	0.833835	0.793135	0.806225	0.87693	0.91985
YLR128W	30 - YLR128W ... DCN1 biological process unknown molecular function unknown cellular component unknown | YLR129W	30	35	0.42432	0.75875	0.53078	0.46036	0.40116	0.80167	0.91963	1.04873	0.665995	1.36058	0.99248	0.731115	0.678675	0.814545	0.873355	0.825595	0.84758	0.99062
YOL088C	30 - YOL088C ... MPD2 protein folding protein disulfide isomerase activitendoplasmic reticulum | YOL089C	30	35	0.34979	0.71256	0.24813	0.74407	0.25954	0.67749	0.87267	1.30314	0.900925	1.15626	0.82311	0.735325	0.801445	0.858045	1.05096	0.704825	0.94511	1.00051
YER021W	30 - YER021W ... RPN3 ubiquitin-dependent protein ca molecular function unknown "proteasome regulatory particle, lid" | YER022W	30	35	0.75153	0.32093	0.55049	0.42054	0.33558	0.50452	0.93125	1.02449	0.547105	0.752905	0.71661	0.844255	0.961955	1.02418	1.02146	0.714835	0.99565	0.82654
YJL154C	30 - YJL154C ... VPS35 protein-Golgi retention* molecular function unknown endosome* | YJL155C	30	35	0.46496	0.3963	0.42681	0.51562	0.39802	0.62333	0.94979	1.35796	0.601175	0.631915	0.6784	0.841375	0.671955	1.01195	1.01347	0.809355	1.03825	0.97588
YIL075C	30 - YIL075C ... RPN2 ubiquitin-dependent protein ca endopeptidase activity* nucleus* | YIL076W	30	35	0.37144	0.50043	0.57888	0.5203	0.31411	0.59189	0.68976	1.1085	0.933455	0.554235	0.7605	0.812055	0.912275	1.03296	0.992265	0.855995	1.16653	0.96409
YBR114W	30 - YBR114W ... RAD16 nucleotide-excision repair, DN DNA-dependent ATPase activity repairosome* | YBR115C	30	35	0.54863	0.483	0.74541	0.6218	0.5802	0.99895	1.0492	1.2142	0.998515	1.09919	1.0367	1.02746	1.00154	1.40745	1.1588	0.859485	1.0716	1.18419
YER136W	30 - YER136W ... GDI1 vesicle-mediated transport Rab GDP-dissociation inhibitor actimembrane fraction* | YER137C	30	35	0.85466	0.70809	0.52905	0.66517	0.5872	0.61488	1.06907	1.36092	1.0091	1.2243	0.78926	1.23331	1.26777	1.20375	1.32595	0.984365	1.091	0.90282
YDR129C	30 - YDR129C ... SAC6 endocytosis* "protein binding, bridging*" actin cortical patch* | YDR130C	30	35	0.64514	0.48136	0.56001	0.55871	0.63612	0.75196	1.20985	1.53446	0.873965	1.07673	1.08685	1.40901	0.933835	1.35353	1.08126	0.952865	1.39284	1.20515
YDR293C	30 - YDR293C ... SSD1 cell wall organization and bio RNA binding cytoplasm | YDR294C	30	35	0.64404	0.63754	0.51932	0.48614	0.6715	0.63051	0.9679	1.03411	0.887425	1.03974	0.86358	1.10126	1.10501	1.11367	1.21294	1.01961	1.03336	1.21032
YOR087W	30 - YOR087W ... YVC1 cation homeostasis calcium channel activity* vacuole (sensu Fungi) | YOR089C	30	35	0.41242	0.55641	0.48364	0.75645	0.62697	0.5013	0.93228	1.25587	0.945715	0.747595	0.95979	0.911425	0.989325	1.31146	1.1666	1.1737	1.28557	1.42051
YBR170C	30 - YBR170C ... NPL4 ER-associated protein cataboli molecular function unknown endoplasmic reticulum* | YBR171W	30	35	0.87819	0.48981	0.7861	0.75226	0.73626	0.74415	1.26237	1.29553	0.904145	1.11257	0.96207	1.1497	0.786145	1.00185	1.14498	0.996905	1.28701	1.37341
YGL197W	30 - YGL197W ... MDS3 negative regulation of sporula molecular function unknown cytoplasm* | YGL198W	30	35	0.80778	0.62018	0.91053	0.45159	0.89227	0.90005	1.03019	1.08211	0.926005	1.01005	1.01158	1.21745	1.07686	1.14411	1.26106	0.890445	1.21528	1.29411
YDR148C	30 - YDR148C ... KGD2 tricarboxylic acid cycle* dihydrolipoyllysine-residue succinymitochondrial matrix* | YDR149C	30	35	0.7904	0.58213	0.74488	0.68902	0.96617	0.57317	1.16163	1.38132	0.867595	1.14577	0.93783	1.15484	0.890555	0.878555	0.885175	0.895965	0.93894	0.92971
YDL029W	30 - YDL029W ... ARP2 actin filament organization* structural constituent of cytoskelemitochondrion* | YDL030W	30	35	0.63965	0.75083	0.58817	0.62687	0.91984	0.66626	1.14148	1.45232	0.948605	0.736175	1.00421	1.18762	0.829965	0.996785	0.936405	0.734545	1.02336	0.76116
YBR059C	30 - YBR059C ... AKL1 actin cytoskeleton organizatio protein kinase activity cytoplasm* | YBR060C	30	35	0.4885	0.68355	0.78672	0.44192	0.59178	0.74779	1.058	1.28699	1.1761	1.07218	1.16189	1.23765	1.0569	1.05171	1.21313	0.800935	1.14683	1.16452
YDR099W	30 - YDR099W ... BMH2 sporulation (sensu Fungi)* protein binding* nucleus | YDR100W	30	35	0.70631	0.52911	0.54107	0.46635	0.60397	0.78888	1.1674	1.01914	1.009	1.25999	1.08551	0.986365	1.0993	1.03985	1.07732	0.886635	0.9629	1.09224
YCR004C	30 - YCR004C iESR cluster YCP4 biological process unknown electron transporter activity cytoplasm* | YCR005C	30	35	0.58539	0.18941	0.22887	0.41025	0.7783	0.30866	1.32169	1.46355	0.830695	1.1768	1.19193	1.43067	1.00527	1.12928	1.25511	0.955845	1.52185	1.20785
YBL047C	30 - YBL047C ... EDE1 endocytosis molecular function unknown bud neck* | YBL048W	30	35	0.25747	0.43685	0.39504	0.19872	0.3005	0.54476	1.28976	1.1724	1.27343	1.32713	1.32741	1.39019	1.1261	0.909625	1.05736	0.778785	1.23709	1.13688
YOR086C	30 - YOR086C ... TCB1 biological process unknown lipid binding mitochondrion | YOR087W	30	35	0.20421	0.4165	0.38278	0.27496	0.4412	0.64548	1.07224	1.42353	1.0735	1.12519	1.13533	1.28151	0.992215	1.2369	1.09935	0.960085	1.25921	1.34111
YER004W	30 - YER004W ... FMP52 biological process unknown molecular function unknown mitochondrion* | YER005W	30	35	0.55654	0.42928	1.01628	0.64369	0.94179	0.61305	1.15382	1.15602	1.04964	0.879475	1.34563	0.787375	1.2085	0.756095	1.23798	0.971275	1.25489	1.28076
YOR142W	30 - YOR142W ... LSC1 tricarboxylic acid cycle* succinate-CoA ligase (ADP-forming) mitochondrion* | YOR143C	30	35	0.69794	0.45921	0.93598	0.74179	0.87078	0.3801	1.12337	1.07872	0.944785	1.14119	1.47188	1.05271	0.827005	0.920385	1.00303	0.641865	1.36537	0.91952
YGR174C	30 - YGR174C ... CBP4 protein complex assembly molecular function unknown mitochondrial membrane | YGR174W-A	30	35	0.58143	0.39863	0.62012	0.47235	0.61551	0.16778	1.27679	1.03499	1.1017	0.838845	1.67601	0.912465	0.943895	0.727175	1.06488	0.898765	1.21457	0.9068
YOR227W	31 - YOR227W ˜ HER1 biological process unknown molecular function unknown | Protein of unknown function required for proliferation or remodeling of the ER that is caused by overexpression of Hmg2p; may interact with ribosomes, based on co-purification experimentsYOR228C	31	35	1.22793	1.20674	1.03855	1.10567	1.38451	1.22954	1.70889	2.27367	1.58654	1.74781	1.62825	1.99215	2.01105	2.18429	2.22063	1.68857	2.17002	2.43014
YMR278W	31 - YMR278W ˜ PGM3 biological process unknown molecular function unknown | Phosphoglucomutase, catalyzes interconversion of glucose-1-phosphate and glucose-6-phospate; transcription induced in response to stress; green fluorescent protein (GFP)-fusion protein localizes to the cytoplasm and nucleus; non-essentialYMR279C	31	35	1.41222	1.15408	1.43408	1.23343	1.61889	1.36417	1.82418	2.25042	1.59681	1.76835	1.65817	1.8539	1.51798	1.9645	1.98767	1.66941	1.99409	2.35796
YML004C	31 - YML004C iESR cluster GLO1 glutathione metabolism lactoylglutathione lyase activity cytoplasm* | YML005W	31	35	1.17916	1.01419	1.22805	1.09021	1.22287	1.2855	1.56591	2.36143	1.66643	1.83855	1.82062	1.92674	1.45426	1.83126	1.99545	1.68399	1.68327	2.10803
YBL101C	31 - YBL101C ... ECM21 cell wall organization and bio molecular function unknown cytoplasm | YBL102W	31	35	1.2008	0.95939	1.01064	0.8105	1.23057	1.00603	1.62708	1.7105	1.27398	1.74314	1.43187	1.80753	1.33203	1.6663	1.69318	1.29733	1.69671	1.82969
YDR122W	31 - YDR122W ... KIN1 exocytosis protein kinase activity plasma membrane* | YDR123C	31	35	1.17539	0.96486	1.208	0.8685	1.21297	1.20797	1.58546	1.51141	1.53805	1.69226	1.5857	1.76052	1.64702	1.56831	1.74717	1.31093	1.78987	1.8474
YFL042C	31 - YFL042C ... YFL042C biological process unknown molecular function unknown cellular component unknown | YFL044C	31	35	1.43995	1.08318	1.22897	1.19487	1.23725	1.35063	1.6352	1.72114	1.34522	1.77344	1.43013	1.5447	1.63994	1.83126	1.75463	1.46209	1.68115	2.03424
YGL180W	31 - YGL180W iESR cluster ATG1 autophagy protein serine/threonine kinase actcytosol | YGL181W	31	35	1.66015	1.60082	1.56231	1.41644	1.28476	1.54755	1.60296	1.60057	1.52269	1.77502	1.50871	1.62055	1.88478	2.15191	2.0698	1.60576	2.00333	1.91738
YOR155C	31 - YOR155C ... ISN1 inosine salvage IMP 5'-nucleotidase activity cellular component unknown | YOR156C	31	35	1.39063	1.24707	1.48997	1.3074	1.53976	1.32735	1.96988	2.06936	1.58041	1.66368	1.87436	1.71812	1.79771	2.0427	2.29505	1.69298	2.29397	2.11229
YDR490C	31 - YDR490C ... PKH1 protein amino acid phosphoryla protein kinase activity cytosol | YDR491C	31	35	1.29975	0.71452	1.21444	0.99618	1.40676	1.08251	1.67643	1.66037	1.27344	1.43112	1.40239	1.5178	1.4199	1.4603	1.60288	1.18474	1.37599	1.74028
YMR304W	31 - YMR304W iESR cluster UBP15 protein deubiquitination ubiquitin-specific protease activitcytoplasm | YMR305C	31	35	1.46016	1.22741	1.35666	1.32257	1.33461	1.45062	1.85516	2.19563	1.90011	1.98998	1.83294	1.94094	1.62193	1.84858	1.76605	1.65112	1.93862	1.78806
YDR032C	31 - YDR032C iESR cluster PST2 biological process unknown molecular function unknown cytoplasm* | YDR033W	31	35	0.89582	0.97974	1.16412	0.91562	1.19247	0.95711	1.93345	1.94596	1.59096	1.7456	1.99662	1.9463	1.59684	1.46593	1.64139	1.54686	1.91245	1.84864
YKL129C	31 - YKL129C ... MYO3 cell wall organization and bio microfilament motor activity actin cortical patch | YKL130C	31	35	1.17204	1.13297	1.12962	0.87098	1.04682	1.26096	1.8031	1.70975	1.84435	2.03826	1.8268	1.7531	1.8601	2.12643	2.06562	1.7223	1.88609	2.11819
YHR028C	31 - YHR028C ... DAP2 protein processing dipeptidyl-peptidase and tripeptidyvacuolar membrane (sensu Fungi) | YHR028W-A	31	35	0.64969	0.62261	0.77315	0.84799	0.92337	0.69861	1.60666	1.84919	1.64257	1.66924	1.5466	1.70575	1.27056	1.84899	1.55977	1.52851	1.78526	1.86344
YML059C	31 - YML059C ... NTE1 phosphatidylcholine metabolism hydrolase activity* endoplasmic reticulum | YML060W	31	35	0.64939	0.67142	0.64646	0.8035	0.98239	0.77898	1.65374	1.71592	1.46731	1.53232	1.62495	1.5116	1.54286	1.68776	1.74967	1.68622	1.74665	1.9285
YMR297W	31 - YMR297W iESR cluster PRC1 vacuolar protein catabolism carboxypeptidase C activity cytoplasm* | YMR298W	31	35	0.77226	0.80514	0.97771	0.84622	1.06453	0.91764	1.77319	2.3769	1.75179	1.95453	2.12055	1.78981	1.27354	1.21901	1.4447	1.36386	1.66868	1.65223
YCL043C	31 - YCL043C ... PDI1 protein folding protein disulfide isomerase activitendoplasmic reticulum lumen | YCL044C	31	35	0.72022	0.85626	0.96424	0.88338	1.36825	0.50913	1.59456	1.61408	1.69569	1.72663	1.95928	1.34895	1.67959	1.65663	1.7651	1.23968	1.78697	1.44478
YDR518W	31 - YDR518W ... EUG1 protein folding protein disulfide isomerase activitendoplasmic reticulum | YDR519W	31	35	1.13259	1.2774	1.18821	1.61406	1.46935	1.39644	1.55148	1.87698	1.84127	1.61115	1.4894	1.72653	1.60357	1.89166	1.85972	1.78211	1.54805	1.77027
YDL149W	31 - YDL149W ... ATG9 protein-vacuolar targeting* molecular function unknown cytoplasm* | YDL150W	31	35	1.31997	1.32938	1.33056	1.25096	1.47221	1.84796	1.80095	2.11369	1.53113	2.24999	1.87372	1.83004	1.90121	2.13903	1.94029	1.56085	2.06729	2.03019
YKL085W	31 - YKL085W ... MDH1 tricarboxylic acid cycle* L-malate dehydrogenase activity mitochondrial matrix | YKL086W	31	35	1.407	1.00417	1.31587	1.21521	1.30189	1.23537	2.02668	1.7343	1.52405	1.49541	1.72294	1.94734	1.8981	1.41012	1.83519	1.44575	1.52069	1.7562
YHR075C	31 - YHR075C ... PPE1 protein biosynthesis* structural constituent of ribosome*mitochondrial small ribosomal subun | YHR076W	31	35	1.38731	1.28712	1.10982	1.29919	1.51066	1.68219	1.98023	2.16219	1.59746	2.41831	2.06318	1.90531	1.57549	1.80147	1.53198	1.30353	1.82367	1.72535
YCL039W	31 - YCL039W ... GID7 negative regulation of glucone molecular function unknown cytoplasm* | YCL040W	31	35	1.32542	1.10608	1.35262	0.95669	1.28538	1.18147	1.99996	1.91156	1.86915	1.84255	1.95209	1.68345	1.42616	1.61869	1.41162	1.56663	1.54264	2.0335
YIL124W	31 - YIL124W iESR cluster AYR1 phosphatidic acid biosynthesis acylglycerone-phosphate reductase acytoplasm* | YIL125W	31	35	1.0211	1.03279	1.15456	1.11438	1.60071	1.39693	1.53257	2.09477	1.51649	1.6307	1.57341	1.7675	1.47677	1.67788	1.71276	1.39952	1.78179	1.385
YLR133W	31 - YLR133W ... CKI1 phosphatidylcholine biosynthes choline kinase activity cytosol | YLR134W	31	35	1.50065	1.29301	1.33584	1.24244	1.53519	1.57509	1.77578	2.04576	1.54303	1.81011	1.66313	2.02968	1.48914	1.76069	2.03147	1.60603	1.8647	1.61351
YOL096C	31 - YOL096C ... COQ3 ubiquinone metabolism* hexaprenyldihydroxybenzoate methyltmitochondrion* | YOL097C	31	35	1.25176	1.24142	1.08238	1.19091	1.58593	1.36286	1.75819	1.84102	1.56496	1.37565	1.81492	1.79611	1.45059	1.73367	1.6378	1.58343	1.49516	1.41726
YDL194W	31 - YDL194W ... SNF3 signal transduction* receptor activity* plasma membrane | YDL195W	31	35	1.12089	0.9873	1.29393	1.214	1.21515	1.3618	1.79731	2.28419	1.87115	1.98864	1.62856	1.624	1.64875	1.90559	1.82282	1.87464	2.15544	1.93285
YGR097W	31 - YGR097W ... ASK10 response to oxidative stress* transcription regulator activity cytoplasm* | YGR098C	31	35	1.32821	1.22483	1.34648	1.03201	1.21761	1.06381	1.89211	1.94755	2.1376	1.84584	1.56533	2.03434	2.03783	1.96131	2.14425	1.55124	1.82206	1.99929
YBR046C	31 - YBR046C ... ZTA1 biological process unknown molecular function unknown cytoplasm* | YBR047W	31	35	1.26236	0.8651	1.15298	1.16227	1.33794	1.13269	1.89582	2.17483	1.6202	2.20085	2.3428	2.15633	1.92373	1.8679	1.95602	1.83668	2.24265	2.29878
YOR020W-A	31 - YOR020W-A ... YOR020W-A biological process unknown molecular function unknown cellular component unknown | YOR021C	31	35	1.32389	0.83418	1.20187	0.96326	1.24409	1.05362	1.74412	1.67439	1.78099	2.02427	2.01707	1.8175	1.92782	1.70958	1.75713	1.3114	1.58978	2.02504
YIR038C	31 - YIR038C iESR cluster GTT1 glutathione metabolism glutathione transferase activity mitochondrion* | YIR039C	31	35	0.97017	0.82546	1.35921	0.9575	1.58874	0.81355	1.94636	1.83979	1.62356	1.8237	2.00019	1.95378	1.53893	1.72486	1.79032	1.48181	2.07087	2.03385
YAL056W	31 - YAL056W ... GPB2 signal transduction signal transducer activity cytoplasm* | YAL058W	31	35	0.6869	0.87236	0.90781	0.79376	0.94869	0.72955	1.88296	2.28272	1.91657	1.85844	1.55708	1.92129	1.28465	1.92362	1.80776	1.4504	2.03651	1.84929
YOR321W	31 - YOR321W ... PMT3 O-linked glycosylation dolichyl-phosphate-mannose-protein endoplasmic reticulum | YOR322C	31	35	0.87781	1.02785	0.67246	1.09303	0.91284	0.72136	1.8892	2.00831	2.00215	1.63936	1.66057	1.80682	1.61923	1.89875	1.68846	1.69327	1.83852	2.09475
YBR026C	31 - YBR026C iESR cluster ETR1 aerobic respiration* enoyl-[acyl-carrier protein] reductmitochondrion | YBR027C	31	35	0.97976	0.80948	0.92612	0.6675	1.32949	1.03497	2.16076	2.33675	1.98924	2.02507	1.85796	2.23204	1.36543	1.69375	1.43365	1.292	1.6465	2.00573
YOR120W	31 - YOR120W ... GCY1 response to salt stress* aldo-keto reductase activity cytoplasm* | YOR121C	31	35	0.85107	1.05692	0.81133	0.91399	1.20514	1.15684	2.2956	2.4796	1.6629	1.84984	1.94226	2.13799	1.0194	1.76809	1.81408	1.79506	1.84247	1.84672
YNL055C	31 - YNL055C iESR cluster POR1 aerobic respiration* voltage-gated ion-selective channelmitochondrial outer membrane | YNL056W	31	35	0.59577	0.75967	1.03345	0.69217	1.10374	0.51493	2.11866	1.90749	2.00806	2.09679	2.34196	1.74852	1.25801	1.15908	1.4363	1.18607	1.56129	1.38513
YKR009C	31 - YKR009C iESR cluster FOX2 fatty acid beta-oxidation 3-hydroxyacyl-CoA dehydrogenase actperoxisomal matrix | YKR010C	31	35	0.95442	0.62733	1.32351	1.10542	1.04612	0.77027	2.11641	2.2984	1.85586	2.72775	1.33958	2.08318	1.18274	1.79282	1.58739	1.85926	1.21125	1.58001
YNL208W	31 - YNL208W iESR cluster YNL208W biological process unknown molecular function unknown mitochondrion | YNL209W	31	35	0.61934	0.69276	0.699	0.7206	0.8878	0.7949	1.69597	1.50954	1.23768	1.69128	1.90408	1.7487	1.51477	1.26001	1.52907	0.985155	1.78096	1.52732
YER142C	33 - YER142C iESR cluster MAG1 DNA dealkylation alkylbase DNA N-glycosylase activitnucleus | YER143W	33	35	1.89072	1.35838	1.9629	1.57345	1.80807	1.93904	2.59339	1.95649	1.95907	2.60109	2.72421	2.34524	3.08293	3.37541	3.28731	2.96818	2.97357	3.37044
YJL079C	33 - YJL079C ... PRY1 biological process unknown molecular function unknown endoplasmic reticulum* | YJL080C	33	35	1.22411	1.51951	1.06507	1.32381	1.35389	1.18985	2.17325	2.02612	2.32886	2.01238	2.20116	1.96985	2.84623	2.83195	2.76469	2.7016	2.62944	2.95432
YMR291W	33 - YMR291W iESR cluster YMR291W biological process unknown protein kinase activity cytoplasm* | YMR292W	33	35	1.51034	1.60574	1.64573	1.782	1.51471	1.56602	2.7305	2.65736	2.03886	2.46373	2.40862	2.55404	2.53164	2.67455	3.12477	2.83515	3.0767	3.32569
YDL085W	33 - YDL085W ... NDE2 ethanol fermentation* NADH dehydrogenase activity mitochondrion | YDL086W	33	35	1.63745	2.23074	1.70691	1.99178	2.34573	2.15527	2.89853	3.07416	2.2862	3.10387	2.4775	3.08902	2.28256	2.65	2.41129	3.08276	2.60151	2.84681
YEL041W	33 - YEL041W ˜ YEF1 biological process unknown molecular function unknown | ATP-NADH kinase; phosphorylates both NAD and NADH; homooctameric structure consisting of 60-kDa subunits; sequence similarity to Utr1p and Pos5p; overexpression complements certain pos5 phenotypesYEL042W	33	35	1.61146	1.38055	1.44695	1.7532	1.62348	1.8465	2.15424	2.22623	1.82723	2.58921	2.30156	2.79078	2.08914	2.63779	2.42582	2.63745	2.31798	2.90864
YHR043C	33 - YHR043C ... DOG2 response to stress* 2-deoxyglucose-6-phosphatase activicytoplasm* | YHR044C	33	35	1.96363	2.08926	1.8263	2.13956	2.20816	2.01289	2.52854	2.39599	2.31602	2.10914	2.3047	2.29361	2.53437	2.77394	2.83739	2.31207	2.94523	2.57495
YHR171W	33 - YHR171W iESR cluster ATG7 protein-vacuolar targeting* ubiquitin-like conjugating enzyme acytoplasm* | YHR172W	33	35	2.22871	1.96948	2.00289	2.2054	2.06242	2.36483	2.50998	2.5227	1.94254	2.71304	2.1925	2.45538	2.45289	2.782	2.8759	2.15742	2.80582	3.01086
YOL082W	33 - YOL082W iESR cluster ATG19 protein-vacuolar targeting protein binding cytoplasm* | YOL083W	33	35	2.32441	2.13413	2.01548	1.87747	2.36032	2.36093	2.3741	2.35048	2.09871	2.68941	2.31117	2.37831	3.09706	2.97316	3.40772	2.68228	3.16329	3.15605
YGL062W	33 - YGL062W ... PYC1 gluconeogenesis* pyruvate carboxylase activity cytosol | YGL063W	33	35	1.85288	1.59868	1.64259	1.66584	2.10925	1.40871	2.43429	2.66127	2.39358	2.08767	2.6858	2.60922	2.58991	2.78972	2.72478	2.60812	2.9383	2.70774
YBL015W	33 - YBL015W ... ACH1 acetate metabolism* acetyl-CoA hydrolase activity mitochondrion* | YBL016W	33	35	1.77437	1.44864	1.91939	1.61202	1.8465	1.36429	2.37195	2.33442	1.97568	2.18571	2.14959	2.23083	2.57414	2.58469	2.81038	2.50779	3.02023	2.69462
YJL132W	33 - YJL132W iESR cluster YJL132W biological process unknown molecular function unknown membrane fraction | YJL133C-A	33	35	1.75968	1.63089	1.41763	1.7441	1.79128	2.16472	2.58553	2.63881	2.08391	2.66478	2.26109	2.4668	2.54771	2.96482	2.78487	3.06996	3.11177	2.77274
YKR076W	33 - YKR076W iESR cluster ECM4 cell wall organization and bio molecular function unknown cytoplasm | YKR077W	33	35	2.02922	2.07447	1.45067	1.63777	1.92737	2.3839	3.09487	2.89423	2.20944	3.55692	3.00242	2.83888	2.86577	3.1463	3.03918	2.39439	3.13607	3.25723
YIR007W	33 - YIR007W ... YIR007W biological process unknown molecular function unknown cytoplasm | YIR008C	33	35	1.82984	1.61802	1.86201	1.73223	1.99024	2.08919	2.9313	3.05422	2.53092	3.16398	2.54489	3.0627	2.52148	3.01121	2.66466	2.41357	2.70673	2.90531
YGR255C	33 - YGR255C ... COQ6 ubiquinone metabolism ubiquinone biosynthesis monooxygenamitochondrion* | YGR256W	33	35	1.87552	2.03407	2.05658	2.19236	2.15639	1.94109	2.73656	2.6336	2.56837	2.57934	2.78822	2.57951	2.61414	2.70104	2.91809	2.62782	2.90491	2.75016
YGL229C	33 - YGL229C ... SAP4 G1/S transition of mitotic cel protein serine/threonine phosphatascytoplasm* | YGL230C	33	35	1.63738	1.67906	1.71939	1.67263	1.57219	1.79501	2.4935	2.6509	2.4784	2.6109	2.29056	2.35957	1.96647	2.56171	2.36926	2.19266	2.59897	2.59312
YDR453C	33 - YDR453C iESR cluster TSA2 regulation of cell redox homeo thioredoxin peroxidase activity nucleus | YDR454C	33	35	1.40564	1.23546	1.03309	1.27126	1.84691	1.7169	2.60518	2.413	1.69707	2.63991	2.54353	2.71959	2.19474	2.67265	2.57691	2.34227	2.93922	2.73301
YDR506C	33 - YDR506C ... YDR506C biological process unknown molecular function unknown cellular component unknown | YDR507C	33	35	1.53987	1.41785	1.42696	1.36146	1.43289	1.74219	2.57847	2.61789	2.44615	3.11871	2.57179	3.01494	2.33801	2.91345	2.81926	2.90437	2.60779	2.75928
YPL004C	33 - YPL004C iESR cluster LSP1 response to heat protein kinase inhibitor activity cytoplasm* | YPL005W	33	35	1.53297	1.70214	1.81222	1.56917	2.05575	1.51195	2.87193	3.53937	2.68192	3.02395	2.98573	2.96742	2.29936	2.8014	2.79587	2.15365	2.8094	2.86396
YMR315W	33 - YMR315W iESR cluster YMR315W biological process unknown molecular function unknown cytoplasm* | YMR315W-A	33	35	1.54463	1.31122	1.72914	1.39948	1.7253	1.54397	2.58537	2.68766	2.4072	2.55495	2.92728	2.55172	2.30092	2.58462	2.43148	2.16032	2.53708	2.50092
YIL155C	33 - YIL155C ... GUT2 carbohydrate metabolism* glycerol-3-phosphate dehydrogenase mitochondrion | YIL156W	33	35	1.46387	1.31622	1.54532	1.25182	1.82561	1.35561	2.95777	2.63842	2.82495	2.78166	3.18401	2.78224	2.15128	1.86153	2.4824	2.16694	2.49518	3.05683
YPR030W	33 - YPR030W ... CSR2 cell wall organization and bio molecular function unknown nucleus | YPR031W	33	35	1.7529	1.74912	1.22763	1.63148	1.63491	2.10914	3.23531	2.91574	2.00086	3.15168	2.64523	3.09863	2.38248	2.33828	2.56201	3.13175	2.52087	3.01655
YBR001C	33 - YBR001C ... NTH2 response to stress* "alpha,alpha-trehalase activity" cytoplasm* | YBR002C	33	35	1.39354	1.40145	1.46956	1.3611	1.56645	1.18272	3.19021	3.62534	2.69179	3.38693	2.64948	3.0968	2.04412	2.51684	2.38288	2.34523	2.44693	2.59172
YOR152C	33 - YOR152C iESR cluster YOR152C biological process unknown molecular function unknown membrane fraction | YOR153W	33	35	1.00768	1.87064	1.198	1.55821	1.31001	1.82932	3.13419	3.16893	2.97905	3.00319	2.74569	2.92537	1.81282	2.6398	2.30143	2.31418	2.64807	2.51511
YKL093W	33 - YKL093W iESR cluster MBR1 aerobic respiration molecular function unknown cellular component unknown | YKL094W	33	35	1.12374	1.42246	0.94301	1.40881	1.37005	1.72334	3.22441	3.05601	2.49314	3.35213	2.86145	3.16858	2.26891	2.35987	2.36726	2.4889	2.70532	2.84476
YKR049C	33 - YKR049C iESR cluster FMP46 biological process unknown molecular function unknown mitochondrion | YKR050W	33	35	0.63916	0.7148	1.17234	0.70496	1.5433	1.01815	3.13292	2.66053	3.03349	3.02488	3.3397	2.79468	2.02195	2.07123	2.30803	1.71904	2.51114	2.66144
YJL153C	33 - YJL153C ... INO1 myo-inositol metabolism inositol-3-phosphate synthase activcytoplasm | YJL154C	33	35	1.09444	1.48974	1.42212	1.83688	1.18255	1.66617	2.25546	2.07918	1.80419	2.75063	1.96482	2.16248	2.63247	2.93356	2.96251	2.32641	3.07339	3.58301
YMR170C	33 - YMR170C iESR cluster ALD2 aldehyde metabolism* aldehyde dehydrogenase activity cytoplasm | YMR171C	33	35	1.36119	1.22887	1.21035	1.461	2.03421	1.63801	3.06194	3.55335	2.49947	3.4184	1.69005	2.46902	2.3813	3.54946	3.71801	3.39052	3.53873	3.20662
YGR295C	33 - YGR295C ... COS6 biological process unknown molecular function unknown vacuole (sensu Fungi) | YGR296C-A	33	35	1.58897	1.47596	1.61458	1.70952	1.66974	1.51824	2.88452	2.89105	3.37845	2.46341	2.50657	2.34939	2.1034	2.31507	2.58014	2.18064	2.66167	2.21311
YKL086W	33 - YKL086W ... SRX1 response to oxidative stress "oxidoreductase activity, acting on"cytoplasm* | YKL087C	33	35	1.87979	1.55911	1.42337	1.35077	2.3615	1.70924	3.15483	2.28444	2.1976	2.9207	3.21075	2.85	3.10945	2.87848	2.73974	2.79079	3.56219	3.38245
YNL237W	33 - YNL237W ... YTP1 biological process unknown molecular function unknown membrane | YNL238W	33	35	1.30001	1.64865	1.25259	1.30884	1.45327	1.57594	3.54293	2.72316	2.61269	3.48298	3.5158	3.04029	3.03425	3.22053	3.14972	1.84465	3.03261	3.43111
YGR204C-A	33 - YGR204C-A ... YGR204C-A biological process unknown molecular function unknown cellular component unknown | YGR204W	33	35	0.64153	2.12702	0.64395	1.63494	1.4022	1.20743	3.33727	2.74703	2.58067	3.09978	3.23772	3.01085	2.03871	2.39908	2.07184	3.82177	2.47208	3.28058
YHR007C-A	33 - YHR007C-A ... YHR007C-A biological process unknown molecular function unknown cellular component unknown | YHR008C	33	35	0.7426	0.69633	1.1113	1.21745	1.48731	0.60378	2.73728	2.57719	2.10255	2.31181	2.60421	3.00016	2.38906	2.72056	2.6206	2.99362	2.58092	3.25774
YOR186W	33 - YOR186W ... YOR186W biological process unknown molecular function unknown cellular component unknown | YOR187W	33	35	1.54908	2.19517	1.4423	1.77375	2.07812	1.4602	2.71166	2.31139	2.69021	3.44243	2.50992	3.46291	2.16102	3.17863	2.47538	3.94889	2.38868	2.47416
YDL072C	42 - YDL072C ... YET3 biological process unknown molecular function unknown endoplasmic reticulum | YDL073W	42	38	1.145	1.15033	1.34036	1.11848	1.284	1.13007	1.95401	2.17688	1.92769	2.41397	2.2658	2.14188	2.10642	1.91036	2.21935	1.97565	2.27473	2.32879
YBR149W	42 - YBR149W iESR cluster ARA1 carbohydrate metabolism aldo-keto reductase activity* cytosol | YBR150C	42	38	1.35052	1.11205	1.27325	0.92911	1.47971	1.42294	2.31527	2.46757	1.82655	2.24451	2.00408	2.31222	1.96246	2.07421	2.16065	1.84624	1.91987	2.25966
YNL115C	42 - YNL115C iESR cluster YNL115C biological process unknown molecular function unknown vacuole (sensu Fungi) | YNL116W	42	38	1.20398	1.27024	1.27974	1.21009	1.29253	1.50406	2.41915	2.77632	2.23725	2.38309	2.32747	2.6732	1.55878	1.77975	1.76927	1.699	1.80354	1.91005
YCL038C	42 - YCL038C ... ATG22 protein-vacuolar targeting* molecular function unknown integral to membrane* | YCL039W	42	38	1.30698	1.49978	1.16999	1.60585	1.63219	1.31292	2.30018	2.00497	2.31541	2.10572	2.15687	1.89114	1.82936	2.18037	1.97717	1.95223	2.3273	2.78211
YGL208W	42 - YGL208W iESR cluster SIP2 protein amino acid phosphoryla AMP-activated protein kinase activicytoplasm* | YGL209W	42	38	1.35719	0.96368	1.02787	0.91028	1.43326	1.21477	2.12141	1.97408	1.75093	2.62692	2.16852	1.98371	1.96149	2.03641	1.85281	1.89953	1.91796	2.17542
YDR100W	42 - YDR100W ... TVP15 biological process unknown molecular function unknown COPI-coated vesicle | YDR101C	42	38	1.29057	1.38327	1.50756	1.47552	1.571	1.27213	2.34029	1.98276	2.25082	2.1826	2.55658	2.27425	2.11225	1.85329	2.18623	2.00152	1.89956	2.19794
YGL205W	42 - YGL205W ... POX1 fatty acid beta-oxidation acyl-CoA oxidase activity peroxisomal matrix | YGL206C	42	38	0.86139	1.44957	1.19099	1.32041	1.52431	1.25087	2.24291	2.56642	2.10323	2.54151	2.21617	2.67793	1.27443	2.10344	1.54703	2.03129	1.79604	2.02274
YDR391C	42 - YDR391C ... YDR391C biological process unknown molecular function unknown cytoplasm* | YDR392W	42	38	1.06242	0.92075	1.03632	1.11478	1.14374	1.3822	2.41709	2.5985	2.10143	2.09002	2.39785	2.27546	1.23306	1.64301	1.80814	1.7249	1.96431	2.04788
YJL089W	42 - YJL089W ... SIP4 regulation of transcription fr specific RNA polymerase II transcrinucleus | YJL090C	42	38	1.21942	2.03972	1.40647	1.54493	1.3811	1.68104	2.15304	1.96551	1.52714	2.32859	1.89908	2.25935	2.22843	2.52565	2.01119	2.34684	2.00211	2.03071
YPL223C	42 - YPL223C ... GRE1 response to stress* molecular function unknown cytoplasm | YPL224C	42	38	1.20061	1.47161	1.26079	1.1794	1.27164	1.36538	1.99373	2.72332	1.84735	2.70027	1.72079	2.80258	1.29009	1.36197	1.64962	1.69198	1.36404	1.74252
YNL173C	42 - YNL173C ... MDG1 signal transduction during con molecular function unknown plasma membrane | YNL174W	42	38	1.38197	1.26677	1.57948	1.04329	1.45427	1.35172	2.18524	1.70293	2.55891	2.16208	2.28481	2.14325	2.03093	1.56397	1.95223	1.68426	1.93895	1.47918
YHR008C	42 - YHR008C ... SOD2 replicative cell aging* manganese superoxide dismutase actimitochondrion* | YHR009C	42	38	1.06879	0.69336	0.91017	0.7108	1.53317	1.03152	2.38042	2.42828	1.96426	2.61268	2.60962	2.39656	1.86336	1.74666	1.8737	1.81019	1.99503	2.15207
YMR261C	42 - YMR261C ... TPS3 response to stress* "alpha,alpha-trehalose-phosphate syn""alpha,alpha-trehalose-phosphate syn" | YMR262W	42	38	1.49557	1.5705	1.75211	1.7481	1.73206	1.6599	2.51674	2.94544	2.41888	2.44064	2.41287	2.62155	1.97311	2.07567	2.18	1.78076	2.64066	2.56405
YBR052C	42 - YBR052C ˜ iESR cluster RFS1 biological process unknown molecular function unknown | Protein of unknown function; member of a flavodoxin-like fold protein family that includes Pst2p and Ycp4p; green fluorescent protein (GFP)-fusion protein localizes to the cytoplasm in a punctate patternYBR053C	42	38	1.79067	1.60451	1.77061	1.59631	2.02724	1.67304	2.60666	2.20302	2.28659	2.40522	2.59129	2.47729	2.39756	2.3158	2.51048	1.99931	2.25119	1.99428
YPL154C	42 - YPL154C iESR cluster PEP4 sporulation* endopeptidase activity* mitochondrion* | YPL155C	42	38	1.22004	1.41374	1.23834	1.38352	1.50134	1.34085	2.60237	2.73679	2.34262	2.55091	2.89501	2.73202	2.11308	2.59091	2.50855	1.90482	2.43463	2.35898
YDR513W	42 - YDR513W ˜ iESR cluster GRX2 (TTR1) mRNA-nucleus export* DNA binding* nucleus* | Cytoplasmic glutaredoxin, thioltransferase, glutathione-dependent disulfide oxidoreductase involved in maintaining redox state of target proteins, also exhibits glutathione peroxidase activity, expression induced in response to stressYDR514C	42	38	1.49398	1.448	1.39054	1.39546	1.51353	1.42673	2.59784	2.55502	2.84011	2.86856	2.89475	2.7559	2.01756	1.99859	2.2239	2.08035	2.01465	2.07221
YMR031C	42 - YMR031C ... YMR031C biological process unknown molecular function unknown cytoplasm* | YMR032W	42	38	1.29421	1.27542	1.30024	1.15577	1.25712	1.22532	2.50521	2.64274	2.80825	2.6819	2.82417	2.57709	1.70579	1.98931	2.37374	1.592	2.1181	2.02811
YNR001C	42 - YNR001C iESR cluster CIT1 tricarboxylic acid cycle* citrate (Si)-synthase activity mitochondrion* | YNR001W-A	42	38	1.42754	1.49937	1.48628	1.51706	1.74876	1.54814	2.70916	3.36284	2.34291	2.62475	2.72945	3.07353	1.82632	1.95487	1.91355	1.87413	2.33157	1.99569
YPL265W	42 - YPL265W ... DIP5 amino acid transport amino acid transporter activity* plasma membrane | YPL266W	42	38	0.91316	1.0715	0.992	0.96328	1.49387	1.25009	2.73138	3.24235	2.63211	2.80997	2.47653	2.93228	1.81367	1.83649	1.92429	1.94673	2.31478	2.06503
YBR297W	42 - YBR297W ... MAL33 regulation of transcription, D transcription factor activity nucleus | YBR298C	42	38	1.06107	1.75894	0.96118	1.54906	1.31858	1.19203	2.63957	2.47982	1.80821	2.77251	2.23322	2.11341	1.77136	1.90247	2.42239	2.48739	2.57165	2.48585
YOL085W-A	42 - YOL085W-A ˜ Dubious Dubious open reading frame unlikely to encode a protein, based on available experimental and comparative sequence data; partially overlaps the dubious ORF YOL085CYOL103W-A	42	38	1.63268	0.8308	1.62178	1.92324	1.7101	0.75002	1.85573	1.98781	2.85794	2.88441	2.71007	1.90633	2.3613	2.32552	1.95582	1.8476	2.32175	1.38605
YGR130C	42 - YGR130C ... YGR130C biological process unknown molecular function unknown cytoplasm | YGR131W	42	38	1.54944	1.5463	1.70492	1.3681	1.51166	1.77302	1.97116	1.75857	2.34858	2.23949	2.32064	2.21812	2.12412	1.8638	2.20873	1.5369	2.08254	1.75726
YKL065C	42 - YKL065C iESR cluster YET1 biological process unknown molecular function unknown endoplasmic reticulum | YKL066W	42	38	1.3659	1.45481	1.47635	1.35535	1.24102	1.41624	2.5073	2.21691	2.30259	2.37662	2.69793	2.57506	1.77146	1.68582	1.97043	1.49199	1.43826	1.96627
YDR059C	42 - YDR059C iESR cluster UBC5 endocytosis* ubiquitin conjugating enzyme activiproteasome complex (sensu Eukaryota | YDR060W	42	38	1.69443	1.60411	2.04019	1.54024	1.85201	1.33675	2.47413	2.19093	2.03023	2.50472	2.52732	2.19154	1.90214	1.85424	2.0378	1.92918	2.10734	2.33023
YJR059W	42 - YJR059W iESR cluster PTK2 G1/S transition of mitotic cel protein kinase activity cytoplasm* | YJR060W	42	38	1.69908	1.73609	1.78552	1.47217	1.82127	1.65339	2.50806	2.52775	2.6635	2.7648	2.60651	2.84883	2.08374	1.86621	2.12947	1.67454	1.99453	1.95938
YML118W	42 - YML118W ... NGL3 biological process unknown endonuclease activity cellular component unknown | YML119W	42	38	1.42776	1.31213	1.31702	1.04526	1.22542	1.82523	2.41458	2.49941	2.16154	2.90984	2.38499	2.80805	1.71366	2.03999	1.75696	2.15092	1.40895	1.79201
YJL185C	42 - YJL185C ... YJL185C biological process unknown molecular function unknown cellular component unknown | YJL186W	42	38	1.5323	1.20652	1.17095	1.77429	1.71571	1.56775	2.84361	2.47151	2.10434	3.09836	2.37516	2.58261	1.3524	1.5638	1.46575	1.48171	1.59412	2.25477
YBL040C	28 - YBL040C ... ERD2 protein-ER retention HDEL sequence binding integral to endoplasmic reticulum m | YBL041W	28	39	0.88107	1.11866	0.93609	1.01432	0.73037	0.78026	0.8974	1.23777	1.33292	0.951345	1.17248	1.3747	0.740615	0.815305	0.937735	0.564415	0.86256	0.95535
YDL054C	28 - YDL054C ... MCH1 transport transporter activity* membrane | YDL055C	28	39	0.61224	1.01369	0.78681	0.92444	0.72269	0.82995	1.49981	1.31785	1.28338	1.22395	1.26248	1.27225	0.471495	0.773265	0.695245	0.709335	0.79739	1.02605
YKR051W	28 - YKR051W ... YKR051W biological process unknown molecular function unknown cellular component unknown | YKR052C	28	39	0.77759	1.03544	0.95146	0.56693	0.70898	0.85367	1.34186	1.34722	1.03331	1.34248	1.30168	1.00792	0.561865	0.755345	0.834505	0.838255	0.81438	0.9064
YIL088C	28 - YIL088C ... AVT7 transport transporter activity vacuole | YIL089W	28	39	0.5092	0.88971	0.61698	0.63175	0.77979	0.75385	1.41394	1.59133	1.22276	1.47317	1.46543	1.26445	0.552735	0.639505	0.706935	0.719065	1.04249	0.97837
YBR199W	28 - YBR199W ... KTR4 N-linked glycosylation mannosyltransferase activity Golgi apparatus | YBR200W	28	39	1.00812	0.89077	0.86269	0.93809	0.6182	0.9223	1.29357	1.52876	1.15302	1.08303	1.17564	1.48663	0.966545	1.27581	1.08807	0.856775	1.19485	1.10737
YDR406W	28 - YDR406W ... PDR15 transport "ATPase activity, coupled to transme"integral to membrane | YDR407C	28	39	0.94715	0.97629	1.07696	1.00758	1.07059	0.69366	1.35777	1.44773	1.19189	1.39101	1.34322	1.15189	0.820855	1.0493	1.14179	1.17776	1.28192	1.55805
YBR037C	28 - YBR037C ... SCO1 protein complex assembly* thioredoxin peroxidase activity* mitochondrial inner membrane | YBR038W	28	39	0.98368	0.81985	0.80101	0.80873	1.10783	0.91195	1.44786	1.4207	0.899535	1.23843	1.43929	1.33085	1.09061	1.17778	1.22758	1.24165	1.2449	1.33732
YDR436W	28 - YDR436W ... PPZ2 sodium ion homeostasis protein serine/threonine phosphatascellular component unknown | YDR437W	28	39	1.01068	0.64576	0.98277	0.72451	0.92136	0.79639	1.39403	1.3753	1.14512	1.27797	1.41612	1.42847	0.994555	1.17233	1.23601	1.2915	1.38639	1.31273
YAL002W	28 - YAL002W ... VPS8 late endosome to vacuole trans molecular function unknown membrane fraction | YAL003W	28	39	0.90046	0.98302	0.90642	0.96775	1.04111	0.67314	1.16403	1.4447	1.00872	1.20982	1.05205	1.3235	0.935915	1.17084	1.20684	1.13401	1.22247	1.50551
YDL089W	28 - YDL089W ˜ NUR1 biological process unknown molecular function unknown | Protein of unknown function; interacts with Csm1p, Lrs4p; required for rDNA repeat stability; null mutant causes increase in unequal sister-chromatid exchange; GFP-fusion protein localizes to the nuclear periphery, possible Cdc28p substrateYDL090C	28	39	0.64069	0.72524	0.66241	0.82504	0.86795	0.75204	1.10216	1.44555	1.28225	1.23419	1.14256	1.2141	0.918865	1.22158	1.18172	1.06137	1.02222	1.39162
YIL065C	28 - YIL065C ... FIS1 mitochondrial fission molecular function unknown mitochondrial outer membrane | YIL066C	28	39	0.87599	0.96713	0.94224	0.9492	0.77017	1.01241	1.21381	1.31191	1.37932	1.41131	1.44877	1.14924	1.00951	0.847095	0.915525	0.948815	0.85097	0.96882
YGL084C	28 - YGL084C ... GUP1 glycerol transport* O-acyltransferase activity endoplasmic reticulum* | YGL085W	28	39	0.66745	0.77226	0.91649	0.9044	0.87479	0.79289	1.27009	1.34108	1.21277	1.03251	1.10714	1.21009	0.798135	1.00882	1.00212	1.07395	0.97213	1.12888
YBR041W	28 - YBR041W ... FAT1 lipid transport* long-chain-fatty-acid-CoA ligase acplasma membrane* | YBR042C	28	39	0.69377	0.88124	0.75906	0.86029	0.76762	0.86965	1.09084	1.36322	1.08586	1.16602	1.07287	1.07313	0.829395	0.981745	0.851785	0.934365	1.1587	1.14223
YLR241W	28 - YLR241W ... YLR241W biological process unknown molecular function unknown cellular component unknown | YLR242C	28	39	0.75283	0.72908	0.88281	0.89673	0.78993	0.718	1.29024	1.52541	1.13813	1.2007	1.12676	1.09095	0.801745	0.991805	1.02605	0.971575	1.06656	1.2648
YLR324W	28 - YLR324W ... PEX30 peroxisome organization and bi molecular function unknown peroxisome* | YLR325C	28	39	0.7047	0.85578	0.78585	0.77784	0.82431	0.82996	1.34337	1.58274	1.31176	1.10766	1.4235	1.21647	1.07715	1.19873	1.08652	1.03947	1.30881	1.31823
YIL034C	28 - YIL034C ... CAP2 barbed-end actin filament capp actin filament binding actin cortical patch* | YIL035C	28	39	1.06804	1.03043	0.99285	1.06962	0.96615	0.97835	1.24204	1.31367	1.26262	1.32445	1.39279	1.31584	1.15447	1.07333	1.1458	1.21321	1.18652	1.00249
YPL196W	28 - YPL196W iESR cluster OXR1 response to oxidative stress molecular function unknown mitochondrion | YPL197C	28	39	0.91612	0.92821	1.20097	0.98644	1.05915	0.88974	1.39559	1.29177	1.13609	1.35696	1.34469	1.13106	1.05726	0.969035	1.14301	1.20046	0.9465	0.95283
YOL129W	28 - YOL129W ... VPS68 protein-vacuolar targeting molecular function unknown mitochondrion* | YOL130W	28	39	0.73121	0.84797	0.75523	0.80765	1.23981	0.93617	1.27542	1.14125	1.30819	1.12908	1.34872	1.27188	0.741975	1.08519	0.938365	0.805165	0.99127	1.30602
YLR454W	28 - YLR454W ... FMP27 biological process unknown molecular function unknown mitochondrion | YLR455W	28	39	0.59455	0.73758	0.62113	0.68642	0.717	0.98021	1.15241	1.63098	1.26588	1.29373	1.22663	1.43162	0.814995	1.20307	1.00289	0.788695	1.13205	0.93467
YOL119C	28 - YOL119C ... MCH4 transport transporter activity* vacuolar membrane (sensu Fungi) | YOL120C	28	39	0.52977	0.71528	0.6826	0.92093	0.94052	0.70104	1.23875	1.62871	1.48287	1.13687	1.29458	1.26737	0.840315	0.973305	1.06778	0.735825	1.23658	1.3025
YPR155C	28 - YPR155C ... NCA2 aerobic respiration* molecular function unknown mitochondrion | YPR156C	28	39	0.66219	0.53541	0.66286	0.59242	0.59866	0.68714	1.25094	1.44406	1.12678	1.53377	1.25041	1.30882	0.787975	0.807875	1.05305	0.883845	0.94356	0.95763
YNL074C	28 - YNL074C ... MLF3 response to drug molecular function unknown cytoplasm | YNL075W	28	39	1.03387	0.80779	0.89292	0.93643	1.07033	0.86923	1.31806	1.25155	1.05018	1.03788	1.29082	1.26886	0.938885	0.579005	0.987835	0.811725	0.86086	1.24797
YJL020C	28 - YJL020C ... BBC1 actin cytoskeleton organizatio myosin I binding actin cortical patch | YJL022W	28	39	0.64623	0.89311	0.8615	0.42569	0.65656	0.94109	1.28946	1.08489	1.62789	1.57044	1.63156	1.38589	1.14773	0.908645	1.27659	0.687755	1.17195	0.94411
YHR101C	28 - YHR101C ... BIG1 cell wall biosynthesis (sensu molecular function unknown endoplasmic reticulum* | YHR102W	28	39	0.72646	0.68631	0.7285	0.95667	0.79112	0.9756	1.04482	1.46782	1.3541	1.37916	1.30543	1.54249	0.725785	0.916035	0.825925	0.713795	1.09223	0.93841
YKL100C	28 - YKL100C iESR cluster YKL100C biological process unknown molecular function unknown cellular component unknown | YKL101W	28	39	0.66829	0.83431	0.87334	1.01274	0.87333	0.96893	1.39389	1.75419	1.26649	1.31646	1.41148	1.36779	0.713325	0.896195	0.941825	0.945995	1.20825	1.28994
YKR098C	28 - YKR098C ... UBP11 biological process unknown ubiquitin-specific protease activitcellular component unknown | YKR099W	28	39	0.79117	0.92924	0.80212	0.76546	0.67843	0.99759	1.22527	1.20043	1.10485	1.32201	1.21683	1.26345	0.824315	0.912265	1.03557	0.828545	1.01191	0.7328
YPL206C	28 - YPL206C ˜ PGC1 biological process unknown molecular function unknown | Phosphatidyl Glycerol phospholipase C; regulates the phosphatidylglycerol (PG) content via a phospholipase C-type degradation mechanism; contains glycerophosphodiester phosphodiesterase motifsYPL207W	28	39	0.81536	0.66794	0.73981	1.0897	0.95084	0.48978	1.48513	1.57096	1.55848	1.18606	1.43911	1.41514	0.881145	1.21263	1.27977	1.2516	1.44528	1.54853
YDL174C	28 - YDL174C ... DLD1 aerobic respiration* D-lactate dehydrogenase (cytochromemitochondrial inner membrane | YDL175C	28	39	0.5635	0.37395	0.55813	0.54266	0.98918	0.65215	1.30478	1.46592	1.17538	1.18542	1.57591	1.41233	0.941825	1.00005	0.796515	0.848455	1.07327	1.0726
YMR152W	28 - YMR152W ... YIM1 mitochondrial protein processi peptidase activity cytoplasm* | YMR153C-A	28	39	0.62245	0.60786	0.67824	0.68944	0.56157	0.77081	1.44187	1.76941	1.14209	1.78048	1.52805	1.41922	1.09556	1.15746	1.28529	0.917935	1.25656	1.09534
YDR019C	28 - YDR019C ... GCV1 one-carbon compound metabolism glycine dehydrogenase (decarboxylatmitochondrion* | YDR020C	28	39	0.80275	0.43047	0.66257	0.56957	0.96445	1.02782	1.24371	1.44373	1.08537	1.36753	1.58138	1.20826	1.53069	1.5125	1.09265	0.555745	1.24093	0.97617
YDR061W	28 - YDR061W ... YDR061W biological process unknown "ATPase activity, coupled to transme"mitochondrion | YDR062W	28	39	0.78894	0.8181	0.85027	0.80332	0.87179	0.68774	0.96296	1.31624	1.25439	1.00436	1.08462	1.28035	1.19426	1.46396	1.31323	0.838065	0.85106	0.97878
YCR076C	28 - YCR076C ... YCR076C biological process unknown molecular function unknown cellular component unknown | YCR077C	28	39	1.1187	0.569	0.78647	0.55241	1.00361	0.97599	1.32197	1.29472	1.3019	1.23206	1.01856	1.11488	0.852435	0.806935	0.869495	1.0011	0.92989	0.95728
YML110C	28 - YML110C iESR cluster COQ5 aerobic respiration* "2-hexaprenyl-6-methoxy-1,4-benzoqui"mitochondrion | YML111W	28	39	0.83337	0.65015	0.80507	0.5528	1.2613	0.61478	1.54888	1.33942	1.13434	1.27561	1.28934	1.09661	1.16555	1.24382	1.18616	0.867185	1.49032	1.50587
YHR202W	28 - YHR202W ... YHR202W biological process unknown molecular function unknown vacuole (sensu Fungi)* | YHR203C	28	39	0.82848	0.60201	0.69179	0.65315	1.16716	0.9461	1.5265	1.65488	1.28225	1.77703	1.34286	1.24998	1.08306	0.827735	0.984785	0.995005	0.93637	1.18421
YPL229W	28 - YPL229W ... YPL229W biological process unknown molecular function unknown cytoplasm | YPL230W	28	39	0.59995	0.82609	0.76583	0.58073	0.75466	0.74445	1.76968	1.47493	1.35051	1.94141	1.45901	1.17643	0.610725	0.676945	0.782255	0.864015	1.06001	1.17858
YDR284C	28 - YDR284C ... DPP1 signal transduction* phosphatidate phosphatase activity*vacuolar membrane (sensu Fungi) | YDR285W	28	39	1.01381	0.95621	1.12098	1.23869	1.13466	1.01306	1.1966	1.82095	1.62722	1.02239	1.1506	1.32012	0.516515	0.812255	0.859825	0.577485	0.83584	0.93513
YNL156C	28 - YNL156C ... NSG2 biological process unknown molecular function unknown endoplasmic reticulum | YNL157W	28	39	0.96003	0.84417	0.97546	1.13031	1.12495	0.90872	1.52776	1.75977	1.62079	1.19886	1.50042	1.57553	0.528905	0.776355	0.782195	0.726945	0.65063	0.62804
YKL067W	28 - YKL067W iESR cluster YNK1 purine nucleotide biosynthesis nucleoside-diphosphate kinase activcytosol* | YKL068W	28	39	1.00265	1.03532	1.04667	1.06884	1.13099	1.04406	1.49803	1.80957	1.17352	0.929205	1.32622	1.42253	0.636785	0.907225	0.731755	0.562745	0.75517	0.674
YGL160W	28 - YGL160W ˜ AIM14 biological process unknown oxidoreductase activity | Putative protein of with similarity to iron/copper reductases (FRE1-8), possibly involved in iron homeostasis; may interact with ribosomes; null mutant displays elevated frequency of mitochondrial genome lossYGL161C	28	39	0.61282	1.00292	0.92103	0.78785	0.77191	0.85293	1.56705	1.22081	1.5254	1.50039	1.49797	1.5193	0.757095	0.818515	0.886685	0.733205	0.71501	0.88806
YOR014W	28 - YOR014W ... RTS1 protein biosynthesis* protein phosphatase type 2A activitcytoplasm* | YOR015W	28	39	0.92531	0.93584	1.09356	0.83614	0.85142	1.06513	1.22616	1.62411	1.53151	1.25889	1.16383	1.25124	0.804045	0.817845	0.750075	0.582395	0.94588	0.73102
YER081W	28 - YER081W ... SER3 serine family amino acid biosy phosphoglycerate dehydrogenase acticytoplasm | YER082C	28	39	1.18059	1.09289	1.23122	1.18907	0.92105	0.94891	1.49253	1.48123	1.27029	1.33719	1.04238	1.24158	0.747115	1.11841	1.10949	0.799465	0.99009	1.17129
YPR091C	28 - YPR091C ... YPR091C biological process unknown molecular function unknown endoplasmic reticulum | YPR092W	28	39	0.93433	0.92316	1.02896	0.93335	0.93626	1.14258	1.40893	1.40736	1.48937	1.54007	1.48735	1.47646	0.886425	0.922375	1.13189	0.757735	1.26073	0.98266
YOL107W	28 - YOL107W ... YOL107W biological process unknown molecular function unknown Golgi apparatus* | YOL108C	28	39	0.68002	0.86646	1.12011	1.03607	1.04796	0.88256	1.48002	1.64563	1.11767	1.46215	1.448	1.20266	0.639195	0.851235	0.775775	0.968055	0.92611	0.97086
YCR075C	28 - YCR075C ... ERS1 L-cystine transport L-cystine transporter activity integral to membrane | YCR075W-A	28	39	0.95207	0.76551	1.07497	1.11146	1.15444	1.10562	1.0749	1.34492	1.22534	1.42803	1.1078	1.59196	0.810145	0.865425	0.893625	0.960565	1.03362	1.17189
YCR011C	36 - YCR011C ... ADP1 transport "ATPase activity, coupled to transme"cytoplasm* | YCR012W	36	39	0.73597	0.70126	0.83288	0.8641	0.94783	0.83388	1.54162	2.08255	1.54696	1.58596	1.44248	1.81587	1.07305	1.41739	1.36617	1.15162	1.49841	1.36742
YMR191W	36 - YMR191W ... SPG5 biological process unknown molecular function unknown cellular component unknown | YMR192W	36	39	0.59743	1.11403	0.79293	1.36738	0.80152	0.96532	1.71627	1.50771	1.5472	1.66535	1.55326	1.56098	1.02462	1.34203	1.24552	1.52178	1.45359	1.69079
YNR007C	36 - YNR007C ... ATG3 protein-vacuolar targeting* molecular function unknown cytoplasm | YNR008W	36	39	1.06443	0.66781	1.00163	0.91632	0.79066	1.34587	1.30576	1.6542	1.28392	1.63254	1.27297	1.17572	1.00768	1.33635	1.33692	1.05296	1.15099	1.24825
YFR008W	36 - YFR008W ... FAR7 cell cycle arrest in response molecular function unknown cellular component unknown | YFR009W	36	39	1.10932	1.11971	0.96695	1.07759	0.85104	1.05058	1.16625	1.56777	1.06224	1.72832	1.50646	1.55808	1.45978	1.75056	1.26446	1.16853	1.39637	1.05616
YGR209C	36 - YGR209C iESR cluster TRX2 response to oxidative stress* thiol-disulfide exchange intermediacytosol* | YGR210C	36	39	0.62643	0.76792	0.76098	0.76919	1.21312	0.66881	1.86815	1.27004	1.5838	1.7212	1.82191	1.56181	1.17051	1.37098	1.34562	1.25632	1.20071	1.41249
YBR050C	36 - YBR050C ... REG2 negative regulation of transcr protein phosphatase type 1 activityprotein phosphatase type 1 complex | YBR051W	36	39	0.81681	1.13884	0.70897	0.62287	0.76385	1.35224	1.7092	1.37993	1.47971	1.95312	1.50101	1.80757	1.57272	1.48117	1.2769	1.55418	0.87724	1.32447
YDL113C	36 - YDL113C ... ATG20 protein-vacuolar targeting* lipid binding membrane | YDL114W	36	39	1.14041	1.08832	0.9953	1.25611	0.72624	1.24499	1.23205	1.29136	1.46385	1.55405	1.6341	1.26673	0.926825	0.935845	1.00368	0.598635	0.79238	0.75179
YDR505C	36 - YDR505C ... PSP1 biological process unknown molecular function unknown cytoplasm* | YDR506C	36	39	1.11747	1.10667	0.84591	1.14732	1.01459	1.26032	1.23573	1.69216	1.53747	1.46061	1.11539	1.48803	1.11123	1.26141	0.985945	0.908455	1.10688	1.09964
YFR049W	36 - YFR049W ... YMR31 protein biosynthesis structural constituent of ribosome mitochondrial small ribosomal subun | YFR050C	36	39	1.19322	0.8972	1.26368	1.09785	1.35748	1.29847	1.31907	1.33167	1.14579	1.58865	1.64408	1.37058	1.03338	1.01005	1.07452	1.14375	1.10405	0.95756
YOR219C	36 - YOR219C ... STE13 peptide pheromone maturation aminopeptidase activity Golgi trans face | YOR220W	36	39	1.00858	0.99821	1.07299	0.95451	1.07405	1.16245	1.74091	1.71094	1.65003	1.91355	1.68052	1.7626	0.983735	1.25639	1.18247	1.0835	1.19328	1.15949
YBR212W	36 - YBR212W ... NGR1 mitochondrion organization and RNA binding* cytoplasm* | YBR213W	36	39	1.10533	1.20506	1.33423	0.9804	1.06313	1.12655	1.6278	1.36172	1.42833	1.62298	1.44164	1.45637	1.26937	1.14562	1.25151	1.16847	1.12625	1.49918
YDL234C	36 - YDL234C ... GYP7 vesicle-mediated transport Rab GTPase activator activity cytoplasm | YDL235C	36	39	1.0745	1.16377	1.05731	1.24764	1.01866	1.37017	1.28639	1.7409	1.46354	1.6707	1.4698	1.50642	1.09698	1.33561	1.25338	0.989885	1.21972	1.27926
YKL121W	36 - YKL121W ˜ iESR cluster DGR2 biological process unknown molecular function unknown | Protein of unknown function; null mutant is resistant to 2-deoxy-D-glucose and displays abnormally elongated budsYKL122C	36	39	1.37206	1.06244	1.12906	0.89007	1.32734	1.37757	1.61763	1.75436	1.34413	1.87172	1.41835	1.59197	0.979855	1.20734	1.31793	1.31483	1.27929	1.31748
YDL119C	36 - YDL119C ... YDL119C transport transporter activity mitochondrial inner membrane | YDL120W	36	39	1.16347	1.25126	1.40265	1.11263	0.99434	1.27376	1.41588	1.2792	1.25367	1.95537	1.54131	1.35109	1.00205	0.940945	1.06675	0.969515	0.99574	1.25251
YDL091C	36 - YDL091C ... UBX3 biological process unknown molecular function unknown cytoplasm | YDL092W	36	39	1.10508	1.23448	1.19637	1.15706	1.05536	1.24219	1.24592	1.46845	1.25266	1.64373	1.302	1.47968	0.926315	0.932725	0.888315	0.839555	0.67693	0.955
YNL045W	36 - YNL045W ˜ LAP2 lipid metabolism* aminopeptidase activity* | Leucyl aminopeptidase yscIV (leukotriene A4 hydrolase) with epoxide hydrolase activity, metalloenzyme containing one zinc atom; green fluorescent protein (GFP)-fusion protein localizes to the cytoplasm and nucleusYNL046W	36	39	0.89082	1.24935	1.24372	1.24879	1.05173	0.99295	1.60903	1.78978	1.64288	1.22117	1.52507	1.46477	0.804595	0.666245	1.03277	1.02659	1.08961	1.21639
YPL219W	36 - YPL219W ... PCL8 regulation of glycogen biosynt cyclin-dependent protein kinase regcyclin-dependent protein kinase hol | YPL220W	36	39	1.21496	0.92416	1.26218	1.05524	1.29816	0.98543	1.79231	1.80716	1.4807	1.68782	1.53588	1.73809	0.725175	1.15789	1.1285	0.960215	1.04825	1.2217
YDL019C	36 - YDL019C ... OSH2 steroid biosynthesis oxysterol binding plasma membrane* | YDL020C	36	39	0.95381	1.08467	1.13546	0.76972	0.84829	1.00446	1.56928	1.59197	1.90054	1.78513	1.7627	1.81198	1.07902	0.904495	1.24226	0.796675	1.16568	1.26595
YML057W	36 - YML057W ... CMP2 cell ion homeostasis* calcium-dependent protein serine/thcytoplasm* | YML058W	36	39	1.18656	0.78214	1.12736	0.85798	1.06247	0.93532	1.81263	1.45396	1.70328	1.88731	1.71898	1.78746	1.0205	0.824805	1.09405	0.954135	1.11525	1.18249
YHR080C	36 - YHR080C ... YHR080C biological process unknown molecular function unknown mitochondrion | YHR081W	36	39	0.89972	0.9919	0.92572	0.86313	0.79828	1.21403	1.73501	1.71958	1.7286	1.99223	1.86409	1.73148	0.757075	0.714145	0.904155	0.895565	1.00169	0.82776
YBL039W-B	36 - YBL039W-B ... YBL039W-B biological process unknown molecular function unknown cellular component unknown | YBL040C	36	39	1.03382	0.82645	1.56794	1.27492	1.22303	0.9741	1.45047	1.15013	1.55039	1.75358	1.63595	1.59268	0.962335	1.07207	1.34901	1.01316	0.83307	1.25557
YIL006W	36 - YIL006W ˜ YIA6 transport* transporter activity* | Mitochondrial NAD+ transporter, involved in the transport of NAD+ into the mitochondria (see also YEA6); member of the mitochondrial carrier subfamily; disputed role as a pyruvate transporter; has putative mouse and human orthologsYIL007C	36	39	1.3171	1.18286	0.65681	1.195	1.33067	1.1042	1.79038	1.76082	1.54578	1.76235	1.52979	1.57184	0.654825	0.642195	0.891835	0.937305	0.5457	1.08067
YBL086C	36 - YBL086C ... YBL086C biological process unknown molecular function unknown cellular component unknown | YBL087C	36	39	1.40339	1.03894	1.28256	1.00193	0.81265	1.5306	1.30657	1.35316	1.70141	1.406	1.46951	1.37658	1.04543	0.685635	1.17239	0.745905	0.98228	0.55892
YLR206W	36 - YLR206W ... ENT2 endocytosis* clathrin binding actin cortical patch | YLR207W	36	39	1.26101	1.34725	1.39168	1.15876	0.94357	1.35845	1.20268	1.25317	1.81364	1.53208	1.84206	1.64824	1.18576	0.747675	1.10752	0.652175	1.13211	0.77147
YDR043C	36 - YDR043C ... NRG1 regulation of transcription fr DNA binding* nucleus | YDR044W	36	39	1.02208	1.26974	1.27725	1.29921	0.81382	1.50699	1.30981	1.89081	1.74992	1.8592	1.42796	1.73426	0.786645	0.845885	1.15248	1.11547	1.18674	1.31746
YHR017W	36 - YHR017W ... YSC83 biological process unknown molecular function unknown mitochondrion | YHR018C	36	39	1.21539	1.16286	1.2442	1.59042	0.86851	0.91774	1.44807	1.83946	1.38821	1.4351	1.34629	1.67996	1.01273	0.922295	1.3968	0.863945	1.16632	1.28407
YMR119W-A	36 - YMR119W-A ... | YMR120C	36	39	1.07457	1.46277	1.15411	1.46622	1.1714	1.15372	1.68619	1.57119	1.17606	1.81373	1.37688	1.62319	0.964765	1.02636	1.27381	1.32851	1.17729	0.94776
YDR272W	36 - YDR272W iESR cluster GLO2 carbohydrate metabolism hydroxyacylglutathione hydrolase accytoplasm | YDR273W	36	39	0.81713	0.78346	1.03544	0.85564	1.04452	0.96551	1.41252	2.03658	1.8195	1.84895	1.90746	1.77682	1.20915	1.32622	1.22098	0.887535	1.18168	0.90536
YJL151C	36 - YJL151C ... SNA3 biological process unknown molecular function unknown membrane* | YJL152W	36	39	1.10955	0.92553	1.13619	1.07539	1.01306	0.88459	1.65487	1.60607	1.90074	1.79858	1.53904	1.52676	1.36197	0.968985	1.39986	0.799495	1.30187	1.34325
YKL188C	36 - YKL188C iESR cluster PXA2 fatty acid transport "ATPase activity, coupled to transme"integral to peroxisomal membrane | YKL189W	36	39	0.99738	1.30321	0.70329	1.03279	1.00655	1.49607	1.82527	1.90281	1.57109	2.22487	1.63296	2.01303	0.724085	1.04653	0.900095	1.23599	0.82911	1.11358
YKL026C	36 - YKL026C iESR cluster GPX1 response to oxidative stress glutathione peroxidase activity cellular component unknown | YKL027W	36	39	1.04491	1.43178	1.2765	1.39226	1.38766	1.92915	1.7308	1.70473	1.62156	2.25237	1.64564	1.92721	0.639805	1.00323	1.03619	1.29585	0.68421	1.21278
YPL147W	36 - YPL147W ... PXA1 fatty acid transport "ATPase activity, coupled to transme"integral to peroxisomal membrane | YPL148C	36	39	1.25648	1.5918	1.1584	1.3644	1.06428	1.66792	1.57074	1.69714	1.49013	2.04113	1.51261	1.36989	0.959325	1.18471	0.998245	1.54424	0.95229	1.12195
YMR030W	36 - YMR030W ... RSF1 aerobic respiration* molecular function unknown nucleus* | YMR030W-A	36	39	1.1813	1.29649	1.31335	0.83912	0.99918	1.43092	1.43614	1.68047	1.2968	1.96053	1.39847	1.32899	0.863525	1.09	1.08495	0.742375	0.66258	1.26265
YKL107W	36 - YKL107W ... YKL107W biological process unknown molecular function unknown cellular component unknown | YKL108W	36	39	0.86285	1.14882	1.29453	1.24259	1.47432	1.53517	1.49018	1.93649	1.13767	1.94695	1.40466	1.77382	1.05577	1.2264	0.874195	1.59567	0.65816	0.7978
YGR287C	36 - YGR287C ... YGR287C biological process unknown "hydrolase activity, hydrolyzing O-g"mitochondrion | YGR288W	36	39	0.8359	1.1932	0.90616	1.17094	1.24261	1.15697	1.47617	2.24764	1.78306	1.68681	1.45073	2.02271	0.295695	1.1243	0.724335	1.10106	0.61716	1.27487
YIL121W	36 - YIL121W ... QDR2 multidrug transport multidrug efflux pump activity integral to plasma membrane | YIL122W	36	39	0.94712	0.9283	1.12469	0.7922	1.14101	0.86926	1.87922	1.75364	1.87665	2.25415	1.22011	1.67511	0.981335	1.09184	0.484155	1.9751	0.63145	1.51721
YMR119W	36 - YMR119W ... ASI1 ubiquitin-dependent protein ca ubiquitin-protein ligase activity endoplasmic reticulum membrane | YMR119W-A	36	39	1.0068	1.31699	1.17995	1.30477	1.23397	1.34851	1.49084	1.70667	1.70558	1.47788	1.65178	1.58841	1.18359	1.22124	1.38993	1.13888	1.70888	1.42152
YLR201C	36 - YLR201C ˜ COQ9 biological process unknown molecular function unknown mitochondrion | Protein required for ubiquinone (coenzyme Q) biosynthesis and respiratory growth; localizes to the matrix face of the mitochondrial inner membrane in a large complex with ubiquinone biosynthetic enzymesYLR202C	36	39	1.30724	1.34823	1.31626	1.16797	1.59219	1.29383	1.73484	1.45344	1.47517	1.73914	1.75705	1.48615	1.22524	0.992805	1.33628	1.26744	1.31533	1.49578
YCR030C	39 - YCR030C ... SYP1 biological process unknown molecular function unknown bud neck* | YCR031C	39	39	1.46108	1.3605	1.43212	1.33509	1.46861	1.15514	2.07034	2.05316	2.05007	2.16927	1.98495	2.0275	1.84838	1.43626	1.7201	1.4583	1.57214	1.8213
YNL098C	39 - YNL098C ... RAS2 sporulation (sensu Fungi)* GTPase activity plasma membrane | YNL099C	39	39	1.25176	1.56763	1.45798	1.23497	1.22726	1.40013	2.09084	2.03144	2.55949	2.11502	2.25978	2.246	1.74754	1.49073	1.71551	1.06425	1.66048	1.45285
YER119C	39 - YER119C iESR cluster AVT6 amino acid transport amino acid transporter activity vacuole | YER119C-A	39	39	1.48999	1.35298	1.32729	1.4547	1.73762	1.48539	2.18606	2.15082	2.01491	2.07619	2.39884	1.98243	1.46795	1.40305	1.48537	1.27262	1.62006	1.64543
YKL193C	39 - YKL193C iESR cluster SDS22 chromosome segregation* enzyme regulator activity* cytoplasm* | YKL194C	39	39	1.50651	1.30843	1.60869	1.60668	1.26687	1.51023	2.06083	1.77252	1.91722	1.86084	1.90044	2.10166	1.55526	1.56818	1.60882	1.32408	1.66791	1.5672
YIR014W	39 - YIR014W ... YIR014W biological process unknown molecular function unknown vacuole (sensu Fungi) | YIR015W	39	39	1.40392	1.40108	1.37479	1.43981	1.2529	1.48569	1.38889	1.76873	1.48307	1.93057	1.82174	1.85055	1.20063	1.13434	1.42965	1.13197	1.45268	1.3068
YDR435C	39 - YDR435C ... PPM1 C-terminal protein amino acid C-terminal protein carboxyl methyltcellular component unknown | YDR436W	39	39	1.52324	1.24138	1.35518	1.44726	1.67462	1.12044	1.68996	2.04954	1.6259	1.68576	1.81771	1.68993	1.0832	1.2229	1.31675	1.02409	1.43271	1.28228
YJR091C	39 - YJR091C ... JSN1 mRNA catabolism, deadenylylati mRNA binding cellular component unknown | YJR092W	39	39	1.45913	1.39892	1.54598	1.49653	1.41601	1.19075	1.88829	1.68118	1.64419	2.00099	1.6805	1.95971	1.2731	1.09767	1.45993	1.07086	1.35184	1.40544
YDR251W	39 - YDR251W ... PAM1 pseudohyphal growth molecular function unknown bud neck* | YDR252W	39	39	1.31272	1.3183	1.27443	1.2544	1.12515	1.20303	1.87784	2.07572	1.75415	1.83811	1.57306	1.93383	1.25805	1.49571	1.50299	1.22544	1.44343	1.5461
YJL005W	39 - YJL005W ... CYR1 meiosis* adenylate cyclase activity mitochondrion* | YJL006C	39	39	1.20426	1.283	1.28448	1.12287	1.2233	1.30731	1.65364	2.06588	1.67667	1.87357	1.5778	1.89668	1.29678	1.47091	1.50483	1.20074	1.36377	1.33095
YOL087C	39 - YOL087C ... YOL087C biological process unknown molecular function unknown cytoplasm | YOL088C	39	39	1.23155	1.23524	1.44526	1.33141	1.28594	1.27985	1.6774	1.91421	1.73026	1.82441	1.78602	1.93477	1.16702	1.37706	1.55564	1.237	1.36732	1.35738
YFR045W	39 - YFR045W ... YFR045W transport transporter activity mitochondrial inner membrane | YFR046C	39	39	1.5948	1.31344	1.45177	1.52255	1.49405	1.40194	1.74047	1.73483	1.52937	1.87591	1.84541	1.82761	1.29723	1.34078	1.4222	1.22884	1.5882	1.25702
YOR352W	39 - YOR352W ... YOR352W biological process unknown molecular function unknown cytoplasm* | YOR353C	39	39	1.409	1.2248	1.36717	1.36256	1.12848	1.2657	1.47187	1.73091	1.67287	1.94291	1.51137	1.62218	1.11532	1.37638	1.4869	1.25812	1.30305	1.60899
YGR080W	39 - YGR080W ... TWF1 bipolar bud site selection* actin monomer binding actin cortical patch | YGR081C	39	39	1.45233	0.97035	1.32221	1.28917	1.42136	1.08347	1.72374	1.80408	1.47686	1.84333	1.71579	1.66982	1.35857	1.16277	1.48117	1.25516	1.42466	1.6897
YHR195W	39 - YHR195W ... NVJ1 microautophagy protein binding nuclear membrane | YHR196W	39	39	1.66936	1.36372	1.85792	1.07705	1.75379	1.48847	1.95772	1.92559	1.77907	2.02341	1.95543	1.82793	1.50791	1.41802	1.56002	1.22491	1.58569	1.55474
YDR185C	39 - YDR185C ˜ UPS3 biological process unknown molecular function unknown | Mitochondrial protein of unknown function; similar to Ups1p and Ups2p which are involved in regulation of mitochondrial cardiolipin and phosphatidylethanolamine levels; null is viable but interacts synthetically with ups1 and ups2 mutationsYDR186C	39	39	1.43966	1.52054	1.52646	1.5407	1.3611	1.38058	2.00657	2.1241	2.15295	1.96568	2.01875	2.11196	0.813145	0.833205	1.19322	0.938805	1.15243	1.3676
YOR228C	39 - YOR228C ... YOR228C biological process unknown molecular function unknown mitochondrion | YOR229W	39	39	1.48956	1.44788	1.44398	1.66926	1.44991	1.3281	1.80312	2.00893	1.90287	1.86919	1.72024	1.72321	0.735725	1.14663	1.13725	1.18929	1.29051	1.48277
YOL013C	39 - YOL013C ... HRD1 ER-associated protein cataboli ubiquitin-protein ligase activity endoplasmic reticulum membrane | YOL013W-A	39	39	1.5321	1.69984	1.65032	1.90967	1.24609	1.39734	1.76051	2.037	1.5245	1.88285	1.6532	1.93684	1.13956	1.32649	1.47151	1.17607	1.52444	1.45747
YAL060W	39 - YAL060W ... BDH1 butanediol fermentation "(R,R)-butanediol dehydrogenase acti"cytoplasm | YAL061W	39	39	1.12381	1.21313	1.37085	1.45807	1.50282	1.27527	1.97576	2.6788	1.98148	1.94346	2.01373	2.07544	0.915635	1.07943	1.13525	1.03452	1.28183	1.20165
YGL006W	39 - YGL006W iESR cluster PMC1 calcium ion homeostasis* calcium-transporting ATPase activitvacuolar membrane (sensu Fungi) | YGL006W-A	39	39	1.02495	1.11514	1.25595	1.28956	1.18398	1.27488	1.91834	2.53858	1.94758	2.13721	2.07478	2.18522	1.06136	1.25219	1.44952	0.834375	1.3987	1.40936
YBR287W	39 - YBR287W iESR cluster ZSP1 biological process unknown molecular function unknown endoplasmic reticulum | YBR288C	39	39	1.08679	1.28368	1.31245	1.49591	1.3074	1.23092	1.74067	2.24099	2.07268	1.75453	2.08001	1.94684	1.1361	1.23256	1.03872	1.04659	1.69438	1.30834
YBR269C	39 - YBR269C iESR cluster FMP21 biological process unknown molecular function unknown mitochondrion | YBR270C	39	39	1.32207	1.13316	1.33736	1.23369	1.5852	1.21893	1.78488	1.86105	1.63779	2.2046	2.08025	2.03161	1.40183	1.30736	1.70487	1.36844	1.45423	1.48806
YIL087C	39 - YIL087C ˜ AIM19 biological process unknown molecular function unknown | Putative protein of unknown function; the authentic, non-tagged protein is detected in purified mitochondria in high-throughput studies; null mutant displays reduced respiratory growthYIL088C	39	39	1.26456	1.27893	1.49104	1.52248	1.84227	1.34605	2.3053	2.19583	2.24238	1.8886	2.36785	1.98855	1.15867	1.2107	1.54595	1.34577	1.3379	1.64035
YGR149W	39 - YGR149W iESR cluster YGR149W biological process unknown molecular function unknown integral to membrane | YGR150C	39	39	1.74486	1.46988	1.62055	1.41659	1.54844	1.52582	2.30304	2.33812	2.14356	2.0263	2.00044	2.27273	1.16433	1.41965	1.36216	1.35065	1.58691	1.77243
YLR202C	39 - YLR202C ... | YLR203C	39	39	1.47152	1.21083	1.63168	1.30439	1.05312	1.38834	1.78174	1.41989	1.78344	1.99405	1.86894	1.56143	1.37677	1.29566	1.46547	1.52574	1.54367	1.60926
YBL049W	39 - YBL049W iESR cluster MOH1 biological process unknown molecular function unknown cellular component unknown | YBL050W	39	39	1.08534	1.74034	1.28931	1.26338	1.36152	1.24926	1.9904	1.941	1.91335	2.02629	2.07789	2.63898	1.3657	1.06402	1.10865	1.6601	1.12598	1.32623
YIR016W	39 - YIR016W ... YIR016W biological process unknown molecular function unknown cellular component unknown | YIR017C	39	39	1.38995	1.24385	1.26301	1.31735	1.89778	1.49396	2.45457	2.36471	1.86509	2.34349	2.4523	2.06698	1.08685	0.886275	0.945115	0.852805	1.31381	1.6097
YDR411C	39 - YDR411C ... DFM1 biological process unknown* molecular function unknown endoplasmic reticulum | YDR412W	39	39	1.40373	1.58549	1.51957	1.643	1.57742	0.882	1.95632	1.66519	1.8723	1.79516	1.87032	1.78087	1.30722	1.23497	1.50535	1.33848	1.36569	1.61345
YGL096W	39 - YGL096W iESR cluster TOS8 G1/S-specific transcription in transcription factor activity nucleus | YGL097W	39	39	1.57869	1.44656	1.50593	1.43899	1.42898	1.13676	1.79845	2.03929	1.51967	2.23615	1.34546	1.96525	0.740845	1.41329	0.975225	1.19172	1.18079	1.43524
YDR003W-A	39 - YDR003W-A ... YDR003W-A biological process unknown molecular function unknown cellular component unknown | YDR004W	39	39	1.73074	1.26059	1.46242	1.42159	1.46349	1.40891	1.54154	1.7533	1.59564	2.02311	1.79865	1.8674	0.957615	1.02449	1.40623	1.37356	1.25442	1.51419
YBR177C	39 - YBR177C ... EHT1 lipid metabolism serine hydrolase activity mitochondrion* | YBR178W	39	39	1.56352	1.13038	1.56973	1.38644	1.79107	1.30103	2.29945	2.33054	1.84215	1.98208	2.00859	2.24869	1.12584	1.16048	1.21327	0.788975	1.2145	1.29737
YDR504C	39 - YDR504C ... SPG3 biological process unknown molecular function unknown cellular component unknown | YDR505C	39	39	1.49359	1.35278	1.14802	1.33627	1.22514	1.20641	2.04828	2.38898	2.15327	1.91044	1.80139	1.75636	0.848835	1.3827	1.36408	0.784795	1.59231	1.08013
YOR292C	39 - YOR292C ... YOR292C biological process unknown molecular function unknown vacuole (sensu Fungi) | YOR293C-A	39	39	1.31067	1.38031	1.48488	1.67183	1.15896	1.07305	2.06401	2.47582	2.11189	2.33468	2.03573	2.27189	0.863065	0.978255	1.2707	1.41331	1.33167	1.18624
YPR098C	39 - YPR098C iESR cluster YPR098C biological process unknown molecular function unknown mitochondrion | YPR099C	39	39	1.49415	1.08655	1.30172	1.17159	1.68499	0.92622	2.14844	1.62299	1.73704	1.37156	2.04091	1.71542	0.850095	1.01977	1.02828	0.940105	1.39164	1.28521
YJL070C	40 - YJL070C ... YJL070C biological process unknown molecular function unknown cytoplasm* | YJL071W	40	39	1.89374	1.51499	1.87931	1.71715	1.79689	1.82298	2.70962	2.8438	2.46617	2.97289	2.39872	2.654	1.99382	2.43167	2.3043	1.83902	2.19074	2.28519
YMR280C	40 - YMR280C ... CAT8 positive regulation of transcr specific RNA polymerase II transcrinucleus | YMR281W	40	39	1.56063	2.35668	1.40312	1.79021	1.40853	2.05328	2.82246	2.82951	2.13392	3.13214	2.45394	3.11201	1.78903	2.12241	1.9383	2.64082	2.24073	2.04294
YPL203W	40 - YPL203W iESR cluster TPK2 protein amino acid phosphoryla protein serine/threonine kinase actcytoplasm* | YPL204W	40	39	2.37396	2.22812	2.39929	2.17871	2.31554	2.14634	2.63953	2.9162	2.35747	2.79232	2.59007	2.85412	2.34062	2.33716	2.6202	2.31258	2.54875	2.67543
YBR302C	40 - YBR302C ... COS2 biological process unknown molecular function unknown vacuole (sensu Fungi) | YCL001W	40	39	1.76929	2.22972	2.31362	2.25828	2.26304	1.77714	2.40542	3.09379	3.05368	2.44117	2.87341	3.00416	2.23434	2.29557	2.45647	2.18639	2.00581	3.03409
YNL305C	40 - YNL305C iESR cluster YNL305C biological process unknown molecular function unknown vacuole (sensu Fungi) | YNL306W	40	39	2.48453	2.51706	2.60751	2.50998	2.93529	2.47925	3.14724	2.77355	3.17665	2.64209	3.27562	2.99017	1.97311	1.87184	2.12491	1.85415	2.318	2.36699
YOL016C	40 - YOL016C ... CMK2 protein amino acid phosphoryla calcium- and calmodulin-dependent pcytoplasm | YOL017W	40	39	2.21489	2.26145	2.57255	2.58869	2.06822	2.07464	2.56979	2.95585	2.75563	3.00601	2.93599	3.09233	1.97738	1.98623	1.78622	1.39884	2.14236	2.46274
YFL062W	40 - YFL062W ... COS4 biological process unknown molecular function unknown vacuole (sensu Fungi) | YFL063W	40	39	1.99193	2.09671	2.14047	2.10165	2.06916	1.73534	2.83299	3.04246	3.03621	2.57097	2.90048	2.97334	2.01112	2.02351	2.56853	1.76188	2.34064	2.18047
YML132W	40 - YML132W ... COS3 sodium ion homeostasis protein binding vacuole (sensu Fungi)* | YML133C	40	39	1.77893	2.03461	2.18334	2.23047	2.17935	1.87732	2.90327	3.25895	3.20182	2.68196	2.85792	2.71378	1.78516	1.82515	2.10003	2.01634	2.10358	1.72028
[truncated: 2,070 more rows]

## Sheet: Parental_FuncEnch
Query Cluster	Comparison Cluster	pvalue	qvalue	Bonferroni pval (1169 tests)	Overlap	Cluster 1 size	Cluster2 size	Total Genes Assessed
[truncated: 312 more rows]

## Sheet: Parental_HotspotEncht
Query Cluster	Comparison Cluster	pvalue	qvalue	Bonferroni pval (38 tests)	Overlap	Cluster 1 size	Cluster2 size	Total Genes Assessed
[truncated: 71 more rows]
