# Supplementary material for: Genetic Architecture of Ethanol-Responsive Transcriptome Variation in Saccharomyces cerevisiae Strains
Source: Oxford University Press journal article supplement (doi:10.1534/genetics.114.167429), 2014-06-26
Supplement: genetics.114.167429-2.xls [file genetics.114.167429-2.xls]

## Sheet: Strain List
Strain	Background	Group	Genotype	Source	Ploidy
DBY8268	S288c derivative	Lab	S288C derivative (ura3-52/ura3D-1 ho/ho GAL2/GAL2)	David Botstein	diploid
BY4741	S288c derivative	Lab	S288C derivative (MATa ura3D-1 leu2D-0 met15D-0 his3D-1 ho)	Jasper Rine	haploid
YKO7228	S288c derivative	Lab	S288C derivative (MATa ura3D-1 leu2D-0 met15D-0 his3D-1 ho mkt1Δ::KanMX)	Open Biosystems	haploid
YPS163	wild strain	Oak	P. Sniegowski	Paul Sniegowski	diploid
YPS163-1	YPS163	Oak	YPS163 derivative (MATa hoΔ::HygMX)	this study	haploid
JL251	YPS163	Oak	YPS163 derivative (MATa hoΔ::HygMX mkt1Δ::KanMX)	this study	haploid
JL261	YPS163	Oak	YPS163 derivative (MATa hoΔ::HygMX MKT1-GFP::NatMX)	this study	haploid
JL263	BY4741	Lab	S288C derivative (MATa ura3D-1 leu2D-0 met15D-0 his3D-1 ho MKT1-GFP::NatMX)	this study	haploid
JL264	BY_mkt1Δ/YPS_MKT1 hemizygote	hybrid	YPS163/S288c hemizygous strain (BY_mkt1Δ/YPS_MKT1-GFP)	this study	diploid
JL265	YPS_mkt1Δ/BY_MKT1 hemizygote	hybrid	YPS163/S288c hemizygous strain (YPS_mkt1Δ/BY_MKT1-GFP)	this study	diploid
JL295	BY4741	Lab	S288C derivative (MATa ura3D-1 leu2D-0 met15D-0 his3D-1 ho MKT1-GFP::NatMX EDC3-RFP::KanMX)	this study	haploid
JL296	YPS163	Oak	YPS163 derivative (MATa hoΔ::HygMX MKT1-GFP::NatMX EDC3-RFP::KanMX)	this study	haploid
