# Supplementary material for: Genetic Architecture of Ethanol-Responsive Transcriptome Variation in Saccharomyces cerevisiae Strains
Source: Oxford University Press journal article supplement (doi:10.1534/genetics.114.167429), 2014-06-26
Supplement: genetics.114.167429-3.xls [file genetics.114.167429-3.xls]

## Sheet: Hotspot Peak Locations
Peak	Coordinates
1	chr1 43800
2	chr2 577025
3	chr3 91483
4	chr3 158096
5	chr4 213997
6	chr4 1488131
7	chr5 107387
8	chr5 361723
9	chr7 307777
10	chr7 775384
11	chr7 915885
12	chr8 64335
13	chr12 650065
14	chr12 1030560
15	chr13 31248
16	chr13 881128
17	chr14 463393
18	chr15 145732
19	chr15 654909
20	chr15 969990
21	chr16 56314
22	chr4 297722
23	chr4 1226777
24	chr7 421295
25	chr10 681348
26	chr11 367321
27	chr13 840042
28	chr14 731384
29	chr15 149065
30	chr15 251869
31	chr5 167338
32	chr8 37733
33	chr10 698054
34	chr4 300955
35	chr7 980817
36	chr3 62322
37	chr2 346877

## Sheet: Combined_Hotspot_Traits
Cluster_Peak1
YAR060C
YAL065C
YEL053W-A
YPR128C
YAL048C
YDR362C
YGL205W
YOR273C
YAR053W
YOR363C
YOR364W
YAL061W
YDR056C
YER015W
YKL181W
YBR148W
YGR264C
YMR246W
YIL160C
YDR118W-A
YJL188C
YAL056W
YIR033W
YOL101C
YHR213W-B
YJL199C
YML115C
YDR128W
YKL188C
YLR064W
YGR024C
YJL196C
YMR209C
YJL026W
YDR492W
YNR016C
YGR175C
YPL231W
YAL041W
YKL182W
YJR145C
YDR212W
YDR124W
YAL067C
YAL064W-B
YAL049C
YOR318C
YKL080W
YGL253W
YDR243C
YAR061W
YAL058W
YAL062W
Cluster_Peak2
YBR150C
YNR063W
YBR136W
YER035W
YDL110C
YNL327W
YKL008C
YFL021W
YOR316C-A
YJR147W
YDL049C
YBR158W
YBR144C
YNL066W
YMR173W
YER152C
YBR157C
YLR286C
YNR067C
YPR106W
YKR100C
YBR210W
YLR414C
YGL028C
YHR143W
YER153C
YBR151W
YGR041W
YJL078C
YER124C
YBR162W-A
YOR264W
YGR138C
YNL328C
YPR105C
YKL093W
YBR214W
YPR156C
YBR173C
YBR201W
YBR193C
YBR196C-A
YPR054W
YGL038C
YBR196C-B
YHR065C
YLR353W
YMR305C
YML077W
YBR188C
YBR167C
YBR176W
YBR229C
YOR342C
YBR148W
YBL095W
YJR146W
YNL277W-A
YGR067C
YBR137W
YDR274C
YNL028W
YGR044C
YML026C
YKL185W
YEL008W
YNL078W
YBR166C
YLR035C
YBR174C
YDL055C
YPR013C
YDL118W
YDR257C
YJL032W
YLR348C
YBR245C
YIL002C
YFL004W
YBR197C
YBR175W
YBR211C
YDL127W
YOR301W
YMR007W
YDL179W
YLR122C
YDR334W
YML052W
YHR178W
YPR005C
YLR398C
YLR286W-A
YBR203W
YGR198W
YBR085C-A
YDL006W
YOR298C-A
Cluster_Peak3
YNL196C
YOR256C
YNL123W
YML103C
YLR144C
YCL045C
YDR135C
YDL015C
YJL039C
YEL053W-A
YKR030W
YDL141W
YDR335W
YIL048W
YNL114C
YCL026C-B
YDR062W
YDL212W
YCL021W-A
YGL200C
YDR261W-A
YMR221C
YCL017C
YCL019W
YHR026W
YGR282C
YPR198W
YDR456W
YBR293W
YPR181C
YFR036W
YHR064C
YEL013W
YMR088C
YOR144C
YPR034W
YBR221C
YFL002W-B
YJR117W
YDL197C
YCL024W
YPR186C
YBL031W
YKL112W
YLR209C
YHR025W
YBR283C
YMR205C
YCL012C
YBL076C
YPL076W
YKL039W
YLR459W
YCL010C
YEL017C-A
YCR014C
YCR015C
YCL004W
YOR179C
YCR018C-A
YDR233C
YLL027W
YCR024C-B
YBR110W
YOR032W-A
YDR434W
YDR232W
YOR002W
YDR203W
YGR225W
YGR284C
YBR238C
YCL002C
YKL121W
YLL042C
YNR039C
YMR013C-A
YGL256W
YIL102C-A
YLR293C
YDR348C
YJR139C
YBR239C
YLR259C
YKR090W
Cluster_Peak4
YCR018C-A
YBR110W
YGR254W
YCL067C
YFL026W
YCR040W
YNL145W
YKL209C
YPL187W
YKL178C
YGL089C
YGL033W
YCR018C
YJR004C
YFL027C
YCR097W
YCL066W
YCL065W
YIL015W
YNL146C-A
YCR020C-A
YGL032C
YJL170C
YLR040C
YCR097W-A
YCR041W
YCR023C
YPL136W
YPR080W
YCR043C
YCR007C
YCR024C-B
YDR233C
YCL008C
YCR019W
YCR020W-B
YCR020C
Cluster_Peak5
YLR413W
YDL155W
YDR253C
YNL277W
YFR030W
YJR137C
YJR010W
YGR055W
YDL168W
YMR157C
YDR096W
YBR294W
YDL124W
YDL132W
YHR094C
YOR065W
YEL024W
YPR010C-A
YLL041C
YBL045C
YKL109W
YPR191W
YDL133W
YER028C
YDR529C
YDL103C
YDL088C
YDL109C
Cluster_Peak6
YMR075C-A
YDR524C
YDR530C
YDR531W
YLL066C
YDR540C
YBL113C
YLR466C-B
YLR467W
YPL283C
YEL075W-A
YNL339C
YFL066C
YBL111C
YLL067C
YPR204W
YML133C
YLR465C
YOR396W
YLR463C
YEL077C
YLR466W
YDR539W
YDR545W
YDR538W
YIL177C
YJL225C
YDR520C
YHR218W-A
YER190W
YGR296W
YHR219W
Cluster_Peak7
YHR043C
YEL052W
YEL041W
YEL042W
YEL040W
YJL130C
YEL037C
YCR094W
YBL042C
YNL065W
YNL018C
YLR420W
YNL034W
YKL216W
YDL048C
YEL038W
YOL143C
YMR043W
YEL021W
YMR008C
YHR092C
YOL126C
YER088C
YGL004C
YOR092W
YEL018W
YGR052W
YBL029W
YKL195W
YEL053C
YEL006W
YEL004W
YNR067C
YDR055W
YEL001C
YJL112W
YKL155C
YPR159W
YDR261C
YPR196W
YDL022W
YGR138C
YLR228C
YDR144C
YGL112C
YIL103W
YNL035C
YER111C
YPL147W
YKL163W
YAL054C
YGL121C
YMR185W
YGL205W
YER075C
YNL137C
YHR102W
YML130C
YLR460C
YCR005C
YPR026W
YDR344C
YIL160C
YIL155C
YNR018W
YKR056W
YDR123C
YJR046W
YEL044W
YNR027W
YOR262W
YEL020C
YPL265W
YJR113C
YHL038C
YGL036W
YGR043C
YDL085W
YMR323W
YKR009C
YMR175W
Cluster_Peak8
YDL035C
YKL008C
YNL100W
YPL113C
YGR288W
YJR153W
YLR437C
YMR177W
YDR232W
YDR216W
YFR018C
YDR031W
YPR134W
YIL114C
YGL056C
YGR088W
YDR044W
YMR042W
YMR070W
YOR215C
YDR258C
YMR280C
YBR201C-A
YBR085W
YNR073C
YBR238C
YLR408C
YLR312C
YOR044W
YMR011W
YDL049C
YOR010C
YOR313C
YOR317W
YDL245C
YOR356W
YEL070W
YMR145C
YJL198W
YGR230W
YKL093W
YDL039C
YDR380W
YER064C
YDR213W
YHR094C
YOR229W
YLL012W
YBL029C-A
YDL037C
YOR062C
YBR001C
YGL017W
YMR135C
YDR277C
YPR155C
YGL248W
YIL011W
YGL087C
YER037W
YGR213C
YPR149W
YNR009W
YDR079W
YOR330C
YER107C
YKR098C
YIL013C
YFL051C
YHR049W
YPR009W
YLR328W
YER097W
YMR173W
YIR019C
YPR015C
YDL066W
YPL026C
YGR249W
YNL179C
YMR173W-A
YFR006W
YPL177C
YDR259C
YPR091C
YHR047C
YDR046C
YNL234W
YJL164C
YPR013C
YMR036C
YBR269C
YER115C
YMR265C
YGL208W
YOL048C
YOR049C
YJR148W
YLR015W
YER105C
YOL151W
YBR230C
YPR127W
YBR177C
YER116C
YKL091C
YER114C
YKL036C
YKR102W
YCR051W
YCL047C
YER093C
YGR274C
YJL132W
YHL025W
YDL027C
YFL050C
YDR144C
YER053C
YDR398W
YPL147W
YAL027W
YNL132W
YBR125C
YEL046C
YER080W
YKL004W
YMR290C
YKL188C
YGL140C
YOL021C
YIL105C
YKL175W
YML125C
YJL118W
YGL044C
YCR028C
YKL191W
YOL108C
YHL011C
YBR076W
YML031W
YNL009W
YER110C
YHR042W
YKL142W
YJL048C
YOR262W
YNL123W
YHR149C
YGR225W
YER059W
YBR220C
YCR059C
YMR030W
YMR301C
YGR079W
YGR130C
YIL030C
YDR221W
YMR108W
YOR289W
YBR175W
YLR270W
YIL043C
YAL020C
YBR263W
YMR196W
YDL182W
YNL265C
YKL146W
YBL020W
YGR033C
YKL081W
YHR097C
YOR244W
YKR066C
YEL040W
YER100W
YKR009C
YBR285W
YPR008W
YMR104C
YIL094C
YBL057C
YDR119W-A
YNL023C
YER098W
YIL107C
YNR050C
YDR070C
YPR058W
YAL008W
YGR248W
YOR185C
YMR107W
YML128C
YFL015C
YDR463W
YDL198C
YKL110C
YIL077C
YMR016C
YHR022C
YHR139C
YOL058W
YOR271C
YBR115C
YPR157W
YIR039C
YCL009C
YDR267C
YHR140W
YDR005C
YDR197W
YOR352W
YNL195C
YMR210W
YOR147W
YBR054W
YHR132W-A
YFL014W
YOL054W
YLR234W
YKR042W
YNL221C
YEL036C
YPR074C
YER049W
YHR085W
YNL067W
YOL124C
YER131W
YLR344W
YHL033C
YML026C
YMR229C
YMR142C
YDL082W
YPL126W
YLR333C
YDR361C
YGR158C
YDR447C
YML113W
YIL158W
YBR104W
YLR448W
YDR347W
YLR293C
YGL076C
YLR191W
YPL207W
YLR185W
YPR133W-A
YNL247W
YER096W
YDR492W
YML081C-A
YJL158C
YJR121W
YBR084W
YJR077C
YBL009W
YKL189W
YBL015W
YBL030C
YKL211C
YER090W
YNR040W
YER089C
YML131W
YJL116C
YER001W
YFR015C
YDL076C
YER014W
YER109C
YMR136W
YER104W
YNL104C
YHR211W
YAR050W
YDR186C
YMR178W
YER017C
Cluster_Peak9
YBR200W
YNR041C
YJR070C
YLR107W
YJL222W
YIL173W
YHR050W
YGL186C
YDL054C
YDR456W
YNL186W
YGL124C
YDR240C
YML005W
YJR001W
YGL198W
YHR175W
YGL119W
YMR155W
YNL322C
YDR059C
YAL053W
YOR142W
YGL127C
YCR010C
YLR356W
YDR100W
YDL212W
YBR119W
YAL017W
YKR026C
YPR098C
YBL047C
YBR139W
YDL072C
YGL108C
YPL154C
YBR269C
YHR118C
YGL096W
YGL097W
YGL115W
YBR030W
YGL090W
YJR044C
YPR004C
YHR173C
YPR091C
YGL094C
YOL094C
YLR300W
YLR006C
YIR022W
YER151C
YGL225W
YNL024C-A
YDR208W
YGR063C
YIL006W
YBR235W
YEL027W
YGR282C
YDR410C
YPR181C
YNL127W
YDR387C
YOL105C
YCL002C
YPR113W
YOR085W
YGR002C
YOL030W
YGR199W
YDR404C
YPL070W
YDL128W
YMR088C
YMR292W
YJR143C
YLR220W
YBR243C
YFR019W
YMR215W
YAR002C-A
YKL162C-A
YGR203W
YGL012W
YHR026W
YIL009C-A
YOR067C
YOL092W
YLR381W
YCR067C
YGL112C
YHL017W
YHR151C
YBR212W
YKR088C
YPL184C
YKR065C
YBR287W
YBL075C
YDR330W
YGL117W
YDL017W
YCL032W
YGL100W
YPR068C
YLR400W
YGL098W
YGL083W
YDL180W
YGR193C
YBR283C
YOR034C
YBR086C
YLR260W
YNR006W
YDR352W
YGR100W
YIL090W
YDR249C
YHR061C
YGR101W
YJR125C
Cluster_Peak10
YAR028W
YAR030C
YGR125W
YGR127W
YAR035W
YAR033W
YKR069W
YLR303W
YGL051W
YBR294W
YDR253C
YER091C
YPR167C
YDL059C
YJR010W
YKL001C
YNL276C
YLL065W
YLR364W
YFR030W
YIL074C
YOL091W
YGL125W
YDR544C
YER043C
YJR137C
YLR092W
YLR180W
YNL277W
YGR154C
YGR156W
YJL101C
YJL060W
YLR094C
YJL212C
YIL046W-A
YKR027W
YGL196W
YGR158C
YGR170W
YDR391C
YJL116C
YLR257W
YMR071C
YGR080W
YGR126W
YBR213W
YKL201C
YGR131W
YGR055W
YGR100W
YKL068W-A
YIR017C
YIL046W
YOR100C
YER092W
YOL102C
YGR144W
YEL072W
YDR046C
YLL062C
YDR379C-A
YHR015W
YLR121C
YCL030C
YGR161C
YMR009W
YPL222C-A
YBR005W
YGR066C
YGR161W-C
YAL060W
YEL070W
YNR073C
Cluster_Peak11
YDL035C
YGR200C
YGR143W
YGR201C
YMR286W
YPR196W
YGL191W
YBR066C
YFL036W
YPR047W
YGR165W
YMR287C
YER050C
YHR038W
YOR354C
YLR439W
YGR174C
YNL284C
YDR175C
YHL004W
YML120C
YLR228C
YKR016W
YEL069C
YDR493W
YBR085W
YNL315C
YGR208W
YMR145C
YLR069C
YER182W
YDR322W
YDR237W
YIL093C
YOR150W
YGR112W
YHR116W
YLR163C
YLR382C
YHR011W
YDR375C
YGR084C
YMR188C
YHR005C-A
YCR003W
YDR494W
YPR151C
YML050W
YGR215W
YGR076C
YKL150W
YPR100W
YBR179C
YOL071W
YML054C
YOR215C
YBR282W
YBR183W
YGR207C
YKL018C-A
YBR238C
YGR221C
YGR229C
YLR073C
YGL011C
YGR275W
YMR090W
YMR083W
YLL001W
YGR198W
YDR436W
YGR171C
YIL155C
YCR024C
YMR293C
YJR100C
YGR210C
YNR050C
YJR046W
YLR437C
YBR044C
YLR294C
YKL093W
YHR059W
YIL157C
YLR125W
YGR213C
YGR245C
YJL070C
YIL014C-A
YHR134W
YMR260C
YGR232W
YFR001W
YDL213C
YKL082C
YER002W
YKL172W
YER029C
YDL099W
YDR429C
YNL136W
YLR051C
YDL065C
YJL115W
YOR216C
YPR018W
YIL116W
YDR176W
YJL206C
YLR240W
YOR078W
YLR045C
YLR438C-A
YGR246C
YER161C
YGR072W
YNL050C
YDR026C
YKL041W
YPL255W
YDR435C
YAL034W-A
YGR280C
YJR014W
YFL046W
Cluster_Peak12
YOR380W
YLL053C
YHL035C
YDR311W
YLL052C
YDR359C
YPL147W
YDR017C
YHL044W
YHL047C
YPL210C
YPL226W
YPL152W
YBR182C
YPL150W
YPL219W
YPL216W
YPL266W
YML111W
YPL253C
YPL277C
YDR040C
YPL204W
YPL167C
YPL194W
YPL123C
YPL126W
YPL203W
YHL022C
YPL227C
YPL207W
YPL166W
YPL212C
YOR389W
YPL180W
YPL209C
YPL174C
YPL235W
YPL195W
YPL259C
YPL188W
YPL263C
YPL193W
YPL161C
YPL213W
YPL191C
YPL243W
YPL112C
YPL120W
YPL115C
YPL225W
YHL031C
YPL241C
YPL125W
YPL138C
YPL262W
YPL179W
YPL159C
YPL169C
YPL242C
YPL160W
YPL106C
YPL208W
YPL176C
YPL145C
YPL100W
YPL164C
YPL116W
YPL260W
YPL234C
YPL158C
YPL117C
YPL228W
YJL128C
YPL196W
YPL127C
YHL006W-A
YPL168W
YGR262C
YPL218W
YHL014C
YPL149W
YHL010C
YPL118W
YGR060W
YHL007C
YML066C
YPL098C
YOR343C
YDR497C
YHR007C-A
YHR168W
YHL023C
YAL053W
YJL171C
YPR145C-A
YJL094C
YPL270W
YOR219C
YBR016W
YPL221W
YPL154C
YHR138C
YLR187W
YPL246C
YPL245W
YHL016C
YOR385W
YBL039W-B
YPL252C
YPL128C
YBR030W
YMR295C
YPL222C-A
YBR005W
YDR319C
YPL202C
YGL006W
YHR007C
YPL122C
YPL140C
YPL139C
YHL009C
YCR038W-A
YJL166W
YEL007W
YNL187W
YPL229W
YER173W
YPL271W
YKL197C
YHR156C
YLR195C
YIL092W
YKL092C
YJL016W
YPL269W
YLR455W
YKR010C
YOL112W
YOL011W
YEL061C
YBL096C
YOR104W
YBR007C
YIL144W
YHL008C
YCR089W
YPL192C
YKL048C
YOL023W
YFL016C
Cluster_Peak13
YOR201C
YDR270W
YLR225C
YPL231W
YLR452C
YNL280C
YDL089W
YHR039C
YPL028W
YAR073W
YGL101W
YBR264C
YKL182W
YJR042W
YJR105W
YOR241W
YHR216W
YKR069W
YNR073C
YMR110C
YJR010W
YML058W-A
YKL020C
YLR246W
YJR104C
YFR018C
YHR190W
YOR237W
YER043C
YGL191W
YDR502C
YLR245C
YDR275W
YOR171C
YDL178W
YOR010C
YDR213W
YER011W
YDR453C
YMR202W
YDL086W
YLR153C
YLR231C
YNL100W
YML126C
YMR038C
YCR073C
YGR266W
YML075C
YBR242W
YML120C
YHR048W
YGL055W
YPR191W
YNR043W
YLR380W
YMR302C
YJL100W
YMR208W
YMR015C
YEL051W
YBR183W
YMR177W
YHR051W
YFR022W
YBR201C-A
YGR060W
YMR220W
YBR059C
YMR145C
YBL093C
YML008C
YDR216W
YGL039W
YEL020W-A
YPR065W
YIL031W
YNL052W
YMR134W
YGL056C
YNR019W
YOR065W
YDL174C
YLL058W
YNL156C
YCR048W
YLR038C
YDR044W
YGR223C
YHR075C
YLR256W
YJL048C
YGL187C
YBR161W
YFL036W
YGR182C
YGR183C
YLR265C
YPR151C
YLR205C
YLR050C
YDR261C
YBL030C
YEL034W
YFR033C
YLR100W
YOR348C
YLR395C
YJL167W
YBR085W
YER044C
YKR046C
YIL066C
YMR214W
YNL111C
YOR229W
YDR119W-A
YKL072W
YJR091C
YMR070W
YMR009W
YJR048W
YML054C
YGL001C
YHR179W
YHR007C
YDR297W
YPR010C-A
YDL093W
YDR538W
YEL024W
YBR120C
YBR146W
YAL028W
YML021C
YER053C-A
YML050W
YMR286W
YOR387C
YOR230W
YEL047C
YER141W
YOR377W
YIR007W
YDL086C-A
YOL026C
YDR529C
YNL279W
YJL180C
YKL170W
YDR518W
YHR005C-A
YBR044C
YMR024W
YNL208W
YLR450W
YLR312W-A
YER014W
YKL109W
YDR322W
YER142C
YPR152C
YML047C
YKL150W
YDR186C
YPL215W
YHR072W
YJR126C
YGR281W
YDR462W
YLR228C
YLR069C
YOR066W
YIL070C
YLR425W
YEL038W
YBL038W
YGR049W
YKL167C
YDR511W
YGR202C
YEL039C
YMR188C
YLR253W
YER096W
YNL315C
YBR268W
YGR076C
YLR255C
YLR168C
YCL055W
YJR101W
YGR084C
YGL144C
YGR097W
YEL001C
YHL004W
YGL068W
YKL008C
YEL050C
YMR232W
YOR158W
YCR089W
YOR037W
YDR337W
YML057W
YOR197W
YBL043W
YDR047W
YDR175C
YDR437W
YLR287C
YDR323C
YOR321W
YMR193W
YER058W
YMR298W
YML125C
YGR143W
YIL157C
YKL080W
YIL093C
YDR493W
YJL107C
YPL257W
YOL059W
YLR272C
YDR384C
YDL100C
YLR275W
YPL252C
YDL133W
YDL193W
YEL066W
YNL222W
YOR334W
YDR013W
YNL014W
YLR237W
YOR303W
YLR199C
Q0255
YIL001W
YLR241W
YMR016C
YJR150C
YDL236W
YGR028W
YGL160W
YBR163W
YLR300W
YLR244C
YLR281C
YKL031W
YLR248W
YPR150W
YFR015C
YIR029W
YLR413W
YLR154C
YHR116W
YLL055W
YGL188C
YFL058W
YJR047C
YJL198W
YNR041C
YIL111W
YJR110W
YJR023C
YNL332W
YJR156C
YKL038W
YDL244W
YMR256C
YMR171C
YDR011W
YJR124C
YOR317W
YML054C-A
YBR182C-A
YHR001W-A
YLR034C
YOR356W
YJL166W
YHR007C-A
YGL122C
YBR062C
YMR080C
YNR007C
YER053C
YDL210W
YLR092W
YNL124W
YGL022W
YJL044C
YHR131C
YHR008C
YGL040C
YDR232W
YPL189C-A
YKR047W
YLR326W
YFR038W
YDL110C
YPR193C
YLR432W
YML081W
YCR005C
YHR137W
YPL013C
YHR155W
YDR004W
YDR544C
YLR169W
YGR234W
YGR052W
YDR345C
YEL071W
YML101C
YOR049C
YMR184W
YBR203W
YNR026C
YJL101C
YLR141W
YMR102C
YPR124W
YDL124W
YOR187W
YBL099W
YJR116W
YBL111C
YJR121W
YLR446W
YLL013C
YPR202W
YJL143W
YDR492W
YLR464W
YOR378W
YHR218W
YEL044W
YIL037C
YHL049C
YLR214W
YGR088W
YLR250W
YNR036C
YDR471W
YNR017W
YGR041W
YHR109W
YGL157W
YER081W
YBR192W
YNR074C
YLR466C-B
YLL012W
YJL062W-A
YNR040W
YJL222W
YNL155W
YOL033W
YOL113W
YDR375C
YIL173W
YNL018C
YBR200W
YCR046C
YHR001W
YOR316C-A
YGR257C
YDR347W
YGL236C
YHR202W
Cluster_Peak14
YLR446W
YHR185C
YDR545C-A
YHL050W-A
YOR396C-A
YBL113W-A
YLR456W
YLL066C
YLR459W
YGR296C-B
YBL113C
YHR219C-A
YLR466C-B
YLR467W
YNL339W-B
YER190C-B
YER190W
YPL283C
YGR296W
YPL283W-B
YEL077W-A
YEL075W-A
YNL339C
YFL066C
YHR219W
YLL066W-A
YIL177W-A
YBL111C
YLL067C
YPR204W
YML133W-B
YML133C
YLR457C
YLR465C
YOR396W
YPR204C-A
YLR467C-A
YLR466W
YFL068W
YLL067W-A
YLR466C-A
YHL050C
YJL225W-A
YDR545W
YIL177C
YLR463C
YLR460C
Cluster_Peak15
YHR215W
YLR139C
YBR092C
YHR136C
YAR070C
YNL043C
YDR061W
YJL012C
YGR169C
YLR410W
YFL004W
YPL018W
YOR155C
YOR163W
YER072W
YHR214C-E
YAR071W
YBR028C
YBR093C
YNR069C
YML123C
YKR080W
YDR481C
YPL019C
YER037W
YDR247W
YPL110C
YOL125W
YPL066W
YDR281C
YAR069C
YJL117W
YBR296C
YNR055C
YCR011C
YIL073C
YJL119C
YGR233C
YCR037C
YKL051W
YHR214C-D
YJL079C
YPL250C
YER004W
YML116W
YER073W
YIR034C
YJR059W
YGL224C
YBR050C
YIL074C
YBR297W
YDR019C
YER055C
YLR267W
YOL082W
YHR183W
YCL064C
YML111W
YIL050W
YMR120C
YLR142W
YIL051C
YLR089C
YOL140W
YDR111C
YOL058W
YJL088W
YLR174W
YBR133C
YDR042C
YOL055C
YCR045C
YPL136W
YLL042C
YCL024W
YIR006C
YER078W-A
YLR137W
YPR167C
YGR156W
YOR033C
YNL251C
YGR010W
YOR366W
YMR061W
YDL154W
YLR268W
YMR189W
YAL044C
YLR348C
YBL106C
YBR208C
YER081W
YOL123W
YLR092W
YCR038W-A
YBR222C
YNL104C
YML079W
YAL044W-A
YML097C
YML096W
YER069W
YER061C
YER068C-A
YPL061W
YOR083W
YOR396C-A
YKL064W
YHR007C-A
YER060W
YIL177W-A
YDR004W
YDR374W-A
YER119C
YMR040W
YBR091C
YDL057W
YML124C
YML133W-B
YML005W
YGL170C
YLL067W-A
YDL109C
YPL283W-B
YLR467C-A
YHL042W
YPR121W
YLR438W
YLR466C-A
YHR219C-A
YHL050W-A
YPL056C
YFL068W
YDR545C-A
YBL113W-A
YEL077W-A
YPR204C-A
YNL339W-B
YGR296C-B
YFL067W
YHR069C-A
YLL066W-A
YER190C-B
YJL225W-A
YDR185C
YOR349W
YML089C
YDR173C
YBL001C
YPL003W
Cluster_Peak16
YKR082W
YJL111W
YMR282C
YOR190W
YGR296C-A
YDR138W
YMR293C
YMR258C
YGR257C
YIR016W
YER075C
YMR316C-A
YER174C
YBR207W
YMR312W
YMR319C
YDR270W
YHL040C
YHR045W
YMR320W
YMR316C-B
YKL220C
YER145C
YFL041W
YPL274W
Cluster_Peak17
YNR031C
YOR138C
YBL013W
YGL163C
YJL194W
YFL034W
YER114C
YGL085W
YLR095C
Q0255
YOR143C
YLR045C
YBR294W
YNL113W
YMR081C
YNL076W
YGL125W
YDR075W
Q0110
YNL306W
YBL032W
YBR108W
YBR289W
YMR162C
YOR128C
YDR221W
YOL051W
YFL033C
Q0105
YLR024C
YNL090W
YJR066W
YNL142W
YML010W
YIL156W
YJR100C
YBL023C
YML018C
YHR057C
Q0045
YKR069W
YLR305C
YLR055C
YNL102W
Q0060
YLR106C
Q0297
YOR323C
Q0055
YLR174W
Q0250
YMR097C
YBR275C
YJR103W
YLR337C
YKL152C
YKL049C
YML034W
YOR025W
YKL214C
YJR092W
YJR138W
Q0275
YGL180W
YLL036C
YLR187W
YOR362C
YGL093W
YGR271C-A
YCR032W
YAR019C
YPL085W
YGR184C
YOR290C
YDR322C-A
YBR090C
YDL107W
YIL096C
YOR274W
YNL106C
YDR097C
YGL022W
YBR059C
YBR136W
YGR061C
YNL118C
YNL123W
YJL099W
YDR180W
YDL193W
YLR068W
YPR035W
YHR186C
YNL243W
YGL251C
YNL101W
YDR206W
YML013W
YLR028C
YKL203C
YOR334W
YHR005C-A
YPL160W
YMR276W
YMR281W
YNL049C
YFR019W
YDR146C
YBR201W
YNL262W
YIL115C
YPL081W
YKL171W
YBR196C
YGR178C
YOR004W
YOR145C
YIL129C
YLR359W
YGR271W
YHL038C
YLR027C
YER013W
YKL092C
YNL095C
YDR282C
YJL125C
YGR204W
YOR153W
YBR140C
YCL037C
YGL013C
YHR165W-A
YJL180C
YIL075C
YHL018W
YBR122C
YBR222C
YDR457W
YLR008C
YLR183C
YPR125W
YML012W
YPL106C
YMR087W
YBL090W
YMR291W
YOL115W
YGR076C
YOL042W
YHR165C
YLR422W
YPR103W
YML108W
YCR036W
YDR339C
YOR043W
YDR050C
YBR120C
YFL007W
YPR008W
YNL002C
YDR197W
YMR158W
YHR027C
YDR084C
YBL038W
YGR098C
YNL177C
YMR193W
YDL202W
YGR047C
YGR220C
YHR073W
YOR197W
YOR184W
YMR178W
YDL160C
YHR073W-A
YEL001C
YHR109W
YCR081W
YDR284C
YGL157W
YHR059W
YDR425W
YML030W
YMR316W
YER021W
YNL287W
YER058W
YKL155C
YDR493W
YPL154C
YDL140C
YMR188C
YNL075W
YAL044C
YNL252C
YOR205C
YCL045C
YAL016W
YLR163C
YDL072C
YBR153W
YOL023W
[truncated: 1,790 more rows]

## Sheet: Hotspot_FuncEnch
Query Cluster	Comparison Cluster	pvalue	Bonferroni pval (1174 tests)	Overlap	Cluster 1 size	Cluster2 size	Total Genes Assessed
Cluster_Peak1	Cluster_FattyAcid_APGcategory	2.15855e-10	2.53414e-07	8	53	35	6532
Cluster_Peak1	Cluster_fatty_acid_metabolic_process_GO	7.82642e-07	0.000918822	4	53	10	6532
Cluster_Peak1	Cluster_peroisome_GO	0.000117419	0.13785	4	53	32	6532
Cluster_Peak1	Cluster_fatty_acid_beta-oidation_GO	0.000635998	0.746661	2	53	5	6532
Cluster_Peak1	Cluster_lipid_metabolic_process_GO	0.000696651	0.817868	3	53	22	6532
Cluster_Peak1	Cluster_peroisomal_matri_GO	0.00175318	2.05823	2	53	8	6532
Cluster_Peak1	Cluster_metabolic_process_GO	0.00194117	2.27893	5	53	111	6532
Cluster_Peak1	Cluster_ligase_activity_GO	0.00403237	4.73401	3	53	40	6532
Cluster_Peak1	Cluster_TATAcontaining_APGcategory	0.00406009	4.76654	17	53	1085	6532
Cluster_Peak1	Cluster_catalytic_activity_GO	0.00631149	7.40968	5	53	146	6532
Cluster_Peak1	Cluster_nucleotide_binding_GO	0.00906735	10.6451	7	53	294	6532
Cluster_Peak1	Cluster_calcium_ion_binding_GO	0.00909533	10.6779	2	53	18	6532
Cluster_Peak10	Cluster_methionine_biosynthetic_process_GO	3.35901e-09	3.94348e-06	5	74	7	6532
Cluster_Peak10	Cluster_Spellman_S_peak	7.93049e-08	9.3104e-05	9	74	71	6532
Cluster_Peak10	Cluster_TATAcontaining_APGcategory	2.05326e-07	0.000241052	31	74	1085	6532
Cluster_Peak10	Cluster_cysteine_biosynthetic_process_GO	1.37352e-05	0.0161252	3	74	5	6532
Cluster_Peak10	Cluster_methionine_metabolic_process_GO	2.72466e-05	0.0319875	3	74	6	6532
Cluster_Peak10	Cluster_amino_acid_biosynthetic_process_GO	0.000114185	0.134054	4	74	23	6532
Cluster_Peak10	Cluster_sulfate_assimilation_GO	0.00123858	1.45409	2	74	5	6532
Cluster_Peak10	Cluster_GenesWithParalogs_E-100_APGcategory	0.0012823	1.50542	9	74	236	6532
Cluster_Peak10	Cluster_cellular_aromatic_compound_metabolic_process_GO	0.00138548	1.62656	3	74	20	6532
Cluster_Peak10	Cluster_nitrogen_compound_metabolic_process_GO	0.00184425	2.16515	2	74	6	6532
Cluster_Peak10	Cluster_SGD-nonessentials_APGcategory	0.00201292	2.36317	64	74	4683	6532
Cluster_Peak10	Cluster_Spellman_S/G2_peak	0.00208454	2.44725	6	74	118	6532
Cluster_Peak10	Cluster_organic_acid_metabolic_process_GO	0.00256303	3.009	2	74	7	6532
Cluster_Peak11	Cluster_MitochondrialRPs_APGcategory	4.2041e-09	4.93562e-06	11	126	54	6532
Cluster_Peak11	Cluster_SGD-nonessentials_APGcategory	0.000329389	0.386703	107	126	4683	6532
Cluster_Peak11	Cluster_tRNAsynth_APGcategory	0.0024529	2.87971	4	126	30	6532
Cluster_Peak11	Cluster_mitochondrial_translation_GO	0.0026913	3.15958	3	126	15	6532
Cluster_Peak12	Cluster_Spellman_S_peak	0.00021974	0.257975	8	152	71	6532
Cluster_Peak12	Cluster_protein_tyrosine_kinase_activity_GO	0.000403736	0.473986	3	152	7	6532
Cluster_Peak12	Cluster_protein_serine/threonine_kinase_activity_GO	0.000541314	0.635503	7	152	62	6532
Cluster_Peak12	Cluster_protein_kinase_activity_GO	0.000541314	0.635503	7	152	62	6532
Cluster_Peak12	Cluster_protein_amino_acid_phosphorylation_GO	0.000722973	0.84877	7	152	65	6532
Cluster_Peak12	Cluster_SGD-nonessentials_APGcategory	0.000840321	0.986536	126	152	4683	6532
Cluster_Peak12	Cluster_ATP_binding_GO	0.000914322	1.07341	14	152	231	6532
Cluster_Peak12	Cluster_nucleotide_binding_GO	0.00125863	1.47763	16	152	294	6532
Cluster_Peak12	Cluster_MAP_kinase_kinase_activity_GO	0.0015894	1.86596	2	152	3	6532
Cluster_Peak12	Cluster_kinetochore_microtubule_GO	0.0015894	1.86596	2	152	3	6532
Cluster_Peak12	Cluster_FAD_transport_GO	0.0015894	1.86596	2	152	3	6532
Cluster_Peak12	Cluster_FAD_transmembrane_transporter_activity_GO	0.0015894	1.86596	2	152	3	6532
Cluster_Peak12	Cluster_kinase_activity_GO	0.00246792	2.89733	7	152	80	6532
Cluster_Peak12	Cluster_condensed_nuclear_chromosome_kinetochore_GO	0.0029766	3.49452	3	152	13	6532
Cluster_Peak12	Cluster_macroautophagy_GO	0.0029766	3.49452	3	152	13	6532
Cluster_Peak12	Cluster_spindle_microtubule_GO	0.00313007	3.6747	2	152	4	6532
Cluster_Peak12	Cluster_steroid_biosynthetic_process_GO	0.00372424	4.37226	3	152	14	6532
Cluster_Peak12	Cluster_spindle_GO	0.00372424	4.37226	3	152	14	6532
Cluster_Peak12	Cluster_ion_transport_GO	0.00482183	5.66083	4	152	30	6532
Cluster_Peak12	Cluster_chromatin_remodeling_comple_GO	0.00513718	6.03105	2	152	5	6532
Cluster_Peak12	Cluster_fungal-type_cell_wall_biogenesis_GO	0.00513718	6.03105	2	152	5	6532
Cluster_Peak12	Cluster_Ras_GTPase_activator_activity_GO	0.00513718	6.03105	2	152	5	6532
Cluster_Peak12	Cluster_sterol_biosynthetic_process_GO	0.00553751	6.50104	3	152	16	6532
Cluster_Peak12	Cluster_hyperosmotic_response_GO	0.00758842	8.90881	2	152	6	6532
Cluster_Peak12	Cluster_CVT_pathway_GO	0.00779902	9.15605	3	152	18	6532
Cluster_Peak13	Cluster_Sterols_APGcategory	2.593e-18	3.04418e-15	19	376	27	6532
Cluster_Peak13	Cluster_TATAcontaining_APGcategory	1.30026e-12	1.5265e-09	116	376	1085	6532
Cluster_Peak13	Cluster_MitochondrialRPs_APGcategory	5.12194e-12	6.01315e-09	20	376	54	6532
Cluster_Peak13	Cluster_sterol_biosynthetic_process_GO	6.71513e-11	7.88356e-08	11	376	16	6532
Cluster_Peak13	Cluster_ergosterol_biosynthetic_process_GO	8.71273e-11	1.02287e-07	10	376	13	6532
Cluster_Peak13	Cluster_lipid_biosynthetic_process_GO	1.71985e-10	2.01911e-07	13	376	25	6532
Cluster_Peak13	Cluster_steroid_biosynthetic_process_GO	2.89403e-10	3.39759e-07	10	376	14	6532
Cluster_Peak13	Cluster_SGD-nonessentials_APGcategory	5.229e-10	6.13885e-07	319	376	4683	6532
Cluster_Peak13	Cluster_mitochondrial_electron_transport,_ubiquinol_to_cytochrome_c"_GO	3.53327e-08	4.14806e-05	6	376	6	6532
Cluster_Peak13	Cluster_mitochondrial_respiratory_chain_comple_III_GO	2.33307e-07	0.000273902	6	376	7	6532
Cluster_Peak13	Cluster_mitochondrial_respiratory_chain_GO	2.33307e-07	0.000273902	6	376	7	6532
Cluster_Peak13	Cluster_oidation_reduction_GO	2.08142e-06	0.00244358	17	376	80	6532
Cluster_Peak13	Cluster_heme_biosynthetic_process_GO	3.52282e-06	0.00413579	5	376	6	6532
Cluster_Peak13	Cluster_ubiquinol-cytochrome-c_reductase_activity_GO	3.52282e-06	0.00413579	5	376	6	6532
Cluster_Peak13	Cluster_cellular_alcohol_metabolic_process_GO	6.02892e-06	0.00707795	6	376	10	6532
Cluster_Peak13	Cluster_heme_binding_GO	1.26215e-05	0.0148176	6	376	11	6532
Cluster_Peak13	Cluster_oidoreductase_activity_GO	1.81465e-05	0.021304	15	376	75	6532
Cluster_Peak13	Cluster_electron_transport_chain_GO	2.32912e-05	0.0273438	7	376	17	6532
Cluster_Peak13	Cluster_Heme_APGcategory	2.98418e-05	0.0350343	5	376	8	6532
Cluster_Peak13	Cluster_mitochondrial_inner_membrane_GO	3.89399e-05	0.0457155	13	376	62	6532
Cluster_Peak13	Cluster_isoprenoid_biosynthetic_process_GO	5.16146e-05	0.0605955	4	376	5	6532
Cluster_Peak13	Cluster_aerobic_respiration_GO	5.45645e-05	0.0640587	7	376	19	6532
Cluster_Peak13	Cluster_mitochondrion_GO	6.12022e-05	0.0718514	38	376	343	6532
Cluster_Peak13	Cluster_iron_ion_binding_GO	0.000514991	0.604599	9	376	42	6532
Cluster_Peak13	Cluster_phosphorus_metabolic_process_GO	0.000538961	0.63274	5	376	13	6532
Cluster_Peak13	Cluster_cell_death_GO	0.000538961	0.63274	5	376	13	6532
Cluster_Peak13	Cluster_electron_carrier_activity_GO	0.000679036	0.797189	6	376	20	6532
Cluster_Peak13	Cluster_porphyrin_biosynthetic_process_GO	0.00072489	0.851021	3	376	4	6532
Cluster_Peak13	Cluster_GenesWithParalogs_E-100_APGcategory	0.00214417	2.51726	25	376	236	6532
Cluster_Peak13	Cluster_cellular_metabolic_compound_salvage_GO	0.00368585	4.32719	8	376	45	6532
Cluster_Peak13	Cluster_FAD_binding_GO	0.00369499	4.33791	4	376	12	6532
Cluster_Peak13	Cluster_potassium_ion_binding_GO	0.0055652	6.53355	3	376	7	6532
Cluster_Peak13	Cluster_ScParalogs_E-10_APGcategory	0.00787732	9.24798	107	376	1511	6532
Cluster_Peak13	Cluster_tetrapyrrole_biosynthetic_process_GO	0.0095398	11.1997	2	376	3	6532
Cluster_Peak14	Cluster_GenesWithParalogs_E-100_APGcategory	1.03919e-14	1.22001e-11	18	47	236	6532
Cluster_Peak14	Cluster_telomere_maintenance_via_recombination_GO	2.07152e-12	2.43197e-09	7	47	14	6532
Cluster_Peak14	Cluster_DNA_helicase_activity_GO	6.83117e-12	8.0198e-09	7	47	16	6532
Cluster_Peak14	Cluster_ATP-dependent_helicase_activity_GO	9.86013e-11	1.15758e-07	7	47	22	6532
Cluster_Peak14	Cluster_helicase_activity_GO	1.1734e-08	1.37757e-05	7	47	41	6532
Cluster_Peak14	Cluster_Spellman_G1_peak	7.26309e-07	0.000852687	12	47	295	6532
Cluster_Peak14	Cluster_Spellman_M-G1_peak	1.12145e-06	0.00131659	8	47	113	6532
Cluster_Peak14	Cluster_nucleic_acid_binding_GO	6.93578e-06	0.00814261	7	47	102	6532
Cluster_Peak14	Cluster_hydrolase_activity_GO	0.00107159	1.25805	7	47	227	6532
Cluster_Peak14	Cluster_ATP_binding_GO	0.00118692	1.39344	7	47	231	6532
Cluster_Peak14	Cluster_nucleotide_binding_GO	0.00465279	5.46238	7	47	294	6532
Cluster_Peak14	Cluster_ScParalogs_E-10_APGcategory	0.00595322	6.98908	19	47	1511	6532
Cluster_Peak15	Cluster_vacuolar_transporter_chaperone_comple_GO	2.83354e-07	0.000332658	4	152	4	6532
Cluster_Peak15	Cluster_Arginine_APGcategory	6.05628e-07	0.000711008	6	152	15	6532
Cluster_Peak15	Cluster_acid_phosphatase_activity_GO	1.24312e-05	0.0145942	3	152	3	6532
Cluster_Peak15	Cluster_microautophagy_GO	5.3078e-05	0.0623135	4	152	10	6532
Cluster_Peak15	Cluster_cellular_aromatic_compound_metabolic_process_GO	7.46765e-05	0.0876702	5	152	20	6532
Cluster_Peak15	Cluster_TATAcontaining_APGcategory	0.000182469	0.214219	43	152	1085	6532
Cluster_Peak15	Cluster_membrane_fusion_GO	0.000234711	0.275551	3	152	6	6532
Cluster_Peak15	Cluster_vacuolar_transport_GO	0.000668689	0.785041	4	152	18	6532
Cluster_Peak15	Cluster_phosphate_metabolic_process_GO	0.000936234	1.09914	3	152	9	6532
Cluster_Peak15	Cluster_GenesWithParalogs_E-100_APGcategory	0.00112601	1.32194	14	152	236	6532
Cluster_Peak15	Cluster_glycine_cleavage_comple_GO	0.0015894	1.86596	2	152	3	6532
Cluster_Peak15	Cluster_glycine_dehydrogenase_(decarboylating)_activity_GO	0.0015894	1.86596	2	152	3	6532
Cluster_Peak15	Cluster_Thiamine_APGcategory	0.00177704	2.08625	3	152	11	6532
Cluster_Peak15	Cluster_vacuole_fusion,_non-autophagic"_GO	0.0020831	2.44556	4	152	24	6532
Cluster_Peak15	Cluster_glycine_metabolic_process_GO	0.00313007	3.6747	2	152	4	6532
Cluster_Peak15	Cluster_arginine_metabolic_process_GO	0.00513718	6.03105	2	152	5	6532
Cluster_Peak15	Cluster_vacuolar_membrane_GO	0.00633978	7.4429	5	152	51	6532
Cluster_Peak15	Cluster_cellular_aldehyde_metabolic_process_GO	0.00758842	8.90881	2	152	6	6532
Cluster_Peak15	Cluster_transaminase_activity_GO	0.00758842	8.90881	2	152	6	6532
Cluster_Peak15	Cluster_protein_binding,_bridging"_GO	0.00779902	9.15605	3	152	18	6532
Cluster_Peak16	Cluster_mRNA_eport_from_nucleus_GO	0.00611006	7.17321	2	25	31	6532
Cluster_Peak17	Cluster_MitochondrialRPs_APGcategory	6.33563e-27	7.43803e-24	47	1264	54	6532
Cluster_Peak17	Cluster_SGD-nonessentials_APGcategory	4.83402e-14	5.67514e-11	1011	1264	4683	6532
Cluster_Peak17	Cluster_mitochondrion_GO	4.33449e-12	5.0887e-09	119	1264	343	6532
Cluster_Peak17	Cluster_mitochondrial_translation_GO	3.59945e-08	4.22575e-05	13	1264	15	6532
Cluster_Peak17	Cluster_mitochondrial_large_ribosomal_subunit_GO	7.31112e-08	8.58325e-05	10	1264	10	6532
Cluster_Peak17	Cluster_binding_GO	2.69465e-07	0.000316352	44	1264	109	6532
Cluster_Peak17	Cluster_ATP_binding_GO	4.28387e-06	0.00502926	73	1264	231	6532
Cluster_Peak17	Cluster_tRNAsynth_APGcategory	6.20974e-06	0.00729023	17	1264	30	6532
Cluster_Peak17	Cluster_nucleotide_binding_GO	1.02552e-05	0.0120396	87	1264	294	6532
Cluster_Peak17	Cluster_endocytosis_GO	3.34637e-05	0.0392864	17	1264	33	6532
Cluster_Peak17	Cluster_endopeptidase_activity_GO	7.04091e-05	0.0826603	12	1264	20	6532
Cluster_Peak17	Cluster_protein_serine/threonine_kinase_activity_GO	0.000104638	0.122845	25	1264	62	6532
Cluster_Peak17	Cluster_Proteasome_APGcategory	0.000241162	0.283125	15	1264	31	6532
Cluster_Peak17	Cluster_transferase_activity_GO	0.00027563	0.323589	62	1264	212	6532
Cluster_Peak17	Cluster_kinase_activity_GO	0.000280574	0.329394	29	1264	80	6532
Cluster_Peak17	Cluster_protein_kinase_activity_GO	0.000300019	0.352223	24	1264	62	6532
Cluster_Peak17	Cluster_hydrolase_activity,_acting_on_ester_bonds"_GO	0.00030419	0.35712	6	1264	7	6532
Cluster_Peak17	Cluster_protein_comple_GO	0.000424053	0.497838	12	1264	23	6532
Cluster_Peak17	Cluster_G2/M_transition_of_mitotic_cell_cycle_GO	0.000452615	0.53137	8	1264	12	6532
Cluster_Peak17	Cluster_nucleoside-triphosphatase_activity_GO	0.000488432	0.573419	21	1264	53	6532
Cluster_Peak17	Cluster_cytoskeleton_GO	0.000560045	0.657492	18	1264	43	6532
Cluster_Peak17	Cluster_protein_catabolic_process_GO	0.000680033	0.798358	10	1264	18	6532
Cluster_Peak17	Cluster_proteasome_regulatory_particle,_base_subcomple"_GO	0.000692739	0.813275	7	1264	10	6532
Cluster_Peak17	Cluster_metallopeptidase_activity_GO	0.00113419	1.33154	9	1264	16	6532
Cluster_Peak17	Cluster_mitochondrial_genome_maintenance_GO	0.00113419	1.33154	9	1264	16	6532
Cluster_Peak17	Cluster_peptidase_activity_GO	0.00122009	1.43239	19	1264	49	6532
Cluster_Peak17	Cluster_vacuole_GO	0.00124491	1.46152	22	1264	60	6532
Cluster_Peak17	Cluster_etrinsic_to_membrane_GO	0.00189561	2.22545	8	1264	14	6532
Cluster_Peak17	Cluster_ATPase_activity_GO	0.00203339	2.3872	22	1264	62	6532
Cluster_Peak17	Cluster_ubiquitin-dependent_protein_catabolic_process_GO	0.00240102	2.8188	28	1264	86	6532
Cluster_Peak17	Cluster_proteasome_comple_GO	0.00254722	2.99043	6	1264	9	6532
Cluster_Peak17	Cluster_cytoplasm_GO	0.00287103	3.37059	161	1264	687	6532
Cluster_Peak17	Cluster_hydrolase_activity_GO	0.00309115	3.62901	61	1264	227	6532
Cluster_Peak17	Cluster_mitochondrion_inheritance_GO	0.00317511	3.72758	7	1264	12	6532
Cluster_Peak17	Cluster_piecemeal_microautophagy_of_nucleus_GO	0.00317746	3.73033	13	1264	31	6532
Cluster_Peak17	Cluster_actin_cortical_patch_GO	0.0033184	3.8958	9	1264	18	6532
Cluster_Peak17	Cluster_actin_cytoskeleton_organization_GO	0.0033184	3.8958	9	1264	18	6532
Cluster_Peak17	Cluster_mitochondrial_matri_GO	0.00358934	4.21389	16	1264	42	6532
Cluster_Peak17	Cluster_regulation_of_translation_GO	0.00374458	4.39613	51	1264	185	6532
Cluster_Peak17	Cluster_protein_amino_acid_phosphorylation_GO	0.00398506	4.67846	22	1264	65	6532
Cluster_Peak17	Cluster_Glutathione_APGcategory	0.00399224	4.68689	5	1264	7	6532
Cluster_Peak17	Cluster_phosphotransferase_activity,_alcohol_group_as_acceptor"_GO	0.00399224	4.68689	5	1264	7	6532
Cluster_Peak17	Cluster_mitochondrial_inner_membrane_GO	0.00480179	5.6373	21	1264	62	6532
Cluster_Peak17	Cluster_vacuolar_membrane_GO	0.0053736	6.3086	18	1264	51	6532
Cluster_Peak17	Cluster_G1_phase_of_mitotic_cell_cycle_GO	0.00591677	6.94629	4	1264	5	6532
Cluster_Peak17	Cluster_peptide_binding_GO	0.00591677	6.94629	4	1264	5	6532
Cluster_Peak17	Cluster_protein_comple_assembly_GO	0.00601678	7.0637	11	1264	26	6532
Cluster_Peak17	Cluster_vesicle-mediated_transport_GO	0.00724364	8.50403	21	1264	64	6532
Cluster_Peak17	Cluster_response_to_copper_ion_GO	0.00768646	9.0239	3	1264	3	6532
Cluster_Peak17	Cluster_glycine_cleavage_comple_GO	0.00768646	9.0239	3	1264	3	6532
Cluster_Peak17	Cluster_Arp2/3_protein_comple_GO	0.00768646	9.0239	3	1264	3	6532
Cluster_Peak17	Cluster_response_to_inorganic_substance_GO	0.00768646	9.0239	3	1264	3	6532
Cluster_Peak17	Cluster_glycine_dehydrogenase_(decarboylating)_activity_GO	0.00768646	9.0239	3	1264	3	6532
Cluster_Peak17	Cluster_TORC1_comple_GO	0.00768646	9.0239	3	1264	3	6532
Cluster_Peak17	Cluster_removal_of_nonhomologous_ends_GO	0.00768646	9.0239	3	1264	3	6532
Cluster_Peak17	Cluster_coenzyme_binding_GO	0.00768646	9.0239	3	1264	3	6532
Cluster_Peak17	Cluster_hydrolase_activity,_acting_on_acid_anhydrides"_GO	0.00958241	11.2497	7	1264	14	6532
Cluster_Peak17	Cluster_pyrophosphatase_activity_GO	0.00958241	11.2497	7	1264	14	6532
Cluster_Peak17	Cluster_metalloendopeptidase_activity_GO	0.00981923	11.5278	6	1264	11	6532
Cluster_Peak19	Cluster_RNA_polymerase_II_transcription_factor_activity_GO	0.00774548	9.09319	2	35	25	6532
Cluster_Peak2	Cluster_Spellman_M-G1_peak	6.29073e-06	0.00738532	10	98	113	6532
Cluster_Peak2	Cluster_Spellman_G1_peak	0.000421454	0.494787	13	98	295	6532
Cluster_Peak2	Cluster_cell_division_GO	0.00208411	2.44674	6	98	89	6532
Cluster_Peak20	Cluster_endoplasmic_reticulum_GO	0.00429024	5.03674	4	28	158	6532
Cluster_Peak21	Cluster_phosphorus_metabolic_process_GO	3.73898e-07	0.000438956	4	33	13	6532
Cluster_Peak21	Cluster_TATAcontaining_APGcategory	6.85843e-07	0.000805179	18	33	1085	6532
Cluster_Peak21	Cluster_electron_carrier_activity_GO	0.000126336	0.148318	3	33	20	6532
Cluster_Peak21	Cluster_mitochondrial_electron_transport,_ubiquinol_to_cytochrome_c"_GO	0.000366627	0.430421	2	33	6	6532
Cluster_Peak21	Cluster_mitochondrial_respiratory_chain_comple_III_GO	0.000511656	0.600684	2	33	7	6532
Cluster_Peak21	Cluster_mitochondrial_respiratory_chain_GO	0.000511656	0.600684	2	33	7	6532
Cluster_Peak21	Cluster_oidation_reduction_GO	0.000651709	0.765107	4	33	80	6532
Cluster_Peak21	Cluster_metal_ion_binding_GO	0.00104051	1.22156	6	33	237	6532
Cluster_Peak21	Cluster_glycolysis_GO	0.0013232	1.55343	2	33	11	6532
Cluster_Peak21	Cluster_heme_binding_GO	0.0013232	1.55343	2	33	11	6532
Cluster_Peak21	Cluster_electron_transport_chain_GO	0.00321047	3.76909	2	33	17	6532
Cluster_Peak21	Cluster_oidoreductase_activity_GO	0.00619509	7.27303	3	33	75	6532
Cluster_Peak21	Cluster_mitochondrion_GO	0.00665767	7.8161	6	33	343	6532
Cluster_Peak21	Cluster_lipid_biosynthetic_process_GO	0.0069055	8.10706	2	33	25	6532
Cluster_Peak21	Cluster_Sterols_APGcategory	0.00802872	9.42572	2	33	27	6532
Cluster_Peak22	Cluster_mitochondrial_inner_membrane_GO	0.00181231	2.12765	3	26	62	6532
Cluster_Peak22	Cluster_electron_transport_chain_GO	0.00199741	2.34496	2	26	17	6532
Cluster_Peak22	Cluster_positive_regulation_of_transcription_from_RNA_polymerase_II_promoter_GO	0.00790424	9.27957	2	26	34	6532
Cluster_Peak24	Cluster_mRNAprocessing_APGcategory	2.50373e-05	0.0293937	6	33	120	6532
Cluster_Peak24	Cluster_specific_transcriptional_repressor_activity_GO	0.000511656	0.600684	2	33	7	6532
Cluster_Peak24	Cluster_vacuole_organization_GO	0.00087159	1.02325	2	33	9	6532
Cluster_Peak24	Cluster_binding_GO	0.00206809	2.42794	4	33	109	6532
Cluster_Peak24	Cluster_vacuolar_transport_GO	0.00360039	4.22686	2	33	18	6532
Cluster_Peak24	Cluster_actin_cytoskeleton_organization_GO	0.00360039	4.22686	2	33	18	6532
Cluster_Peak24	Cluster_Vacuole_APGcategory	0.00451712	5.3031	3	33	67	6532
Cluster_Peak24	Cluster_regulation_of_transcription,_DNA-dependent"_GO	0.00481844	5.65685	5	33	223	6532
Cluster_Peak24	Cluster_phosphoinositide_binding_GO	0.00489517	5.74693	2	33	21	6532
Cluster_Peak24	Cluster_GTPase_activator_activity_GO	0.00536774	6.30172	2	33	22	6532
Cluster_Peak24	Cluster_transcription_GO	0.00579966	6.8088	5	33	233	6532
Cluster_Peak24	Cluster_intracellular_GO	0.0068221	8.00914	4	33	152	6532
Cluster_Peak24	Cluster_protein_comple_assembly_GO	0.00745744	8.75504	2	33	26	6532
Cluster_Peak25	Cluster_GenesWithParalogs_E-100_APGcategory	0.00401215	4.71026	5	30	236	6532
Cluster_Peak25	Cluster_Purine_APGcategory	0.00485926	5.70477	2	30	23	6532
Cluster_Peak26	Cluster_iESR_APGcategory	6.24705e-06	0.00733403	12	60	278	6532
Cluster_Peak27	Cluster_Vacuole_APGcategory	2.49739e-05	0.0293194	5	35	67	6532
Cluster_Peak27	Cluster_protein_transport_GO	9.44235e-05	0.110853	7	35	208	6532
Cluster_Peak27	Cluster_vacuolar_transport_GO	0.000108854	0.127794	3	35	18	6532
Cluster_Peak27	Cluster_endosome_GO	0.000223101	0.261921	4	35	57	6532
Cluster_Peak27	Cluster_protein_targeting_to_vacuole_GO	0.000299027	0.351057	3	35	25	6532
Cluster_Peak27	Cluster_CORVET_comple_GO	0.000412812	0.484642	2	35	6	6532
Cluster_Peak27	Cluster_HOPS_comple_GO	0.000575992	0.676215	2	35	7	6532
Cluster_Peak27	Cluster_Golgi_transport_comple_GO	0.000765406	0.898587	2	35	8	6532
Cluster_Peak27	Cluster_transport_GO	0.0012536	1.47172	7	35	318	6532
Cluster_Peak27	Cluster_intra-Golgi_vesicle-mediated_transport_GO	0.00178004	2.08976	2	35	12	6532
Cluster_Peak27	Cluster_intracellular_protein_transport_GO	0.00219355	2.57523	3	35	49	6532
Cluster_Peak27	Cluster_nuclear_chromatin_GO	0.00450467	5.28849	2	35	19	6532
Cluster_Peak27	Cluster_phosphoinositide_binding_GO	0.00549505	6.45118	2	35	21	6532
Cluster_Peak27	Cluster_molecular_function_GO	0.00550549	6.46344	6	35	310	6532
Cluster_Peak27	Cluster_vacuole_fusion,_non-autophagic"_GO	0.00714976	8.39382	2	35	24	6532
Cluster_Peak27	Cluster_protein_binding_GO	0.00903767	10.6102	3	35	81	6532
Cluster_Peak29	Cluster_SGD-nonessentials_APGcategory	6.03388e-06	0.00708378	36	36	4683	6532
Cluster_Peak29	Cluster_Lysine_APGcategory	0.00103774	1.2183	2	36	9	6532
Cluster_Peak29	Cluster_Arginine_APGcategory	0.00296442	3.48023	2	36	15	6532
Cluster_Peak29	Cluster_TATAcontaining_APGcategory	0.00368208	4.32277	13	36	1085	6532
Cluster_Peak29	Cluster_GenesWithParalogs_E-100_APGcategory	0.00890534	10.4549	5	36	236	6532
Cluster_Peak3	Cluster_pyridoal_phosphate_binding_GO	0.000864305	1.01469	3	85	15	6532
Cluster_Peak3	Cluster_transferase_activity,_transferring_nitrogenous_groups"_GO	0.000987269	1.15905	2	85	4	6532
Cluster_Peak3	Cluster_catalytic_activity_GO	0.00277971	3.26338	7	85	146	6532
Cluster_Peak3	Cluster_endoplasmic_reticulum_GO	0.00431242	5.06278	7	85	158	6532
Cluster_Peak3	Cluster_anaphase-promoting_comple_GO	0.00445358	5.2285	2	85	8	6532
Cluster_Peak3	Cluster_integral_to_membrane_GO	0.00492881	5.78642	10	85	297	6532
Cluster_Peak3	Cluster_biosynthetic_process_GO	0.00567779	6.66572	2	85	9	6532
Cluster_Peak30	Cluster_proteolysis_GO	0.00278884	3.2741	3	25	75	6532
Cluster_Peak30	Cluster_cytosol_GO	0.00756287	8.87881	3	25	107	6532
Cluster_Peak31	Cluster_peroisomal_matri_GO	9.12932e-05	0.107178	3	79	8	6532
Cluster_Peak31	Cluster_fatty_acid_metabolic_process_GO	0.000192236	0.225685	3	79	10	6532
Cluster_Peak31	Cluster_ESR_APGcategory	0.00039062	0.458588	22	79	861	6532
Cluster_Peak31	Cluster_fatty_acid_beta-oidation_GO	0.00141066	1.65611	2	79	5	6532
Cluster_Peak31	Cluster_lipid_metabolic_process_GO	0.00222202	2.60866	3	79	22	6532
Cluster_Peak31	Cluster_methyltransferase_activity_GO	0.00287008	3.36947	3	79	24	6532
Cluster_Peak31	Cluster_PAC_APGcategory	0.00290672	3.41249	13	79	455	6532
Cluster_Peak31	Cluster_iESR_APGcategory	0.00606655	7.12212	9	79	278	6532
Cluster_Peak31	Cluster_peroisome_GO	0.00656238	7.70423	3	79	32	6532
Cluster_Peak31	Cluster_FattyAcid_APGcategory	0.00843786	9.90604	3	79	35	6532
Cluster_Peak32	Cluster_PAC_APGcategory	2.70978e-18	3.18128e-15	26	48	455	6532
Cluster_Peak32	Cluster_rESR_APGcategory	1.28054e-15	1.50336e-12	26	48	583	6532
Cluster_Peak32	Cluster_ESR_APGcategory	1.69396e-12	1.98871e-09	27	48	861	6532
Cluster_Peak32	Cluster_nucleolus_GO	1.29847e-07	0.00015244	7	48	56	6532
Cluster_Peak32	Cluster_SGDessentials_APGcategory	2.67711e-06	0.00314292	22	48	1104	6532
Cluster_Peak32	Cluster_preribosome,_large_subunit_precursor"_GO	3.68686e-06	0.00432838	3	48	5	6532
Cluster_Peak32	Cluster_methyltransferase_activity_GO	0.000676409	0.794105	3	48	24	6532
Cluster_Peak32	Cluster_rRNA_processing_GO	0.000762117	0.894726	4	48	57	6532
Cluster_Peak32	Cluster_ribosomal_large_subunit_biogenesis_GO	0.000778454	0.913905	2	48	6	6532
Cluster_Peak32	Cluster_RNA_binding_GO	0.00181903	2.13554	5	48	121	6532
Cluster_Peak32	Cluster_ribosome_biogenesis_GO	0.00211272	2.48033	6	48	184	6532
Cluster_Peak32	Cluster_rRNAprocessing_APGcategory	0.00224313	2.63343	3	48	36	6532
Cluster_Peak33	Cluster_chromosome_localization_GO	0.00915885	10.7525	1	20	3	6532
Cluster_Peak34	Cluster_TATAcontaining_APGcategory	0.00144807	1.70004	10	22	1085	6532
Cluster_Peak35	Cluster_ribosome_biogenesis_GO	9.91303e-06	0.0116379	8	39	184	6532
Cluster_Peak35	Cluster_rRNA_metabolic_process_GO	0.00176542	2.07261	4	39	88	6532
Cluster_Peak35	Cluster_chromatin_silencing_at_silent_mating-type_cassette_GO	0.00446447	5.24128	2	39	17	6532
Cluster_Peak35	Cluster_PAC_APGcategory	0.00469692	5.51419	8	39	455	6532
Cluster_Peak35	Cluster_translational_initiation_GO	0.00557132	6.54073	2	39	19	6532
Cluster_Peak35	Cluster_transcription_regulator_activity_GO	0.00744175	8.73662	2	39	22	6532
Cluster_Peak35	Cluster_histone_acetylation_GO	0.00744175	8.73662	2	39	22	6532
Cluster_Peak35	Cluster_translation_initiation_factor_activity_GO	0.00811993	9.5328	2	39	23	6532
Cluster_Peak35	Cluster_regulation_of_transcription,_DNA-dependent"_GO	0.00990772	11.6317	5	39	223	6532
Cluster_Peak4	Cluster_Mating_APGcategory	4.02644e-15	4.72704e-12	9	37	25	6532
Cluster_Peak4	Cluster_regulation_of_transcription,_mating-type_specific"_GO	4.33986e-09	5.095e-06	4	37	5	6532
Cluster_Peak4	Cluster_Spellman_M-G1_peak	3.52301e-05	0.0413601	6	37	113	6532
Cluster_Peak4	Cluster_Spellman_G2-M_peak	7.74571e-05	0.0909346	7	37	190	6532
Cluster_Peak4	Cluster_sequence-specific_DNA_binding_GO	0.000517669	0.607743	4	37	67	6532
Cluster_Peak4	Cluster_transcription_corepressor_activity_GO	0.00166291	1.95225	2	37	11	6532
Cluster_Peak4	Cluster_response_to_pheromone_GO	0.00234154	2.74896	2	37	13	6532
Cluster_Peak4	Cluster_regulation_of_transcription_from_RNA_polymerase_II_promoter_GO	0.00305519	3.5868	3	37	52	6532
Cluster_Peak4	Cluster_transcription_coactivator_activity_GO	0.00312967	3.67423	2	37	15	6532
Cluster_Peak5	Cluster_electron_transport_chain_GO	5.93336e-09	6.96576e-06	5	28	17	6532
Cluster_Peak5	Cluster_mitochondrial_respiratory_chain_comple_III_GO	9.37303e-09	1.10039e-05	4	28	7	6532
Cluster_Peak5	Cluster_mitochondrial_respiratory_chain_GO	9.37303e-09	1.10039e-05	4	28	7	6532
Cluster_Peak5	Cluster_ubiquinol-cytochrome-c_reductase_activity_GO	1.39907e-06	0.00164251	3	28	6	6532
Cluster_Peak5	Cluster_mitochondrial_electron_transport,_ubiquinol_to_cytochrome_c"_GO	1.39907e-06	0.00164251	3	28	6	6532
Cluster_Peak5	Cluster_mitochondrial_inner_membrane_GO	5.43449e-06	0.00638009	5	28	62	6532
Cluster_Peak5	Cluster_transport_GO	3.81613e-05	0.0448013	8	28	318	6532
Cluster_Peak5	Cluster_aerobic_respiration_GO	6.5299e-05	0.076661	3	28	19	6532
Cluster_Peak5	Cluster_electron_carrier_activity_GO	7.6602e-05	0.0899307	3	28	20	6532
Cluster_Peak5	Cluster_TATAcontaining_APGcategory	0.00021876	0.256824	13	28	1085	6532
Cluster_Peak5	Cluster_4_iron,_4_sulfur_cluster_binding"_GO	0.000263009	0.308773	2	28	6	6532
Cluster_Peak5	Cluster_metal_ion_binding_GO	0.000411998	0.483685	6	28	237	6532
Cluster_Peak5	Cluster_mitochondrion_GO	0.000469988	0.551766	7	28	343	6532
Cluster_Peak5	Cluster_iron_ion_binding_GO	0.000724192	0.850202	3	28	42	6532
Cluster_Peak5	Cluster_membrane_GO	0.000767859	0.901466	8	28	490	6532
Cluster_Peak5	Cluster_iron-sulfur_cluster_binding_GO	0.000780694	0.916535	2	28	10	6532
Cluster_Peak5	Cluster_heme_binding_GO	0.000951653	1.11724	2	28	11	6532
Cluster_Peak5	Cluster_metalloendopeptidase_activity_GO	0.000951653	1.11724	2	28	11	6532
Cluster_Peak5	Cluster_cell_death_GO	0.00134248	1.57607	2	28	13	6532
Cluster_Peak5	Cluster_response_to_toin_GO	0.00231604	2.71903	2	28	17	6532
Cluster_Peak5	Cluster_transporter_activity_GO	0.0028967	3.40072	2	28	19	6532
Cluster_Peak5	Cluster_catalytic_activity_GO	0.00323018	3.79223	4	28	146	6532
Cluster_Peak5	Cluster_proteolysis_GO	0.00387553	4.54987	3	28	75	6532
Cluster_Peak5	Cluster_oidoreductase_activity_GO	0.00387553	4.54987	3	28	75	6532
Cluster_Peak5	Cluster_oidation_reduction_GO	0.00464855	5.4574	3	28	80	6532
Cluster_Peak5	Cluster_transmembrane_transport_GO	0.00500187	5.87219	2	28	25	6532
Cluster_Peak6	Cluster_GenesWithParalogs_E-100_APGcategory	1.73957e-18	2.04226e-15	18	32	236	6532
Cluster_Peak6	Cluster_telomere_maintenance_via_recombination_GO	1.12444e-13	1.32009e-10	7	32	14	6532
Cluster_Peak6	Cluster_DNA_helicase_activity_GO	3.72302e-13	4.37083e-10	7	32	16	6532
Cluster_Peak6	Cluster_ATP-dependent_helicase_activity_GO	5.43935e-12	6.3858e-09	7	32	22	6532
Cluster_Peak6	Cluster_helicase_activity_GO	6.72635e-10	7.89674e-07	7	32	41	6532
Cluster_Peak6	Cluster_Spellman_M-G1_peak	2.02433e-09	2.37657e-06	9	32	113	6532
Cluster_Peak6	Cluster_nucleic_acid_binding_GO	4.49689e-07	0.000527935	7	32	102	6532
Cluster_Peak6	Cluster_Spellman_G1_peak	8.07295e-07	0.000947765	10	32	295	6532
Cluster_Peak6	Cluster_ScParalogs_E-10_APGcategory	2.08113e-06	0.00244324	20	32	1511	6532
Cluster_Peak6	Cluster_hydrolase_activity_GO	8.93539e-05	0.104901	7	32	227	6532
Cluster_Peak6	Cluster_ATP_binding_GO	9.97677e-05	0.117127	7	32	231	6532
Cluster_Peak6	Cluster_nucleotide_binding_GO	0.000443647	0.520841	7	32	294	6532
Cluster_Peak7	Cluster_fatty_acid_beta-oidation_GO	1.80488e-05	0.0211892	3	81	5	6532
Cluster_Peak7	Cluster_TATAcontaining_APGcategory	2.08839e-05	0.0245177	29	81	1085	6532
Cluster_Peak7	Cluster_fungal-type_cell_wall_GO	2.43457e-05	0.0285819	5	81	29	6532
Cluster_Peak7	Cluster_peroisome_GO	4.00982e-05	0.0470753	5	81	32	6532
Cluster_Peak7	Cluster_FattyAcid_APGcategory	6.27857e-05	0.0737105	5	81	35	6532
Cluster_Peak7	Cluster_peroisomal_matri_GO	9.83843e-05	0.115503	3	81	8	6532
Cluster_Peak7	Cluster_cell_wall_GO	0.000111874	0.131341	4	81	21	6532
Cluster_Peak7	Cluster_SGD-nonessentials_APGcategory	0.000157999	0.185491	72	81	4683	6532
Cluster_Peak7	Cluster_cell_wall_organization_GO	0.000178927	0.21006	6	81	68	6532
Cluster_Peak7	Cluster_Pyrimidine_APGcategory	0.000193084	0.22668	4	81	24	6532
Cluster_Peak7	Cluster_fatty_acid_metabolic_process_GO	0.000207072	0.243103	3	81	10	6532
Cluster_Peak7	Cluster_etracellular_region_GO	0.000310008	0.36395	4	81	27	6532
Cluster_Peak7	Cluster_anchored_to_membrane_GO	0.000372885	0.437767	3	81	12	6532
Cluster_Peak7	Cluster_ScParalogs_E-10_APGcategory	0.000672346	0.789335	32	81	1511	6532
Cluster_Peak7	Cluster_NADH_oidation_GO	0.00220593	2.58976	2	81	6	6532
Cluster_Peak7	Cluster_lipid_metabolic_process_GO	0.00238696	2.80229	3	81	22	6532
Cluster_Peak7	Cluster_metabolic_process_GO	0.00242647	2.84867	6	81	111	6532
Cluster_Peak7	Cluster_Spellman_M-G1_peak	0.00265506	3.11704	6	81	113	6532
Cluster_Peak7	Cluster_Glycerol_APGcategory	0.00306348	3.59653	2	81	7	6532
Cluster_Peak7	Cluster_mitochondrial_intermembrane_space_GO	0.00776917	9.12101	2	81	11	6532
Cluster_Peak7	Cluster_FAD_binding_GO	0.00924843	10.8577	2	81	12	6532
Cluster_Peak8	Cluster_iESR_APGcategory	1.42013e-13	1.66724e-10	43	286	278	6532
Cluster_Peak8	Cluster_SGD-nonessentials_APGcategory	2.40029e-11	2.81795e-08	251	286	4683	6532
Cluster_Peak8	Cluster_ESR_APGcategory	6.50647e-11	7.63859e-08	78	286	861	6532
Cluster_Peak8	Cluster_TATAcontaining_APGcategory	2.68829e-07	0.000315606	81	286	1085	6532
Cluster_Peak8	Cluster_ScParalogs_E-10_APGcategory	3.29528e-07	0.000386866	103	286	1511	6532
Cluster_Peak8	Cluster_Flocculation_APGcategory	1.73882e-05	0.0204138	4	286	5	6532
Cluster_Peak8	Cluster_Lysine_APGcategory	0.000380841	0.447107	4	286	9	6532
Cluster_Peak8	Cluster_anchored_to_membrane_GO	0.00134756	1.58203	4	286	12	6532
Cluster_Peak8	Cluster_fungal-type_cell_wall_GO	0.0013533	1.58878	6	286	29	6532
Cluster_Peak8	Cluster_heme_biosynthetic_process_GO	0.00150541	1.76735	3	286	6	6532
Cluster_Peak8	Cluster_Spellman_G2-M_peak	0.00157618	1.85044	18	286	190	6532
Cluster_Peak8	Cluster_plasma_membrane_GO	0.00169767	1.99307	12	286	103	6532
Cluster_Peak8	Cluster_peptidyl-amino_acid_modification_GO	0.00206666	2.42625	7	286	42	6532
Cluster_Peak8	Cluster_Isoleucine_APGcategory	0.00254937	2.99296	3	286	7	6532
Cluster_Peak8	Cluster_amino_acid_biosynthetic_process_GO	0.00272759	3.20219	5	286	23	6532
Cluster_Peak8	Cluster_Heme_APGcategory	0.00394753	4.6344	3	286	8	6532
Cluster_Peak8	Cluster_transmembrane_transport_GO	0.00400882	4.70635	5	286	25	6532
Cluster_Peak8	Cluster_oidoreductase_activity_GO	0.00516568	6.06451	9	286	75	6532
Cluster_Peak8	Cluster_flocculation_via_cell_wall_protein-carbohydrate_interaction_GO	0.00556676	6.53537	2	286	3	6532
Cluster_Peak8	Cluster_biofilm_formation_GO	0.00556676	6.53537	2	286	3	6532
Cluster_Peak8	Cluster_lysine_biosynthetic_process_GO	0.00556676	6.53537	2	286	3	6532
Cluster_Peak8	Cluster_etracellular_region_GO	0.0056709	6.65764	5	286	27	6532
Cluster_Peak8	Cluster_specific_RNA_polymerase_II_transcription_factor_activity_GO	0.00828164	9.72265	4	286	19	6532
Cluster_Peak9	Cluster_SGD-nonessentials_APGcategory	0.00039411	0.462686	106	125	4683	6532
Cluster_Peak9	Cluster_integral_to_membrane_GO	0.000503308	0.590883	15	125	297	6532
Cluster_Peak9	Cluster_vacuolar_proton-transporting_V-type_ATPase,_V0_domain"_GO	0.00107635	1.26363	2	125	3	6532
Cluster_Peak9	Cluster_proton-transporting_two-sector_ATPase_comple,_proton-transporting_domain"_GO	0.00107635	1.26363	2	125	3	6532
Cluster_Peak9	Cluster_proton-transporting_V-type_ATPase,_V0_domain"_GO	0.00107635	1.26363	2	125	3	6532
Cluster_Peak9	Cluster_transmembrane_transport_GO	0.00118402	1.39004	4	125	25	6532
Cluster_Peak9	Cluster_phosphatidylinositol_3-phosphate_binding_GO	0.0013266	1.55743	3	125	12	6532
Cluster_Peak9	Cluster_protein_amino_acid_N-linked_glycosylation_GO	0.0017006	1.9965	3	125	13	6532
Cluster_Peak9	Cluster_ubiquitin_thiolesterase_activity_GO	0.00212564	2.4955	2	125	4	6532
Cluster_Peak9	Cluster_vacuolar_acidification_GO	0.00213432	2.50569	3	125	14	6532
Cluster_Peak9	Cluster_ion_transport_GO	0.00238261	2.79718	4	125	30	6532
Cluster_Peak9	Cluster_ubiquitin-specific_protease_activity_GO	0.00349837	4.10709	2	125	5	6532
Cluster_Peak9	Cluster_calcium_ion_binding_GO	0.00452472	5.31202	3	125	18	6532
Cluster_Peak9	Cluster_membrane_GO	0.00529563	6.21707	18	125	490	6532
Cluster_Peak9	Cluster_vacuole_GO	0.00558199	6.55325	5	125	60	6532
Cluster_Peak9	Cluster_protein_deubiquitination_GO	0.00716417	8.41074	2	125	7	6532
Cluster_Peak9	Cluster_maintenance_of_protein_location_GO	0.00716417	8.41074	2	125	7	6532
Cluster_Peak9	Cluster_Vacuole_APGcategory	0.00887989	10.425	5	125	67	6532

## Sheet: Hotspot_RegEnch
Query Cluster	Comparison Cluster	pvalue	Bonferroni pval (795 tests)	Overlap	Cluster 1 size	Cluster2 size	Total Genes Assessed
Cluster_Peak1	Cluster_YeasTractDirect_MGA2	3.36e-08	2.67e-05	6	53	25	6532
Cluster_Peak1	Cluster_YeasTractDirect_PIP2	1.56e-06	0.00123983	6	53	46	6532
Cluster_Peak1	Cluster_YeasTractDirect_SPT23	2.91e-06	0.00231113	6	53	51	6532
Cluster_Peak1	Cluster_YeasTractDirect_OAF1	2.04e-05	0.0162384	6	53	71	6532
Cluster_Peak1	Cluster_Harbison_INO2_YPD	0.000149624	0.118951	4	53	34	6532
Cluster_Peak1	Cluster_Harbison_OPI1_YPD	0.000192801	0.153277	2	53	3	6532
Cluster_Peak1	Cluster_Harbison_INO4_YPD	0.00158802	1.26248	3	53	29	6532
Cluster_Peak1	Cluster_MacIsaac_CIN5	0.00278084	2.21077	4	53	73	6532
Cluster_Peak1	Cluster_TsvetanovaRBP_GUS1	0.00339044	2.6954	2	53	11	6532
Cluster_Peak1	Cluster_YeasTractDirect_HAP1	0.00649406	5.16278	5	53	147	6532
Cluster_Peak1	Cluster_YeasTractDirect_GTS1	0.00798349	6.34687	3	53	51	6532
Cluster_Peak1	Cluster_Harbison_USV1_YPD	0.00814654	6.4765	1	53	1	6532
Cluster_Peak1	Cluster_Harbison_HAP1_YPD	0.00853113	6.78225	4	53	100	6532
Cluster_Peak1	Cluster_Harbison_MSS11_BUT14	0.00909533	7.23079	2	53	18	6532
Cluster_Peak10	Cluster_YeasTractDirect_MET4	1.08e-22	8.6e-20	18	74	55	6532
Cluster_Peak10	Cluster_YeasTractDirect_MET32	4.75e-21	3.78e-18	19	74	79	6532
Cluster_Peak10	Cluster_MacIsaac_MET32	1.04e-20	8.28e-18	12	74	17	6532
Cluster_Peak10	Cluster_Harbison_MET32_SM	9.88e-19	7.85e-16	13	74	29	6532
Cluster_Peak10	Cluster_YeasTractDirect_MET28	2.41e-18	1.91e-15	15	74	50	6532
Cluster_Peak10	Cluster_YeasTractDirect_MET31	9.8e-15	7.79e-12	15	74	83	6532
Cluster_Peak10	Cluster_YeasTractDirect_CBF1	3.03e-12	2.41e-09	22	74	322	6532
Cluster_Peak10	Cluster_MacIsaac_MET4	1.19e-11	9.49e-09	6	74	7	6532
Cluster_Peak10	Cluster_Harbison_MET32_YPD	1.37e-10	1.09e-07	9	74	36	6532
Cluster_Peak10	Cluster_MacIsaac_MET31	8.11e-10	6.45e-07	7	74	19	6532
Cluster_Peak10	Cluster_Harbison_CBF1_SM	3.14e-08	2.5e-05	13	74	166	6532
Cluster_Peak10	Cluster_MacIsaac_CBF1	1.7e-07	0.000135232	12	74	159	6532
Cluster_Peak10	Cluster_Harbison_MET4_YPD	1.03e-06	0.000816326	4	74	8	6532
Cluster_Peak10	Cluster_Harbison_MET31_YPD	2.49e-05	0.0198133	4	74	16	6532
Cluster_Peak10	Cluster_YeasTractDirect_STE12	4.29e-05	0.0341289	38	74	1900	6532
Cluster_Peak10	Cluster_YeasTractDirect_LEU3	4.98e-05	0.0396054	11	74	231	6532
Cluster_Peak10	Cluster_YeasTractDirect_INO4	5.39e-05	0.0428795	18	74	577	6532
Cluster_Peak10	Cluster_Harbison_MET4_SM	0.000114185	0.0907773	4	74	23	6532
Cluster_Peak10	Cluster_Venters25-37C_Nhp6a	0.000203141	0.161497	34	74	1720	6532
Cluster_Peak10	Cluster_MacIsaac_BAS1	0.000378861	0.301195	4	74	31	6532
Cluster_Peak10	Cluster_Venters25-37C_Bur6	0.000394809	0.313873	44	74	2584	6532
Cluster_Peak10	Cluster_YeasTractDirect_SOK2	0.000696625	0.553817	19	74	769	6532
Cluster_Peak10	Cluster_Venters25-37C_Ada2	0.000970364	0.771439	15	74	545	6532
Cluster_Peak10	Cluster_YeasTractDirect_BAS1	0.00126084	1.00236	6	74	107	6532
Cluster_Peak10	Cluster_Venters25-37C_Ncb2	0.00137994	1.09706	31	74	1662	6532
Cluster_Peak10	Cluster_Venters25-37C_Sin3	0.00161818	1.28645	9	74	244	6532
Cluster_Peak10	Cluster_Venters25-37C_Top1	0.00349735	2.7804	15	74	620	6532
Cluster_Peak10	Cluster_Harbison_CBF1_YPD	0.00432969	3.44211	2	74	9	6532
Cluster_Peak10	Cluster_Harbison_STP1_YPD	0.00432969	3.44211	2	74	9	6532
Cluster_Peak10	Cluster_Venters25-37C_Rap1	0.00510866	4.06138	16	74	710	6532
Cluster_Peak10	Cluster_Harbison_DAL81_RAPA	0.00546026	4.34091	4	74	63	6532
Cluster_Peak10	Cluster_Venters25-37C_Rpd3	0.00571419	4.54278	32	74	1888	6532
Cluster_Peak10	Cluster_YeasTractDirect_RAP1	0.00629567	5.00506	24	74	1286	6532
Cluster_Peak10	Cluster_Venters25-37C_Not5	0.00629867	5.00744	7	74	195	6532
Cluster_Peak10	Cluster_Venters25-37C_Rna14	0.00636717	5.0619	13	74	534	6532
Cluster_Peak10	Cluster_Harbison_BAS1_SM	0.00651851	5.18222	2	74	11	6532
Cluster_Peak10	Cluster_YeasTractDirect_PHD1	0.00740943	5.8905	12	74	482	6532
Cluster_Peak10	Cluster_MacIsaac_TYE7	0.00822861	6.54174	3	74	37	6532
Cluster_Peak10	Cluster_Venters25-37C_Spt7	0.0085244	6.7769	19	74	955	6532
Cluster_Peak10	Cluster_Venters25-37C_Pcf11	0.0086492	6.87612	20	74	1027	6532
Cluster_Peak10	Cluster_MacIsaac_GCN4	0.00985652	7.83593	5	74	116	6532
Cluster_Peak11	Cluster_Venters25-37C_Zap1	0.000108661	0.0863857	40	126	1172	6532
Cluster_Peak11	Cluster_Venters25-37C_Aor1	0.000320547	0.254835	37	126	1104	6532
Cluster_Peak11	Cluster_Venters25-37C_Thp1	0.00126693	1.00721	39	126	1271	6532
Cluster_Peak11	Cluster_Venters25-37C_Rei1	0.00255968	2.03494	32	126	1014	6532
Cluster_Peak11	Cluster_Venters25-37C_Snf5	0.00426172	3.38807	31	126	1004	6532
Cluster_Peak11	Cluster_Harbison_NDD1_YPD	0.0057723	4.58898	5	126	60	6532
Cluster_Peak12	Cluster_MacIsaac_FKH1	0.00354741	2.82019	6	152	64	6532
Cluster_Peak12	Cluster_Venters25-37C_Bye1	0.00750093	5.96324	27	152	717	6532
Cluster_Peak12	Cluster_Harbison_GAT1_SM	0.00842194	6.69544	4	152	35	6532
Cluster_Peak13	Cluster_YeasTractDirect_HAP1	4.44e-54	3.53e-51	74	376	147	6532
Cluster_Peak13	Cluster_Harbison_HAP1_YPD	1.86e-41	1.48e-38	54	376	100	6532
Cluster_Peak13	Cluster_MacIsaac_HAP1	6.17e-37	4.91e-34	42	376	65	6532
Cluster_Peak13	Cluster_Harbison_HAP4_YPD	1.14e-12	9.06e-10	18	376	40	6532
Cluster_Peak13	Cluster_YeasTractDirect_STE12	1.29e-08	1.03e-05	159	376	1900	6532
Cluster_Peak13	Cluster_YeasTractDirect_HAP5	1.61e-08	1.28e-05	30	376	167	6532
Cluster_Peak13	Cluster_YeasTractDirect_HAP4	1.79e-08	1.42e-05	32	376	187	6532
Cluster_Peak13	Cluster_YeasTractDirect_HAP2	3.53e-08	2.81e-05	29	376	163	6532
Cluster_Peak13	Cluster_YeasTractDirect_INO2	7.54e-08	5.99e-05	18	376	72	6532
Cluster_Peak13	Cluster_MacIsaac_HAP4	1.31e-07	0.000104202	12	376	33	6532
Cluster_Peak13	Cluster_YeasTractDirect_HAP3	1.92e-07	0.000152469	27	376	156	6532
Cluster_Peak13	Cluster_YeasTractDirect_SOK2	1.99e-07	0.000158449	78	376	769	6532
Cluster_Peak13	Cluster_YeasTractDirect_YAP1	5.03e-07	0.000400277	51	376	434	6532
Cluster_Peak13	Cluster_Harbison_INO2_YPD	1.71e-06	0.00135951	11	376	34	6532
Cluster_Peak13	Cluster_MacIsaac_INO4	3.81e-06	0.00302757	9	376	24	6532
Cluster_Peak13	Cluster_Venters25-37C_Swi3	6.03e-06	0.00479186	147	376	1880	6532
Cluster_Peak13	Cluster_Venters25-37C_Ncb2	6.73e-06	0.00534647	133	376	1662	6532
Cluster_Peak13	Cluster_Venters25-37C_Sua7	9.22e-06	0.00732943	239	376	3449	6532
Cluster_Peak13	Cluster_Venters25-37C_Itc1	1.03e-05	0.00815064	167	376	2221	6532
Cluster_Peak13	Cluster_Venters25-37C_Rsc1	1.31e-05	0.0104436	107	376	1281	6532
Cluster_Peak13	Cluster_Harbison_INO4_YPD	2.25e-05	0.0179197	9	376	29	6532
Cluster_Peak13	Cluster_Venters25-37C_Dig1	2.82e-05	0.0224013	43	376	394	6532
Cluster_Peak13	Cluster_Venters25-37C_Spt3	2.85e-05	0.0226533	150	376	1979	6532
Cluster_Peak13	Cluster_Harbison_HAP5_SM	3.06e-05	0.0243149	9	376	30	6532
Cluster_Peak13	Cluster_MacIsaac_INO2	3.64e-05	0.0289363	8	376	24	6532
Cluster_Peak13	Cluster_Venters25-37C_Nhp6a	4.22e-05	0.0335435	133	376	1720	6532
Cluster_Peak13	Cluster_YeasTractDirect_PHD1	4.99e-05	0.0396963	49	376	482	6532
Cluster_Peak13	Cluster_MacIsaac_AFT1	5e-05	0.0397555	10	376	39	6532
Cluster_Peak13	Cluster_Venters25-37C_Rpd3	5.36e-05	0.0426016	143	376	1888	6532
Cluster_Peak13	Cluster_Venters25-37C_Isw1	6.76e-05	0.0537156	148	376	1977	6532
Cluster_Peak13	Cluster_YeasTractDirect_FLO8	7.94e-05	0.0631153	27	376	213	6532
Cluster_Peak13	Cluster_MacIsaac_HAP5	7.98e-05	0.0634634	7	376	20	6532
Cluster_Peak13	Cluster_Harbison_YAP1_YPD	0.000141138	0.112205	11	376	52	6532
Cluster_Peak13	Cluster_YeasTractDirect_ROX1	0.000155887	0.12393	23	376	175	6532
Cluster_Peak13	Cluster_Venters25-37C_Ino80	0.000191294	0.152079	186	376	2648	6532
Cluster_Peak13	Cluster_Venters25-37C_Rsc9	0.000201976	0.160571	216	376	3166	6532
Cluster_Peak13	Cluster_Venters25-37C_Srb4	0.000208653	0.165879	50	376	524	6532
Cluster_Peak13	Cluster_Venters25-37C_Bur6	0.000208813	0.166007	182	376	2584	6532
Cluster_Peak13	Cluster_Venters25-37C_Spt23	0.000224923	0.178814	115	376	1493	6532
Cluster_Peak13	Cluster_Venters25-37C_Cyc8	0.000229553	0.182494	148	376	2023	6532
Cluster_Peak13	Cluster_Venters25-37C_Tfa2	0.000264574	0.210336	114	376	1483	6532
Cluster_Peak13	Cluster_Venters25-37C_Ume6	0.000267423	0.212602	109	376	1405	6532
Cluster_Peak13	Cluster_YeasTractDirect_SKN7	0.000275236	0.218813	50	376	530	6532
Cluster_Peak13	Cluster_MacIsaac_CBF1	0.000280196	0.222756	21	376	159	6532
Cluster_Peak13	Cluster_Venters25-37C_Pcf11	0.000320151	0.25452	84	376	1027	6532
Cluster_Peak13	Cluster_YeasTractDirect_GSM1	0.000358839	0.285277	6	376	18	6532
Cluster_Peak13	Cluster_Venters25-37C_Rxt1	0.000366346	0.291245	80	376	971	6532
Cluster_Peak13	Cluster_YeasTractDirect_MGA2	0.0003852	0.306234	7	376	25	6532
Cluster_Peak13	Cluster_Venters25-37C_TBP	0.00041922	0.33328	158	376	2212	6532
Cluster_Peak13	Cluster_Venters25-37C_Tfc6	0.00042397	0.337056	96	376	1219	6532
Cluster_Peak13	Cluster_Harbison_HAP2_RAPA	0.000434888	0.345736	8	376	33	6532
Cluster_Peak13	Cluster_YeasTractDirect_YAP7	0.00051928	0.412828	22	376	178	6532
Cluster_Peak13	Cluster_Venters25-37C_Msn2	0.00052047	0.413774	91	376	1149	6532
Cluster_Peak13	Cluster_YeasTractDirect_NRG1	0.000537596	0.427388	27	376	239	6532
Cluster_Peak13	Cluster_Venters25-37C_Sir2	0.000588535	0.467886	83	376	1031	6532
Cluster_Peak13	Cluster_Venters25-37C_Ioc4	0.000603181	0.479529	47	376	506	6532
Cluster_Peak13	Cluster_MacIsaac_YAP7	0.000706738	0.561857	11	376	62	6532
Cluster_Peak13	Cluster_Harbison_YAP7_H2O2Lo	0.000740974	0.589075	15	376	103	6532
Cluster_Peak13	Cluster_Venters25-37C_Sfp1	0.000829127	0.659156	102	376	1336	6532
Cluster_Peak13	Cluster_YeasTractDirect_TEC1	0.00092091	0.732123	44	376	474	6532
Cluster_Peak13	Cluster_Venters25-37C_Taf10	0.00103477	0.822646	97	376	1266	6532
Cluster_Peak13	Cluster_Venters25-37C_Rxt2	0.00113979	0.906132	141	376	1975	6532
Cluster_Peak13	Cluster_Harbison_MSN2_H2O2Hi	0.00116494	0.926131	10	376	56	6532
Cluster_Peak13	Cluster_YeasTractDirect_IXR1	0.00122176	0.971299	15	376	108	6532
Cluster_Peak13	Cluster_Venters25-37C_Fkh2	0.00136817	1.0877	58	376	684	6532
Cluster_Peak13	Cluster_Venters25-37C_Hfi1	0.00156495	1.24414	93	376	1219	6532
Cluster_Peak13	Cluster_Venters25-37C_Fcp1	0.00157248	1.25012	58	376	688	6532
Cluster_Peak13	Cluster_YeasTractDirect_CBF1	0.00157587	1.25281	32	376	322	6532
Cluster_Peak13	Cluster_Harbison_NRG1_H2O2Hi	0.00160192	1.27352	13	376	89	6532
Cluster_Peak13	Cluster_Venters25-37C_Rtt103	0.0016214	1.28901	106	376	1425	6532
Cluster_Peak13	Cluster_Venters25-37C_Ycs4	0.00165642	1.31686	105	376	1410	6532
Cluster_Peak13	Cluster_YeasTractDirect_MSN2	0.0017198	1.36724	29	376	284	6532
Cluster_Peak13	Cluster_Venters25-37C_Top1	0.00187347	1.48941	53	376	620	6532
Cluster_Peak13	Cluster_Venters25-37C_Rna14	0.00190548	1.51485	47	376	534	6532
Cluster_Peak13	Cluster_MacIsaac_HAP2	0.00193817	1.54085	6	376	24	6532
Cluster_Peak13	Cluster_Venters25-37C_Hht2	0.00202431	1.60933	32	376	327	6532
Cluster_Peak13	Cluster_YeasTractDirect_SPT23	0.00222063	1.7654	9	376	51	6532
Cluster_Peak13	Cluster_Venters25-37C_Ctk1	0.00236912	1.88345	102	376	1377	6532
Cluster_Peak13	Cluster_Venters25-37C_TAF1	0.00236952	1.88377	174	376	2560	6532
Cluster_Peak13	Cluster_MacIsaac_SKN7	0.00238046	1.89246	14	376	104	6532
Cluster_Peak13	Cluster_YeasTractDirect_CIN5	0.00242271	1.92605	46	376	526	6532
Cluster_Peak13	Cluster_MacIsaac_SUT1	0.00255233	2.0291	9	376	52	6532
Cluster_Peak13	Cluster_Venters25-37C_Fkh1	0.00266392	2.11782	141	376	2014	6532
Cluster_Peak13	Cluster_MacIsaac_YAP1	0.00282458	2.24554	5	376	18	6532
Cluster_Peak13	Cluster_ScherrerRBP_MAP1	0.00286129	2.27472	18	376	153	6532
Cluster_Peak13	Cluster_YeasTractDirect_SWI4	0.00298749	2.37505	39	376	432	6532
Cluster_Peak13	Cluster_Venters25-37C_Pho2	0.00303154	2.41008	78	376	1011	6532
Cluster_Peak13	Cluster_YeasTractDirect_PDR3	0.00306151	2.4339	16	376	130	6532
Cluster_Peak13	Cluster_MacIsaac_YAP6	0.00318669	2.53342	8	376	44	6532
Cluster_Peak13	Cluster_Harbison_CIN5_YPD	0.00324221	2.57756	15	376	119	6532
Cluster_Peak13	Cluster_Venters25-37C_Yap1	0.00373766	2.97144	32	376	340	6532
Cluster_Peak13	Cluster_YeasTractDirect_MET4	0.00378805	3.0115	9	376	55	6532
Cluster_Peak13	Cluster_Harbison_SUT1_YPD	0.00378805	3.0115	9	376	55	6532
Cluster_Peak13	Cluster_Venters25-37C_Thp1	0.00389829	3.09914	94	376	1271	6532
Cluster_Peak13	Cluster_YeasTractDirect_MSN4	0.00395825	3.14681	25	376	247	6532
Cluster_Peak13	Cluster_Venters25-37C_Cha4	0.00398984	3.17192	54	376	657	6532
Cluster_Peak13	Cluster_Venters25-37C_Jhd2	0.00426039	3.38701	45	376	527	6532
Cluster_Peak13	Cluster_Venters25-37C_Snf2	0.00449913	3.57681	33	376	358	6532
Cluster_Peak13	Cluster_Venters25-37C_Cdc36	0.00473705	3.76596	86	376	1153	6532
Cluster_Peak13	Cluster_YeasTractDirect_PUT3	0.00480923	3.82333	15	376	124	6532
Cluster_Peak13	Cluster_YeasTractDirect_HMS1	0.00486377	3.8667	8	376	47	6532
Cluster_Peak13	Cluster_Venters25-37C_Rvb2	0.0050757	4.03519	70	376	907	6532
Cluster_Peak13	Cluster_Venters25-37C_Ctr9	0.00600624	4.77496	91	376	1242	6532
Cluster_Peak13	Cluster_YeasTractDirect_RGT1	0.00611353	4.86026	9	376	59	6532
Cluster_Peak13	Cluster_Venters25-37C_Ure2	0.00664422	5.28216	64	376	825	6532
Cluster_Peak13	Cluster_MacIsaac_CAD1	0.00681709	5.41959	4	376	14	6532
Cluster_Peak13	Cluster_MacIsaac_NRG1	0.00701213	5.57464	10	376	71	6532
Cluster_Peak13	Cluster_MacIsaac_NDD1	0.00714606	5.68112	8	376	50	6532
Cluster_Peak13	Cluster_Venters25-37C_Asf1	0.00732017	5.81953	62	376	798	6532
Cluster_Peak13	Cluster_YeasTractDirect_PDR1	0.00773103	6.14617	31	376	343	6532
Cluster_Peak13	Cluster_Venters25-37C_Pob3	0.00788516	6.2687	93	376	1286	6532
Cluster_Peak13	Cluster_YeasTractDirect_INO4	0.00847575	6.73822	47	376	577	6532
Cluster_Peak13	Cluster_MacIsaac_OPI1	0.0095398	7.58414	2	376	3	6532
Cluster_Peak13	Cluster_Harbison_OPI1_YPD	0.0095398	7.58414	2	376	3	6532
Cluster_Peak13	Cluster_Venters25-37C_Taf3	0.00955248	7.59422	96	376	1343	6532
Cluster_Peak13	Cluster_Venters25-37C_Tup1	0.009602	7.63359	34	376	391	6532
Cluster_Peak13	Cluster_Venters25-37C_Ssl2	0.00979287	7.78534	162	376	2434	6532
Cluster_Peak13	Cluster_Venters25-37C_Taf13	0.00990395	7.87364	133	376	1949	6532
Cluster_Peak14	Cluster_ScherrerRBP_STI1	3.78e-16	3.01e-13	14	47	86	6532
Cluster_Peak14	Cluster_YeasTractDirect_GAT3	1.64e-13	1.31e-10	14	47	131	6532
Cluster_Peak14	Cluster_YeasTractDirect_SWI5	2.53e-12	2.01e-09	15	47	195	6532
Cluster_Peak14	Cluster_YeasTractDirect_RGM1	2.11e-11	1.68e-08	10	47	66	6532
Cluster_Peak14	Cluster_YeasTractDirect_GAL4	2.33e-11	1.85e-08	12	47	119	6532
Cluster_Peak14	Cluster_YeasTractDirect_GZF3	1.6e-10	1.28e-07	9	47	57	6532
Cluster_Peak14	Cluster_YeasTractDirect_HAP4	3.43e-10	2.73e-07	13	47	187	6532
Cluster_Peak14	Cluster_YeasTractDirect_SMP1	7.47e-09	5.94e-06	12	47	195	6532
Cluster_Peak14	Cluster_YeasTractDirect_YAP5	3.93e-08	3.13e-05	16	47	449	6532
Cluster_Peak14	Cluster_YeasTractDirect_PDR1	6.54e-08	5.2e-05	14	47	343	6532
Cluster_Peak14	Cluster_YeasTractDirect_UGA3	4.37e-07	0.000347628	8	47	100	6532
Cluster_Peak14	Cluster_YeasTractDirect_MBP1	2.54e-06	0.0020224	12	47	332	6532
Cluster_Peak14	Cluster_YeasTractDirect_SWI4	6.83e-06	0.00543138	13	47	432	6532
Cluster_Peak14	Cluster_YeasTractDirect_MSN4	7.5e-06	0.00596611	10	47	247	6532
Cluster_Peak14	Cluster_ScherrerRBP_MAP1	1.09e-05	0.00868953	8	47	153	6532
Cluster_Peak14	Cluster_YeasTractDirect_DAL80	4.5e-05	0.035795	5	47	56	6532
Cluster_Peak14	Cluster_Venters25-37C_Yaf9	4.71e-05	0.0374678	10	47	305	6532
Cluster_Peak14	Cluster_YeasTractDirect_HAP1	7.5e-05	0.0595975	7	47	147	6532
Cluster_Peak14	Cluster_YeasTractDirect_ZAP1	0.000132334	0.105206	5	47	70	6532
Cluster_Peak14	Cluster_Harbison_YAP5_YPD	0.000145207	0.11544	4	47	38	6532
Cluster_Peak14	Cluster_YeasTractDirect_HCM1	0.00017762	0.141208	8	47	226	6532
Cluster_Peak14	Cluster_YeasTractDirect_TOS8	0.000183117	0.145578	8	47	227	6532
Cluster_Peak14	Cluster_YeasTractDirect_SOK2	0.000200239	0.15919	15	47	769	6532
Cluster_Peak14	Cluster_YeasTractDirect_ROX1	0.000223505	0.177687	7	47	175	6532
Cluster_Peak14	Cluster_ScherrerRBP_MDH3	0.000282496	0.224584	4	47	45	6532
Cluster_Peak14	Cluster_Harbison_GAT3_YPD	0.000488563	0.388407	3	47	22	6532
Cluster_Peak14	Cluster_Harbison_MAL33_H2O2Hi	0.000635664	0.505353	3	47	24	6532
Cluster_Peak14	Cluster_Harbison_DAT1_YPD	0.00319461	2.53971	2	47	12	6532
Cluster_Peak14	Cluster_Harbison_PDR1_YPD	0.00540121	4.29396	3	47	50	6532
Cluster_Peak14	Cluster_YeasTractDirect_HAP5	0.00662837	5.26955	5	47	167	6532
Cluster_Peak14	Cluster_YeasTractDirect_RLM1	0.00828861	6.58945	4	47	112	6532
Cluster_Peak14	Cluster_YeasTractDirect_YOX1	0.00879738	6.99391	7	47	331	6532
Cluster_Peak15	Cluster_YeasTractDirect_PHO4	8.49e-13	6.75e-10	30	152	279	6532
Cluster_Peak15	Cluster_MacIsaac_PHO4	9.81e-12	7.8e-09	10	152	21	6532
Cluster_Peak15	Cluster_YeasTractDirect_CBF1	3.12e-07	0.000248079	24	152	322	6532
Cluster_Peak15	Cluster_Harbison_PHO4_Pi-	5.85e-06	0.00464936	6	152	21	6532
Cluster_Peak15	Cluster_Harbison_ARG81_SM	4.29e-05	0.034068	5	152	18	6532
Cluster_Peak15	Cluster_Harbison_THI2_Thi-	5.38e-05	0.0427803	6	152	30	6532
Cluster_Peak15	Cluster_MacIsaac_GCN4	7.26e-05	0.0577116	11	152	116	6532
Cluster_Peak15	Cluster_Harbison_DAL81_RAPA	9.36e-05	0.074417	8	152	63	6532
Cluster_Peak15	Cluster_Harbison_CBF1_SM	0.000117745	0.0936075	13	152	166	6532
Cluster_Peak15	Cluster_YeasTractDirect_ARG81	0.000157441	0.125166	9	152	86	6532
Cluster_Peak15	Cluster_Harbison_ARG81_YPD	0.000171105	0.136029	4	152	13	6532
Cluster_Peak15	Cluster_Harbison_GCN4_YPD	0.000202077	0.160651	7	152	53	6532
Cluster_Peak15	Cluster_Harbison_GCN4_RAPA	0.000221132	0.1758	10	152	110	6532
Cluster_Peak15	Cluster_MacIsaac_ARG81	0.000234711	0.186595	3	152	6	6532
Cluster_Peak15	Cluster_YeasTractDirect_GCN4	0.000335023	0.266343	17	152	287	6532
Cluster_Peak15	Cluster_Harbison_BAS1_YPD	0.000407302	0.323805	5	152	28	6532
Cluster_Peak15	Cluster_Harbison_STP1_SM	0.00055361	0.44012	6	152	45	6532
Cluster_Peak15	Cluster_Harbison_GCN4_SM	0.000620901	0.493616	10	152	125	6532
Cluster_Peak15	Cluster_Harbison_ARG80_YPD	0.000936234	0.744306	3	152	9	6532
Cluster_Peak15	Cluster_MacIsaac_CBF1	0.00113172	0.89972	11	152	159	6532
Cluster_Peak15	Cluster_YeasTractDirect_HIR2	0.00162787	1.29415	6	152	55	6532
Cluster_Peak15	Cluster_Venters25-37C_Rna14	0.00273041	2.17068	23	152	534	6532
Cluster_Peak15	Cluster_YeasTractDirect_BAS1	0.00332868	2.6463	8	152	107	6532
Cluster_Peak15	Cluster_YeasTractDirect_DAL81	0.0041877	3.32922	12	152	215	6532
Cluster_Peak15	Cluster_Venters25-37C_Srb4	0.00461682	3.67037	22	152	524	6532
Cluster_Peak15	Cluster_YeasTractDirect_MAC1	0.00478661	3.80536	7	152	90	6532
Cluster_Peak15	Cluster_MacIsaac_BAS1	0.00543756	4.32286	4	152	31	6532
Cluster_Peak15	Cluster_Venters25-37C_Cha4	0.00891274	7.08563	25	152	657	6532
Cluster_Peak15	Cluster_Harbison_MET32_YPD	0.00930654	7.3987	4	152	36	6532
Cluster_Peak15	Cluster_Venters25-37C_Rsc1	0.00974289	7.7456	42	152	1281	6532
Cluster_Peak15	Cluster_YeasTractDirect_CIN5	0.00987535	7.8509	21	152	526	6532
Cluster_Peak16	Cluster_YeasTractDirect_PUT3	2.71e-07	0.000215726	7	25	124	6532
Cluster_Peak16	Cluster_Harbison_PUT3_H2O2Lo	3e-06	0.00238726	5	25	62	6532
Cluster_Peak16	Cluster_Harbison_RCS1_H2O2Hi	6.34e-06	0.00503913	4	25	33	6532
Cluster_Peak16	Cluster_MacIsaac_AFT1	1.25e-05	0.00997339	4	25	39	6532
Cluster_Peak16	Cluster_MacIsaac_AFT2	4.99e-05	0.0396832	4	25	55	6532
Cluster_Peak16	Cluster_Harbison_MAC1_YPD	0.000136366	0.108411	3	25	27	6532
Cluster_Peak16	Cluster_YeasTractDirect_AFT1	0.000417575	0.331972	7	25	381	6532
Cluster_Peak16	Cluster_Harbison_AFT2_H2O2Lo	0.00176916	1.40648	3	25	64	6532
Cluster_Peak16	Cluster_YeasTractDirect_AFT2	0.00237755	1.89015	4	25	151	6532
Cluster_Peak16	Cluster_Harbison_NRG1_H2O2Hi	0.00452771	3.59953	3	25	89	6532
Cluster_Peak16	Cluster_YeasTractDirect_MAC1	0.00467206	3.71428	3	25	90	6532
Cluster_Peak16	Cluster_Harbison_NRG1_H2O2Lo	0.00731997	5.81937	2	25	34	6532
Cluster_Peak17	Cluster_Venters25-37C_Swr1	2.07e-16	1.64e-13	790	1264	3413	6532
Cluster_Peak17	Cluster_Venters25-37C_Ssl2	5.46e-15	4.34e-12	592	1264	2434	6532
Cluster_Peak17	Cluster_Venters25-37C_Vps72	4.3e-14	3.42e-11	783	1264	3432	6532
Cluster_Peak17	Cluster_Venters25-37C_Ssl1	5.32e-13	4.23e-10	790	1264	3497	6532
Cluster_Peak17	Cluster_Venters25-37C_Sua7	4.17e-11	3.32e-08	771	1264	3449	6532
Cluster_Peak17	Cluster_Venters25-37C_Rad3	9.09e-11	7.23e-08	704	1264	3110	6532
Cluster_Peak17	Cluster_Venters25-37C_TBP	1.38e-10	1.1e-07	525	1264	2212	6532
Cluster_Peak17	Cluster_Venters25-37C_Rpb7	5.78e-10	4.59e-07	481	1264	2013	6532
Cluster_Peak17	Cluster_Venters25-37C_Htz1	7.42e-10	5.9e-07	745	1264	3350	6532
Cluster_Peak17	Cluster_Venters25-37C_Rpb2	8.91e-10	7.08e-07	395	1264	1603	6532
Cluster_Peak17	Cluster_Venters25-37C_Bdf1	2.38e-09	1.89e-06	746	1264	3371	6532
Cluster_Peak17	Cluster_Venters25-37C_Tfa1	2.41e-09	1.91e-06	633	1264	2789	6532
Cluster_Peak17	Cluster_Venters25-37C_Reb1	2.47e-09	1.96e-06	460	1264	1928	6532
Cluster_Peak17	Cluster_Venters25-37C_Tfg1	3.77e-09	3e-06	677	1264	3020	6532
Cluster_Peak17	Cluster_Venters25-37C_Bur6	8.86e-09	7.04e-06	589	1264	2584	6532
Cluster_Peak17	Cluster_Venters25-37C_Rsc9	1.28e-08	1.01e-05	702	1264	3166	6532
Cluster_Peak17	Cluster_Venters25-37C_TAF1	5.76e-08	4.58e-05	579	1264	2560	6532
Cluster_Peak17	Cluster_Venters25-37C_Esa1	1.28e-07	0.000102057	380	1264	1590	6532
Cluster_Peak17	Cluster_Venters25-37C_Tfb1	1.53e-07	0.000122022	482	1264	2090	6532
Cluster_Peak17	Cluster_TsvetanovaRBP_SCD6	2.38e-07	0.000189412	398	1264	1685	6532
Cluster_Peak17	Cluster_MacIsaac_RPN4	3.25e-07	0.000258666	30	1264	63	6532
Cluster_Peak17	Cluster_Venters25-37C_Swc1	7.39e-07	0.000587334	348	1264	1459	6532
Cluster_Peak17	Cluster_Venters25-37C_Rpb3	3.28e-06	0.00261123	324	1264	1364	6532
Cluster_Peak17	Cluster_Venters25-37C_Taf13	3.52e-06	0.00279603	444	1264	1949	6532
Cluster_Peak17	Cluster_Venters25-37C_Rsc8	4.47e-06	0.00355536	341	1264	1450	6532
Cluster_Peak17	Cluster_Venters25-37C_Spt6	7.61e-06	0.00604882	194	1264	764	6532
Cluster_Peak17	Cluster_MacIsaac_ABF1	8.82e-06	0.00701538	62	1264	191	6532
Cluster_Peak17	Cluster_Venters25-37C_Ncb2	1.07e-05	0.00850751	382	1264	1662	6532
Cluster_Peak17	Cluster_Venters25-37C_Ioc2	1.12e-05	0.00893061	364	1264	1575	6532
Cluster_Peak17	Cluster_TsvetanovaRBP_UBP3	1.15e-05	0.00910416	261	1264	1081	6532
Cluster_Peak17	Cluster_Venters25-37C_Cyc8	1.17e-05	0.00932776	455	1264	2023	6532
Cluster_Peak17	Cluster_Venters25-37C_Gcn5	1.39e-05	0.0110262	403	1264	1769	6532
Cluster_Peak17	Cluster_Venters25-37C_Nut1	1.47e-05	0.0116626	449	1264	1997	6532
Cluster_Peak17	Cluster_Venters25-37C_Bdf2	1.68e-05	0.0133594	366	1264	1591	6532
Cluster_Peak17	Cluster_Harbison_RPN4_H2O2Lo	2.13e-05	0.0169381	27	1264	64	6532
Cluster_Peak17	Cluster_ScherrerRBP_STI1	2.92e-05	0.0232262	33	1264	86	6532
Cluster_Peak17	Cluster_Venters25-37C_Bur2	3.64e-05	0.0289428	277	1264	1173	6532
Cluster_Peak17	Cluster_Venters25-37C_Hos1	3.87e-05	0.030747	301	1264	1289	6532
Cluster_Peak17	Cluster_Venters25-37C_Rpo21	3.98e-05	0.0316407	221	1264	909	6532
Cluster_Peak17	Cluster_MacIsaac_REB1	4.23e-05	0.0336496	64	1264	208	6532
Cluster_Peak17	Cluster_MacIsaac_BAS1	5.54e-05	0.0440774	16	1264	31	6532
Cluster_Peak17	Cluster_Venters25-37C_Nhp6a	6.07e-05	0.0482481	388	1264	1720	6532
Cluster_Peak17	Cluster_YeasTractDirect_REB1	6.57e-05	0.0522016	127	1264	483	6532
Cluster_Peak17	Cluster_Venters25-37C_Tfa2	7.23e-05	0.0575055	339	1264	1483	6532
Cluster_Peak17	Cluster_Venters25-37C_Rad6	7.23e-05	0.0575078	255	1264	1078	6532
Cluster_Peak17	Cluster_YeasTractDirect_RPN4	7.41e-05	0.0588928	59	1264	191	6532
Cluster_Peak17	Cluster_YeasTractDirect_ABF1	0.00010704	0.0850964	121	1264	461	6532
Cluster_Peak17	Cluster_Venters25-37C_Kin28	0.000107576	0.0855232	295	1264	1276	6532
Cluster_Peak17	Cluster_Venters25-37C_Ino80	0.000111161	0.0883732	571	1264	2648	6532
Cluster_Peak17	Cluster_TsvetanovaRBP_ARF3	0.000115459	0.0917898	205	1264	848	6532
Cluster_Peak17	Cluster_Venters25-37C_Snf5	0.00011621	0.0923873	238	1264	1004	6532
Cluster_Peak17	Cluster_Venters25-37C_Itc1	0.000162753	0.129389	485	1264	2221	6532
Cluster_Peak17	Cluster_Venters25-37C_Yap6	0.000170363	0.135438	264	1264	1134	6532
Cluster_Peak17	Cluster_Venters25-37C_Paf1	0.00017625	0.140118	272	1264	1173	6532
Cluster_Peak17	Cluster_Venters25-37C_Rgr1	0.000214091	0.170202	499	1264	2297	6532
Cluster_Peak17	Cluster_Venters25-37C_Srb5	0.00029965	0.238222	429	1264	1953	6532
Cluster_Peak17	Cluster_Venters25-37C_Rsc1	0.000457476	0.363693	291	1264	1281	6532
Cluster_Peak17	Cluster_Venters25-37C_Irc20	0.000477266	0.379426	376	1264	1699	6532
Cluster_Peak17	Cluster_Venters25-37C_Hfi1	0.000488014	0.387971	278	1264	1219	6532
Cluster_Peak17	Cluster_Venters25-37C_Ycs4	0.000514531	0.409052	317	1264	1410	6532
Cluster_Peak17	Cluster_Venters25-37C_Xbp1	0.000580034	0.461127	342	1264	1535	6532
Cluster_Peak17	Cluster_Harbison_UME1_YPD	0.000692739	0.550727	7	1264	10	6532
Cluster_Peak17	Cluster_Venters25-37C_Rsc2	0.000723653	0.575304	252	1264	1100	6532
Cluster_Peak17	Cluster_Venters25-37C_Rfx1	0.000747152	0.593986	233	1264	1009	6532
Cluster_Peak17	Cluster_Venters25-37C_Ctr9	0.000781932	0.621636	281	1264	1242	6532
Cluster_Peak17	Cluster_Harbison_UGA3_SM	0.00101555	0.807359	6	1264	8	6532
Cluster_Peak17	Cluster_Harbison_DAL81_RAPA	0.0010422	0.828551	23	1264	63	6532
Cluster_Peak17	Cluster_Venters25-37C_Sir2	0.0011634	0.924901	236	1264	1031	6532
Cluster_Peak17	Cluster_TsvetanovaRBP_PAD1	0.0012323	0.979682	26	1264	75	6532
Cluster_Peak17	Cluster_YeasTractDirect_SWI6	0.00124478	0.989597	49	1264	168	6532
Cluster_Peak17	Cluster_Venters25-37C_Taf14	0.00125011	0.993835	279	1264	1241	6532
Cluster_Peak17	Cluster_Venters25-37C_Fkh2	0.0012636	1.00456	163	1264	684	6532
Cluster_Peak17	Cluster_Venters25-37C_Rxt2	0.00134245	1.06725	427	1264	1975	6532
Cluster_Peak17	Cluster_TsvetanovaRBP_HSP26	0.00140659	1.11824	74	1264	277	6532
Cluster_Peak17	Cluster_TsvetanovaRBP_VTC1	0.00142507	1.13293	66	1264	242	6532
Cluster_Peak17	Cluster_TsvetanovaRBP_CRG1	0.00144545	1.14913	104	1264	412	6532
Cluster_Peak17	Cluster_MacIsaac_MCM1	0.00177497	1.4111	20	1264	54	6532
Cluster_Peak17	Cluster_Harbison_STB1_YPD	0.00196819	1.56471	10	1264	20	6532
Cluster_Peak17	Cluster_YeasTractDirect_FKH1	0.00213691	1.69884	59	1264	215	6532
Cluster_Peak17	Cluster_Venters25-37C_Spt7	0.00214978	1.70908	218	1264	955	6532
Cluster_Peak17	Cluster_Venters25-37C_Ahc1	0.00222853	1.77169	248	1264	1101	6532
Cluster_Peak17	Cluster_Venters25-37C_Taf4	0.00245813	1.95422	420	1264	1954	6532
Cluster_Peak17	Cluster_Venters25-37C_Aor1	0.00260465	2.0707	248	1264	1104	6532
Cluster_Peak17	Cluster_Venters25-37C_Mot1	0.00288332	2.29224	74	1264	284	6532
Cluster_Peak17	Cluster_MacIsaac_FKH1	0.00320986	2.55184	22	1264	64	6532
Cluster_Peak17	Cluster_Venters25-37C_Set2	0.00368973	2.93334	276	1264	1248	6532
Cluster_Peak17	Cluster_Venters25-37C_Ino4	0.00378861	3.01194	312	1264	1426	6532
Cluster_Peak17	Cluster_MacIsaac_NDD1	0.0042247	3.35863	18	1264	50	6532
Cluster_Peak17	Cluster_Harbison_RCS1_H2O2Lo	0.00448864	3.56847	43	1264	152	6532
Cluster_Peak17	Cluster_Venters25-37C_Hpa3	0.00458337	3.64378	147	1264	628	6532
Cluster_Peak17	Cluster_Venters25-37C_Isw1	0.00506324	4.02528	421	1264	1977	6532
Cluster_Peak17	Cluster_MacIsaac_PHO2	0.00507555	4.03507	17	1264	47	6532
Cluster_Peak17	Cluster_Venters25-37C_Ume6	0.0055481	4.41074	306	1264	1405	6532
Cluster_Peak17	Cluster_YeasTractDirect_MBP1	0.00559003	4.44407	83	1264	332	6532
Cluster_Peak17	Cluster_Venters25-37C_Gcr1	0.0056603	4.49993	126	1264	532	6532
Cluster_Peak17	Cluster_Venters25-37C_Taf5	0.00594831	4.7289	136	1264	580	6532
Cluster_Peak17	Cluster_Venters25-37C_Ioc3	0.00595697	4.73579	299	1264	1372	6532
Cluster_Peak17	Cluster_Venters25-37C_Fkh1	0.00654974	5.20704	427	1264	2014	6532
Cluster_Peak17	Cluster_Venters25-37C_Hda1	0.0066297	5.27061	358	1264	1668	6532
Cluster_Peak17	Cluster_Venters25-37C_Pho2	0.00676261	5.37628	225	1264	1011	6532
Cluster_Peak17	Cluster_Venters25-37C_Stp1	0.00698961	5.55674	231	1264	1041	6532
Cluster_Peak17	Cluster_YeasTractDirect_DAL82	0.00741007	5.89101	43	1264	156	6532
Cluster_Peak17	Cluster_Venters25-37C_Rvb1	0.00758275	6.02828	173	1264	761	6532
Cluster_Peak17	Cluster_YeasTractDirect_ACE2	0.00765533	6.08598	39	1264	139	6532
Cluster_Peak17	Cluster_Venters25-37C_Dst1	0.0076765	6.10282	199	1264	887	6532
Cluster_Peak17	Cluster_Venters25-37C_Gcn4	0.00774436	6.15676	133	1264	570	6532
Cluster_Peak17	Cluster_Venters25-37C_Zap1	0.00818477	6.50689	257	1264	1172	6532
Cluster_Peak17	Cluster_Venters25-37C_Not3	0.00836713	6.65187	212	1264	952	6532
Cluster_Peak17	Cluster_Venters25-37C_Pob3	0.00837922	6.66148	280	1264	1286	6532
Cluster_Peak17	Cluster_Venters25-37C_Fhl1	0.00871705	6.93005	189	1264	841	6532
Cluster_Peak17	Cluster_Venters25-37C_Rph1	0.00904216	7.18852	342	1264	1596	6532
Cluster_Peak17	Cluster_Venters25-37C_Spt2	0.00920001	7.31401	230	1264	1042	6532
Cluster_Peak17	Cluster_Venters25-37C_Rpd3	0.00946121	7.52166	400	1264	1888	6532
Cluster_Peak17	Cluster_Venters25-37C_Arp6	0.00971206	7.72109	177	1264	785	6532
Cluster_Peak18	Cluster_Harbison_HAL9_YPD	2.05e-05	0.0163119	4	48	23	6532
Cluster_Peak18	Cluster_Harbison_YAP1_H2O2Lo	3.41e-05	0.0270974	4	48	26	6532
Cluster_Peak18	Cluster_YeasTractDirect_HAL9	3.44e-05	0.0273693	6	48	86	6532
Cluster_Peak18	Cluster_YeasTractDirect_ROX1	0.000255832	0.203387	7	48	175	6532
Cluster_Peak18	Cluster_YeasTractDirect_YAP7	0.000283988	0.225771	7	48	178	6532
Cluster_Peak18	Cluster_YeasTractDirect_IME1	0.000521414	0.414524	2	48	5	6532
Cluster_Peak18	Cluster_Harbison_YAP1_YPD	0.000536561	0.426566	4	48	52	6532
Cluster_Peak18	Cluster_Harbison_YAP7_H2O2Hi	0.000611405	0.486067	5	48	95	6532
Cluster_Peak18	Cluster_Harbison_YAP6_H2O2Hi	0.000868713	0.690627	4	48	59	6532
Cluster_Peak18	Cluster_Harbison_YAP7_H2O2Lo	0.000884101	0.70286	5	48	103	6532
Cluster_Peak18	Cluster_YeasTractDirect_YAP1	0.00100215	0.796707	10	48	434	6532
Cluster_Peak18	Cluster_Harbison_IME1_H2O2Hi	0.00108473	0.862358	2	48	7	6532
Cluster_Peak18	Cluster_Venters25-37C_Hho1	0.00134535	1.06955	10	48	451	6532
Cluster_Peak18	Cluster_YeasTractDirect_ARG81	0.00350664	2.78778	4	48	86	6532
Cluster_Peak18	Cluster_Harbison_NRG1_H2O2Hi	0.00396762	3.15426	4	48	89	6532
Cluster_Peak18	Cluster_YeasTractDirect_CIN5	0.00419878	3.33803	10	48	526	6532
Cluster_Peak18	Cluster_Venters25-37C_Taf8	0.00423821	3.36937	5	48	147	6532
Cluster_Peak18	Cluster_Harbison_CIN5_H2O2Lo	0.00429681	3.41596	4	48	91	6532
Cluster_Peak18	Cluster_Venters25-37C_Esa1	0.00594379	4.72531	20	48	1590	6532
Cluster_Peak18	Cluster_YeasTractDirect_HAP2	0.00655397	5.21041	5	48	163	6532
Cluster_Peak18	Cluster_Venters25-37C_Tup1	0.00700289	5.5673	8	48	391	6532
Cluster_Peak18	Cluster_YeasTractDirect_HAP5	0.00724951	5.76336	5	48	167	6532
Cluster_Peak19	Cluster_YeasTractDirect_YRM1	4.72e-06	0.00375198	4	35	22	6532
Cluster_Peak19	Cluster_YeasTractDirect_YRR1	0.000336791	0.267749	3	35	26	6532
Cluster_Peak19	Cluster_MacIsaac_YAP7	0.00429375	3.41353	3	35	62	6532
Cluster_Peak19	Cluster_Venters25-37C_Snf5	0.00439999	3.498	12	35	1004	6532
Cluster_Peak19	Cluster_YeasTractDirect_CAD1	0.004649	3.69595	5	35	208	6532
Cluster_Peak19	Cluster_Harbison_SMK1_YPD	0.00537228	4.27096	1	35	1	6532
Cluster_Peak19	Cluster_Venters25-37C_Ino80	0.00623406	4.95608	22	35	2648	6532
Cluster_Peak2	Cluster_YeasTractDirect_ACE2	2.12e-18	1.69e-15	23	98	139	6532
Cluster_Peak2	Cluster_MacIsaac_ACE2	4.21e-12	3.35e-09	11	98	38	6532
Cluster_Peak2	Cluster_YeasTractDirect_SWI5	4.85e-11	3.85e-08	19	98	195	6532
Cluster_Peak2	Cluster_MacIsaac_SWI5	2.22e-10	1.76e-07	11	98	53	6532
Cluster_Peak2	Cluster_Harbison_SWI5_YPD	8.09e-09	6.43e-06	11	98	73	6532
Cluster_Peak2	Cluster_YeasTractDirect_SKN7	2.3e-06	0.00182569	23	98	530	6532
Cluster_Peak2	Cluster_Venters25-37C_Wtm2	7.62e-06	0.00605668	29	98	835	6532
Cluster_Peak2	Cluster_Harbison_ACE2_YPD	1.21e-05	0.00961272	7	98	53	6532
Cluster_Peak2	Cluster_YeasTractDirect_FHL1	1.21e-05	0.0096509	27	98	762	6532
Cluster_Peak2	Cluster_Venters25-37C_Skn7	1.23e-05	0.00974757	26	98	717	6532
Cluster_Peak2	Cluster_Venters25-37C_Hpr1	1.26e-05	0.00999401	22	98	544	6532
Cluster_Peak2	Cluster_Venters25-37C_Rph1	1.71e-05	0.0135887	43	98	1596	6532
Cluster_Peak2	Cluster_YeasTractDirect_STE12	2.27e-05	0.018086	48	98	1900	6532
Cluster_Peak2	Cluster_Venters25-37C_Ycg1	4.14e-05	0.0329107	24	98	676	6532
Cluster_Peak2	Cluster_Venters25-37C_Spt20	4.32e-05	0.0343647	20	98	503	6532
Cluster_Peak2	Cluster_Venters25-37C_Rei1	4.47e-05	0.0355471	31	98	1014	6532
Cluster_Peak2	Cluster_Venters25-37C_Snf7	5.72e-05	0.0454902	17	98	390	6532
Cluster_Peak2	Cluster_Venters25-37C_Arp6	6.04e-05	0.0480093	26	98	785	6532
Cluster_Peak2	Cluster_Venters25-37C_Tfb1	6.37e-05	0.0506711	50	98	2090	6532
Cluster_Peak2	Cluster_Venters25-37C_Snf4	6.88e-05	0.0546811	26	98	791	6532
Cluster_Peak2	Cluster_Venters25-37C_Otu1	7.07e-05	0.0561947	23	98	653	6532
Cluster_Peak2	Cluster_YeasTractDirect_FKH1	7.95e-05	0.0632376	12	98	215	6532
Cluster_Peak2	Cluster_Venters25-37C_Aor1	9.28e-05	0.0737384	32	98	1104	6532
Cluster_Peak2	Cluster_Venters25-37C_Rvb2	0.000101913	0.0810209	28	98	907	6532
Cluster_Peak2	Cluster_YeasTractDirect_SOK2	0.000118525	0.0942275	25	98	769	6532
Cluster_Peak2	Cluster_Venters25-37C_Sif2	0.000129299	0.102793	18	98	458	6532
Cluster_Peak2	Cluster_Venters25-37C_Sfp1	0.000130347	0.103626	36	98	1336	6532
Cluster_Peak2	Cluster_Venters25-37C_Ada2	0.000132995	0.105731	20	98	545	6532
Cluster_Peak2	Cluster_Venters25-37C_Ure2	0.000139605	0.110986	26	98	825	6532
Cluster_Peak2	Cluster_MacIsaac_SKN7	0.000151764	0.120652	8	98	104	6532
Cluster_Peak2	Cluster_Venters25-37C_Rxt2	0.000154711	0.122996	47	98	1975	6532
Cluster_Peak2	Cluster_Venters25-37C_Taf14	0.000159795	0.127037	34	98	1241	6532
Cluster_Peak2	Cluster_Venters25-37C_Rgr1	0.000193613	0.153922	52	98	2297	6532
Cluster_Peak2	Cluster_YeasTractDirect_TEC1	0.000199495	0.158598	18	98	474	6532
Cluster_Peak2	Cluster_Venters25-37C_Msn2	0.000201346	0.16007	32	98	1149	6532
Cluster_Peak2	Cluster_Venters25-37C_Gcn4	0.000244322	0.194236	20	98	570	6532
Cluster_Peak2	Cluster_Venters25-37C_Hfi1	0.000264886	0.210585	33	98	1219	6532
Cluster_Peak2	Cluster_Venters25-37C_Bre1	0.000313696	0.249389	26	98	867	6532
Cluster_Peak2	Cluster_MacIsaac_SWI4	0.000324717	0.25815	7	98	88	6532
Cluster_Peak2	Cluster_Venters25-37C_Rxt1	0.000331892	0.263854	28	98	971	6532
Cluster_Peak2	Cluster_Venters25-37C_Yap6	0.000372616	0.29623	31	98	1134	6532
Cluster_Peak2	Cluster_Venters25-37C_Med6	0.000395226	0.314204	18	98	501	6532
Cluster_Peak2	Cluster_Harbison_SKN7_H2O2Lo	0.00048047	0.381973	8	98	123	6532
Cluster_Peak2	Cluster_Venters25-37C_Fkh1	0.00054722	0.43504	46	98	2014	6532
Cluster_Peak2	Cluster_Venters25-37C_Spt7	0.00060501	0.480983	27	98	955	6532
Cluster_Peak2	Cluster_Venters25-37C_Zap1	0.000671049	0.533484	31	98	1172	6532
Cluster_Peak2	Cluster_Venters25-37C_Paf1	0.000681183	0.54154	31	98	1173	6532
Cluster_Peak2	Cluster_Venters25-37C_Rvb1	0.000686205	0.545533	23	98	761	6532
Cluster_Peak2	Cluster_YeasTractDirect_RAP1	0.000725812	0.577021	33	98	1286	6532
Cluster_Peak2	Cluster_Venters25-37C_Swi5	0.000759173	0.603542	19	98	575	6532
Cluster_Peak2	Cluster_Venters25-37C_Wtm1	0.000799195	0.63536	16	98	442	6532
Cluster_Peak2	Cluster_Venters25-37C_Irr1	0.000977263	0.776924	14	98	364	6532
Cluster_Peak2	Cluster_Venters25-37C_Brn1	0.00119496	0.94999	23	98	792	6532
Cluster_Peak2	Cluster_Venters25-37C_Tfc6	0.00132246	1.05136	31	98	1219	6532
Cluster_Peak2	Cluster_Venters25-37C_Epl1	0.00135706	1.07887	21	98	700	6532
Cluster_Peak2	Cluster_Venters25-37C_Rsc8	0.00146977	1.16846	35	98	1450	6532
Cluster_Peak2	Cluster_Venters25-37C_Bur2	0.00149055	1.18499	30	98	1173	6532
Cluster_Peak2	Cluster_MacIsaac_STE12	0.00169597	1.3483	7	98	116	6532
Cluster_Peak2	Cluster_Venters25-37C_Rad6	0.0017951	1.4271	28	98	1078	6532
Cluster_Peak2	Cluster_Venters25-37C_Ctr9	0.00180898	1.43814	31	98	1242	6532
Cluster_Peak2	Cluster_Venters25-37C_Srb4	0.00182488	1.45078	17	98	524	6532
Cluster_Peak2	Cluster_YeasTractDirect_CIN5	0.00190131	1.51154	17	98	526	6532
Cluster_Peak2	Cluster_Venters25-37C_Jhd2	0.00194053	1.54272	17	98	527	6532
Cluster_Peak2	Cluster_Harbison_NRG1_H2O2Hi	0.00208411	1.65686	6	98	89	6532
Cluster_Peak2	Cluster_Venters25-37C_Yap5	0.00208779	1.6598	19	98	626	6532
Cluster_Peak2	Cluster_Venters25-37C_Uga3	0.00224649	1.78596	20	98	679	6532
Cluster_Peak2	Cluster_Venters25-37C_Zms1	0.00228826	1.81917	19	98	631	6532
Cluster_Peak2	Cluster_Venters25-37C_Cyc8	0.00241419	1.91928	44	98	2023	6532
Cluster_Peak2	Cluster_Venters25-37C_Ctk1	0.00243814	1.93832	33	98	1377	6532
Cluster_Peak2	Cluster_YeasTractDirect_SKO1	0.00266741	2.12059	17	98	543	6532
Cluster_Peak2	Cluster_Venters25-37C_Caf130	0.00275735	2.19209	21	98	741	6532
Cluster_Peak2	Cluster_Harbison_SKN7_H2O2Hi	0.00278244	2.21204	5	98	65	6532
Cluster_Peak2	Cluster_Venters25-37C_Isw2	0.00308766	2.45469	35	98	1511	6532
Cluster_Peak2	Cluster_Venters25-37C_Tfc7	0.0032149	2.55585	26	98	1012	6532
Cluster_Peak2	Cluster_Venters25-37C_Irc20	0.0035624	2.83211	38	98	1699	6532
Cluster_Peak2	Cluster_MacIsaac_RLM1	0.00357983	2.84596	3	98	21	6532
Cluster_Peak2	Cluster_Venters25-37C_Mft1	0.00388543	3.08892	17	98	563	6532
Cluster_Peak2	Cluster_MacIsaac_YAP6	0.00408473	3.24736	4	98	44	6532
Cluster_Peak2	Cluster_MacIsaac_NRG1	0.0040871	3.24924	5	98	71	6532
Cluster_Peak2	Cluster_Venters25-37C_Bre2	0.00418156	3.32434	24	98	924	6532
Cluster_Peak2	Cluster_Venters25-37C_Nhp6a	0.00446578	3.5503	38	98	1720	6532
Cluster_Peak2	Cluster_Venters25-37C_Gal4	0.00448222	3.56336	13	98	383	6532
Cluster_Peak2	Cluster_YeasTractDirect_SWI4	0.00481154	3.82517	14	98	432	6532
Cluster_Peak2	Cluster_YeasTractDirect_XBP1	0.00521932	4.14936	13	98	390	6532
Cluster_Peak2	Cluster_Venters25-37C_Dst1	0.00523904	4.16504	23	98	887	6532
Cluster_Peak2	Cluster_Venters25-37C_Tfc8	0.00554278	4.40651	14	98	439	6532
Cluster_Peak2	Cluster_MacIsaac_FKH2	0.00578036	4.59539	5	98	77	6532
Cluster_Peak2	Cluster_Venters25-37C_Hht1	0.00612761	4.87145	24	98	952	6532
Cluster_Peak2	Cluster_Harbison_FKH2_YPD	0.00644076	5.1204	5	98	79	6532
Cluster_Peak2	Cluster_Venters25-37C_Pho2	0.0065202	5.18356	25	98	1011	6532
Cluster_Peak2	Cluster_Venters25-37C_Swi3	0.00671048	5.33483	40	98	1880	6532
Cluster_Peak2	Cluster_Harbison_PIP2_YPD	0.00737765	5.86523	3	98	27	6532
Cluster_Peak2	Cluster_Venters25-37C_Srb5	0.00754561	5.99876	41	98	1953	6532
Cluster_Peak2	Cluster_Venters25-37C_Sir2	0.00837416	6.65746	25	98	1031	6532
Cluster_Peak2	Cluster_Harbison_DIG1_BUT14	0.0084921	6.75122	4	98	54	6532
Cluster_Peak2	Cluster_Venters25-37C_Tfa1	0.00853798	6.78769	54	98	2789	6532
Cluster_Peak2	Cluster_Venters25-37C_Not5	0.00866333	6.88735	8	98	195	6532
Cluster_Peak2	Cluster_Venters25-37C_Leu3	0.00885337	7.03843	19	98	714	6532
Cluster_Peak2	Cluster_Venters25-37C_Cdc39	0.00896388	7.12629	12	98	370	6532
Cluster_Peak2	Cluster_Venters25-37C_Dhh1	0.00935008	7.43331	10	98	282	6532
Cluster_Peak2	Cluster_Venters25-37C_Rlr1	0.00946742	7.5266	15	98	516	6532
Cluster_Peak2	Cluster_Venters25-37C_Spt2	0.00956827	7.60677	25	98	1042	6532
Cluster_Peak2	Cluster_Venters25-37C_Spt3	0.0096226	7.64997	41	98	1979	6532
Cluster_Peak2	Cluster_Venters25-37C_Bas1	0.0097326	7.73741	21	98	826	6532
Cluster_Peak2	Cluster_Venters25-37C_Tfb3	0.00997585	7.9308	30	98	1328	6532
Cluster_Peak20	Cluster_YeasTractDirect_CBF1	0.00205167	1.63108	6	28	322	6532
Cluster_Peak20	Cluster_ScherrerRBP_LAP3	0.00855548	6.80161	1	28	2	6532
Cluster_Peak20	Cluster_MacIsaac_YRR1	0.00855548	6.80161	1	28	2	6532
Cluster_Peak21	Cluster_YeasTractDirect_HAP1	8.68e-14	6.9e-11	13	33	147	6532
Cluster_Peak21	Cluster_MacIsaac_HAP1	3.59e-13	2.85e-10	10	33	65	6532
Cluster_Peak21	Cluster_Harbison_HAP1_YPD	3.1e-11	2.46e-08	10	33	100	6532
Cluster_Peak21	Cluster_MacIsaac_HAP4	5.15e-07	0.000409396	5	33	33	6532
Cluster_Peak21	Cluster_YeasTractDirect_HAP2	1.03e-06	0.000821776	8	33	163	6532
Cluster_Peak21	Cluster_YeasTractDirect_HAP4	2.92e-06	0.00232127	8	33	187	6532
Cluster_Peak21	Cluster_YeasTractDirect_HAP3	9.82e-06	0.00780418	7	33	156	6532
Cluster_Peak21	Cluster_YeasTractDirect_HAP5	1.54e-05	0.0122051	7	33	167	6532
Cluster_Peak21	Cluster_Harbison_HAP4_YPD	4.34e-05	0.0345133	4	33	40	6532
Cluster_Peak21	Cluster_YeasTractDirect_MSN2	0.000439492	0.349396	7	33	284	6532
Cluster_Peak21	Cluster_YeasTractDirect_GSM1	0.00360039	2.86231	2	33	18	6532
Cluster_Peak21	Cluster_Harbison_SPT2_YPD	0.00360039	2.86231	2	33	18	6532
Cluster_Peak21	Cluster_Harbison_GCR2_YPD	0.00489517	3.89166	2	33	21	6532
Cluster_Peak21	Cluster_YeasTractDirect_CBF1	0.00490159	3.89677	6	33	322	6532
Cluster_Peak21	Cluster_Harbison_HAP4_SM	0.00506451	4.02628	1	33	1	6532
Cluster_Peak21	Cluster_MacIsaac_HAP2	0.00637311	5.06662	2	33	24	6532
Cluster_Peak21	Cluster_YeasTractDirect_MGA2	0.00690551	5.48988	2	33	25	6532
Cluster_Peak21	Cluster_Venters25-37C_Taf13	0.00723856	5.75466	17	33	1949	6532
Cluster_Peak21	Cluster_MacIsaac_CBF1	0.00798239	6.346	4	33	159	6532
Cluster_Peak21	Cluster_Harbison_CBF1_SM	0.00926651	7.36687	4	33	166	6532
Cluster_Peak21	Cluster_MacIsaac_GCR2	0.00985666	7.83604	2	33	30	6532
Cluster_Peak22	Cluster_YeasTractDirect_HAP5	1.63e-07	0.000129545	8	26	167	6532
Cluster_Peak22	Cluster_YeasTractDirect_HAP4	5.84e-06	0.00464464	7	26	187	6532
Cluster_Peak22	Cluster_Harbison_HAP4_YPD	1.64e-05	0.0130051	4	26	40	6532
Cluster_Peak22	Cluster_YeasTractDirect_HAP3	2.61e-05	0.0207681	6	26	156	6532
Cluster_Peak22	Cluster_YeasTractDirect_HAP2	3.35e-05	0.0266392	6	26	163	6532
Cluster_Peak22	Cluster_MacIsaac_HAP4	0.000282241	0.224381	3	26	33	6532
Cluster_Peak22	Cluster_Venters25-37C_TAF1	0.00046908	0.372919	19	26	2560	6532
Cluster_Peak22	Cluster_Venters25-37C_Ume6	0.00121683	0.967381	13	26	1405	6532
Cluster_Peak22	Cluster_YeasTractDirect_RGT1	0.00157018	1.24829	3	26	59	6532
Cluster_Peak22	Cluster_MacIsaac_HAP5	0.0027701	2.20223	2	26	20	6532
Cluster_Peak22	Cluster_Harbison_MET4_SM	0.00366166	2.91102	2	26	23	6532
Cluster_Peak22	Cluster_Venters25-37C_Cyc8	0.00421028	3.34717	15	26	2023	6532
Cluster_Peak22	Cluster_Harbison_HAP5_SM	0.00618904	4.92029	2	26	30	6532
Cluster_Peak22	Cluster_YeasTractDirect_CUP2	0.00794559	6.31674	1	26	2	6532
Cluster_Peak22	Cluster_Venters25-37C_Rsc9	0.00953761	7.5824	19	26	3166	6532
Cluster_Peak23	Cluster_YeasTractDirect_RDS1	0.00104569	0.831321	3	35	38	6532
Cluster_Peak23	Cluster_YeasTractDirect_YAP5	0.00211126	1.67845	8	35	449	6532
Cluster_Peak23	Cluster_Venters25-37C_Htz1	0.00459525	3.65322	26	35	3350	6532
Cluster_Peak23	Cluster_Venters25-37C_Spt21	0.00749762	5.96061	4	35	147	6532
Cluster_Peak24	Cluster_Venters25-37C_Fcp1	0.00152828	1.21498	10	33	688	6532
Cluster_Peak24	Cluster_TsvetanovaRBP_HSP26	0.0023183	1.84305	6	33	277	6532
Cluster_Peak24	Cluster_Venters25-37C_Hpa3	0.00308698	2.45415	9	33	628	6532
Cluster_Peak24	Cluster_Venters25-37C_Gcr1	0.00410578	3.2641	8	33	532	6532
Cluster_Peak24	Cluster_Venters25-37C_Pta1	0.00573686	4.5608	8	33	562	6532
Cluster_Peak25	Cluster_Harbison_IME4_YPD	0.00405642	3.22486	2	30	21	6532
Cluster_Peak25	Cluster_Harbison_BAS1_YPD	0.00715748	5.6902	2	30	28	6532
Cluster_Peak25	Cluster_Harbison_THI2_Thi-	0.00819007	6.51111	2	30	30	6532
Cluster_Peak25	Cluster_MacIsaac_BAS1	0.00873005	6.94039	2	30	31	6532
Cluster_Peak25	Cluster_YeasTractDirect_SFL1	0.00985666	7.83604	2	30	33	6532
Cluster_Peak26	Cluster_Harbison_SFP1_H2O2Hi	0.00024747	0.196739	2	60	3	6532
Cluster_Peak26	Cluster_MacIsaac_PUT3	0.00024747	0.196739	2	60	3	6532
Cluster_Peak26	Cluster_MacIsaac_SPT23	0.00703357	5.59169	2	60	14	6532
Cluster_Peak26	Cluster_MacIsaac_YAP6	0.00746982	5.93851	3	60	44	6532
Cluster_Peak26	Cluster_Harbison_PDR3_YPD	0.00806797	6.41404	2	60	15	6532
Cluster_Peak27	Cluster_TsvetanovaRBP_HSP26	0.000552754	0.43944	7	35	277	6532
Cluster_Peak27	Cluster_YeasTractDirect_NDT80	0.00404405	3.21502	2	35	18	6532
Cluster_Peak27	Cluster_Harbison_ASK10_YPD	0.00602431	4.78932	2	35	22	6532
Cluster_Peak27	Cluster_Harbison_HIR3_YPD	0.00657596	5.22789	2	35	23	6532
Cluster_Peak27	Cluster_YeasTractDirect_YOX1	0.00754573	5.99886	6	35	331	6532
Cluster_Peak27	Cluster_YeasTractDirect_YRR1	0.00836287	6.64848	2	35	26	6532
Cluster_Peak29	Cluster_YeasTractDirect_CAD1	0.000114086	0.0906982	7	36	208	6532
Cluster_Peak29	Cluster_Harbison_YAP1_H2O2Lo	0.00036644	0.29132	3	36	26	6532
Cluster_Peak29	Cluster_Venters25-37C_Ume6	0.000520366	0.413691	17	36	1405	6532
Cluster_Peak29	Cluster_YeasTractDirect_HAP3	0.00151008	1.20051	5	36	156	6532
Cluster_Peak29	Cluster_Harbison_YAP7_H2O2Hi	0.00173182	1.37679	4	36	95	6532
Cluster_Peak29	Cluster_YeasTractDirect_HAP5	0.0020411	1.62267	5	36	167	6532
Cluster_Peak29	Cluster_YeasTractDirect_YAP1	0.00206132	1.63875	8	36	434	6532
Cluster_Peak29	Cluster_Venters25-37C_Esa1	0.00228633	1.81763	17	36	1590	6532
Cluster_Peak29	Cluster_YeasTractDirect_YAP7	0.00269807	2.14497	5	36	178	6532
Cluster_Peak29	Cluster_Harbison_YAP1_YPD	0.00282322	2.24446	3	36	52	6532
Cluster_Peak29	Cluster_Harbison_GCN4_RAPA	0.00296161	2.35448	4	36	110	6532
Cluster_Peak29	Cluster_Harbison_GCN4_YPD	0.00298135	2.37017	3	36	53	6532
Cluster_Peak29	Cluster_Harbison_MSN2_H2O2Hi	0.00348815	2.77308	3	36	56	6532
Cluster_Peak29	Cluster_Harbison_RTG3_SM	0.00427497	3.3986	2	36	18	6532
Cluster_Peak29	Cluster_YeasTractDirect_GCN4	0.00436519	3.47033	6	36	287	6532
Cluster_Peak29	Cluster_Harbison_GCN4_SM	0.0046886	3.72743	4	36	125	6532
Cluster_Peak29	Cluster_Harbison_RCS1_YPD	0.00755343	6.00498	2	36	24	6532
Cluster_Peak29	Cluster_YeasTractDirect_SKO1	0.00813555	6.46776	8	36	543	6532
Cluster_Peak29	Cluster_Harbison_RTG3_H2O2Hi	0.00818196	6.50465	2	36	25	6532
Cluster_Peak29	Cluster_YeasTractDirect_NRG1	0.00937879	7.45613	5	36	239	6532
Cluster_Peak3	Cluster_Venters25-37C_Taf8	0.000605294	0.481209	8	85	147	6532
Cluster_Peak3	Cluster_Venters25-37C_Ioc4	0.000691213	0.549515	16	85	506	6532
Cluster_Peak3	Cluster_Venters25-37C_Rpo21	0.00098952	0.786669	23	85	909	6532
Cluster_Peak3	Cluster_Venters25-37C_Wtm2	0.00188487	1.49847	21	85	835	6532
Cluster_Peak3	Cluster_YeasTractDirect_ABF1	0.00227903	1.81183	14	85	461	6532
Cluster_Peak3	Cluster_Venters25-37C_Zms1	0.00271514	2.15854	17	85	631	6532
Cluster_Peak3	Cluster_Venters25-37C_Iws1	0.00275562	2.19072	16	85	577	6532
Cluster_Peak3	Cluster_Venters25-37C_Sas4	0.00308364	2.45149	19	85	752	6532
Cluster_Peak3	Cluster_MacIsaac_ABF1	0.0032397	2.57556	8	85	191	6532
Cluster_Peak3	Cluster_Venters25-37C_Ioc3	0.00331003	2.63148	29	85	1372	6532
Cluster_Peak3	Cluster_ScherrerRBP_MAP1	0.00361106	2.87079	7	85	153	6532
Cluster_Peak3	Cluster_Venters25-37C_Spt6	0.00368628	2.93059	19	85	764	6532
Cluster_Peak3	Cluster_Venters25-37C_Otu1	0.00388416	3.0879	17	85	653	6532
Cluster_Peak3	Cluster_Venters25-37C_TBP	0.00406716	3.23339	41	85	2212	6532
Cluster_Peak3	Cluster_Venters25-37C_Hht1	0.0042109	3.34767	22	85	952	6532
Cluster_Peak3	Cluster_Venters25-37C_Rpb2	0.0047015	3.73769	32	85	1603	6532
Cluster_Peak3	Cluster_Venters25-37C_Srb5	0.00505621	4.01968	37	85	1953	6532
Cluster_Peak3	Cluster_Venters25-37C_Uga3	0.00577872	4.59408	17	85	679	6532
Cluster_Peak3	Cluster_Venters25-37C_Spt2	0.00599375	4.76503	23	85	1042	6532
Cluster_Peak3	Cluster_Venters25-37C_Rpb3	0.00615573	4.89381	28	85	1364	6532
Cluster_Peak3	Cluster_Venters25-37C_Taf14	0.00662426	5.26629	26	85	1241	6532
Cluster_Peak3	Cluster_Venters25-37C_Swi5	0.00668362	5.31348	15	85	575	6532
Cluster_Peak3	Cluster_Venters25-37C_Snf1	0.00714861	5.68315	16	85	636	6532
Cluster_Peak3	Cluster_Venters25-37C_Taf5	0.00722897	5.74703	15	85	580	6532
Cluster_Peak3	Cluster_Harbison_UME6_H2O2Hi	0.00748798	5.95294	4	85	60	6532
Cluster_Peak3	Cluster_Venters25-37C_Reb1	0.00760656	6.04722	36	85	1928	6532
Cluster_Peak3	Cluster_YeasTractDirect_UPC2	0.00875694	6.96177	3	85	33	6532
Cluster_Peak3	Cluster_Venters25-37C_Tfc7	0.0087576	6.96229	22	85	1012	6532
Cluster_Peak3	Cluster_Venters25-37C_Hda1	0.00881328	7.00656	32	85	1668	6532
Cluster_Peak3	Cluster_Venters25-37C_Yng1	0.00884942	7.03529	17	85	709	6532
Cluster_Peak3	Cluster_YeasTractDirect_REB1	0.00906524	7.20686	13	85	483	6532
Cluster_Peak3	Cluster_Venters25-37C_Leu3	0.00947085	7.52932	17	85	714	6532
Cluster_Peak3	Cluster_Venters25-37C_Hpr1	0.00989361	7.86542	14	85	544	6532
Cluster_Peak30	Cluster_MacIsaac_CAD1	0.00124431	0.989223	2	25	14	6532
Cluster_Peak30	Cluster_MacIsaac_YAP7	0.00161405	1.28317	3	25	62	6532
Cluster_Peak30	Cluster_MacIsaac_YAP1	0.00207254	1.64767	2	25	18	6532
Cluster_Peak30	Cluster_Harbison_CAD1_YPD	0.00399771	3.17818	2	25	25	6532
Cluster_Peak30	Cluster_YeasTractDirect_YAP7	0.00430808	3.42492	4	25	178	6532
Cluster_Peak30	Cluster_Venters25-37C_Reb1	0.00502615	3.99579	14	25	1928	6532
Cluster_Peak30	Cluster_Harbison_YAP7_H2O2Hi	0.00543574	4.32142	3	25	95	6532
Cluster_Peak30	Cluster_Harbison_HAP1_YPD	0.00627075	4.98524	3	25	100	6532
Cluster_Peak30	Cluster_Harbison_YAP7_H2O2Lo	0.00680672	5.41134	3	25	103	6532
Cluster_Peak31	Cluster_Venters25-37C_Isw2	0.000926738	0.736757	31	79	1511	6532
Cluster_Peak31	Cluster_YeasTractDirect_STB5	0.00149215	1.18626	7	79	141	6532
Cluster_Peak31	Cluster_YeasTractDirect_SOK2	0.00162731	1.29371	19	79	769	6532
Cluster_Peak31	Cluster_Harbison_MCM1_Alpha	0.00169278	1.34576	5	79	72	6532
Cluster_Peak31	Cluster_Harbison_PHD1_BUT90	0.00269821	2.14508	5	79	80	6532
Cluster_Peak31	Cluster_Harbison_PHD1_YPD	0.00321903	2.55913	4	79	51	6532
Cluster_Peak31	Cluster_Harbison_MCM1_YPD	0.00423607	3.36768	4	79	55	6532
Cluster_Peak31	Cluster_Harbison_UME6_H2O2Hi	0.00578747	4.60103	4	79	60	6532
Cluster_Peak31	Cluster_Harbison_SOK2_BUT14	0.00578747	4.60103	4	79	60	6532
Cluster_Peak31	Cluster_Venters25-37C_Ume6	0.00614922	4.88863	27	79	1405	6532
Cluster_Peak31	Cluster_Venters25-37C_Ino2	0.00686132	5.45475	24	79	1207	6532
Cluster_Peak31	Cluster_Harbison_DIG1_BUT90	0.00715648	5.6894	3	79	33	6532
Cluster_Peak31	Cluster_Venters25-37C_Spt23	0.00726351	5.77449	28	79	1493	6532
Cluster_Peak31	Cluster_Harbison_HMS2_YPD	0.00778152	6.18631	3	79	34	6532
Cluster_Peak31	Cluster_Harbison_GLN3_SM	0.00778152	6.18631	3	79	34	6532
Cluster_Peak31	Cluster_YeasTractDirect_NRG1	0.00792824	6.30295	8	79	239	6532
Cluster_Peak31	Cluster_YeasTractDirect_HOT1	0.00810042	6.43983	4	79	66	6532
Cluster_Peak31	Cluster_MacIsaac_SKN7	0.00824687	6.55626	5	79	104	6532
Cluster_Peak31	Cluster_YeasTractDirect_AFT2	0.00959944	7.63155	6	79	151	6532
Cluster_Peak32	Cluster_Venters25-37C_Htz1	0.00455221	3.61901	34	48	3350	6532
Cluster_Peak32	Cluster_Venters25-37C_Rad3	0.00588315	4.67711	32	48	3110	6532
Cluster_Peak32	Cluster_Venters25-37C_Swr1	0.00665645	5.29188	34	48	3413	6532
Cluster_Peak32	Cluster_Venters25-37C_Dot1	0.00778201	6.1867	14	48	966	6532
Cluster_Peak32	Cluster_Venters25-37C_Nut1	0.00847748	6.7396	23	48	1997	6532
Cluster_Peak32	Cluster_YeasTractDirect_HIR1	0.00907679	7.21605	3	48	59	6532
Cluster_Peak33	Cluster_TsvetanovaRBP_VTC1	4.51e-06	0.00358247	7	20	242	6532
Cluster_Peak33	Cluster_Venters25-37C_Hpa3	0.00922105	7.33073	6	20	628	6532
Cluster_Peak34	Cluster_YeasTractDirect_SKO1	3.29e-05	0.0261893	9	22	543	6532
Cluster_Peak34	Cluster_Venters25-37C_Set2	0.00021661	0.172205	12	22	1248	6532
Cluster_Peak34	Cluster_Venters25-37C_Isw1	0.000267524	0.212682	15	22	1977	6532
Cluster_Peak34	Cluster_Venters25-37C_Rpb2	0.000565329	0.449437	13	22	1603	6532
Cluster_Peak34	Cluster_YeasTractDirect_GTS1	0.00062201	0.494498	3	22	51	6532
Cluster_Peak34	Cluster_Venters25-37C_Hda1	0.000853674	0.678671	13	22	1668	6532
Cluster_Peak34	Cluster_YeasTractDirect_HOT1	0.00132277	1.05161	3	22	66	6532
Cluster_Peak34	Cluster_Venters25-37C_Rpb7	0.00148465	1.1803	14	22	2013	6532
Cluster_Peak34	Cluster_YeasTractDirect_SOK2	0.00250515	1.99159	8	22	769	6532
Cluster_Peak34	Cluster_Venters25-37C_Fhl1	0.00442431	3.51733	8	22	841	6532
Cluster_Peak34	Cluster_Venters25-37C_Rad3	0.00445603	3.54255	17	22	3110	6532
Cluster_Peak34	Cluster_Venters25-37C_Spt3	0.00469192	3.73007	13	22	1979	6532
Cluster_Peak35	Cluster_Harbison_SMK1_YPD	0.00598811	4.76055	1	39	1	6532
Cluster_Peak35	Cluster_ScherrerRBP_YMR1	0.00637713	5.06982	3	39	64	6532
Cluster_Peak36	Cluster_Venters25-37C_Taf8	0.00288765	2.29568	4	27	147	6532
Cluster_Peak36	Cluster_Venters25-37C_Gcr1	0.00480709	3.82164	7	27	532	6532
Cluster_Peak36	Cluster_Harbison_HSF1_H2O2Hi	0.00529897	4.21268	3	27	87	6532
Cluster_Peak36	Cluster_Venters25-37C_Rpt1	0.00618105	4.91394	10	27	1037	6532
Cluster_Peak37	Cluster_YeasTractDirect_MCM1	0.000842899	0.670105	7	28	378	6532
Cluster_Peak37	Cluster_Harbison_NDT80_YPD	0.00204899	1.62895	2	28	16	6532
Cluster_Peak37	Cluster_YeasTractDirect_NDT80	0.00259865	2.06593	2	28	18	6532
Cluster_Peak37	Cluster_Harbison_UPC2_YPD	0.00321004	2.55198	2	28	20	6532
Cluster_Peak37	Cluster_Harbison_RPH1_H2O2Lo	0.0042955	3.41492	1	28	1	6532
Cluster_Peak4	Cluster_YeasTractDirect_GZF3	2.22e-08	1.76e-05	7	37	57	6532
Cluster_Peak4	Cluster_YeasTractDirect_MCM1	5.87e-07	0.000466658	12	37	378	6532
Cluster_Peak4	Cluster_YeasTractDirect_ZAP1	2.18e-06	0.00173336	6	37	70	6532
Cluster_Peak4	Cluster_Venters25-37C_Put3	2.52e-06	0.00200319	4	37	18	6532
Cluster_Peak4	Cluster_Harbison_STE12_BUT14	2.08e-05	0.0165134	6	37	103	6532
Cluster_Peak4	Cluster_Harbison_MCM1_Alpha	4.68e-05	0.0372447	5	37	72	6532
Cluster_Peak4	Cluster_Harbison_STE12_YPD	0.000100618	0.079991	4	37	44	6532
Cluster_Peak4	Cluster_YeasTractDirect_CHA4	0.000110111	0.0875383	5	37	86	6532
Cluster_Peak4	Cluster_YeasTractDirect_HMS1	0.000130608	0.103834	4	37	47	6532
Cluster_Peak4	Cluster_YeasTractDirect_UGA3	0.00022477	0.178692	5	37	100	6532
Cluster_Peak4	Cluster_Venters25-37C_Hos1	0.000266068	0.211524	17	37	1289	6532
Cluster_Peak4	Cluster_Venters25-37C_Ste12	0.000353205	0.280798	3	37	25	6532
Cluster_Peak4	Cluster_YeasTractDirect_GAL4	0.00050443	0.401022	5	37	119	6532
Cluster_Peak4	Cluster_YeasTractDirect_HAP4	0.000563652	0.448103	6	37	187	6532
Cluster_Peak4	Cluster_YeasTractDirect_GAT3	0.000782527	0.622109	5	37	131	6532
Cluster_Peak4	Cluster_YeasTractDirect_MIG3	0.00085569	0.680274	2	37	8	6532
Cluster_Peak4	Cluster_YeasTractDirect_STE12	0.00123199	0.979433	20	37	1900	6532
Cluster_Peak4	Cluster_Venters25-37C_Dig1	0.00133881	1.06436	8	37	394	6532
Cluster_Peak4	Cluster_Harbison_STE12_Alpha	0.00157271	1.2503	4	37	90	6532
Cluster_Peak4	Cluster_YeasTractDirect_ARO80	0.00177546	1.41149	4	37	93	6532
Cluster_Peak4	Cluster_Venters25-37C_Zms1	0.0020553	1.63396	10	37	631	6532
Cluster_Peak4	Cluster_Venters25-37C_Nut1	0.00241466	1.91966	20	37	1997	6532
Cluster_Peak4	Cluster_YeasTractDirect_RTG3	0.0026298	2.09069	5	37	172	6532
Cluster_Peak4	Cluster_YeasTractDirect_BAS1	0.00296589	2.35788	4	37	107	6532
Cluster_Peak4	Cluster_YeasTractDirect_YAP5	0.0030681	2.43914	8	37	449	6532
Cluster_Peak4	Cluster_Venters25-37C_Rpt1	0.00322423	2.56326	13	37	1037	6532
Cluster_Peak4	Cluster_MacIsaac_MCM1	0.00340247	2.70496	3	37	54	6532
Cluster_Peak4	Cluster_Harbison_DIG1_BUT14	0.00340247	2.70496	3	37	54	6532
Cluster_Peak4	Cluster_Harbison_MCM1_YPD	0.00358481	2.84993	3	37	55	6532
Cluster_Peak4	Cluster_MacIsaac_STE12	0.00396858	3.15502	4	37	116	6532
Cluster_Peak4	Cluster_YeasTractDirect_HAC1	0.00451189	3.58695	2	37	18	6532
Cluster_Peak4	Cluster_Harbison_STE12_BUT90	0.00480455	3.81962	3	37	61	6532
Cluster_Peak4	Cluster_YeasTractDirect_THI2	0.0050293	3.9983	3	37	62	6532
Cluster_Peak4	Cluster_Venters25-37C_Ahc1	0.00549399	4.36772	13	37	1101	6532
Cluster_Peak4	Cluster_MacIsaac_HAP5	0.00556325	4.42279	2	37	20	6532
Cluster_Peak4	Cluster_YeasTractDirect_ARR1	0.00612702	4.87098	2	37	21	6532
Cluster_Peak4	Cluster_MacIsaac_DIG1	0.00984574	7.82737	3	37	79	6532
Cluster_Peak5	Cluster_MacIsaac_MET32	5.93e-09	4.72e-06	5	28	17	6532
Cluster_Peak5	Cluster_YeasTractDirect_MET4	8.8e-08	7e-05	6	28	55	6532
Cluster_Peak5	Cluster_Harbison_MET32_SM	1.1e-07	8.74e-05	5	28	29	6532
Cluster_Peak5	Cluster_MacIsaac_MET4	2.44e-06	0.00194087	3	28	7	6532
Cluster_Peak5	Cluster_Harbison_MET4_YPD	3.89e-06	0.00309647	3	28	8	6532
Cluster_Peak5	Cluster_MacIsaac_HAP4	1.02e-05	0.00806962	4	28	33	6532
Cluster_Peak5	Cluster_YeasTractDirect_MET32	1.8e-05	0.0143115	5	28	79	6532
Cluster_Peak5	Cluster_MacIsaac_CBF1	4.57e-05	0.0363692	6	28	159	6532
Cluster_Peak5	Cluster_Harbison_RGT1_YPD	0.000105764	0.0840826	2	28	4	6532
Cluster_Peak5	Cluster_Harbison_MET4_SM	0.000117981	0.0937948	3	28	23	6532
Cluster_Peak5	Cluster_YeasTractDirect_CBF1	0.00031968	0.254145	7	28	322	6532
Cluster_Peak5	Cluster_YeasTractDirect_MET31	0.000393406	0.312758	4	28	83	6532
Cluster_Peak5	Cluster_Harbison_MET32_YPD	0.000458231	0.364294	3	28	36	6532
Cluster_Peak5	Cluster_YeasTractDirect_HAP3	0.000459122	0.365002	5	28	156	6532
Cluster_Peak5	Cluster_MacIsaac_TYE7	0.000497235	0.395302	3	28	37	6532
Cluster_Peak5	Cluster_YeasTractDirect_HAP2	0.000561649	0.446511	5	28	163	6532
Cluster_Peak5	Cluster_Harbison_CBF1_SM	0.000610522	0.485365	5	28	166	6532
Cluster_Peak5	Cluster_Harbison_CBF1_YPD	0.000626215	0.497841	2	28	9	6532
Cluster_Peak5	Cluster_YeasTractDirect_HAP5	0.000627505	0.498866	5	28	167	6532
Cluster_Peak5	Cluster_Venters25-37C_TBP	0.000947077	0.752927	18	28	2212	6532
Cluster_Peak5	Cluster_YeasTractDirect_HAP4	0.00104798	0.833141	5	28	187	6532
Cluster_Peak5	Cluster_YeasTractDirect_MET28	0.00120839	0.960671	3	28	50	6532
Cluster_Peak5	Cluster_Venters25-37C_Fcp1	0.00165113	1.31265	9	28	688	6532
Cluster_Peak5	Cluster_Venters25-37C_Med4	0.00203695	1.61938	11	28	1016	6532
Cluster_Peak5	Cluster_Harbison_MET31_YPD	0.00204899	1.62895	2	28	16	6532
Cluster_Peak5	Cluster_Venters25-37C_Gcn4	0.00206252	1.63971	8	28	570	6532
Cluster_Peak5	Cluster_YeasTractDirect_GSM1	0.00259865	2.06593	2	28	18	6532
Cluster_Peak5	Cluster_MacIsaac_MET31	0.0028967	2.30287	2	28	19	6532
Cluster_Peak5	Cluster_YeasTractDirect_HAP1	0.00331078	2.63207	4	28	147	6532
Cluster_Peak5	Cluster_Venters25-37C_Tfa2	0.00469305	3.73098	13	28	1483	6532
Cluster_Peak5	Cluster_Venters25-37C_Swi3	0.00498867	3.96599	15	28	1880	6532
Cluster_Peak5	Cluster_Venters25-37C_Rgr1	0.00502762	3.99696	17	28	2297	6532
Cluster_Peak5	Cluster_MacIsaac_ROX1	0.00540438	4.29648	2	28	26	6532
Cluster_Peak5	Cluster_Venters25-37C_Irc20	0.00547123	4.34962	14	28	1699	6532
Cluster_Peak5	Cluster_YeasTractDirect_CIN5	0.00560947	4.45953	7	28	526	6532
Cluster_Peak5	Cluster_Venters25-37C_Gcr1	0.00596937	4.74565	7	28	532	6532
Cluster_Peak5	Cluster_Harbison_NRG1_H2O2Hi	0.00626221	4.97846	3	28	89	6532
Cluster_Peak5	Cluster_Venters25-37C_Bur6	0.00699555	5.56146	18	28	2584	6532
Cluster_Peak5	Cluster_MacIsaac_RGT1	0.00855548	6.80161	1	28	2	6532
Cluster_Peak5	Cluster_Venters25-37C_Rad3	0.0091979	7.31233	20	28	3110	6532
Cluster_Peak5	Cluster_Harbison_ROX1_H2O2Hi	0.00966173	7.68108	2	28	35	6532
Cluster_Peak6	Cluster_ScherrerRBP_STI1	6.1e-19	4.85e-16	14	32	86	6532
Cluster_Peak6	Cluster_YeasTractDirect_SWI5	2.26e-18	1.8e-15	17	32	195	6532
Cluster_Peak6	Cluster_YeasTractDirect_GAT3	2.92e-16	2.32e-13	14	32	131	6532
Cluster_Peak6	Cluster_YeasTractDirect_GAL4	3.25e-15	2.58e-12	13	32	119	6532
Cluster_Peak6	Cluster_YeasTractDirect_HAP4	4.59e-14	3.65e-11	14	32	187	6532
Cluster_Peak6	Cluster_YeasTractDirect_SMP1	8.25e-14	6.56e-11	14	32	195	6532
Cluster_Peak6	Cluster_YeasTractDirect_RGM1	2.96e-13	2.35e-10	10	32	66	6532
Cluster_Peak6	Cluster_YeasTractDirect_GZF3	3.65e-12	2.9e-09	9	32	57	6532
Cluster_Peak6	Cluster_YeasTractDirect_PDR1	1.18e-11	9.38e-09	15	32	343	6532
Cluster_Peak6	Cluster_YeasTractDirect_YAP5	4.13e-11	3.29e-08	16	32	449	6532
Cluster_Peak6	Cluster_YeasTractDirect_MSN4	4.33e-11	3.44e-08	13	32	247	6532
Cluster_Peak6	Cluster_YeasTractDirect_MBP1	1.2e-10	9.56e-08	14	32	332	6532
Cluster_Peak6	Cluster_YeasTractDirect_SWI4	3.18e-10	2.53e-07	15	32	432	6532
Cluster_Peak6	Cluster_YeasTractDirect_UGA3	1.77e-08	1.4e-05	8	32	100	6532
Cluster_Peak6	Cluster_ScherrerRBP_MAP1	2.97e-08	2.36e-05	9	32	153	6532
Cluster_Peak6	Cluster_Venters25-37C_Yaf9	1.03e-07	8.18e-05	11	32	305	6532
Cluster_Peak6	Cluster_YeasTractDirect_ZAP1	8.86e-07	0.000704746	6	32	70	6532
Cluster_Peak6	Cluster_Harbison_YAP5_YPD	9.12e-07	0.000724651	5	32	38	6532
Cluster_Peak6	Cluster_ScherrerRBP_MDH3	2.17e-06	0.00172168	5	32	45	6532
Cluster_Peak6	Cluster_Harbison_GAT3_YPD	3.26e-06	0.00259394	4	32	22	6532
Cluster_Peak6	Cluster_YeasTractDirect_HAP1	5.32e-06	0.00423105	7	32	147	6532
Cluster_Peak6	Cluster_YeasTractDirect_SOK2	5.36e-06	0.00426207	14	32	769	6532
Cluster_Peak6	Cluster_YeasTractDirect_DAL80	6.52e-06	0.0051819	5	32	56	6532
Cluster_Peak6	Cluster_YeasTractDirect_TOS8	9.61e-06	0.00763958	8	32	227	6532
Cluster_Peak6	Cluster_YeasTractDirect_ROX1	1.68e-05	0.0133463	7	32	175	6532
Cluster_Peak6	Cluster_Harbison_DAT1_YPD	2.28e-05	0.018132	3	32	12	6532
Cluster_Peak6	Cluster_YeasTractDirect_RAP1	0.000113155	0.089958	16	32	1286	6532
Cluster_Peak6	Cluster_YeasTractDirect_RLM1	0.000188588	0.149927	5	32	112	6532
Cluster_Peak6	Cluster_Harbison_MSN4_YPD	0.000357958	0.284577	3	32	29	6532
Cluster_Peak6	Cluster_YeasTractDirect_HCM1	0.000683315	0.543236	6	32	226	6532
Cluster_Peak6	Cluster_YeasTractDirect_YOX1	0.000903014	0.717896	7	32	331	6532
Cluster_Peak6	Cluster_Harbison_PDR1_YPD	0.00179062	1.42354	3	32	50	6532
Cluster_Peak6	Cluster_YeasTractDirect_XBP1	0.00234548	1.86466	7	32	390	6532
Cluster_Peak6	Cluster_Harbison_SWI5_YPD	0.00526487	4.18557	3	32	73	6532
Cluster_Peak6	Cluster_YeasTractDirect_YAP6	0.00598575	4.75868	8	32	585	6532
Cluster_Peak6	Cluster_Harbison_MAL33_H2O2Hi	0.00600027	4.77021	2	32	24	6532
Cluster_Peak6	Cluster_YeasTractDirect_HAP3	0.00668685	5.31604	4	32	156	6532
Cluster_Peak6	Cluster_YeasTractDirect_PHD1	0.00758979	6.03389	7	32	482	6532
Cluster_Peak6	Cluster_YeasTractDirect_HAP2	0.00779471	6.19679	4	32	163	6532
Cluster_Peak6	Cluster_YeasTractDirect_HAP5	0.00847933	6.74107	4	32	167	6532
Cluster_Peak7	Cluster_YeasTractDirect_SOK2	2.34e-07	0.000186215	27	81	769	6532
Cluster_Peak7	Cluster_YeasTractDirect_STE12	4.98e-07	0.00039601	45	81	1900	6532
Cluster_Peak7	Cluster_Venters25-37C_Ume6	8.57e-06	0.00681441	35	81	1405	6532
Cluster_Peak7	Cluster_YeasTractDirect_TEC1	1.41e-05	0.0111953	18	81	474	6532
Cluster_Peak7	Cluster_Venters25-37C_Spt7	1.65e-05	0.0131484	27	81	955	6532
Cluster_Peak7	Cluster_TsvetanovaRBP_PAD1	3.49e-05	0.0277724	7	81	75	6532
Cluster_Peak7	Cluster_Venters25-37C_Bur6	4.12e-05	0.0327705	50	81	2584	6532
Cluster_Peak7	Cluster_YeasTractDirect_SKO1	8.66e-05	0.0688582	18	81	543	6532
Cluster_Peak7	Cluster_Venters25-37C_Snf2	0.000108436	0.0862066	14	81	358	6532
Cluster_Peak7	Cluster_Venters25-37C_Ncb2	0.000144432	0.114823	36	81	1662	6532
Cluster_Peak7	Cluster_Venters25-37C_Cyc8	0.000162073	0.128848	41	81	2023	6532
Cluster_Peak7	Cluster_YeasTractDirect_MSN2	0.000173548	0.137971	12	81	284	6532
Cluster_Peak7	Cluster_YeasTractDirect_YAP6	0.000224079	0.178143	18	81	585	6532
Cluster_Peak7	Cluster_Venters25-37C_Nhp6a	0.000301825	0.239951	36	81	1720	6532
Cluster_Peak7	Cluster_YeasTractDirect_STB5	0.000329176	0.261695	8	81	141	6532
Cluster_Peak7	Cluster_Harbison_PHD1_YPD	0.000389066	0.309308	5	81	51	6532
Cluster_Peak7	Cluster_MacIsaac_OPI1	0.000452021	0.359357	2	81	3	6532
Cluster_Peak7	Cluster_Venters25-37C_Spt23	0.000538299	0.427948	32	81	1493	6532
Cluster_Peak7	Cluster_YeasTractDirect_SKN7	0.000659202	0.524066	16	81	530	6532
Cluster_Peak7	Cluster_YeasTractDirect_PHD1	0.000728001	0.578761	15	81	482	6532
Cluster_Peak7	Cluster_Venters25-37C_Hfi1	0.00111011	0.882535	27	81	1219	6532
Cluster_Peak7	Cluster_YeasTractDirect_STP1	0.0011262	0.895333	7	81	131	6532
Cluster_Peak7	Cluster_Venters25-37C_Fkh2	0.00146405	1.16392	18	81	684	6532
Cluster_Peak7	Cluster_YeasTractDirect_IME1	0.00148255	1.17862	2	81	5	6532
Cluster_Peak7	Cluster_Venters25-37C_Isw2	0.00150129	1.19353	31	81	1511	6532
Cluster_Peak7	Cluster_MacIsaac_NRG1	0.00177764	1.41322	5	81	71	6532
Cluster_Peak7	Cluster_MacIsaac_PHD1	0.00189197	1.50412	5	81	72	6532
Cluster_Peak7	Cluster_YeasTractDirect_SWI4	0.00231513	1.84053	13	81	432	6532
Cluster_Peak7	Cluster_Venters25-37C_Mot1	0.00250971	1.99522	10	81	284	6532
Cluster_Peak7	Cluster_Venters25-37C_Ada2	0.00251347	1.99821	15	81	545	6532
Cluster_Peak7	Cluster_YeasTractDirect_MSN1	0.00254607	2.02413	5	81	77	6532
Cluster_Peak7	Cluster_YeasTractDirect_NRG1	0.00264938	2.10626	9	81	239	6532
Cluster_Peak7	Cluster_Venters25-37C_Tup1	0.00293773	2.3355	12	81	391	6532
Cluster_Peak7	Cluster_Harbison_PHD1_BUT90	0.00300972	2.39273	5	81	80	6532
Cluster_Peak7	Cluster_Harbison_IME1_H2O2Hi	0.00306348	2.43547	2	81	7	6532
Cluster_Peak7	Cluster_Venters25-37C_Dig1	0.0031284	2.48708	12	81	394	6532
Cluster_Peak7	Cluster_Harbison_YAP1_YPD	0.00378207	3.00674	4	81	52	6532
Cluster_Peak7	Cluster_Venters25-37C_Ino2	0.00467615	3.71754	25	81	1207	6532
Cluster_Peak7	Cluster_Venters25-37C_Eaf3	0.00476452	3.78779	12	81	415	6532
Cluster_Peak7	Cluster_Harbison_NRG1_H2O2Hi	0.00476592	3.7889	5	81	89	6532
Cluster_Peak7	Cluster_Venters25-37C_Tfa2	0.00489185	3.88902	29	81	1483	6532
Cluster_Peak7	Cluster_Venters25-37C_Tfc6	0.00534055	4.24574	25	81	1219	6532
Cluster_Peak7	Cluster_Venters25-37C_Ino4	0.00553144	4.39749	28	81	1426	6532
Cluster_Peak7	Cluster_Venters25-37C_Itc1	0.00562832	4.47451	39	81	2221	6532
Cluster_Peak7	Cluster_Venters25-37C_Ssl1	0.00579989	4.61091	55	81	3497	6532
Cluster_Peak7	Cluster_YeasTractDirect_RGT1	0.00595589	4.73494	4	81	59	6532
Cluster_Peak7	Cluster_Harbison_YAP6_H2O2Hi	0.00595589	4.73494	4	81	59	6532
Cluster_Peak7	Cluster_Venters25-37C_Rsc2	0.00621757	4.94296	23	81	1100	6532
Cluster_Peak7	Cluster_Venters25-37C_Fkh1	0.00648297	5.15396	36	81	2014	6532
Cluster_Peak7	Cluster_Venters25-37C_Tfg1	0.00662905	5.27009	49	81	3020	6532
Cluster_Peak7	Cluster_MacIsaac_SWI6	0.00746111	5.93159	5	81	99	6532
Cluster_Peak7	Cluster_Venters25-37C_Bre2	0.00774209	6.15496	20	81	924	6532
Cluster_Peak7	Cluster_Venters25-37C_Tfg2	0.00777418	6.18047	27	81	1391	6532
Cluster_Peak7	Cluster_Venters25-37C_Ino80	0.00805153	6.40097	44	81	2648	6532
Cluster_Peak7	Cluster_Venters25-37C_Snf7	0.00826404	6.56991	11	81	390	6532
Cluster_Peak7	Cluster_Venters25-37C_Taf10	0.00876457	6.96783	25	81	1266	6532
Cluster_Peak7	Cluster_Venters25-37C_Yap1	0.00888797	7.06594	10	81	340	6532
Cluster_Peak7	Cluster_Venters25-37C_Hho1	0.00911802	7.24883	12	81	451	6532
Cluster_Peak7	Cluster_YeasTractDirect_MIG1	0.00914476	7.27008	5	81	104	6532
Cluster_Peak8	Cluster_YeasTractDirect_SOK2	5.62e-15	4.46e-12	81	286	769	6532
Cluster_Peak8	Cluster_YeasTractDirect_SKO1	5.89e-13	4.68e-10	62	286	543	6532
Cluster_Peak8	Cluster_YeasTractDirect_FLO8	5.59e-12	4.45e-09	35	286	213	6532
Cluster_Peak8	Cluster_YeasTractDirect_SKN7	7.27e-12	5.78e-09	59	286	530	6532
Cluster_Peak8	Cluster_Venters25-37C_Tup1	3.58e-10	2.85e-07	46	286	391	6532
Cluster_Peak8	Cluster_YeasTractDirect_STE12	1.46e-09	1.16e-06	130	286	1900	6532
Cluster_Peak8	Cluster_Venters25-37C_Nhp6a	1.52e-09	1.21e-06	121	286	1720	6532
Cluster_Peak8	Cluster_MacIsaac_SKN7	2.7e-09	2.15e-06	21	286	104	6532
Cluster_Peak8	Cluster_MacIsaac_SUT1	2.73e-08	2.17e-05	14	286	52	6532
Cluster_Peak8	Cluster_YeasTractDirect_PHD1	3.76e-08	2.99e-05	48	286	482	6532
Cluster_Peak8	Cluster_YeasTractDirect_MGA1	1.61e-07	0.000128333	25	286	177	6532
Cluster_Peak8	Cluster_Venters25-37C_Bur6	2.18e-07	0.000173564	155	286	2584	6532
Cluster_Peak8	Cluster_YeasTractDirect_FHL1	2.57e-07	0.000204608	63	286	762	6532
Cluster_Peak8	Cluster_Harbison_YAP6_YPD	2.88e-07	0.00022906	15	286	71	6532
Cluster_Peak8	Cluster_YeasTractDirect_YAP6	3.95e-07	0.000313641	52	286	585	6532
Cluster_Peak8	Cluster_Venters25-37C_Cyc8	1.31e-06	0.00104188	126	286	2023	6532
Cluster_Peak8	Cluster_Harbison_SKN7_H2O2Lo	1.32e-06	0.00104964	19	286	123	6532
Cluster_Peak8	Cluster_YeasTractDirect_TEC1	2.77e-06	0.0022025	43	286	474	6532
Cluster_Peak8	Cluster_Venters25-37C_Fkh1	3.35e-06	0.00266266	124	286	2014	6532
Cluster_Peak8	Cluster_Harbison_SKN7_H2O2Hi	3.5e-06	0.00278078	13	286	65	6532
Cluster_Peak8	Cluster_Venters25-37C_Fkh2	4.27e-06	0.00339499	55	286	684	6532
Cluster_Peak8	Cluster_YeasTractDirect_MSN2	5.39e-06	0.0042855	30	286	284	6532
Cluster_Peak8	Cluster_Harbison_NRG1_H2O2Hi	5.89e-06	0.00468082	15	286	89	6532
Cluster_Peak8	Cluster_Venters25-37C_Ume6	6.56e-06	0.00521406	93	286	1405	6532
Cluster_Peak8	Cluster_Harbison_SOK2_BUT14	8.36e-06	0.00664584	12	286	60	6532
Cluster_Peak8	Cluster_MacIsaac_NRG1	9.77e-06	0.00776581	13	286	71	6532
Cluster_Peak8	Cluster_YeasTractDirect_STB5	1.05e-05	0.0083572	19	286	141	6532
Cluster_Peak8	Cluster_MacIsaac_PHD1	1.15e-05	0.00911054	13	286	72	6532
Cluster_Peak8	Cluster_YeasTractDirect_NRG1	1.4e-05	0.0111265	26	286	239	6532
Cluster_Peak8	Cluster_Harbison_CIN5_YPD	1.42e-05	0.011262	17	286	119	6532
Cluster_Peak8	Cluster_Venters25-37C_Dig1	1.68e-05	0.013365	36	286	394	6532
Cluster_Peak8	Cluster_YeasTractDirect_CIN5	1.73e-05	0.0137834	44	286	526	6532
Cluster_Peak8	Cluster_Venters25-37C_Fhl1	3.17e-05	0.0251849	61	286	841	6532
Cluster_Peak8	Cluster_Venters25-37C_Ncb2	3.27e-05	0.0260194	103	286	1662	6532
Cluster_Peak8	Cluster_Harbison_PHD1_BUT90	3.72e-05	0.0295432	13	286	80	6532
Cluster_Peak8	Cluster_Venters25-37C_Hda1	3.84e-05	0.0305262	103	286	1668	6532
Cluster_Peak8	Cluster_YeasTractDirect_SWI4	5.3e-05	0.0421281	37	286	432	6532
Cluster_Peak8	Cluster_Harbison_PHD1_YPD	5.73e-05	0.0455544	10	286	51	6532
Cluster_Peak8	Cluster_MacIsaac_ROX1	9.19e-05	0.0730773	7	286	26	6532
Cluster_Peak8	Cluster_MacIsaac_SOK2	9.56e-05	0.0759822	9	286	44	6532
Cluster_Peak8	Cluster_MacIsaac_YAP6	9.56e-05	0.0759822	9	286	44	6532
Cluster_Peak8	Cluster_Venters25-37C_Taf3	0.000110741	0.0880395	85	286	1343	6532
Cluster_Peak8	Cluster_YeasTractDirect_HOT1	0.000116796	0.0928524	11	286	66	6532
Cluster_Peak8	Cluster_MacIsaac_SKO1	0.000149647	0.118969	5	286	13	6532
Cluster_Peak8	Cluster_Venters25-37C_Rtt103	0.000195714	0.155593	88	286	1425	6532
Cluster_Peak8	Cluster_Venters25-37C_Top1	0.000212839	0.169207	46	286	620	6532
Cluster_Peak8	Cluster_Venters25-37C_Caf130	0.000317839	0.252682	52	286	741	6532
Cluster_Peak8	Cluster_Venters25-37C_Spt7	0.000379913	0.302031	63	286	955	6532
Cluster_Peak8	Cluster_YeasTractDirect_AZF1	0.000465587	0.370141	8	286	43	6532
Cluster_Peak8	Cluster_Venters25-37C_Ino4	0.000544616	0.432969	86	286	1426	6532
Cluster_Peak8	Cluster_Venters25-37C_Dhh1	0.000556004	0.442023	25	286	282	6532
Cluster_Peak8	Cluster_Harbison_SUT1_YPD	0.000561506	0.446397	9	286	55	6532
Cluster_Peak8	Cluster_Venters25-37C_Isw2	0.000584235	0.464466	90	286	1511	6532
Cluster_Peak8	Cluster_Venters25-37C_Ada2	0.000715459	0.56879	40	286	545	6532
Cluster_Peak8	Cluster_Venters25-37C_Pcf11	0.000942964	0.749657	65	286	1027	6532
Cluster_Peak8	Cluster_Venters25-37C_Irc20	0.000943625	0.750182	98	286	1699	6532
Cluster_Peak8	Cluster_Venters25-37C_Nut1	0.000968896	0.770272	112	286	1997	6532
Cluster_Peak8	Cluster_Venters25-37C_Spt3	0.00103671	0.824183	111	286	1979	6532
Cluster_Peak8	Cluster_YeasTractDirect_CUP9	0.00118902	0.94527	10	286	73	6532
Cluster_Peak8	Cluster_Harbison_NRG1_YPD	0.00132137	1.05049	8	286	50	6532
Cluster_Peak8	Cluster_Harbison_FHL1_SM	0.00133798	1.06369	14	286	128	6532
Cluster_Peak8	Cluster_Harbison_FHL1_YPD	0.00134518	1.06942	13	286	114	6532
Cluster_Peak8	Cluster_Harbison_SKO1_YPD	0.00134756	1.07131	4	286	12	6532
Cluster_Peak8	Cluster_Venters25-37C_Rgr1	0.00138783	1.10332	125	286	2297	6532
Cluster_Peak8	Cluster_MacIsaac_SWI4	0.00147928	1.17603	11	286	88	6532
Cluster_Peak8	Cluster_Venters25-37C_Ioc3	0.00163549	1.30021	81	286	1372	6532
Cluster_Peak8	Cluster_Venters25-37C_Med2	0.00178503	1.4191	41	286	590	6532
Cluster_Peak8	Cluster_Venters25-37C_Kin28	0.00187576	1.49123	76	286	1276	6532
Cluster_Peak8	Cluster_Harbison_SWI4_YPD	0.00200446	1.59354	12	286	105	6532
Cluster_Peak8	Cluster_Venters25-37C_Rsc1	0.00209513	1.66563	76	286	1281	6532
Cluster_Peak8	Cluster_Harbison_FHL1_RAPA	0.00231694	1.84197	13	286	121	6532
Cluster_Peak8	Cluster_Venters25-37C_Ino2	0.00246747	1.96164	72	286	1207	6532
Cluster_Peak8	Cluster_YeasTractDirect_IXR1	0.00254864	2.02617	12	286	108	6532
Cluster_Peak8	Cluster_Venters25-37C_Swi4	0.00255914	2.03452	14	286	137	6532
Cluster_Peak8	Cluster_YeasTractDirect_SWI6	0.00268648	2.13575	16	286	168	6532
Cluster_Peak8	Cluster_Harbison_GCN4_SM	0.0030927	2.4587	13	286	125	6532
Cluster_Peak8	Cluster_Venters25-37C_Ssl1	0.00319296	2.5384	176	286	3497	6532
Cluster_Peak8	Cluster_Venters25-37C_Gcn5	0.00373905	2.97254	98	286	1769	6532
Cluster_Peak8	Cluster_YeasTractDirect_INO4	0.00379026	3.01326	39	286	577	6532
Cluster_Peak8	Cluster_MacIsaac_SWI6	0.0038064	3.02609	11	286	99	6532
Cluster_Peak8	Cluster_YeasTractDirect_CAD1	0.00424814	3.37727	18	286	208	6532
Cluster_Peak8	Cluster_Venters25-37C_Rtg2	0.0045176	3.59149	17	286	193	6532
Cluster_Peak8	Cluster_Venters25-37C_Skn7	0.00457944	3.64065	46	286	717	6532
Cluster_Peak8	Cluster_YeasTractDirect_IFH1	0.00467519	3.71677	20	286	243	6532
Cluster_Peak8	Cluster_Venters25-37C_Srb5	0.00468219	3.72234	106	286	1953	6532
Cluster_Peak8	Cluster_Harbison_SWI6_YPD	0.00479148	3.80922	11	286	102	6532
Cluster_Peak8	Cluster_Harbison_AZF1_YPD	0.00544819	4.33131	4	286	17	6532
Cluster_Peak8	Cluster_Venters25-37C_Taf10	0.0055515	4.41344	73	286	1266	6532
Cluster_Peak8	Cluster_YeasTractDirect_HMS2	0.00565271	4.4939	6	286	38	6532
Cluster_Peak8	Cluster_Venters25-37C_Ess1	0.00583162	4.63613	37	286	554	6532
Cluster_Peak8	Cluster_Venters25-37C_Chz1	0.0060288	4.79289	29	286	407	6532
Cluster_Peak8	Cluster_Venters25-37C_Dot1	0.00619037	4.92134	58	286	966	6532
Cluster_Peak8	Cluster_Venters25-37C_Sua7	0.00637805	5.07055	172	286	3449	6532
Cluster_Peak8	Cluster_Venters25-37C_Rad3	0.00693854	5.51614	157	286	3110	6532
Cluster_Peak8	Cluster_Venters25-37C_Yap6	0.00702009	5.58098	66	286	1134	6532
Cluster_Peak8	Cluster_YeasTractDirect_GCN4	0.00712917	5.66769	22	286	287	6532
Cluster_Peak8	Cluster_Venters25-37C_Snf2	0.00720293	5.72633	26	286	358	6532
Cluster_Peak8	Cluster_Venters25-37C_Hfi1	0.00743745	5.91277	70	286	1219	6532
Cluster_Peak8	Cluster_Venters25-37C_Xbp1	0.00787129	6.25768	85	286	1535	6532
Cluster_Peak8	Cluster_Venters25-37C_Spt23	0.00789185	6.27402	83	286	1493	6532
Cluster_Peak8	Cluster_MacIsaac_LEU3	0.00792426	6.29979	3	286	10	6532
Cluster_Peak8	Cluster_Harbison_GCN4_RAPA	0.00842541	6.6982	11	286	110	6532
Cluster_Peak8	Cluster_Venters25-37C_Reb1	0.00906234	7.20456	103	286	1928	6532
Cluster_Peak8	Cluster_Venters25-37C_Gcr1	0.00915674	7.27961	35	286	532	6532
Cluster_Peak8	Cluster_YeasTractDirect_ROX1	0.00949553	7.54895	15	286	175	6532
Cluster_Peak8	Cluster_Venters25-37C_Dst1	0.0098695	7.84625	53	286	887	6532
Cluster_Peak9	Cluster_TsvetanovaRBP_LYS1	4.21e-05	0.0334335	43	125	1260	6532
Cluster_Peak9	Cluster_Venters25-37C_Rpb3	0.000280907	0.223321	43	125	1364	6532
Cluster_Peak9	Cluster_TsvetanovaRBP_GIS2	0.00045139	0.358855	10	125	146	6532
Cluster_Peak9	Cluster_Harbison_RCS1_YPD	0.00100939	0.802462	4	125	24	6532
Cluster_Peak9	Cluster_Venters25-37C_Rpb7	0.00213172	1.69471	54	125	2013	6532
Cluster_Peak9	Cluster_Venters25-37C_Rpb2	0.00459854	3.65584	44	125	1603	6532
Cluster_Peak9	Cluster_YeasTractDirect_ECM22	0.00499424	3.97042	8	125	139	6532
