# Supplementary material for: Genetic Architecture of Ethanol-Responsive Transcriptome Variation in Saccharomyces cerevisiae Strains
Source: Oxford University Press journal article supplement (doi:10.1534/genetics.114.167429), 2014-06-26
Supplement: genetics.114.167429-4.xls [file genetics.114.167429-4.xls]

## Sheet: Hotspot Peak Locations
Peak	2D Coordinates (nt)
1	chr3 285449
2	chr10 84692
3	chr1 61542
4	chr5 321650
5	chr5 121630
6	chr5 275934
7	chr13 170874
8	chr15 476069
9	chr5 301635
10	chr10 674666
11	chr7 767256
12	chr4 299339
13	chr14 112347
14	chr7 65906
15	chr7 905097
16	chr11 304207
17	chr14 467312
18	chr4 110699
19	chr4: 33360
20	chr8: 519869
21	chr12 900010
22	chr13: 181189
23	chr12: 650065
24	chr9: 405960

## Sheet: Epi_Hotspot_Traits
Cluster_Epi-Peak1
YOR110W
YKR075C
YML046W
YCR083W
YIR019C
YOR371C
YDL077C
YCR072C
YPR029C
YCR093W
YMR309C
YBL024W
YDR395W
YKL014C
YLR061W
YNL247W
YPR089W
YMR185W
YHL006C
YMR125W
YIR041W
YOR098C
YNR038W
YDL112W
YJL109C
YNL119W
YDR165W
YJR041C
YMR229C
YHL015W
YBL039C
YBL004W
YNL132W
YKL205W
YCR104W
YJL010C
YJL145W
YDR429C
YCR081W
YDR286C
YBL036C
YDR023W
YMR325W
YGR185C
YMR260C
YHR010W
YBR121C
YNL096C
Q0120
YOR394W
YPR169W
YOR021C
Cluster_Epi-Peak2
YCL026C-A
YLR255C
YJL178C
YLR185W
YOR167C
YDL061C
YLR388W
YKL006W
YCR031C
YDL130W
YDR064W
YHR021C
Cluster_Epi-Peak3
YDR435C
YLR288C
YDR524C-A
YNL267W
YAL062W
YAL061W
YJL004C
Q0105
Q0250
YBL068W
YKL121W
YKL103C
YMR209C
YCR061W
YHR016C
YKL151C
YOR173W
YDL223C
YLR258W
YIL156W-B
YIL136W
YBR033W
YMR102C
YBR169C
YGR008C
YCL040W
YBR126C
YML100W
YIL101C
YDL169C
YML128C
YLL054C
YFL014W
YNL055C
YKL125W
YPR160W
YNL160W
YFR053C
YMR196W
YDR074W
YDR427W
YAL062W
Q0105
YKL104C
YAL061W
YDL235C
YPL010W
YGR180C
YHR032W
YJL210W
YCR061W
YJL008C
YLR219W
YLL054C
YMR174C
YCL048W-A
YBR117C
YNL055C
YNL160W
YMR169C
YBR300C
YGR043C
Cluster_Epi-Peak4
YIL158W
YMR042W
YOL117W
YIL105C
YML113W
YJL208C
YMR075W
YJL025W
YLR238W
YHR149C
YHR006W
YER079W
YOR244W
YJL198W
YBR054W
YLR082C
YLL012W
YDL025C
YLR300W
YDR306C
YHR104W
YOR278W
YDL049C
YHR139C
YJL067W
YML003W
YMR242C
YCR072C
YGR214W
YCR057C
YOR312C
YKR059W
YPL037C
YOR341W
YDR418W
YNL123W
YMR142C
YML024W
YER117W
YBL092W
YIL052C
YGR085C
YDR450W
YML073C
YNL209W
YLL045C
YLR061W
YLR249W
YML063W
YGR034W
YPR102C
YOR026W
YGR123C
YNL302C
YDL082W
YGL076C
YJL177W
YPL198W
YOR335C
YLR205C
YOL121C
YBR181C
YPR149W
YGR249W
YER107C
YNL194C
Cluster_Epi-Peak5
YBL042C
YEL040W
YLR420W
YMR241W
YLR350W
YNR056C
YKL216W
YDR242W
YEL021W
YHR072W
YKR092C
YEL011W
YEL019C
YDR101C
YIR012W
YOL052C-A
YDR171W
YLR177W
YBR092C
YMR250W
YPR160W
YFR015C
YML128C
YIR016W
YNL025C
YMR104C
YKL074C
YPR160W-A
YLL019C
YOR236W
YLR258W
YGL096W
YLR178C
YNL049C
YCR091W
YLR149C
YFR017C
YKL171W
YER054C
YDR479C
YDR144C
YMR138W
YGL121C
YHR085W
YDR070C
YPR184W
YOL126C
YNL194C
YKL062W
YPL230W
YIL136W
YDR277C
YPL186C
YLL033W
YDL131W
YBR105C
YPR137W
YDR436W
YDR540C
YLR103C
YNL067W
YLR067C
YCL065W
YLR318W
YPL021W
YJR097W
YGR283C
YBR257W
YEL020C
YPR026W
YOR374W
YIL155C
YKR067W
YJL132W
YBR285W
YNL200C
YEL008W
YDL085W
YMR103C
YHR092C
YBR155W
YJR154W
YFL013W-A
YEL073C
YDR108W
YLR376C
YGR126W
YKL024C
YDR089W
YBR171W
YJL142C
YGR052W
YOL031C
YGR143W
YER088C
YBR002C
YMR171C
YGL036W
YMR291W
YJL074C
YBL057C
YNL161W
YER015W
YFR029W
YEL059C-A
YER013W
YDR185C
YGR031W
YDR111C
YLR095C
YBL008W
YCL041C
YBR162W-A
YOR008W-B
YCL068C
YOR134W
YOL155C
YIR020C
Cluster_Epi-Peak6
YNR055C
YGL210W
YHR194W
YDR309C
YIL114C
YMR303C
YIL142W
YJL011C
YPR186C
YER131W
YBL027W
YPR187W
YBR084C-A
YBR181C
YDR527W
YPL090C
YNL067W
YDR447C
YOL121C
YOL139C
YML063W
Cluster_Epi-Peak7
YPR138C
YHR011W
YOR324C
YPL008W
YOR023C
YOL145C
YDL012C
YAL019W
YAL029C
YCR002C
YNL257C
YOR070C
YJL006C
YLR294C
YHR021C
YOR326W
YOL111C
YPL159C
YNL271C
YGL203C
YHR158C
YBR277C
Cluster_Epi-Peak8
YMR287C
YJL063C
YHR059W
YDR462W
YMR225C
YGL219C
YNR037C
YDR175C
YNL073W
YGR132C
YLR439W
YHR116W
YGL068W
YNR036C
YGR021W
YDR493W
YLR069C
YKL053C-A
YGR112W
YBL080C
YNR061C
YML009C
YNL083W
YDR375C
YMR024W
YJL096W
YDR116C
YNL284C
YKL085W
YKL170W
YKL087C
YPL040C
YOL053W
YJR034W
YNR001C
YKL003C
YGR193C
YOR050C
YMR287C
YDL202W
YIR017W-A
Cluster_Epi-Peak9
YER049W
YHR205W
YBR285W
YBR125C
YDR101C
YER118C
YOR341W
YGR214W
YER121W
YNL009W
YJL069C
YGR158C
YLR151C
YHR020W
YMR217W
YKL181W
YGL139W
YGL169W
YJL183W
YGL030W
YPL220W
YDR025W
YGL081W
YDR064W
YKL125W
YIL030C
YNL219C
YML031W
YPR008W
YHR022C
YFL051C
YER048W-A
YLR328W
YMR318C
YMR242C
YOR260W
YBR121C-A
YGR118W
YMR230W
YGL147C
YML026C
YOR312C
YNL178W
YMR143W
YBR191W
YDL082W
YHL033C
YKR094C
YLR293C
YGL076C
YDR450W
YJR123W
YKL180W
YML024W
YGR027C
YER074W
YLR075W
YPL273W
YGR264C
YER090W
YBR230C
Cluster_Epi-Peak10
YNR064C
YJR156C
YNL332W
YFL058W
YDR242W
YJR113C
YDR197W
YJL099W
YJR034W
YOR150W
YLR439W
YJR101W
YBR185C
YMR024W
YDR375C
YNL252C
YIR006C
YJL102W
YER066C-A
YGR260W
YPL040C
YJR094C
YBL106C
YJR108W
YGL088W
YPR129W
YOR153W
YJL112W
YMR188C
YDR462W
YIL098C
YLR312W-A
YPR133C
YOR174W
YGR021W
YLR257W
YOR348C
YJR149W
YPR022C
YPL228W
YDR383C
YKL122C
YER112W
YOR265W
YKR083C
YGL061C
YLR151C
YLR147C
YBR278W
YKR035W-A
Cluster_Epi-Peak11
YOR369C
YLL045C
YPL079W
YPR043W
YLR167W
YNL162W
YER056C-A
YHL015W
YDR500C
YIL133C
YLR344W
YKR094C
YKR057W
YGL147C
YOL102C
YBR145W
YGR067C
Cluster_Epi-Peak12
YOR187W
YDL067C
YKL016C
YDR529C
YJR077C
YNL052W
YJR121W
YBL045C
YLR395C
YML120C
YGL187C
YKL148C
YBL099W
YGR183C
YBL030C
YGR055W
YDR298C
YDR213W
YPL068C
YML081C-A
YPL271W
YMR145C
YKL132C
YDR216W
Cluster_Epi-Peak13
YLR165C
YLR157W-E
YLR157W-D
YLR156W
YLR160C
YLR158C
YLR161W
YLR159W
YLR155C
YLR157C
Cluster_Epi-Peak14
YIL157C
YLR063W
YBL014C
YKR063C
YIL155C
YDR398W
YNL182C
YPL030W
YHR170W
YLR356W
YKL125W
YDL167C
YDR465C
YJL069C
YLR196W
YAR008W
YOL010W
YKR099W
YKL106W
YJL068C
YOR341W
YKR079C
Cluster_Epi-Peak15
YBL101C
YJR033C
YOL124C
YGR145W
YHR088W
YOR252W
YLL059C
YPR112C
YDL153C
YLR221C
YDR087C
YCR016W
YNL061W
YHR081W
YHR066W
YDR312W
YNL110C
YDL213C
YDL076C
YFR001W
YGL108C
Cluster_Epi-Peak16
YGR073C
YDR391C
YMR090W
YKL091C
YBR035C
YKL065W-A
YJL164C
YBL064C
YOR185C
YNL274C
YML004C
YPR021C
Cluster_Epi-Peak17
Q0060
YDR347W
YNL097W-A
YIL122W
YBR146W
YBR192W
YNL177C
YNL005C
YDR194C
YLR417W
YNL137C
YMR076C
YMR316W
YJL207C
YBR276C
YDR461C-A
YDL190C
YML011C
YDL216C
Q0085
YML103C
YGR032W
YDL210W
YBR289W
YBR056W-A
YNL085W
YBR005W
YBR097W
YOL016C
YKR024C
YNL070W
YMR263W
YJR021C
YHR034C
YGR071C
YNL117W
YLR194C
YLR451W
YER136W
YHR062C
YPL132W
YPL093W
YPL108W
YGR126W
YJL180C
YNR033W
YNL086W
YMR098C
YDR316W
YDR041W
YIL070C
YHR038W
YLR239C
YLR313C
YOR158W
YGR220C
YJL096W
YOR354C
YJL058C
YLR396C
YDR322W
YDR430C
YJL054W
YJR122W
YLL001W
YKR006C
YPR125W
Q0060
YER033C
YLR148W
YDL220C
YAL017W
YJL005W
YER103W
YDR207C
YEL059W
YBL096C
YLR099W-A
YLR414C
YOR385W
YPL232W
YJL057C
YHR209W
YGR111W
YPR026W
YHR122W
YML091C
YDL154W
YIR003W
YIL020C
YJR111C
YLR299W
YOR303W
Cluster_Epi-Peak18
YMR032W
YLR208W
YIL015W
YNL145W
YKL209C
YCL066W
YCL065W
YFL026W
YJR004C
YCR040W
YKL178C
YPR079W
YGR277C
YCR097W
YMR027W
YCR097W-A
YNL242W
YHL037C
YJR079W
YIL126W
YDR498C
YIL033C
Q0182
YFR032C-A
YLR293C
Cluster_Epi-Peak19
YCR097W
YNL146C-A
YIL015W
YNL145W
YKL209C
YPL187W
YJR004C
YGL089C
YGL032C
YCL066W
YJL170C
YCR097W-A
YFL026W
YCR040W
YKL178C
YLR040C
YCR018C
YCL065W
YFL027C
YCR097W
YCR041W
YDL159C-B
YML087C
YNL214W
YHR063C
Cluster_Epi-Peak20
YHR203C
YGL147C
YJR145C
YLR061W
YHR141C
YML073C
YDR418W
YOR312C
YJR123W
YJL189W
YGR027C
YBR118W
YNL162W
YDR450W
YER102W
YER074W
YJL190C
YKR094C
YLR075W
YIL074C
YKL180W
YPR102C
YGL030W
YML024W
YJL136C
YLR325C
YBL092W
YGR085C
YGL076C
YLR448W
YBL072C
YDL075W
YGL031C
YFR050C
Cluster_Epi-Peak21
YDL245C
YNL092W
YFR053C
YPR160W
YOR368W
YBL108W
YBR214W
YBR149W
YER140W
YDR171W
YGL037C
YHR087W
YLL008W
YMR250W
YLR327C
YKL091C
YOR364W
YGR136W
YHR213W-B
YOR374W
YOR294W
YDR210W
YDR436W
YBR234C
YGR205W
YPR026W
YHR198C
YOL006C
YOL126C
YLR297W
YEL052W
YKL093W
YOR323C
YEL011W
YDR018C
YNL160W
YJL185C
YDL079C
YBR132C
YLR407W
YKR058W
YMR206W
YNL200C
YDL194W
YGR143W
YDR138W
YLR251W
YMR081C
Cluster_Epi-Peak22
YJR035W
YNL265C
YLR170C
YLR361C
YOR303W
YKL018W
YNL291C
YNL329C
YFL025C
YOL157C
YML019W
YLR104W
YNL288W
YDR321W
YJL221C
YML030W
YPR062W
YHL021C
YGR020C
YPL071C
YCR030C
YHR003C
YDL188C
YLL060C
YHR086W
YCR025C
YNL187W
YKL010C
YJR154W
YHR121W
YDL092W
YAL016W
YML035C
YBR164C
YDR242W
YGR148C
YDL136W
YGR118W
YBR181C
YGR085C
YDL075W
YNL302C
YGL036W
YBL027W
YMR142C
YPR102C
YER131W
YIL052C
YDL191W
YLR167W
YHR160C
YKR067W
YNL162W
YPR043W
YPL029W
Cluster_Epi-Peak23
YDL089W
YPR007C
YKR069W
YLR092W
YJR137C
YHR109W
YFR030W
YMR134W
YJR010W
YPR167C
YBR242W
YER091C
YKL001C
YMR157C
YNL277W
YDL009C
Cluster_Epi-Peak24
YBL111C
YNL315C
YBL113C
YEL075C
YHR219W
YLL067C
YDR116C
YHR024C
YOR187W
YHL050C
YBL111C
YLL066C
YOR396W
YLR467W
YGR183C
YGR182C
YER190W
YBL045C

## Sheet: Epi_Hotspot_FuncEnch
Query Cluster	Comparison Cluster	m	n	M	N	pvalue (exact)	pvalue (MORE)	pvalue (LESS)	Bonf corrected pval (exact)	Bonf corrected pval (MORE)	Bonf corrected pval (LESS)					Comparison Cluster		pvalue	# in Overlap	# in Query Cluster	# in Comparison Cluster	Total Yeast Genes
Cluster_Epi-Peak1	Cluster_rESR_APGcategory	m=21	n=52	M=583	N=6532	7.65196e-10	8.81842e-10	1	8.9834e-07	1.03528e-06	1174
Cluster_Epi-Peak1	Cluster_PAC_APGcategory	m=17	n=52	M=455	N=6532	3.08068e-08	3.57852e-08	1	3.61671e-05	4.20119e-05	1174
Cluster_Epi-Peak1	Cluster_ESR_APGcategory	m=22	n=52	M=861	N=6532	1.46961e-07	1.81583e-07	1	0.000172533	0.000213179	1174
Cluster_Epi-Peak10	Cluster_MitochondrialRPs_APGcategory	m=7	n=50	M=54	N=6532	1.29057e-07	1.34297e-07	1	0.000151513	0.000157664	1174
Cluster_Epi-Peak11	Cluster_RPs_APGcategory	m=14	n=17	M=135	N=6532	8.41683e-22	8.44876e-22	1	9.88136e-19	9.91884e-19	1174
Cluster_Epi-Peak11	Cluster_rESR_RPs_APGcategory	m=13	n=17	M=128	N=6532	7.50344e-20	7.54209e-20	1	8.80904e-17	8.85442e-17	1174
Cluster_Epi-Peak11	Cluster_rESR_APGcategory	m=13	n=17	M=583	N=6532	3.32925e-11	3.4222e-11	1	3.90854e-08	4.01767e-08	1174
Cluster_Epi-Peak11	Cluster_ESR_APGcategory	m=13	n=17	M=861	N=6532	4.5659e-09	4.76702e-09	1	5.36037e-06	5.59648e-06	1174
Cluster_Epi-Peak11	Cluster_structural_constituent_of_ribosome_GO	m=6	n=17	M=79	N=6532	2.82383e-08	2.87482e-08	1	3.31518e-05	3.37504e-05	1174
Cluster_Epi-Peak11	Cluster_translation_GO	m=6	n=17	M=161	N=6532	1.94268e-06	2.01938e-06	1	0.00228071	0.00237075	1174
Cluster_Epi-Peak11	Cluster_ribosome_GO	m=5	n=17	M=101	N=6532	4.14622e-06	4.27315e-06	1	0.00486766	0.00501668	1174
Cluster_Epi-Peak11	Cluster_ribonucleoprotein_comple_GO	m=5	n=17	M=103	N=6532	4.5653e-06	4.70809e-06	1	0.00535966	0.0055273	1174
Cluster_Epi-Peak11	Cluster_ScParalogs_E-10_APGcategory	m=13	n=17	M=1511	N=6532	4.36959e-06	4.76536e-06	1	0.0051299	0.00559453	1174
Cluster_Epi-Peak12	Cluster_mitochondrial_inner_membrane_GO	m=7	n=24	M=62	N=6532	1.46866e-09	1.49566e-09	1	1.72421e-06	1.75591e-06	1174
Cluster_Epi-Peak12	Cluster_electron_transport_chain_GO	m=4	n=24	M=17	N=6532	3.20651e-07	3.23233e-07	1	0.000376444	0.000379475	1174
Cluster_Epi-Peak12	Cluster_aerobic_respiration_GO	m=4	n=24	M=19	N=6532	5.19001e-07	5.2383e-07	1	0.000609308	0.000614976	1174
Cluster_Epi-Peak12	Cluster_ubiquinol-cytochrome-c_reductase_activity_GO	m=3	n=24	M=6	N=6532	8.63485e-07	8.65578e-07	1	0.00101373	0.00101619	1174
Cluster_Epi-Peak12	Cluster_mitochondrial_respiratory_chain_comple_III_GO	m=3	n=24	M=7	N=6532	1.50624e-06	1.51111e-06	1	0.00176832	0.00177404	1174
Cluster_Epi-Peak12	Cluster_mitochondrial_respiratory_chain_GO	m=3	n=24	M=7	N=6532	1.50624e-06	1.51111e-06	1	0.00176832	0.00177404	1174
Cluster_Epi-Peak13	Cluster_asparagine_metabolic_process_GO	m=4	n=10	M=4	N=6532	2.77105e-12	2.77156e-12	1	3.25322e-09	3.25381e-09	1174
Cluster_Epi-Peak13	Cluster_asparaginase_activity_GO	m=4	n=10	M=4	N=6532	2.77105e-12	2.77156e-12	1	3.25322e-09	3.25381e-09	1174
Cluster_Epi-Peak13	Cluster_asparagine_catabolic_process_GO	m=4	n=10	M=4	N=6532	2.77105e-12	2.77156e-12	1	3.25322e-09	3.25381e-09	1174
Cluster_Epi-Peak13	Cluster_cellular_response_to_nitrogen_starvation_GO	m=4	n=10	M=5	N=6532	1.38425e-11	1.38451e-11	1	1.62511e-08	1.62541e-08	1174
Cluster_Epi-Peak13	Cluster_Asparagine_APGcategory	m=4	n=10	M=7	N=6532	9.67196e-11	9.6773e-11	1	1.13549e-07	1.13612e-07	1174
Cluster_Epi-Peak13	Cluster_cell_wall-bounded_periplasmic_space_GO	m=4	n=10	M=8	N=6532	1.93261e-10	1.93404e-10	1	2.26889e-07	2.27056e-07	1174
Cluster_Epi-Peak13	Cluster_amino_acid_metabolic_process_GO	m=4	n=10	M=12	N=6532	1.36161e-09	1.36362e-09	1	1.59853e-06	1.60089e-06	1174
Cluster_Epi-Peak13	Cluster_cell_wall_GO	m=4	n=10	M=21	N=6532	1.63272e-08	1.63785e-08	1	1.91681e-05	1.92284e-05	1174
Cluster_Epi-Peak13	Cluster_etracellular_region_GO	m=4	n=10	M=27	N=6532	4.76125e-08	4.78153e-08	1	5.58971e-05	5.61351e-05	1174
Cluster_Epi-Peak14	Cluster_PAC_APGcategory	m=9	n=22	M=455	N=6532	7.09561e-06	7.83207e-06	0.999999	0.00833024	0.00919485	1174
Cluster_Epi-Peak15	Cluster_PAC_APGcategory	m=14	n=21	M=455	N=6532	3.73477e-12	3.86489e-12	1	4.38462e-09	4.53738e-09	1174
Cluster_Epi-Peak15	Cluster_rESR_APGcategory	m=14	n=21	M=583	N=6532	1.08175e-10	1.13187e-10	1	1.26998e-07	1.32881e-07	1174
Cluster_Epi-Peak15	Cluster_ESR_APGcategory	m=14	n=21	M=861	N=6532	1.91171e-08	2.0529e-08	1	2.24435e-05	2.41011e-05	1174
Cluster_Epi-Peak16	Cluster_iESR_APGcategory	m=7	n=12	M=278	N=6532	1.50628e-07	1.54789e-07	1	0.000176837	0.000181722	1174
Cluster_Epi-Peak17	Cluster_MitochondrialRPs_APGcategory	m=9	n=92	M=54	N=6532	4.36778e-08	4.63654e-08	1	5.12778e-05	5.4433e-05	1174
Cluster_Epi-Peak18	Cluster_Mating_APGcategory	m=6	n=25	M=25	N=6532	2.75675e-10	2.7788e-10	1	3.23643e-07	3.26231e-07	1174
Cluster_Epi-Peak18	Cluster_regulation_of_transcription,_mating-type_specific"_GO	m=3	n=25	M=5	N=6532	4.92049e-07	4.92881e-07	1	0.000577665	0.000578643	1174
Cluster_Epi-Peak18	Cluster_Spellman_G2-M_peak	m=7	n=25	M=190	N=6532	4.54981e-06	4.86286e-06	1	0.00534148	0.005709	1174
Cluster_Epi-Peak19	Cluster_Mating_APGcategory	m=9	n=24	M=25	N=6532	4.33943e-17	4.35551e-17	1	5.09449e-14	5.11337e-14	1174
Cluster_Epi-Peak19	Cluster_regulation_of_transcription,_mating-type_specific"_GO	m=3	n=24	M=5	N=6532	4.33136e-07	4.33835e-07	1	0.000508502	0.000509323	1174
Cluster_Epi-Peak19	Cluster_Spellman_M-G1_peak	m=6	n=24	M=113	N=6532	2.34537e-06	2.44982e-06	1	0.00275346	0.00287608	1174
Cluster_Epi-Peak19	Cluster_Spellman_G2-M_peak	m=7	n=24	M=190	N=6532	3.37065e-06	3.58892e-06	1	0.00395714	0.00421339	1174
Cluster_Epi-Peak2	Cluster_RPs_APGcategory	m=9	n=12	M=135	N=6532	1.09312e-13	1.0996e-13	1	1.28332e-10	1.29093e-10	1174
Cluster_Epi-Peak2	Cluster_rESR_RPs_APGcategory	m=7	n=12	M=128	N=6532	6.79393e-10	6.87488e-10	1	7.97607e-07	8.07111e-07	1174
Cluster_Epi-Peak2	Cluster_cytosolic_small_ribosomal_subunit_GO	m=5	n=12	M=32	N=6532	1.56582e-09	1.57344e-09	1	1.83827e-06	1.84722e-06	1174
Cluster_Epi-Peak2	Cluster_structural_constituent_of_ribosome_GO	m=6	n=12	M=79	N=6532	2.23043e-09	2.25222e-09	1	2.61852e-06	2.64411e-06	1174
Cluster_Epi-Peak2	Cluster_ribosome_GO	m=6	n=12	M=101	N=6532	9.96304e-09	1.00905e-08	1	1.16966e-05	1.18462e-05	1174
Cluster_Epi-Peak2	Cluster_ribonucleoprotein_comple_GO	m=6	n=12	M=103	N=6532	1.12196e-08	1.13661e-08	1	1.31718e-05	1.33438e-05	1174
Cluster_Epi-Peak2	Cluster_intracellular_GO	m=6	n=12	M=152	N=6532	1.16169e-07	1.18482e-07	1	0.000136382	0.000139097	1174
Cluster_Epi-Peak2	Cluster_translation_GO	m=6	n=12	M=161	N=6532	1.6359e-07	1.67056e-07	1	0.000192054	0.000196124	1174
Cluster_Epi-Peak2	Cluster_rESR_APGcategory	m=8	n=12	M=583	N=6532	1.3188e-06	1.37715e-06	1	0.00154827	0.00161678	1174
Cluster_Epi-Peak20	Cluster_RPs_APGcategory	m=31	n=34	M=135	N=6532	8.6605e-51	8.67372e-51	1	1.01674e-47	1.01829e-47	1174
Cluster_Epi-Peak20	Cluster_rESR_RPs_APGcategory	m=30	n=34	M=128	N=6532	6.74958e-49	6.76293e-49	1	7.924e-46	7.93968e-46	1174
Cluster_Epi-Peak20	Cluster_rESR_APGcategory	m=32	n=34	M=583	N=6532	5.60582e-32	5.63738e-32	1	6.58123e-29	6.61828e-29	1174
Cluster_Epi-Peak20	Cluster_ESR_APGcategory	m=32	n=34	M=861	N=6532	1.7734e-26	1.78918e-26	1	2.08197e-23	2.10049e-23	1174
Cluster_Epi-Peak20	Cluster_structural_constituent_of_ribosome_GO	m=13	n=34	M=79	N=6532	3.16187e-17	3.21119e-17	1	3.71203e-14	3.76994e-14	1174
Cluster_Epi-Peak20	Cluster_ribosome_GO	m=13	n=34	M=101	N=6532	9.09929e-16	9.29008e-16	1	1.06826e-12	1.09066e-12	1174
Cluster_Epi-Peak20	Cluster_translation_GO	m=14	n=34	M=161	N=6532	1.52595e-14	1.57435e-14	1	1.79146e-11	1.84829e-11	1174
Cluster_Epi-Peak20	Cluster_ribonucleoprotein_comple_GO	m=12	n=34	M=103	N=6532	4.9337e-14	5.05482e-14	1	5.79217e-11	5.93435e-11	1174
Cluster_Epi-Peak20	Cluster_cytosolic_large_ribosomal_subunit_GO	m=9	n=34	M=38	N=6532	1.28899e-13	1.30357e-13	1	1.51327e-10	1.53039e-10	1174
Cluster_Epi-Peak20	Cluster_ScParalogs_E-10_APGcategory	m=27	n=34	M=1511	N=6532	4.99942e-12	5.39304e-12	1	5.86932e-09	6.33143e-09	1174
Cluster_Epi-Peak20	Cluster_intracellular_GO	m=11	n=34	M=152	N=6532	1.30414e-10	1.36171e-10	1	1.53107e-07	1.59865e-07	1174
Cluster_Epi-Peak20	Cluster_cytoplasm_GO	m=14	n=34	M=687	N=6532	2.82143e-06	3.32363e-06	0.999999	0.00331236	0.00390194	1174
Cluster_Epi-Peak21	Cluster_iESR_APGcategory	m=17	n=48	M=278	N=6532	3.64167e-12	3.92313e-12	1	4.27533e-09	4.60575e-09	1174
Cluster_Epi-Peak21	Cluster_ESR_APGcategory	m=19	n=48	M=861	N=6532	3.29918e-06	4.18583e-06	0.999999	0.00387324	0.00491416	1174
Cluster_Epi-Peak21	Cluster_TATAcontaining_APGcategory	m=21	n=48	M=1085	N=6532	6.44461e-06	8.42711e-06	0.999998	0.00756597	0.00989343	1174
Cluster_Epi-Peak22	Cluster_RPs_APGcategory	m=16	n=55	M=135	N=6532	6.47487e-15	6.76414e-15	1	7.6015e-12	7.9411e-12	1174
Cluster_Epi-Peak22	Cluster_rESR_RPs_APGcategory	m=14	n=55	M=128	N=6532	1.25837e-12	1.32283e-12	1	1.47733e-09	1.55301e-09	1174
Cluster_Epi-Peak22	Cluster_rESR_APGcategory	m=17	n=55	M=583	N=6532	2.4951e-06	3.11233e-06	0.999999	0.00292925	0.00365387	1174
Cluster_Epi-Peak22	Cluster_structural_constituent_of_ribosome_GO	m=7	n=55	M=79	N=6532	3.43487e-06	3.68061e-06	1	0.00403254	0.00432104	1174
Cluster_Epi-Peak22	Cluster_translation_GO	m=9	n=55	M=161	N=6532	5.75723e-06	6.46155e-06	0.999999	0.00675899	0.00758586	1174
Cluster_Epi-Peak23	Cluster_Spellman_S_peak	m=5	n=16	M=71	N=6532	5.13944e-07	5.23724e-07	1	0.00060337	0.000614852	1174
Cluster_Epi-Peak3	Cluster_iESR_APGcategory	m=24	n=55	M=278	N=6532	3.38212e-19	3.56165e-19	1	3.9706e-16	4.18138e-16	1174
Cluster_Epi-Peak3	Cluster_ESR_APGcategory	m=25	n=55	M=861	N=6532	3.62713e-09	4.36268e-09	1	4.25826e-06	5.12179e-06	1174
Cluster_Epi-Peak3	Cluster_cellular_response_to_heat_GO	m=6	n=55	M=49	N=6532	2.72094e-06	2.85337e-06	1	0.00319438	0.00334985	1174
Cluster_Epi-Peak3	Cluster_TATAcontaining_APGcategory	m=23	n=55	M=1085	N=6532	5.92659e-06	7.95944e-06	0.999998	0.00695782	0.00934438	1174
Cluster_Epi-Peak4	Cluster_rESR_RPs_APGcategory	m=24	n=66	M=128	N=6532	3.39892e-25	3.49469e-25	1	3.99033e-22	4.10276e-22	1174
Cluster_Epi-Peak4	Cluster_RPs_APGcategory	m=24	n=66	M=135	N=6532	1.32297e-24	1.36288e-24	1	1.55317e-21	1.60002e-21	1174
Cluster_Epi-Peak4	Cluster_rESR_APGcategory	m=33	n=66	M=583	N=6532	3.91565e-18	4.30146e-18	1	4.59697e-15	5.04991e-15	1174
Cluster_Epi-Peak4	Cluster_ESR_APGcategory	m=37	n=66	M=861	N=6532	1.20216e-16	1.35167e-16	1	1.41133e-13	1.58686e-13	1174
Cluster_Epi-Peak4	Cluster_ScParalogs_E-10_APGcategory	m=39	n=66	M=1511	N=6532	2.55139e-10	3.17348e-10	1	2.99534e-07	3.72566e-07	1174
Cluster_Epi-Peak4	Cluster_ribosome_GO	m=10	n=66	M=101	N=6532	4.75264e-08	5.12166e-08	1	5.57959e-05	6.01283e-05	1174
Cluster_Epi-Peak4	Cluster_translation_GO	m=12	n=66	M=161	N=6532	4.68959e-08	5.19327e-08	1	5.50558e-05	6.09689e-05	1174
Cluster_Epi-Peak4	Cluster_ribonucleoprotein_comple_GO	m=10	n=66	M=103	N=6532	5.73461e-08	6.19051e-08	1	6.73243e-05	7.26766e-05	1174
Cluster_Epi-Peak4	Cluster_structural_constituent_of_ribosome_GO	m=9	n=66	M=79	N=6532	6.92364e-08	7.3804e-08	1	8.12835e-05	8.66459e-05	1174
Cluster_Epi-Peak5	Cluster_iESR_APGcategory	m=25	n=118	M=278	N=6532	1.16209e-11	1.36014e-11	1	1.3643e-08	1.5968e-08	1174
Cluster_Epi-Peak5	Cluster_TATAcontaining_APGcategory	m=46	n=118	M=1085	N=6532	2.73906e-09	3.86807e-09	1	3.21566e-06	4.54112e-06	1174
Cluster_Epi-Peak6	Cluster_RPs_APGcategory	m=9	n=21	M=135	N=6532	1.22508e-10	1.25467e-10	1	1.43825e-07	1.47298e-07	1174
Cluster_Epi-Peak6	Cluster_rESR_RPs_APGcategory	m=7	n=21	M=128	N=6532	8.42628e-08	8.71321e-08	1	9.89246e-05	0.000102293	1174
Cluster_Epi-Peak6	Cluster_rESR_APGcategory	m=10	n=21	M=583	N=6532	3.8307e-06	4.23204e-06	1	0.00449725	0.00496841	1174
Cluster_Epi-Peak7	Cluster_intracellular_mRNA_localization_GO	m=3	n=22	M=5	N=6532	3.29763e-07	3.30244e-07	1	0.000387141	0.000387707	1174
Cluster_Epi-Peak8	Cluster_MitochondrialRPs_APGcategory	m=11	n=40	M=54	N=6532	7.95735e-15	8.08737e-15	1	9.34192e-12	9.49457e-12	1174
Cluster_Epi-Peak8	Cluster_mitochondrial_large_ribosomal_subunit_GO	m=4	n=40	M=10	N=6532	2.44979e-07	2.46617e-07	1	0.000287605	0.000289529	1174
Cluster_Epi-Peak8	Cluster_mitochondrial_translation_GO	m=4	n=40	M=15	N=6532	1.54888e-06	1.56798e-06	1	0.00181839	0.00184081	1174
Cluster_Epi-Peak9	Cluster_RPs_APGcategory	m=25	n=61	M=135	N=6532	3.54622e-27	3.63304e-27	1	4.16326e-24	4.26519e-24	1174
Cluster_Epi-Peak9	Cluster_rESR_APGcategory	m=39	n=61	M=583	N=6532	1.16622e-26	1.22797e-26	1	1.36914e-23	1.44163e-23	1174
Cluster_Epi-Peak9	Cluster_rESR_RPs_APGcategory	m=24	n=61	M=128	N=6532	3.50838e-26	3.59512e-26	1	4.11883e-23	4.22067e-23	1174
Cluster_Epi-Peak9	Cluster_ESR_APGcategory	m=42	n=61	M=861	N=6532	1.02819e-23	1.09813e-23	1	1.2071e-20	1.28921e-20	1174
Cluster_Epi-Peak9	Cluster_structural_constituent_of_ribosome_GO	m=14	n=61	M=79	N=6532	5.99569e-15	6.1919e-15	1	7.03893e-12	7.26929e-12	1174
Cluster_Epi-Peak9	Cluster_translation_GO	m=17	n=61	M=161	N=6532	3.89526e-14	4.12356e-14	1	4.57303e-11	4.84106e-11	1174
Cluster_Epi-Peak9	Cluster_ribosome_GO	m=13	n=61	M=101	N=6532	4.4522e-12	4.67196e-12	1	5.22688e-09	5.48488e-09	1174
Cluster_Epi-Peak9	Cluster_ribonucleoprotein_comple_GO	m=13	n=61	M=103	N=6532	5.7527e-12	6.04349e-12	1	6.75367e-09	7.09506e-09	1174
Cluster_Epi-Peak9	Cluster_cytosolic_large_ribosomal_subunit_GO	m=8	n=61	M=38	N=6532	1.37689e-09	1.41555e-09	1	1.61647e-06	1.66186e-06	1174
Cluster_Epi-Peak9	Cluster_intracellular_GO	m=11	n=61	M=152	N=6532	1.05274e-07	1.15923e-07	1	0.000123592	0.000136094	1174
Cluster_Epi-Peak9	Cluster_cytosolic_small_ribosomal_subunit_GO	m=6	n=61	M=32	N=6532	3.74984e-07	3.87186e-07	1	0.000440231	0.000454557	1174
Cluster_Epi-Peak9	Cluster_ScParalogs_E-10_APGcategory	m=30	n=61	M=1511	N=6532	5.09722e-06	7.17394e-06	0.999998	0.00598414	0.00842221	1174
Cluster_Epi-Peak9	Cluster_cytoplasm_GO	m=19	n=61	M=687	N=6532	6.46968e-06	8.47461e-06	0.999998	0.0075954	0.00994919	1174

## Sheet: Epi_Hotspot_RegEnch
Query Cluster	Comparison Cluster	m	n	M	N	pvalue (exact)	pvalue (MORE)	pvalue (LESS)	Bonf corrected pval (exact)	Bonf corrected pval (MORE)	Bonf corrected pval (LESS)
Cluster_Epi-Peak11	Cluster_YeasTractDirect_IFH1	m=14	n=17	M=243	N=6532	4.1121e-18	4.1422e-18	1	3.26912e-15	3.29305e-15	795
Cluster_Epi-Peak11	Cluster_YeasTractDirect_SFP1	m=12	n=17	M=212	N=6532	5.3214e-15	5.38679e-15	1	4.23051e-12	4.2825e-12	795
Cluster_Epi-Peak11	Cluster_Harbison_FHL1_YPD	m=10	n=17	M=114	N=6532	3.05606e-14	3.08786e-14	1	2.42957e-11	2.45485e-11	795
Cluster_Epi-Peak11	Cluster_YeasTractDirect_FHL1	m=15	n=17	M=762	N=6532	9.50994e-13	9.66503e-13	1	7.5604e-10	7.6837e-10	795
Cluster_Epi-Peak11	Cluster_Harbison_FHL1_RAPA	m=8	n=17	M=121	N=6532	2.28341e-10	2.32428e-10	1	1.81531e-07	1.8478e-07	795
Cluster_Epi-Peak11	Cluster_Harbison_FHL1_SM	m=8	n=17	M=128	N=6532	3.59282e-10	3.66124e-10	1	2.85629e-07	2.91069e-07	795
Cluster_Epi-Peak11	Cluster_Venters25-37C_Rap1	m=13	n=17	M=710	N=6532	4.05553e-10	4.19769e-10	1	3.22415e-07	3.33717e-07	795
Cluster_Epi-Peak11	Cluster_Venters25-37C_Ifh1	m=7	n=17	M=91	N=6532	1.37794e-09	1.40073e-09	1	1.09546e-06	1.11358e-06	795
Cluster_Epi-Peak11	Cluster_YeasTractDirect_RAP1	m=14	n=17	M=1286	N=6532	4.40093e-08	4.62099e-08	1	3.49874e-05	3.67368e-05	795
Cluster_Epi-Peak11	Cluster_MacIsaac_FHL1	m=5	n=17	M=87	N=6532	1.98534e-06	2.03696e-06	1	0.00157834	0.00161938	795
Cluster_Epi-Peak12	Cluster_YeasTractDirect_HAP4	m=16	n=24	M=187	N=6532	6.36948e-20	6.4512e-20	1	5.06374e-17	5.12871e-17	795
Cluster_Epi-Peak12	Cluster_Harbison_HAP4_YPD	m=11	n=24	M=40	N=6532	2.37323e-19	2.38478e-19	1	1.88672e-16	1.8959e-16	795
Cluster_Epi-Peak12	Cluster_MacIsaac_HAP4	m=10	n=24	M=33	N=6532	4.46433e-18	4.48455e-18	1	3.54914e-15	3.56522e-15	795
Cluster_Epi-Peak12	Cluster_YeasTractDirect_HAP3	m=14	n=24	M=156	N=6532	1.71783e-17	1.74369e-17	1	1.36567e-14	1.38623e-14	795
Cluster_Epi-Peak12	Cluster_YeasTractDirect_HAP2	m=14	n=24	M=163	N=6532	3.2257e-17	3.27674e-17	1	2.56443e-14	2.60501e-14	795
Cluster_Epi-Peak12	Cluster_YeasTractDirect_HAP5	m=14	n=24	M=167	N=6532	4.56502e-17	4.63927e-17	1	3.62919e-14	3.68822e-14	795
Cluster_Epi-Peak12	Cluster_Harbison_HAP5_SM	m=5	n=24	M=30	N=6532	5.69073e-08	5.76088e-08	1	4.52413e-05	4.5799e-05	795
Cluster_Epi-Peak12	Cluster_YeasTractDirect_HAP1	m=7	n=24	M=147	N=6532	6.07005e-07	6.36495e-07	1	0.000482569	0.000506013	795
Cluster_Epi-Peak12	Cluster_Harbison_HAP1_YPD	m=6	n=24	M=100	N=6532	1.14766e-06	1.19227e-06	1	0.000912389	0.000947854	795
Cluster_Epi-Peak12	Cluster_Harbison_HAP2_RAPA	m=4	n=24	M=33	N=6532	5.2481e-06	5.34335e-06	1	0.00417224	0.00424796	795
Cluster_Epi-Peak19	Cluster_YeasTractDirect_MCM1	m=11	n=24	M=378	N=6532	2.49286e-08	2.66354e-08	1	1.98183e-05	2.11751e-05	795
Cluster_Epi-Peak19	Cluster_Venters25-37C_Put3	m=4	n=24	M=18	N=6532	4.11e-07	4.14566e-07	1	0.000326745	0.00032958	795
Cluster_Epi-Peak19	Cluster_YeasTractDirect_ZAP1	m=5	n=24	M=70	N=6532	4.29771e-06	4.43857e-06	1	0.00341668	0.00352866	795
Cluster_Epi-Peak19	Cluster_Harbison_MCM1_Alpha	m=5	n=24	M=72	N=6532	4.93915e-06	5.10619e-06	1	0.00392662	0.00405942	795
Cluster_Epi-Peak2	Cluster_YeasTractDirect_IFH1	m=10	n=12	M=243	N=6532	2.60042e-13	2.61799e-13	1	2.06733e-10	2.0813e-10	795
Cluster_Epi-Peak2	Cluster_YeasTractDirect_SFP1	m=9	n=12	M=212	N=6532	6.7682e-12	6.83382e-12	1	5.38072e-09	5.43289e-09	795
Cluster_Epi-Peak2	Cluster_Venters25-37C_Ifh1	m=6	n=12	M=91	N=6532	5.28921e-09	5.34958e-09	1	4.20492e-06	4.25291e-06	795
Cluster_Epi-Peak2	Cluster_YeasTractDirect_FHL1	m=10	n=12	M=762	N=6532	2.28798e-08	2.34279e-08	1	1.81894e-05	1.86252e-05	795
Cluster_Epi-Peak2	Cluster_YeasTractDirect_RAP1	m=11	n=12	M=1286	N=6532	1.60647e-07	1.639e-07	1	0.000127714	0.000130301	795
Cluster_Epi-Peak20	Cluster_YeasTractDirect_SFP1	m=29	n=34	M=212	N=6532	2.31827e-39	2.32951e-39	1	1.84303e-36	1.85196e-36	795
Cluster_Epi-Peak20	Cluster_YeasTractDirect_IFH1	m=29	n=34	M=243	N=6532	1.54621e-37	1.55502e-37	1	1.22924e-34	1.23624e-34	795
Cluster_Epi-Peak20	Cluster_Harbison_FHL1_YPD	m=23	n=34	M=114	N=6532	8.59895e-34	8.65524e-34	1	6.83617e-31	6.88091e-31	795
Cluster_Epi-Peak20	Cluster_Harbison_FHL1_RAPA	m=23	n=34	M=121	N=6532	3.8777e-33	3.90508e-33	1	3.08277e-30	3.10454e-30	795
Cluster_Epi-Peak20	Cluster_Harbison_FHL1_SM	m=23	n=34	M=128	N=6532	1.59117e-32	1.60322e-32	1	1.26498e-29	1.27456e-29	795
Cluster_Epi-Peak20	Cluster_YeasTractDirect_FHL1	m=32	n=34	M=762	N=6532	3.41133e-28	3.43759e-28	1	2.712e-25	2.73288e-25	795
Cluster_Epi-Peak20	Cluster_Venters25-37C_Ifh1	m=19	n=34	M=91	N=6532	1.16295e-27	1.17279e-27	1	9.24542e-25	9.32367e-25	795
Cluster_Epi-Peak20	Cluster_YeasTractDirect_RAP1	m=32	n=34	M=1286	N=6532	6.93669e-21	7.03791e-21	1	5.51467e-18	5.59514e-18	795
Cluster_Epi-Peak20	Cluster_MacIsaac_FHL1	m=15	n=34	M=87	N=6532	3.12529e-20	3.16736e-20	1	2.4846e-17	2.51805e-17	795
Cluster_Epi-Peak20	Cluster_Harbison_RAP1_YPD	m=13	n=34	M=93	N=6532	2.97072e-16	3.02718e-16	1	2.36172e-13	2.40661e-13	795
Cluster_Epi-Peak20	Cluster_Venters25-37C_Rap1	m=23	n=34	M=710	N=6532	4.13544e-15	4.37051e-15	1	3.28768e-12	3.47456e-12	795
Cluster_Epi-Peak20	Cluster_Harbison_SFP1_SM	m=8	n=34	M=31	N=6532	1.59621e-12	1.61273e-12	1	1.26899e-09	1.28212e-09	795
Cluster_Epi-Peak20	Cluster_Venters25-37C_Esa1	m=24	n=34	M=1590	N=6532	1.36877e-08	1.5636e-08	1	1.08817e-05	1.24306e-05	795
Cluster_Epi-Peak20	Cluster_Venters25-37C_Taf4	m=26	n=34	M=1954	N=6532	2.28589e-08	2.60449e-08	1	1.81728e-05	2.07057e-05	795
Cluster_Epi-Peak20	Cluster_MacIsaac_RAP1	m=7	n=34	M=74	N=6532	7.2972e-08	7.56154e-08	1	5.80128e-05	6.01143e-05	795
Cluster_Epi-Peak20	Cluster_Venters25-37C_Ess1	m=14	n=34	M=554	N=6532	2.10833e-07	2.39328e-07	1	0.000167612	0.000190266	795
Cluster_Epi-Peak20	Cluster_YeasTractDirect_GAT3	m=8	n=34	M=131	N=6532	2.33723e-07	2.47398e-07	1	0.00018581	0.000196682	795
Cluster_Epi-Peak20	Cluster_MacIsaac_SFP1	m=4	n=34	M=16	N=6532	1.05382e-06	1.06561e-06	1	0.000837783	0.000847159	795
Cluster_Epi-Peak20	Cluster_Venters25-37C_Rtt103	m=20	n=34	M=1425	N=6532	2.47815e-06	3.02018e-06	0.999999	0.00197013	0.00240105	795
Cluster_Epi-Peak20	Cluster_Venters25-37C_Pcf11	m=17	n=34	M=1027	N=6532	2.59915e-06	3.13168e-06	0.999999	0.00206632	0.00248969	795
Cluster_Epi-Peak20	Cluster_Venters25-37C_Taf13	m=23	n=34	M=1949	N=6532	4.55846e-06	5.6111e-06	0.999999	0.00362398	0.00446082	794.999
Cluster_Epi-Peak21	Cluster_YeasTractDirect_ADR1	m=12	n=48	M=190	N=6532	6.66755e-09	7.22766e-09	1	5.3007e-06	5.74599e-06	795
Cluster_Epi-Peak21	Cluster_YeasTractDirect_HOT1	m=7	n=48	M=66	N=6532	3.93311e-07	4.12587e-07	1	0.000312682	0.000328006	795
Cluster_Epi-Peak21	Cluster_Venters25-37C_TBP	m=31	n=48	M=2212	N=6532	9.26694e-06	1.25446e-05	0.999997	0.00736722	0.00997292	794.997
Cluster_Epi-Peak23	Cluster_MacIsaac_MET32	m=8	n=16	M=17	N=6532	3.78075e-18	3.7854e-18	1	3.0057e-15	3.0094e-15	795
Cluster_Epi-Peak23	Cluster_Harbison_MET32_SM	m=8	n=16	M=29	N=6532	6.57747e-16	6.59641e-16	1	5.22909e-13	5.24415e-13	795
Cluster_Epi-Peak23	Cluster_YeasTractDirect_MET4	m=8	n=16	M=55	N=6532	1.80697e-13	1.8187e-13	1	1.43654e-10	1.44586e-10	795
Cluster_Epi-Peak23	Cluster_YeasTractDirect_MET32	m=8	n=16	M=79	N=6532	3.75843e-12	3.79551e-12	1	2.98796e-09	3.01743e-09	795
Cluster_Epi-Peak23	Cluster_YeasTractDirect_MET28	m=7	n=16	M=50	N=6532	1.07292e-11	1.08099e-11	1	8.52973e-09	8.59384e-09	795
Cluster_Epi-Peak23	Cluster_Harbison_MET32_YPD	m=6	n=16	M=36	N=6532	1.38387e-10	1.39306e-10	1	1.10018e-07	1.10748e-07	795
Cluster_Epi-Peak23	Cluster_MacIsaac_MET4	m=4	n=16	M=7	N=6532	8.35925e-10	8.3685e-10	1	6.6456e-07	6.65295e-07	795
Cluster_Epi-Peak23	Cluster_MacIsaac_MET31	m=4	n=16	M=19	N=6532	9.05486e-08	9.10519e-08	1	7.19861e-05	7.23863e-05	795
Cluster_Epi-Peak23	Cluster_YeasTractDirect_CBF1	m=8	n=16	M=322	N=6532	2.78217e-07	2.9119e-07	1	0.000221183	0.000231496	795
Cluster_Epi-Peak23	Cluster_YeasTractDirect_LEU3	m=7	n=16	M=231	N=6532	5.28813e-07	5.50672e-07	1	0.000420406	0.000437785	795
Cluster_Epi-Peak23	Cluster_Harbison_MET4_YPD	m=3	n=16	M=8	N=6532	6.68743e-07	6.70414e-07	1	0.00053165	0.000532979	795
Cluster_Epi-Peak23	Cluster_YeasTractDirect_MET31	m=5	n=16	M=83	N=6532	1.12288e-06	1.14825e-06	1	0.000892689	0.000912857	795
Cluster_Epi-Peak23	Cluster_MacIsaac_CBF1	m=6	n=16	M=159	N=6532	1.19694e-06	1.23918e-06	1	0.000951566	0.000985145	795
Cluster_Epi-Peak23	Cluster_Harbison_CBF1_SM	m=6	n=16	M=166	N=6532	1.53932e-06	1.59626e-06	1	0.00122376	0.00126903	795
Cluster_Epi-Peak23	Cluster_Harbison_MET31_YPD	m=3	n=16	M=16	N=6532	6.5815e-06	6.62445e-06	1	0.0052323	0.00526644	795
Cluster_Epi-Peak24	Cluster_ScherrerRBP_STI1	m=8	n=17	M=86	N=6532	1.41425e-11	1.43155e-11	1	1.12433e-08	1.13808e-08	795
Cluster_Epi-Peak24	Cluster_YeasTractDirect_GAT3	m=6	n=17	M=131	N=6532	5.80799e-07	5.99092e-07	1	0.000461736	0.000476278	795
Cluster_Epi-Peak24	Cluster_YeasTractDirect_SOK2	m=10	n=17	M=769	N=6532	3.97046e-06	4.32665e-06	1	0.00315652	0.00343969	795
Cluster_Epi-Peak24	Cluster_YeasTractDirect_HAP4	m=6	n=17	M=187	N=6532	4.62054e-06	4.83558e-06	1	0.00367333	0.00384428	795
Cluster_Epi-Peak24	Cluster_YeasTractDirect_SWI5	m=6	n=17	M=195	N=6532	5.87863e-06	6.16514e-06	1	0.00467351	0.00490129	795
Cluster_Epi-Peak24	Cluster_YeasTractDirect_YAP5	m=8	n=17	M=449	N=6532	6.0852e-06	6.55375e-06	1	0.00483773	0.00521023	795
Cluster_Epi-Peak24	Cluster_YeasTractDirect_GAL4	m=5	n=17	M=119	N=6532	9.24376e-06	9.58229e-06	1	0.00734879	0.00761792	795
Cluster_Epi-Peak24	Cluster_YeasTractDirect_GZF3	m=4	n=17	M=57	N=6532	1.11569e-05	1.13986e-05	1	0.00886973	0.00906192	795
Cluster_Epi-Peak3	Cluster_YeasTractDirect_SKO1	m=18	n=55	M=543	N=6532	1.76392e-07	2.12296e-07	1	0.000140232	0.000168775	795
Cluster_Epi-Peak3	Cluster_YeasTractDirect_HOT1	m=7	n=55	M=66	N=6532	1.01678e-06	1.07561e-06	1	0.000808338	0.000855109	795
Cluster_Epi-Peak3	Cluster_YeasTractDirect_ADR1	m=10	n=55	M=190	N=6532	2.8361e-06	3.20577e-06	1	0.0022547	0.00254859	795
Cluster_Epi-Peak3	Cluster_YeasTractDirect_CAD1	m=10	n=55	M=208	N=6532	6.29902e-06	7.21554e-06	0.999999	0.00500772	0.00573635	794.999
Cluster_Epi-Peak4	Cluster_YeasTractDirect_IFH1	m=23	n=66	M=243	N=6532	3.72329e-17	3.97286e-17	1	2.96002e-14	3.15842e-14	795
Cluster_Epi-Peak4	Cluster_Harbison_FHL1_YPD	m=17	n=66	M=114	N=6532	4.52745e-16	4.72253e-16	1	3.59932e-13	3.75441e-13	795
Cluster_Epi-Peak4	Cluster_YeasTractDirect_SFP1	m=21	n=66	M=212	N=6532	4.70025e-16	5.01074e-16	1	3.7367e-13	3.98354e-13	795
Cluster_Epi-Peak4	Cluster_Harbison_FHL1_RAPA	m=17	n=66	M=121	N=6532	1.27534e-15	1.3345e-15	1	1.0139e-12	1.06093e-12	795
Cluster_Epi-Peak4	Cluster_Harbison_FHL1_SM	m=17	n=66	M=128	N=6532	3.36378e-15	3.53098e-15	1	2.67421e-12	2.80713e-12	795
Cluster_Epi-Peak4	Cluster_Venters25-37C_Ifh1	m=14	n=66	M=91	N=6532	1.52704e-13	1.59333e-13	1	1.214e-10	1.2667e-10	795
Cluster_Epi-Peak4	Cluster_MacIsaac_FHL1	m=13	n=66	M=87	N=6532	1.8226e-12	1.90575e-12	1	1.44897e-09	1.51507e-09	795
Cluster_Epi-Peak4	Cluster_YeasTractDirect_FHL1	m=30	n=66	M=762	N=6532	4.50818e-12	5.28345e-12	1	3.584e-09	4.20034e-09	795
Cluster_Epi-Peak4	Cluster_Harbison_RAP1_YPD	m=12	n=66	M=93	N=6532	8.35045e-11	8.81221e-11	1	6.63861e-08	7.00571e-08	795
Cluster_Epi-Peak4	Cluster_Harbison_SFP1_SM	m=8	n=66	M=31	N=6532	4.50662e-10	4.61233e-10	1	3.58276e-07	3.6668e-07	795
Cluster_Epi-Peak4	Cluster_MacIsaac_RAP1	m=10	n=66	M=74	N=6532	2.24932e-09	2.36915e-09	1	1.78821e-06	1.88348e-06	795
Cluster_Epi-Peak4	Cluster_Venters25-37C_Ess1	m=21	n=66	M=554	N=6532	4.16573e-08	5.08703e-08	1	3.31176e-05	4.04419e-05	795
Cluster_Epi-Peak4	Cluster_ScherrerRBP_YMR1	m=8	n=66	M=64	N=6532	1.87982e-07	1.99104e-07	1	0.000149446	0.000158288	795
Cluster_Epi-Peak4	Cluster_YeasTractDirect_RAP1	m=31	n=66	M=1286	N=6532	3.3843e-07	4.56223e-07	1	0.000269052	0.000362698	795
Cluster_Epi-Peak4	Cluster_Venters25-37C_Rap1	m=22	n=66	M=710	N=6532	6.13656e-07	7.90453e-07	1	0.000487856	0.00062841	795
Cluster_Epi-Peak5	Cluster_YeasTractDirect_ADR1	m=17	n=118	M=190	N=6532	3.36735e-08	3.97873e-08	1	2.67704e-05	3.16309e-05	795
Cluster_Epi-Peak6	Cluster_YeasTractDirect_SFP1	m=9	n=21	M=212	N=6532	6.80122e-09	7.07246e-09	1	5.40697e-06	5.62261e-06	795
Cluster_Epi-Peak6	Cluster_YeasTractDirect_IFH1	m=9	n=21	M=243	N=6532	2.23884e-08	2.34281e-08	1	1.77988e-05	1.86253e-05	795
Cluster_Epi-Peak6	Cluster_Harbison_FHL1_RAPA	m=7	n=21	M=121	N=6532	5.71533e-08	5.89819e-08	1	4.54369e-05	4.68906e-05	795
Cluster_Epi-Peak6	Cluster_Harbison_FHL1_SM	m=7	n=21	M=128	N=6532	8.42628e-08	8.71321e-08	1	6.6989e-05	6.927e-05	795
Cluster_Epi-Peak6	Cluster_Venters25-37C_Ifh1	m=6	n=21	M=91	N=6532	2.75999e-07	2.84003e-07	1	0.000219419	0.000225783	795
Cluster_Epi-Peak6	Cluster_Harbison_FHL1_YPD	m=6	n=21	M=114	N=6532	1.04652e-06	1.08547e-06	1	0.000831984	0.00086295	795
Cluster_Epi-Peak6	Cluster_MacIsaac_FHL1	m=5	n=21	M=87	N=6532	6.20609e-06	6.42297e-06	1	0.00493385	0.00510626	795
Cluster_Epi-Peak9	Cluster_YeasTractDirect_IFH1	m=26	n=61	M=243	N=6532	6.64566e-22	6.95757e-22	1	5.2833e-19	5.53127e-19	795
Cluster_Epi-Peak9	Cluster_YeasTractDirect_SFP1	m=24	n=61	M=212	N=6532	1.00809e-20	1.05464e-20	1	8.0143e-18	8.38436e-18	795
Cluster_Epi-Peak9	Cluster_Harbison_FHL1_YPD	m=15	n=61	M=114	N=6532	5.73179e-14	5.99859e-14	1	4.55677e-11	4.76888e-11	795
Cluster_Epi-Peak9	Cluster_Harbison_FHL1_RAPA	m=15	n=61	M=121	N=6532	1.41209e-13	1.48276e-13	1	1.12261e-10	1.1788e-10	795
Cluster_Epi-Peak9	Cluster_Harbison_FHL1_SM	m=15	n=61	M=128	N=6532	3.28621e-13	3.46227e-13	1	2.61254e-10	2.7525e-10	795
Cluster_Epi-Peak9	Cluster_Venters25-37C_Ifh1	m=13	n=61	M=91	N=6532	1.12727e-12	1.17626e-12	1	8.9618e-10	9.35126e-10	795
Cluster_Epi-Peak9	Cluster_YeasTractDirect_FHL1	m=29	n=61	M=762	N=6532	2.54454e-12	2.94135e-12	1	2.02291e-09	2.33837e-09	795
Cluster_Epi-Peak9	Cluster_MacIsaac_FHL1	m=12	n=61	M=87	N=6532	1.40276e-11	1.4673e-11	1	1.11519e-08	1.1665e-08	795
Cluster_Epi-Peak9	Cluster_Venters25-37C_Rap1	m=23	n=61	M=710	N=6532	2.63899e-08	3.23908e-08	1	2.098e-05	2.57507e-05	795
Cluster_Epi-Peak9	Cluster_Harbison_RAP1_YPD	m=9	n=61	M=93	N=6532	1.42913e-07	1.53307e-07	1	0.000113616	0.000121879	795
Cluster_Epi-Peak9	Cluster_YeasTractDirect_RAP1	m=30	n=61	M=1286	N=6532	1.5009e-07	1.96519e-07	1	0.000119321	0.000156233	795
Cluster_Epi-Peak9	Cluster_Harbison_SFP1_SM	m=6	n=61	M=31	N=6532	3.07274e-07	3.16877e-07	1	0.000244283	0.000251917	795
Cluster_Epi-Peak9	Cluster_MacIsaac_RAP1	m=7	n=61	M=74	N=6532	4.47078e-06	4.80667e-06	1	0.00355427	0.00382131	795
Cluster_Epi-Peak9	Cluster_Venters25-37C_Taf13	m=35	n=61	M=1949	N=6532	4.56004e-06	6.47205e-06	0.999998	0.00362523	0.00514528	794.998
Cluster_Epi-Peak9	Cluster_Venters25-37C_Taf4	m=35	n=61	M=1954	N=6532	4.85174e-06	6.89643e-06	0.999998	0.00385713	0.00548266	794.998
Cluster_Epi-Peak9	Cluster_MacIsaac_SFP1	m=4	n=61	M=16	N=6532	1.12798e-05	1.15226e-05	1	0.00896748	0.00916043	795
