# Supplementary material for: Genetic Architecture of Ethanol-Responsive Transcriptome Variation in Saccharomyces cerevisiae Strains
Source: Oxford University Press journal article supplement (doi:10.1534/genetics.114.167429), 2014-06-26
Supplement: genetics.114.167429-5.xls [file genetics.114.167429-5.xls]

## Sheet: MKT1traits_RegulatorEncht.txt
Query Cluster	Comparison Cluster	pvalue	# in Overlap	# in Query Cluster	# in Comparison Cluster	Total Yeast Genes
Cluster_MKT1-mappingTraits	Cluster_Harbison_SWI4_YPD	8.93552e-06	19	404	106	6951
Cluster_MKT1-mappingTraits	Cluster_Harbison_SWI6_YPD	2.20771e-05	18	404	103	6951
Cluster_MKT1-mappingTraits_Mcust10	Cluster_Venters25-37C_Nut1	2.85548e-06	30	49	2026	6951
Cluster_MKT1-mappingTraits_Mcust12	Cluster_hog1-(q<0.025)_WT-induced_defective	6.66484e-24	41	63	804	6951
Cluster_MKT1-mappingTraits_Mcust12	Cluster_pde2 (q<0.025)	6.84027e-20	33	63	576	6951
Cluster_MKT1-mappingTraits_Mcust12	Cluster_cdc14-(q<0.01)_WT-induced_defective	7.9014e-20	37	63	784	6951
Cluster_MKT1-mappingTraits_Mcust12	Cluster_hog1 (q<0.025)	7.68746e-13	45	63	1942	6951
Cluster_MKT1-mappingTraits_Mcust12	Cluster_msn2 (q<0.025)	2.90235e-07	12	63	210	6951
Cluster_MKT1-mappingTraits_Mcust12	Cluster_rim15-(95thConfidence)_WT-induced_defective	5.22209e-07	11	63	181	6951
Cluster_MKT1-mappingTraits_Mcust12	Cluster_mck1-(q<0.025)_WT-induced_defective	7.39034e-07	12	63	229	6951
Cluster_MKT1-mappingTraits_Mcust12	Cluster_gpb2-(95thConfidence)_WT-induced_defective	8.79554e-07	10	63	152	6951
Cluster_MKT1-mappingTraits_Mcust12	Cluster_sub1-(95thConfidence)_WT-induced_defective	2.45175e-06	10	63	170	6951
Cluster_MKT1-mappingTraits_Mcust12	Cluster_Venters25-37C_TBP	5.12154e-06	38	63	2264	6951
Cluster_MKT1-mappingTraits_Mcust12	Cluster_Venters25-37C_Ssl1	3.42806e-05	48	63	3546	6951
Cluster_MKT1-mappingTraits_Mcust12	Cluster_gpb2	4.91831e-05	10	63	239	6951
Cluster_MKT1-mappingTraits_Mcust16	Cluster_msn2 (q<0.025)	4.83835e-09	6	7	210	6951
Cluster_MKT1-mappingTraits_Mcust16	Cluster_pde2 (q<0.025)	2.59445e-08	7	7	576	6951
Cluster_MKT1-mappingTraits_Mcust16	Cluster_cdc14-(q<0.01)_WT-induced_defective	1.28079e-05	6	7	784	6951
Cluster_MKT1-mappingTraits_Mcust17	Cluster_MacIsaac_RPN4	4.29442e-11	7	16	64	6951
Cluster_MKT1-mappingTraits_Mcust18	Cluster_cdc14-(q<0.01)_WT-induced_defective	1.32303e-12	26	50	784	6951
Cluster_MKT1-mappingTraits_Mcust18	Cluster_rim15-(95thConfidence)_WT-induced_defective	4.25328e-08	11	50	181	6951
Cluster_MKT1-mappingTraits_Mcust18	Cluster_pde2 (q<0.025)	1.37701e-06	16	50	576	6951
Cluster_MKT1-mappingTraits_Mcust18	Cluster_hog1 (q<0.025)	2.67495e-05	28	50	1942	6951
Cluster_MKT1-mappingTraits_Mcust18	Cluster_mck1-(q<0.025)_WT-induced_defective	3.01155e-05	9	50	229	6951
Cluster_MKT1-mappingTraits_Mcust22	Cluster_hog1 (q<0.025)	2.74169e-07	34	56	1942	6951
Cluster_MKT1-mappingTraits_Mcust22	Cluster_cdc14-(q<0.01)_WT-induced_defective	2.74788e-07	21	56	784	6951
Cluster_MKT1-mappingTraits_Mcust22	Cluster_ygr122w-(95thConfidence)_WT-induced_amplified	2.68089e-05	10	56	252	6951
Cluster_MKT1-mappingTraits_Mcust3	Cluster_YeasTractDirect_YAP1	1.58382e-06	6	8	441	6951
Cluster_MKT1-mappingTraits_Mcust3	Cluster_YeasTractDirect_PHD1	2.91703e-06	6	8	489	6951
Cluster_MKT1-mappingTraits_Mcust3	Cluster_YeasTractDirect_CIN5	5.34984e-06	6	8	542	6951
Cluster_MKT1-mappingTraits_Mcust34	Cluster_pho85-(greater-than-1.5X-defect)_WT-repressed_defectiveive	1.11483e-05	6	12	350	6951
Cluster_MKT1-mappingTraits_Mcust34	Cluster_hog1-(q<0.025)_WT-repressed_defective	1.36934e-05	7	12	573	6951
Cluster_MKT1-mappingTraits_Mcust35	Cluster_cdc14-(q<0.01)_WT-repressed_defective	4.59563e-23	70	166	842	6951
Cluster_MKT1-mappingTraits_Mcust35	Cluster_mck1-(q<0.025)_WT-repressed_defective	5.98424e-13	44	166	564	6951
Cluster_MKT1-mappingTraits_Mcust35	Cluster_hog1-(q<0.025)_WT-repressed_defective	1.04348e-12	44	166	573	6951
Cluster_MKT1-mappingTraits_Mcust35	Cluster_mck1 (q<0.025)_defective	4.17448e-08	44	166	793	6951
Cluster_MKT1-mappingTraits_Mcust35	Cluster_Venters25-37C_Bur6	6.81414e-08	96	166	2612	6951
Cluster_MKT1-mappingTraits_Mcust35	Cluster_Venters25-37C_Tfb1	3.2536e-07	81	166	2105	6951
Cluster_MKT1-mappingTraits_Mcust35	Cluster_Venters25-37C_Hfi1	3.6509e-07	56	166	1231	6951
Cluster_MKT1-mappingTraits_Mcust35	Cluster_Venters25-37C_Reb1	5.96661e-07	76	166	1947	6951
Cluster_MKT1-mappingTraits_Mcust35	Cluster_YeasTractDirect_FKH2	1.2595e-06	22	166	290	6951
Cluster_MKT1-mappingTraits_Mcust35	Cluster_mck1 (q<0.025)	1.32026e-06	44	166	894	6951
Cluster_MKT1-mappingTraits_Mcust35	Cluster_Venters25-37C_Tfa2	2.41454e-06	62	166	1508	6951
Cluster_MKT1-mappingTraits_Mcust35	Cluster_YeasTractDirect_FKH1	3.37195e-06	18	166	216	6951
Cluster_MKT1-mappingTraits_Mcust35	Cluster_Venters25-37C_Ssl1	1.02966e-05	112	166	3546	6951
Cluster_MKT1-mappingTraits_Mcust35	Cluster_Venters25-37C_Ncb2	1.26752e-05	65	166	1690	6951
Cluster_MKT1-mappingTraits_Mcust35	Cluster_Venters25-37C_Rpb3	1.5965e-05	56	166	1383	6951
Cluster_MKT1-mappingTraits_Mcust35	Cluster_pde2-(q<0.025)_WT-repressed_defective	2.99832e-05	15	166	184	6951
Cluster_MKT1-mappingTraits_Mcust35	Cluster_Venters25-37C_Nhp6a	3.83907e-05	65	166	1746	6951
Cluster_MKT1-mappingTraits_Mcust35	Cluster_Venters25-37C_Vps72	4.45393e-05	108	166	3464	6951
Cluster_MKT1-mappingTraits_Mcust35	Cluster_Venters25-37C_Swi5	4.96253e-05	30	166	589	6951
