# Supplementary material for: Genetic Architecture of Ethanol-Responsive Transcriptome Variation in Saccharomyces cerevisiae Strains
Source: Oxford University Press journal article supplement (doi:10.1534/genetics.114.167429), 2014-06-26
Supplement: genetics.114.167429-6.xls [file genetics.114.167429-6.xls]

## Sheet: Basal Abundance 
YORF	DBY_1	DBY_2	DBY_3	DBY_4	DBY_5	DBY_6	M22_1	M22_2	M22_3	M22_4	M22_5	M22_6	YPS_1	YPS_2	YPS_3	YPS_4	YPS_5	YPS_6	MS_1.3_1	MS_1.3_2	MS_2.1_1	MS_2.1_2	MS_3.2_1	MS_3.2_2	MS_4.3_1	MS_4.3_2	MS_5.4_1	MS_5.4_2	MS_6.4_1	MS_6.4_2	MS_7.4_1	MS_7.4_2	MS_8.2_1	MS_8.2_2	MS_9.3_1	MS_9.3_2	MS_10.2_1	MS_10.2_2	MS_11.2_1	MS_11.2_2	MS_12.4_1	MS_12.4_2	MS_13.1_1	MS_13.1_2	MS_14.2_1	MS_14.2_2	MS_15.3_1	MS_15.3_2	MS_16.2_1
YHR055C	3.24185	3.45337	3.04335	3.64164	3.44835	3.59828	3.95289	4.13958	3.35321	3.47485	3.49724	3.95345	1.26461	0.97485	0.9978	3.69832	0.46886	1.4228	3.73276	3.67415	3.21419	2.66888	4.23368	5.45756	3.07331	3.05322	3.3103	2.65849	3.86487	5.31926	3.04049	5.0142	4.36304	3.49568	4.20973	4.49134	3.3388	3.38947	3.42886	3.2872	4.44924	4.35544	4.55133	5.20304	2.73997	5.47507	4.73876	3.93545	4.80286
YPR161C	0.63659	0.57869	0.89306	0.78923	0.72065	0.70073	0.26844	0.26172	0.46769	0.27892	0.52078	0.35782	0.04381	0.12016	0.05222	-0.17823	0.0013	0.0683	0.45408	0.6408	0.30622	0.16042	0.03599	0.44549	0.57447	0.24839	0.54422	0.58055	0.58703	0.63973	-0.08746	0.18666	0.47901	0.23154	0.43679	0.77549	0.29643	0.38015	0.0426	0.4907	0.67214	0.70029	0.42318	0.28038	0.53652	0.67999	0.85849	0.59299	0.47554
YOL138C	-0.62203	-0.72309	-0.5604	-0.74871	-0.74112	-0.79935	-0.63489	-0.49632	-0.61789	-0.82893	-0.60193	-0.60909	-0.79191	-0.9013	-0.96126	-0.93756	-0.93547	-1.07174	-0.82192	-0.75077	-0.84172	-0.94475	-0.8746	-0.9139	-0.68185	-0.85544	-1.05708	-0.84625	-0.54982	-0.67532	-1.15442	-0.73512	-0.81482	-0.65108	-0.76544	-0.89398	-0.7687	-0.74261	-0.84134	-0.87332	-0.6486	-0.62822	-0.50061	-0.51816	-0.84405	-0.80382	-0.81026	-0.8498	-0.9192
YDR395W	1.82171	1.79281	2.02858	1.90852	1.97064	2.08939	2.15491	1.64928	2.24445	2.32353	2.24875	2.11489	2.08386	2.21626	2.4362	2.21866	2.52636	2.32548	1.96509	1.85534	1.98605	1.50464	1.78013	1.67183	1.82226	1.36732	1.99662	1.95797	1.97367	2.13988	2.15517	1.51312	1.4742	0.95177	2.12851	1.87051	1.75403	1.58304	1.81149	2.10437	2.0731	2.27511	1.78796	1.77957	2.05363	2.06017	2.17367	1.99679	2.21911
YGR129W	-0.52102	-0.62432	-0.31721	-0.69251	-0.25246	-0.6948	-0.65221	-0.32355	-0.76429	-0.53031	-0.68184	-0.31475	-0.91808	-1.56254	-1.25242	-0.8825	-1.25813	-0.65355	-0.54911	-0.39035	-0.97435	-0.60774	-0.81819	-0.20522	-0.85953	-0.81431	-0.76085	-0.72819	-0.43409	-0.74762	-0.73518	-0.48369	-0.72342	-0.12979	-0.43718	-0.55205	-0.75041	-0.20569	-0.7067	-0.83795	-0.32358	-0.74114	0.10409	-0.17043	-0.76338	-0.88382	-0.71193	-0.63252	-0.85528
YPR165W	3.40485	3.20594	3.46927	3.57061	3.47279	3.53074	3.84307	3.6515	4.09047	3.76075	3.89292	3.84603	3.76714	4.04771	4.15922	3.92609	4.22212	4.07591	3.61556	3.52511	3.76415	3.82683	3.62861	3.65401	3.61495	3.81839	3.78086	3.69064	3.5788	3.79187	3.98412	3.58918	3.32766	3.34816	3.9604	3.85997	3.69258	3.82537	3.83976	3.73977	3.53101	3.90584	3.64658	4.03368	3.75119	3.87143	4.08036	4.08624	4.04067
YAL069W	-1.91468	-3.6949	-2.15737	-2.94682	-2.09364	-2.42706	-4.03753	-3.19781	-4.27971	-4.61233	-4.16885	-4.40936	-4.38323	-3.98568	-4.36609	-4.95214	-3.94291	-4.08639	-4.40112	-3.51828	-4.15757	-4.47363	-2.75051	-1.63003	-3.83517	-4.37108	-3.23549	-2.85764	-3.11837	-2.34536	-3.70309	-2.708	-4.72563	-4.60636	-4.79505	-3.92892	-4.90924	-4.26742	-3.05311	-2.51313	-4.64765	-4.35695	-4.23419	-4.31181	-2.33453	-2.6383	-4.30324	-3.62939	-3.13275
YCL050C	2.45509	2.62232	2.76923	2.58413	2.51519	2.68621	2.95095	2.66331	2.78349	2.96012	2.79735	2.56949	2.52551	2.71672	2.67534	2.34567	2.83515	2.56031	2.93647	2.55469	2.87517	2.11194	2.56507	2.71193	2.34432	2.27567	2.37838	2.43272	2.98653	2.6426	2.63873	2.83424	2.99183	2.79424	3.42926	3.16959	2.26329	2.84017	2.90783	2.77024	2.62392	3.31088	2.75996	2.76475	2.57606	2.96178	2.93858	2.76051	2.93019
YPR098C	1.18768	1.55905	1.05582	1.36006	1.13807	1.50585	0.94352	1.26577	1.16051	1.21826	1.12634	1.14151	1.61563	1.42209	1.18057	1.5526	1.10516	1.39533	1.17613	1.2628	1.64871	1.95949	2.09207	1.09482	1.56342	2.31757	1.384	2.33237	1.22022	1.19122	2.25455	1.30042	0.97883	0.78102	1.49404	1.39711	1.23393	1.36791	1.85215	1.13562	1.16961	1.16688	1.22962	1.28165	1.50976	1.3243	1.36815	1.68684	1.42518
YPL015C	1.28076	1.50663	1.01985	1.39439	1.36519	1.67633	1.29104	1.39465	1.23727	1.65435	1.15743	1.68532	1.8283	1.85079	1.59557	1.27313	1.35956	1.51351	1.70525	1.25335	1.63826	1.97121	1.96772	1.26804	1.42996	2.21342	1.51045	2.49602	0.74952	0.87217	2.74452	1.99248	1.51441	1.58538	0.94242	1.22179	0.87786	1.58351	1.55109	1.37906	1.35109	1.60752	1.48961	1.74415	1.10528	0.74259	1.12252	1.72653	1.1251
YMR193W	-0.14791	-0.78119	-0.08815	-0.42177	0.13177	-0.41542	0.80901	1.29957	0.50757	0.64345	0.4234	0.43532	0.77139	0.75601	0.75111	0.41041	0.6865	1.24115	-0.3352	0.1005	-0.73445	-0.31446	-0.58947	0.32485	-0.88337	-0.93745	0.46185	-0.09056	-0.39938	-0.2169	-0.767	-0.29742	-0.83434	-1.95937	-0.13866	0.04529	-0.50245	-0.25237	-0.39849	-0.17526	0.2015	-0.02778	0.0627	-1.25446	0.00631	-0.26196	-0.06628	0.07182	0.24012
YLR031W	-3.99644	-4.52305	-4.08866	-4.33322	-4.29752	-4.42475	-4.15949	-4.48083	-4.19751	-4.47633	-4.16577	-4.50035	-4.31053	-4.38962	-4.58033	-4.52929	-4.32311	-4.61323	-3.17563	-3.31333	-3.31526	-3.78504	-3.9665	-3.98545	-2.98318	-3.03319	-3.27967	-4.4021	-3.43722	-4.01952	-4.26168	-5.14026	-2.99118	-3.736	-4.43241	-4.14571	-3.11336	-3.8411	-3.04028	-3.52475	-4.45637	-4.49082	-4.22502	-3.75355	-3.97563	-3.92652	-4.38732	-3.84421	-3.51754
YIL014C-A	-1.77343	-1.41046	-1.418	-1.6264	-1.65845	-0.89454	-4.75297	-4.33296	-4.54769	-4.77844	-4.13072	-3.20195	-2.75742	-3.34148	-3.02976	-2.77956	-3.03959	-2.25272	-1.5453	-1.57171	-2.40075	-2.42991	-4.5812	-4.36374	-4.3688	-4.67608	-4.94308	-4.03616	-1.72166	-1.27072	-3.79251	-4.99468	-4.31547	-4.12221	-2.72684	-2.68101	-1.71599	-1.9229	-4.2055	-4.38122	-2.49656	-2.42035	-4.32964	-4.19016	-4.04932	-1.54913	-2.00403	-2.11552	-1.88653
YGR053C	-3.40779	-3.92734	-3.43323	-3.58362	-3.14872	-3.70001	-3.7356	-3.49483	-3.85824	-3.75333	-3.79319	-3.64221	-4.09705	-4.13454	-3.84577	-4.14093	-3.83204	-3.96832	-3.52593	-3.82501	-3.26418	-3.78354	-3.45897	-3.89122	-3.22312	-3.5019	-2.88204	-3.7217	-3.42444	-3.43819	-3.60086	-3.86354	-3.90843	-4.18767	-3.76567	-4.09491	-3.22219	-3.2231	-3.72531	-3.93086	-2.90492	-3.29091	-3.37771	-4.63832	-3.24303	-3.37418	-3.16875	-2.83922	-2.87292
YCR101C	-1.44605	-1.13181	-1.34807	-1.31499	-1.37685	-1.42391	-1.37266	-1.53303	-1.30948	-1.58777	-1.36139	-1.20645	-3.38728	-3.42027	-3.59559	-2.93264	-3.48585	-3.48028	-1.39737	-1.72799	-1.66928	-1.65492	-1.77985	-1.31545	-1.49535	-1.65772	-1.5065	-1.63311	-1.88608	-2.30374	-0.86268	-1.5794	-1.1528	-2.02796	-1.70678	-1.54592	-1.67694	-1.46267	-1.81799	-2.43596	-2.29668	-2.00659	-1.17081	-1.44573	-1.80035	-1.82811	-2.18322	-1.59239	-1.76275
YER087C-B	3.73888	3.44682	3.47441	3.59293	3.31523	3.69062	4.11962	4.03634	3.70721	3.65977	3.79245	3.68723	4.33719	4.21096	4.03972	3.91055	4.03104	4.0582	3.98953	3.95375	3.95579	4.06483	4.09688	3.46212	3.44859	3.97677	3.72465	4.28723	3.67567	3.42514	4.12985	3.51869	3.8123	3.37194	3.7243	3.51587	4.01632	4.22099	4.07702	3.57142	3.61155	3.72988	3.21329	3.15975	3.93888	3.93212	4.01884	3.91084	3.69642
YOR280C	-0.38426	-0.2839	-0.17519	-0.28121	-0.31414	-0.2108	-0.38051	-0.20067	-0.24517	-0.28415	-0.50338	-0.34035	-0.33984	-0.54477	-0.47645	-0.38305	-0.41625	-0.67462	-0.64307	-0.31549	-0.19652	-0.26246	-0.25258	-0.47136	-0.43804	-0.11767	-0.16413	-0.22211	0.37813	-0.05463	-0.29129	-0.23431	-0.5327	-0.47448	-0.2241	-0.50991	-0.04528	-0.15402	-0.36794	-0.55443	-0.78286	-0.58079	-0.68483	-0.28989	-0.08047	-0.22939	-0.63656	-0.28336	-0.1561
YGR097W	1.20257	1.33823	1.28817	1.26436	0.96138	1.30781	0.92361	1.32102	1.45554	1.09646	1.39	1.09821	0.71083	0.91031	0.72999	0.48521	0.74476	0.63452	1.30888	1.30216	0.47447	0.65908	1.19744	0.92722	1.0342	1.32644	0.79257	1.34459	1.04745	1.16368	1.38962	1.50779	0.92414	0.85161	1.95008	1.71634	0.74425	0.87297	0.96388	0.7829	1.69292	1.84113	1.08249	1.29312	0.95328	1.12077	1.3135	1.53918	1.11558
YHR215W	3.98736	3.96173	4.41777	4.04345	3.87535	4.11027	0.15375	0.10711	0.55063	0.38747	0.26195	0.15344	-1.34782	-2.19798	-1.93853	-1.85953	-2.08756	-2.0658	4.95961	4.80993	3.89312	3.80018	1.78247	0.83145	2.91059	3.75696	3.96514	4.04267	6.51465	3.90589	4.70512	5.06059	1.76873	1.3124	5.85413	6.06639	0.71782	0.70202	0.95868	0.25	0.8301	0.19055	-0.26799	0.29822	0.37722	4.45988	0.87747	-0.02641	1.76535
YKL025C	0.27867	0.01806	0.26656	0.21113	0.10147	0.07068	0.16549	-0.15106	0.26668	-0.06631	0.23858	-0.2003	0.28679	0.01035	0.47879	0.05959	0.46756	0.19261	0.22707	0.1869	0.21814	-0.37256	0.13795	-0.08543	-0.00438	-0.38378	-0.02074	0.03445	-0.2725	0.18257	0.34897	-0.28915	-0.06248	-0.42534	0.52047	0.3571	0.05097	-0.47593	0.02458	0.13978	0.10383	0.40597	-0.30336	-0.17597	0.08045	-0.26448	0.03564	0.17176	0.21739
YKR011C	-1.30224	-1.02473	-1.39949	-1.09846	-1.32691	-1.33399	-1.52529	-0.67744	-1.02645	-1.42247	-1.28745	-1.48089	-1.36607	-1.29777	-1.13236	-0.86445	-0.97273	-0.79948	-1.75291	-0.98526	-0.84336	-0.5231	-1.4002	-1.83235	-0.49142	-0.30128	-0.89155	-0.81669	-0.89394	-1.19289	-1.77339	-0.93004	-1.00723	-1.094	-1.17132	-0.99208	-0.87312	-0.57984	-1.01426	-1.63011	-1.00395	-0.66882	-1.4482	-0.74457	-0.96614	-0.95967	-0.77792	-0.81906	-1.16524
YEL004W	-1.22002	-1.28142	-1.47011	-1.3183	-1.24808	-1.31982	-1.57842	-1.81975	-1.51978	-1.32542	-1.44315	-1.2724	-0.82204	-1.02858	-0.85653	-0.76	-0.91982	-0.9244	-0.93486	-1.40856	-1.5549	-1.65686	-0.81401	-1.52117	-1.74125	-1.56562	-1.63922	-1.35091	-1.84826	-1.74723	-0.6781	-1.75555	-1.51581	-1.57866	-1.43512	-1.76517	-1.54996	-1.85614	-1.54227	-1.47196	-1.6772	-1.60065	-1.55682	-1.77769	-1.39649	-1.71858	-1.44958	-1.41746	-1.39091
YJL200C	2.30944	2.27677	2.23108	2.20416	2.21439	2.36485	2.72782	2.44869	2.81141	3.0576	2.83608	2.84028	2.4964	2.51939	2.64004	1.70598	2.5388	2.37733	2.07487	1.75818	1.57863	0.84955	0.50417	0.81787	1.7529	0.77268	1.25874	1.11167	1.83829	2.01783	2.47983	1.91495	1.85612	1.0475	2.40641	2.07469	1.25103	0.80242	0.98893	1.53611	1.44148	1.58288	1.65357	0.89359	1.82979	2.3481	1.75258	1.90097	2.06652
YLL027W	0.95611	1.28015	1.07517	1.1236	0.83433	1.01147	0.98999	1.02652	1.12714	1.24477	1.08942	1.40407	0.55144	0.77748	0.61003	0.69446	0.74819	0.58984	0.9261	0.25316	1.18569	0.96123	0.66969	0.91346	1.01165	0.49339	0.81352	0.55435	0.81344	1.01983	1.18031	1.28541	1.37213	1.2315	1.31519	1.0898	1.06368	0.8692	1.10636	1.18143	0.83324	0.93952	0.91577	0.9497	1.05551	1.04412	0.75333	0.77098	0.76336
YOR024W	-5.09563	-4.53178	-4.87126	-4.73263	-4.75241	-4.45484	-4.95972	-4.85232	-4.59989	-4.58436	-4.78572	-4.50167	-5.11667	-4.63122	-4.44182	-4.93746	-4.12604	-4.19545	-4.74324	-4.71054	-4.99066	-4.70271	-4.38696	-4.89662	-4.77878	-4.92872	-4.51914	-4.62509	-4.86578	-4.65206	-4.35056	-4.89611	-4.38508	-4.33767	-4.68503	-4.87	-5.01999	-5.02976	-4.99158	-4.49661	-4.41038	-4.36964	-4.33667	-4.00752	-4.92965	-5.04312	-4.75523	-4.32711	-4.69093
YLR045C	0.19026	0.07467	0.4702	0.13536	0.3325	0.27223	0.11206	0.1666	-0.00234	-0.03937	0.07863	0.20638	-0.16705	-0.13952	-0.06565	-0.08663	-0.03454	0.11101	-0.1171	-0.10101	-0.24804	0.20645	-0.14422	0.19655	0.2403	0.17057	-0.00845	0.06027	0.51067	0.29554	-0.53882	0.36832	0.13123	0.28553	-0.1459	0.02971	0.15562	0.34915	0.07582	-0.08097	0.23254	0.14943	0.36389	0.4462	0.23404	0.20867	0.30513	-0.08242	0.20618
YDR348C	1.28647	1.13575	1.13588	1.21796	1.31065	1.03332	1.07886	1.5172	1.32072	1.45407	1.37235	1.40052	1.20185	1.51835	1.38943	1.31312	1.54547	1.18307	1.30099	1.22602	1.16033	1.20803	1.4358	1.45788	1.47691	1.54348	0.99809	0.98686	1.31853	1.10978	1.15904	1.35089	1.12745	1.40404	1.13554	1.27777	1.09959	1.36717	1.21722	1.42198	0.94259	1.11631	1.15964	0.93254	1.02076	1.31603	0.98923	1.15264	0.83273
YPL183C	0.70376	0.78591	1.01228	0.72071	0.97696	1.00237	1.00185	0.59014	1.07898	1.4083	1.14847	1.17782	1.0977	0.85124	1.17583	1.00173	1.13045	1.07727	0.80028	0.77607	0.77442	0.39596	0.81152	0.97146	0.37554	0.11556	0.7554	0.37886	0.54377	1.55617	1.11562	0.49266	0.39551	-0.24518	0.8092	0.77481	0.20781	-0.08644	0.89992	1.0095	0.85894	0.72581	0.71443	0.47769	1.04896	1.79375	0.78051	0.6523	0.81556
YGR003W	-0.73104	-0.67424	-0.60106	-0.79033	-0.56046	-0.56291	-0.53439	-0.9864	-0.62049	-0.54214	-0.55005	-0.50777	-0.69963	-0.91787	-0.62101	-0.62279	-0.82521	-0.68876	-1.15799	-1.04169	-0.719	-1.1768	-1.09817	-1.08181	-0.87927	-1.22005	-0.92274	-1.12713	-0.70312	-0.64034	-0.83472	-0.82967	-0.72596	-0.88287	-0.69605	-1.13929	-0.88074	-0.92516	-0.93462	-0.7788	-0.77223	-0.57509	-0.9732	-1.02374	-0.73735	-0.54727	-0.6464	-0.85336	-0.57286
YEL008C-A	-1.68391	-1.18719	-1.49961	-1.68522	-1.95425	-2.17671	-2.15417	-1.5639	-2.00469	-2.54953	-2.16794	-2.60257	-1.70539	-1.65874	-2.15448	-1.39684	-2.13373	-2.52737	-1.82694	-1.84547	-2.68392	-2.25824	-1.88916	-3.16955	-1.43055	-0.90353	-2.01716	-0.7928	-2.3672	-1.21908	-1.16767	-1.6175	-1.31239	-0.79902	-1.48604	-2.04517	-1.8774	-1.95271	-1.53458	-2.38304	-1.73144	-1.59781	-1.73461	-0.77582	-1.19841	-1.78379	-1.48706	-1.97584	-1.42032
YBL095W	-0.38959	-0.5196	-0.57631	-0.47263	-0.34705	-0.22516	0.18455	0.12392	-0.12098	0.0151	-0.02936	0.07901	-0.19798	-0.18882	0.03024	-0.24931	0.08415	-0.16971	-0.10006	-0.31331	0.20044	0.18493	-0.37868	-0.14905	-0.37926	-0.02672	-0.20755	0.23379	-0.116	-0.39948	-0.08736	-0.17387	-0.3904	-0.07627	-0.3726	-0.02425	-0.05207	0.2589	-0.52488	-0.17745	-0.62679	-0.30795	-0.38194	-0.15179	-0.0618	-0.54199	-0.40693	-0.64186	0.00178
YGL060W	-0.46268	-0.26345	-0.01459	-0.20114	-0.34169	-0.29147	0.8085	0.70504	1.15203	0.68647	0.88569	0.82719	-0.47496	-0.4193	-0.29285	-0.40179	-0.49018	-0.3534	1.11789	1.06593	0.93005	0.62257	-0.66549	-0.40195	-0.38329	-0.29784	-0.3403	-0.40848	0.96176	0.85695	-0.18302	-0.40012	0.68974	0.29303	1.02194	0.90423	0.93126	0.71909	-0.27938	-0.2384	-0.35958	-0.19599	0.67898	0.69001	0.70086	0.66128	0.85442	0.81643	1.05225
YLL007C	-1.38519	-1.51454	-1.44146	-1.4481	-1.55398	-1.63818	-1.52108	-1.60556	-1.20016	-1.38831	-1.2827	-1.52142	-1.34401	-1.53366	-1.20099	-1.34667	-1.32302	-1.43777	-1.41945	-1.72638	-1.02942	-1.77465	-1.53403	-1.76245	-1.42049	-1.77902	-1.34496	-1.52345	-1.62577	-1.51719	-1.31806	-1.66086	-1.32812	-1.98581	-1.13234	-1.62065	-1.43786	-1.58445	-1.42678	-1.71897	-1.41125	-1.28403	-1.41539	-1.64923	-1.35483	-1.44771	-1.42381	-1.62839	-1.24454
YEL009C	4.48438	4.2863	4.6949	4.28191	4.45878	4.49377	5.17459	4.8832	5.23736	5.11136	5.34309	4.98081	4.87257	4.88312	4.93636	4.99346	4.98033	5.09959	4.67572	4.5469	4.61049	4.22892	4.42811	4.43604	4.63405	4.12198	4.85102	4.94832	4.09845	4.80252	5.58541	4.3259	4.29611	4.3981	4.69613	4.58047	4.62459	4.23927	4.63639	4.64581	4.98316	5.07197	4.4683	4.73579	5.70616	5.13116	5.21876	5.01414	4.73388
YEL015W	1.0539	1.01115	1.14103	1.11469	1.30189	1.05353	0.97097	0.95721	0.99621	1.10404	1.25723	1.17972	0.80582	0.79873	0.81632	0.84925	0.84559	0.78818	0.85636	0.86379	0.86557	0.56082	0.71123	1.22678	1.09112	0.61996	1.15304	0.96353	0.92917	0.87017	0.39576	0.9572	0.88145	0.59458	0.97407	1.06822	0.91997	1.01244	0.68981	1.06863	1.17744	1.31103	1.08665	0.60279	1.39612	1.13989	1.2097	1.19619	1.44766
YOR083W	-0.98932	-0.92902	-0.93919	-0.83287	-1.06382	-1.28366	-0.75999	-0.55448	-0.75203	-0.77155	-0.87361	-0.3124	-1.32666	-1.30136	-1.31073	-1.48644	-1.43107	-1.56782	-0.53164	-0.62306	-0.57489	-0.65804	-0.40423	-1.22101	-0.34791	-0.64885	-0.88251	-0.69214	-0.61175	-0.62621	-0.11455	-0.18399	-0.46153	0.12716	-0.6961	-0.78497	-0.19012	-0.23481	-0.70474	-0.89806	-0.53165	-0.7383	-0.26649	0.4742	-1.1516	-1.01073	-0.25986	-0.8009	-1.02151
YBR252W	1.59713	1.78581	1.46946	1.60625	1.5055	1.51063	2.22791	1.84275	1.97405	1.94484	1.78862	2.09636	2.41113	2.56634	2.55249	2.69782	2.50342	2.19561	2.02682	1.73759	2.15052	1.79562	2.09796	2.14419	1.83963	2.17539	1.80482	1.52986	2.04557	1.24775	2.09615	1.76502	2.19749	2.11103	1.70305	1.76645	2.11247	2.25547	2.02436	2.11023	1.47654	1.53014	1.57121	2.27744	1.59977	1.81272	1.76048	1.65258	1.84327
YDR329C	0.13628	0.21451	-0.13132	-0.03048	0.03886	-0.08934	-0.12372	-0.10815	-0.19573	-0.12426	-0.15289	-0.21396	-0.13667	-0.30182	-0.24212	0.12401	-0.15229	-0.44856	-0.03018	-0.17845	-0.3316	-0.122	-0.46185	-0.29607	-0.05542	-0.21805	-0.02932	-0.11231	-0.23533	-0.13087	-0.66527	0.12698	0.07605	0.09233	-0.32307	-0.40848	0.07209	0.28262	-0.10822	-0.33691	-0.07721	0.08285	-0.31611	-0.56349	-0.02419	-0.31478	0.04576	0.0813	0.01563
YDL202W	0.31828	-0.10967	0.33471	0.35953	0.37371	0.24707	1.20626	1.47616	1.05742	1.16877	1.00607	1.34061	1.152	1.41523	1.32942	1.33744	1.0317	1.175	0.44814	0.30626	0.2768	0.56568	1.01994	0.79384	0.16357	0.04858	0.89223	0.58711	0.2209	0.65366	0.59345	1.04724	0.43104	0.76695	0.05727	0.33865	0.64812	0.61962	0.83789	0.63522	0.85346	0.6503	0.37187	0.65489	0.60433	0.31368	0.97238	0.87954	0.76656
YHR209W	-1.87872	-1.72019	-1.8233	-1.87511	-1.87485	-1.94008	-1.88152	-1.91699	-1.78753	-2.3656	-1.85619	-1.93277	-2.94594	-3.0661	-2.59428	-2.44983	-2.62469	-2.66817	-1.82243	-2.40046	-1.15526	-1.19698	-1.91782	-2.61894	-1.25234	-1.25135	-1.90365	-1.85176	-2.26345	-1.02773	-1.87999	-3.29083	-1.62011	-3.25016	-1.25269	-1.49395	-1.65869	-1.7131	-1.41738	-2.37141	-2.14896	-2.2702	-1.58323	-1.04149	-1.63757	-1.04188	-2.01152	-1.80145	-0.62325
YPR008W	0.21539	0.16568	0.42233	0.30081	0.35232	0.39388	0.48616	0.73435	0.53192	0.26862	0.41724	0.39655	0.06427	0.05033	0.19553	0.04973	-0.00128	0.06082	0.27033	0.6116	0.06465	0.41213	0.4064	0.9265	0.35339	0.61029	0.54739	0.75444	0.39797	0.45467	-0.07842	0.58106	0.39037	-0.0178	0.6995	0.82102	0.03756	0.4734	0.3572	0.96067	0.60537	0.11034	0.34034	0.44675	0.57547	0.51096	0.56436	0.56671	0.38433
YER075C	-0.32846	-0.28267	-0.25518	-0.36265	-0.26891	-0.37938	0.39355	0.24561	0.27315	0.14104	0.26067	0.24677	0.08779	0.16264	0.22828	0.09782	0.36716	0.16162	0.03196	-0.06183	0.5651	0.36918	0.39534	0.04358	0.65201	0.83321	0.27459	0.39109	0.05068	0.26553	0.40058	0.3628	0.39789	0.82049	0.19664	0.0979	0.5839	0.50173	0.61404	0.47925	0.0491	-0.24448	0.37778	0.48482	0.17895	-0.05066	0.06098	-0.05257	0.1755
YDL203C	0.04911	-0.07718	-0.03726	-0.08627	-0.07806	-0.02233	-0.1087	-0.19894	-0.09726	-0.17252	-0.08465	0.00606	-0.07446	0.08499	0.07439	-0.22474	0.00391	-0.03796	0.00651	0.00745	0.07527	0.01177	0.39892	0.40356	-0.12598	-0.13037	-0.08252	-0.33094	0.0349	-0.14856	-0.08533	-0.35799	0.38517	-0.56278	0.15213	0.05895	-0.12632	-0.17667	0.27196	0.3434	-0.05427	-0.1974	0.11162	0.08259	-0.16811	-0.20424	-0.19566	-0.36341	-0.16339
YBR050C	-2.87727	-2.77079	-2.60051	-2.6541	-2.62599	-3.29825	-3.92972	-3.49995	-3.92858	-4.24605	-3.75147	-3.99861	-4.25642	-4.32393	-4.14882	-4.25018	-4.03153	-4.19099	-2.33725	-2.45752	-2.72179	-2.80599	-3.17796	-3.66222	-3.069	-3.02923	-2.20098	-2.80314	-2.44426	-2.95567	-2.83874	-2.94862	-3.09076	-3.6071	-2.29208	-2.51258	-2.90378	-3.00927	-3.37731	-3.99144	-3.33571	-3.44747	-3.49476	-3.27682	-3.13079	-3.02512	-3.61598	-3.64723	-2.72145
YMR197C	-0.03014	-0.2506	0.01636	-0.20572	-0.04267	-0.54817	-0.01665	-0.35465	-0.26817	-0.21192	-0.4165	-0.09309	0.00854	-0.25386	-0.35388	-0.00636	-0.1294	-0.26528	-0.23428	-0.14193	-0.18876	0.11938	-0.18701	-0.46219	0.22089	-0.30688	0.2322	-0.23696	-0.13769	0.53492	-0.59321	-0.18719	-0.10052	0.50304	-0.15557	-0.39278	0.1086	0.03928	-0.44404	-0.69777	-0.05575	0.06353	-0.14863	-0.0636	0.17073	-0.0186	0.18439	0.10237	0.08072
YDR261W-A	2.853	3.86618	2.27614	3.87196	2.34793	3.46451	1.92019	2.56139	2.23561	2.18121	2.4176	2.09778	1.49013	1.50711	1.42498	-0.06296	1.30794	0.73443	3.51074	4.20327	2.41755	4.13716	4.69951	4.82209	4.63011	4.36496	3.8776	3.73292	4.63592	3.38595	2.26012	2.53165	5.49971	4.36859	3.82584	4.57414	4.56573	5.16805	5.49615	5.10172	3.67306	3.44929	4.89713	4.27646	1.55442	2.55784	2.61988	2.29454	2.58193
YDR134C	4.13526	3.92535	3.91267	4.24581	4.09722	4.12958	5.01813	5.18401	4.96528	5.16448	5.16429	5.19715	5.26938	5.43549	5.24305	5.19319	4.99679	4.82869	4.30258	3.97517	4.32371	4.81523	5.28516	5.27181	4.93411	5.26777	5.30391	5.2628	5.06964	4.3008	6.00945	5.10705	4.07927	4.53125	3.91354	4.17691	4.88642	4.97746	3.96655	4.56098	5.47553	5.68386	4.16946	3.88371	5.5861	4.42017	4.76232	5.24561	5.26365
YBL049W	-3.85563	-3.95752	-3.92787	-4.00295	-4.19036	-4.07429	-4.27863	-4.18618	-4.35271	-4.16563	-4.47227	-4.84584	-4.28671	-4.41747	-4.32137	-4.37159	-4.14458	-4.34627	-3.61912	-3.81185	-3.16039	-3.49061	-3.48491	-4.49963	-3.25419	-3.37863	-3.76294	-3.70085	-3.54485	-3.88267	-3.5296	-4.42989	-3.39329	-4.20993	-3.96348	-3.88734	-3.51108	-3.84265	-3.47475	-4.05002	-3.59225	-3.74091	-3.89195	-4.52582	-3.64566	-3.92817	-4.03999	-3.16097	-3.81815
YER054C	-3.03734	-3.65226	-3.19614	-3.08269	-3.06397	-3.70256	-3.42193	-2.96522	-3.27654	-3.53986	-2.92718	-3.55579	-3.79943	-4.19825	-4.09553	-4.57016	-3.99195	-4.40461	-2.79657	-3.33076	-2.99935	-3.08002	-3.19046	-3.17983	-2.81195	-3.20556	-2.61395	-3.01883	-3.35334	-3.0945	-3.79251	-3.7791	-3.63247	-3.29285	-3.63242	-3.71546	-2.60775	-2.61781	-3.42832	-3.45595	-3.08723	-3.04685	-3.1586	-3.47127	-3.17967	-3.07216	-2.9438	-2.44929	-2.94637
YDR305C	-0.45406	-0.59273	-0.24135	-0.43095	-0.22493	-0.44488	-0.02068	-0.2018	-0.16864	-0.27572	-0.33808	-0.21975	-0.01408	0.09353	-0.08815	-0.19838	0.02202	-0.23743	-0.7016	-0.57691	-0.28233	-0.32974	-0.39963	-0.44451	-0.40772	-0.24413	-0.47883	-0.30609	-0.651	-0.7964	-0.56487	-0.37485	-0.42521	0.18265	-0.88588	-0.44331	-0.22282	-0.18221	-0.30724	-0.16635	-0.56959	-0.50765	-0.84133	-0.47956	-0.15026	-0.88958	-0.1678	-0.59732	-0.53414
YHL019W-A	-3.81048	-4.08544	-3.91648	-4.08086	-4.08882	-4.32417	-4.33046	-4.32158	-4.33155	-4.37786	-4.00713	-4.08023	-3.80735	-3.87841	-3.80851	-4.25018	-4.27064	-4.06272	-3.77087	-3.77526	-4.74397	-4.24785	-3.88077	-4.18909	-3.81822	-3.89705	-5.03468	-4.50726	-4.18001	-3.85922	-4.31338	-3.82169	-4.68563	-3.6618	-3.82443	-3.8557	-4.32334	-4.23321	-3.78193	-3.94074	-4.61921	-4.38267	-4.85844	-4.71562	-4.60411	-4.19295	-3.74899	-4.83205	-4.46807
YNL201C	-0.0365	-0.0805	-0.02366	-0.13364	-0.05574	-0.09579	-0.15659	-0.30001	-0.0072	-0.00854	-0.05685	-0.26447	-0.41709	-0.38113	-0.18494	-0.2949	-0.37593	-0.29876	-0.04974	0.08848	-0.06504	-0.35355	-0.35343	0.0651	-0.03718	-0.5727	-0.4484	-0.4654	-0.34188	-0.16804	-0.52441	-0.37485	-0.34069	-0.32472	-0.12524	-0.14791	-0.3277	-0.30197	-0.00064	0.48665	0.0508	-0.31194	-0.07154	-0.64303	-0.0393	-0.00797	0.13064	-0.03965	-0.12274
YHR180W-A	2.3995	1.91338	2.51209	2.09753	2.07885	1.95224	2.88081	1.90172	2.3042	2.81171	2.25006	1.96044	3.29653	2.77427	2.95474	1.23245	1.16788	1.83191	2.61128	1.90445	2.76661	2.44063	2.12891	2.69274	1.53365	2.35849	2.90318	2.65423	1.1739	1.56167	2.68923	2.47679	2.11762	2.0981	3.00994	2.43786	2.85727	0.82487	2.1532	2.88441	1.92085	2.61906	2.06917	0.21176	0.92296	1.72048	-1.50261	1.71758	1.554
YCR061W	0.75415	0.74371	0.40901	0.67978	0.169	0.67742	0.72326	0.55424	0.49521	0.60949	0.56372	0.51434	0.82112	0.87129	0.61833	0.94759	0.86366	0.87836	0.3056	0.04705	0.93895	1.50396	1.15956	0.43959	-0.04478	0.7689	0.80149	1.83552	0.69995	0.66317	0.8971	0.16195	0.75554	0.86584	0.19792	0.15962	0.6624	0.49735	-0.09058	0.18932	0.78594	0.55413	0.91919	2.03263	0.47004	0.13144	0.88021	1.53819	0.36465
YBR206W	1.7075	1.30589	1.91007	1.66122	1.60711	1.62671	1.56295	1.25962	1.65552	1.60708	1.57685	1.62198	2.06918	2.0993	1.96296	1.7834	2.03414	1.70378	1.94152	1.72753	2.16527	1.89726	1.98615	1.8557	1.63402	1.87523	1.87627	1.19614	2.10382	1.54671	1.93833	1.29905	1.6651	1.15123	2.24121	1.64983	1.85327	2.00464	2.07212	1.68985	1.65253	1.84944	2.12807	1.32778	1.36427	1.87957	1.92915	1.72797	2.21613
YHR051W	1.84913	1.89906	2.06954	2.00197	2.2195	1.99928	3.2561	2.92381	3.3723	3.44784	3.31628	2.89685	4.07232	4.2449	4.13658	4.00622	4.06751	4.18109	2.11326	1.89556	2.91785	2.64758	2.82994	2.44292	1.42602	1.02962	2.89889	2.57385	1.68346	2.38605	2.83297	2.7313	1.44449	1.29818	1.85474	1.98867	2.14147	1.68037	2.13778	1.92868	2.99409	2.87528	1.63874	1.85327	2.43101	2.77717	2.64131	2.91527	2.81639
YDL116W	0.49488	0.35173	0.67386	0.55134	0.66543	0.60227	0.40808	0.3485	0.58712	0.62472	0.58562	0.43639	0.33609	0.32415	0.55692	0.37168	0.49762	0.38323	0.32828	0.31623	0.52364	0.01374	0.04322	0.39108	0.24755	0.05238	0.35716	0.30357	0.3547	0.48226	0.4219	-0.32516	-0.06336	-1.06262	0.59039	0.4962	0.17936	0.20835	0.15871	0.50985	0.52352	0.69871	0.29793	0.02385	0.57071	0.47453	0.52956	0.41085	0.58559
YPL171C	-4.08324	-3.46185	-4.14228	-3.78573	-4.02822	-3.89954	-3.85531	-3.58519	-3.80962	-4.04238	-4.123	-4.03129	-4.25642	-4.29089	-4.34022	-4.71083	-4.08997	-4.26226	-3.88947	-3.87155	-3.511	-3.92366	-3.82813	-4.40595	-4.31154	-4.06833	-3.43798	-2.97456	-4.00257	-3.67485	-2.15345	-3.35579	-3.50903	-3.17301	-3.9119	-3.99574	-4.41379	-4.06842	-3.89154	-3.64998	-3.84725	-3.7885	-3.47113	-3.97299	-3.95762	-3.59022	-4.22042	-3.95765	-3.78735
YPR124W	2.20073	2.49437	2.13769	2.26835	2.21715	2.08365	3.69166	3.52286	3.61284	3.74006	3.6437	3.42165	3.88176	3.73491	3.87964	1.46408	3.51078	3.70318	2.08558	2.41794	2.48306	2.17185	2.9591	2.82306	2.80827	2.45139	3.00367	2.61973	1.88492	3.08215	2.66447	3.30892	2.9806	3.12097	2.53218	2.42841	2.67172	2.48699	2.80822	1.69828	2.57995	3.11568	2.71087	2.36847	2.10619	2.80871	3.03834	2.8146	3.06604
YJL023C	-1.93964	-1.89874	-1.74676	-1.66214	-1.63058	-2.07149	-1.75721	-1.66515	-1.5524	-1.69889	-1.70965	-1.61389	-2.17097	-2.12255	-1.97147	-1.52755	-1.90004	-2.26695	-2.00791	-1.97499	-1.99019	-2.09642	-2.30444	-2.33271	-1.81401	-2.11648	-1.62974	-2.05172	-2.60542	-2.49271	-2.38593	-2.63804	-1.67231	-2.75841	-1.93419	-2.31157	-1.99711	-1.8278	-1.99231	-2.09889	-1.8065	-1.81257	-1.71581	-2.7483	-1.50141	-1.89903	-1.82457	-1.81305	-1.47729
YGL167C	2.24576	2.11175	2.14365	2.05827	2.18288	2.15766	2.30392	2.28943	2.3054	2.27593	2.27167	2.2228	2.57916	2.43247	2.55282	2.71784	2.47697	2.44075	2.35107	2.33	2.23202	2.14614	2.36925	1.85258	2.31901	2.34567	1.88243	2.12656	1.9415	2.00485	2.84011	2.05362	1.98361	1.93041	2.51689	2.34104	2.17381	2.31399	2.24212	2.11444	2.3813	2.3672	2.19709	2.10955	2.4964	2.13104	2.29307	2.20408	2.08711
YDL165W	0.68053	0.50828	0.42173	0.55127	0.52918	0.4773	0.41176	0.82548	0.52883	0.77265	0.40106	0.60938	0.90214	1.04321	0.80204	0.86849	1.05634	1.14811	0.54235	0.53258	0.60789	0.63269	0.58778	0.49119	0.382	0.71006	0.63867	0.56477	0.53575	0.95145	0.69619	0.00819	0.19487	0.44098	0.32688	0.38559	0.65248	0.80168	0.48937	0.61172	0.31085	0.52409	0.30914	0.83867	0.51343	0.41423	0.62608	0.49327	0.49488
YLR154C-H	-3.11791	-3.34833	-3.89901	-3.92474	-3.71082	-4.48237	-4.05178	-4.46667	-2.94902	-3.89202	-4.58353	-3.01201	-3.54723	-3.68712	-3.03202	-4.21773	-4.43086	-2.87094	-3.266	-3.98048	-3.34056	-4.13273	-4.36179	-3.21324	-3.72423	-4.60345	-3.43816	-3.60546	-3.0522	-4.01334	-2.79434	-3.657	-2.5508	-3.54148	-3.58093	-3.55938	-3.20095	-2.52166	-4.231	-3.41749	-3.63051	-4.17455	-2.99227	-3.44308	-4.22529	-3.32205	-3.89951	-3.75976	-3.24784
YIL143C	0.2645	0.39575	0.31741	0.31401	0.20113	0.34738	0.00234	-0.09724	0.15257	0.10228	0.2067	0.09784	0.15607	0.15625	0.22518	0.30118	0.11865	0.17031	0.15825	0.11857	0.08308	-0.07276	0.00205	-0.11474	-0.11513	-0.42301	0.03017	-0.16852	0.088	0.32778	0.06212	-0.05804	0.34429	-0.07516	0.47246	0.24719	-0.08291	-0.22861	0.12384	0.32029	0.20535	0.36591	0.10226	-0.26465	0.02728	0.28434	0.21821	0.07244	0.09087
YPL119C-A	-1.76087	-1.9184	-1.7955	-1.6863	-1.59615	-2.10112	-2.47515	-1.62597	-2.36931	-2.56701	-2.2278	-2.49104	-3.58177	-3.94797	-3.61366	-4.4245	-3.52878	-3.53499	-2.00212	-1.72256	-2.48698	-2.22129	-1.97715	-2.78073	-2.68191	-1.80186	-2.06388	-1.76115	-1.93965	-1.7711	-1.48767	-2.47133	-1.83523	-3.51887	-1.84149	-1.86522	-1.99914	-2.34435	-2.04499	-2.39182	-1.70025	-2.21435	-2.43724	-3.09701	-1.6793	-1.19788	-2.65196	-1.38374	-1.87405
YBR292C	-2.99151	-3.40773	-3.29915	-3.30439	-3.0773	-3.47384	-2.85854	-3.28733	-3.09354	-3.67173	-3.13423	-2.69538	-3.11025	-2.83297	-3.01793	-2.72846	-2.85556	-2.65149	-3.10526	-2.97884	-3.7058	-3.22711	-3.13286	-2.77939	-3.21855	-3.31223	-3.56905	-2.98179	-2.81168	-3.29636	-1.96329	-2.45697	-2.42548	-1.8643	-3.29683	-3.28977	-3.33954	-3.29672	-3.0732	-2.68737	-3.36242	-3.01075	-3.64261	-3.11747	-3.64518	-2.99489	-3.26614	-3.38046	-3.07887
YGR240C	4.19887	4.30404	4.14443	4.03002	4.16073	4.29814	4.40673	4.17221	4.38917	4.56835	4.42971	4.39948	4.6736	4.62229	4.41721	4.68422	4.70334	4.89415	4.42195	4.22993	4.16338	3.8832	4.22868	4.04607	4.20457	4.11942	4.14932	4.4776	4.19434	4.38765	5.31463	4.55787	4.07343	4.60252	4.31527	4.21976	4.12296	3.96937	4.19865	4.13426	4.34516	4.41554	4.15817	4.58017	4.83097	4.46034	4.54341	4.49105	4.34374
YOR094W	0.27898	0.23992	0.1865	0.08677	0.29539	0.26372	0.01919	0.19688	0.10319	-0.09694	0.15371	0.04381	0.42708	0.40735	0.15058	0.05842	0.49579	0.71475	-0.21013	-0.11851	-0.54045	-0.10445	-0.46269	0.29665	0.00516	-0.15291	-0.33494	-0.22351	0.19583	-0.35732	-0.62189	-0.28846	0.0133	-0.80879	-0.22017	0.18629	-0.3412	0.18818	0.12584	0.42273	-0.16565	0.08626	0.07178	-0.22845	0.27106	0.08399	-0.01485	-0.06352	0.30385
YDR167W	0.24436	0.419	0.37785	0.32133	0.59179	0.16989	0.39289	0.65821	0.26098	0.44328	0.42462	0.39711	0.46636	0.43212	0.6175	0.89139	0.7951	0.88373	0.12062	0.15303	0.12502	0.59578	-0.11587	0.59911	0.58352	0.31618	0.66224	0.17434	0.49292	0.34101	-0.22393	0.96831	0.8676	1.38433	0.32296	0.46864	0.79823	0.92354	0.5134	0.34836	0.37935	0.52075	0.4073	0.94838	0.29331	0.58848	0.60723	0.15043	0.53386
YBR063C	-0.76622	-0.5652	-0.68277	-0.61225	-0.55384	-0.61713	-0.48979	-0.74939	-0.47653	-0.38821	-0.57193	-0.49688	-0.78224	-0.96463	-0.61054	-0.72841	-0.58647	-0.75783	-0.51625	-0.69985	-0.47441	-1.1468	-1.18187	-0.77633	-0.48616	-1.10165	-0.59787	-1.18795	-0.78403	-0.56866	-0.9687	-0.4771	-0.23519	-0.9449	-0.86971	-0.84291	-0.85887	-0.95206	-0.7804	-0.60687	-0.28621	-0.65905	-0.1416	-1.03889	-0.67797	-0.37418	-0.14422	-0.36222	-0.35591
YER052C	2.39571	2.13175	2.2171	2.43695	2.33938	2.40639	3.36691	3.16943	3.30321	3.53177	3.19767	3.36918	2.76242	2.77841	2.64608	2.5792	2.9467	2.68598	2.81541	2.59882	2.18622	2.21641	2.64655	2.04609	2.84704	2.83046	2.26108	2.68972	2.46634	2.25887	4.94553	3.28089	2.21188	2.15701	2.68242	2.71089	2.59414	2.56405	2.58167	2.31709	3.43021	2.87046	2.54625	2.61413	2.48043	2.20043	2.59783	2.81487	2.0999
YPL118W	0.74202	0.83825	1.02812	0.82569	0.97747	0.88584	1.31993	1.58697	1.4505	1.7528	1.54374	1.75573	1.71039	1.76351	1.72324	1.60165	1.5186	1.88967	0.86284	0.6211	1.0779	1.14498	1.48354	1.18191	0.94546	0.60995	1.57431	1.25711	0.87632	2.01646	1.20932	1.26535	1.01171	0.5541	0.80629	0.95404	1.14619	1.24586	1.08542	0.99437	1.60526	1.47704	1.05138	0.69141	1.35719	2.35552	1.53891	1.43985	1.44336
YGR178C	2.06938	2.22505	2.12507	2.18565	2.09551	2.12435	2.54795	2.44384	2.50622	2.51927	2.65539	2.55879	2.14644	2.32161	2.25831	2.14325	2.27949	2.25123	2.14665	2.37055	2.07662	2.15116	2.24325	2.30541	2.34839	2.28476	2.21033	2.4074	2.01858	2.06431	2.0895	2.56985	2.19154	2.5955	2.5666	2.29253	1.94363	1.88056	2.31201	2.41703	2.20932	2.3383	2.10614	1.56915	2.24372	1.98358	2.2131	2.30771	1.93427
YPR187W	2.91847	2.97857	3.4325	2.99084	3.10893	3.19531	3.96535	4.00006	3.93078	3.73914	3.92784	3.79304	3.75073	3.93048	3.93191	3.42965	4.01522	4.33073	3.46015	3.37861	3.43128	3.22198	2.98685	3.83197	3.17076	3.14138	3.82166	3.15812	3.62368	3.45248	2.96728	3.34945	3.27391	2.85141	3.56987	3.71186	3.26193	3.67718	3.18637	3.57097	3.52836	3.66311	3.22983	3.04455	3.45315	3.72401	3.55139	3.38862	3.94219
YOL141W	-0.86261	-0.97412	-0.81516	-0.99879	-0.94675	-0.87354	-0.40628	-0.48006	-0.31737	-0.35935	-0.21931	-0.05739	-0.75193	-0.63029	-0.41855	-0.71127	-0.65087	-0.83242	-0.46269	-0.85825	-0.36488	-1.06083	-0.48031	-0.23849	-1.04968	-1.25776	-0.81962	-0.84001	-0.80879	-0.74224	-0.22225	-0.26268	-0.29418	-0.03741	-0.44277	-0.96337	-0.89096	-1.16555	-0.59174	-0.22973	-0.62613	-0.65024	-0.449	-0.14531	-1.06701	-0.59297	-0.66142	-0.97957	-0.47656
YJL065C	0.71515	1.00199	0.81168	0.90543	0.76633	0.93496	0.91877	1.36825	0.96576	1.09865	0.88649	0.95401	1.07417	1.02109	0.98701	0.99077	1.15609	0.73932	0.77907	0.67675	1.27324	1.15349	0.85834	1.21943	1.0037	1.25878	0.97676	0.86002	0.64343	0.85728	1.05195	1.0793	1.15726	2.04001	0.61731	0.53151	1.18877	1.506	0.98985	1.05848	0.66908	0.83537	1.08846	1.59126	1.24732	0.76676	0.92193	0.66055	0.83597
YPR086W	1.35064	1.30523	1.42367	1.41186	1.36828	1.21244	1.51698	1.90371	1.43922	1.56649	1.4983	1.67408	0.99861	1.40156	1.42013	1.27955	1.30492	1.47563	0.9861	1.40646	0.77021	1.24326	0.71615	1.3314	1.27377	1.1618	1.1241	0.63736	1.34736	0.89765	0.6833	1.40842	1.29094	1.42913	1.10475	1.2194	1.0567	1.32483	1.10014	1.34928	1.44116	1.5779	0.92504	1.28352	1.44797	1.26884	1.78043	1.41442	1.10631
YBR122C	0.93014	0.68793	1.15645	0.88264	1.08926	1.24212	1.80631	2.11128	1.78338	1.78874	1.81879	1.68868	2.15565	2.27346	2.37492	1.6646	2.2918	2.24967	0.89764	1.34221	1.17047	1.31498	1.34271	1.81661	0.83014	0.93398	1.48421	1.25586	0.82615	0.4146	1.15178	0.53672	0.46946	-0.21285	1.06858	1.17965	0.63295	0.94074	0.99807	1.29193	1.68965	1.44742	0.79632	0.45775	1.07375	0.97117	1.12364	1.56984	1.65816
YBR271W	0.25624	-0.14991	0.45571	0.3045	0.44424	0.31547	0.19499	-0.07597	0.18657	0.30565	0.23109	0.24821	0.34929	0.05024	0.32014	0.32839	0.36649	0.21529	-0.00084	0.13114	-0.42743	-0.78039	-0.18652	0.37455	-0.44987	-0.63716	-0.05631	-0.786	0.06914	0.11575	0.20367	-0.22477	-0.08894	-0.89432	0.37871	0.38811	-0.54327	-0.84828	0.40168	0.78689	0.35285	0.49118	0.4189	-0.15727	-0.40625	0.20097	-0.12036	-0.14656	0.51255
YBR279W	0.80754	0.57078	1.00106	0.6176	0.96688	0.73512	0.94081	0.92687	0.54451	0.8543	0.72111	0.81659	0.43265	0.34817	0.478	0.62152	0.4427	0.84294	0.46765	0.8151	-0.05455	0.38365	0.04178	0.8451	0.42784	0.11484	0.5482	0.21754	0.81509	0.69234	-0.44219	0.70485	0.24008	0.04252	0.44947	0.85602	0.30955	0.49499	0.56111	0.58033	0.81881	0.76082	0.59592	0.59336	0.81955	0.83211	0.71556	0.81914	0.33959
YHR095W	-4.27333	-1.34463	-4.21164	-4.03136	-3.79338	-4.32652	-4.06919	-3.85368	-4.64916	-4.32727	-4.64791	-3.79656	-4.60904	-4.49818	-4.43172	-4.65345	-4.71557	-4.38548	-4.16025	-4.17798	-4.19757	-4.26738	-4.60509	-4.18809	-4.10772	-3.65445	-4.02886	-3.5382	-2.67824	-4.17326	-4.14868	-4.17576	-3.79378	-3.71117	-4.22738	-3.62378	-3.93344	-4.25651	-4.20922	-3.90177	-3.88586	-4.39155	-4.45694	-3.7028	-4.0951	-3.56568	-4.75993	-4.55746	-4.18581
YMR221C	1.48554	1.18628	1.13519	1.24143	1.31728	1.4879	1.17623	0.82877	1.14789	1.27528	1.21738	1.10205	2.28969	2.0699	1.7983	1.7119	1.89918	1.6328	1.4603	1.2903	1.46035	1.70601	1.79681	1.04212	0.96863	1.36486	0.98672	1.71799	1.09535	1.30462	2.32276	0.94224	0.67485	0.99523	1.23802	1.12883	1.13321	0.70454	1.45886	0.98295	1.11534	1.36202	1.10059	1.19767	1.19341	1.06943	1.38324	1.4757	1.0313
YJL221C	-2.63237	-2.40034	-2.2434	-2.22001	-2.14177	-2.65637	-2.39509	-2.47935	-2.47855	-2.6094	-2.14136	-2.35333	-3.08818	-3.41873	-3.52961	-3.07191	-3.13339	-3.60975	-2.2683	-2.21062	-2.53899	-2.76732	-2.49578	-2.64422	-2.51553	-3.13456	-2.68793	-3.15766	-2.59817	-2.07737	-2.25991	-3.16149	-2.57721	-3.29285	-2.2416	-2.37334	-2.7039	-2.60517	-2.96259	-3.23006	-2.36738	-2.49027	-2.69975	-3.86344	-2.26261	-2.0766	-3.1233	-2.6136	-2.23174
YDR241W	-3.9698	-4.52253	-3.72854	-3.76691	-3.54171	-4.07993	-3.94072	-3.86693	-3.75917	-2.90942	-4.16591	-4.8396	-4.21005	-4.15597	-3.9531	-4.10655	-3.11716	-4.4386	-3.64672	-4.15833	-3.7669	-4.3325	-4.00103	-4.19026	-3.67779	-4.41934	-3.80181	-4.3333	-4.61418	-4.38256	-3.43031	-5.08624	-4.29147	-4.10378	-3.85932	-4.37586	-3.61294	-4.81086	-3.99916	-3.9819	-3.50607	-4.05435	-3.57082	-4.88993	-3.42758	-4.27446	-4.14119	-3.87117	-3.63088
YER130C	-0.06289	-0.27004	-0.3705	-0.17386	0.09178	0.00447	-0.40192	-0.60425	-0.52233	-0.64561	-0.53418	-0.51849	-0.56515	-0.44745	-0.36172	-0.19197	-0.24619	-0.22534	-0.53598	-0.706	0.2911	-0.64331	-0.70278	-0.62502	0.15312	-0.34703	-0.4926	-0.96857	-0.33575	-0.41246	-0.87541	0.18518	-0.70117	-0.21601	-0.49603	-0.32824	0.27945	0.07819	-0.14915	-0.06706	-0.12438	-0.58639	-0.40508	-0.17051	-0.23591	-0.2934	-0.08919	-0.49106	-0.12476
YBR155W	0.97528	0.75057	1.07086	0.7985	1.1652	0.835	1.15658	1.46217	0.72435	1.03035	0.89078	1.0914	0.62887	0.43287	0.35873	0.29977	0.52463	0.76329	1.10953	1.2933	-0.10532	0.10747	-0.15299	1.32989	0.54206	-0.10882	0.50987	-0.33795	1.20144	0.73577	-0.19985	0.71371	0.50865	0.69144	0.78766	1.21124	0.08138	0.42185	0.40176	1.00547	1.13349	0.66224	1.46767	0.48233	0.68598	0.90414	1.21416	0.95739	0.78888
YDR363W	-0.80287	-0.96038	-0.48512	-0.6024	-0.51823	-0.81958	-0.61834	-0.28811	-0.54198	-0.66363	-0.62419	-0.45503	-1.26332	-1.1643	-1.34608	-1.21857	-0.90927	-1.52002	-0.52586	-0.54343	-0.78619	-0.8123	-1.0308	-0.29499	-0.84819	-1.17499	-0.54253	-0.80352	-0.87741	-0.55302	-0.90252	-0.58131	-0.44408	-1.08915	-0.77608	-0.60574	-0.74278	-0.48333	-0.7275	-0.53443	-0.14923	-0.61981	-0.30029	-0.81145	-0.62401	-0.56262	-0.58849	-0.57284	-0.32724
YPL147W	-3.27848	-3.28838	-2.96567	-3.00317	-3.0276	-3.27476	-2.73039	-2.90556	-2.84947	-3.19451	-2.97427	-2.77221	-3.36131	-3.40375	-3.14058	-3.54895	-3.22512	-3.37408	-2.98998	-2.78191	-2.87752	-3.02306	-3.01428	-3.10803	-2.80589	-3.05418	-2.98211	-3.25003	-3.29309	-2.12668	-3.01793	-3.99453	-3.69929	-3.96494	-3.10596	-3.19442	-2.92312	-3.20111	-3.2131	-3.25766	-2.70927	-2.75471	-2.96074	-3.48799	-2.79579	-2.05282	-3.27968	-3.0545	-2.74493
YGR266W	0.3018	0.30971	0.36709	0.31615	0.46791	0.49825	0.54044	0.29977	0.5799	0.57028	0.52876	0.23587	0.55248	0.86836	0.86416	0.78779	0.81862	0.92586	-0.16228	-0.07678	0.61029	0.31529	0.13317	0.04294	-0.16574	0.01442	0.70402	0.71732	0.2675	0.38739	0.24126	-0.13203	0.14659	-0.23488	0.37268	0.30023	0.14786	0.26255	-0.28067	-0.10099	0.55623	0.62585	0.52617	0.59161	0.69463	0.48456	0.63395	0.70602	0.90241
YLR443W	-0.1342	-0.27971	-0.39701	-0.33334	-0.42789	-0.25339	-0.23071	-0.55824	-0.31995	-0.11384	-0.23881	-0.11754	0.2059	0.00564	-0.15354	-0.26073	0.11293	-0.10952	-0.29291	-0.53016	-0.43946	-0.4374	0.28399	-0.4868	-0.23216	-0.24882	-0.62564	-0.24413	-0.57537	-0.22661	0.63701	-0.01836	-0.37673	-0.12123	-0.18544	-0.32316	-0.24814	-0.60665	-0.04445	-0.23175	-0.1876	-0.10639	-0.14796	-0.12575	-0.64687	-0.46285	-0.33054	-0.3132	-0.9192
YAL034C	-0.04367	-0.16136	-0.0663	-0.06445	-0.28446	-0.15983	0.05025	0.19326	-0.01269	-0.15512	0.00816	-0.08682	-0.07538	-0.13443	-0.22844	-0.40179	-0.06881	-0.46906	0.30025	-0.08093	0.15997	0.13605	0.22564	0.1297	0.08284	0.29098	-0.27696	-0.06938	-0.08761	0.09781	0.08004	0.05685	-0.14516	-0.46889	0.08649	-0.21722	-0.25827	-0.06816	0.13836	0.33678	-0.13961	-0.41645	-0.18184	-0.43528	-0.45451	-0.28868	-0.24453	-0.03815	-0.03819
YBR067C	3.85	3.91392	3.63726	4.14286	3.96168	4.18617	2.01849	1.5682	1.56224	1.89384	1.91559	1.86758	-0.24817	-0.71437	-0.77202	-1.54879	-0.4731	-1.80352	3.52054	3.46254	4.23532	4.27389	2.64671	2.93568	2.29753	3.78972	3.26336	4.14043	3.08422	2.52245	3.36321	3.86231	4.43895	5.6643	2.18986	2.41119	2.75016	3.00008	2.72232	3.02191	2.29015	3.15773	3.4663	4.45751	1.73805	2.56211	4.16003	4.43175	3.35264
YCR095C	-0.40362	-0.82362	-0.21817	-0.53897	-0.22493	-0.58129	-0.51884	-0.3572	-0.30837	-0.57594	-0.45273	-0.45859	-0.21293	-0.36978	-0.30967	-0.37634	-0.25047	-0.22366	-1.19014	-0.63062	-0.66931	-0.80194	-1.07407	-0.72905	-0.69793	-1.17633	-0.64609	-0.71267	-0.80942	-1.09962	-0.88821	-1.57765	-0.81672	-1.29522	-0.63821	-0.49082	-0.89021	-0.89116	-0.99772	-0.73456	-0.35275	-0.39278	-0.56905	-0.99091	-0.31114	-0.88743	-0.53176	-0.30345	-0.51199
YLR270W	-0.37309	-0.16053	-0.4	-0.15487	-0.38406	-0.34222	0.02827	-0.32702	0.13898	0.13468	0.29058	-0.0876	-0.12845	0.04092	0.04673	0.28416	0.08049	0.14828	-0.55558	-1.08891	0.72907	0.55505	-0.34493	-0.4388	0.20496	-0.22963	0.62872	0.2254	-0.0298	-0.02619	-0.61418	-0.82691	-0.15443	-0.46524	-0.79905	-0.69667	-0.2508	-0.15371	-0.27549	-0.37465	0.16807	0.39334	-0.07645	-0.05219	0.40525	0.42756	0.29121	0.58859	0.54684
YPR084W	-0.03398	-0.21419	0.01222	-0.14381	-0.07714	-0.0356	-0.17343	-0.07489	-0.02459	-0.10604	-0.20407	-0.12966	0.11759	0.01806	-0.19987	-0.22512	-0.25686	-0.47015	-0.05665	-0.17098	0.03154	0.09203	0.21922	0.06737	-0.37067	0.10056	-0.11381	0.0498	-0.34703	-0.04769	0.12452	-0.0309	-0.17415	0.20284	-0.14635	-0.23643	-0.11668	-0.28926	-0.08664	0.077	-0.44051	-0.31687	-0.05605	-0.03717	-0.19691	-0.43428	-0.4342	-0.09497	-0.23369
YBR184W	-3.15143	-3.21755	-2.74654	-2.93399	-2.78252	-3.25997	-3.15021	-3.10702	-3.03143	-3.28862	-3.02445	-3.31588	-3.56454	-3.58067	-3.27612	-3.74772	-3.25097	-3.42939	-3.00019	-3.1127	-3.01218	-3.15805	-3.403	-3.29738	-2.49113	-3.46739	-2.644	-3.29979	-3.37723	-3.16657	-3.72948	-3.59879	-2.78654	-3.75384	-3.86101	-3.58373	-2.61264	-2.82084	-2.99378	-3.05127	-2.75395	-2.92184	-2.96058	-3.1995	-2.62304	-3.21633	-3.24668	-2.83788	-2.51345
YMR113W	-0.86094	-0.46887	-0.31322	-0.45719	-0.62254	-0.82729	-0.32519	-0.87643	-0.26193	-0.64962	-0.41688	-0.45286	-0.66833	-0.85197	-0.57163	-0.73441	-0.64118	-0.65562	-0.65375	-0.48671	-0.16097	-0.32118	-0.31148	-0.83496	-0.56482	-0.14675	-0.10455	-0.66043	-0.22854	-0.3757	-0.44697	-0.23505	-0.13673	-0.02432	-0.28328	-0.34386	-0.29509	-0.80661	-0.65075	-0.97071	-0.66754	-0.46976	-0.27688	-0.22002	-0.34032	-0.39428	-0.52221	-0.60554	-0.60132
YGR035C	0.55951	0.51599	0.48172	0.27086	0.30587	0.35897	0.10669	-0.03293	0.36007	0.10573	0.31301	0.30395	0.92723	0.67159	0.98596	0.82985	1.03387	1.0071	0.42288	0.33538	-0.96466	-0.55682	-0.29795	0.75497	-0.66011	-0.91379	-1.04059	-1.05864	1.34886	0.78591	-0.9864	0.07037	0.63932	1.07655	0.33779	0.4575	0.73846	0.97582	0.05252	-0.10415	-0.84994	-0.39864	0.31447	0.79969	0.90654	1.37369	-0.45961	-1.1195	0.55396
YDL222C	-1.63039	-1.96893	-2.13773	-1.74028	-2.19899	-2.34218	-2.0927	-1.81176	-2.04608	-1.62881	-1.45815	-1.58583	-1.54555	-2.35261	-1.87548	-1.72621	-2.3185	-2.34013	-1.62305	-2.09893	-1.92566	-0.92224	-1.36381	-1.68086	-1.86011	-1.32018	-2.01716	-1.36542	-2.42209	-1.96587	-1.36049	-1.15709	-1.56574	-0.62718	-1.66511	-1.90448	-2.12085	-1.84586	-1.84539	-1.96773	-1.86757	-1.99547	-1.87527	-0.62953	-2.15916	-1.7706	-1.88385	-0.59023	-2.41378
YCL008C	0.77936	0.96228	0.71108	0.87586	0.5791	0.72235	1.01005	1.03981	1.20267	1.0544	1.17439	1.34672	0.96619	1.12501	0.83373	0.69331	0.71743	0.64686	1.14955	0.67245	1.06712	1.01637	1.40681	1.24072	0.90948	1.00761	1.00353	1.07119	1.0147	1.03435	1.73542	1.21357	1.43549	1.23605	1.17197	0.90687	1.05512	1.20652	1.02441	1.25252	0.96902	0.79194	1.13998	1.37776	0.70998	1.07623	1.05291	0.78184	1.08892
YEL065W	1.19057	1.09651	1.27318	0.81119	1.21115	1.07546	2.92611	3.41982	3.57666	2.97601	2.4436	3.32405	2.70465	2.93787	2.59789	2.77247	2.66266	2.57227	2.31922	3.11393	2.37076	2.64835	2.96845	2.30567	4.00984	4.29492	3.70916	3.57382	2.12315	3.39646	3.60206	2.58604	2.16032	2.2349	1.94498	2.29341	3.48156	3.71016	3.04239	1.46828	3.21775	2.75033	4.24972	3.37691	2.73849	2.76164	2.80911	2.49183	1.83649
YNL335W	-2.71279	-2.30627	-2.86893	-2.88398	-3.04523	-3.07967	-2.86707	-2.81868	-2.74526	-3.01036	-2.91757	-2.75302	-2.82754	-2.72411	-3.15169	-2.46076	-2.97062	-3.0525	-2.37801	-2.70714	-3.38685	-3.22506	-2.31501	-3.31918	-3.11882	-3.02618	-3.2193	-3.10024	-3.87202	-3.21552	-1.61888	-2.33844	-3.01765	-3.31928	-2.53512	-2.89803	-4.37225	-3.8713	-2.88587	-3.38471	-3.35946	-3.55098	-2.29263	-2.50583	-3.07269	-3.19374	-2.41732	-1.81336	-3.06193
YMR296C	2.88617	2.68508	2.62681	2.77025	2.60517	2.80261	2.97993	3.26319	2.86726	3.05828	3.04578	3.19239	3.35397	3.42016	3.14403	2.97465	3.11693	2.97934	3.42979	3.14747	3.06627	3.07337	3.34386	3.24916	2.71891	2.90492	2.71578	2.87461	2.89256	2.94141	3.39743	2.85189	3.18846	2.7136	2.97061	3.02418	2.93408	3.13239	3.25344	3.27603	2.92457	2.65476	2.9226	3.20218	2.73143	2.86879	3.10624	2.86241	2.81834
YDR232W	2.94609	2.67633	2.80195	2.76407	2.90849	2.77776	3.90031	3.48654	3.33252	3.67692	3.65619	3.83057	4.00924	3.73645	3.74155	3.94682	3.79458	3.88441	3.76158	3.36478	3.12442	3.04088	3.60697	3.20948	2.80733	2.84135	3.15285	3.53321	3.21965	3.28614	4.80245	3.99058	3.45539	3.3775	3.70434	3.50175	3.1527	2.97171	3.21641	3.22725	3.51133	3.34303	3.44448	3.26581	3.10296	3.06307	3.46156	3.25847	3.17792
YGR190C	-4.28044	-5.08804	-3.99731	-4.37283	-4.26932	-3.75404	-3.76275	-4.79543	-4.24426	-4.11411	-3.98738	-4.23721	-4.25044	-4.12689	-3.94869	-3.98123	-2.75285	-4.5007	-4.54873	-4.17675	-3.27768	-4.20422	-3.81322	-4.33671	-4.29798	-4.06161	-3.93311	-5.19871	-5.32236	0.53022	-4.5218	-4.76601	-4.74933	-2.9472	-4.78823	-4.20141	-4.04563	-4.39782	-5.01085	-4.48901	-4.44115	-4.26014	-4.87772	-4.7449	-4.68829	-4.33986	-4.02199	-4.30028	-4.52281
YHR116W	-0.60726	-0.42174	-0.51192	-0.42724	-0.64582	-0.7073	0.23024	0.70476	0.38249	0.70661	0.25315	0.46425	0.88595	1.14964	0.99559	0.71577	0.81146	0.98255	-0.14469	-0.71026	0.12787	0.09841	0.38157	0.06652	-0.60534	-0.42635	0.65519	0.28716	-0.33968	0.15037	0.15516	0.52078	0.04751	0.23506	-0.47487	-0.36545	-0.01766	0.33935	-0.24365	-0.15331	0.26994	0.2087	-0.26848	0.45606	-0.34419	0.00471	0.27113	-0.16429	0.43521
YDR313C	-0.08824	-0.45174	-0.30684	-0.06598	-0.322	-0.18236	-0.44051	-0.02932	-0.04392	-0.26766	-0.19935	-0.30856	0.10163	0.28223	0.16275	0.04627	0.04548	-0.00212	-0.25105	-0.183	-0.22022	-0.19389	0.11801	0.06875	-0.59455	-0.00258	-0.05345	0.07202	-0.50141	-0.2741	0.20881	-0.03887	-0.27372	0.15046	-0.13408	-0.33107	-0.14476	-0.11857	-0.18553	-0.18054	-0.33691	-0.20682	-0.38441	-0.08262	-0.1538	-0.32079	-0.39854	-0.18727	-0.3462
YFR018C	1.09343	0.94822	0.72823	0.90614	0.80822	0.86965	0.60736	0.32928	0.46196	0.52076	0.46147	0.85291	0.93816	0.8279	0.68031	1.15988	0.68437	0.86664	1.2852	1.01723	0.7259	0.81025	1.32101	0.61602	0.80084	1.00617	0.03143	0.72357	0.92984	0.54814	1.55265	1.55643	1.25376	1.90059	0.83789	0.93736	0.53067	0.61943	0.90521	0.60627	0.81568	0.80399	0.91196	1.95632	0.23929	0.62001	0.91435	0.93963	0.24458
YKL007W	1.28315	1.24778	1.45556	1.35745	1.57566	1.4017	0.85049	0.73318	0.93694	0.52917	0.79564	0.55667	1.08235	1.10686	1.16209	1.24447	0.96012	1.27796	0.98242	1.17446	1.50971	1.44872	0.7083	0.94216	1.32358	1.3082	1.64087	1.29206	1.15269	1.05585	0.56488	0.52359	0.55723	0.30877	1.25705	1.2211	1.59898	1.56208	0.89825	0.92254	0.85438	1.05628	1.17456	0.83582	1.53787	1.37596	1.012	1.61273	1.75084
YIL048W	0.35404	0.34443	0.33101	0.27108	0.27984	0.40717	0.24571	-0.0789	0.32251	0.40668	0.38952	0.35785	0.80637	0.57637	0.70788	0.79097	0.73055	0.74354	0.30433	0.44993	0.31232	0.37405	0.44038	0.04989	0.54472	0.55567	0.06703	0.62343	-0.04249	0.48706	1.01389	0.19259	0.12489	0.18028	0.33738	0.34327	0.37589	-0.02397	0.52935	0.23392	0.1913	0.34049	0.39167	0.1464	0.2337	0.42152	0.0044	0.36456	-0.36941
YDL213C	2.17971	1.44698	2.18196	1.98302	2.29386	1.62392	2.0258	2.75543	1.54421	1.93713	1.84831	2.40694	2.09046	2.20805	1.71633	1.43611	1.80938	2.2994	1.93925	2.41931	0.86036	1.3519	0.96971	2.46794	1.46187	0.91179	1.97613	1.03325	2.63544	1.99912	-0.12383	2.2525	1.3328	1.6797	1.54451	1.67952	1.93448	2.0602	1.38207	2.22825	1.93055	1.43376	2.22356	1.15239	2.01247	1.87748	2.1726	1.9628	1.76542
YDR443C	-0.26202	-0.23355	-0.1745	-0.2954	-0.34105	-0.38759	-0.2906	-0.1039	-0.25993	-0.24122	-0.15654	-0.21791	-0.23316	-0.16665	-0.19817	-0.37073	-0.09279	-0.35931	-0.31835	-0.16884	-0.15369	-0.11422	-0.18308	-0.28164	0.08765	0.05336	-0.63334	-0.04019	0.10055	-0.15105	-0.42222	-0.25981	-0.59729	-0.2775	-0.20359	-0.25173	-0.28501	0.03898	0.09048	0.02441	-0.12651	-0.16008	-0.33095	-0.14514	-0.18302	-0.55219	-0.52411	-0.38145	-0.72368
YNL292W	1.04705	1.17849	1.16202	1.11614	1.15513	1.2453	1.58875	1.49232	1.29917	1.41113	1.32118	1.38851	1.0576	1.02212	1.27603	0.9666	1.04891	1.17613	0.82672	1.20112	0.53657	1.0013	0.60691	1.10542	0.6873	0.65711	1.10094	0.80934	0.97042	0.97711	0.16864	0.87943	0.71904	0.65704	0.97681	1.15832	0.78632	0.58956	0.79826	1.21388	1.03435	1.08624	1.05872	0.99515	1.07844	1.15184	1.10085	0.85705	1.2953
YKL183C-A	-4.49182	-3.14095	-4.3653	-4.47168	-4.27735	-4.38649	-3.7104	-4.15239	-4.82641	-4.73284	-4.81835	-4.81657	-3.87336	-4.40709	-4.77164	-4.61969	-4.37098	-4.62638	-4.047	-4.03687	-4.51227	-4.50073	-3.77186	-4.57582	-3.915	-4.08903	-4.27463	-4.98633	-3.86742	-4.77892	-3.59676	-4.0771	-3.32323	-4.85356	-3.75151	-3.95522	-3.73149	-3.26786	-4.01817	-4.50023	-4.7316	-4.57293	-3.75909	-5.05513	-4.29282	-5.28118	-4.7432	-4.97829	-3.81148
YOR324C	-0.41849	-0.40188	-0.32619	-0.38265	-0.44142	-0.39002	-0.41003	-0.73047	-0.89992	-0.49811	-0.57564	-0.35999	-0.27029	-0.46118	-0.38814	-0.55401	-0.35856	-0.68992	-0.09261	-0.13035	-0.0868	-0.0655	0.30248	-0.09156	-0.15189	-0.15954	-0.6903	-0.27392	-0.45528	-0.7995	0.128	-0.1203	-0.06012	0.36684	-0.47855	-0.56479	-0.11229	-0.25371	0.24786	-0.28652	-0.58241	-0.52111	-0.42987	-0.22735	-0.76115	-0.6558	-0.56068	-0.47699	-0.7221
YKL100C	1.27371	1.08551	0.8783	1.04078	0.96019	1.1341	1.1744	0.91588	1.14291	1.25569	1.06617	0.93457	1.5169	1.3322	1.25245	1.46826	1.19472	0.86922	1.01257	1.0457	1.18597	1.50985	1.67588	0.75035	1.43708	1.67386	0.86025	1.71356	0.75781	0.35963	2.06195	0.48675	0.42856	0.42414	1.01459	1.18532	1.19859	0.93512	1.33108	0.96074	1.4234	1.36678	1.06684	0.7134	0.95543	0.571	0.91715	1.54612	0.64696
YNL134C	1.11186	1.1192	0.96899	1.31014	0.82751	1.36149	-0.5806	-0.19177	-0.50777	-0.35584	-0.23485	-0.5253	-0.04279	-0.02626	0.07425	0.69079	0.05674	-0.01286	-0.87818	-0.84397	0.18507	0.64722	0.34808	-0.14998	-0.919	0.16033	0.89725	1.39782	-0.00818	0.0785	1.06785	0.68408	-1.01076	-0.63734	-0.9374	-1.08481	-1.12879	-0.99675	0.58927	0.70393	-0.71335	0.41156	0.91802	1.19546	0.79822	0.24211	-1.20874	-0.13493	0.24945
YOR192C-B	2.70656	2.664	2.66824	3.19922	2.73352	3.02684	0.75775	1.34008	1.14001	1.00042	1.14752	1.13276	0.71419	0.77615	0.72205	0.30782	0.86942	0.52729	3.14829	3.81669	2.4239	3.3978	4.13103	4.13902	3.97711	3.87062	3.06551	2.78117	4.114	2.12356	1.3283	1.95452	3.73164	3.72429	3.03615	3.74015	4.16402	4.14853	4.62009	4.64997	2.71338	2.47283	4.00958	2.23835	1.84269	1.96571	1.43312	1.68056	2.01762
YPL021W	-4.56852	-4.13846	-4.65491	-4.84505	-4.96833	-4.71444	-4.66439	-4.43769	-4.90951	-4.60189	-4.35527	-4.63027	-5.02109	-4.51553	-4.40792	-4.87076	-4.64077	-4.70295	-4.85892	-4.93403	-4.49553	-4.61891	-4.78124	-4.4192	-4.18798	-4.29759	-4.68159	-4.54321	-4.30064	-4.04281	-4.55984	-4.35605	-4.7093	-3.78955	-4.03849	-4.50421	-4.93789	-3.93974	-4.78715	-4.40055	-4.15986	-4.84794	-3.87317	-4.55849	-4.2953	-4.15529	-4.33417	-4.14522	-4.57916
YIL146C	-0.86842	-1.05573	-0.89937	-0.94985	-0.97247	-1.05202	-0.58951	-0.62215	-0.66419	-0.74636	-0.55118	-0.37972	-0.70254	-0.89518	-0.82693	-0.6275	-0.74681	-0.82486	-0.83231	-0.95044	-0.85101	-0.74239	0.03249	-0.61287	-0.59263	-0.25719	-0.80565	-0.43085	-1.03236	-0.68721	0.33748	-0.12185	-0.66794	-0.40297	-0.33665	-0.49558	-0.68003	-0.53923	-0.72988	-1.36947	-1.16243	-1.04826	-0.41881	-0.01787	-0.74796	-0.93259	-1.30559	-1.06684	-0.83393
YIL171W	-4.33208	-3.91048	-3.5759	-3.97393	-4.03447	-3.2607	-4.6959	-4.60093	-3.87669	-4.55231	-5.1509	-4.94707	-4.8332	-4.79585	-4.47985	-4.52929	-4.36625	-3.15893	-4.34617	-3.47372	-4.87389	-4.21835	-4.51783	-2.69474	-3.77618	-3.785	-4.61682	-4.35319	-4.73393	-3.91001	-4.7197	-4.1791	-4.85437	-5.96742	-4.7949	-3.29397	-4.92213	-3.67167	-4.10795	-2.18178	-4.42727	-4.33012	-4.70173	-4.46095	-4.36246	-3.95568	-4.41498	-4.1663	-4.81093
YNL218W	-1.2628	-0.85723	-1.0453	-1.05098	-0.96911	-1.07239	-1.09813	-1.24089	-0.94706	-1.12201	-0.87992	-0.88982	-1.24211	-1.46068	-1.31129	-1.18774	-1.48302	-1.62059	-1.03339	-0.90372	-1.07248	-1.22318	-1.13237	-1.27565	-0.95912	-1.21259	-1.04078	-1.12713	-0.78506	-0.96679	-1.32242	-0.77921	-0.7116	-0.86236	-1.11781	-1.01559	-0.84136	-1.05137	-0.97486	-1.17948	-1.05121	-0.92324	-0.94655	-1.23831	-1.17166	-0.86555	-1.22116	-1.31745	-0.95625
YIL121W	1.45168	1.45263	1.13212	1.3854	1.2943	1.4819	-2.90099	-2.85591	-3.01932	-3.47035	-2.1899	-2.72014	-3.43303	-3.79494	-3.2368	-4.22873	-3.22543	-3.83989	0.23601	-0.23141	-3.56909	-3.21123	1.92671	1.44184	0.02051	0.46188	-2.90024	-2.71548	-3.59436	-2.78512	1.39889	0.63764	1.31237	1.60009	-0.04054	0.09283	1.33093	1.31055	1.698	1.0157	0.84922	1.20691	-4.20693	-3.48799	-2.51179	-2.80579	1.11318	1.30697	-3.26291
YDL167C	1.15588	1.291	1.59734	1.43793	1.45244	1.48307	1.39177	1.2244	1.29494	1.45602	1.44817	1.51026	1.06837	1.23009	1.3518	1.22916	1.46293	1.238	1.26554	1.42765	1.48114	0.94844	1.19034	1.65115	1.38148	0.95268	1.44067	0.95588	1.6912	1.13612	1.14988	1.15556	1.06035	1.36023	1.69838	1.52104	1.18734	1.15546	1.6315	2.03916	1.49859	1.2594	1.54886	1.17752	1.35566	1.55331	1.63705	1.31287	1.33341
YNL228W	-3.81326	-4.37188	-3.87692	-3.97735	-3.81119	-4.08963	-4.76781	-4.26911	-4.07507	-4.33395	-4.40384	-4.43582	-4.42024	-4.60405	-4.26556	-4.29494	-4.51801	-4.59383	-4.5082	-3.73419	-4.13413	-3.72117	-4.09886	-4.33077	-3.68628	-3.60547	-4.01507	-3.50017	-4.23283	-4.3814	-4.50635	-4.60132	-5.20298	-4.23292	-3.996	-3.98821	-4.39115	-4.28838	-4.08393	-3.80525	-4.36077	-4.11694	-4.57793	-4.01421	-3.89444	-4.13068	-4.15781	-4.00145	-4.53589
YPL214C	-0.91232	-0.54741	-0.81893	-0.78176	-0.86067	-0.76043	-0.62163	-0.46355	-0.34144	-0.38759	-0.46398	-0.40838	-0.39539	-0.39804	-0.36122	0.15983	-0.02151	-0.14672	-0.83465	-0.84267	-0.53894	-0.52125	-0.91776	-0.86224	-0.34472	-0.38654	-0.82926	-1.16998	-0.7964	0.03061	-0.25334	-0.67657	-0.4764	-0.06559	-0.82594	-0.84395	-0.61639	-0.45414	-0.69228	-0.76711	-0.70427	-0.81545	-0.32127	-0.22648	-0.89049	0.25057	-0.77509	-0.89513	-0.77639
YOR228C	-1.06143	-1.06002	-1.39163	-1.19674	-1.33345	-1.22879	-1.27889	-1.46787	-1.40752	-1.3246	-1.37446	-1.32422	-0.60419	-0.65159	-1.0472	-0.68938	-0.78577	-1.12842	-0.88494	-1.3718	-1.16567	-0.82377	-0.48805	-1.21185	-1.4676	-0.98031	-1.06428	-0.38214	-1.55979	-1.20706	0.26656	-1.11465	-0.75908	-1.04125	-1.49427	-1.40468	-1.08309	-1.17433	-1.20016	-1.53112	-0.9204	-1.05004	-1.353	-0.81138	-1.38768	-1.35418	-1.14603	-0.98175	-1.30968
YBR270C	-2.19377	-2.00364	-1.83437	-2.01873	-1.98183	-1.8471	-1.74715	-1.55625	-1.62143	-1.79585	-1.56915	-1.40444	-2.07801	-1.97494	-2.08368	-1.68142	-2.01613	-2.19377	-2.24735	-2.22341	-1.92131	-2.08078	-2.23373	-2.10345	-1.749	-2.13653	-1.74241	-2.62797	-2.15705	-1.73717	-2.23364	-1.48452	-1.79135	-1.83356	-1.79249	-1.97639	-1.47338	-1.48704	-2.01169	-1.79899	-1.62681	-1.91449	-1.98424	-1.60357	-1.71457	-1.85514	-1.63819	-1.80954	-1.82756
YEL063C	2.0351	1.82756	1.73127	2.0971	1.8502	1.93201	2.20323	2.03571	2.0932	2.3204	2.05973	2.25754	2.25809	2.31618	2.00155	1.86235	2.04993	2.14619	2.33205	2.16348	2.04005	2.18977	2.22711	2.23483	1.78583	2.00954	1.98594	2.08396	1.88269	2.12012	3.10167	2.25331	2.00594	2.00972	2.28996	2.18506	2.07521	1.98511	2.07254	2.2154	2.36899	2.01453	2.05489	1.6295	2.01499	1.95518	1.94652	2.2876	1.68676
YGR222W	-0.52685	-0.80216	-0.43624	-0.40947	-0.48933	-0.33687	-0.40471	-0.91344	-0.25106	-0.63435	-0.47307	-0.5741	-0.28675	-0.42062	-0.30413	-0.24931	-0.28644	-0.82293	-0.55222	-0.33843	-0.1779	-0.47616	-0.81809	-0.65395	-0.55841	-0.84526	0.23547	-0.37875	-0.2189	-0.27351	-0.55659	-1.16326	-1.12827	-1.78619	-0.33795	-0.66886	-0.18173	-0.59416	0.04901	-0.32116	-0.63751	-0.50396	-0.5095	-0.81943	-0.44301	-0.35981	-0.76161	-0.67472	-0.10596
YAL068W-A	-3.25033	-4.41062	-3.29165	-4.16895	-3.62006	-3.69436	-4.84427	-4.13691	-4.84904	-4.91346	-4.66533	-5.10703	-5.22382	-4.87755	-4.65692	-4.80161	-4.86657	-4.45279	-4.25697	-4.9186	-4.93554	-4.79002	-3.74378	-3.64844	-4.68639	-4.87677	-3.9297	-3.89649	-4.00581	-3.47083	-4.10293	-4.98328	-4.34181	-4.96764	-4.2326	-4.84817	-4.83754	-4.69719	-3.75511	-3.8879	-4.42654	-5.21403	-4.87741	-5.02534	-3.50072	-4.12239	-5.03715	-4.31659	-3.87825
YML020W	-0.82927	-0.84917	-0.85225	-0.98625	-1.02151	-1.26814	-1.00659	-1.26383	-1.0179	-1.15277	-0.92437	-0.93569	-1.18338	-1.39719	-1.28549	-1.21147	-1.47127	-1.54922	-0.95969	-1.09085	-1.04991	-1.10405	-1.32598	-1.3545	-1.16625	-1.7566	-1.17975	-1.17182	-0.99884	-1.10885	-1.26365	-1.00416	-0.74684	-0.29555	-0.8897	-1.04056	-0.78813	-0.94803	-1.12101	-1.06064	-0.80984	-0.95341	-0.85528	-1.2857	-0.98095	-1.1227	-0.86567	-0.92216	-0.89676
YGR121C	-1.93259	-1.47694	-2.07274	-1.96703	-1.83871	-2.31429	-0.49473	-0.68529	-0.58219	-0.36563	-0.55072	-0.34002	0.80705	0.51972	0.28664	0.98717	0.33188	0.52723	-1.75426	-1.61517	-2.05449	-2.312	-0.32303	-1.03376	-1.83305	-1.49927	-2.15255	-1.82342	-2.30198	-1.65691	-0.15058	-0.81553	-1.05514	-1.32596	-1.6459	-1.9092	-0.96558	-1.07263	-1.16291	-1.76517	-0.53901	-0.34939	-1.45105	-1.37274	-1.39424	-1.89108	-1.79625	-1.51451	-2.18808
YDL095W	3.27327	3.01572	2.99844	3.14193	3.09232	3.27868	3.32059	3.23462	3.17399	3.45987	3.27223	3.2909	3.79319	3.71487	3.67786	3.83101	3.62907	3.9287	3.43914	3.28543	3.461	3.42856	3.57063	3.34678	3.52779	3.62338	3.32683	3.45494	3.37409	3.43244	3.77479	3.49932	3.14094	3.22624	3.55582	3.46681	3.40298	3.34961	3.17334	3.16214	3.34303	3.15782	3.43441	3.39709	3.51	3.32657	3.32968	3.38088	3.17321
YBR222C	1.6176	1.45566	1.29589	1.46833	1.1742	1.40264	1.06966	0.86315	0.90644	1.0511	0.93359	1.14936	1.64627	1.43144	1.07874	1.28776	1.12361	1.16669	1.59227	1.23069	1.38718	1.48449	1.88979	1.08757	0.89496	1.36361	1.26995	1.73671	1.43494	1.27791	1.80137	0.98751	1.54958	1.88377	1.28024	1.17323	1.5972	1.42682	1.31287	0.91751	1.08843	1.07568	1.56759	2.05871	1.23404	0.95594	1.4729	1.37918	1.21486
YDL003W	0.04253	0.24127	0.42216	0.13207	0.26599	0.31193	0.38232	0.60538	0.44093	0.23601	0.41365	0.4526	-0.0749	-0.02789	0.12626	0.14922	-0.10282	0.4736	-0.38924	0.21462	-0.12786	-0.0405	-0.58649	0.51172	0.43143	-0.62693	0.82789	-0.35388	0.29948	0.4528	-0.79011	0.40934	0.1674	0.44033	-0.39944	0.12128	0.39405	0.60449	0.00109	0.26283	0.31268	0.1457	0.21361	0.28978	0.00441	0.59233	0.37632	0.28314	0.79703
YOR323C	2.53844	2.8486	2.81348	2.73725	2.61215	2.75351	2.48002	2.68146	2.80025	2.5871	2.86909	2.58009	2.47184	2.49388	2.6602	2.4857	2.77052	2.537	2.45295	2.42668	2.61916	2.22598	2.43001	2.62813	2.54215	2.49702	2.95845	2.61106	2.74211	2.50937	2.62265	2.8041	2.83413	2.2698	2.75942	2.51604	2.85773	2.86902	2.5525	2.63202	2.98714	3.16958	2.64911	2.65408	2.84064	2.75983	3.16914	2.81451	3.0935
YMR183C	1.77436	1.93928	1.81007	1.86714	1.81348	1.92967	1.8377	2.26851	1.79511	1.78237	1.8894	1.8602	2.24003	2.43222	2.12503	1.87472	2.29616	2.44105	1.64616	1.98221	1.57309	1.86093	1.64328	2.05419	2.2566	1.82523	1.88745	1.85334	1.95062	1.72037	1.07451	2.11199	2.15114	1.72958	1.79609	2.08327	1.94403	2.29737	1.75305	1.80791	2.10162	2.12272	2.0263	2.199	2.26651	1.87921	2.25027	2.00987	1.86799
YOR274W	-1.06615	-1.00605	-0.73577	-0.97798	-0.98974	-1.13931	-0.61087	-0.76476	-0.71475	-0.76277	-0.71996	-0.66909	-0.80653	-0.99072	-0.87984	-0.92381	-0.89809	-0.74696	-0.65534	-0.5036	-1.27134	-1.21054	-0.95992	-0.63647	-0.95667	-1.31198	-1.00813	-1.22586	-0.98433	-0.97543	-1.59565	-0.94832	-0.92892	-1.19588	-0.83395	-0.8522	-0.80022	-0.79681	-0.58443	-0.57837	-0.99714	-1.06263	-1.00059	-1.39905	-0.90744	-0.79894	-0.98881	-1.41314	-0.94156
YER146W	2.36367	2.68164	2.52457	2.44372	2.06164	2.12788	2.57818	3.54017	3.189	3.14244	2.78411	3.15249	2.933	3.00391	2.80984	2.21923	2.60232	3.05537	2.22753	2.39202	2.62901	2.95075	2.35159	2.75898	2.82482	3.33994	2.13292	2.55364	2.63165	2.47237	2.14188	3.39419	3.06955	3.95443	1.97002	2.55603	2.94495	3.44153	2.94369	2.31305	2.73188	2.81285	3.18852	3.44883	2.21737	2.47392	2.86715	2.48781	2.5254
YML075C	1.69987	1.70668	1.52914	1.687	1.5485	1.70621	3.13707	2.59023	3.06568	3.19034	3.16513	3.2037	3.87058	3.60329	3.50389	3.58548	3.56785	3.72067	1.89768	1.81187	2.83359	2.56761	2.46307	1.99017	1.88932	2.05754	2.23364	2.54596	2.23075	2.749	2.64405	1.79077	2.16622	1.94074	1.89163	1.85469	1.93189	1.64269	2.3283	1.89283	2.02256	2.0364	2.83653	2.6301	2.37857	2.66865	1.98988	1.92185	2.39879
YOL035C	-4.00074	-4.66974	-4.25911	-4.49833	-4.72016	-4.54475	-4.60757	-4.32227	-4.54845	-4.80867	-4.6934	-4.43712	-4.31708	-4.59266	-4.33001	-4.71032	-4.44481	-4.65727	-4.39719	-4.4598	-4.36893	-4.53918	-4.72005	-4.11046	-4.74921	-4.29297	-4.29654	-4.44816	-4.39692	-4.72395	-4.1446	-4.79634	-4.97526	-4.83452	-4.58062	-4.63087	-4.81308	-4.91195	-4.64583	-4.57381	-4.39694	-4.72246	-4.70631	-4.47742	-4.51761	-4.36314	-4.69918	-4.53168	-4.59193
YPL063W	2.52642	2.36639	2.41804	2.33173	2.37383	2.32174	2.99966	3.21491	3.14921	2.93164	3.08672	3.06617	2.85022	2.89093	2.91665	2.63394	2.9774	2.68369	2.3216	2.5561	2.53036	2.48877	2.33679	2.40987	2.46948	2.26304	2.85868	2.81171	2.68486	2.69123	2.23734	2.53623	2.30093	2.26721	2.5469	2.54006	2.43929	2.39527	2.23926	2.53979	3.1294	3.14334	2.34284	2.34879	3.00793	2.73063	3.02188	3.04094	3.12738
YDR457W	1.60838	1.53099	1.70128	1.60074	1.60302	1.74654	1.12074	1.02838	1.225	1.18013	1.28213	1.04701	1.01085	1.05517	1.1134	0.93187	1.1196	0.93371	1.09361	1.26851	1.62121	1.4647	0.97098	1.02888	1.63262	1.3098	1.19505	1.54755	1.54805	1.54966	1.44579	0.70548	0.54125	0.45197	1.22363	1.17518	1.28613	1.42071	0.90283	1.15974	1.70032	1.72974	1.56701	1.13754	1.66868	1.58768	1.49913	1.69779	1.28544
YLR273C	-1.81997	-2.11971	-1.82935	-1.81989	-1.75321	-2.37961	-1.82461	-1.96933	-1.69434	-2.10859	-1.71831	-1.91274	-2.68994	-2.98423	-2.77223	-2.57359	-2.70924	-2.87014	-1.7773	-1.80426	-1.2779	-1.77486	-1.59441	-1.88033	-1.84584	-2.31662	-1.79478	-2.01325	-1.42289	-1.08611	-1.68731	-2.29256	-1.54652	-2.05966	-1.79883	-2.20879	-1.89068	-2.17836	-1.78509	-1.8685	-2.03108	-1.93172	-1.76496	-1.6532	-1.70536	-1.33768	-2.2788	-1.98935	-1.75005
YDR181C	-0.7399	-1.04745	-0.66987	-1.02369	-0.70654	-1.15811	-0.68305	-0.25385	-0.75782	-0.8029	-0.77143	-0.6102	-1.05089	-1.0741	-1.11047	-1.20281	-0.80394	-0.94833	-0.98743	-0.95869	-1.306	-1.13996	-1.51813	-0.78544	-0.86753	-1.34222	-0.89205	-0.99275	-0.58455	-0.94038	-1.86187	-0.80709	-0.85266	-1.7546	-0.72257	-1.01296	-0.92438	-0.6831	-1.14719	-0.89936	-0.81449	-0.7301	-0.88722	-1.30369	-0.8095	-0.97913	-0.79057	-0.92094	-0.7551
YGL097W	1.53382	1.58264	1.45232	1.49103	1.59113	1.60867	1.58109	1.46773	1.62725	1.54892	1.32877	1.54863	1.3129	1.46464	1.57752	1.53438	1.34582	1.41145	1.25896	1.26281	1.065	1.23151	1.27881	1.42393	1.31254	1.48044	1.26779	1.07687	1.42149	1.17696	1.25941	1.49514	1.67836	1.9266	1.3819	1.43714	1.4561	1.51382	1.38724	1.3511	1.27444	1.43622	1.35997	1.19019	1.60195	1.4888	1.87738	1.44581	1.6788
YCL056C	-0.68833	-0.60194	-0.26407	-0.56061	-0.41332	-0.37316	-0.61929	-0.28568	-0.68947	-0.61819	-0.74479	-0.41809	-0.66398	-0.39356	-0.27823	-0.60009	-0.21283	-0.4886	-0.44479	-0.41581	-0.73511	-0.57862	-0.83536	-0.45399	-0.62989	-0.62119	-0.59965	-1.0194	-0.32095	-1.26797	-1.29406	-1.17241	-0.7574	-2.09855	-1.19449	-0.97552	-0.49115	-0.48073	-1.12134	-0.56393	-0.75697	-0.83511	-0.62889	-1.56544	-0.73624	-0.54164	-0.78791	-0.54672	-0.39224
YJL083W	-0.22395	-0.03099	-0.39148	-0.18974	-0.48008	-0.34103	-0.20108	-0.11525	-0.19714	-0.22801	-0.00128	0.02645	-0.01551	-0.08316	-0.4319	-0.13115	-0.56633	-0.48805	-0.04501	-0.41279	0.40699	0.31867	0.18563	-0.52428	-0.21663	-0.00574	-0.19591	0.45122	-0.20266	0.22343	0.67709	0.2089	0.11858	-0.10478	0.28409	-0.14485	-0.11027	-0.24412	-0.13785	0.02049	-0.16486	-0.1592	-0.38001	0.05006	-0.39526	-0.3236	-0.30951	-0.07913	-0.33573
YMR242W-A	-4.36667	-3.81479	-4.87337	-4.64425	-4.10343	-4.64519	-4.6347	-4.39872	-5.19015	-5.09186	-4.57477	-4.30358	-4.6845	-3.66648	-4.72205	-5.05313	-4.49523	-4.19099	-4.38073	-4.48823	-3.76439	-4.81302	-4.94203	-4.40595	-4.03084	-4.83241	-3.60743	-4.97466	-3.8956	-2.98005	-3.2376	-3.54466	-5.53325	-4.64475	-3.37177	-4.75727	-4.11385	-4.48885	-4.67221	-4.10781	-4.64929	-4.57276	-3.63726	-4.15434	-4.25985	-4.48676	-4.29514	-4.51715	-4.3729
YOR026W	-0.02653	0.21213	-0.1889	0.06823	-0.27937	-0.12888	-0.03652	0.11407	0.04809	0.0211	0.01192	-0.06712	-0.10258	-0.11274	0.11523	0.03211	0.42736	0.10088	-0.5721	-0.2831	0.09595	0.06388	-0.22739	-0.54293	0.06246	0.20135	-0.39945	-0.42129	-0.2676	0.38186	-0.33047	-0.31514	-0.06719	0.06339	-0.09312	-0.17038	-0.24407	-0.32836	0.10001	0.00403	-0.27434	-0.14985	-0.13206	-0.14789	-0.13731	0.36901	0.16219	-0.16316	0.05341
YPL140C	-0.92863	-0.62322	-0.66354	-0.85588	-0.97206	-0.73929	-0.73337	-0.68407	-0.72959	-0.89531	-0.74946	-0.67478	-1.11274	-1.0249	-0.95716	-1.02262	-0.99201	-0.92616	-1.08564	-1.13003	-0.94267	-1.29916	-0.85368	-0.82898	-1.21322	-1.3012	-0.76891	-1.05938	-0.91969	0.07582	-0.7916	-0.45989	-0.61969	-1.0901	-0.91067	-0.89357	-0.89566	-0.87018	-0.79308	-0.69415	-1.14091	-1.14345	-0.68909	-1.03368	-0.90858	-0.05068	-0.73222	-1.07353	-0.60383
YNR016C	3.81748	3.92272	3.80783	3.76587	3.89638	3.96295	4.09949	3.90896	4.10052	4.3964	4.36904	4.32684	4.18304	4.17997	4.22857	4.19545	4.14573	4.46604	3.59399	3.56574	4.05325	3.92838	3.99374	3.35935	3.48598	3.37187	4.02603	4.12318	3.4332	3.87822	4.43212	3.49858	3.86731	3.62797	3.64427	3.40804	3.35652	3.1628	3.59843	3.4856	4.55042	3.85709	4.36779	4.23295	4.35004	3.9722	3.80992	4.26061	4.1924
YER123W	0.44702	0.42635	0.72808	0.45978	0.7007	0.51799	0.85214	0.47487	0.7093	0.79639	0.95809	0.7962	0.84279	0.76953	0.8113	0.7129	0.8988	1.01912	0.66029	0.53088	0.8825	0.51432	0.64557	1.0443	0.52487	0.31726	0.78233	0.53007	0.53792	0.73969	0.80423	0.59405	0.7765	0.28489	1.04075	0.79329	0.65215	0.50751	0.80643	0.98235	0.7133	0.69848	0.75902	0.26024	0.712	0.69657	0.77626	0.6387	0.75457
YKR054C	-0.13569	-0.11829	-0.23239	-0.25109	-0.1244	-0.15835	-0.64695	-0.86156	-0.61697	-0.51952	-0.47413	-0.57762	-0.78304	-0.96813	-0.79045	-0.68773	-0.66569	-0.88769	-0.76761	-0.74656	-0.34548	-0.39567	-0.47682	-0.59319	-0.35716	-0.59809	-0.78904	-0.31708	-0.39128	-0.50093	-0.45584	-0.75431	-1.11016	-1.16213	-0.59605	-0.80351	-0.80306	-0.93777	-0.62043	-0.45147	-0.27237	-0.25393	-0.48309	-0.67655	-0.4043	-0.62167	-0.65088	-0.424	-0.8454
YGR055W	2.84791	2.7601	2.55506	2.72655	2.62498	2.68389	3.72367	3.37835	3.29254	3.7114	3.78538	3.30136	3.36967	3.25828	2.93349	3.18845	3.14838	3.17104	3.52451	3.47253	3.70913	3.9316	3.50008	3.15165	3.2198	3.08385	3.62214	4.11748	3.10637	2.70297	4.25543	3.47644	3.38019	3.48279	2.77462	3.03543	3.0886	2.5669	2.77059	3.00153	3.07365	2.90501	3.1123	2.86583	4.19495	2.62858	3.18073	3.29316	2.85836
YMR315W	1.23566	1.49793	1.04077	1.42417	1.05167	1.34483	0.58779	0.74118	0.75889	0.78795	0.44168	0.93867	0.45407	0.67785	0.66709	1.05846	0.57888	0.59631	1.49198	1.23609	1.72218	1.71593	1.57247	0.92564	1.91148	1.86997	1.89608	2.01581	1.17344	1.13486	1.7612	1.55775	0.93874	1.22071	1.06043	0.89702	1.68188	1.63258	1.00164	0.6629	1.82076	1.55372	0.98861	1.70374	1.26493	1.06937	1.93104	2.21781	1.81866
YAL024C	-0.57007	-0.41689	-0.53903	-0.61284	-0.5977	-0.7054	-0.45282	-0.57172	-0.54243	-0.46895	-0.39024	-0.40025	-0.73749	-0.76573	-0.60262	-0.70187	-0.60895	-0.58177	-0.71854	-0.84325	-0.52618	-0.5787	-0.75156	-0.74998	-0.4201	-0.53752	-0.67604	-0.59876	-0.69388	-0.40944	-0.83562	-0.71602	-0.61229	-0.88841	-0.50468	-0.69922	-0.50353	-0.43162	-0.47639	-0.38705	-0.4983	-0.46029	-0.28531	-0.57543	-0.51211	-0.48432	-0.70128	-0.73152	-0.74127
YKL202W	-3.92671	-4.46755	-4.27983	-4.13296	-4.46215	-4.35533	-3.96399	-3.82709	-3.89828	-2.65086	-4.19637	-4.61123	-4.11544	-4.32393	-4.28383	-3.98697	-4.0812	-5.33182	-4.23639	-4.28194	-3.84488	-3.56757	-3.78651	-4.78251	-4.25657	-3.92512	-4.56837	-4.67558	-3.77219	-3.84972	-4.24095	-5.07211	-4.30592	-3.04041	-4.95504	-4.28595	-4.20931	-4.06842	-4.68831	-5.28429	-5.26489	-4.54511	-4.55523	-3.71663	-4.45517	-4.06114	-3.89998	-4.59373	-3.50018
YKL187C	-1.56567	-1.33259	-1.60412	-1.4951	-1.5529	-1.91829	-1.99126	-2.0076	-2.09924	-2.02532	-1.86312	-1.67318	-1.92569	-2.01931	-2.09711	-1.61961	-2.12014	-2.25272	-1.06953	-1.63925	-1.40741	-1.42734	-1.13243	-2.16911	-1.45672	-1.64935	-1.42503	-1.27428	-2.31812	-0.99659	-0.48479	-1.42047	-1.39218	-1.90105	-1.96623	-2.21457	-2.32747	-2.39016	-1.2152	-1.74584	-1.61866	-1.732	-1.17479	-0.50905	-1.53936	-1.31162	-1.57191	-1.453	-1.59908
YDR383C	-1.67185	-1.61875	-1.50338	-1.53282	-1.31115	-1.57514	-1.79411	-1.52581	-1.80363	-1.69741	-1.98088	-1.74415	-2.20301	-2.01172	-2.20417	-2.15855	-2.21643	-2.12911	-2.0113	-1.39417	-2.09918	-1.4718	-2.54752	-1.87688	-1.58547	-1.89053	-1.54381	-1.63251	-1.46129	-1.67702	-2.67759	-2.34079	-1.51565	-1.96233	-2.23793	-1.93279	-1.61061	-1.32773	-2.3473	-2.08941	-1.54555	-1.59334	-1.33604	-1.77428	-1.57375	-1.5278	-1.43494	-1.53119	-1.5757
YDR396W	-4.35354	-4.14902	-3.68655	-4.20985	-4.29244	-2.96475	-4.00879	-4.67446	-4.65828	-3.04437	-3.82394	-4.12587	-3.59051	-3.86655	-3.7326	-4.23942	-3.54167	-3.99635	-4.14482	-4.02816	-4.31088	-4.44771	-4.52522	-4.31595	-4.21513	-4.25583	-4.83543	-4.37139	-4.20226	-4.06392	-4.18534	-4.18435	-4.67379	-3.12352	-4.37688	-3.9462	-4.60691	-4.37966	-4.08403	-4.03932	-4.2013	-4.00441	-4.48794	-4.80415	-3.44082	-4.14923	-3.02121	-4.14599	-4.03132
YKL055C	-0.5131	-0.50301	-0.82846	-0.64819	-1.01458	-0.21627	-0.85422	-0.89235	-1.01094	-0.90477	-0.94579	-0.71103	-1.00446	-1.29121	-1.07274	-0.96582	-1.17519	-1.39986	-0.56166	-0.92089	-0.65803	-0.74514	-0.18056	-0.41636	-0.95384	-0.64845	-0.81235	-0.5169	-0.62844	-0.55497	0.26557	-0.35177	-0.50126	-0.65989	-0.7909	-1.06932	-0.71613	-0.88833	-0.19565	-0.26397	-0.72776	-0.78868	-0.79826	-0.38448	-0.72892	-0.70537	-1.11453	-0.85998	-0.73068
YGR115C	-4.24173	-4.73503	-4.34505	-4.15349	-4.29888	-4.47276	-4.71936	-4.83299	-4.55247	-4.80901	-4.38518	-4.7645	-4.51165	-4.44394	-4.37376	-4.59023	-4.85847	-4.98978	-4.76095	-4.63215	-4.91956	-4.41127	-5.07257	-4.65469	-4.88161	-4.8327	-5.00779	-4.51624	-5.16829	-4.62486	-4.81249	-4.90154	-5.13972	-4.30837	-4.94232	-4.31861	-4.73539	-4.98716	-4.74549	-4.3527	-4.73766	-4.2782	-5.07061	-4.87926	-4.53895	-4.46129	-4.98993	-4.59373	-4.93948
YDR035W	2.42456	2.21454	2.34649	2.55168	2.41176	2.49953	2.49062	2.61008	3.00519	2.91612	3.00858	2.63	1.98322	2.11449	1.98031	1.91752	2.20212	2.0223	2.34521	2.11267	2.2942	1.9959	2.02563	1.70804	2.23836	1.90752	2.1523	1.93301	2.10312	1.9798	3.31521	2.27849	1.83481	1.69983	2.74445	2.44671	2.45519	2.07569	2.34171	2.53892	2.66901	2.58139	2.0891	1.47875	2.79643	1.90297	2.12282	2.71524	2.80838
YBL062W	-4.39332	-4.14712	-4.08866	-4.08086	-4.3784	-4.62992	-4.97591	-4.21296	-5.30641	-4.47633	-4.06077	-4.76488	-3.79041	-4.18357	-3.75851	-3.69928	-3.75485	-3.97807	-4.98001	-3.8583	-3.21691	-4.37614	-4.38257	-4.23675	-5.03671	-4.50551	-3.06389	-3.86733	-3.45562	-4.71499	-4.39452	-4.13766	-3.33939	-3.75405	-3.46387	-4.75727	-3.83405	-4.08562	-4.25408	-4.22194	-3.67395	-3.94752	-4.42558	-3.12628	-4.01807	-4.40655	-4.44313	-4.34628	-4.06759
YHR160C	-4.26167	-4.42436	-4.37186	-4.53986	-4.28025	-4.36475	-4.6347	-4.60093	-4.74932	-4.7922	-4.415	-4.72542	-4.7086	-4.55471	-4.14222	-4.69167	-4.48367	-4.62662	-4.08898	-4.42175	-4.5458	-4.54001	-4.24622	-4.43315	-4.38275	-4.45868	-4.15871	-4.32155	-4.12594	-4.47599	-3.83237	-4.39751	-4.7405	-5.12807	-4.21881	-4.56568	-4.31379	-4.37874	-4.29158	-4.59195	-4.73773	-4.40916	-4.05381	-4.46095	-4.83806	-4.68687	-4.23214	-4.08477	-4.31218
YGR047C	-0.61353	-0.47708	-0.4357	-0.48082	-0.47811	-0.58129	-0.54474	-0.46625	-0.58219	-0.6196	-0.50148	-0.5253	-0.95111	-0.89675	-0.6967	-0.83695	-0.77356	-0.78226	-0.76217	-0.76702	-0.66106	-0.68834	-0.81311	-0.7164	-0.40044	-0.68503	-0.57442	-0.66653	-0.54148	-0.55767	-1.07196	-0.68312	-0.64069	-0.64347	-0.55868	-0.77515	-0.62754	-0.54941	-0.85823	-0.74418	-0.43143	-0.28868	-0.58735	-0.70482	-0.4655	-0.45344	-0.5325	-0.63434	-0.51559
YDR119W	1.62519	1.30502	1.32572	1.59293	1.58155	1.47025	1.4771	0.90834	1.38245	1.90036	1.5664	1.24946	2.05842	1.84056	1.90532	1.90147	1.99715	1.68664	1.63448	1.52941	1.73593	1.40775	1.74128	1.19448	0.97349	0.93867	1.27857	1.72509	1.03743	1.16122	2.14082	0.88503	1.10597	0.4866	1.62671	1.36223	1.37919	0.86861	1.31484	1.08175	1.74556	1.65331	1.54059	0.71535	1.26228	1.38035	1.43832	1.61797	1.44069
YBR208C	-0.41208	-0.15249	-0.41726	-0.40227	-0.36635	-0.42095	0.29025	0.0161	0.01035	0.76967	0.61235	0.86343	0.04203	-0.08126	-0.14992	-0.23065	-0.06744	-0.09803	-0.59828	-0.55798	-1.37366	-1.12161	0.53299	0.12189	-0.69533	-0.34313	-1.43118	-1.05217	0.05981	-0.16943	0.77768	0.35674	0.39982	0.44296	-1.20888	-0.90737	0.97884	0.51235	0.40658	0.32846	0.95112	1.68926	-0.52924	-0.46494	0.56059	-0.14391	0.572	0.90383	-1.37512
YER151C	1.26135	1.15896	1.45583	1.31504	1.28113	1.19398	1.31814	1.19547	1.31444	1.31933	1.25973	1.17952	0.84796	0.86753	1.08626	0.87628	1.07769	1.20024	1.12161	1.31703	0.98421	0.92874	0.80221	1.39553	1.17278	0.6817	1.36687	0.91953	1.32907	1.35581	0.46869	1.17406	1.1609	1.19038	1.29523	1.51748	1.12098	1.27667	1.01726	1.66574	1.49463	1.28681	1.4796	1.12432	1.34794	1.39823	1.59219	1.26535	1.35203
YLR070C	-2.61706	-2.31212	-2.65624	-2.78759	-2.63068	-3.10953	-3.96399	-3.05331	-3.77688	-4.05694	-3.56122	-3.64882	-3.5362	-3.55828	-3.37682	-3.28241	-3.52453	-3.78685	-2.95151	-3.19151	-3.03246	-2.97725	-2.78444	-3.81348	-2.70642	-3.21736	-2.85219	-3.16501	-3.51864	-3.42605	-3.38438	-3.48948	-2.68237	-2.42786	-3.30107	-3.47177	-3.01274	-2.76158	-3.24978	-3.50365	-3.03771	-3.0393	-3.12125	-2.61083	-3.14833	-3.0577	-3.19192	-2.53736	-2.69548
YPR019W	0.63516	0.67769	0.51149	0.60326	0.46811	0.6984	0.57989	0.3366	0.62167	0.77146	0.67373	0.57467	0.63856	0.42218	0.38605	0.4973	0.5011	0.48941	0.45117	0.65515	0.51836	0.2614	0.77836	0.47336	0.59874	0.76694	0.39021	0.76413	0.52771	0.72633	0.8971	0.355	0.45441	0.25783	0.89663	0.7822	0.47137	0.3031	0.49529	0.45448	0.60181	0.80109	0.62608	0.69141	0.86223	0.60876	0.36296	0.72371	0.30492
YPL228W	0.25744	0.13812	0.2526	0.2372	0.30352	0.12847	0.1829	0.21576	0.22536	0.16549	0.34625	0.1374	-0.11636	-0.10576	-0.0886	-0.07465	-0.10726	-0.01365	-0.22383	0.00589	-0.19463	0.11932	-0.35947	0.14073	0.14077	-0.24654	0.19729	-0.20821	-0.02947	1.05984	-0.47576	0.31042	0.03173	0.46296	0.21989	0.33888	0.16241	0.28547	-0.02322	0.01193	0.16077	0.25093	0.115	0.01794	0.42929	1.2318	0.35882	0.15685	0.31528
YPR190C	0.83643	0.8928	1.13248	0.92241	0.98555	0.93345	1.25264	1.03307	1.34148	1.22695	1.32022	1.33734	0.88315	0.90156	1.08298	1.02818	1.19641	1.20168	0.70093	0.93114	0.56776	0.38124	0.56674	1.03719	0.61058	0.24205	0.81738	0.35143	0.89884	1.07709	0.84376	1.17717	0.68023	0.73187	1.13041	1.08878	0.74712	0.52678	0.88856	1.35067	1.05203	1.16142	1.0436	0.61104	0.91668	1.24997	1.21583	0.90741	1.24419
YGR041W	0.82797	1.01631	0.64505	0.80629	0.64639	0.90759	0.25579	0.31806	0.35275	0.34155	0.34427	0.16076	0.36762	0.34178	0.41067	0.47682	0.32067	0.31801	0.52417	0.31502	-0.18778	-0.30146	0.82495	0.4198	-0.72006	-0.64079	0.0818	0.11979	0.85028	0.56726	1.44778	0.49001	0.88947	0.67057	0.90134	0.70355	-0.47093	-0.25445	-0.82361	-1.12566	0.8952	0.92346	1.21331	1.20417	0.27643	0.65528	0.73138	0.55079	1.09783
YHR097C	-0.93514	-0.86528	-0.85964	-0.867	-1.0695	-0.83859	-0.97845	-0.70268	-1.05855	-1.00062	-0.81636	-1.04692	-0.981	-1.19436	-1.28517	-1.24963	-1.11074	-1.60581	-0.02973	0.07398	0.55626	0.75398	-0.22996	0.06376	-0.06438	0.21271	-0.18906	-0.09452	-0.04276	-0.98248	-1.41279	-0.85776	-0.26666	-0.15738	-0.9866	-0.67911	0.28074	0.50638	0.34609	0.43797	-0.80094	-0.85625	-0.58446	-1.04665	-0.50468	-1.03279	-0.81832	-0.35026	-0.27838
YDR353W	3.72556	4.23078	4.07527	3.8987	3.75184	3.91503	3.94369	3.94925	4.25578	3.95086	4.08518	4.16625	4.1434	4.32712	4.20708	4.06393	4.17562	4.22974	4.10838	3.99527	4.08855	4.13677	3.98117	3.73337	3.86751	3.77715	4.29507	4.25215	3.94862	4.03108	4.52409	4.50705	4.30608	4.39488	4.1559	4.00879	3.89802	4.12646	3.90762	3.74797	4.1094	4.34197	3.70172	4.61922	4.40869	4.03792	4.50326	4.07812	4.15629
YPL047W	0.86484	0.68655	0.76348	0.83743	0.80001	0.70451	0.83125	0.50597	0.92476	0.69395	0.91073	0.9641	0.89398	0.8892	0.83067	1.12766	0.86325	1.10044	0.86146	0.89716	0.69573	0.8221	1.11911	0.35084	0.88269	1.02241	0.55435	0.69646	0.54616	0.85862	1.59555	0.8281	0.98342	1.27784	1.04094	0.61895	0.85882	0.57397	1.19776	0.6799	0.62994	0.94168	0.58185	0.62326	0.57441	0.6347	0.60958	0.54294	0.55473
YPL014W	-0.30672	0.02437	-0.45241	-0.15392	-0.60015	-0.31481	0.00149	0.32818	-0.0703	-0.06999	-0.08156	-0.03615	0.83896	1.06794	0.6787	0.70835	0.49922	0.72733	-0.20476	-0.25419	0.42169	0.79381	0.25628	-0.1632	0.67862	0.77333	-0.23951	0.43503	-0.65444	-0.07086	0.62009	0.51881	0.05312	0.43175	-0.3974	-0.38763	0.43328	0.51964	-0.07597	-0.09888	0.37531	0.28192	-0.02429	0.4776	-0.07843	-0.25973	0.1124	1.10313	-0.03765
YGR007W	1.3855	1.55571	1.41781	1.43366	1.35385	1.48554	1.31903	1.37062	1.34788	1.2877	1.22992	1.27321	0.91387	0.97582	1.18062	1.16419	1.38111	1.05008	1.10028	0.99383	1.24872	1.32514	1.06496	0.87484	1.39552	1.43435	0.8991	0.88351	1.07876	0.90731	0.86935	1.40001	1.30064	1.50716	1.16858	1.18208	1.60884	1.62462	1.28052	1.44365	1.17703	1.42466	1.07259	1.24944	1.34612	1.17399	1.67656	1.2989	1.20005
YML116W	0.23078	-0.17083	-0.2736	-0.24543	-0.30504	0.00044	-0.32445	-0.55538	-0.3648	-0.09578	-0.43783	-0.09864	-0.28826	-0.64866	-0.6486	-0.23378	-0.59827	-0.67044	0.30764	0.10109	-0.54204	-0.57817	-0.37239	-0.40978	-0.09612	-0.20337	-0.14547	0.21216	-0.2711	-0.37768	2.26784	1.02012	-0.50439	-0.47731	0.35069	0.1057	-0.81882	-0.94435	-0.71252	-0.48653	-0.64475	-0.85067	0.02861	-0.27121	-0.81852	-0.33182	-1.02109	-0.8922	-0.83032
YOL137W	0.14008	-0.04726	-0.18449	-0.1094	0.1648	-0.02186	-0.20986	-0.67736	-0.41271	-0.29458	-0.64253	-0.44388	0.56294	0.65248	0.48551	0.37405	0.13425	0.38163	0.01701	0.26163	-0.36761	-0.47018	-0.05627	-0.14124	-0.75668	-0.52891	-0.63435	-0.30503	-0.35288	-0.65385	0.43156	-0.415	-0.29352	0.17087	-0.0858	0.03236	-0.02124	-0.31932	-0.41721	-0.38555	0.02554	-0.16588	-0.01651	-0.24165	-0.12651	-0.7187	-0.29902	0.04831	-0.74127
YGL155W	0.52706	0.70713	0.59384	0.59316	0.62728	0.54002	0.77679	0.6982	0.94715	1.05074	1.10895	0.85592	0.63341	0.54051	0.52712	0.63414	0.64061	0.75055	0.53628	0.52173	0.71216	0.55325	0.7793	0.69284	0.75854	0.57396	0.48014	0.49281	0.28134	0.86859	1.03359	0.60262	1.05261	0.45197	0.82746	0.60602	0.66359	0.56286	0.8203	0.88795	0.61606	0.63864	0.53399	0.776	0.64246	0.5126	0.74825	0.55135	0.56856
YER061C	-0.85379	-0.84245	-1.02449	-0.81951	-0.92743	-0.8697	-1.00572	-1.06284	-1.04572	-0.91845	-0.98528	-0.76901	-1.38055	-1.17169	-1.00135	-0.98122	-0.91091	-1.12428	-0.92105	-1.14765	-0.70889	-0.97947	-1.08926	-0.52301	-1.12602	-1.50929	-0.41611	-0.49817	-0.84183	-1.28081	-0.24427	-0.70275	-1.06568	-1.31942	-1.14499	-1.41659	-0.97239	-1.25391	-1.19634	-0.3892	-1.00188	-1.10736	-1.01304	-0.77656	-0.57356	-1.26615	-1.04167	-1.195	-0.69167
YKL214C	0.70653	1.04038	0.6682	0.88997	0.67611	0.70661	0.8065	0.85127	0.96669	0.80284	0.95996	1.03022	1.02699	1.02486	1.12271	0.88907	0.64159	0.90432	0.59874	0.71173	0.7332	0.7819	0.58384	0.53327	0.39276	0.68158	0.56681	0.79534	0.5409	0.54617	0.42201	1.04578	0.94279	1.26165	0.42845	0.81696	0.45603	0.72421	0.69062	0.57949	0.30326	0.89231	0.45959	1.05028	1.07263	0.99661	0.49655	0.8276	0.86979
YPL119C	-1.85268	-1.64905	-2.10991	-1.98378	-2.08073	-2.3652	-2.83919	-2.57274	-2.5885	-2.94017	-2.65395	-2.63025	-4.11029	-4.04333	-4.06344	-4.26131	-4.09786	-4.14759	-2.06608	-2.13004	-2.06512	-1.81135	-1.87241	-2.74147	-2.05855	-1.97843	-2.14087	-1.60374	-2.32809	-1.39822	-1.8249	-1.88342	-2.10589	-1.10994	-2.23267	-2.56629	-1.91685	-1.95123	-2.48145	-2.73834	-1.88735	-1.94275	-2.14127	-1.50325	-2.36544	-1.42641	-2.26639	-1.73155	-2.14523
YDL125C	3.48096	3.3579	3.13785	3.27941	2.9588	3.42815	3.61191	3.48161	3.47079	3.4954	3.45646	3.37376	3.80725	3.87829	3.69138	3.81518	3.75717	3.81453	3.50331	3.3381	3.19624	3.73798	3.66077	3.3569	3.20472	3.64975	3.11744	3.82463	3.18858	3.29392	4.28158	3.89003	3.2666	4.11476	3.71935	3.51286	3.52229	3.41359	3.64179	3.34862	3.58458	3.69263	3.39194	4.1837	3.20789	3.24393	3.52622	3.7038	3.30989
YHR186C	0.3141	0.50827	0.50317	0.48406	0.386	0.53829	0.12369	-0.08403	0.34397	0.28988	0.36625	0.25776	0.08707	0.14177	0.27315	0.36466	0.29138	0.1484	0.33396	0.17566	0.5247	0.26249	0.22861	0.06987	0.25886	0.10022	0.35698	0.38188	0.33282	0.38066	0.54711	0.29842	0.2252	0.27102	0.42915	0.29394	0.39443	0.28021	0.15023	0.10461	0.26683	0.49249	0.29925	0.54894	0.33255	0.53044	0.50054	0.35069	0.61945
YKL011C	-1.48375	-1.69792	-1.42262	-1.59937	-1.40295	-1.95567	-1.85647	-1.74534	-1.80817	-2.40499	-1.92876	-1.89346	-2.00816	-2.40636	-1.81824	-1.80651	-1.9559	-1.60413	-1.92281	-1.92172	-1.74843	-1.63154	-2.39129	-1.99188	-1.82933	-1.8822	-1.53223	-2.1064	-1.9572	-1.43492	-2.73479	-2.0172	-2.16136	-2.04307	-1.98776	-2.21325	-1.7703	-1.5474	-1.62626	-1.94102	-1.97652	-1.9633	-1.87548	-1.62938	-1.41873	-1.48801	-1.95365	-1.82622	-1.45469
YLL019C	0.49012	0.60805	0.26569	0.56657	0.26478	0.3841	0.3978	0.43833	0.5267	0.49391	0.4038	0.58184	1.01536	1.08456	0.86891	0.96822	1.00823	0.97732	0.68327	0.41026	1.14659	1.21464	1.24449	1.16133	0.96757	1.20379	0.98548	1.3175	0.70527	0.582	1.43006	0.86772	0.44506	0.5411	0.69097	0.64289	0.88908	0.81797	0.71776	1.07159	0.76254	0.72464	0.7629	0.54352	0.76985	0.29071	0.69644	1.1967	0.48293
YNL257C	-0.19865	-0.29754	-0.12324	-0.23319	-0.09757	-0.27472	-0.57678	-0.7067	-0.55476	-0.73822	-0.54773	-0.64043	-0.52496	-0.47351	-0.3209	-0.496	-0.28333	-0.48423	-0.54797	-0.41604	-0.39359	-0.67132	-0.62514	-0.51441	-0.38838	-0.48287	-0.31714	-0.66331	-0.32726	-0.21337	-0.97364	-0.96893	-0.65721	-1.25957	-0.29845	-0.32081	-0.54872	-0.45752	-0.46991	-0.54886	-0.57731	-0.44983	-0.3851	-0.56275	-0.40975	-0.37418	-0.44715	-0.38591	-0.24055
YGL199C	-2.96551	-3.00855	-3.05418	-3.23977	-3.06688	-3.28533	-3.08787	-3.13148	-2.95348	-3.25342	-2.73664	-2.79308	-2.35757	-2.91102	-2.91269	-2.86842	-2.9774	-3.05306	-2.81495	-3.13473	-3.22127	-2.86698	-2.61101	-3.40392	-3.38498	-2.7877	-3.35055	-2.48423	-3.54506	-3.30794	-2.82229	-3.0562	-3.04618	-2.89613	-2.75739	-3.07314	-2.97485	-3.03335	-3.17064	-3.63164	-2.27203	-2.88856	-2.96487	-2.57102	-3.07435	-3.50073	-3.51505	-3.29865	-3.12591
YJR092W	0.57381	0.30725	0.59772	0.51847	0.78579	0.44023	0.40795	0.43185	0.28647	0.28737	0.43872	0.3703	0.52321	0.28398	0.27211	0.3446	0.34385	0.39326	0.27011	0.44224	0.45714	0.62396	0.17405	0.34164	0.61242	0.44518	0.27507	0.71717	0.81721	0.90856	-0.57465	0.28757	0.28853	0.14196	0.49596	0.34055	0.49265	0.58138	0.54414	0.40576	0.66079	0.55616	0.77648	0.44957	0.73719	0.64727	0.55723	0.48417	0.43615
YDR010C	-4.14499	-2.69808	-4.42942	-4.19824	-4.26351	-4.36475	-4.38575	-4.43769	-4.53816	-4.95662	-4.40761	-4.42646	-4.28873	-4.15582	-4.4889	-4.40415	-5.25144	-4.68816	-4.20196	-3.71333	-3.72604	-4.4464	-3.93985	-3.91835	-3.70651	-3.56063	-3.38785	-4.10183	-3.39061	-3.45054	-4.99521	-2.22181	-3.27578	-3.736	-3.34182	-3.94984	-4.06582	-3.9102	-4.17135	-4.27303	-4.752	-4.35597	-3.64588	-5.0105	-3.91285	-3.65458	-3.96588	-3.64723	-4.69082
YBR291C	0.41379	0.65181	0.32694	0.57127	0.38645	0.5308	0.9348	1.12307	1.34374	1.56453	1.03363	1.34422	1.55987	1.54157	1.42043	0.37384	1.12189	1.00766	1.12116	1.14752	-0.25559	-0.62713	-0.41175	-0.20365	0.53419	0.62031	-0.68071	-0.52177	0.07424	0.0377	2.28526	1.13701	0.31683	0.80254	1.08575	0.89159	-0.70323	-0.53234	-0.21616	0.19569	-0.82634	-0.722	0.42134	0.33755	-0.25657	0.66284	-0.79036	-0.85148	-0.24606
YBL059W	-0.87212	-1.07258	-0.98338	-1.10854	-1.12496	-1.50001	-1.25227	-0.84664	-1.06473	-0.7746	-1.06227	-0.91354	-0.6754	-0.59296	-0.7123	-0.6204	-0.729	-0.72669	-0.71185	-0.91113	-0.94478	-0.90212	-1.30167	-0.69928	-0.8535	-1.73451	-0.80692	-1.44319	-1.15989	-1.50512	-0.75838	0.02056	-0.54977	-0.40998	-1.14249	-0.89412	-0.91693	-0.71095	-0.94457	-1.04762	-0.72547	-0.71509	-1.07686	-1.12394	-0.90268	-1.05499	-0.70999	-0.82926	-0.89064
YPL189C-A	0.0795	-0.04512	-0.41753	-0.14271	-0.43576	-0.50084	-0.4846	-0.32014	-0.28218	-0.29104	-0.27159	-0.62532	1.25544	1.06196	1.2202	1.53786	1.06209	1.72031	0.15791	-0.294	0.22707	-0.30875	0.4739	-0.28089	-1.84279	-1.51124	-0.06024	0.00271	-1.32924	0.03318	0.78746	0.15562	-0.88116	0.0322	0.65124	-0.15494	-0.45762	-0.78039	-0.59535	-0.61633	-0.49087	-0.08285	-1.77197	0.46318	-0.95366	-0.11126	-0.18144	-0.05285	0.41356
YPL275W	-4.16756	-3.82303	-4.05235	-3.95321	-3.50997	-4.0419	-3.32994	-3.46276	-3.39012	-3.76053	-3.47848	-3.17192	-4.80908	-4.11425	-4.09553	-4.40415	-4.40865	-4.68816	-4.60332	-3.58047	-4.00919	-4.21835	-1.78737	-3.26376	-4.09411	-3.97772	-3.79985	-3.55676	-1.31031	-3.76641	-4.03625	-4.29334	-4.77893	-3.58963	-3.86052	-4.02844	-4.48671	-3.54945	-3.61159	-3.73486	-4.14557	-4.03493	-1.5922	-1.11892	-4.21826	-3.79001	-4.28198	-4.59373	-0.64591
YDR262W	0.76169	1.04778	0.88848	0.73499	0.66566	0.74593	-0.05731	0.20677	0.11128	0.21123	0.12784	0.07832	-0.09449	-0.25325	-0.22575	-0.19248	-0.04247	-0.58454	0.23529	0.15913	1.73112	1.71716	0.39178	-0.04696	0.45431	0.73406	0.17831	0.50394	1.16603	0.10775	0.7786	0.43611	0.40265	0.70932	0.39384	0.27039	0.43628	0.34815	1.38488	1.17713	0.39787	0.19958	0.60463	0.27453	0.75968	0.58448	0.56534	0.87454	0.45052
YLR078C	0.27802	-0.27827	0.05966	0.24014	0.29619	0.15949	-0.0089	-0.08578	0.01334	0.31854	-0.19305	-0.04517	-0.06485	-0.11096	0.01156	-0.26524	0.30224	0.29124	0.23533	0.07304	0.08549	-0.03769	-0.1526	0.08956	-0.0331	-0.33522	0.10687	-0.3968	0.2311	0.01629	-0.46099	-0.37354	0.03267	-1.06911	0.30724	0.15398	0.07927	0.01673	-0.05342	0.48566	0.05287	-0.05244	0.13614	-0.91733	-0.1152	0.19041	0.38431	0.08298	0.49215
YFL012W	-4.19521	-4.32366	-4.21833	-4.79765	-4.3784	-4.54209	-4.6959	-4.78855	-4.55591	-5.07036	-4.70905	-4.63027	-4.67182	-4.15582	-4.58033	-4.61024	-4.71082	-4.81102	-3.63355	-4.43216	-4.41937	-4.95342	-3.9665	-4.39199	-4.9767	-4.83241	-4.26715	-4.08828	-4.34336	-3.70713	-4.17969	-3.84179	-4.53037	-4.40078	-4.31831	-5.31164	-4.3693	-5.15528	-4.34268	-4.58082	-5.07871	-4.65386	-4.64683	-4.15434	-4.15495	-4.01682	-4.47177	-4.51715	-5.19304
YDR072C	1.91014	1.49278	1.37535	1.66729	1.54762	1.80886	1.91042	1.34515	1.62411	1.73247	1.8947	1.77982	2.43748	2.20027	2.30456	2.36581	2.51207	2.4651	1.98261	1.85394	1.74497	1.94444	2.31012	1.53507	1.13186	1.74368	1.60917	2.08649	1.62807	2.07896	2.64153	1.81329	1.41104	1.80166	2.0068	1.9524	2.04953	1.58424	2.15593	1.41056	1.65931	1.66469	1.91754	2.07161	1.67234	2.01468	1.79806	1.64491	1.56442
YKL153W	-4.37533	-4.24029	-4.72004	-3.88294	-4.42138	-4.52996	-4.66439	-4.51008	-4.47703	-4.61182	-4.81656	-4.78399	-4.57324	-4.22788	-4.43824	-4.61024	-4.66379	-4.32498	-4.65938	-4.57486	-4.51305	-4.55963	-4.6464	-4.66194	-4.55291	-4.73338	-4.26715	-4.67558	-4.64147	-4.80502	-4.25098	-4.41819	-4.94067	-3.6071	-4.59958	-4.35734	-4.78155	-4.72558	-4.67221	-4.04415	-4.39685	-4.2782	-4.48117	-4.7457	-4.6539	-4.68687	-4.24431	-4.49148	-4.51095
YDR179C	-2.33403	-2.87117	-1.6936	-2.29711	-1.72073	-2.84356	-2.08607	-1.91617	-2.32741	-2.52722	-2.46048	-2.30752	-2.78249	-3.19672	-2.38613	-3.40679	-2.49302	-2.38009	-2.2683	-2.17426	-2.60447	-2.7628	-3.46425	-2.40269	-1.80408	-3.05976	-2.01894	-3.27935	-2.51033	-2.12071	-3.66676	-3.60942	-3.44863	-3.62546	-3.01062	-2.8423	-1.814	-2.02047	-2.91845	-2.84506	-1.55506	-2.11905	-2.41695	-3.21429	-2.05054	-2.31822	-1.94873	-1.90081	-2.14695
YIL053W	3.93527	4.76203	3.67132	4.76463	3.69763	4.56128	4.5669	4.96207	4.71881	4.96137	4.26685	5.082	3.8847	4.52619	3.88482	4.29345	3.90824	4.36867	4.79766	4.56641	4.18967	4.43068	4.83886	4.8731	4.6125	4.95457	4.39013	4.86882	4.59576	4.73031	5.37521	5.33854	4.61241	5.0786	4.72121	4.92711	4.30726	4.70708	4.42249	4.8207	4.64433	5.18639	4.33817	5.10205	3.92692	5.49138	4.91768	5.40524	4.20589
YGR220C	0.39299	0.19866	0.68627	0.56934	0.68952	0.28704	1.22395	1.31582	1.05398	1.29683	1.01223	1.35845	1.19932	1.24825	1.28582	1.43258	1.7261	1.8874	0.57839	0.47315	0.63586	0.82733	1.09401	0.8361	0.31991	0.29677	1.30546	0.49237	0.6815	0.65739	1.01206	1.32123	0.43021	1.06946	0.41821	0.62747	0.59492	0.60232	1.05677	0.65623	1.00703	1.01664	0.78614	0.66907	0.7768	0.99146	1.01963	0.98957	1.27902
YMR161W	1.68228	1.8561	1.32905	1.57844	1.53018	1.69075	1.55231	1.59016	1.70094	1.68521	1.72763	1.73531	1.61096	1.65733	1.55548	1.7525	1.52886	1.6785	1.90971	1.78003	1.43171	1.81588	1.84986	1.60985	1.68989	1.71255	1.22932	1.5797	1.37451	1.3354	1.35941	1.73008	1.86981	2.32054	2.01649	1.92819	1.48564	1.51383	1.79526	1.32374	1.39696	1.62472	1.39382	1.84584	1.64288	1.61595	1.37581	1.41239	1.21503
YER011W	2.31762	1.98509	2.07417	2.26485	2.25276	2.48044	2.36577	2.0083	1.58334	1.54858	1.94338	1.13079	0.42138	0.36665	0.22504	-0.07565	0.51906	0.04172	3.53132	3.80751	1.63959	3.12976	3.14291	2.97343	4.50926	4.99634	0.54545	1.19195	2.10975	2.75284	2.05099	2.58616	3.14434	3.96584	3.40957	3.87949	3.26792	3.92791	4.46257	3.19407	1.98947	2.93143	2.45449	0.13442	1.42716	3.28896	4.18562	3.87663	0.28563
YDR258C	-0.68256	-0.56472	-0.78156	-0.39321	-0.61941	-0.59293	-0.86774	-0.56756	-0.34708	-0.83672	-0.93293	-0.78349	-1.29412	-2.18352	-2.12141	-1.59546	-1.96001	-2.19738	-1.5316	-1.60336	-0.95699	-0.95738	-1.02065	-1.24506	0.2691	-0.52343	-0.03992	-0.3593	-1.23192	-0.20947	-0.95053	-0.79729	-0.72505	-0.58297	-0.98473	-0.933	-0.91609	-1.02505	-1.23168	-1.18658	-0.51193	-0.31297	-0.72569	-0.90942	-1.14412	-0.08893	-0.85572	-0.62613	-0.46903
YDR467C	-3.04327	-3.00855	-2.72911	-2.67259	-2.63068	-3.50995	-3.82947	-3.63922	-3.21022	-3.26222	-3.08016	-3.17192	-3.52292	-4.06152	-3.32946	-3.81847	-3.67074	-4.39059	-2.996	-3.29138	-3.05824	-3.37381	-2.40403	-3.47382	-2.69986	-3.19756	-2.75407	-3.06996	0.42737	-3.07078	-2.7627	-1.32933	-2.10305	-3.57166	-2.31175	-3.22406	-2.53338	-3.55909	-3.05211	-3.64998	-2.85331	-3.2043	-2.78273	-2.3561	-3.27308	-2.96774	-3.07837	-2.96516	-2.96073
YGL162W	0.21372	0.10995	0.36567	0.50851	0.26309	0.20158	0.74363	0.7211	0.88353	0.32413	0.95023	0.62755	0.02841	0.00736	-0.35478	-0.39471	-0.17782	-0.51457	1.31363	1.13258	0.61011	0.5225	0.67479	0.61615	0.23306	0.34076	-0.15376	-0.18143	0.70655	0.09213	0.91373	0.56328	1.02665	1.4378	0.97939	1.11353	0.46972	0.88925	1.19297	0.83578	0.25937	0.99852	0.99337	1.0522	0.25188	0.32678	0.84292	-0.04725	0.17904
YNL243W	1.62937	1.84381	1.54242	1.69668	1.64722	1.72997	1.51133	1.41693	1.6259	1.65005	1.62317	1.54962	1.24815	1.33235	1.34122	1.42765	1.28735	1.44417	1.53924	1.69191	2.05647	2.01494	1.60245	1.36906	2.11029	2.02952	1.65008	1.86066	1.82384	1.71691	1.33122	1.45237	1.81215	2.19611	1.48397	1.58646	2.26202	2.0773	1.73212	1.53712	1.79591	1.9339	2.02669	1.92342	1.79557	1.79956	1.97992	1.92086	1.71284
YBR234C	2.17948	2.25008	1.99926	2.12499	2.04821	2.15093	2.39851	2.40693	2.60826	2.65313	2.5233	2.53558	2.58187	2.59186	2.30668	2.52648	2.4348	2.48785	2.31417	2.119	2.15362	2.4278	2.61458	1.97987	2.42946	2.79911	2.18085	2.73858	1.79275	2.34043	3.18561	2.55015	2.04258	2.65529	2.69681	2.57042	2.42505	2.43942	2.84562	2.38827	2.24916	2.39324	2.03156	2.37221	2.21565	2.27339	2.58758	2.6459	2.074
YNL047C	-0.48616	-0.20044	-0.27489	-0.35865	-0.69498	-0.45179	-0.60325	-0.4977	-0.55737	-0.91045	-0.38855	-0.62293	-0.43241	-0.41809	-0.53302	-0.58056	-0.44077	-0.73708	-0.34358	-0.19504	-0.25524	-0.21602	0.08904	-0.04457	-0.2074	-0.46948	-0.6668	-0.57985	-0.37281	-0.38186	-0.38637	-0.58291	0.03448	-0.11688	-0.27234	-0.5286	-0.1822	-0.17601	0.06866	0.02115	-0.48392	-0.54966	-0.55925	-0.32139	-0.4663	-0.50713	-0.64204	-0.54893	-0.28128
YKL038W	0.16359	0.15646	0.22399	0.29848	0.08373	0.41307	0.31917	0.33402	0.26611	0.14419	0.31133	0.33739	0.4483	0.58327	0.44468	0.50848	0.44241	0.27033	0.28546	0.13513	0.29558	0.4168	0.72607	0.45274	0.19489	0.4465	0.15964	0.73409	0.30552	0.40513	0.87645	0.32022	0.33434	0.7628	0.55522	0.32536	0.17385	0.12077	0.36551	0.32244	0.29945	0.19249	0.45207	0.85491	0.09257	0.20173	0.1992	0.32054	0.15324
YFL053W	-4.08917	-3.81479	-4.02629	-4.21579	-3.90069	-3.93994	-4.57109	-4.49622	-4.48629	-4.70522	-4.64616	-4.2871	-4.36828	-4.33894	-4.4889	-4.71083	-4.51786	-4.40461	-4.07084	-4.11635	-4.81733	-4.48292	-3.75857	-4.26154	-4.60972	-4.65819	-4.0302	-3.44467	-4.40076	-4.49216	-3.71547	-3.63087	-4.36181	-3.736	-4.6495	-4.63087	-4.78155	-4.46643	-4.57632	-4.62428	-3.9856	-4.33012	-4.25379	-4.08245	-3.95762	-4.66727	-4.32101	-3.80008	-4.73313
YOR200W	-3.59765	-4.13193	-3.15415	-3.57169	-3.32799	-3.8412	-2.95068	-3.04059	-3.17701	-3.49103	-3.27127	-3.58265	-2.60817	-3.61248	-2.99974	-3.32838	-3.0712	-2.97174	-3.25365	-3.37019	-3.49226	-3.28296	-2.54487	-4.32423	-2.74586	-2.56937	-3.7554	-3.57447	-3.14156	-3.46335	-2.55165	-3.95847	-4.13754	-3.57166	-3.25744	-3.36031	-3.03149	-3.11901	-2.579	-3.40359	-3.06181	-3.57922	-3.46296	-3.3088	-3.08185	-3.54801	-3.49011	-3.08151	-3.39078
YKR060W	0.64952	0.70564	0.76142	0.67287	0.75896	0.71522	0.77627	0.91063	0.80819	0.72203	0.99656	0.81756	0.63831	0.93535	0.86716	0.22805	0.55813	0.79109	0.79816	0.72865	0.2875	0.24317	-0.14266	1.13488	0.48169	-0.38617	0.74201	-0.13112	0.52927	0.37498	-0.63481	-0.34268	0.57614	-0.03386	0.35133	0.64938	0.295	0.66285	0.46425	1.14123	0.78541	0.66784	0.47659	-0.45307	0.52533	0.55854	0.49122	0.4591	0.95334
YPR200C	-2.19971	-2.59811	-2.25889	-2.50603	-2.38403	-3.1387	-3.34308	-3.04906	-2.75819	-3.19386	-3.05368	-2.9676	-3.32876	-2.69748	-3.21069	-2.82331	-3.5206	-3.03029	-2.06823	-2.78213	-3.13515	-4.1759	-3.92211	-4.15374	-2.56345	-3.0368	-3.79051	-4.63722	-3.7583	-2.16301	-1.76405	-3.2281	-1.89368	-3.82655	-3.97035	-4.51645	-4.82268	-4.2732	-3.97919	-4.37216	-1.91191	-2.57185	-2.54239	-3.37197	-1.19393	-2.64563	-4.1511	-3.78569	-2.04565
YLR411W	-2.35674	-2.00213	-1.83526	-1.76781	-2.19946	-2.61147	4.14945	3.79298	4.19874	4.0431	3.79908	3.97719	4.54067	4.19915	4.64664	1.29497	4.03204	4.6347	2.21876	2.46835	3.04687	2.74507	3.06909	2.84526	-2.45703	-2.70119	-2.08939	-2.39052	2.4037	3.25295	-2.17433	-1.54586	-2.96363	-2.46461	-1.99165	-2.56626	-2.42566	-2.30098	-2.24379	-2.81553	-2.23724	-2.292	-2.00409	-1.82751	2.59744	3.64645	3.35727	3.69263	-2.03876
YLR318W	-2.22813	-2.17	-1.86991	-2.09718	-2.07619	-2.46056	-2.00002	-2.03937	-1.89682	-2.09441	-1.86351	-2.02169	-2.13217	-1.82251	-1.66528	-1.90907	-1.78157	-2.01582	-1.80656	-2.1185	-1.87361	-2.27837	-2.29486	-2.05704	-2.21854	-2.41623	-1.79949	-2.72303	-2.10192	-2.05994	-2.4121	-2.62059	-2.11868	-2.63563	-1.87403	-2.16755	-1.93971	-2.33052	-2.35622	-2.11477	-1.96118	-2.09245	-1.94669	-2.44865	-1.96849	-1.97954	-2.08228	-2.19991	-1.87008
YHR150W	-1.17186	-1.25347	-1.27334	-1.12905	-1.20138	-1.25016	-1.34398	-1.46251	-1.48567	-1.3756	-1.35707	-1.14222	-1.58447	-1.68658	-1.25506	-1.10413	-1.35361	-1.5438	-1.34459	-1.50997	-1.25283	-1.32579	-1.4978	-1.49085	-1.09838	-1.09794	-1.33167	-1.93585	-1.40938	-1.35193	-1.68724	-1.02453	-0.83777	-0.90105	-1.35919	-1.56652	-1.21391	-1.2744	-1.34796	-1.47172	-1.29916	-1.38107	-1.37087	-1.09638	-1.1861	-1.1681	-1.24682	-1.23088	-1.23047
YBR045C	-2.85896	-3.01597	-2.82502	-3.01349	-2.59711	-3.21053	-2.908	-2.69115	-2.72909	-3.4287	-2.87566	-3.12502	-3.99613	-3.65322	-3.96037	-4.51672	-3.6961	-3.65494	-2.91467	-2.96732	-3.32949	-3.28576	-2.78287	-3.12244	-2.85067	-3.27337	-3.05078	-3.15836	-3.07759	-2.71096	-3.26396	-3.74289	-3.14775	-3.37872	-3.16265	-3.37487	-3.55867	-3.30713	-2.77364	-3.13527	-3.13436	-3.0741	-2.97257	-3.48799	-3.14443	-3.12201	-3.23087	-2.85541	-2.78509
YGL219C	0.10824	0.25623	0.31312	0.3083	0.22731	0.27171	0.52998	0.79668	0.65815	0.48387	0.61897	0.51603	0.39192	0.59745	0.58249	0.40973	0.67164	0.66016	0.3264	0.23632	0.62848	0.1358	0.60335	0.79936	0.71715	0.2139	0.54689	0.12656	0.61786	0.75311	0.81584	0.85846	0.82555	0.85569	0.33702	0.50623	0.5916	0.6648	0.29276	0.65819	0.64121	0.49541	0.37106	0.28253	0.54381	0.58878	0.53956	0.54132	0.7689
YFL009W	0.70442	0.81376	0.74971	0.77627	0.68658	0.65982	0.28166	-0.08046	0.4503	0.54091	0.49088	0.48115	0.40194	0.36716	0.26921	0.4399	0.33596	0.33182	0.61097	0.33996	0.81166	0.6623	0.80738	0.64278	0.51605	0.63988	0.15245	0.5619	0.49576	0.47152	1.06257	0.37816	0.83259	0.66648	0.55638	0.22806	0.48455	0.15305	0.62207	0.53284	0.46256	0.54645	0.40071	0.74825	0.42657	0.43353	0.65226	0.51508	0.55254
YKL195W	1.34197	0.98842	1.1467	1.11199	1.42644	1.25252	1.62734	2.25175	1.40597	1.71603	1.45587	1.82013	1.39076	1.40383	1.14696	1.28793	1.30223	1.96688	1.18807	1.75841	0.61927	1.74647	1.03321	1.35243	1.17065	1.42602	1.60323	1.37707	1.43083	1.02181	0.40551	2.06866	0.50624	1.24731	1.21712	1.59862	1.20269	1.66031	0.98296	1.2225	2.05376	1.64688	1.31887	1.00178	1.44947	1.06974	1.64989	1.7355	1.45476
YMR039C	0.7772	0.3182	0.68079	0.30779	1.14215	0.4264	0.50509	0.87692	0.30371	0.41456	0.60417	0.52569	-0.07003	-0.12289	-0.15465	-0.52718	-0.00551	0.08211	0.1676	0.78631	-0.58823	0.08969	-0.58132	0.49005	0.4106	-0.33154	0.15967	0.18955	0.20511	0.16982	-0.32869	-0.45663	-0.05984	-0.79953	0.42944	0.68853	-0.24721	0.5329	0.19503	0.58354	0.70582	0.34891	0.28028	-0.68296	0.72873	0.29527	0.89962	0.69883	-0.06588
YGL147C	5.97512	5.38736	6.39736	5.36155	5.78482	5.0594	6.00791	5.77574	6.09803	5.80526	6.04638	5.80878	5.73926	5.7114	6.08595	5.79077	6.19676	6.03452	5.78653	5.23134	6.25535	5.07548	5.51171	5.29873	5.23408	5.03951	6.27148	5.68248	5.96284	5.61503	5.82908	5.89613	5.45186	5.40436	6.401	5.67694	5.6757	5.33844	5.79642	4.97767	6.13926	6.13595	5.35246	5.73845	6.09599	5.97141	6.27646	5.96862	6.42089
YPR127W	0.16227	0.59416	0.09933	0.05409	-0.04961	0.05946	-0.62187	-0.21739	-0.36046	0.03614	-0.19747	0.02577	-0.54832	-0.56825	-0.87984	-0.77559	-0.67483	-0.86286	0.92273	0.12441	0.91194	0.78913	0.29349	-0.28843	1.13687	1.39009	0.93321	0.9483	0.31231	-0.53623	0.8204	0.40546	0.33515	0.63566	-0.1629	-0.18511	0.69444	0.64825	0.18815	-0.19564	-0.15346	0.11545	-0.02036	0.75908	0.34733	-0.53344	-0.26008	-0.52663	0.32509
YPL188W	-0.09828	-0.10339	-0.02808	-0.13871	-0.12788	-0.13353	0.38977	0.02942	0.35949	0.14878	0.40874	0.28427	0.03544	0.0983	0.00456	-0.02227	0.13346	-0.00761	0.31537	0.25981	-0.0884	-0.28054	0.55464	0.27273	-0.11445	0.01444	0.14861	0.16456	0.22477	0.85842	0.92125	-0.09689	-0.20804	-0.27937	0.00031	-0.0973	0.12419	-0.20444	-0.50389	-0.12739	0.17325	0.17676	-0.20138	-0.17051	0.266	0.83123	0.37784	0.31457	0.18879
YDR217C	-0.45583	-0.60502	-0.38363	-0.54545	-0.32781	-0.65719	-0.79589	-0.49659	-0.75354	-0.68924	-0.70618	-0.54949	-1.4637	-1.54651	-1.39533	-1.32368	-1.35902	-1.36622	-0.57374	-0.5144	-0.97618	-1.09174	-1.13789	-0.44322	-0.55542	-1.1958	-0.84234	-1.10963	-0.49416	-0.75304	-1.41594	-0.55756	-0.85755	-0.81384	-0.6148	-0.69087	-0.83598	-0.65373	-0.92481	-0.41079	-0.40676	-0.82975	-0.50716	-1.20093	-0.73773	-0.83807	-0.79365	-0.7768	-0.94801
YML015C	-0.16272	-0.17513	-0.05282	-0.24775	-0.10682	-0.41886	-0.09015	-0.1472	-0.32173	-0.18826	-0.05523	-0.11132	-0.34404	-0.39019	-0.44534	-0.29986	-0.44028	-0.07712	0.05413	-0.00405	-0.2848	-0.32118	-1.09123	-0.09789	-0.51	-0.73799	0.11457	-0.45568	0.10502	-0.4586	-1.15033	0.03162	0.04629	-0.01526	-0.16706	0.09473	0.19051	0.15866	-0.51741	-0.25575	-0.24219	-0.24624	-0.02665	-0.02091	-0.42546	-0.33192	-0.17387	-0.39652	-0.03218
YJR126C	0.70897	0.79473	0.53205	0.62412	0.70302	0.65602	0.45682	0.1815	0.33929	0.58914	0.44336	0.34213	0.38348	0.28519	0.38338	0.66863	0.38943	0.30081	0.36299	0.29428	0.4947	0.43487	0.38802	0.11184	0.22514	0.20155	0.3075	0.57001	0.50394	0.26657	0.27405	0.39821	0.63119	0.52445	0.66984	0.5269	0.61396	0.27269	0.41639	0.44019	0.48953	0.78637	0.4471	0.35957	0.37303	0.50096	0.71556	0.79659	0.38971
YPR026W	-1.83466	-1.78868	-1.8165	-1.88951	-1.9085	-2.01698	-2.29264	-2.29008	-2.05746	-2.45704	-2.09817	-2.2795	-2.06099	-2.18962	-2.1082	-2.02728	-2.04502	-2.41788	-1.79571	-2.14788	-1.42919	-1.26637	-1.43974	-2.26217	-1.49643	-1.53995	-1.7822	-1.51979	-2.09843	-2.11795	-1.64411	-2.49706	-1.82878	-2.57648	-2.05799	-2.43626	-1.56837	-1.72039	-2.1306	-2.28902	-1.71842	-1.60483	-1.93692	-1.82387	-1.8459	-2.15677	-1.94262	-1.4096	-1.77184
YHR073W	0.80212	0.94363	0.87264	0.85673	0.918	0.74951	0.93391	0.73112	0.99352	1.02258	1.06541	1.17859	1.14944	1.08936	1.20505	1.05404	1.18156	1.13307	0.99324	0.92077	1.05448	0.87136	0.93715	0.85545	0.71239	0.81536	0.94584	0.9947	0.96209	0.80812	0.84277	0.96565	1.22707	0.63656	1.09336	1.04665	0.76622	0.75948	0.86319	1.03256	0.8466	0.97396	1.05503	0.65355	0.81461	0.83572	0.74707	0.81463	1.081
YMR274C	-0.18859	-0.50129	-0.37907	-0.43557	-0.43212	-0.25542	-0.38699	-0.6128	-0.54153	-0.5814	-0.59144	-0.73335	0.55013	0.3563	0.15184	0.05932	0.05941	0.09582	-0.22596	-0.39838	-0.3324	-0.15284	0.31316	-0.71512	-0.56603	0.09403	-0.39425	-0.00274	-0.93647	-0.18813	0.88939	-1.0318	-0.63762	-1.2755	-0.06856	-0.67174	-0.36132	-0.47836	-0.04802	-0.96211	-0.53905	-0.56537	-0.29916	-0.34911	-0.46984	-0.48141	-0.74435	-0.36174	-0.35616
YHR125W	-4.51692	-4.68962	-5.07236	-4.8147	-4.83865	-4.53956	-5.02842	-4.31491	-5.17361	-4.98696	-4.96276	-5.40237	-4.7158	-4.33709	-4.70924	-5.40128	-5.0286	-4.97233	-4.6804	-4.48295	-5.06178	-5.29895	-5.2383	-4.4533	-4.99978	-4.52952	-4.53609	-4.5047	-4.74369	-4.2601	-4.8263	-4.09488	-5.15424	-5.01172	-4.73976	-4.08576	-4.80724	-4.94523	-4.75761	-4.46454	-4.73842	-4.64239	-4.39239	-4.8707	-4.54092	-4.3984	-4.72733	-5.03948	-4.97441
YDL227C	-4.14499	-4.11545	-4.27983	-4.55357	-4.24101	-4.36475	-4.71812	-4.61695	-4.73806	-4.77844	-4.69787	-4.51961	-4.67182	-4.57166	-4.5573	-4.81163	-4.74495	-4.44549	0.64887	0.77496	0.0439	0.41499	0.33526	0.95435	0.94483	0.1982	-4.37616	-4.73567	0.72895	-3.70713	-4.4528	-4.28298	1.12271	0.76381	-4.60615	-4.50421	0.41288	0.55348	0.18315	0.79837	-4.17464	-4.33012	-4.39635	-4.71562	-4.38185	-4.25898	-4.60268	-4.39298	-4.54545
YER119C-A	-4.27545	-3.18724	-4.42942	-4.29631	-4.63994	-4.67181	-4.52937	-4.71682	-4.83219	-4.34183	-4.24717	-4.23379	-5.09084	-4.49818	-4.30222	-4.71083	-4.90141	-4.92779	-4.28694	-4.27341	-3.71055	-4.24785	-4.54944	-4.87405	-3.47857	-4.58714	-4.72861	-4.43693	-2.31055	-4.32034	-4.05688	-5.19694	-2.98024	-4.36397	-4.00882	-4.32603	-3.49831	-4.77484	-4.978	-2.54776	-4.10079	-4.10409	-4.57341	-3.50471	-4.26908	-4.27317	-4.6784	-4.27698	-4.11742
YMR008C	0.28601	0.2042	-0.19228	-0.08589	0.05623	0.12189	1.16542	1.08406	1.19281	1.5865	0.99824	1.38448	1.85796	1.75656	1.5455	2.12821	1.89231	1.84381	1.55032	1.33984	0.18901	0.23978	1.87154	1.17491	0.89235	1.36389	0.1432	1.00474	0.03132	-0.00509	2.21754	1.34588	1.08098	1.10689	1.44507	1.62649	0.33497	-0.02925	1.64821	1.68463	1.25511	1.07426	-0.33591	-0.4011	-0.01703	-0.31277	0.1965	0.25679	0.5092
YOR197W	2.2696	2.44521	2.31014	2.12699	2.42101	2.3748	1.98293	1.91595	2.10015	2.18024	2.17349	2.1736	2.08525	2.27438	2.51881	2.19161	2.40644	2.17354	2.09074	1.98417	2.21572	2.03647	2.08204	1.8901	2.305	2.05533	2.06896	2.12004	2.21782	2.03735	1.92648	2.30253	2.35423	2.48041	2.26113	2.3308	2.25692	2.14575	2.07254	2.17173	2.38031	2.61829	2.0824	2.07363	2.19692	2.27126	2.65367	2.4666	2.30094
YKL096W-A	7.18124	7.02051	6.70904	7.00885	6.71679	7.29946	6.12025	6.94761	6.74017	6.64803	6.44064	6.50585	6.35489	6.63798	6.33382	6.13432	6.41165	6.3737	7.14754	7.2199	7.37843	7.33163	7.11294	7.41594	7.45761	7.46275	7.03847	7.38857	7.42907	6.79276	7.38629	6.79825	7.18783	6.58134	7.16865	7.27772	7.2191	7.14997	7.15159	7.45625	7.34417	6.66479	6.57899	6.78379	7.12771	6.92293	7.26248	7.10439	7.02188
YNL081C	1.14153	0.87723	1.21037	0.98276	1.12318	1.02355	1.70361	1.87978	1.80514	1.47033	1.59689	1.82885	1.61645	1.63747	1.83826	1.78025	1.58814	2.26212	1.13296	0.98143	1.60965	1.58957	1.30858	1.76627	0.8068	0.93964	2.32062	1.45341	1.27164	1.20076	0.85027	1.71626	1.338	1.09781	1.33266	1.48997	1.47588	1.47492	1.48957	1.45733	1.48404	1.57142	1.14596	1.32343	1.28	1.44174	1.27484	1.47428	1.96173
YDR532C	-1.73942	-2.21703	-1.54696	-1.53673	-1.38348	-1.86894	-1.73784	-1.21373	-1.75665	-1.98507	-1.92735	-1.88448	-2.03879	-2.23178	-2.15255	-2.3272	-2.30097	-2.096	-1.93122	-1.57944	-2.21198	-1.8834	-2.69889	-1.63265	-1.48053	-2.3613	-1.72076	-2.24864	-2.03481	-1.89522	-2.91748	-3.34311	-2.94252	-2.84356	-2.21869	-1.84237	-1.96144	-1.43838	-2.29282	-1.88725	-1.64891	-1.81329	-1.88215	-2.36628	-1.84076	-1.6932	-1.8278	-1.67272	-1.7229
YDR049W	-0.34031	-0.53374	-0.13331	-0.11515	-0.01899	-0.29922	0.28277	0.22561	-0.10266	-0.06225	0.00387	0.32629	-0.21129	-0.2923	-0.10075	-0.17316	-0.34283	-0.19865	-0.09917	-0.23157	-0.65882	-0.4311	-0.49483	-0.09378	-0.43725	-0.66155	-0.31391	-0.6403	-0.02953	-0.39899	-0.82194	0.16741	-0.14715	0.53628	-0.11104	-0.16602	-0.13738	-0.14163	-0.14756	-0.24564	0.00224	-0.098	0.02005	-0.28491	-0.31846	-0.18284	-0.02042	-0.06675	-0.12569
YNL319W	-4.45316	-4.41989	-4.02815	-4.21393	-4.39551	-4.49585	-4.3804	-4.23479	-4.3254	-3.51442	-4.40492	-3.8641	-4.64006	-4.70402	-4.46436	-4.54872	-4.1036	-4.54721	-3.11914	-4.15054	-3.91546	-3.83319	-3.9308	-4.16059	-4.54582	-4.12544	-3.93884	-3.9125	-3.18677	-4.02867	-3.95907	-3.41729	-4.40583	-3.01748	-4.00702	-3.84185	-3.76154	-3.7349	-3.93705	-3.6481	-3.90956	-3.59639	-3.56777	-4.14719	-3.70798	-3.9707	-4.2844	-4.19627	-4.13484
YBR113W	-3.82422	-4.02267	-4.21158	-3.88898	-4.11723	-3.82807	-3.95773	-3.75647	-4.09749	-2.97611	-4.25662	-3.58265	-3.92046	-3.92453	-3.92768	-4.31767	-4.03153	-3.8406	-4.10681	-3.94853	-3.83699	-4.00556	-4.47088	-3.69937	-4.06883	-3.96191	-3.66619	-3.89065	-4.36994	-3.46335	-4.37411	-4.8359	-4.28701	-3.55301	-3.69466	-3.67148	-4.32334	-3.93974	-4.2293	-3.747	-4.39685	-4.38267	-3.99669	-3.15533	-3.63319	-3.73183	-4.04859	-3.31463	-4.54545
YKL170W	0.28643	0.73068	0.29043	0.74714	0.6683	0.77125	1.43658	1.90926	1.54648	1.90632	1.13911	1.55486	1.71065	1.95623	1.82196	2.08521	1.7463	2.0356	0.86374	0.84427	1.29424	1.24804	1.35798	1.60179	0.74266	0.5893	1.48836	1.07325	0.73548	0.24125	0.98978	1.94882	0.92777	1.57022	0.95095	1.15374	0.88908	1.18216	1.19665	1.18514	1.23825	0.99551	0.56626	1.26936	1.0783	1.29199	0.99615	1.08017	1.57308
YJL043W	-3.34178	-3.38393	-3.34754	-3.25241	-3.354	-3.67358	-3.57252	-3.62986	-3.39249	-3.80813	-3.21024	-3.26984	-3.96337	-3.94251	-4.14141	-4.55979	-4.19222	-4.18963	-2.83926	-3.48695	-2.98831	-3.00765	-2.59885	-3.2741	-3.14963	-3.22442	-3.3545	-3.3793	-3.41922	-2.75885	-2.96402	-3.42383	-2.72471	-1.94186	-3.34656	-3.56983	-3.13381	-3.26935	-3.17214	-3.1802	-3.1601	-3.55914	-3.10303	-2.77139	-3.41047	-3.27057	-3.40804	-3.39996	-2.90087
YGL047W	-0.84324	-0.48395	-0.79877	-0.64677	-0.8543	-0.47807	-0.56594	0.10025	-0.32137	-0.39995	-0.51543	-0.24538	-0.55156	-0.35555	-0.4645	-0.23731	-0.32697	-0.62971	-0.36597	-0.45365	-0.29869	-0.45892	-0.40274	-0.5414	-0.32367	0.13374	-0.51848	-0.51995	-0.34016	-0.83623	-0.32135	0.00879	0.07878	0.2261	-0.39164	-0.45058	-0.26114	0.00855	-0.291	-0.52822	-0.28729	-0.36118	-0.47055	0.07515	-0.35722	-0.50308	-0.05688	-0.6616	-0.2826
YLR006C	-0.04425	0.16312	0.03792	0.00775	-0.20348	0.08146	0.20572	0.32823	0.27821	0.12985	0.27405	0.21953	0.15509	0.21766	0.07639	0.23847	0.2209	0.08233	0.08767	0.30619	0.09678	0.22402	-0.07347	-0.24985	0.47418	0.53591	0.28257	0.26985	0.41295	0.40284	-0.13254	0.0287	0.11561	0.29637	0.37308	0.4035	0.30842	0.59779	-0.16514	-0.13116	0.24665	0.19264	-0.01068	0.38276	0.19011	0.33874	0.34233	0.31685	0.32917
YHR079C	0.20413	0.1551	0.14361	0.04276	0.04419	0.14076	-0.10927	-0.08578	-0.06017	0.05915	0.07263	0.04774	0.17305	0.20489	0.21768	-0.03712	0.22237	0.11897	0.19847	0.09882	-0.05371	-0.2928	0.03206	0.03925	-0.07906	-0.06393	-0.35261	-0.09531	0.03943	-0.1663	0.2361	0.00985	-0.06092	-0.12125	0.17074	0.15548	-0.31057	-0.35906	0.02138	0.28146	-0.09214	-0.04541	0.06306	-0.20553	-0.15055	-0.15669	-0.11036	-0.09739	-0.39292
YPR171W	0.0553	0.08254	-0.01846	0.00804	-0.06918	-0.22307	-0.10484	-0.00426	-0.27333	-0.15971	-0.04814	-0.20451	-0.24	-0.34676	-0.50688	-0.44327	-0.2538	-0.41828	-0.09746	-0.09828	-0.04042	-0.01497	-0.24548	-0.12721	-0.17742	-0.03749	0.0928	-0.11571	0.21596	-0.17652	-0.52725	-0.40168	-0.17226	0.31023	-0.23659	-0.11231	0.09326	0.15631	-0.27813	0.05442	-0.54408	-0.21864	0.1986	-0.03097	-0.04181	-0.07162	-0.27721	-0.1119	0.0665
YML063W	6.30449	5.99161	6.68364	5.80492	6.51724	6.45638	6.28172	6.17977	6.34994	6.13971	6.38517	5.94584	6.1364	6.0038	6.34581	6.07593	6.34719	6.31354	6.06714	5.57943	6.41754	5.47287	5.7723	5.67941	5.71538	5.38293	6.33967	6.11346	6.42585	5.81816	6.0678	5.91557	5.96873	5.82224	6.1065	5.78487	5.81792	5.58921	6.22536	5.41914	6.4134	6.43591	5.85925	6.01494	6.72973	6.27796	6.44649	6.32533	6.60983
YLR178C	-1.00543	-0.97187	-1.18936	-0.75295	-1.35335	-1.17651	-1.15358	-0.83339	-0.84356	-0.98026	-0.65942	-0.81815	-0.54768	-0.9845	-0.75237	-0.63361	-0.70715	-1.17965	-0.9778	-1.41283	-0.84469	-0.01728	-0.21064	-0.75483	-0.60647	0.01763	-0.79012	-0.26505	-1.38934	-1.46222	-0.61298	-0.65081	-0.55502	-0.08122	-1.12732	-1.01481	-0.75432	-0.77232	-0.75393	-1.00569	-0.99722	-0.81989	-1.00742	-0.29214	-1.16719	-1.11464	-0.51635	0.20012	-1.0955
YHL029C	1.06482	1.19963	1.18709	1.09382	0.95484	1.15813	1.376	0.99956	1.34732	1.26926	1.35098	1.22152	1.6515	1.78403	1.53488	1.56232	1.63596	1.6355	1.41384	1.2872	1.15367	1.06086	1.68438	1.36143	0.98815	0.99206	0.89348	1.37391	0.90582	1.34829	1.99158	1.38213	1.25276	1.58734	1.29204	1.44755	0.99471	0.93826	1.328	1.20655	0.99325	0.99001	1.11534	1.20938	1.08874	1.14792	1.13922	1.13548	1.04836
YJL090C	-0.92696	-0.84902	-0.67546	-0.89265	-0.78798	-0.81863	-0.66526	-0.47163	-0.52708	-0.71174	-0.57639	-0.56137	-0.73032	-0.76262	-0.61254	-0.85908	-0.70846	-0.68609	-0.81879	-0.73943	-0.70772	-1.0666	-0.89302	-0.51441	-0.84728	-0.96507	-0.82592	-0.92445	-0.70547	-0.68654	-0.57503	-0.88355	-0.73016	-0.89314	-0.81769	-0.82394	-0.84211	-0.80363	-0.78261	-0.5774	-0.56118	-0.71093	-0.53626	-1.35253	-0.68211	-0.74837	-0.7975	-0.75312	-0.63919
YOR184W	2.69478	2.69881	2.80524	2.85198	2.59441	2.87906	2.7495	2.74368	3.01205	2.57233	3.1267	2.88602	2.14095	2.53719	2.75234	2.4095	2.5737	2.49716	2.73458	2.18554	2.87481	2.8567	2.27243	2.93078	2.98239	2.70241	2.96703	2.85399	2.85202	2.51227	2.77082	2.33179	2.82163	2.23864	2.44723	2.5462	2.55997	2.57299	2.36679	2.86761	2.78716	3.21036	2.59134	2.82201	2.66152	2.76688	3.03313	2.79117	3.40892
YBR008C	-0.77899	-0.87743	-1.20176	-1.04579	-0.96375	-1.12386	-0.50315	-0.87992	-0.81193	-0.24767	-0.68638	-0.58852	-0.83625	-0.94321	-1.22633	-0.53472	-0.98073	-0.836	0.02658	0.01298	-0.85472	-0.78312	-0.09254	-0.63193	-0.81905	-0.51858	-1.4979	-0.97855	-0.85445	-0.99423	0.71125	-0.27359	-0.17	-0.14887	-0.70514	-0.82744	-0.82417	-0.93403	-0.47288	-0.41707	-0.98836	-1.31524	-0.91653	-0.60118	-1.10816	-1.08409	-0.95187	-1.28022	-1.20468
YDR372C	1.69355	1.76915	1.73844	1.63253	1.78473	1.64309	1.59876	1.43613	1.79579	1.45117	1.78325	1.59352	1.56167	1.7791	1.75965	1.68969	1.53363	1.82175	1.36993	1.57993	1.34666	1.53312	1.27068	1.20953	1.72611	1.73534	1.74534	1.44642	1.61128	1.74898	1.77138	0.77596	1.15592	0.42552	1.84737	1.60337	1.54209	1.36053	1.42194	1.54329	1.316	1.71256	1.44035	1.05355	1.76832	1.69654	1.55369	1.86498	1.8956
YHR218W	3.16812	3.00727	3.18253	3.29904	3.112	3.25248	2.30968	2.24152	2.49403	2.66977	2.4628	2.51748	2.31612	2.45112	2.2075	2.22571	2.17074	1.99514	2.96084	3.34247	2.00497	2.51816	3.12411	2.74419	3.33495	3.42033	2.25082	2.51682	2.96061	3.71027	3.26382	3.64239	2.79915	3.06629	2.88012	2.91032	2.17937	2.14821	3.12297	2.90475	2.65549	2.7868	3.43054	3.62137	2.98768	3.87045	2.75226	2.89201	2.70372
YMR203W	3.16903	2.94375	2.88857	3.01409	3.08051	3.04472	3.4817	3.49799	3.56743	3.76198	3.63056	3.75976	4.2082	4.14706	4.00409	4.08556	4.22363	3.98629	3.33566	3.29179	3.1173	3.32536	3.7618	3.10578	2.84014	3.35812	3.08103	3.82826	2.73249	2.99426	4.76277	3.04738	2.73756	2.83772	3.29372	3.35245	2.84879	3.07123	3.46303	3.08835	3.47946	3.5126	3.06988	3.10831	3.20834	3.14021	3.526	3.70715	3.23213
YIR008C	0.10745	0.19323	0.17013	0.14404	0.09701	0.22575	0.03427	0.20063	0.29641	0.11434	0.24614	0.29013	0.04056	0.5882	0.42461	0.19573	0.15943	0.21815	0.39724	0.18565	0.26648	-0.45464	-0.02396	0.34931	0.07379	-0.23856	0.16594	-0.19779	0.31728	0.17139	0.26695	0.40759	0.66122	0.34674	0.51129	0.36865	0.22629	0.12618	-0.03604	0.03327	-0.08705	-0.02076	0.14583	0.452	-0.02341	0.18627	0.32362	-0.10252	0.28671
YBL024W	2.3316	2.31247	2.5835	2.41239	2.5548	2.53599	2.78271	3.06711	2.94549	2.86051	2.91094	2.96339	2.54321	2.86786	2.7003	2.3689	2.69304	2.66289	2.46788	2.68531	2.66612	2.1315	2.22908	2.68049	2.30892	2.33839	2.4467	2.57697	2.46982	2.65402	2.01614	1.93292	2.13527	1.28188	2.38021	2.6291	2.16366	2.39198	2.22266	2.75231	2.56265	2.76839	2.47386	1.91636	2.97193	2.7225	2.69693	2.53837	2.88257
YDR317W	-3.59203	-3.83808	-3.06929	-3.53593	-3.27154	-3.17049	-4.77989	-4.54889	-4.67385	-4.62601	-4.60682	-4.86568	-4.10045	-4.06192	-4.20687	-4.44516	-3.96088	-4.04647	-4.36965	-4.19488	-4.67449	-4.49321	-4.41898	-4.30653	-4.35427	-4.68645	-3.55117	-3.54815	-3.51164	-4.07393	-4.03644	-4.56215	-3.87459	-4.00097	-4.65643	-4.54085	-3.24976	-3.41342	-4.57117	-4.49753	-4.32995	-4.65459	-4.10136	-4.13631	-3.5184	-4.33165	-3.45218	-3.41703	-4.63062
YOL166C	-4.42562	-4.40167	-4.15406	-4.58762	-4.43702	-4.19039	-4.34415	-4.41839	-4.35688	-4.15994	-4.16166	-4.66362	-4.34766	-4.59712	-4.71566	-4.4138	-4.50133	-4.75148	-4.66265	-3.93849	-4.47883	-4.74768	-4.93102	-4.83712	-4.8749	-4.74345	-4.22335	-5.11018	-2.69074	-4.47711	-3.8859	-2.92122	-3.96868	-4.81481	-3.63877	-4.29388	-4.86404	-4.93969	-4.07704	-4.54837	-4.62706	-4.75264	-3.76331	-4.44431	-3.85255	-4.36104	-3.84258	-4.04724	-4.78481
YJL087C	-0.26564	-0.28389	-0.14869	-0.21508	0.00071	-0.17215	-0.27132	-0.30578	-0.39972	-0.24384	-0.21019	-0.222	-0.65365	-0.47463	-0.4987	-0.6204	-0.61317	-0.47896	-0.66787	-0.36342	-0.76584	-1.01159	-0.87398	-0.61203	-0.93177	-1.0908	-0.41878	-0.75005	-0.54648	-0.62009	-0.69415	-0.32725	-0.72661	-0.57809	-0.42666	-0.41257	-0.74211	-0.84464	-0.61685	-0.44081	-0.2417	-0.31726	-0.57043	-0.57841	-0.37198	-0.4162	-0.31523	-0.36003	-0.48675
YJL038C	-4.19521	-4.09309	-4.30293	-4.24113	-3.95398	-3.97285	-4.07398	-3.91954	-4.23271	-4.42568	-4.08171	-3.77351	-4.24466	-4.63061	-4.35916	-3.94375	-4.23998	-3.79666	-3.6962	-3.43	-4.20861	-3.9846	-4.20954	-4.08781	-3.93411	-4.26171	-4.46289	-4.43693	-3.48938	-3.96236	-4.39452	-3.96879	-3.70343	-3.18927	-4.03849	-3.67766	-3.67975	-3.65044	-4.4117	-4.10781	-3.99972	-3.94752	-4.62906	-4.6542	-4.27759	-3.79829	-4.20777	-3.97479	-4.16009
YDR043C	-1.81434	-1.80387	-1.86271	-1.8927	-1.77948	-2.32188	-0.96356	-1.36902	-1.06706	-1.33634	-1.04344	-1.20839	-0.88907	-1.10939	-1.19254	-1.04638	-1.15175	-1.09966	-1.73535	-1.38818	-0.97895	-1.01472	-1.16942	-1.66998	-1.04129	-1.04984	-1.61701	-1.45621	-1.79659	-1.48139	-1.56448	-1.2461	-1.31329	-2.3777	-1.47431	-1.45198	-1.06243	-1.12698	-0.94021	-0.83222	-1.55526	-1.10177	-1.68588	-0.8451	-0.99886	-1.77711	-1.53917	-0.96523	-1.62269
YHR028C	0.80056	0.73284	0.70902	0.78165	0.76653	0.96998	-0.5471	-0.5144	-0.48959	-0.45073	-0.41795	-0.66654	-0.66586	-0.71352	-0.47913	-0.61502	-0.60755	-0.7705	0.59801	0.6065	0.69929	0.6041	-0.13865	-0.61884	-0.20937	-0.09836	0.0384	0.19514	0.37898	-0.35398	0.08675	-0.5819	-0.57751	-0.73455	0.50357	0.34904	-0.39731	-0.14661	-0.44485	-0.327	0.82888	0.69034	-0.54447	-0.57687	-0.08789	-0.15091	0.00255	0.2343	0.59871
YOR340C	1.96452	2.01288	2.14292	2.20624	2.32217	2.01219	2.62997	2.6015	2.10624	2.52674	2.51903	2.79737	2.06978	2.23512	2.41979	2.47257	2.15364	2.01787	2.15771	2.17217	2.07834	1.64	1.53321	2.47508	2.0796	1.72993	2.18166	1.64692	2.37286	2.02149	1.20359	2.65683	2.22633	2.2812	2.00227	1.89477	1.95779	2.23368	2.09768	2.36211	2.37122	2.24814	2.44061	2.0048	2.59698	2.33314	2.50555	2.04137	2.92227
YCL044C	1.33376	1.19314	1.08725	1.24126	0.9945	1.31674	1.2558	1.75086	1.12323	1.23851	1.05919	1.14108	1.74346	2.05751	1.56641	1.58235	1.62157	1.51393	1.56234	1.62991	1.33982	1.76661	2.09051	1.53683	1.24037	1.86336	1.11237	1.8138	1.4508	1.39998	2.39443	1.56684	1.1407	1.60573	1.65048	1.60085	1.48745	1.72641	1.62259	1.3968	1.3326	1.15269	1.35183	1.92591	1.23986	0.95706	1.23115	1.42469	1.17684
YFR022W	-0.98408	-1.01021	-1.18747	-1.04378	-1.24073	-0.9129	-1.61583	-1.57185	-1.59664	-1.62864	-1.55744	-1.4026	-1.07399	-1.31875	-1.57253	-1.2799	-1.27614	-1.54821	-0.81976	-1.17371	-1.19377	-0.83003	-0.25235	-1.26593	-1.16001	-0.52574	-1.62773	-1.36707	-1.67463	-0.90262	-0.36324	-1.24734	-0.89428	-0.6875	-1.05768	-1.2841	-1.15654	-1.17218	-0.64108	-0.96928	-1.3887	-1.4357	-0.85518	-0.83488	-1.62896	-1.12376	-1.38582	-1.05967	-1.70612
YEL072W	-2.24648	-1.73081	-2.00972	-1.852	-1.74002	-2.54164	-1.6644	-1.51347	-1.685	-1.87339	-1.52221	-1.3768	-2.46058	-2.75517	-2.33895	-2.06291	-2.58942	-2.15235	-1.38553	-1.69441	-1.66659	-1.70622	-1.8466	-2.27503	-1.60531	-2.00857	-0.98791	-1.36657	-1.67829	-1.8276	-0.75116	-0.09611	-0.70503	-1.34099	-1.0472	-1.72948	-1.73457	-1.83567	-1.73662	-1.88771	-1.61215	-1.63066	-1.75718	-1.43475	-0.92288	-1.73783	-1.59966	-1.86518	-1.878
YIR010W	-0.23508	-0.42091	0.01504	-0.02302	-0.12916	-0.38043	-0.06019	-0.00794	-0.2904	-0.05384	-0.26265	0.1637	-0.47657	-0.46599	-0.43812	-0.7132	-0.7331	-0.67883	-0.36828	-0.24639	-0.44688	-0.13342	-0.47309	-0.01958	0.01605	-0.09665	0.03057	-0.02369	0.07279	0.11689	-0.76384	-0.18719	-0.09591	-0.23196	-0.37332	-0.24915	0.05527	0.28086	-0.1327	-0.07153	-0.05677	0.02723	0.23939	-0.30847	-0.0126	0.04913	-0.29701	-0.08938	-0.14583
YBL008W	-0.84265	-0.71316	-0.56771	-0.65898	-0.77226	-0.75224	-0.65596	-0.55318	-0.52195	-0.72562	-0.58032	-0.56806	-0.79147	-0.71808	-0.85234	-0.76439	-0.807	-0.89529	-0.66287	-0.97786	-0.90787	-1.12161	-0.75554	-0.7036	-0.99257	-1.18924	-0.74051	-0.85861	-1.05797	-0.58375	-0.70436	-0.72452	-0.72661	-0.97269	-0.48109	-0.56479	-0.97964	-0.87602	-0.8463	-0.67033	-0.81134	-0.69387	-0.89309	-0.86695	-0.80372	-0.81688	-0.60804	-0.87652	-0.67225
YMR178W	0.51473	0.87468	0.80002	0.6823	0.81008	0.78882	0.22135	0.27675	0.51414	0.28045	0.47683	0.49239	-0.07291	-0.11559	-0.00945	0.12362	0.15304	0.28297	0.39849	0.32722	0.45207	0.33755	0.09225	0.18532	0.86956	0.61179	0.33503	0.33323	0.43903	0.3472	0.10107	0.3456	1.02004	0.65784	0.48694	0.46918	0.82667	0.76144	0.13463	-0.20921	0.72618	0.89319	0.56472	0.97736	0.79822	0.73398	1.11621	0.61595	0.62844
YOL008W	-0.3969	-0.30203	-0.2507	-0.189	-0.3666	-0.35143	-0.20788	-0.32835	0.02239	-0.23169	-0.16931	-0.16613	0.43804	0.46351	0.03915	0.10934	0.53363	0.12983	-0.02554	-0.25702	-0.26921	-0.16918	0.15815	-0.29008	-0.38409	-0.09273	-0.48963	-0.03998	-0.30881	0.05354	0.00342	0.0905	-0.15647	-0.6695	-0.1224	-0.13628	-0.39201	-0.23928	0.21496	0.06171	-0.1512	0.02031	-0.29449	-0.25571	-0.27322	-0.07302	0.1011	-0.36098	-0.36716
YHR017W	-0.18775	-0.1343	-0.13485	-0.43443	-0.28689	-0.02674	0.07387	-0.22784	-0.10659	-0.10915	-0.03591	-0.22725	0.20544	0.26189	0.28299	0.32261	0.3485	0.16752	-0.2371	-0.33529	0.164	-0.28658	-0.03841	-0.47922	0.08437	0.19567	-0.19644	-0.20036	-0.06789	0.0464	0.3605	-0.05472	-0.19158	0.40943	-0.25541	-0.23188	0.27418	0.01204	0.02401	-0.15952	0.10332	-0.01322	-0.03483	-0.69041	-0.16053	-0.00291	-0.22674	-0.02156	-0.06483
YMR095C	-3.87156	-4.48212	-4.04094	-4.09427	-4.12383	-4.05395	-3.82607	-3.76723	-3.96243	-4.03756	-4.13285	-3.96151	-4.64741	-4.71405	-4.52918	-4.10361	-4.55122	-4.3475	-3.71011	-4.03491	-4.41501	-3.90923	-3.55597	-4.38694	-4.35398	-4.06952	-4.34637	-3.19232	-3.85865	-3.92086	-1.81833	-3.68226	-3.89373	-4.07482	-3.94613	-3.89458	-4.30324	-4.52405	-3.8212	-4.13194	-3.07471	-3.56507	-3.72202	-3.59563	-4.31756	-4.36314	-4.36708	-3.33925	-3.7873
YKR101W	-2.13391	-1.98631	-1.80017	-1.9953	-1.93579	-2.38133	-2.0992	-1.96393	-2.04978	-2.36955	-2.12638	-1.98229	-2.73088	-2.84397	-2.65491	-2.48427	-2.73455	-2.87461	-2.24932	-2.13145	-2.04396	-2.13972	-2.45543	-2.49223	-1.91868	-2.39217	-1.7726	-2.26541	-1.88603	-1.90921	-2.52433	-2.27475	-1.92216	-2.65049	-2.16647	-2.32927	-1.96582	-1.97703	-2.156	-2.45618	-1.92915	-1.85621	-1.94844	-2.05411	-1.99066	-1.98089	-2.02706	-1.93518	-1.86306
YHR198C	-0.42356	-0.23559	-0.51081	-0.30602	-0.69095	-0.54637	-0.29889	-0.14484	-0.08385	-0.07374	-0.19639	-0.09873	0.41269	0.26448	0.2798	0.82271	0.06969	0.51267	-0.1315	-0.60129	0.00233	0.28577	0.74205	-0.27903	-0.77172	-0.28735	0.0341	0.43826	-0.60282	-0.55686	0.44805	-0.231	0.02121	-0.10081	-0.48109	-0.61775	0.30769	-0.17433	0.28401	-0.41704	-0.25596	-0.17391	-0.89044	-0.14531	-0.12123	-0.61374	-0.14923	-0.20073	-0.30871
YOR076C	-0.5391	-0.59101	-0.26674	-0.52831	-0.48858	-0.57481	-0.60303	-0.685	-0.60211	-0.58989	-0.55017	-0.51507	-0.7917	-0.8381	-0.59481	-0.53518	-0.81676	-0.73429	-0.88734	-0.77432	-0.41746	-0.99675	-1.0255	-0.70605	-0.60736	-1.01325	-0.3785	-0.85182	-0.37183	-0.46009	-1.1588	-0.83002	-0.36443	-1.40423	-0.29959	-0.69949	-0.45728	-0.50445	-0.84988	-0.7949	-0.72438	-0.55149	-0.47522	-0.89103	-0.35793	-0.51375	-0.39351	-0.63362	-0.42794
YGL015C	-4.14991	-3.45936	-4.01255	-3.91007	-3.40198	-3.91371	-3.69851	-3.62124	-3.75576	-3.74288	-4.20182	-4.02044	-4.08214	-3.61754	-4.26658	-3.90702	-2.8749	-3.97866	-3.29017	-3.78085	-3.79544	-3.78955	-3.77837	-3.23727	-3.64441	-3.98952	-4.119	-3.79312	-4.1722	-3.84523	-4.21344	-3.99736	-3.84039	-4.4949	-3.98466	-3.70952	-4.00734	-3.95118	-3.84955	-3.57936	-4.36575	-3.84901	-4.24427	-3.77671	-3.53491	-3.70891	-3.39001	-3.76136	-3.24448
YNL219C	1.86646	1.66702	1.58482	1.74073	1.61503	1.6973	2.00414	1.51969	1.69698	2.01585	2.02548	1.90541	2.66761	2.33158	2.17042	2.326	2.48391	2.29189	1.96023	1.8969	1.84654	1.91267	2.32416	1.7326	1.62578	2.07746	1.61007	2.01147	1.89314	1.98601	2.79308	1.61414	1.62076	1.27348	2.16621	2.10227	1.85974	1.42485	2.16586	1.68705	1.80141	1.89514	1.843	1.40893	1.71622	1.81909	1.6819	1.88192	1.8457
YLR210W	-1.19428	-1.22328	-1.11979	-1.23832	-1.13293	-1.49578	-1.41803	-1.39351	-1.35015	-1.42479	-1.25943	-1.27649	-1.28293	-1.49379	-1.26256	-1.38354	-1.24372	-1.4957	-1.28599	-1.33184	-1.09514	-1.46186	-1.53776	-1.42955	-1.17732	-1.80131	-1.4396	-1.77883	-1.0669	-1.35342	-1.52496	-1.24114	-0.76056	-1.40254	-1.29182	-1.50755	-1.1587	-1.30996	-1.19408	-1.05351	-1.26961	-1.06831	-1.24196	-1.36835	-1.19834	-1.07247	-1.24306	-1.33743	-1.27174
YIL034C	2.11358	2.23187	2.18424	2.01199	2.09585	2.26613	2.14829	2.18889	2.04167	2.06943	2.04206	1.98711	2.35021	2.34697	2.5387	2.43508	2.47517	2.47021	2.46128	2.10049	2.55359	2.65921	2.50788	2.12915	2.42806	2.76819	2.52746	2.65084	2.32453	2.36696	2.90576	1.80643	1.81044	1.91492	2.31998	2.23727	2.67689	2.778	2.43041	2.47158	2.31269	2.86032	2.45698	2.42794	2.28747	2.23576	2.25045	2.4666	2.31872
YLR148W	-0.73758	-0.83664	-0.82895	-0.94081	-0.63725	-0.9429	-0.93805	-1.61632	-0.75607	-0.83335	-0.84774	-0.9781	-0.97051	-1.15993	-0.79605	-0.93865	-1.05841	-0.79681	-1.62234	-1.23766	-1.12514	-1.41494	-1.78858	-1.50322	-1.12494	-1.46217	-0.98503	-1.29961	-1.26118	-1.05638	-1.71332	-1.44197	-1.32033	-1.995	-1.19043	-0.97938	-1.26605	-1.53942	-1.3163	-1.12872	-0.80749	-0.8227	-0.97894	-1.54671	-0.93194	-0.95782	-0.65453	-0.97038	-0.90931
YOR342C	1.85533	1.58749	1.87158	1.69934	1.67752	1.67972	2.37209	2.24048	2.33447	2.21427	2.38245	2.31385	2.22143	2.15099	2.09065	1.88035	2.0646	2.39211	1.82529	2.01315	1.73685	1.422	2.24043	2.61891	1.78741	1.38859	2.14242	1.38644	1.95811	2.07447	1.7268	1.83021	2.36576	1.41309	2.13703	2.203	1.89708	1.57729	2.23926	2.46609	2.3381	2.07387	1.79043	1.83309	2.32027	2.04862	2.10492	1.96458	2.58911
YOL070C	0.59168	0.58958	0.50819	0.48789	0.53412	0.40283	0.46433	0.63488	0.06115	0.27104	0.22743	0.32661	0.15529	0.39319	0.2465	0.24623	0.49878	0.29305	0.74822	0.6488	0.1683	0.49312	0.09964	0.65215	0.57633	0.38646	0.68395	0.23688	1.06188	0.47919	-0.7713	0.27119	0.63022	0.74225	0.60334	0.68724	0.79304	0.8674	0.52852	0.51436	0.5947	0.40011	0.51232	0.89828	0.40604	0.58569	0.9984	0.52479	0.71138
YDL160C	2.77354	2.63679	2.51832	2.48237	2.49461	2.51616	2.15485	1.93842	2.37243	2.35659	2.50008	2.00359	2.67926	2.37714	2.35232	2.60344	2.47649	2.13536	2.15967	2.26889	2.84886	2.79624	2.1812	1.80524	2.91278	2.65872	2.61809	2.79554	2.10543	2.66312	3.10579	1.80266	1.77745	0.76462	2.37312	2.4316	2.45427	2.31995	2.20004	2.47266	2.81647	2.76598	2.60556	1.91725	2.89682	2.5468	2.95285	2.99186	2.46442
YIL043C	3.33531	3.78646	3.50894	3.58108	3.45618	3.55395	3.52057	3.68278	3.35039	3.63445	3.51017	3.6852	4.15186	4.11019	3.75329	4.19072	4.19412	4.27329	3.76576	3.67513	3.77862	3.80016	3.50815	3.93181	3.353	3.38585	3.11848	3.27686	3.49356	3.43546	3.88895	3.70308	3.53239	3.89762	3.71058	3.78084	3.61999	3.77594	3.44904	3.40891	3.76271	3.84684	3.29402	3.77164	3.34199	3.39349	3.89431	3.88148	3.90828
YLR124W	-3.63627	-4.47208	-3.48146	-4.00241	-3.86485	-3.25385	-3.69199	-4.32732	-3.71153	-4.47103	-3.15232	-3.99722	-3.66566	-3.77459	-3.93145	-3.24098	-4.26543	-3.66311	-3.83478	-4.00403	-4.55281	-4.77255	-4.16343	-4.5348	-4.83008	-4.66714	-3.34526	-4.86013	-4.0528	-4.63893	-3.9493	-4.23156	-3.64428	-3.16535	-3.01313	-3.52758	-4.47411	-4.20524	-4.07798	-4.01382	-4.31974	-4.18554	-4.32907	-3.77448	-4.15058	-4.21992	-4.62772	-4.52999	-3.997
YGR231C	1.66698	1.66654	1.57392	1.89547	1.58961	1.78113	2.12628	1.80211	1.84452	2.03187	1.7982	1.87108	1.89663	1.67248	1.81837	2.09206	1.86322	2.26914	1.49085	1.58294	1.59721	1.8882	1.85288	1.34072	1.702	1.58626	2.36289	1.70579	1.81112	1.96377	1.83702	2.2259	1.39276	1.75145	1.64935	1.40886	1.93718	1.64106	1.7916	1.56004	2.09013	2.2179	1.62738	1.64223	2.08043	1.7269	2.21593	2.08171	2.37742
YPR202W	2.24779	1.8614	1.99275	2.32704	2.40941	2.40945	1.49787	1.45837	1.70716	1.49165	1.41491	1.51859	0.78412	1.08751	1.01749	0.85665	0.6872	0.61887	2.31178	2.61298	1.33139	1.62522	2.02815	1.38153	2.5708	2.63705	1.41269	1.71043	2.11265	2.37084	2.54819	1.37051	1.20697	0.84237	2.10755	2.09713	1.18663	1.04373	2.00071	1.89631	1.72412	2.08298	2.8432	1.75944	2.13969	2.70889	1.77514	2.07273	1.82523
YMR266W	1.96177	1.76628	1.87392	1.84035	1.87764	1.98055	1.21456	0.96055	1.10367	1.12557	1.28668	1.18013	-3.54612	-4.02931	-4.49106	-4.71103	-4.20636	-4.33792	2.61091	2.51674	2.41399	2.34271	1.55193	1.85753	2.14631	2.26957	0.7745	1.29631	2.1283	2.58435	2.41013	1.953	1.92642	2.08645	2.59784	2.60029	2.18801	2.2358	2.84769	3.06836	1.67451	1.59434	1.74968	1.21897	1.74063	2.31972	0.36003	0.53194	0.517
YNL021W	-0.01351	-0.00842	0.10809	0.19261	0.25002	0.29621	-0.04403	-0.35348	-0.27922	-0.06923	-0.00163	0.1238	0.05397	-0.26131	-0.02287	-0.35601	-0.2358	-0.3365	-0.18565	0.17224	-0.21424	-0.40038	-0.13722	-0.02472	-0.22214	-0.35348	-0.17336	-0.05325	-0.31717	-0.19691	0.00841	-0.25179	-0.35873	0.15192	-0.17387	-0.02425	-0.30915	-0.25968	-0.34423	-0.17422	0.07147	-0.14022	-0.05345	-0.68357	0.02134	-0.00608	-0.08295	0.10853	-0.18922
YGR034W	6.47653	6.13753	6.50198	5.82553	6.05308	6.07687	5.99442	6.14489	6.41446	6.08905	6.23525	5.78024	6.29955	6.09783	6.19378	5.85502	6.4485	6.06918	6.0692	6.17499	5.90585	5.75309	5.62114	5.59148	5.26498	5.53162	6.57654	6.24433	6.03377	5.99494	6.52712	5.87127	5.1932	5.82919	6.35095	6.19026	5.36774	5.59763	6.51137	5.59258	6.15251	6.17507	5.89852	5.9448	6.43379	6.26099	6.28774	6.3395	6.52497
YPL107W	-0.84963	-0.41324	-0.57725	-0.74813	-0.78678	-0.78608	-0.07026	0.17201	-0.50707	-0.6137	-0.59711	-0.31249	-0.65856	-0.87701	-0.80036	-0.52623	-0.57039	-0.49434	-0.68576	-0.26135	-0.83689	-0.5133	-0.91303	-0.47684	-0.28984	-0.45813	0.02485	-0.38625	-0.26283	0.2658	-1.50474	-0.19513	-0.42521	0.31938	-0.58906	-0.26934	-0.49599	-0.25968	-0.73574	-0.67351	-0.30468	-0.48047	-0.98801	-0.59077	-0.46355	0.42623	-0.47892	-0.26058	-0.18627
YGR088W	-2.2047	-2.48533	-2.12988	-1.68364	-2.43958	-2.82392	-2.55483	-2.441	-2.37203	-2.0305	-1.5949	-2.30012	-1.58779	-2.58347	-2.10085	-2.40857	-2.63395	-2.8788	-2.37122	-2.66704	-1.9207	-1.62032	-1.6067	-1.97422	-2.55982	-2.51006	-1.98272	-1.19782	-2.98175	-2.9442	-2.30061	-1.72283	-2.4583	-2.50577	-2.00361	-2.44049	-2.34638	-2.38472	-2.07173	-2.05294	-2.01916	-1.78096	-2.85851	-1.97381	-2.3264	-2.16478	-1.76841	-0.16943	-2.10905
YHR173C	-3.60159	-3.65583	-3.64478	-3.78857	-3.57923	-3.98728	-3.86783	-3.9014	-3.86007	-4.31138	-3.80791	-4.08034	-3.69512	-4.19325	-3.82552	-4.71195	-4.23235	-4.08071	-3.38679	-4.09198	-3.16105	-3.78054	-4.05422	-4.17599	-3.56031	-3.43088	-3.13215	-3.69087	-3.42235	-3.4015	-3.0447	-2.57927	-3.53309	-4.38208	-3.01026	-4.20047	-3.17434	-3.66583	-3.39878	-3.72248	-3.51828	-3.67193	-3.48797	-3.72213	-3.51852	-3.65389	-3.82449	-3.52668	-3.56488
YCR063W	0.35975	0.51912	0.35404	0.51066	0.35861	0.4419	0.00488	0.10164	0.31799	0.27104	0.43427	0.6969	0.28454	0.39662	0.27634	0.06163	0.24031	-0.3307	0.89219	0.29264	0.69129	0.13928	0.23659	0.82833	0.28088	0.36912	0.3677	0.52903	0.43841	0.34189	0.82664	0.69435	0.71557	1.37592	0.91687	0.7085	0.19516	0.54204	0.11853	0.77522	0.60094	0.06	0.77774	1.58711	0.01012	0.27936	0.09844	0.12254	0.31787
YHR073W-A	1.15521	1.03268	1.27932	0.61526	1.14431	1.35073	1.44524	1.54737	1.50626	1.35479	1.24637	1.43179	1.41921	1.66119	1.56474	1.30325	1.71567	1.75884	1.27271	1.40529	1.35301	1.14967	1.23549	1.57684	1.19892	1.14069	1.47469	1.4225	1.38433	1.06193	1.21551	1.09048	1.07204	1.10269	1.32384	1.30064	1.32147	1.31069	1.1602	1.28991	1.5815	1.45902	1.47129	1.22585	1.34519	0.95196	1.3221	1.36054	1.28206
YDL048C	0.31292	0.16615	0.11415	0.19303	0.36048	0.4666	0.50477	0.25919	-0.34633	0.05194	-0.01147	0.43902	0.03065	0.10426	0.2164	-0.36275	-0.39018	-0.27463	0.08505	-0.46366	1.50906	0.85268	1.48729	1.77349	0.55862	0.44184	1.2096	1.4836	-0.40709	0.20914	1.05802	0.74227	-1.15293	-0.69627	0.34006	0.28238	1.15753	0.6927	1.62441	2.46943	1.32472	0.13901	-0.55273	-0.34581	1.14177	-0.2922	0.26728	0.83164	0.35135
YML092C	2.44181	2.56544	2.44106	2.56299	2.34081	2.60228	2.63392	2.54595	2.85628	2.66606	2.63369	2.55827	2.47749	2.75964	2.62019	2.6103	2.71061	2.65099	2.51222	2.62698	2.79364	2.86011	2.82988	2.64147	2.57089	2.74803	2.60437	2.56887	2.58262	2.62533	2.88176	2.61329	2.76723	3.05673	2.60688	2.77036	2.81303	2.79326	2.68276	2.48111	2.6353	3.00864	2.4341	2.86654	2.86918	2.90524	2.714	2.95754	2.79931
YPR097W	0.71156	0.60128	0.7836	0.53473	0.79414	0.51918	0.45036	0.0978	0.28675	0.41205	0.36695	0.24991	0.48386	0.34806	0.53166	0.58275	0.62334	0.5449	0.05772	0.28647	0.2586	0.10379	0.10916	0.14677	0.44425	0.05899	0.16918	0.14935	0.33326	0.17969	-0.23641	-0.11862	0.26188	0.12361	0.33732	-0.00979	0.4049	0.21715	0.22902	0.45788	0.5042	0.51825	0.26652	0.11825	0.30567	0.48188	0.41715	0.41442	0.31331
YBR201C-A	-0.96042	-0.40119	-0.45974	-0.52711	-0.63068	-0.33687	-1.46503	-1.1126	-1.08086	-1.11324	-0.64901	-1.5401	-0.99783	-0.99618	-1.2778	-1.52887	-0.64515	-1.68292	-0.11853	-0.2595	-0.6364	-0.80632	-0.96597	-1.12003	-0.6122	-0.47025	-1.47416	-0.76637	-0.7078	-0.36433	0.47409	0.163	-0.54124	-0.18387	-0.1539	-0.19951	-1.06594	-1.12637	-0.94927	-1.33609	-0.42552	-0.91618	-0.38263	-1.55491	-1.23966	-0.616	-0.48356	-0.60914	-1.32495
YNL056W	0.79066	0.99512	0.68411	0.70693	0.59456	0.79405	1.14153	1.55741	1.40734	1.4819	1.36344	1.37119	0.82345	0.93971	0.78037	0.6061	0.86522	0.97347	0.88468	1.0751	0.12865	1.02869	0.59359	1.2038	1.36534	1.12901	0.51977	0.27658	0.62706	1.00311	0.71449	0.81829	0.69643	1.27689	0.77685	1.1756	0.76954	1.28271	1.16824	1.26177	0.8591	0.65606	0.68786	0.96148	1.02463	1.24659	0.85661	0.73735	0.84728
YDL025C	-0.49497	-0.76897	-0.70089	-0.46562	-0.62864	-0.59055	-0.8327	-0.67961	-0.8483	-0.8723	-0.92777	-0.88633	-0.6041	-0.51422	-0.71167	-0.39413	-0.38111	-0.66513	-0.59659	-0.87503	-0.24984	-0.23673	-0.60485	-0.90868	-0.43025	-0.30923	-0.34302	-0.49341	-0.85161	-0.59452	-1.01055	-0.49436	-0.43534	-0.41269	-0.79814	-0.91695	-0.22414	-0.48976	-0.76978	-0.80923	-0.83461	-0.48362	-0.62752	-0.93024	-0.49329	-0.74562	-0.78192	-0.41329	-0.57003
YAL020C	0.14885	0.18432	-0.02073	0.03842	-0.01222	-0.12005	0.36651	0.43492	0.33018	0.59981	0.34906	0.69929	0.48898	0.36473	0.23956	0.40131	0.10595	0.01846	0.347	-0.01955	0.26639	0.39572	0.71348	0.05405	0.10323	0.66631	0.04682	0.50103	0.09977	0.08272	1.44229	0.54542	0.51913	0.98542	0.46293	0.06599	0.42491	0.56603	0.6366	0.18281	0.08071	0.09974	0.49379	0.87862	-0.13202	0.2004	0.1746	0.16249	-0.04703
YDL243C	-0.85729	-1.16466	-0.8936	-0.95475	-0.73853	-0.48733	0.44895	0.20909	0.30715	0.51409	0.13406	-0.13454	-0.31803	-0.35158	-0.41047	0.52404	-0.49774	-0.66011	0.69685	1.6256	-0.64274	-0.25268	0.13802	-0.18873	-1.50828	-1.36646	-0.12588	-0.37286	-1.22765	-1.49592	1.81736	1.27859	-0.71884	0.06046	-1.32253	-1.44223	-1.00637	-1.26058	0.04125	-0.52055	-0.7821	-0.90202	0.41743	-0.65216	-0.92934	-1.29935	-1.31722	-1.01477	-1.60948
YFL017C	0.86969	0.72381	0.92145	0.87014	0.53109	0.67614	0.59034	0.74043	0.51597	0.36627	0.50566	0.27254	1.13218	0.93705	0.87425	0.69421	0.79816	0.55415	-0.13798	0.6404	0.49053	1.09298	0.71817	0.53972	0.78672	0.94311	1.06405	1.00319	0.30415	1.00434	-0.0582	-0.09728	-0.1211	-0.52948	0.04551	0.09241	0.50785	0.32808	1.05216	0.77972	0.85626	1.02677	0.28481	0.24175	0.6465	0.66401	0.49981	0.94056	0.92724
YGL197W	0.84833	0.74698	0.83534	0.82781	0.72993	0.89091	1.00777	1.11094	0.97981	0.99066	1.08208	0.93913	0.67781	0.80604	0.72172	0.88856	0.87888	0.84726	1.0371	1.03809	1.1109	1.37485	0.97643	0.70858	1.08922	1.01974	0.87506	1.1214	1.12158	0.85977	0.80165	0.53867	0.46343	0.61829	1.05732	0.98835	0.83057	0.92461	0.86656	0.77308	1.28086	1.34612	1.22647	1.00462	1.03594	0.73559	0.88481	1.07346	0.63839
YHR092C	-1.00952	-1.48268	-1.69865	-0.78481	-1.06189	-0.81959	0.06453	-0.30422	0.13836	0.00161	0.62403	-0.49603	-0.55459	-0.66853	-0.85377	-0.87912	-0.52579	-1.00043	0.0386	-0.15973	0.56376	1.35911	1.19561	1.90785	-0.05847	0.53924	0.48329	1.31115	-1.04463	0.00958	-0.93554	-0.78681	-1.35589	-0.82452	-0.70906	-0.37387	-0.39226	-0.57137	0.55311	1.05113	-0.4535	0.28492	-1.40196	-0.88986	0.8896	0.63942	-0.52216	-0.26426	-0.00602
YLL011W	1.21593	1.21414	1.29693	1.31708	1.45308	1.32896	1.68793	1.42922	1.45674	1.64464	1.50943	1.66799	1.27775	1.35957	1.56878	1.49353	1.54968	1.4048	1.09673	1.37736	0.91338	0.89116	1.14178	1.57947	0.84741	0.71615	1.09594	0.83265	1.13749	1.20193	0.95197	1.55132	0.88207	0.94265	1.38788	1.3343	0.9053	0.70976	1.26179	1.6411	1.45638	1.10564	1.30132	0.80356	1.24997	1.50989	1.12009	1.11677	1.27053
YDR379C-A	-1.49819	-2.89429	-1.28481	-1.81989	-1.88548	-1.95122	-1.54862	-2.08764	-2.25475	-2.63481	-2.59937	-2.84145	-2.09538	-2.3618	-2.1618	-2.25648	-2.51484	-2.59328	-1.87404	-1.71482	-0.76805	-0.81763	-1.6001	-2.32549	-1.80142	-1.03221	-0.47708	-0.45439	-2.64415	-2.60458	-2.27965	-2.56111	-3.22795	-1.11898	-1.83978	-2.34992	-0.86581	-1.51938	-1.90676	-1.88396	-1.57203	-1.9286	-1.53281	-2.69308	-1.66257	-2.05412	-2.67278	-1.10892	-1.0914
YNR074C	-0.21068	-0.18169	-0.17087	-0.1234	-0.34331	-0.11819	0.4001	0.17678	0.43684	0.3147	0.30801	0.40526	0.09093	-0.03431	-0.02723	0.05736	0.02851	0.05818	-0.28705	-0.42139	-0.22022	-0.38217	-0.30601	-0.48047	-0.69793	-0.76958	-0.29727	-0.96704	-0.18457	-0.30993	0.83038	-0.09941	-0.09058	-0.3604	-0.00642	-0.46691	-1.07022	-1.21618	-0.76816	-1.54542	-0.73164	-0.46029	0.12912	0.10899	-0.5363	-0.05042	-0.12245	-0.11102	-0.11492
YDR113C	-0.49818	-0.25317	-0.36697	-0.47898	-0.49429	-0.48071	-0.43922	-0.10391	-0.43102	-0.77536	-0.41739	-0.32698	-0.57581	-0.83698	-0.5925	-0.62133	-0.54236	-0.51197	-1.04564	-0.59752	-0.66375	-0.00076	-0.92849	-0.43063	0.09661	-0.28055	-0.19268	-0.69048	-0.16823	-0.2965	-1.28211	-0.70714	-0.23442	-0.31762	-0.58847	-0.48169	-0.35517	0.03128	-0.30823	-0.16154	-0.23263	-0.18637	-0.45303	-0.26726	-0.36854	-0.15341	-0.10323	-0.56464	-0.29812
YLR189C	-0.63668	-0.56102	-0.74336	-0.67372	-0.68487	-0.70431	-0.76764	-0.66337	-0.62792	-0.70379	-0.67187	-0.74227	-0.98694	-1.12425	-0.93007	-0.70913	-1.01054	-0.8589	-0.8127	-0.80741	-0.71908	-0.47966	-0.84456	-0.72744	-0.30744	-0.60388	-0.80812	-0.76133	-1.03696	-1.06591	-1.10732	-0.96991	-0.35359	-0.95926	-0.95083	-1.01962	-0.71915	-0.3423	-0.62465	-0.45491	-0.64106	-0.69302	-0.73427	-0.98914	-0.62707	-0.90184	-0.60323	-0.58447	-0.68307
YOL159C	-1.01042	-0.90653	-1.36451	-1.15172	-1.06591	-1.09206	-1.41465	-0.99523	-1.04331	-0.99314	-1.05094	-1.26113	-2.60452	-3.04147	-3.27819	-2.85689	-2.88635	-3.4923	-0.49173	-0.46415	-1.43443	-1.09628	-2.04871	-2.33427	-2.28587	-2.66321	-3.08554	-2.51184	-1.93627	-1.95769	-0.41197	-0.99566	-1.0182	-0.47727	-0.84918	-0.77759	-1.00805	-0.61325	-2.90399	-3.08112	-0.77266	-0.75632	-1.1832	-1.16172	-0.98742	-2.20126	-1.46447	-0.84825	-1.09539
YDL247W	-2.71827	-2.65213	-2.72365	-2.55187	-2.53111	-2.95735	-3.29576	-3.30707	-3.31235	-3.3467	-3.35947	-3.35384	-3.98159	-4.01084	-3.91842	-4.13034	-3.73464	-4.10195	-2.91927	-3.25404	-3.18244	-3.38308	-3.08208	-3.50426	-3.19481	-3.57992	-2.75561	-2.90962	-2.93287	-2.56338	-3.27419	-4.01039	-4.01272	-3.78992	-3.42052	-3.4854	-2.68329	-2.84069	-3.14492	-3.54423	-2.57296	-2.44751	-2.88883	-3.38805	-2.69906	-2.66155	-3.33127	-2.96212	-2.98927
YML032C	0.82276	0.94134	0.96914	0.78614	0.81855	0.96231	0.65712	0.72381	0.84944	0.73201	0.83411	0.88439	0.56294	0.38688	0.51815	0.94635	0.59772	0.81673	0.65664	0.91224	0.40609	0.76078	0.50419	0.46043	0.54568	0.60117	0.70834	0.57956	0.85283	0.61916	0.63522	0.98421	0.90626	1.2964	0.80644	0.94926	0.39246	0.58215	0.49006	0.31695	0.69844	0.88469	0.70331	0.96191	0.44469	0.65585	0.79407	0.81643	0.97987
YFL028C	0.40189	0.73252	0.39693	0.32046	0.49564	0.50191	1.05269	0.9557	0.79989	1.19182	0.92839	0.79456	-0.11751	0.12033	0.26861	-0.01085	0.16628	0.62982	-0.29957	-0.03793	0.05096	-0.09566	0.27705	0.59132	0.82045	0.35379	0.40801	0.13546	0.71232	0.68004	1.08071	0.62122	0.72085	-0.04332	0.48943	0.5439	-0.48846	-0.02936	0.62784	0.73614	0.65448	0.16623	0.35766	-0.60416	0.71019	0.98406	0.33577	0.54473	0.86365
YBR256C	0.89124	0.82281	1.09985	1.03469	1.10404	1.11712	1.16561	1.60778	1.38076	1.56137	1.19993	1.29567	0.35166	0.36362	0.43292	0.40913	0.64872	0.45335	0.66767	0.93054	0.47991	0.69097	0.83777	0.71805	1.18627	1.14224	0.5233	0.72112	0.81024	0.86631	1.42325	0.6942	0.34411	1.61603	0.58941	0.88807	0.89846	0.96695	0.97205	1.12783	1.28027	1.20743	0.75241	0.4949	1.06115	1.04582	1.07991	1.36258	0.8325
YOR081C	0.59796	0.65028	0.44607	0.49382	0.1094	0.54765	0.16137	0.08934	0.09939	0.25335	0.19164	0.27156	0.50852	0.24324	0.28374	0.44005	0.39427	0.27152	0.80227	0.69524	0.74642	0.83456	0.78165	0.57835	0.78163	1.10984	0.25842	0.67174	0.52731	0.65695	1.03418	0.51521	0.96343	1.1407	0.50291	0.41977	0.70739	0.87181	0.973	0.98337	0.20743	0.32	0.16411	0.12077	0.44251	0.14076	0.13875	0.01485	-0.04569
YPL024W	-0.85556	-0.56057	-0.83283	-1.10637	-0.80952	-0.88278	-0.5806	-0.33343	-0.55886	-0.60931	-0.58392	-0.53779	-0.29284	-0.13203	-0.54344	-0.20978	-0.13682	-0.26097	-1.04379	-0.90307	-1.66657	-1.34824	-1.24913	-1.05099	-1.19131	-1.54154	-1.18942	-0.8261	-1.98392	-0.91094	-0.46099	0.09107	-1.19468	-0.3768	-1.69823	-1.57825	-1.65438	-1.38878	-0.96287	-0.67145	-0.58994	-0.72899	-1.53533	-1.04382	-1.09128	-0.95605	-0.85656	-0.64313	-1.21263
YLR442C	-0.52067	-0.85379	-0.47356	-0.67836	-0.3195	-0.73213	-0.44763	-0.57171	-0.73824	-0.66794	-0.61605	-0.67723	-0.92433	-0.98119	-0.93021	-0.98607	-0.65987	-0.87463	-1.13868	-0.70522	-1.31516	-1.05781	-1.04538	-0.78029	-0.56999	-0.81356	-0.64599	-0.6149	-0.78633	-0.96901	-1.4632	-0.78384	-1.14702	-1.7965	-0.62169	-0.60984	-0.72944	-0.76992	-0.91518	-0.73868	-0.46427	-0.54473	-0.47095	-0.85291	-0.4939	-0.61421	-0.77362	-0.6567	-0.73453
YMR257C	-0.75687	-0.66934	-0.88815	-0.91673	-1.07324	-0.97375	-0.59165	-0.84327	-0.49861	-0.29264	-0.3166	-0.60265	-0.46525	-0.6105	-0.63503	-0.67058	-0.48309	-0.50566	-0.76132	-0.88811	-0.67158	-1.00756	-0.47041	-0.92971	-1.02584	-1.42197	-0.84258	-0.63476	-1.25336	-1.03614	-0.26704	-0.2938	-0.861	-0.92631	-0.51989	-0.73726	-0.99639	-1.23304	-0.82989	-0.9052	-0.87699	-0.88445	-1.07983	-0.98634	-0.86401	-0.93284	-0.87175	-0.89879	-0.99585
YDL219W	0.55791	0.19914	0.66043	0.63663	0.82148	0.60795	1.20017	0.8351	1.02768	0.45345	0.92732	0.8357	0.37935	0.37234	0.39359	-0.04377	0.46324	0.01965	0.60231	0.50942	0.56832	0.6773	0.03735	0.75651	0.62423	0.5688	0.73773	0.43614	0.53816	0.32837	0.39824	-0.83135	0.20241	-2.96514	0.57676	0.57867	0.49375	0.24822	0.46525	1.13826	0.64966	0.99299	0.49291	-0.2605	0.77097	0.68238	0.48405	0.50023	1.12283
YKR040C	-3.8072	-4.02928	-3.46006	-3.6829	-3.63622	-3.98311	-3.92217	-3.28626	-3.77702	-3.80787	-3.7881	-3.96065	-3.40307	-3.80943	-4.09985	-4.45722	-3.60608	-4.11428	-3.66167	-3.74218	-3.49498	-3.42355	-2.97525	-3.55313	-3.88196	-3.31768	-3.44798	-3.20845	-4.11353	-4.01446	-2.82721	-3.69758	-4.36592	-4.55058	-2.66644	-3.17906	-4.49972	-3.40162	-3.7775	-4.30763	-3.67144	-3.83162	-3.98706	-3.21479	-3.47267	-3.95749	-3.81064	-3.76658	-3.34831
YKL122C	1.76951	1.39417	1.97328	1.65907	1.79282	1.47138	0.94341	2.05513	1.41567	1.29244	1.50868	1.62644	1.62635	1.57913	1.73411	0.66369	1.62787	2.22964	1.76147	2.15176	1.53141	1.9174	0.91697	2.11242	1.6504	1.48704	2.12365	1.15869	1.48648	1.42045	0.11627	1.12874	1.61265	1.38745	1.22295	1.92017	1.38719	2.13044	1.07954	1.81086	1.80526	1.67527	1.65112	1.46394	1.85062	1.66999	1.76252	1.75989	1.9146
YGL240W	-1.37647	-0.82583	-1.18603	-1.1213	-1.10609	-1.56272	-1.27388	-1.47247	-1.37053	-1.06447	-1.11211	-0.94133	-1.05448	-1.15998	-0.98799	-1.02816	-1.01631	-0.96239	-1.2203	-1.22943	-1.18274	-1.21198	-0.91512	-1.61132	-1.441	-1.40868	-1.36872	-1.28443	-1.37496	-1.19078	-0.67745	-0.84929	-0.56941	-0.62016	-1.20462	-1.41735	-1.21827	-1.23456	-1.14737	-1.64261	-1.0672	-1.02805	-1.32019	-0.61673	-1.54935	-1.35743	-1.4024	-1.31279	-1.32441
YDL080C	-0.46935	0.11638	-0.17539	-0.52814	-0.5302	-0.25011	-0.46462	-0.68237	-0.41981	-0.43398	-0.24394	-0.65077	-0.48897	-0.47969	-0.39073	-0.35306	-0.49384	-0.47793	-0.64585	-0.79556	-0.57914	-0.91581	-0.59876	-0.36278	-0.48223	-0.77854	-0.67668	-0.42563	-0.4248	-0.1266	-0.35933	-0.58983	0.04315	-0.43778	-0.47227	-0.11231	-0.778	-0.46995	-0.47292	-0.33898	-0.83052	-0.66049	-0.38575	-0.38161	-0.57899	-0.13959	-0.34654	-0.60289	-0.05423
YEL001C	2.54999	2.04185	2.08179	2.29805	2.27547	2.46966	2.15042	2.41636	2.29347	2.16696	2.08091	1.77395	3.06529	3.33058	2.87429	2.86978	2.96637	2.57804	2.67182	2.74204	2.57259	2.63348	2.39423	2.41184	2.41603	2.71421	1.93673	2.38133	2.18868	2.14558	2.92632	1.85838	2.20779	1.66461	1.75255	2.08248	2.27431	2.65885	2.1958	2.6181	2.49863	2.19364	2.42342	2.03637	2.56316	2.08463	2.40045	2.64604	2.29807
YPR168W	-0.80351	-1.30094	-0.65518	-0.78186	-0.53465	-1.28252	-0.90567	-0.3635	-0.74277	-1.05295	-0.73039	-0.7494	-1.23195	-1.22782	-0.90289	-0.72455	-1.02765	-0.87412	-1.23646	-0.8842	-1.13184	-1.03119	-1.27714	-1.37346	-1.02781	-1.27444	-0.84909	-1.38011	-1.0024	-0.83982	-0.84218	-1.4242	-0.92608	-2.11475	-0.64571	-1.10144	-1.23296	-1.16823	-1.01832	-0.76807	-0.71812	-0.7587	-0.90077	-1.07783	-0.63957	-1.1386	-0.58038	-0.77471	-0.84772
YLR374C	-3.35522	-2.8734	-3.26579	-3.03894	-2.875	-3.22406	-2.99194	-2.3945	-2.82811	-2.2759	-2.70679	-2.16161	-2.70452	-2.28994	-2.79959	-2.70288	-2.89118	-2.86296	-2.48408	-2.52954	-2.49233	-2.51148	-2.70123	-2.54032	-2.84818	-3.17103	-2.97392	-3.10401	-2.85892	-2.47048	-3.34136	-2.99613	-3.11381	-1.75176	-2.51112	-2.95917	-2.99499	-2.60317	-2.99098	-2.48841	-2.60353	-2.53822	-2.78373	-1.88202	-2.67862	-2.73172	-2.97267	-3.18917	-3.23673
YDL034W	-4.43753	-4.30136	-4.05235	-4.05563	-4.88779	-4.12168	-4.90048	-4.66563	-5.03634	-4.32386	-4.50842	-3.84662	-4.65787	-3.02918	-3.77972	-4.87076	-4.19177	-4.19099	-4.19316	-4.52454	-3.99181	-4.2626	-4.5812	-4.00453	-4.32577	-4.17441	-3.98236	-4.52437	-3.8292	-3.8213	-3.6763	-4.53531	-4.55619	-3.6071	-3.94096	-3.6908	-4.61145	-4.84913	-4.42683	-4.2052	-4.92905	-4.10409	-4.4061	-3.71663	-4.96717	-4.39177	-4.48634	-4.59373	-4.45072
YHR109W	-1.20195	-1.29113	-1.20293	-1.23315	-1.16061	-1.46374	-0.82665	-1.28205	-0.71272	-1.01414	-1.01682	-0.94133	-0.61305	-0.5198	-0.4046	-0.42826	-0.74843	-1.10194	-1.09902	-1.52713	-1.03139	-1.61119	-0.99591	-1.39349	-1.55376	-2.07072	-0.88768	-1.27991	-1.67551	-1.38913	-0.80082	-0.84702	-1.19468	-1.73213	-1.03867	-1.22007	-1.35401	-1.90513	-1.45202	-1.63193	-1.49337	-1.46507	-1.48771	-1.93306	-1.236	-1.29592	-1.4945	-1.38717	-1.16418
YPL061W	4.90533	4.86293	5.4408	4.59259	4.69633	4.69793	5.46546	5.07654	5.74808	5.27305	5.78736	5.15493	5.32282	5.28132	5.42979	5.31313	5.61901	5.48639	5.21261	4.64425	5.85554	4.92571	5.17091	4.87189	4.73836	4.56868	5.76111	5.69053	5.73287	4.84344	5.67866	5.43048	5.47966	5.7557	5.18205	4.91707	5.55372	5.1699	5.1203	4.72064	5.48269	5.83491	4.90209	5.73706	6.07605	5.07652	5.99849	5.46056	5.9126
YJL060W	0.86504	0.83796	0.68147	0.88581	0.82447	0.97881	0.88805	0.7132	0.74702	0.86986	0.75014	0.64283	0.78626	0.74939	0.59559	1.03537	0.51872	0.47518	1.73311	1.42485	1.57739	1.78367	1.28427	0.62401	1.24058	1.47182	1.83895	2.5218	1.05545	0.69978	2.60645	1.83449	1.14471	1.0534	1.34491	1.29814	1.21928	1.28876	0.80314	0.47836	1.50592	0.97122	0.75224	0.92843	1.59704	0.61033	1.33788	1.52401	0.99125
YLR240W	-0.42304	-0.25486	-0.53045	-0.49034	-0.51084	-0.38275	-0.40756	-0.39359	-0.40962	-0.27082	-0.24639	-0.36537	-0.511	-0.47969	-0.54273	-0.42333	-0.48097	-0.66049	-0.44384	-0.49839	-0.42418	-0.57991	-0.48687	-0.58749	-0.63791	-0.43026	-0.43466	-0.32267	-0.43459	-0.30251	-0.39155	-0.39098	-0.46856	-0.4834	-0.13315	-0.44961	-0.5985	-0.54941	-0.59535	-0.48951	-0.60464	-0.46558	-0.52994	-0.39845	-0.42083	-0.51216	-0.5425	-0.5172	-0.59403
YDR223W	-3.78959	-3.95446	-3.3756	-3.76959	-3.48101	-4.11378	-3.81455	-3.61845	-3.72268	-4.2264	-3.62187	-3.85362	-3.42428	-3.65025	-3.33559	-3.79839	-3.35187	-3.58098	-3.7926	-3.78582	-3.48605	-3.62785	-3.80475	-3.4296	-3.39797	-3.58819	-2.80347	-3.68337	-3.95089	-3.31666	-3.41793	-3.88995	-2.42958	-2.662	-3.61248	-4.27712	-3.06295	-3.3545	-3.65321	-3.64906	-3.43163	-3.70961	-3.44486	-3.76009	-3.40573	-3.50577	-3.72147	-3.62597	-3.43659
YPR062W	2.8686	3.21178	2.9798	2.85806	3.1716	3.24117	2.9737	3.39943	3.27252	3.28475	3.05837	3.38307	3.424	3.4966	3.48903	2.72724	3.39914	3.55311	3.14894	3.1977	2.95338	3.04578	2.62346	3.31948	2.99188	2.90031	3.26437	2.63945	3.15563	2.54082	2.85284	3.44325	2.69946	2.27407	2.72367	3.45636	2.9476	3.09351	2.6824	3.46135	3.82064	3.51181	2.9064	2.54965	3.22252	3.15861	3.49325	3.49776	3.29245
YER174C	1.07973	1.09964	1.29098	1.26134	1.40126	1.21271	1.82217	1.24923	1.44766	1.46449	1.78489	1.81038	2.00546	1.79683	1.72669	1.52117	1.99041	1.95329	0.99704	0.57509	1.58989	1.23463	1.30091	1.18872	0.35141	0.02803	1.12733	1.29323	1.24799	1.50773	1.57571	1.26647	1.28305	0.72697	1.30015	1.10747	0.77657	0.38268	1.19097	0.79505	1.15944	1.51219	0.60415	0.96724	1.58429	1.45629	1.51749	1.66766	1.32252
YGR104C	-0.36108	-0.84998	-0.28649	-0.36118	-0.45207	-0.53885	-0.25842	-0.34042	-0.33097	-0.41132	-0.24951	-0.61625	0.35754	0.30379	0.3499	-0.08605	-0.02155	0.31971	-0.74763	-0.29686	-0.22691	-0.36599	-0.65569	-0.4337	-0.38838	-0.71215	-0.235	-0.56867	-0.35477	-0.49153	-0.89916	-0.26268	-0.44307	-0.13866	-0.60226	-0.82016	-0.08665	-0.62325	-0.30557	-0.61314	-0.55424	-0.37974	-0.38194	-0.8349	-0.45496	-0.44484	-0.68552	-0.41813	-0.00451
YDR402C	-3.98256	-4.33916	-3.80313	-4.02889	-4.03593	-4.13717	-4.06634	-4.11147	-4.1404	-4.5134	-4.32153	-4.57411	-3.51255	-3.44849	-3.78013	-3.8911	-3.62657	-3.65819	-3.95701	-3.72271	-4.50787	-4.18784	-3.7622	-3.91436	-3.95807	-4.1497	-4.11433	-4.35319	-3.9233	-3.70824	-3.73995	-4.56769	-4.34281	-3.9177	-3.75135	-4.10296	-4.50555	-4.20469	-4.06921	-4.18032	-4.11599	-4.09384	-4.13021	-4.12938	-4.26227	-3.88439	-4.23863	-4.0189	-3.85292
YLR037C	-1.38478	-1.58397	-1.23135	-1.71061	-1.49141	-1.62564	-1.35715	-1.65747	-1.5442	-2.11996	-1.40041	-1.64798	-1.31853	-1.1163	-1.30394	-1.00392	-1.25471	-0.20372	-1.51766	-1.444	-1.53992	-1.70229	-1.04232	-1.41433	-1.47215	-1.32314	-1.67997	-1.73825	-1.54314	-1.24202	-1.48922	-0.89314	-1.64014	-0.26148	-1.75587	-1.23528	-1.60302	-1.54348	-1.52817	-1.78188	-1.79062	-1.72688	-1.44251	-0.98445	-1.50199	-1.1994	-1.70489	-1.61065	-1.59802
YMR146C	3.28452	3.38397	3.45095	3.40757	3.34868	3.37867	4.04535	4.20081	4.1233	3.92847	4.12144	4.05292	3.89587	4.03816	3.93714	3.86909	4.15399	3.8813	3.36153	3.37202	3.67198	3.4107	3.3506	3.57817	3.57695	3.28429	4.00014	3.24174	3.80282	3.88152	2.99139	4.00879	3.49555	3.51327	3.8625	3.89241	3.42266	3.57976	3.55586	3.72224	3.79417	3.79581	3.6945	3.49874	3.94641	4.1877	4.30289	3.69522	4.29401
YGR241C	0.80412	1.04706	0.91005	0.91485	0.62636	0.92721	1.27807	1.28008	1.3584	1.15714	1.44082	1.2472	1.49713	1.35627	1.30497	1.43606	1.42734	1.25813	1.00736	0.94995	1.02812	1.01172	1.10883	1.18012	0.85121	0.95417	1.05622	1.03357	1.14847	1.06952	0.71508	1.11009	1.12083	1.02905	1.24122	1.29443	0.97592	0.96248	1.35477	1.20496	0.79467	1.04939	1.16538	1.40036	1.18571	1.02865	0.96326	0.81856	1.26754
YGL062W	1.77771	1.90405	1.77267	1.72766	1.75077	2.3843	1.99005	2.23308	2.05291	2.4839	1.90292	2.11328	1.81017	2.05128	1.82752	1.56267	1.73999	1.73578	2.08589	1.90312	1.92588	2.29345	2.9636	1.59691	1.62377	1.92974	2.57998	2.67791	2.02918	1.57175	2.67369	2.17001	2.07061	2.35634	1.83614	2.03164	2.1751	1.86585	2.63059	2.37338	3.45443	2.03701	1.55988	2.46581	2.61626	1.72634	2.33406	3.24573	2.2418
YPR057W	-0.51553	-0.19337	-0.55929	-0.4104	-0.33645	-0.51775	-0.42571	-0.51037	-0.47966	-0.16817	-0.58487	-0.07485	-0.78338	-0.74222	-0.86537	-0.52371	-0.43149	-0.26708	-0.48286	-0.66916	-0.72487	-0.15411	-0.55216	-0.66979	-0.1539	-0.25084	-0.651	-0.92274	-0.21958	-0.5302	-0.80816	0.058	-0.22361	0.39253	-0.8289	-0.70576	0.01173	-0.22665	-0.42377	-0.54839	-0.39775	-0.23414	-0.20887	-0.21663	-0.53218	-0.45161	-0.28087	-0.47194	-0.63689
YIL012W	-3.26053	-2.97827	-3.01132	-3.25784	-3.12548	-3.54844	-3.27075	-3.51987	-3.58264	-3.80069	-3.16477	-3.55579	-3.97639	-3.6029	-3.81349	-5.01165	-3.74416	-3.39901	-3.79677	-3.25295	-3.52931	-3.24756	-3.0782	-3.276	-3.37254	-3.04485	-3.90443	-3.36266	-3.87719	-3.23228	-3.13803	-3.74819	-4.38971	-3.17301	-3.65863	-3.61688	-3.22548	-2.98034	-3.14523	-3.46664	-3.10788	-2.71348	-3.23545	-3.97299	-3.32758	-3.00313	-3.64907	-3.02403	-3.3629
YDR156W	3.02148	3.04225	2.98129	3.11603	2.63188	2.78594	3.30504	3.76847	3.46846	3.69595	3.45063	3.86957	3.90463	3.9013	3.79709	3.9247	3.72841	3.95092	3.22729	3.3781	3.44875	3.63474	3.53164	3.36078	2.99313	3.58011	3.16406	3.4567	3.17545	3.19089	4.47363	3.75287	3.40909	3.83433	3.29623	3.17554	3.1507	3.43084	3.48652	3.6031	3.50629	3.36312	3.34874	3.5304	3.159	3.47668	3.08151	3.15689	3.38598
YJR113C	0.55762	0.49913	0.41333	0.46134	0.34106	0.34763	0.87376	1.05706	1.01781	1.04862	0.78188	1.16148	0.91415	1.13902	0.79354	1.11944	0.93241	0.78349	0.89129	0.30309	1.02893	1.12283	1.42766	0.54815	0.06641	0.33308	1.3471	1.59941	0.0002	0.7425	1.53856	0.94537	0.71667	0.41788	0.64762	0.34288	0.46401	0.55517	0.74577	0.19373	0.74989	1.01552	0.50443	1.09602	0.47498	0.38657	0.7022	0.50152	1.19984
YPR131C	-0.37929	-0.12918	0.03011	-0.09444	-0.35059	-0.16242	-0.42576	-0.10784	-0.01518	-0.24948	-0.37077	-0.09678	0.17538	0.1611	0.2504	0.3331	0.51159	0.26559	-0.15521	-0.33149	0.07637	-0.12137	-0.31588	-0.175	-0.2273	-0.46954	0.15315	-0.49412	0.17368	-0.60786	-0.5021	-0.73189	-0.10761	-0.66493	-0.13881	-0.24289	-0.17187	-0.0345	-0.16584	-0.05909	-0.58183	-0.56757	-0.52641	0.13506	-0.17233	-0.4435	-0.21798	-0.52053	0.36668
YLR416C	-4.02551	-3.88456	-4.01168	-3.8694	-4.0407	-4.02705	-3.51091	-3.79208	-4.65524	-4.36615	-4.56598	-4.13305	-3.81236	-4.24293	-4.00729	-3.86151	-4.15054	-3.89792	-3.36167	-3.25141	-3.27596	-3.24226	-3.89484	-3.78366	-3.46425	-3.26075	-3.9287	-3.96536	-4.02969	-3.36395	-3.87521	-2.64383	-4.41188	-3.76749	-3.20494	-4.14812	-2.96838	-3.27305	-3.80189	-4.49899	-4.13494	-3.76953	-3.87557	-3.30374	-3.07089	-4.31013	-4.38207	-4.08011	-3.77175
YLR029C	6.39176	5.64808	6.60232	5.79328	6.57976	6.06132	6.15446	5.72154	6.2929	5.94665	6.34038	5.93727	6.22701	5.85323	6.22016	5.82707	5.96667	5.96958	5.93782	5.59488	6.28983	5.3323	5.6161	5.5821	5.44958	5.30146	6.23435	6.12248	5.9813	5.90109	6.05513	5.51172	5.54539	4.89082	6.40411	6.11635	5.5794	5.57154	5.89501	5.51675	6.40057	6.30896	5.88826	5.64953	6.60247	6.26293	6.46063	6.24124	6.68279
YMR155W	-0.87586	-0.78281	-1.14294	-1.03448	-0.97296	-0.95783	-1.00027	-1.06175	-1.09921	-1.07099	-1.0451	-1.23134	-0.31353	-0.34449	-0.57765	-0.28333	-0.29615	-0.59093	-0.83842	-1.06404	-0.51855	-0.42158	-0.6784	-1.41137	-0.52231	-0.46289	-0.79539	-0.10167	-1.40408	-0.91854	0.40512	-1.03944	-1.26449	-0.75062	-1.16779	-1.37902	-0.88786	-0.88981	-0.74857	-1.11222	-0.73625	-0.78576	-0.82356	-0.84685	-1.12585	-1.13765	-1.18553	-1.05451	-1.37161
YNL180C	1.38088	0.7332	1.51638	1.10815	1.55868	1.01919	1.29783	1.65837	0.88634	0.87608	1.18038	1.35895	1.38451	1.4488	1.29363	0.71028	1.04518	1.49528	1.01175	1.44674	1.13938	1.30652	0.94426	1.7652	2.27862	1.9972	1.74216	1.10093	1.53308	1.50829	0.1892	0.38414	1.11336	0.5305	1.41644	1.60667	2.52096	2.66171	1.19446	1.70916	2.86414	2.07826	1.68995	0.66286	2.20165	1.24592	1.35396	1.62382	1.25026
YIL080W	-0.53064	-1.1091	-0.66278	-0.52765	-0.33185	-0.68654	-1.46192	-1.35353	-1.43924	-1.63049	-1.49394	-1.74943	1.71334	1.96938	1.52687	1.15765	1.71217	1.60525	2.59174	3.01741	1.30491	0.71074	-1.56826	-0.7219	-0.6877	-1.54334	-4.72861	-5.21446	1.54825	0.28771	-2.39034	-1.05819	-0.8768	-0.78291	-0.54169	-0.26085	-0.8071	-0.62627	1.51915	1.80972	-0.75881	-1.00082	-0.69097	-0.70093	-0.12334	-0.56614	-1.55155	-0.97336	-1.06609
YGR164W	-4.19521	-3.46185	-4.41266	-4.03265	-4.54191	-5.08742	-4.64226	-4.3726	-4.41271	-4.6259	-5.20367	-4.11292	-4.75761	-4.63061	-4.09553	-4.87076	-4.37711	-3.69514	-3.87246	-3.79246	-4.16452	-4.03961	-3.43152	-3.71427	-4.13363	-4.12462	-4.52068	-1.5471	-5.94434	-4.57596	-3.25189	-4.8359	-3.50903	-3.99104	-4.26167	-4.01183	-4.32334	-3.89532	-4.12821	-3.83163	-3.74457	-4.46406	-3.47113	-3.68019	-3.31198	-4.48676	-3.95743	-4.67039	-3.00548
YOL106W	-1.89209	-2.91847	-2.47316	-2.06047	-1.89779	-0.78523	-2.07164	-2.74478	-2.35798	-3.40256	-2.51296	-3.24121	-1.08238	-1.74704	-1.3616	-1.51442	-1.07709	-1.61246	-5.01191	-2.55349	-3.94134	-3.10512	-3.1413	-3.64118	-3.19851	-2.7323	-2.81095	-1.94284	-3.55105	-2.30712	-2.21428	-4.70969	-3.99511	-4.40078	-3.73649	-2.54309	-4.63737	-4.10351	-3.76946	-3.27977	-2.21483	-2.22473	-3.23545	-3.50471	-2.02003	-2.12336	-3.29024	-1.02191	-3.04867
YIL140W	0.27847	0.11284	-0.19483	0.12658	0.08173	0.18443	0.18543	-0.11282	0.15531	0.20973	0.06204	0.05103	0.60598	0.40014	0.32168	0.48872	0.23089	0.21981	1.09465	1.0244	1.46123	1.37244	1.31128	1.0553	1.40688	1.6301	0.11504	0.57169	1.17037	0.32206	1.00064	-0.07406	0.62804	0.53607	0.40403	0.47899	1.34524	1.12489	1.43306	1.25769	0.3721	0.38904	-0.02204	-0.02748	-0.10275	0.18131	0.04067	0.1043	0.06596
YIL171W-A	-4.41152	-4.8502	-4.60429	-4.79765	-4.62994	-4.48545	-5.00321	-3.97291	-4.84178	-4.43661	-4.5371	-4.24979	-4.3016	-4.1008	-4.22347	-4.50797	-4.1341	-4.16705	-4.38872	-3.63101	-4.89071	-3.89485	-4.78124	-3.79669	-4.77161	-3.77216	-4.59707	-4.69567	-4.59566	-5.15796	-4.32384	-4.35605	-4.85437	-4.54896	-4.17554	-3.53917	-4.73168	-3.78781	-4.67221	-3.59196	-4.18898	-4.03493	-4.7846	-4.42767	-4.24261	-4.33032	-4.54353	-4.18733	-4.94749
YDR272W	0.59504	0.58103	0.65999	0.59034	0.60585	0.52221	-0.4846	-0.74514	-0.84411	-0.80891	-0.71103	-0.70138	-0.6595	-0.85342	-0.61117	-0.17608	-0.51961	0.14722	-0.37224	-0.42966	-0.05932	0.48145	-0.89208	-0.16449	0.06816	-0.24879	0.03861	-0.4487	0.72847	-0.43418	-1.98541	-0.5665	0.88988	0.87723	-0.83015	-0.5267	-0.17879	-0.01158	-0.17086	0.28939	-0.11475	-0.25283	-0.74156	0.18611	0.19933	-0.39167	0.97347	0.64728	-0.05656
YDR114C	-5.0512	-4.86851	-4.20494	-4.86406	-4.92271	-5.08742	-4.67523	-4.89665	-4.66926	-5.01283	-5.77345	-4.33765	-5.86101	-4.81483	-4.73418	-4.31767	-4.27064	-5.07217	-4.79582	-4.73966	-4.66926	-4.76701	-4.15115	-4.91167	-4.48083	-5.09628	-5.15624	-3.84494	-4.94032	-5.1782	-3.76285	-5.12674	-5.58434	-4.75865	-5.18742	-4.645	-5.61887	-4.53448	-5.10236	-5.40471	-4.82659	-4.33012	-3.88292	-5.18557	-4.03689	-5.07872	-4.17416	-5.08331	-4.29546
YOR238W	-0.39081	-0.44813	-0.57777	-0.59107	-0.34623	-0.33935	-0.43498	-0.63138	-0.53906	-0.59245	-0.46313	-0.50608	-0.50054	-0.48105	-0.29962	-0.66694	-0.48621	-0.33225	-0.60752	-0.46839	-0.30263	-0.66492	-0.8005	-0.23962	-0.33394	-0.74321	-0.50796	-1.07655	-0.55074	-0.60781	-1.09274	-0.48761	-0.16772	-1.08428	-0.47788	-0.50821	-0.11419	-0.68053	-0.43778	-0.38878	-0.74418	-0.74203	-0.16374	-0.59752	-0.31752	-0.20183	-0.58338	-0.543	-0.18627
YKL142W	0.84898	0.91643	0.59998	0.80772	0.60967	1.016	-0.2403	0.63488	0.32344	0.23536	-0.0485	-0.05509	0.75098	1.02337	0.66281	1.07129	0.96251	1.19481	0.26383	0.41884	0.5517	1.08048	0.01582	0.32586	1.5054	1.00883	1.33788	1.06165	0.43612	0.48062	-0.43553	0.334	0.61121	0.97968	-0.01883	0.1863	1.01522	1.47436	0.5268	0.56836	1.19563	1.00691	0.7084	1.21021	1.09797	0.93403	1.61303	1.49234	1.05314
YLR139C	0.4968	0.62817	0.37382	0.46163	0.13359	0.55653	0.8937	1.46158	1.07174	1.11449	1.21155	1.18757	1.2796	1.64802	1.36721	1.29342	1.61063	1.34279	0.78457	0.73626	0.65508	0.81205	1.2528	1.24993	0.4501	0.74406	0.91754	1.19992	0.61354	0.82024	1.57107	1.04379	0.66359	0.96878	0.78706	0.72977	0.83796	0.88491	0.91972	0.82651	0.78855	0.75601	0.7969	0.83729	0.76517	0.68701	0.68534	0.72843	0.60102
YNR044W	0.2602	0.24278	0.01203	0.07974	-0.20811	-0.10871	-0.30352	-0.35328	-0.29634	-0.30303	-0.16678	-0.11517	-0.18266	-0.49125	-0.73601	-0.81626	-0.52809	-0.72731	4.37173	4.25328	3.49265	3.98726	1.64511	1.2976	1.03603	1.17689	-0.26834	0.50457	3.39779	0.98605	1.09385	-0.11529	2.54078	1.59065	0.08251	0.06759	0.9253	1.07926	3.07613	2.91219	0.18264	-0.30422	0.74362	0.75639	-0.05699	0.19275	-0.13678	-0.11875	-0.55787
YPR009W	0.04346	0.35771	0.32743	0.14656	-0.15256	0.23991	0.75902	0.60036	0.57138	0.4787	0.44525	0.63071	-0.28855	-0.18567	0.04183	-0.21376	-0.1443	-0.29677	0.64346	0.28326	0.32141	0.32859	0.16384	0.49438	0.36784	0.51494	-0.40927	-0.15383	0.2319	-0.07967	0.3843	0.64774	0.27165	0.37694	0.91096	0.66172	0.21463	0.15188	0.86295	1.06149	-0.17131	0.0781	0.25522	-0.21019	0.13502	0.36814	0.0037	-0.02061	-0.10866
YHR032W	1.25042	1.03123	0.65214	0.9253	0.97103	1.03925	1.88639	1.46759	1.60859	2.16873	2.08595	1.98953	2.49133	2.26058	2.05309	2.29503	2.09412	2.2123	1.40396	1.30851	1.38937	1.44882	1.84523	1.61802	1.11417	1.11013	1.56073	1.7775	1.0503	1.18014	2.24335	1.93889	1.82797	2.22941	1.13914	1.28427	1.48908	1.25971	1.36959	1.71145	1.74611	1.51134	1.31012	1.60975	1.43618	1.64943	1.85465	1.78773	0.83191
YDR429C	3.1859	2.98239	3.31116	3.22974	3.27487	3.16269	3.73967	3.7523	3.54945	3.41089	3.61768	3.51281	3.16605	3.48893	3.41672	3.07434	3.44472	3.5159	3.13646	3.18708	2.96216	3.07621	2.70522	3.40182	2.907	2.87026	3.38275	2.98936	3.17355	3.21549	2.27318	2.9618	2.70379	2.20733	3.23018	3.35465	3.04127	3.33553	2.80257	3.16199	3.42268	3.29456	3.17099	2.53314	3.59368	3.40492	3.5553	3.39136	3.79118
YNR031C	0.09436	0.1517	-0.05318	0.03509	0.01914	0.09768	-0.14933	-0.39359	-0.02782	-0.27001	-0.08851	-0.19458	-0.25157	-0.40254	-0.30625	-0.23731	-0.41337	-0.36905	-0.41116	-0.0904	-0.16637	-0.20619	-0.22032	-0.47217	-2e-05	-0.07686	-0.23919	0.00181	-0.238	-0.23251	-0.15058	0.00435	-0.16249	-0.05732	-0.18797	-0.25502	-0.19521	-0.37555	-0.1461	-0.34723	-0.14201	-0.02944	-0.2228	-0.29584	-0.05095	-0.11985	-0.15084	0.02849	-0.37242
YGL079W	-0.16377	0.04396	-0.09864	-0.24452	-0.13452	-0.22683	-0.08888	-0.21536	-0.01889	-0.22628	-0.01296	0.2312	0.23273	0.00089	0.18563	0.38493	0.04548	0.04309	-0.30267	-0.27881	0.11276	-0.12282	-0.09467	0.08162	-0.10539	0.15019	-0.06361	-0.15087	0.22665	0.02797	0.06909	0.00435	0.29823	-0.10081	0.10569	0.00817	0.14937	-0.42496	-0.14834	0.0941	-0.13375	-0.10548	-0.09575	0.02513	-0.00171	-0.25758	-0.07566	-0.3281	0.17504
YHR084W	-0.1212	-0.38938	-0.18648	-0.16882	-0.25288	-0.26529	0.0532	0.31467	0.16604	-0.01711	0.17368	0.35452	-0.01444	0.36004	0.23423	0.09214	0.11485	0.0059	1.46654	1.46361	1.60006	1.63231	0.86059	1.18651	1.29857	1.34032	0.45515	0.12591	1.68555	0.17172	-0.4268	-0.14909	1.09391	0.50256	0.46581	0.40232	1.29725	1.39765	1.422	1.67296	0.1513	0.09276	0.28724	0.12071	-0.31308	0.20608	0.09624	-0.00143	0.26541
YOR004W	1.42083	1.08707	1.29584	1.52685	1.54688	1.64793	2.07547	2.34701	1.72511	2.01694	1.73326	2.07248	1.75077	1.70377	1.72146	1.54961	1.88771	1.69574	1.43385	1.79943	0.76366	1.11998	1.02014	1.67878	0.9705	1.11455	0.97559	0.90885	1.28027	1.01539	0.84878	1.80297	1.61343	1.18049	1.09272	1.44822	1.14616	1.56458	1.42831	1.88852	1.77974	1.45103	1.41209	1.25317	1.73417	1.53802	1.83101	1.61459	1.48621
YMR086C-A	-2.08521	-1.92487	-2.19248	-2.32823	-2.2599	-2.64569	-1.77832	-2.08912	-2.12874	-2.87935	-2.19007	-2.2351	-1.36946	-2.00276	-2.08356	-1.76949	-1.93554	-2.20805	-1.81303	-1.79393	-2.19493	-2.21722	-1.45601	-2.08688	-2.52125	-2.10164	-2.36363	-1.71955	-1.81515	-1.98899	-1.27495	-4.21128	-2.88663	-4.23456	-1.51215	-2.34862	-2.23385	-2.56876	-1.47819	-2.17852	-2.77676	-2.32906	-2.22422	-3.1583	-2.26503	-2.62566	-2.73783	-2.30219	-2.26009
YMR244W	-4.14499	-3.06005	-3.86822	-3.8371	-4.28869	-3.93994	-4.47179	-4.14817	-4.20353	-4.32386	-4.30527	-4.2871	-4.03496	-4.57166	-4.43824	-4.54989	-4.48367	-4.29953	-3.90631	-3.89038	-4.15569	-4.24785	-3.83548	-4.22467	-3.49339	-3.53519	-4.18916	-3.98508	-4.08033	-3.34222	-4.05688	-3.7791	-3.49717	-3.80816	-4.16166	-4.24739	-4.4316	-3.98607	-3.86959	-3.75949	-4.02881	-3.88504	-3.75398	-3.01116	-3.80177	-3.62476	-4.38732	-3.82937	-3.65935
YMR233W	-0.13517	-0.14703	-0.02699	-0.18352	0.10439	-0.15731	-0.08621	0.65664	-0.1113	-0.1651	0.00458	0.11056	0.0446	-0.04792	0.01103	-0.20539	-0.0045	0.19466	-0.43877	-0.34719	-0.71187	-0.37984	-0.88863	-0.11373	-0.35437	-0.55663	0.07005	-0.55701	-0.19946	-0.41014	-1.07213	-0.16682	0.00502	0.21502	-0.35165	-0.32776	-0.5627	-0.0731	-0.43089	-0.31366	-0.22401	-0.21863	-0.11543	-0.0824	0.01755	-0.15245	-0.28126	-0.25115	0.20375
YLL010C	1.08423	1.01296	1.05292	1.21938	1.00647	1.28377	1.09802	1.32056	1.2428	1.27991	1.24519	1.32716	0.98269	1.09579	0.88604	0.6021	0.73105	0.82388	1.5059	1.32709	1.57799	1.67413	1.62381	1.41646	1.17834	1.59778	1.07106	1.21687	1.25308	1.47633	1.46059	1.08226	1.30938	1.15069	1.2219	1.40112	1.05464	1.289	1.44809	1.52396	1.2342	1.02925	1.54192	0.95969	1.18836	1.14173	1.1078	1.13744	0.98167
YNL188W	-0.34981	-0.83295	-0.46944	-0.47024	-0.33245	-0.80813	-0.5614	-0.30364	-0.78455	-0.80183	-0.61356	-0.589	-0.94572	-1.28202	-1.07068	-1.20095	-1.02407	-0.86101	-0.51881	-0.16155	-1.14205	-0.79888	-1.08522	0.08619	-0.36814	-0.84016	-0.50796	-1.14066	-0.33958	-0.81744	-1.76731	-0.64768	-0.5664	-0.99034	-0.55461	-0.60013	-0.41355	-0.22054	-0.65861	-0.46619	-0.34255	-0.77908	-0.33639	-1.0884	-1.03278	-0.62354	-0.80724	-0.74689	-0.67176
YNL104C	3.01383	2.7831	2.68916	2.83975	2.7875	2.98301	3.17493	3.13806	3.31257	3.56356	3.24727	3.40285	3.03714	3.04292	2.93609	2.97834	2.72443	2.83362	2.95558	2.66577	2.87946	2.87319	3.07315	2.56512	3.05595	2.94873	3.17193	3.84773	2.74211	2.95772	5.16421	3.31312	2.55706	2.64328	3.11402	2.88828	2.77182	2.64874	2.7865	2.90992	3.4998	3.22701	2.45509	2.82382	3.02584	2.77568	2.9436	3.39995	3.35128
YKL156C-A	-4.36667	-4.31673	-4.03048	-3.61335	-4.44688	-4.25221	-4.45204	-5.33432	-4.3159	-4.42568	-4.45241	-4.96801	-4.40349	-4.55471	-4.9336	-5.3835	-5.20454	-4.90993	-5.50288	-4.31646	-3.82063	-3.9846	-5.53843	-3.87375	-4.84492	-3.95418	-4.30781	-4.54321	-5.10614	-4.1283	-5.59433	-4.81292	-4.7405	-5.25348	-4.60615	-4.45675	-4.81535	-5.56397	-3.97029	-4.308	-3.94344	-4.2782	-5.01808	-5.04012	-4.24261	-4.09463	-5.22247	-3.7335	-4.62216
YIL005W	1.09265	0.82216	1.0093	1.0306	1.0798	0.92874	0.79499	0.85318	0.81519	0.54403	0.78259	0.46935	1.00182	0.88205	0.93017	0.73687	1.0477	0.86336	0.44203	0.86023	0.81479	0.81605	0.61296	0.51851	1.1421	0.89243	0.96729	0.82936	0.81059	0.82331	0.35804	0.36474	0.51316	-0.29642	0.84299	0.8585	0.84866	0.68498	0.53321	0.8888	0.82914	0.79054	0.75639	0.59154	1.07875	0.93599	1.20691	1.21513	0.89004
YOR365C	-4.58519	-4.51498	-4.4936	-4.63829	-4.66312	-4.46569	-4.83227	-4.61125	-4.77803	-4.75619	-4.78306	-4.86568	-4.54518	-4.65138	-4.89896	-4.82118	-4.67676	-4.64197	-4.63132	-4.63952	-4.57096	-4.77858	-4.58212	-4.51628	-4.66058	-4.67608	-4.48773	-4.43683	-4.5294	-4.58419	-4.45268	-4.48797	-4.94773	-4.43749	-4.56861	-4.65187	-4.61113	-4.9122	-4.63165	-4.77974	-4.44943	-4.69516	-4.4903	-4.46095	-4.60411	-4.56484	-4.66389	-4.58111	-4.55363
YNR030W	1.61633	1.33553	1.23996	1.27698	1.27975	1.40202	1.12133	1.1212	1.13921	1.39151	1.12206	0.89776	2.13899	1.97211	1.72976	1.95137	1.64425	1.83595	1.36144	1.64763	1.10113	1.30287	1.84058	1.2661	1.08416	1.57372	1.22253	1.83514	1.1197	1.239	2.25862	0.9719	0.9312	0.92811	1.50019	1.40462	1.15901	0.9846	1.3296	1.40891	1.11683	1.23748	0.90562	1.01665	1.2062	1.00347	1.23576	1.43715	0.70814
Q0055	2.89509	2.11819	3.03968	2.60939	3.21907	2.88358	-2.84175	-3.79362	-2.05638	-3.37944	-1.879	-4.19965	3.56974	3.54102	4.00109	3.2173	3.26513	3.37531	1.39724	3.38539	1.87079	1.61134	2.38129	2.39388	2.36873	1.84107	1.90031	2.91426	1.2384	1.86218	3.14749	0.22149	-0.35873	-0.76144	2.00989	3.10173	1.3092	0.48635	2.32452	2.95345	3.13531	3.0719	1.63281	0.03541	3.10283	2.64932	2.12085	3.02975	1.67244
YBR265W	1.38565	1.48841	1.35932	1.31912	1.27162	1.47017	1.47324	1.35455	1.82203	1.44464	1.84301	1.63441	1.94743	1.7789	1.62946	1.6124	1.82708	1.41622	1.84013	1.5417	1.62274	1.88882	1.8032	1.48226	1.65386	1.93063	1.90957	1.86227	1.56803	1.51222	1.99315	1.91186	1.82752	1.96371	1.77618	1.582	1.88988	1.7724	1.6581	1.53167	1.40122	1.5723	1.31519	2.20799	1.43598	1.62397	1.84214	1.74872	1.26947
YGL131C	-0.61891	-0.91925	-0.49354	-0.71504	-0.67748	-0.74841	-0.78345	-1.11758	-0.92684	-1.01689	-1.0089	-0.98465	-1.0351	-1.28188	-1.16896	-1.2556	-1.32155	-1.47657	-0.76582	-0.74969	-0.84217	-0.96249	-0.7875	-1.09378	-0.99517	-1.15426	-0.96252	-0.52191	-0.903	-0.83719	-0.46456	-1.03441	-1.26635	-1.69011	-0.56136	-0.78849	-1.02358	-1.28512	-1.0856	-1.18302	-0.83521	-0.77542	-0.77713	-1.21542	-0.78893	-1.22971	-1.21853	-0.79339	-0.94936
YDL162C	-3.58641	-4.84121	-3.93934	-4.18115	-3.67842	-3.91257	-4.21017	-3.81802	-3.33503	-4.11675	-4.26401	-3.83148	-4.15703	-3.86903	-3.70235	-4.54989	-4.17197	-4.06272	-3.6962	-3.53484	-3.73366	-3.53222	-3.37225	-3.69205	-3.44977	-3.63924	-4.32727	-3.92572	-3.74799	-4.10267	-4.41419	-4.58899	-4.2771	-3.71794	-4.11077	-4.35734	-3.22016	-3.9102	-3.24978	-3.50874	-4.10079	-4.20255	-4.04428	-3.78988	-3.92351	-4.33032	-4.23214	-4.25346	-3.72953
YHR033W	-0.46877	-0.35854	-0.78035	-0.54438	-0.66813	-0.72282	-3.10963	-3.02412	-3.01663	-3.60085	-3.06435	-2.9935	-3.67173	-3.73327	-3.7229	-3.34428	-3.59149	-3.60975	-0.05325	-0.24256	1.12253	1.71537	-1.62907	-3.19637	-2.69354	-2.2895	-1.20351	-1.12879	-0.08181	-3.39526	-3.11109	-3.46744	-3.2396	-2.61973	-0.1849	-0.27403	-1.09681	-1.13057	-2.14837	-3.239	0.03808	-0.14818	-4.0624	-3.40414	-2.37557	-3.80653	-2.92314	-2.63875	-0.3263
YNR040W	-0.76959	-0.24385	-0.52323	-0.55346	-0.88544	-0.24489	-0.26379	-0.03432	-0.16285	-0.03799	-0.25936	0.30129	-0.02775	0.07825	0.15952	0.36998	-0.07038	0.12486	-0.73289	-1.03778	-0.61751	-0.50584	-0.07942	-0.17688	-0.90535	-0.33448	-0.40927	-0.59604	-0.73975	-0.80245	-0.41318	0.56486	0.15126	0.62875	-0.5318	-0.67921	-0.21926	-0.23583	0.00392	-0.38555	-0.44873	-0.51997	-1.00587	0.38806	-0.60409	-0.56038	-0.28711	-0.61031	-0.34735
YDR246W-A	-2.28473	-1.7984	-2.32637	-1.82961	-2.32447	-2.12057	-2.14853	-1.62438	-1.79719	-1.91384	-1.77573	-1.11714	-2.25337	-2.14878	-2.53427	-1.64331	-2.30535	-2.33288	-2.17955	-1.69165	-1.78491	-1.05959	-1.66749	-0.1994	-2.19242	-1.62716	-2.37232	-1.90213	-2.64912	-2.09932	-1.21154	-0.02928	-1.78782	-1.62337	-1.82521	1.12302	-1.9309	-1.84586	-1.75703	-0.49769	-2.22832	-2.21435	-2.26477	-1.30061	-2.10641	-1.55889	-2.90133	-1.92646	-2.42815
YNR034W	-0.34234	-0.13582	-0.54823	-0.47987	-0.60734	-0.53524	0.06403	0.06155	0.14384	0.29453	0.28809	0.08056	0.34025	0.27779	0.26656	0.50111	0.41714	0.27176	-0.42439	-0.93797	0.20389	0.24184	-0.44496	-0.6915	-0.18612	0.33369	-0.29649	-0.32716	-0.6608	-0.63338	0.26521	0.22715	0.14874	0.35737	0.29132	-0.18542	-0.0019	-0.18874	-0.53805	-0.80399	-0.24253	-0.0997	-0.32702	0.18354	-0.18887	-0.42796	-0.20034	-0.27175	0.43692
YEL076C	1.43299	1.02216	0.81082	1.21178	1.27763	1.44394	-0.38016	0.03012	0.17068	0.3417	0.05756	-0.14742	0.38791	0.43513	0.70433	-0.3101	0.17849	0.4648	0.37641	1.02762	-0.52893	-0.24612	0.73009	0.46206	1.47291	1.4924	-0.11199	0.64867	0.96479	1.43863	1.39466	1.32269	-0.63069	0.09383	0.66202	1.14785	0.07869	0.44134	0.39813	0.73242	0.58609	0.49984	0.79814	-0.40465	0.63574	1.68683	-0.98702	0.13674	0.04113
YHL046W-A	-4.66619	-5.0041	-4.58224	-4.32455	-4.66641	-4.42475	-4.80998	-4.34678	-4.47029	-4.65013	-5.37062	-4.76488	-4.74616	-4.15582	-4.74574	-5.13834	-4.75774	-5.0317	-4.75677	-4.4655	-5.16233	-4.63917	-4.45553	-2.6168	-3.5884	-4.21615	-4.43473	-5.11537	-4.47601	-4.4447	-4.74859	-3.88352	-4.92655	-4.00947	-4.72555	-3.80754	-4.58481	-4.70128	-4.52997	-4.70259	-4.13071	-4.43713	-4.13994	-4.59069	-4.34304	-4.9622	-4.6935	-4.06554	-5.15771
YDL071C	-2.50012	-2.84922	-2.23242	-2.61813	-2.37191	-3.15057	-2.57171	-2.16215	-2.47452	-2.9437	-2.49779	-2.25067	-1.88054	-1.93156	-2.56218	-2.55476	-3.02664	-3.51482	-0.99907	-2.06703	-1.68176	-1.40664	-1.62286	-1.68086	-2.39549	-1.61528	-2.52814	-2.30141	-1.98952	-2.56401	-1.26726	-2.59766	-2.1254	-2.54947	-2.18576	-2.42931	-2.46713	-2.26035	-1.48973	-1.32213	-2.95115	-2.83589	-2.51039	-2.37246	-2.27913	-2.67424	-2.9899	-2.90065	-2.77241
YOR173W	-2.56334	-2.28538	-2.31334	-2.36554	-2.5011	-2.80222	-2.40499	-2.02984	-2.1757	-2.41459	-1.70944	-2.24618	-2.20563	-2.68591	-2.63925	-2.34652	-2.67892	-3.01855	-2.69816	-2.61227	-2.39744	-2.15768	-2.08789	-2.67605	-2.28978	-2.29509	-2.44152	-2.1125	-2.99277	-2.09703	-2.84377	-1.76935	-2.5194	-1.74989	-2.55286	-2.70605	-2.39559	-2.44963	-2.21184	-2.77525	-2.19793	-1.9174	-2.44225	-2.3087	-2.75889	-2.23956	-2.45999	-1.34055	-2.22303
YOR337W	-0.05794	0.11006	0.12584	0.00423	0.06075	0.14257	0.36726	0.38854	0.45746	0.3182	0.33199	0.45734	-0.28493	-0.28425	-0.30585	-0.34268	-0.35167	-0.51973	0.4215	0.02474	-0.01023	-0.39823	0.10601	0.03874	0.10352	-0.16127	0.06354	-0.22778	0.22113	0.12113	0.63237	0.24161	0.2137	-0.20317	0.37945	0.13017	0.05995	-0.00569	0.17472	0.39097	0.41941	0.15404	0.45069	0.10165	-0.0382	0.18843	0.4294	0.12932	0.05551
YNL181W	0.26577	0.05807	0.32825	0.13994	0.44168	0.24095	-0.01276	-0.21827	0.01712	0.18978	0.0935	-0.21337	-0.35424	-0.17333	-0.0703	-0.25851	-0.07626	-0.27573	-0.06738	0.1487	-0.22738	-0.22738	-0.34605	0.0213	-0.09797	-0.40523	0.40299	-0.05305	-0.03523	-0.37109	-0.18491	-0.04335	-0.1491	-0.21478	0.05376	0.19599	-0.30865	0.11353	-0.28083	-0.09741	0.0115	0.22166	-0.02231	-0.27782	0.3618	0.21428	0.42646	0.25031	0.44494
YGL104C	-1.98356	-2.01576	-2.19325	-2.14337	-2.32377	-2.36288	-1.79966	-1.9065	-1.86334	-1.77095	-1.80687	-1.76742	-1.02695	-1.13766	-1.37691	-1.14911	-1.36288	-1.56987	-1.63094	-1.71085	-0.90531	-0.57659	-0.82307	-1.98334	-1.49021	-1.17323	-2.07199	-1.74095	-2.66694	-2.26342	-1.99236	-3.09785	-1.27277	-1.14257	-1.96641	-2.01021	-1.05667	-1.10864	-1.9363	-2.79419	-2.13497	-2.13128	-1.04038	-0.97922	-1.49973	-2.21968	-1.6362	-0.98028	-1.56513
YDR164C	0.06554	0.09412	0.22586	0.15993	0.10302	0.25216	-0.04283	-0.06763	0.21165	0.00444	0.2491	-0.10946	-0.02015	0.2	0.30194	-0.0641	0.20014	0.08205	-0.13539	0.159	-0.13009	-0.2747	-0.14327	0.17447	0.06379	-0.46553	-0.15325	-0.22094	0.28446	0.10191	-0.2195	-0.4215	0.03704	-0.54739	0.35692	0.20021	-0.13015	0.11195	0.03679	0.23168	-0.13433	0.10488	-0.06097	-0.70482	0.0757	0.06144	-0.12306	0.06009	-0.00675
YGR243W	-2.31136	-2.2191	-2.30095	-1.94755	-2.23539	-2.61014	-1.2502	-1.40377	-1.22176	-1.46247	-1.17116	-1.46601	0.11203	0.06447	-0.17536	-0.29069	-0.09368	-0.46935	-2.66457	-2.61974	-1.01669	-0.40853	-0.82625	-1.40875	-2.28929	-2.01501	-1.1355	-0.85869	-2.53117	-2.49583	-1.56639	-2.08389	-1.95406	-1.59917	-2.27232	-2.46028	-1.79587	-1.6234	-1.65011	-1.73605	-2.48535	-2.08471	-2.14818	-1.0282	-1.13752	-2.50129	-2.13863	-1.79021	-0.88047
YOR107W	-2.54629	-2.33792	-2.193	-2.28489	-2.06002	-2.57259	-1.59233	-1.95696	-1.86677	-2.03426	-1.71163	-1.4824	-0.74907	-0.88616	-0.53335	0.22466	-0.59009	-0.57179	-2.32487	-2.84144	0.11436	-0.85654	-2.21804	-1.0584	-1.4597	-1.98076	-0.77442	-0.83023	-1.20117	-1.30227	-2.52698	-1.71555	-1.51284	-1.84751	-2.48498	-2.25269	-1.08989	-1.55677	-1.63859	-0.52299	-1.17822	-2.38896	-1.90054	-1.51399	-1.2778	-1.15172	-1.53278	-1.7761	-1.14869
YDR464W	0.37029	0.07392	0.54096	0.31854	0.34794	0.17737	0.22179	0.52474	-0.04911	-0.02226	0.07263	0.23895	-0.41338	-0.50975	-0.4472	-0.65269	-0.52206	-0.10981	0.12329	0.43604	-0.40841	0.01317	-0.41904	0.34034	0.27271	0.03604	0.20281	0.29854	0.54619	0.56471	-0.86748	0.40033	-0.0868	0.17428	0.24176	0.35924	0.08064	0.42547	0.01967	0.32554	0.54176	0.20059	0.51775	-0.04816	0.45907	0.19391	0.47434	0.43854	0.00412
YGR210C	1.78085	1.99214	1.80004	1.88484	1.73852	1.78096	2.07251	1.78969	1.83594	2.07995	2.04971	2.11051	1.73427	1.64837	1.74525	1.72406	1.65978	1.68502	1.60994	1.67347	1.42251	1.58183	1.69171	1.90759	1.72537	1.91135	1.645	1.57092	1.6575	1.83275	1.67717	1.96844	2.08755	2.60995	1.53839	1.71198	1.65318	1.74486	1.91007	1.77232	1.71597	1.78723	1.87217	2.22805	1.71688	2.07398	1.64259	1.74878	1.78443
YOR168W	2.71959	2.54016	3.14832	2.88349	3.0021	2.9359	3.29122	2.94311	3.32043	3.18591	3.36435	3.16804	2.64031	2.80101	3.05545	2.66309	2.87383	3.13385	2.5012	2.78881	2.93084	2.55793	2.46464	2.6044	2.74535	2.32183	3.04811	2.6818	2.85731	2.53042	2.3569	2.58243	2.42379	1.80684	2.8837	2.86961	2.67842	2.31208	2.41757	2.75698	3.04123	3.35525	2.82806	2.08586	3.05103	2.90848	3.12553	2.81372	3.65319
YLR012C	-4.64768	-4.22073	-4.15796	-4.45131	-4.44915	-4.06052	-4.07695	-5.31204	-4.67867	-4.74106	-4.89744	-4.98843	-4.61497	-4.57166	-4.23432	-5.13823	-2.86557	-4.24018	-4.76707	-4.57004	-4.15117	-4.78012	-4.44906	-4.72289	-4.56727	-4.53763	-4.51297	-4.2427	-4.91045	-3.74404	-4.00877	-4.66349	-4.59457	-3.7879	-4.9417	-4.72057	-4.53484	-4.83706	-4.59222	-4.72193	-4.72983	-4.70911	-4.82179	-4.66604	-4.9858	-4.33768	-4.25072	-4.6722	-4.53592
YNL002C	2.44805	2.18222	2.54354	2.41113	2.58986	2.57537	2.84116	3.20213	2.70163	2.77683	2.80278	2.8448	2.88769	2.71356	2.85022	2.63532	2.71798	2.86377	2.47373	2.79814	2.13171	2.29477	2.00993	2.86855	2.11	2.06733	2.45538	1.93446	2.63286	2.46563	1.57966	2.84742	2.5375	2.09919	2.60969	2.74583	2.13363	2.11779	2.6639	2.68187	2.65045	2.31375	2.49046	1.9889	2.81056	2.8723	2.50257	2.45431	2.93284
YLR054C	-4.37533	-4.21733	-4.27983	-4.60244	-4.12581	-4.36475	-4.6959	-4.45242	-4.57457	-4.72018	-4.68719	-4.76488	-4.56231	-4.53422	-4.5573	-4.61024	-4.46293	-4.658	-4.27829	-3.9793	-4.48644	-4.48292	-4.31249	-4.15374	-4.10772	-4.42865	-4.3368	-4.47155	-4.28359	-4.09019	-4.13888	-4.46105	-4.3713	-3.99104	-4.45354	-4.54112	-4.26668	-4.42239	-4.29158	-4.44908	-4.116	-4.49082	-4.19713	-4.71562	-4.56815	-4.23176	-4.26931	-4.27698	-4.10027
YHR193C	4.74978	4.90012	5.78157	4.87851	4.68975	4.63494	5.13815	5.3906	5.64081	5.34084	5.5486	5.40378	5.29893	5.41614	5.30813	4.9744	5.38596	5.33228	4.76638	4.99425	5.00523	4.90588	4.81666	4.98929	4.76666	4.83187	5.68087	5.16064	5.32262	5.65559	4.61506	5.62673	5.04714	4.97101	5.30896	5.34039	5.12471	4.99583	5.36714	4.74059	5.33211	5.80322	4.99114	5.69565	5.92541	5.74545	5.66045	5.43329	5.74325
YNL294C	-0.07488	0.03735	-0.2063	0.07069	-0.0223	0.08217	0.06297	0.05989	0.02685	0.4158	0.02169	0.12412	-0.14711	-0.13908	-0.17082	0.00361	-0.00665	-0.05337	-0.08863	0.29947	-0.1762	0.13888	0.40127	-0.1028	0.15565	0.60733	-0.60809	-0.13126	-0.27365	0.09994	0.38053	0.19573	-0.11878	0.50728	-0.16521	0.10984	0.01254	-0.15335	0.11099	-0.04164	0.03871	-0.15413	-0.23389	0.56104	-0.25802	-0.00316	-0.05492	0.06621	-0.45577
YOR005C	-2.18622	-2.09737	-1.94641	-1.98651	-1.84466	-2.3484	-2.207	-2.22552	-2.22605	-2.27327	-2.35178	-2.06154	-2.1225	-2.25838	-1.88359	-2.09414	-2.10592	-2.48776	-2.19675	-2.39735	-2.13758	-2.22403	-2.55456	-2.48233	-2.26081	-2.53534	-2.19786	-2.35489	-2.68175	-2.34267	-2.44372	-3.1092	-2.11123	-3.41335	-2.13431	-2.56158	-2.29768	-2.25051	-2.61466	-2.44186	-2.25918	-2.20676	-2.18399	-2.7369	-2.13722	-2.35151	-2.26683	-2.12883	-1.85964
YPR147C	0.03052	-0.06447	-0.05467	-0.0988	-0.19077	-0.09507	-0.20679	-0.59443	-0.25414	-0.3576	-0.27749	-0.2368	-0.13397	-0.38231	-0.27928	-0.10156	-0.04429	-0.49099	-0.15925	-0.28795	-0.16462	-0.20994	0.25976	-0.41736	-0.28464	-0.1791	-0.50463	0.14413	-0.45153	-0.16061	0.48804	-0.35655	-0.4706	-0.21116	-0.24209	-0.35769	-0.32038	-0.48333	-0.10323	-0.44324	-0.38384	-0.36424	-0.40582	-0.34295	-0.41303	-0.44726	-0.11036	-0.08938	-0.37547
YBR092C	3.23866	2.96374	3.31515	3.21341	2.99701	3.31033	2.50791	2.34287	2.56803	2.26911	2.5566	2.62552	3.77794	3.7226	3.69061	3.87807	4.10331	4.29254	3.95904	3.66391	3.27661	3.21728	3.34636	3.3342	1.96391	2.53161	2.93719	3.32221	3.20831	2.08605	3.0019	2.70198	3.30448	3.06838	3.46342	3.68232	2.89054	2.7564	3.04868	2.9311	2.55281	2.38791	1.1291	1.82967	2.26839	2.39354	3.49238	3.12758	2.91611
YOR242C	-2.82737	-3.01553	-2.65624	-2.84556	-2.51467	-3.03538	-2.98742	-2.52502	-2.73381	-3.00838	-2.70066	-2.56599	-2.87043	-2.88099	-2.80216	-2.99146	-2.94283	-2.87415	-2.8387	-2.77865	-2.86294	-3.46499	-3.39896	-2.86746	-2.84176	-3.41938	-2.60723	-3.17803	-2.93483	-2.56401	-3.25991	-3.28036	-3.02416	-3.75405	-2.67438	-3.38745	-2.87133	-2.84093	-2.88045	-2.42521	-2.51547	-2.64122	-2.48363	-3.40414	-2.81309	-3.00724	-2.9899	-2.82175	-2.55448
YJL028W	-4.67446	-0.49254	-4.53933	-4.25571	-4.79906	-4.43564	-3.41307	-4.11899	-4.61717	-4.55133	-4.52688	-4.39379	-4.38041	-3.92368	-3.99591	-3.87529	-3.64031	-4.08746	-4.65964	-3.95688	-4.23331	-4.04512	-3.95541	-4.30421	-4.00635	-4.17459	-4.06679	-4.3819	-4.2469	-4.08816	-4.06023	-4.22548	-4.40841	-4.16795	-4.68075	-4.05164	-4.46612	-4.35733	-4.24372	-4.37689	-4.10455	-4.90414	-4.1823	-4.51809	-4.48289	-4.15542	-3.28115	-4.11413	-4.95051
YLR077W	-0.16526	-0.15581	-0.17207	-0.29499	-0.0208	-0.28832	-0.60757	-0.41762	-0.61352	-0.33386	-0.53638	-0.38533	-0.63311	-0.57794	-0.52846	-0.31363	-0.49158	-0.59611	-0.59753	-0.42139	-0.69246	-0.40209	-0.43987	-0.23385	-0.18532	-0.50527	-0.235	-0.62052	-0.36141	-0.38137	-0.49864	-0.49106	0.18765	-0.0042	-0.19616	-0.39986	-0.42337	-0.29899	-0.52423	-0.22304	-0.32489	-0.35836	-0.4285	-0.06129	-0.25146	-0.41435	-0.16476	-0.35071	-0.18922
YCR081W	-0.56148	-0.5178	-0.46722	-0.65	-0.57619	-0.63573	-0.96226	-1.12867	-0.68251	-1.03717	-0.71171	-0.79863	-0.65009	-0.79893	-0.70101	-0.65787	-0.7936	-0.93801	-0.83138	-0.91957	-0.54774	-1.02193	-0.81719	-0.86265	-0.81108	-1.15212	-0.80307	-0.70216	-0.5852	-0.76175	-0.64951	-0.92298	-0.85155	-1.21401	-0.42087	-0.61868	-0.91305	-0.97408	-0.74218	-0.65652	-0.80217	-0.66525	-0.6547	-0.77057	-0.76825	-0.68756	-0.62218	-0.99395	-0.73352
YOR396C-A	-1.01252	-0.99496	-1.04826	-0.88194	-1.01758	-0.98349	-1.1268	-1.13508	-1.42509	-1.47594	-1.45815	-1.20133	-2.87043	-2.90433	-2.98771	-2.75736	-3.06451	-3.11347	-0.64115	-1.22434	-2.14761	-1.86613	-0.04784	-1.95254	-1.67976	-0.09524	-1.65559	-0.18911	-0.74906	-0.99463	0.17519	-0.31936	-1.49248	-0.7075	-1.63762	-1.64271	-2.39788	-2.09416	-1.92161	-2.93968	-1.29678	-1.06897	-1.02047	0.06931	-1.85094	-0.95201	-2.65196	-2.102	-1.70643
YLR458W	-4.75109	-4.72857	-4.77869	-4.82864	-4.66641	-4.71444	-5.02792	-4.78855	-5.07306	-5.11215	-4.76318	-5.09536	-5.02109	-4.75259	-4.43824	-5.11717	-5.22149	-4.16705	-5.31448	-4.82437	-4.90741	-4.85815	-5.07322	-4.89233	-4.56761	-5.14224	-4.72861	-4.79961	-4.90935	-4.42905	-4.7197	-4.94414	-5.36612	-4.51132	-5.11382	-4.16404	-4.97088	-4.97438	-4.94097	-4.96719	-5.1223	-4.51786	-4.66495	-4.89398	-4.53326	-4.64742	-4.08809	-4.44207	-5.14808
YBL040C	1.77659	1.63917	1.83704	1.86814	1.74328	1.7909	1.75583	1.44068	1.68312	1.64227	1.48657	1.20078	1.94068	1.88337	1.75055	1.5446	1.52539	1.84726	1.45091	1.67717	1.80617	1.9523	1.7558	1.31337	1.72782	1.78858	1.19486	1.40813	1.37237	1.27941	2.0234	0.93782	0.80476	0.62641	1.82937	1.55477	1.38069	1.09423	1.87773	1.61066	1.81165	1.74432	1.4097	0.86573	1.51597	1.64446	1.51121	1.65919	1.48556
YJR127C	-0.005	-0.0945	-0.37828	0.19173	-0.1732	0.00351	-0.51781	-0.59988	-0.59077	-0.48586	-0.39763	-0.31056	-0.43399	-0.63636	-0.60353	-0.40179	-0.46989	-0.5076	-0.90756	-1.1672	0.34235	0.52959	-0.49608	-0.7342	-0.77653	-0.63048	0.09359	0.60489	-1.12207	-0.72274	0.88517	0.25408	-1.40365	-1.11898	-1.11261	-1.23494	-0.02632	-0.22742	-1.06252	-0.92897	0.13143	0.61893	-0.69514	-0.34581	0.17802	-0.79479	-0.6126	-0.17377	0.37365
YJL176C	0.44115	0.20745	0.50617	0.41876	0.5039	0.29195	0.37115	0.43408	0.27355	0.34429	0.45606	0.31483	0.23595	0.05584	0.1584	-0.05495	0.11047	0.22695	0.09183	0.44913	0.38022	0.3602	0.14562	0.36693	0.45168	0.41141	0.32035	0.61856	0.25885	0.47681	-0.08724	-0.0996	0.04268	-0.28775	0.48118	0.57113	0.26603	0.44269	0.20158	0.33716	0.48446	0.29926	0.74705	0.04116	0.49206	0.28942	0.25836	0.43687	0.19635
YLR453C	-1.92563	-1.68062	-1.71875	-1.59033	-1.55121	-1.76966	-1.61544	-1.49685	-1.41139	-1.82936	-1.64688	-1.59316	-1.78988	-1.61424	-1.47888	-1.80072	-1.71712	-2.28457	-1.80862	-1.91057	-1.86291	-1.93927	-1.68927	-1.47879	-1.93063	-2.38299	-1.49611	-1.93649	-2.12025	-1.78841	-1.73044	-1.74786	-1.80996	-1.14056	-1.57555	-1.75313	-1.97946	-1.85964	-1.74539	-1.64102	-1.94631	-2.03097	-1.47468	-1.02426	-1.5523	-1.61759	-1.75069	-1.86453	-1.45483
YCR007C	-2.49594	-2.44459	-2.22416	-2.34996	-2.29321	-2.10112	-1.99779	-2.20413	-2.29838	-2.49487	-2.09136	-2.26474	-1.97831	-2.22707	-2.37415	-2.60226	-2.13373	-2.37328	-1.93861	-2.38987	-1.95363	-2.42307	-2.48201	-1.82797	-2.03418	-2.3326	-2.22585	-3.00622	-2.48192	-2.44522	-2.55165	-2.82391	-2.41886	-3.6071	-2.297	-2.58155	-2.24263	-1.89566	-2.1839	-2.74321	-1.93326	-2.1759	-2.02344	-2.61083	-2.42559	-2.52274	-2.07441	-2.42881	-1.81847
YHR128W	3.51835	3.21234	3.92084	3.53672	3.7604	3.5726	4.24765	4.24049	4.53958	4.41631	4.48664	4.44094	4.53395	4.5228	4.59808	3.94902	4.49905	4.31718	3.56686	3.6564	3.26488	3.46452	4.11653	3.69608	2.99957	3.15944	3.4321	3.77925	3.3783	3.82378	3.90804	3.78015	2.9819	3.29333	3.61808	3.72722	3.24924	2.97235	3.87075	3.74836	3.78054	4.05564	3.02045	2.72622	4.27963	3.66513	3.46687	4.43067	3.63452
YOR297C	0.69399	-0.0372	0.53813	0.53831	0.52244	0.62311	0.81094	1.44051	1.06187	0.85837	0.68356	0.74537	1.56569	1.90586	1.53084	0.99055	1.68255	1.14128	0.98434	0.8664	0.99594	0.59627	1.461	0.83219	0.53618	1.39249	0.51882	1.02821	0.55983	0.59646	2.11015	0.33126	-0.72314	-0.55934	0.54103	0.63907	0.25305	0.0742	1.21298	0.94498	0.82094	0.77144	1.108	0.49945	0.80335	0.67571	0.40127	0.75474	0.72606
YDR225W	4.12451	3.87752	4.59485	4.04216	4.17013	4.13702	4.78759	4.74825	4.77459	4.34876	4.75552	4.40685	4.89665	4.5067	5.0082	4.46663	5.00953	4.96003	3.78147	4.06999	4.38481	4.40072	4.38106	4.22203	4.31297	4.31847	4.67347	4.661	4.16642	4.65328	4.64892	3.66395	3.97866	3.16687	4.30581	4.47698	4.34338	4.40177	4.31803	4.29311	4.41752	4.548	4.03968	4.74944	5.57795	4.83153	4.81535	4.75106	4.82882
YPR020W	1.75649	1.70066	1.768	1.77369	1.74688	1.89576	3.13855	3.43271	2.97562	3.03453	3.03289	3.00657	4.10803	4.22723	4.30757	3.58062	4.24906	4.03476	1.98153	1.61368	2.51403	2.73511	2.51492	2.73196	1.59452	1.29765	2.57775	2.24654	1.62165	2.18139	2.70156	2.41611	1.57429	0.47107	1.56734	1.90955	1.84612	1.86855	2.07455	1.84857	2.91065	2.80527	1.56085	1.71138	2.61883	2.09579	2.186	2.51356	2.61938
YJR003C	0.05505	0.00739	0.16696	0.27937	0.2488	0.18417	0.46562	0.67279	0.58449	0.47066	0.60424	0.42326	0.64857	0.33259	0.68246	0.17003	0.50283	0.47188	-0.03359	0.27721	0.15152	-0.16674	0.116	0.10741	0.18496	-0.09848	-0.00423	-0.10666	0.12837	0.40195	0.16486	-0.30043	-0.04954	-0.19798	0.26975	0.42078	-0.16101	0.25094	0.32278	0.43043	0.22929	0.19435	0.2925	-0.02091	0.36723	0.24678	0.24502	-0.23594	0.25165
YIL101C	-3.40009	-3.52879	-3.76383	-3.5442	-3.63283	-3.8726	-3.78882	-3.30255	-3.48319	-3.96594	-3.50912	-4.03085	-3.97654	-4.06817	-4.19202	-3.96482	-4.13141	-4.1664	-3.00019	-3.37861	-2.07747	-1.00567	-2.01954	-3.46781	-2.03747	-1.67654	-2.9882	-2.59191	-3.45698	-3.56707	-3.05585	-3.69432	-4.05167	-3.29293	-3.868	-3.5667	-2.67477	-2.70375	-1.96079	-2.79308	-2.1646	-1.54625	-3.7445	-3.38884	-2.8026	-3.7572	-2.13375	-0.79089	-3.53214
YHR136C	2.60576	2.30634	2.54564	2.52557	2.35403	2.50536	-2.25651	-2.27882	-2.36101	-3.35554	-2.48329	-2.9037	-2.82383	-3.39583	-3.21483	-3.64197	-3.55239	-3.46608	2.28401	2.30657	1.90313	2.30705	-0.78903	-2.29142	0.64554	1.54637	2.83884	3.14283	2.86913	1.91525	2.21148	2.80367	-0.8019	-0.35034	2.77432	2.85822	-1.89068	-1.31717	-2.42274	-3.26579	-1.76809	-1.7202	-2.40409	-1.32575	-1.33089	1.78354	-2.33144	-3.23098	-0.35884
YPL189W	-2.97219	-2.73393	-2.98574	-3.03678	-2.7712	-3.28533	-2.0414	-1.96272	-1.9928	-1.93057	-1.84617	-1.76862	-1.33004	-1.48635	-1.46484	-1.59558	-1.37466	-1.27976	-2.22967	-2.50593	-3.21691	-3.54618	-1.57863	-2.16608	-2.60419	-2.87758	-3.16954	-3.42799	-2.98688	-1.92501	-1.38147	-2.85407	-2.17119	-2.77246	-1.851	-2.0277	-2.36751	-2.59589	-1.81093	-2.39182	-1.79249	-2.11018	-2.77519	-2.90549	-2.95813	-1.81104	-2.51313	-1.92895	-2.94336
YPR114W	2.5934	2.33004	2.32037	2.52802	2.5867	2.35448	2.40417	2.06782	2.05669	2.28396	2.19522	2.43986	3.19143	3.06703	2.97289	2.98495	2.72253	2.80874	2.63951	2.00411	2.83201	2.76415	2.9887	2.3667	2.14874	2.41795	2.27274	2.34002	2.61657	2.36649	2.86735	2.41994	2.75756	2.81744	2.62644	2.45535	2.61141	2.66411	2.92557	2.7152	1.93599	1.8822	2.42326	2.52101	2.02976	2.57411	1.95243	1.96735	2.49757
YJL056C	-0.49744	-0.25482	-0.32825	-0.20112	-0.66319	-0.24069	-1.14411	-1.22722	-1.10969	-1.33474	-1.01218	-0.97074	-1.43411	-1.68482	-1.57439	-1.26211	-1.44829	-1.60973	-0.84934	-1.1098	-0.802	-1.07049	-0.3164	-0.6053	-1.0637	-1.23904	-0.27268	-0.12555	-0.58785	-0.61534	-0.73104	-0.74438	0.05662	-0.54535	-0.86008	-1.1675	-1.17411	-1.25746	-1.01115	-1.14292	-1.17946	-1.04903	-0.52571	-0.19687	-0.57393	-1.01617	-0.9672	-1.23386	-0.72796
YDR482C	0.24513	0.4177	0.17741	0.34356	0.43207	0.37538	0.36516	0.94762	0.31227	0.30729	0.53866	0.69285	0.39926	0.47981	0.04689	0.58955	0.36886	0.44154	0.52541	0.21205	-0.02197	0.58804	0.37721	1.08048	0.68534	0.45153	0.85667	0.33259	0.58122	0.51329	-0.03488	1.20612	1.24717	1.68572	0.40678	0.25316	0.56153	1.00658	0.64128	0.44383	1.09807	0.5869	0.984	0.73885	0.32667	0.54475	0.68948	0.56731	0.25165
YPL247C	-0.72469	-0.21031	-0.85076	-0.56941	-0.87258	-0.63984	-0.65691	-0.59791	-0.39586	-0.51016	-0.32452	-0.40245	-0.17449	-0.18032	-0.4399	-0.08022	-0.5395	-0.65562	-0.15331	-0.83768	-0.33762	0.09466	-0.02072	-0.52275	-0.44452	-0.05135	-0.6859	0.15634	-0.57457	0.44077	0.25144	0.05685	0.40038	0.6433	-0.3104	-0.62315	-0.32331	-0.0483	-0.09931	-0.52086	-0.68033	-0.40055	-0.47741	0.54894	-0.76624	0.38178	-0.42442	-0.25761	-0.4617
YBL058W	1.70368	1.73751	1.40632	1.65935	1.70165	1.49025	1.40825	1.21861	1.3442	1.46524	1.42496	1.31413	0.93527	0.85985	1.02003	1.29515	0.72298	0.91825	1.37472	1.45797	1.39227	1.50474	1.25097	1.2561	1.62468	1.71117	1.53594	1.47789	1.27792	1.54901	0.92372	1.67906	1.85145	2.49711	1.37672	1.43964	1.45021	1.81427	1.32281	1.23632	1.64105	1.88134	1.40071	1.68113	1.32209	1.73403	2.00357	1.95265	1.67688
YJL122W	2.17948	2.31797	2.35224	2.31937	2.19063	2.24874	2.90632	3.58526	2.93378	3.21051	3.03534	3.15349	3.18133	3.08165	3.12806	2.73922	2.95691	3.18046	2.53442	2.82356	2.26952	2.5009	2.16332	3.08776	2.26164	2.26822	2.95905	1.79643	2.6123	2.61932	1.60205	2.76205	2.79787	2.60405	2.35547	2.83839	2.37408	2.36103	2.4811	3.14665	2.72507	2.47065	2.80443	2.4069	2.57106	2.7295	2.86634	2.50374	2.99999
YKL107W	-4.01831	-3.65968	-4.05725	-4.23207	-4.25796	-4.21144	-4.15949	-4.27157	-4.36464	-4.6259	-4.26401	-4.01443	-4.20173	-4.33894	-3.84296	-4.09649	-4.09786	-4.16705	-3.99214	-3.86317	-4.12063	-4.02788	-3.93109	-4.39199	-4.04216	-4.09643	-4.28799	-3.87916	-3.78756	-3.88934	-4.22105	-3.98948	-5.01205	-4.25283	-3.9635	-4.31564	-4.16158	-3.69498	-3.81378	-4.36323	-4.41283	-4.22747	-3.79004	-4.11859	-3.87016	-3.76465	-4.34684	-4.14522	-3.65255
YLL039C	1.08191	0.92557	1.04836	1.19711	0.93213	1.00842	-0.07645	0.24181	0.16822	0.4249	0.15064	0.18358	0.42403	0.03041	-0.0209	0.15144	0.17054	0.07918	0.76487	0.86789	1.18677	1.20625	0.92279	1.17483	1.36916	1.11859	1.507	1.32379	0.72701	0.76288	0.70675	0.41492	0.5544	0.8551	0.84152	1.27895	1.04622	0.66594	0.7295	1.45036	1.17511	1.14456	0.35776	0.98931	0.67605	1.07807	1.52604	2.03157	0.52124
YCL017C	1.91505	1.90027	1.83478	1.81247	1.60571	1.87618	2.00975	1.98203	2.30322	2.31012	2.17916	2.31201	2.78492	2.61317	2.47719	2.55906	2.48606	2.48394	2.08108	2.17641	2.18753	2.24419	2.4148	2.03593	1.79422	1.83679	2.23315	2.71822	1.7303	2.35511	3.04155	2.52002	1.769	1.72194	2.06669	1.85532	2.01094	1.89705	2.15015	1.74184	2.42841	2.34694	2.07446	2.07797	1.90559	2.28253	2.46735	2.32125	2.31231
YER085C	-3.72714	-3.48147	-3.67164	-3.76637	-3.52453	-3.96268	-4.02842	-3.77983	-3.92588	-4.11965	-3.9067	-4.16451	-4.14816	-4.52645	-4.03381	-4.27857	-4.28988	-4.37981	-4.15825	-3.66621	-4.28593	-4.32054	-3.84589	-3.85239	-3.62614	-3.81805	-3.52134	-4.27755	-3.87099	-3.71579	-3.5626	-3.86849	-4.59248	-3.78977	-3.45043	-4.06588	-4.56338	-4.03453	-3.88219	-4.28204	-3.85866	-3.58064	-3.63726	-4.15079	-3.80898	-3.90292	-3.76326	-3.41133	-3.8872
YMR186W	4.83546	5.02029	5.30925	4.78067	4.95559	4.82988	4.94017	5.00872	5.09385	5.03023	5.13106	4.92148	4.55655	4.74681	4.76861	4.64208	4.91797	4.92603	4.41463	4.50338	4.56867	4.50286	4.57565	4.15358	4.66656	4.43146	5.30873	5.32707	4.50059	5.01184	4.91064	4.41572	4.06164	3.89672	4.81146	4.8188	4.43587	4.56897	4.48907	4.24575	5.5242	5.83301	4.62655	5.00332	5.68034	5.26608	5.50902	5.69726	4.88251
YCR065W	1.42877	1.59835	1.42708	1.54519	1.28298	1.52939	1.26379	1.19532	1.47675	1.06944	1.53318	1.35763	1.15296	1.37432	1.42636	1.13174	1.22878	1.00118	1.66576	1.54701	2.1651	2.11965	1.7417	1.38221	2.00819	2.0072	1.26039	1.692	1.64234	1.9233	1.75948	1.21254	1.82413	1.59883	1.61252	1.49836	1.8699	1.86351	1.62627	1.71699	1.28278	1.34527	1.56029	1.49434	1.2636	1.62507	1.34105	1.43343	1.18993
YFL045C	4.06338	3.75787	3.94955	3.77128	3.9336	3.98391	4.32197	4.17793	4.40638	4.19612	4.45501	3.98853	4.96632	4.77816	4.82396	4.56519	4.99437	4.66456	4.06444	4.15936	3.88327	3.90441	4.26317	4.13108	3.48625	3.81776	4.21257	4.46879	3.70874	3.61628	5.10812	2.9644	3.09657	2.03207	4.00267	4.07788	3.38791	3.70408	3.96898	3.89262	3.95502	3.62516	3.99695	3.99737	4.43851	3.77132	4.28265	4.23249	4.00765
YOR388C	-4.13397	-3.52464	-3.65657	-3.97393	-3.64484	-4.02531	-3.37999	-3.49995	-3.38222	-3.8361	-3.62063	-3.58265	-4.21297	-4.15582	-4.22347	-3.86105	-4.201	-4.39059	-4.02645	-4.09792	-4.05238	-4.21835	-1.5146	-3.51444	-3.73541	-3.93925	-3.33833	-4.01023	-1.38429	-3.60695	-4.40431	-4.49292	-4.68563	-4.49266	-4.3965	-4.54112	-4.01698	-3.78781	-3.61726	-4.18849	-4.15986	-4.20255	-1.61329	-1.34626	-4.21042	-3.78173	-4.34684	-4.41725	-1.11869
YLR002C	1.01307	1.08502	1.1562	1.1288	1.2805	1.00776	1.08191	0.80062	0.90254	1.31813	1.0751	1.15133	0.92777	0.8382	0.94909	0.67422	0.94386	0.95351	0.91865	0.9429	0.7357	0.22488	0.65451	1.36374	0.45821	0.02277	0.95444	0.40298	1.10088	0.81819	0.41371	0.58167	0.81715	0.78501	1.10799	1.24042	0.5986	0.69248	1.04676	1.40763	0.96423	0.86696	1.04917	0.57827	1.06457	1.13507	0.72764	0.52602	1.0915
YPR091C	0.88927	0.67132	0.71217	0.72998	0.74794	0.78983	0.49034	0.50041	0.41686	0.33035	0.39364	0.34275	0.59596	0.62986	0.53967	0.58893	0.37708	0.67556	0.34382	0.56581	0.55841	0.82397	0.64322	0.51935	0.83795	1.32154	0.80072	0.92195	0.53847	0.52276	0.10216	0.32389	0.25279	0.34924	0.43655	0.5957	0.83056	0.80051	0.58509	0.47046	0.77208	0.68252	0.734	0.36628	0.73802	0.74213	0.63899	0.84406	0.42702
YOL083W	-2.96091	-2.65424	-2.49577	-2.6541	-2.76039	-2.76447	-2.80015	-2.47384	-2.53969	-3.3378	-2.88246	-3.40154	-3.77379	-3.89108	-3.97171	-4.1854	-3.44426	-3.73605	-2.37753	-2.63648	-2.0934	-2.60596	-1.99868	-2.84857	-1.66058	-1.30239	-2.0013	-2.14903	-2.6541	-1.9132	-2.75756	-3.23846	-2.9477	-3.58963	-2.94583	-3.34983	-1.594	-1.99538	-2.45308	-3.52966	-2.68841	-2.56673	-1.75617	-2.15706	-2.35574	-2.07377	-2.67896	-2.05534	-1.977
YDR366C	-3.71669	-3.73313	-3.37105	-3.07471	-3.2011	-3.07346	-3.74668	-4.13792	-4.48629	-4.77844	-3.91684	-4.44468	-3.50373	-4.12711	-4.03283	-3.73823	-3.84165	-2.01961	-4.2616	-3.07096	-3.86895	-3.17209	-3.20217	-3.96556	-3.48594	-4.34728	-4.80286	-3.83364	-4.06316	-4.26236	-4.4433	-4.1791	-4.81658	-1.00398	-4.17554	-3.94255	-4.51401	-4.06842	-3.74003	-4.48894	-4.17464	-4.46406	-3.72624	-3.71663	-4.14753	-4.31601	-3.59408	-3.5586	-4.43308
YLR307C-A	-4.59899	-4.17744	-3.87272	-4.74605	-4.30456	-3.97285	-4.2269	-4.46647	-4.98758	-4.39734	-4.29771	-4.55532	-4.58721	-4.61113	-4.30222	-4.44524	-4.34466	-4.55592	-3.08514	-3.49708	-4.15569	-4.90593	-2.82012	-4.03499	-4.39608	-4.18457	-4.34717	-4.20064	-4.3923	-3.54295	-4.53082	-2.91536	-3.41123	-1.86099	-4.28331	-3.75999	-4.06582	-4.44461	-3.45048	-4.09178	-4.36793	-4.38267	-4.5085	-3.75355	-4.25985	-3.94571	-4.37399	-4.69768	-4.63917
Q0065	2.65703	0.39774	2.81975	2.19983	2.71897	2.41861	3.26098	3.36079	3.42352	2.50146	2.61025	1.73363	-2.17985	-2.93514	-1.53944	-4.62069	-2.71075	-4.23258	0.36789	3.3456	1.38108	1.53979	1.79075	1.53774	1.85713	1.9514	1.73102	2.93574	1.03358	1.89646	2.07174	-0.95249	-1.29497	-2.32027	1.38402	2.25953	1.0847	-0.11128	1.75173	2.6923	2.42286	2.61163	1.61516	-1.29193	2.94086	2.02707	0.97675	3.15017	1.22931
YER190C-A	-1.2333	-0.9683	-1.84772	-1.08684	-0.80805	-1.80978	-1.14876	-1.36407	-1.48045	-0.81522	-1.4043	-0.86559	-2.04872	-2.44867	-2.56209	-2.7332	-3.63385	-3.77319	-1.5716	-1.90835	-1.44696	-1.75186	-1.07584	-2.30139	-1.44595	-0.48471	-1.57014	-0.25631	-1.83658	-2.13003	-0.88162	-0.70437	-1.1903	0.22834	-1.75659	-2.03403	-2.30507	-2.20266	-2.67062	-1.64177	-1.632	-1.41207	-1.97846	0.20958	-1.63008	-1.9077	-2.69464	-2.04331	-2.62288
YDR545C-A	-0.95105	-0.8627	-1.2654	-0.87659	-1.22968	-0.91154	-1.36813	-1.28735	-1.59524	-1.47334	-1.43288	-1.21763	-2.76484	-2.98076	-3.15014	-2.42293	-3.29347	-3.81051	-0.81984	-1.33001	-2.01022	-1.94939	-0.20566	-2.10836	-1.83498	-0.09863	-1.71162	-0.16185	-1.15704	-0.93499	0.02838	-0.42786	-1.35166	-0.1523	-1.84917	-1.73201	-2.37601	-2.01542	-1.70984	-3.32789	-1.32432	-1.09498	-0.95361	0.5912	-1.63307	-0.85297	-2.44596	-2.14659	-1.76004
YNL020C	-1.05851	-0.78018	-0.84539	-1.09265	-1.01254	-0.94424	-1.31871	-1.15277	-1.18786	-1.57417	-1.23698	-1.15881	-1.41649	-1.5858	-1.53074	-1.12346	-1.31254	-1.37699	-0.71	-1.21593	-0.66433	-1.09228	-0.99177	-1.18132	-1.10295	-0.99858	-1.01812	-0.92186	-0.66303	-0.81744	-0.60453	-0.78137	-0.76659	-0.9856	-0.52814	-0.83828	-0.75043	-1.01254	-1.17607	-1.52629	-0.91081	-1.14485	-1.15093	-0.65773	-1.00918	-1.17305	-0.9685	-1.34055	-0.97632
YGL125W	0.41976	0.25715	0.02528	0.17968	-0.15064	0.08521	0.87744	0.62508	1.06899	0.71641	0.94106	0.81504	-0.50759	-0.83676	-0.93844	-0.94323	-1.26964	-1.26054	2.98224	2.89393	1.13862	1.6576	0.23884	-0.61825	0.6822	0.4554	1.99175	3.20925	0.48067	0.27371	4.00759	3.04101	2.1538	2.10009	2.00237	1.61788	0.74656	0.20441	-0.92804	-0.75519	1.55617	0.85946	-0.81725	-0.61996	1.81436	-0.43568	0.82317	1.32889	-0.4584
YKR038C	0.75073	1.06378	0.69529	1.0403	0.82397	0.69306	1.09769	1.12891	1.21078	1.26602	1.06637	1.23829	1.11786	1.14097	1.21028	1.43647	1.1208	1.5072	1.09389	1.04711	1.10444	0.9183	1.20185	1.09789	1.42558	0.97187	0.7548	0.62819	0.9833	1.09209	1.23359	1.36472	1.51893	1.60943	1.01426	0.82622	1.13113	1.19696	1.23922	1.45461	0.95137	1.27767	1.0906	1.6573	1.12421	1.05784	1.26325	0.85504	0.86922
YDL215C	-0.59654	-0.69992	-0.46185	-0.55547	-0.54012	-0.52737	-0.77863	-1.1404	-0.72229	-0.44186	-0.60443	-0.79558	-0.67139	-0.83676	-0.60207	-0.61453	-0.65735	-0.82073	-0.28358	-0.59645	0.27023	-0.21682	-0.40024	-0.79901	-0.0054	-0.22157	-0.45737	-0.17679	-0.5389	-0.871	-0.20957	-0.78855	-0.65632	-1.17754	-0.53116	-0.5728	-0.64162	-0.85436	-0.54113	-0.49868	-0.7248	-0.64527	-0.6581	-0.86695	-0.66414	-0.65211	-0.63866	-0.56472	-0.55588
YCR022C	-3.03734	-2.99027	-3.05832	-3.18028	-3.23363	-3.49447	-1.9788	-2.14267	-2.09646	-2.83142	-1.96768	-1.92911	-2.41047	-2.57351	-1.67701	-2.57359	-3.28625	-2.31343	-2.3459	-2.69931	-3.09803	-2.85816	-2.49146	-2.8436	-2.97913	-2.11559	-2.98561	-2.46734	-3.4577	-2.60458	-2.75274	-4.0522	-2.71782	-1.17245	-3.02764	-2.93305	-2.71242	-2.65332	-2.85594	-3.19929	-2.88409	-2.88856	-2.93975	-1.94448	-2.72703	-3.09535	-3.2037	-2.88969	-3.22398
YLR354C	3.67468	3.76375	3.83464	3.6528	3.65262	3.71346	3.63726	3.67486	3.65338	3.5481	3.57936	3.5531	3.85503	4.18106	4.12343	4.11029	4.10833	4.25296	3.6858	3.26219	3.75974	3.66318	3.20824	3.26454	3.85273	3.73063	4.83511	4.88531	3.05562	3.18147	4.32917	3.94138	3.70646	3.31868	4.29615	4.22635	3.75433	3.74538	3.3673	3.39869	4.13712	4.08457	4.17581	3.80853	4.05994	3.44373	4.05084	4.02392	3.83577
YFR008W	-2.05792	-1.51855	-1.85324	-1.70421	-1.6679	-1.64029	-1.83813	-1.7491	-1.54441	-1.78164	-1.81599	-1.95999	-2.37684	-2.58473	-2.33231	-1.88989	-2.24896	-2.48776	-1.85254	-2.0717	-1.67307	-1.73797	-2.27277	-2.02643	-1.53917	-2.1411	-1.58385	-2.02303	-2.47872	-2.12726	-2.49762	-2.08702	-1.36441	-1.42506	-2.05608	-2.26014	-1.59951	-1.26609	-2.07776	-2.2311	-1.62931	-1.74673	-1.86264	-1.86678	-1.69298	-1.69215	-1.43623	-1.70334	-1.54345
YDR284C	0.85093	0.96617	0.45769	0.71291	0.70075	0.69074	0.41244	0.20015	0.30194	0.7473	0.61207	0.44919	1.14608	0.89042	0.90023	1.27206	1.2598	1.08285	0.54343	0.26393	0.9099	0.83758	1.03384	0.16322	0.81287	0.8822	0.36431	0.95941	0.59694	0.70981	1.48528	0.24002	0.45463	0.02382	0.28584	0.38487	0.6967	0.57363	0.52504	0.40539	0.72734	0.84525	0.39547	1.12848	0.80128	0.52026	0.87578	0.88496	0.39943
YFL013C	-0.26864	-0.41856	0.00503	-0.17964	-0.00854	-0.19277	-0.43347	-0.31897	-0.49861	-0.62657	-0.43905	-0.28236	-0.78224	-0.86525	-0.69924	-0.80273	-0.84908	-0.56547	-0.36666	-0.43217	-0.50719	-0.46155	-0.7921	-0.05844	-0.51488	-0.89796	-0.01539	-0.48234	-0.14282	-0.3187	-1.42459	-0.07073	-0.32329	0.08888	-0.71041	-0.45432	-0.27729	-0.13695	-0.56155	-0.33544	-0.08387	-0.27452	-0.12186	-0.3729	-0.14779	-0.21397	-0.22674	-0.20421	-0.33348
YKL051W	0.41624	0.1506	0.03872	0.29415	0.0953	0.04752	0.61633	0.94975	0.60389	1.0869	0.66691	1.01391	2.55764	2.30404	2.03926	1.75626	1.92028	2.10035	0.06034	-0.57203	0.76701	0.34691	1.56992	0.69755	0.06974	0.61119	-0.35092	0.26258	-1.06442	0.3733	1.34382	0.50442	1.01282	1.32529	-0.3551	-0.28092	1.3027	1.48825	1.6025	1.56753	1.16509	1.0661	1.39543	1.04661	1.16599	-0.01316	0.8053	1.54466	1.32634
YPR174C	-0.1935	0.09549	-0.06	0.0574	-0.16066	0.02679	0.06109	0.25847	0.04352	0.12445	-0.20529	0.12601	-0.50676	-0.69315	-0.36979	0.07521	-0.60895	-0.39598	-0.06461	-0.32026	-0.25926	-0.11661	-0.58863	-0.03857	0.07706	-0.13542	-0.37332	-0.86579	-0.50248	-0.11322	-0.49758	0.90175	0.19889	0.7766	0.09002	0.08177	-0.22136	0.16499	-0.2853	-0.09219	-0.32911	-0.43519	-0.06387	0.28978	-0.50873	-0.19579	0.2735	-0.54893	-0.33468
YJL143W	2.8227	2.75843	2.66651	2.96027	2.91807	2.57105	3.58139	3.39774	3.31587	3.79363	3.14711	3.69373	4.11637	4.02239	3.86932	3.62641	3.47378	3.7632	3.41753	2.8314	3.32584	3.44873	3.50692	3.09146	2.59317	3.35893	3.301	3.51738	2.89656	3.02357	4.49768	4.09825	3.12071	4.00285	3.13091	2.9612	3.00463	3.03018	3.2097	2.75173	3.22195	3.26184	3.19893	4.11884	3.31917	3.26305	3.30664	3.15527	3.24578
YDR112W	-4.3495	-4.55588	-4.85107	-5.18268	-4.65982	-4.456	-4.49098	-4.95524	-5.26123	-4.63971	-4.88702	-4.51961	-5.05014	-4.67123	-4.73418	-4.75141	-5.06274	-4.82688	-4.7168	-4.66124	-4.41109	-4.19008	-4.99796	-4.74782	-4.91788	-4.24976	-4.68159	-4.71597	-3.96224	-4.19295	-4.82677	-4.25227	-5.19993	-4.96777	-4.59265	-4.01183	-4.70525	-4.65224	-4.31774	-3.87875	-4.91419	-4.49082	-4.71996	-3.71663	-4.60411	-4.31601	-4.24431	-3.85925	-5.14808
YMR091C	1.20105	1.04372	1.23429	1.22073	1.28662	1.26373	0.77058	0.74175	0.84077	0.86505	0.92971	0.78078	0.763	0.7827	0.77176	0.63005	0.78234	0.90832	0.85728	1.11113	0.65698	0.6258	0.38637	0.88341	1.00918	0.33457	1.17985	0.815	0.95853	0.86052	0.26393	0.72331	0.43735	0.63451	0.79994	0.92042	0.97586	0.50496	0.42004	0.90957	0.81292	0.91677	0.82684	0.09405	1.01301	0.9318	1.09925	1.02835	1.08492
YGR057C	-0.67804	-0.77578	-0.72408	-0.89265	-0.48602	-0.9126	-0.51394	-0.71632	-0.39415	-0.45309	-0.28931	-0.33711	-0.1489	-0.64786	0.06054	0.15722	0.05321	0.53076	-1.06266	-1.05314	-0.44865	-1.41664	-1.0588	-1.13986	-0.39396	-0.98163	-0.41161	-1.55858	-0.99155	-1.07397	-0.84464	-0.79954	-0.51123	-0.9449	-0.57263	-1.02375	-0.3439	-1.10741	-0.54942	-0.74833	-0.43932	-0.41042	-1.15828	-0.71566	-0.66189	-0.53681	-0.41497	-0.95306	-0.65218
YKL194C	-1.01462	-1.07653	-0.96976	-0.92465	-0.90436	-0.84716	-0.32706	-0.42423	-0.31894	0.01217	-0.17323	-0.35416	-0.11751	-0.00545	0.09275	-0.00392	-0.18806	-0.2072	-0.51294	-0.83724	-0.52932	-0.6554	-0.09841	-0.71777	-1.21981	-0.92948	-0.56299	-0.43688	-1.18147	-1.04824	0.20426	-0.26103	-1.06408	-0.69289	-0.92247	-0.98995	-0.47777	-1.01403	-0.58317	-0.84755	-0.60979	-0.55607	-1.00385	-0.75052	-0.75487	-0.70638	-0.42162	-0.46152	-0.52553
YLR308W	-4.64038	-4.51885	-4.73073	-4.80506	-4.67506	-4.65511	-4.88206	-4.77383	-4.9256	-4.64771	-4.66107	-4.94641	-4.45435	-4.3851	-4.88709	-5.05474	-4.47943	-4.21785	-4.48476	-4.76573	-4.22	-4.76242	-4.57639	-4.48465	-4.69025	-4.74304	-4.95605	-4.54369	-4.31347	-4.25547	-4.49112	-4.46965	-4.88508	-4.88157	-4.59682	-4.03474	-4.63472	-4.50063	-4.80087	-4.59848	-4.41172	-4.86256	-4.60554	-4.80194	-4.76997	-4.85214	-4.58133	-4.69768	-4.39848
YBR065C	-0.38994	-0.13517	-0.03066	-0.28596	-0.20057	-0.35764	-0.12682	-0.19042	-0.31854	-0.17834	-0.14919	0.08542	-0.67139	-0.38231	-0.57765	-0.71514	-0.4823	-0.69348	-0.18481	-0.32806	-0.11784	-0.50217	-0.81311	-0.35845	-0.1016	-0.6913	0.38424	-0.51566	-0.15711	-0.21789	-0.52311	-0.04092	0.18179	0.45726	-0.4868	-0.60013	-0.51056	-0.1306	-0.57402	-0.36268	-0.09525	-0.14271	0.16244	-0.27202	-0.25442	0.09496	0.22419	-0.07152	0.14553
YMR029C	-0.26511	-0.41683	-0.20248	-0.32918	-0.31531	-0.24083	-0.2573	-0.08923	-0.30599	-0.54088	-0.26529	-0.50043	-0.60821	-0.73961	-0.57991	-0.44082	-0.44689	-0.29216	-0.56224	-0.42894	-0.56833	-0.51565	-0.86074	-0.63952	-0.24481	-0.75197	-0.28719	-0.49164	-0.56696	-0.47923	-0.8752	-0.42028	-0.38956	-0.69371	-0.51689	-0.33908	-0.58081	-0.2219	-0.80716	-0.64879	-0.38541	-0.27747	-0.33592	-0.46656	-0.32502	-0.34608	0.05368	-0.22135	-0.04154
YHL042W	-2.43379	-3.34462	-2.62573	-2.3318	-2.29409	-2.55312	-0.92388	-1.15069	-1.28157	-0.88572	-1.0349	-0.69361	-1.27908	-2.05415	-1.84587	-1.49942	-1.91747	-1.88199	-0.59543	-1.41488	-0.77425	-1.1822	-2.21984	-3.22363	-2.46014	-2.12441	-1.04956	-1.19786	-2.18077	-1.78656	-1.79514	-3.31255	-3.59538	-2.05966	-2.35491	-3.08665	-2.35462	-2.39395	-2.69885	-3.10113	-1.07892	-1.51128	-2.36875	-2.09185	-2.327	-1.90901	-1.723	-1.39552	-1.71503
YLR156C-A	-3.76091	-3.14829	-3.5411	-3.29401	-3.23942	-4.43496	-3.76051	-3.26413	-3.55496	-3.64203	-4.19348	-3.05246	-4.04337	-3.35968	-3.85957	-4.5716	-4.04093	-4.64998	-2.43723	-3.70509	-3.02783	-3.50095	-3.69228	-2.06181	-3.59503	-4.1183	-2.45248	-3.71126	-3.87485	-4.21375	-2.09659	-2.90395	-2.2944	-3.80117	-3.58871	-2.53052	-2.98065	-2.52692	-4.2939	-3.10634	-3.57903	-3.53917	-2.63561	-3.19965	-3.92342	-2.32931	-3.12663	-3.58144	-2.49766
YNL068C	0.58524	0.52773	0.69868	0.50342	0.48963	0.43737	0.65121	0.62862	0.49055	0.39321	0.64608	0.65753	0.37634	0.33994	0.46203	0.1285	0.28191	0.46779	0.35487	0.48811	0.22105	0.20583	0.15974	0.7526	0.44964	0.05394	0.71069	0.53806	0.96573	0.85521	0.10915	0.37357	0.58807	-0.05962	0.61588	0.65337	0.5457	0.44979	0.397	0.91689	0.71527	0.58326	0.71002	0.36742	0.73727	0.60465	0.83804	0.53161	1.04928
YPR121W	-2.37473	-2.30788	-2.29536	-2.11778	-2.23632	-2.54333	-2.14522	-2.0658	-2.1937	-2.53691	-2.26231	-2.31673	-2.62907	-2.89884	-2.44552	-1.84418	-2.31218	-2.99314	-1.50543	-1.88435	-1.60844	-1.9129	-1.22852	-1.38592	-1.68825	-1.66303	-2.18523	-2.28982	-1.42909	-2.26872	-1.78238	-1.90346	-0.96345	-0.7791	-1.99347	-2.59613	-1.08643	-1.11759	-1.69392	-1.71489	-2.41021	-2.31219	-2.05797	-1.63649	-2.35943	-2.28369	-2.38186	-2.47592	-2.01162
YGL178W	1.40058	0.99012	1.18294	1.0471	0.84753	1.17839	1.2946	1.09622	1.38898	1.03425	1.36086	1.14199	1.7087	1.49686	1.48516	1.13532	1.43006	1.44389	1.92288	1.9742	1.58564	1.53566	1.73652	1.44724	1.18282	1.46787	1.19363	1.59487	1.24138	1.29687	2.25047	1.0517	0.48031	0.38094	1.49901	1.72822	1.295	1.3941	1.66428	1.68883	1.36533	0.98391	1.40437	0.32597	1.33705	0.91189	0.65313	1.20207	0.71243
YGL157W	1.22487	1.55215	1.60831	1.66787	1.34208	1.64735	0.61945	1.00977	0.98321	0.77009	0.80392	0.67867	0.88263	1.06338	1.10858	1.04604	1.20647	0.84873	1.0291	0.99464	1.19798	0.80635	0.60706	0.696	1.66246	2.03452	0.81903	0.86352	1.43148	1.34621	0.86731	0.50868	0.79735	0.73757	1.4172	1.21768	0.98928	1.26083	1.31241	1.5181	0.46792	0.42152	1.02761	1.13915	1.42617	1.63608	1.37285	1.96204	1.18163
YMR148W	0.80784	0.91549	0.58474	0.60469	0.57679	1.07628	0.91077	1.10306	0.65127	0.94829	0.61094	0.76911	1.24628	1.47043	1.00398	1.34053	1.0755	0.88995	0.97663	0.90083	1.15203	1.59648	1.47568	1.20031	0.89366	1.60841	0.87259	1.6609	0.46852	0.46586	1.57917	1.17699	0.82703	2.04031	0.24767	0.24736	0.95955	1.22222	0.84919	0.99976	1.00886	0.64231	0.59246	1.48552	1.28512	0.25843	1.17387	1.30276	0.78713
YML058W	4.05282	3.60191	3.76298	3.80611	3.90976	3.97185	4.4475	4.33337	4.11439	4.32895	4.31161	4.11111	4.63107	4.56837	4.40829	4.1385	4.6769	4.39233	4.39969	4.08894	4.21869	4.29334	4.18215	4.22661	3.65724	4.29914	3.66569	4.40685	3.72458	3.9376	5.21097	3.43701	3.50655	2.49568	4.27681	4.18355	3.97301	4.03059	4.17408	4.376	4.3472	4.07776	4.10432	3.954	4.29624	3.94575	4.23941	4.3649	4.11596
YGR019W	-0.31516	-0.36319	-0.45587	-0.25706	-0.56912	-0.42294	-0.98042	-0.69979	-0.87229	-0.88456	-0.8394	-0.85157	-0.99147	-1.08555	-1.13153	-0.79069	-0.97392	-1.33125	-0.13032	-0.63691	-0.22126	-0.05719	-0.3006	-0.77633	0.05454	0.22802	-0.18889	0.20228	-0.90271	-0.8895	0.03362	-0.87147	-0.36804	0.10316	-0.45513	-0.80927	-0.1602	-0.15005	-0.15721	-0.43284	-0.52929	-0.44067	-0.94393	-0.52464	-0.65216	-0.95416	-0.08862	0.32327	-0.73068
YLR249W	6.78294	6.35145	6.87618	6.24522	6.70412	6.45923	6.44907	6.03772	6.55387	6.24485	6.64676	6.02376	6.49583	6.01415	6.39563	6.09526	6.3102	6.24811	6.55477	6.08831	6.56676	5.55217	6.58262	5.62503	5.74642	5.54379	6.34864	6.37956	6.16243	6.33268	6.83645	6.05739	6.0025	5.89653	6.54242	6.14712	5.92993	5.63356	6.71769	5.51559	6.67223	6.47473	6.38438	6.10855	6.85891	6.37249	6.663	6.41974	6.60835
YBR263W	3.42985	3.54199	3.4867	3.43018	3.29969	3.58996	3.57482	3.51952	3.75803	3.81221	3.86127	3.92741	3.80698	3.79729	3.81492	3.74011	3.80286	3.9382	3.55815	3.31419	3.5752	3.30631	3.54272	3.35546	3.17375	3.21834	3.47342	3.59546	3.30593	3.45102	4.27996	3.92839	3.61805	3.64315	3.78916	3.56638	3.40657	3.39803	3.44752	3.32427	3.63911	3.82787	3.38971	3.95558	3.74647	3.66092	4.017	3.68445	3.7819
YJL049W	-1.16669	-1.4197	-1.0118	-1.2836	-1.0806	-1.59139	-1.50268	-1.11587	-1.66215	-1.86909	-1.71105	-1.56828	-1.36548	-1.99501	-1.61466	-1.65275	-1.33455	-1.02999	-1.79952	-1.28006	-2.06909	-1.49926	-2.11349	-1.4823	-1.32751	-1.89971	-1.34244	-1.89565	-1.51637	-1.5746	-2.75816	-2.11112	-1.45101	-1.98927	-1.83548	-1.87435	-1.4526	-1.1061	-1.7609	-1.88615	-1.26809	-1.49731	-1.28192	-1.6849	-1.46686	-1.64998	-1.30088	-1.3078	-1.34244
YOR249C	-1.44804	-1.17561	-1.23156	-1.38071	-1.28101	-1.53406	-1.29395	-1.42884	-1.29301	-1.56712	-1.32796	-1.40779	-1.41939	-1.64128	-1.44305	-1.42633	-1.34392	-1.46737	-1.57341	-1.51174	-1.17658	-1.6718	-1.49436	-1.36569	-1.37268	-1.88739	-1.281	-1.88062	-1.30062	-1.29329	-1.72197	-1.55063	-1.00858	-1.47185	-1.30102	-1.5439	-1.36098	-1.5217	-1.58614	-1.54742	-1.38451	-1.34445	-1.34814	-1.37167	-1.34357	-1.35593	-1.28417	-1.34437	-1.0845
YBL097W	-0.39695	-0.52576	-0.33284	-0.42081	-0.41199	-0.52247	-0.55566	-0.57334	-0.65396	-0.7617	-0.65292	-0.61892	-0.83265	-1.06832	-1.06651	-0.9972	-0.82776	-0.85709	-0.79743	-0.42891	-0.65293	-0.42025	-1.03642	-0.58728	-0.49289	-0.57735	-0.50071	-0.47318	-0.39527	-0.47173	-1.40073	-0.61239	-0.93221	-0.91527	-0.40021	-0.54442	-0.68597	-0.3967	-0.98392	-0.90073	-0.22487	-0.36756	-0.18347	-0.49477	-0.12073	-0.55441	-0.32731	-0.42197	-0.50132
YCR020W-B	0.18514	0.34318	0.39408	0.51137	0.48309	0.3048	1.20994	1.30429	0.76705	1.05524	0.52495	0.66742	0.72363	0.79188	0.86834	0.15285	0.93175	0.70617	0.28193	0.55294	-0.16799	0.26057	-0.11878	0.01323	0.44043	-0.19593	0.28158	-0.58687	0.01743	-0.15992	-0.76989	-0.13465	0.34018	-1.1352	-0.16484	-0.06718	0.07508	0.12481	0.27495	0.07831	0.86016	0.61428	0.06049	-0.67279	0.30311	0.60541	0.2277	0.42307	0.42519
YDR286C	-1.58128	-0.88176	-1.15487	-1.34516	-1.50804	-1.16116	-1.8491	-1.27246	-1.70634	-1.34266	-1.70944	-1.33002	-0.67387	-0.15733	-0.58618	0.01192	-0.16469	-0.26322	-2.11441	-2.21652	-1.74016	-1.68735	-1.77135	-1.97349	-1.05589	-0.81631	-1.52371	-1.89286	-1.79061	-1.95769	-1.64959	-1.32933	-0.9934	-2.60526	-2.31175	-2.23926	-1.44903	-0.77492	-1.79887	-2.03692	-1.42897	-1.73944	-1.85035	-1.6712	-1.77759	-2.17508	-1.28224	-0.90356	-1.67971
YPR044C	-4.48814	-4.4604	-4.0627	-4.25225	-3.79188	-4.56497	-4.52937	-4.97596	-4.43521	-4.37786	-4.26401	-4.26895	-4.02545	-4.47931	-4.84956	-4.54989	-4.91762	-4.59947	-4.14042	-4.38124	-3.71824	-4.48292	-4.59714	-4.26154	-4.39608	-4.06833	-3.80917	-4.04822	-4.77068	-4.73294	-4.23066	-3.84179	-4.36181	-4.38263	-4.8295	-4.07781	-4.83143	-4.79949	-4.26617	-3.91973	-4.30737	-4.30473	-4.63826	-4.62243	-5.22186	-4.21879	-5.04857	-4.83205	-4.50207
YDR170W-A	4.30122	3.99349	4.31914	4.32077	4.25718	4.47803	-2.45547	-2.37549	-2.48463	-2.40645	-2.36809	-1.92843	-1.1727	-0.92137	-0.89358	-2.05147	-0.80193	-1.61607	4.51773	4.70093	4.24886	4.53786	3.89782	4.47723	4.34424	4.4573	4.75406	4.83082	4.41884	3.38284	1.54397	2.1557	4.19739	3.58237	3.31214	3.28705	3.96412	4.03053	4.20891	4.72463	3.65029	3.48087	3.8407	2.17643	3.76299	3.26392	2.94182	3.34815	-1.3935
YBL043W	-2.88373	-2.54644	-2.73973	-2.84556	-2.71618	-3.03538	-1.88191	-1.42538	-1.5975	-1.73206	-1.72905	-1.51088	-3.49871	-3.76413	-3.29573	-4.05309	-3.42247	-3.80348	-2.97663	-3.31925	-1.68838	-2.20685	-2.21011	-2.38214	-2.71247	-3.23912	-1.84555	-1.66838	-1.19209	-1.80174	-3.07256	-3.94767	-2.72718	-3.88161	-3.34838	-3.62241	-0.95475	-0.78039	-3.12534	-3.26179	-2.52105	-3.42351	-2.5071	-2.06661	-2.10463	-1.90901	-1.92791	-2.49147	-1.11869
YLR018C	1.26164	1.02509	1.18772	1.19802	1.01969	1.17316	1.03772	1.05427	1.1777	1.15741	1.36982	1.23711	1.28074	1.33701	1.57687	1.55525	1.39534	0.88051	1.19688	0.88529	1.24477	1.23042	1.03991	1.1917	1.16516	1.48114	1.34027	1.01703	1.19103	1.38828	0.5871	1.45281	1.42869	1.70089	1.35056	1.08985	1.39922	1.33024	1.125	1.26576	1.25459	1.3135	0.89089	1.60323	1.05802	1.33097	1.37333	0.93655	1.17974
YMR076C	0.0288	-0.05817	0.19861	-0.05587	0.04847	0.03411	-0.18735	-0.28687	0.00429	-0.44465	0.02314	-0.31968	-0.47476	-0.58455	-0.20322	-0.37516	-0.48743	-0.19231	-0.63091	-0.33963	-0.05584	-0.43122	-0.46357	-0.65061	0.36783	-0.48427	-0.13238	-0.31062	0.24669	0.14847	-0.78033	-0.8617	-0.78868	-0.97517	-0.30578	-0.48216	0.11372	-0.00496	-0.49181	-0.22984	-0.00917	0.11906	-0.14962	-0.24718	0.16983	0.07629	0.02168	-0.03581	-0.25325
YOR251C	0.68258	0.6604	0.75063	0.68293	0.58067	0.72243	0.95651	0.89938	0.75638	0.87027	0.86227	0.86272	0.79015	1.06645	1.03688	1.05671	1.23263	0.83505	0.86664	0.69275	0.94488	0.72526	0.93941	0.60209	0.57872	0.73122	0.84892	0.75541	0.95347	1.01318	1.52014	0.95021	0.65505	0.92747	0.97769	0.72786	0.96663	0.95317	0.78136	0.72896	0.69965	0.78215	0.77416	0.6547	0.69982	0.94203	0.91418	0.95022	0.80665
YAR070C	-3.07629	-3.25807	-2.47578	-2.3651	-2.9748	-2.49231	-3.19157	-3.76952	-3.16101	-3.83839	-3.78465	-3.69224	-3.98648	-4.26171	-4.20076	-3.65202	-3.58641	-3.651	-1.91427	-1.90546	-2.94683	-2.80813	-3.58055	-3.26313	-3.36071	-2.18128	-3.00028	-1.60444	-1.10517	-2.85571	-1.37232	-2.38233	-3.70757	-1.79048	-0.75704	-0.6893	-3.4962	-4.0252	-2.78117	-3.40366	-4.47105	-4.15197	-4.40829	-3.05637	-3.48263	-2.39413	-4.1885	-3.98647	-3.8148
YBR124W	-4.41323	-4.23107	-4.60033	-4.50188	-4.85942	-4.56225	-4.97616	-4.66708	-4.04358	-4.65021	-4.48206	-4.91039	-4.54698	-4.54522	-4.37686	-3.94604	-4.80611	-4.79053	-4.00667	-4.36903	-4.42372	-4.51125	-4.63608	-4.46006	-4.32523	-4.36812	-4.27223	-4.63002	-4.32513	-4.70544	-4.04652	-4.69353	-4.14207	-3.78106	-4.30933	-4.29927	-4.59374	-4.70456	-4.12341	-4.0931	-4.47893	-4.73929	-4.36223	-4.291	-4.59261	-4.06885	-4.98988	-4.58228	-4.05021
YJR135W-A	1.10527	0.84922	1.02176	0.756	0.8367	0.83209	1.13248	1.82596	1.25544	1.16648	1.16191	1.49861	2.13533	2.34654	2.13953	2.21629	2.6207	2.0589	1.64062	1.37162	1.51695	1.67876	1.73416	1.20461	0.45149	1.48697	1.10183	1.60823	1.2198	0.90332	1.79501	1.22325	0.97846	1.16794	0.88191	1.07558	1.25046	1.39977	1.24371	0.93746	1.16387	1.18052	1.13372	2.09815	1.06415	0.50158	1.65093	1.30244	1.39017
YOR186W	-3.87626	-4.53998	-3.65137	-3.62896	-3.811	-3.82807	-3.28879	-3.00716	-3.33503	-4.03048	-3.59365	-4.2871	-3.2861	-4.46056	-4.10376	-4.77195	-3.71443	-3.38049	-3.88084	-3.89538	-3.42557	-3.11901	-3.01983	-3.54252	-3.49339	-2.94705	-4.62594	-4.52437	-4.01491	-3.29699	-3.09846	-2.81308	-3.12509	-2.54947	-4.70466	-4.04493	-3.46139	-3.7293	-3.06227	-3.64998	-4.44236	-3.57922	-4.41585	-5.2153	-3.78252	-3.78173	-4.23214	-3.5178	-3.60648
YDR083W	1.63531	1.27	1.90728	1.47654	1.80778	1.57699	1.95806	2.17877	1.66607	1.57959	1.7928	1.87367	1.32868	1.29468	1.39104	1.13853	1.25237	1.45943	1.48601	1.69409	0.79545	0.86285	0.38272	1.92819	1.06422	0.44184	1.67567	1.21393	1.59467	1.57355	0.4753	1.3849	1.09005	0.56068	1.45528	1.60121	0.88367	1.12216	0.8697	1.66708	1.69789	1.39517	1.81813	0.79217	1.47512	1.70598	1.58269	1.50959	1.68605
YOR011W-A	-4.95152	-4.56846	-5.01015	-5.19535	-4.8264	-4.76448	-4.57075	-4.93149	-4.67733	-5.10567	-4.60832	-4.90551	-5.06268	-5.42527	-5.04316	-4.80058	-5.31171	-5.12354	-5.29862	-4.55778	-4.28568	-4.75609	-4.89794	-5.25027	-4.50335	-4.84439	-4.69441	-4.84266	-4.63355	-4.67893	-4.83962	-4.95147	-4.79692	-4.18724	-3.40895	-4.29225	-5.14253	-4.79256	-4.55592	-4.18384	-3.94097	-4.24881	-5.43687	-4.78607	-5.05666	-4.91593	-4.23236	-4.83223	-5.01308
YOR267C	1.43574	1.14627	1.31294	1.25145	1.30814	1.15385	1.6137	1.69591	1.34646	1.13359	1.35997	1.25662	1.33625	1.40914	1.39002	1.2736	1.57721	1.35313	1.3118	1.43753	1.32914	1.52558	1.61589	1.42104	1.70223	1.4293	1.21507	1.61979	1.19061	1.66441	1.08707	0.99573	0.86075	0.68192	1.37015	1.52922	1.05091	1.28451	1.38878	1.38378	1.6395	1.74374	1.9167	1.27721	1.40117	1.32351	1.14112	1.49843	1.22849
YLR109W	4.73011	5.77334	4.27682	5.9739	4.50187	5.94548	5.00828	5.83463	5.51706	5.53759	4.92925	5.70177	5.27766	5.93516	5.15832	5.57413	5.43597	5.69643	5.1796	5.43309	5.04974	5.59322	5.4031	4.9189	5.3132	6.00706	6.13674	6.43806	5.11334	5.8805	5.86306	6.24353	4.87854	5.50387	5.35283	5.64003	5.47854	5.87654	5.14295	4.98134	6.30828	6.16065	5.78114	6.12122	5.53839	6.19723	6.00271	6.32878	5.55844
YOR032C	-3.97527	-4.30136	-3.9299	-3.8964	-3.6905	-4.14488	-1.90516	-2.57123	-2.10858	-2.7063	-1.96404	-2.21127	-3.40231	-3.78388	-3.52499	-2.75736	-3.05755	-3.65407	-2.65632	-2.86507	-3.7489	-3.54618	-2.87216	-2.89616	-3.23599	-3.40584	-3.01406	-4.12954	-2.99764	-4.09019	-3.86217	-2.83436	-3.86861	-3.88161	-3.58325	-3.35497	-2.78411	-2.8154	-2.16357	-2.00139	-2.88	-1.9174	-4.3491	-4.26002	-2.38206	-3.70808	-2.82903	-1.7178	-3.01544
YOR091W	2.10478	1.78266	2.31988	2.14059	2.3882	1.82941	2.38533	2.52684	1.85094	2.30076	2.30308	2.4888	1.70798	1.80396	1.55526	1.71617	1.59212	1.78518	2.20583	2.26458	1.7065	1.72095	1.27096	2.53224	1.85587	1.37959	2.2214	1.83599	2.41032	2.41693	0.81991	2.53856	2.22083	2.26292	2.30917	2.35363	2.0011	2.06331	1.74927	2.50247	2.3744	2.04506	2.71686	2.17614	2.4475	2.30365	2.156	2.29195	2.38314
YKR059W	6.27121	5.88977	6.28314	5.14552	6.11795	5.52039	5.91979	5.76452	6.1533	5.73052	6.05612	5.86824	6.16882	5.78122	6.01791	5.67777	6.01877	6.04092	5.82674	5.46014	6.08986	5.2702	5.73567	5.39256	5.32932	5.29201	5.94265	6.07979	5.84305	5.96362	6.5504	5.60537	5.45922	5.00184	6.27047	5.67831	5.63433	5.31732	5.90186	5.17975	6.23459	6.19775	5.43928	5.77803	6.50154	6.05131	6.25468	6.13629	6.2581
YBR205W	1.60103	1.59701	1.74744	1.66845	1.65318	1.486	1.67221	1.25824	1.83064	1.69885	1.63133	1.50482	1.48963	1.86496	1.89824	1.3187	1.65165	1.23563	1.65967	1.61691	1.75485	1.65598	1.91076	1.45169	1.60784	1.69263	1.40087	1.3298	1.50649	1.64004	1.53883	0.62491	1.18135	-0.07409	1.69502	1.69541	1.72856	1.81463	1.89339	1.67904	1.56271	1.68847	1.56879	0.83597	1.38877	1.61357	1.58419	1.74661	1.74592
YLR316C	-0.67706	-0.42331	-0.49561	-0.47781	-0.29715	-0.76925	-0.25893	-0.272	-0.58747	-0.17172	-0.56535	-0.28918	-0.52156	-0.51308	-0.51076	-0.23882	-0.55139	-0.85753	-0.357	-0.45879	-0.80999	-0.78323	-0.66621	-0.24507	-0.69721	-0.7043	-0.55423	-0.96984	-0.59261	-1.04858	-0.84374	0.36467	0.08542	0.26161	-0.42463	-0.52222	-0.67896	-0.54852	-0.38987	-0.26422	-0.49623	-0.64592	-0.21217	-0.06814	-0.78973	-0.82868	-0.25278	-0.73179	-0.50211
YDR406W-A	-4.04116	-4.42982	-3.85207	-3.81738	-3.3715	-4.05735	-4.65283	-3.40679	-4.18957	-4.22917	-4.79365	-4.39207	-4.57324	-3.89108	-4.97857	-4.71083	-4.50744	-5.37939	-4.45624	-3.72097	-4.29264	-4.37614	-4.02307	-3.56279	-4.38275	-4.00112	-3.4875	-4.01023	-3.82053	-4.27687	-4.17969	-4.47196	-4.58038	-4.38263	-4.06034	-2.85763	-4.3693	-4.72558	-2.6391	-3.87875	-4.02881	-4.03493	-2.84697	-4.59069	-2.53691	-4.00557	-4.42907	-3.03017	-4.33803
YLR292C	1.58176	1.79653	1.75655	1.80488	1.53895	1.91596	1.71124	1.93595	2.09356	1.99412	1.79722	1.64444	1.78377	2.13393	2.08418	1.99132	2.04304	2.38332	1.76608	1.96802	1.9939	2.01574	1.5893	1.84321	2.02939	1.89627	1.81276	1.4124	2.01495	1.75955	1.1	1.29159	1.82902	0.45678	1.77888	1.94553	1.84202	2.02173	1.91729	2.006	1.64977	1.82956	1.67445	1.93692	1.89101	2.05032	1.80336	1.51659	1.99724
YLR216C	2.17114	2.23773	2.21269	2.33084	2.3579	2.4371	2.12113	2.18044	2.34677	2.28127	2.26487	2.19777	1.83979	1.89427	2.06996	2.27173	2.13871	2.05272	2.31353	2.26828	2.32933	2.13403	1.85749	1.94167	2.05351	1.89707	2.36735	2.17569	2.21345	1.40216	1.67146	1.50569	2.02732	0.66854	2.34055	2.47306	2.26357	2.0028	1.97821	2.30649	2.66874	2.66537	1.28998	2.1531	2.37055	1.87962	2.84249	2.50082	2.19456
YCR044C	1.02834	1.0689	0.62496	1.01454	1.00777	0.98641	0.88816	0.64921	1.0792	0.97529	1.01752	0.99465	1.42638	1.21803	1.06262	1.36177	1.20523	0.82532	1.25928	1.07884	0.938	1.00817	1.76661	0.92098	0.80732	1.47468	0.38618	1.5182	0.55956	0.60375	1.95391	0.43963	0.71181	0.26083	0.87763	0.82172	1.22891	0.84582	1.18111	0.69496	1.07647	0.98763	0.76059	0.8906	0.72268	0.65835	0.54962	0.98846	0.46742
YDR046C	2.1092	1.97857	1.77943	2.05392	1.88288	1.9984	2.49682	2.40552	2.65563	2.93253	2.63033	2.31506	2.41637	2.34138	2.13233	2.1393	2.14568	2.18994	2.35244	2.29558	2.41138	2.50709	2.44614	1.82482	1.95521	1.82137	2.29267	2.47619	2.15064	1.7254	3.02301	2.43817	2.31162	2.72478	2.46032	2.49174	2.55245	2.16711	2.1286	1.7452	2.59057	2.33564	2.32281	2.22213	2.56299	1.65265	2.32528	2.37061	2.05172
YGR069W	-4.41152	-4.17744	-4.31795	-4.32455	-4.84863	-3.0897	-4.59272	-4.66563	-4.43521	-3.54439	-5.40456	-5.07251	-4.23384	-4.57166	-3.56983	-4.27244	-4.60657	-4.19099	-3.17563	-4.22717	-3.71055	-4.09825	-3.88077	-3.90899	-4.77161	-3.6842	-3.18333	-4.47155	-4.56051	-3.86879	-3.40053	-5.18151	-4.88469	-4.66341	-4.48137	-4.15461	-3.1809	-4.2732	-3.88432	-4.25631	-3.70893	-4.43713	-4.01569	-4.77615	-3.28774	-4.66727	-3.50486	-4.04626	-4.41539
YJL092W	-0.0891	-0.09108	-0.03378	-0.17917	-0.08876	0.04522	-0.49821	-0.20678	-0.35325	-0.186	-0.34042	-0.37	-0.39584	-0.41423	-0.41708	-0.65986	-0.3441	-0.57228	-0.3328	-0.16824	-0.20284	0.18307	0.04366	-0.14998	0.22874	0.38794	-0.28609	-0.05125	0.02922	-0.21271	-0.15244	-0.65271	-0.45094	-0.45741	-0.45513	-0.29569	-0.1269	0.22089	0.06181	-0.03732	-0.20187	-0.24442	0.02094	-0.42333	-0.18168	-0.1987	-0.49067	-0.23594	-0.37868
YDR096W	-0.44234	-0.23943	-0.57273	-0.42129	-0.57318	-0.40579	-0.1599	-0.01775	0.23791	-0.18912	0.03622	-0.32559	0.02036	0.14354	0.0821	0.07633	0.19829	-0.2156	-0.22281	-0.3961	0.20731	0.44747	0.27587	-0.23385	-0.29837	-0.16028	0.06205	0.76023	-0.74906	-0.20948	0.29779	-0.6609	-0.64912	-0.80676	-0.45393	-0.32597	-0.06827	-0.05742	-0.34593	-0.6007	-0.12192	0.00284	-0.57655	-0.47956	0.12521	-0.5013	-0.21391	0.30686	-0.28776
YML018C	1.95874	1.62312	1.70044	1.44036	1.66053	1.72129	2.21629	1.80761	2.01604	2.27433	2.19253	2.12444	2.53848	2.40637	2.28366	2.06981	2.20048	2.31518	2.52576	2.09055	1.8867	1.86489	2.44277	2.21672	1.50071	1.73813	1.74025	2.34918	1.77653	1.55122	3.58056	2.43456	1.86735	1.7691	2.11793	2.36084	1.27559	1.11726	2.027	2.29514	1.7947	1.59593	1.8441	1.87476	1.83053	1.6152	1.9678	1.67369	1.73185
YLR445W	-4.40658	-4.17425	-4.55441	-4.48756	-4.19029	-4.52734	-4.9271	-4.52693	-4.57901	-4.57397	-4.68635	-4.73764	-4.45466	-4.51187	-4.49515	-4.53767	-4.42761	-4.66265	-4.14797	-4.25547	-3.99705	-4.46934	-4.39338	-4.62223	-4.56352	-4.81234	-4.38718	-4.51001	-4.55402	-4.26457	-4.3081	-4.09973	-4.02857	-4.39281	-4.425	-4.53954	-4.73418	-4.14807	-4.05326	-4.63661	-4.25802	-4.64007	-4.59331	-4.25832	-4.48224	-4.31625	-4.75731	-4.27682	-4.00046
YOR138C	-0.1969	-0.22862	-0.43601	-0.20526	-0.41351	-0.24817	-0.23714	-0.41462	-0.16162	-0.2173	-0.2975	-0.02404	-0.21092	-0.44873	-0.3791	-0.25059	-0.49827	-0.29981	-0.03013	-0.32557	0.11906	0.10747	0.19693	-0.06899	-0.02008	0.05262	-0.53071	-0.35584	0.01325	-0.64223	-0.03883	-0.47357	0.10307	0.14746	-0.25809	-0.42773	-0.39955	-0.26988	-0.1979	-0.22069	-0.09628	0.01899	-0.1095	0.20239	-0.49135	-0.62453	-0.13312	-0.38292	0.1911
YOR369C	6.44518	6.02061	6.48367	6.27448	6.22405	6.41813	6.49558	6.52283	6.48319	6.29899	6.30719	6.078	6.71855	6.38572	6.62038	6.19771	6.76774	6.49732	6.36196	5.9191	6.45396	5.67625	6.5645	5.84568	5.54212	5.89063	6.62	6.39243	6.60652	6.06012	6.58303	6.18425	5.82331	5.91737	6.62891	6.16038	5.80357	5.84092	6.48801	5.64496	6.51219	6.46523	6.21169	6.44592	6.64398	6.43892	6.60226	6.35506	6.58418
YGR246C	-0.27505	-0.41177	-0.28417	-0.26227	-0.22615	-0.28466	-0.65202	-0.2719	-0.59043	-0.50173	-0.47677	-0.41472	-0.46999	-0.53894	-0.63132	-0.65402	-0.60243	-0.18614	-0.5628	-0.60491	-0.98196	-0.72234	-1.13362	-0.47363	-0.59366	-0.50021	-0.5567	-0.74302	-0.35982	-0.52621	-1.23446	-0.38952	-0.60734	-0.36918	-0.67669	-0.61663	-0.65547	-0.55424	-0.57624	-0.65137	-0.53463	-0.54063	-0.28904	-0.30602	-0.56983	-0.57148	-0.23682	-0.59491	-0.56052
YJR145C	6.46998	6.05857	6.57833	6.35185	6.39389	6.36807	6.11727	6.02871	6.42812	6.04527	6.15704	5.85919	6.23415	5.99922	6.33616	6.17267	6.23444	6.23311	6.39342	5.96837	6.42674	5.24376	6.0562	5.77775	5.57166	5.64235	6.41912	6.2445	6.01225	6.01575	6.41044	6.15155	5.77749	6.23281	6.06922	6.16337	5.6938	5.61064	6.33018	5.54868	6.61577	6.20441	6.06656	6.25807	6.55622	6.21031	6.44567	6.4442	6.48017
YJR138W	-0.87707	-0.63811	-0.75575	-0.83984	-0.83523	-0.87777	-1.06117	-1.20826	-1.12852	-1.17971	-0.99419	-1.14912	-1.38146	-1.52693	-1.38742	-1.11128	-1.19519	-1.4597	-1.01872	-1.08122	-1.02314	-1.30295	-1.24989	-1.26943	-0.84379	-1.03715	-1.26794	-1.06527	-1.05517	-0.96801	-1.49162	-1.11781	-0.84768	-0.95614	-1.21892	-1.22513	-1.07603	-1.01403	-1.25572	-1.25567	-1.04395	-1.0001	-0.89925	-0.95341	-1.0228	-1.04281	-0.73772	-0.70661	-0.94814
YHR059W	0.14711	-0.71509	-0.28018	-0.55547	-0.62865	-0.53743	0.60595	0.33083	0.62269	0.26973	0.11235	0.54178	0.5254	0.84289	0.5597	0.88031	1.03112	0.53805	0.01142	-0.08147	0.04786	0.01701	0.20544	0.16857	-0.42938	-0.61548	0.15592	-0.22851	-0.02858	-0.41324	-0.21214	0.44689	-0.18225	-0.92631	-0.0248	0.01669	-0.12113	0.01673	-0.08287	0.21685	-0.09628	-0.04982	-0.132	-0.42333	-0.34676	-0.21183	0.15709	0.21617	0.35466
YLR138W	1.76162	1.17255	1.30513	1.44774	1.51308	1.33004	1.47822	1.64076	1.01142	1.25827	1.22538	1.48687	1.25922	1.07104	0.98263	0.95366	1.00882	1.00666	1.71247	1.68896	1.33995	1.62436	1.68678	1.46999	1.50233	1.81778	0.98711	1.53591	1.59362	1.38917	1.48548	1.26535	0.97534	0.84065	1.39861	1.48069	1.58606	1.45455	1.68139	1.44565	1.65236	1.52602	1.7856	1.01233	1.37952	1.02116	1.13192	1.60405	0.76753
YHL009W-B	-1.81251	-2.42412	-1.78429	-2.03251	-1.56049	-2.47823	-4.6347	-4.76834	-4.69704	-4.90754	-4.56748	-4.82321	-2.088	-2.50774	-2.03617	-1.99798	-1.95534	-2.0658	-2.97663	-2.94233	-2.6995	-2.96778	-2.84129	-2.49877	-2.99515	-3.785	-2.97859	-3.58378	-3.25963	-4.41298	-3.33595	-3.40063	-2.33343	-3.10772	-2.96203	-3.27282	-2.41464	-2.62213	-2.31347	-2.34813	-3.13449	-3.19516	-1.77729	-2.7369	-2.39319	-4.62857	-3.5736	-3.15406	-2.42677
YNL156C	0.42634	0.69762	0.57504	0.67768	0.42832	0.71553	1.07393	0.78482	0.98894	1.24531	1.04486	1.00711	1.37695	1.27476	1.47115	1.46739	1.29392	1.46655	0.34837	0.68177	1.13424	1.16703	0.68467	-0.1154	0.41539	0.58599	0.89403	1.0984	0.75972	1.02272	0.63908	0.82633	0.13205	0.70055	0.3336	0.43256	0.57653	0.26419	0.36248	0.09184	0.67958	0.58988	1.0743	1.23858	0.76757	1.04522	0.49088	0.91492	1.27611
YNL106C	-0.56868	-0.39599	-0.51963	-0.58896	-0.61145	-0.4655	-0.8537	-0.9963	-0.66899	-0.92973	-0.75321	-0.9294	-1.09522	-1.09902	-1.03331	-1.0087	-1.00321	-1.03971	-0.45474	-0.55749	-0.38165	-0.66306	-0.72621	-1.01067	-0.79204	-0.88861	-1.02109	-0.68896	-0.54431	-0.49281	-0.8004	-0.88231	-0.63175	-0.7218	-0.55892	-0.72778	-0.71585	-0.80199	-0.37373	-0.75395	-0.71573	-0.48464	-0.85882	-0.56228	-0.62797	-0.75069	-0.82482	-0.73917	-0.71938
YNL286W	-1.0749	-0.82694	-0.84828	-1.02647	-0.51321	-1.23206	-0.91247	-0.96066	-1.12459	-1.02836	-1.11797	-1.08766	-0.77141	-1.05282	-1.02332	-0.78417	-0.75271	-0.85271	-1.0882	-1.03989	-1.34916	-1.05378	-1.8178	-0.67327	-1.1953	-1.56086	-0.73077	-1.30196	-1.19427	-1.34052	-2.25254	-0.80866	-1.24876	0.09551	-0.87124	-1.10618	-1.36557	-1.17148	-1.25613	-1.13041	-1.06988	-1.45086	-0.97448	-1.21183	-1.13159	-0.89534	-1.10574	-1.05451	-0.75155
YNL093W	-3.94896	-4.20103	-4.1865	-4.22612	-4.41094	-4.25735	-4.49098	-4.42572	-4.14642	-4.67818	-4.17439	-4.50035	-4.6959	-4.51553	-4.59105	-4.57016	-4.57479	-4.84188	-4.28694	-4.09792	-4.06018	-4.23335	-4.31249	-4.20158	-4.14735	-4.26171	-4.01134	-4.41979	-4.45349	-4.04281	-4.16991	-4.42839	-4.53037	-4.70114	-4.32592	-4.0536	-3.8152	-4.08562	-4.25408	-4.36323	-3.99972	-4.12764	-4.30075	-4.46095	-4.10436	-4.21879	-3.96588	-4.23103	-4.05058
YIL040W	1.38733	1.08611	1.08145	1.46779	1.36614	1.60849	1.1831	1.24648	1.23035	1.36994	1.23653	1.33562	1.85996	2.00286	1.82197	1.86452	1.91093	2.25896	1.89204	1.69664	1.68099	1.7857	1.90878	1.76854	1.28714	1.59982	1.67754	1.72143	1.59006	1.27657	2.48613	0.93847	0.92039	0.38019	1.52226	1.64304	1.52793	1.95161	1.48604	1.38618	1.70134	1.63885	1.22927	1.07226	1.50767	1.09069	1.47614	1.65752	1.38572
YKL104C	2.27473	2.49272	2.4394	2.36465	2.25511	2.41605	2.57538	2.68899	2.78181	2.61607	2.82495	2.77094	2.33974	2.46696	2.34213	2.45113	2.42049	2.18202	2.98927	2.96282	3.02421	3.09513	2.87818	2.48886	2.70557	3.13059	2.33767	2.61645	2.5425	2.34721	2.75561	2.02601	2.26343	1.96371	2.91044	2.84121	2.51457	2.73097	3.01501	2.93551	2.52417	2.63224	2.57825	2.5555	2.80414	2.55404	2.55478	2.74009	2.77425
YLR186W	2.32698	2.27572	2.49284	2.1477	2.30593	2.22665	2.53839	2.61908	2.79055	2.68962	2.88246	2.6431	2.92717	3.03185	2.85784	2.48679	3.00802	2.74601	2.53591	2.38374	2.41079	2.32158	2.46365	2.74659	2.18672	2.0817	2.44586	2.35336	2.54467	2.26561	2.50895	2.54913	2.81676	2.19786	2.64707	2.78092	2.35361	2.1585	2.55017	2.58167	2.34069	2.62228	2.16718	2.50607	2.23767	2.66113	2.27041	2.29734	2.62215
YGL134W	-0.84606	-0.51051	-0.81787	-0.63245	-0.69476	-0.60763	-0.78867	-0.72975	-0.53886	-0.65777	-0.57816	-0.67465	-0.80068	-0.89617	-0.71116	-0.60771	-0.52298	-0.64553	-1.32697	-1.21182	-0.90391	-1.05593	-1.13336	-1.1828	-0.56569	-0.66178	-0.70067	-1.10146	-0.88865	-0.84956	-0.96111	-0.79666	-0.71317	-1.25377	-0.77485	-0.97366	-0.76634	-0.58685	-0.86698	-1.11302	-0.8126	-0.83739	-0.64234	-0.82323	-0.75614	-0.84314	-0.62973	-0.92243	-0.50054
YDR425W	-0.87703	-0.79704	-0.76428	-0.90103	-1.03322	-1.16068	-1.19403	-1.1476	-1.09488	-1.45742	-1.21202	-1.45334	-1.27624	-1.4409	-1.44535	-1.24366	-1.05032	-1.15718	-1.35985	-1.05584	-0.81777	-1.20448	-1.17175	-1.50888	-0.88398	-1.15743	-0.8886	-0.94956	-1.15068	-0.7051	-1.05168	-1.2722	-0.96617	-1.43844	-0.75985	-0.85575	-0.8837	-1.12049	-1.07016	-1.32584	-0.8682	-0.79725	-0.91765	-1.13122	-0.89044	-1.07216	-0.83903	-0.92487	-0.95282
YJR094W-A	5.83655	5.46968	5.9838	4.77878	5.12759	5.17895	5.42727	5.62489	5.80268	5.52455	5.57195	5.16806	5.7584	5.64484	5.90077	5.60124	6.0022	6.11916	5.22248	5.19719	5.24672	5.0297	5.27269	5.13395	4.84724	5.03201	5.33817	5.60501	4.88371	5.19634	6.04386	5.47049	5.0489	4.88116	5.31218	5.23307	4.9485	5.19106	5.27224	4.83259	5.68034	5.68343	4.97807	5.48083	5.99191	5.54034	5.92601	5.77433	5.927
YDR293C	2.19542	2.22091	2.28444	2.25019	2.12772	2.28579	2.279	2.29846	2.34563	2.24727	2.44161	2.34916	2.05419	2.06981	2.04191	2.03052	2.07591	1.90021	2.33128	2.32679	2.33525	2.46929	2.55256	2.26793	2.26989	2.40469	1.91612	2.50459	2.31521	2.38225	2.70347	1.99139	1.73631	1.95236	2.71718	2.62427	2.23984	2.11755	2.36054	2.37973	2.41317	2.48239	2.35048	2.35813	2.32771	2.10969	2.22715	2.5689	2.07166
YBL113W-A	-1.05361	-0.7956	-1.27791	-0.83571	-0.96169	-0.75986	-1.29687	-0.98991	-1.2219	-1.15959	-1.14853	-1.0751	-2.7635	-3.0871	-2.80343	-2.41508	-2.8957	-3.21752	-0.53077	-0.97393	-1.96711	-1.89071	0.04606	-1.71679	-1.57109	0.24627	-1.50287	0.02723	-0.77294	-1.14611	0.28313	-0.18141	-1.31887	-0.68808	-1.70692	-1.52364	-2.12481	-1.98277	-1.50677	-2.96606	-1.09441	-1.10473	-0.61803	2e-05	-1.50969	-0.75421	-2.04999	-1.89181	-1.58343
YNR015W	0.9532	0.81256	1.1166	1.1467	0.87897	1.0955	1.43086	1.70469	1.47482	1.45357	1.5178	1.78022	1.83803	1.80548	1.85676	1.75862	1.83035	1.88676	1.32338	1.21541	1.38238	0.93288	1.45923	1.65005	1.01747	0.99265	1.32525	0.84345	1.67392	1.47602	1.36197	1.88876	1.48073	1.83877	1.38029	1.40352	1.57084	1.18806	1.60097	1.48077	1.36857	1.15738	1.40058	1.85233	1.2094	1.46385	1.33216	1.04381	1.62057
YKL006W	6.68865	6.41143	6.66495	6.55432	6.60149	6.5722	6.64782	6.5204	6.73568	6.49702	6.57744	6.1851	6.72472	6.3927	6.40235	6.0517	6.46366	6.3899	6.48213	6.61849	6.47602	6.28269	6.60002	6.03636	5.68184	6.18777	6.496	6.62684	6.8079	6.09679	6.82051	6.22624	5.6109	5.81363	6.73821	6.52854	6.19262	5.98078	6.47865	5.55388	6.79319	6.50685	6.83601	6.03753	6.80404	6.44081	6.47062	6.60192	6.75818
YLR456W	-1.88691	-1.43176	-1.62692	-1.6468	-1.89779	-2.23183	-1.58892	-1.27102	-1.28983	-1.61153	-1.38263	-1.26695	-1.73852	-1.73076	-1.50496	-1.33629	-1.54381	-1.59477	-1.50969	-1.73577	-1.31751	-1.55098	-1.9696	-1.56555	-1.41913	-1.78197	-1.68857	-2.17497	-1.63706	-1.49324	-2.12165	-1.90346	-1.28025	-1.07455	-1.73834	-1.75775	-1.45618	-1.56555	-1.37894	-1.53701	-1.72416	-1.87725	-1.55101	-1.62026	-1.51002	-1.56731	-1.69353	-1.74417	-1.40933
YDR448W	-0.08994	0.13494	0.09407	0.03642	0.01962	-0.15031	-0.32574	-0.02997	-0.18652	-0.34832	-0.20008	-0.05162	-0.25039	-0.09149	-0.26229	-0.15866	-0.19334	-0.41939	-0.12187	0.1006	0.09192	0.40125	-0.14551	0.02301	0.21868	0.46692	0.05802	-0.34028	0.38466	0.06118	-0.7339	0.14722	0.09561	0.58909	-0.33174	-0.30085	0.20049	0.42138	-0.03105	0.03764	-0.10604	-0.133	0.04433	0.34442	0.03217	0.04217	-0.0438	-0.05972	0.14004
YIL166C	-3.14183	-2.9154	-3.14541	-3.14257	-3.00164	-3.5049	-2.36794	-2.39222	-2.24004	-2.67073	-2.33121	-2.44762	-3.06901	-3.50733	-3.4685	-3.16699	-3.48292	-3.51495	-2.993	-3.36227	-2.91619	-3.13325	-1.64091	-2.15485	-1.97266	-2.22235	-2.04123	-2.2409	-2.04533	-2.89303	-1.76328	-2.98784	-1.91773	-2.89861	-2.60525	-2.94986	-1.61056	-1.99482	-2.92766	-3.2728	-3.11597	-3.14552	-1.99605	-1.87819	-2.3178	-3.13698	-2.70728	-2.18621	-2.43344
YDR097C	-0.09962	0.34607	0.18726	0.19173	0.24844	0.28374	-0.1256	-0.17182	0.10438	0.00639	0.04818	-0.03697	-0.28383	-0.38757	-0.14729	-0.12285	-0.20157	-0.18164	-0.24878	0.02821	0.01345	-0.30534	-0.57522	-0.24187	0.32349	-0.45813	0.0118	-0.33323	0.20686	0.11112	-0.62367	-0.04667	0.06968	-0.10679	-0.22301	-0.22434	-0.02569	-0.02494	-0.42015	-0.05198	0.04871	0.06292	0.32226	0.14695	0.0847	0.14598	0.06344	-0.06408	0.29208
YER184C	-2.29191	-1.87836	-1.92995	-1.9801	-1.84466	-2.03638	-2.35103	-2.62757	-2.17154	-2.36013	-2.23226	-2.3971	-2.01611	-2.47896	-2.13092	-1.61961	-2.12405	-2.49583	-2.07791	-1.94824	-2.17432	-2.47133	-1.98231	-2.36547	-2.28587	-2.65367	-2.07059	-2.42393	-2.4583	-2.17623	-2.0159	-2.48828	-2.17119	-1.881	-2.11399	-2.6221	-2.04121	-2.37928	-2.01308	-2.39182	-2.40787	-2.35276	-2.17591	-2.2299	-2.02699	-2.21141	-2.5682	-2.26671	-1.90338
YJL047C-A	4.13396	3.2666	4.1734	4.15118	4.29201	3.7601	4.72796	3.78054	4.13275	4.60258	4.44036	3.75528	4.26246	4.32259	4.40863	3.14233	2.57565	2.53573	4.79568	3.45509	4.70063	3.76101	4.82694	4.66254	3.59485	3.40762	4.18422	5.11608	2.69627	2.90705	4.07773	2.70711	3.37795	2.93487	4.28843	4.55589	3.58591	2.8789	3.2824	4.13623	3.84315	4.63478	4.31156	2.45042	3.15213	3.98262	2.07218	3.12551	4.27502
YJL066C	-0.63825	-0.31349	-0.58815	-0.43509	-0.59814	-0.70404	-0.48979	0.06468	-0.23319	-0.25827	-0.36615	-0.40245	-0.02124	0.53133	0.1183	-0.03081	-0.16511	-0.28933	-0.233	-1.00373	0.13166	0.0544	-0.04104	-0.00964	-0.28279	-0.19182	-0.14108	0.04732	-1.05732	-0.42345	-0.07007	0.03754	-0.01984	0.19402	-0.65872	-0.51344	-0.15061	0.08623	-0.20999	-0.27645	-0.07425	-0.09482	-0.18649	0.09974	-0.25316	-0.31741	-0.16395	0.00652	-0.23523
YLR368W	-1.057	-0.68205	-0.9616	-0.98245	-0.94875	-0.96719	-0.89132	-0.83965	-0.6123	-0.77496	-0.53733	-0.79181	-0.88956	-1.15006	-1.02114	-1.01591	-0.87901	-0.68529	-0.9866	-0.99655	-0.78561	-1.27028	-1.02126	-0.89911	-0.82308	-1.35624	-1.11717	-1.32357	-0.95328	-0.63364	-0.7519	-2.00216	-0.89185	-1.53283	-0.98428	-1.22756	-1.02757	-1.13529	-0.93538	-0.69021	-1.0301	-0.88434	-1.16744	-0.96482	-0.96853	-0.95047	-0.9787	-1.23322	-0.89072
YOR194C	1.20454	0.71826	1.2541	1.12802	1.21533	0.96514	1.29595	1.81386	0.93937	1.38865	1.32417	1.399	1.04318	0.83844	1.02361	1.04287	1.06794	1.54088	0.82594	1.37419	0.37306	0.98226	0.2631	1.39179	1.50992	0.72092	1.19304	0.77931	1.22035	1.5702	-0.24826	1.32662	0.79442	0.5202	0.90892	1.11639	0.95189	1.02045	0.85638	1.17482	1.46365	0.97711	1.29269	0.21343	1.07576	1.155	1.31191	1.54568	1.38587
YKL095W	-1.18488	-1.23237	-1.12476	-1.13586	-1.05474	-1.21061	-0.84747	-0.67189	-1.16256	-1.08276	-1.09984	-0.5888	-1.5496	-1.70329	-1.64474	-1.46759	-1.67449	-1.4803	-0.93346	-0.80281	-1.18425	-1.04839	-1.11009	-0.72827	-0.86935	-0.99615	-0.70072	-1.14393	-0.64225	-0.62244	-1.90165	-0.5295	-0.91315	-0.99204	-0.97378	-1.18833	-0.69306	-0.51585	-0.83836	-0.94922	-0.63399	-1.07926	-0.49249	-1.17188	-1.13748	-0.88936	-1.22745	-0.78481	-0.98667
YGR060W	4.23371	4.26621	4.22971	4.11498	4.013	4.20844	5.16625	4.96517	5.39116	5.38989	5.5125	5.13258	5.46349	5.21468	5.32544	5.08885	5.51911	5.35217	4.54791	4.44576	4.63802	4.65574	4.54229	4.3028	4.68551	4.6008	5.03819	5.28704	4.60471	5.46232	5.57188	4.50682	4.27938	4.21385	4.30267	4.44576	4.29598	4.43198	4.71195	4.22322	4.75924	4.79533	4.73684	4.81975	6.06596	5.54449	5.02888	4.89334	4.97802
YIR044C	0.62193	0.18577	0.0533	0.45891	0.28262	0.35468	-2.27027	-2.1654	-2.35334	-2.23994	-1.92624	-3.40252	-0.64323	-0.62973	-0.81453	-0.90177	-0.8873	-1.39893	-2.11594	-1.75174	-4.24167	-3.19512	0.25223	0.03228	-2.36846	-1.46356	-2.26827	-2.12961	-2.80933	-2.50854	0.13151	-1.26576	-1.58633	-0.33195	-1.07513	0.02185	-1.2668	-1.10273	-0.00334	0.11439	-3.06671	-3.48947	-2.83981	-2.74897	0.18501	-2.40819	-3.32737	-1.76117	-3.18697
YHR041C	1.66954	1.56484	1.4703	1.36054	1.23637	1.35579	1.60097	1.3166	1.14054	1.47781	1.13243	1.61217	1.78082	2.04566	1.71156	1.2483	1.79914	1.80667	1.95407	1.63654	1.59775	2.05776	2.38717	1.42365	1.33726	2.1188	1.517	2.47672	1.38244	1.25762	2.41981	1.7289	1.59022	1.98505	1.55541	1.71799	1.32324	1.63284	1.83752	1.64522	1.6093	1.56317	1.46114	1.74818	1.17905	1.27524	1.53079	1.61028	1.13584
YBR115C	2.12807	2.13268	2.10886	2.13285	2.00522	2.25545	2.04981	2.15273	2.51257	2.58192	2.33635	2.36901	2.11234	1.92848	1.97689	1.46891	1.80934	1.73588	1.8347	1.69557	1.28527	0.70237	1.10163	0.93264	2.16049	1.44406	1.19	1.32507	1.75694	1.82112	2.97011	1.67127	1.44179	1.29484	2.00081	1.65862	1.20976	1.07443	1.2913	1.50324	1.49269	1.54775	1.80576	1.49375	1.52746	1.85032	1.38923	1.96398	1.7912
YCR097W	0.18257	-0.92824	0.30718	-0.06299	0.31246	-0.05118	-0.34047	0.66536	-0.34738	-0.88889	-0.56897	-0.68764	0.07173	0.06444	-0.22844	-1.39376	0.09859	-0.16412	1.00767	1.58612	-4.25893	-5.27311	-0.02721	1.76242	0.73769	1.0704	0.20939	-0.591	1.91764	-0.64744	-0.85413	-1.61224	-4.74798	-4.77754	0.05771	0.17423	0.69818	1.60354	-4.25408	-4.47915	-0.1822	-0.383	0.13107	-1.35918	0.47498	0.17583	-1.01855	0.32702	-0.09138
YBR147W	-3.38656	-3.39854	-3.30496	-3.22392	-3.15668	-3.55535	-2.8216	-2.57507	-2.51778	-3.08443	-3.12675	-3.40557	-3.27528	-3.29016	-3.61842	-3.58754	-3.63972	-3.83768	-3.153	-3.18373	-3.61344	-3.6195	-3.45715	-4.12062	-2.35056	-2.94009	-3.18129	-3.5213	-3.44749	-3.06217	-0.74912	-3.64247	-4.32315	-4.19597	-3.63218	-3.91989	-3.79151	-3.36888	-3.51106	-3.88536	-3.16691	-3.21664	-3.99652	-4.95268	-3.30877	-3.51786	-3.88808	-1.99448	-3.50035
YFL003C	-3.84598	-3.82715	-3.85443	-3.97888	-3.66478	-3.96156	-3.98888	-3.88969	-3.98215	-4.27928	-4.00991	-4.26811	-4.1625	-4.42417	-4.28383	-4.72154	-4.22983	-4.33343	-3.82193	-3.84533	-3.83663	-4.14337	-3.72421	-3.8651	-3.67405	-4.02567	-4.01596	-3.9141	-3.58987	-3.56359	-3.9493	-3.93642	-4.18819	-4.03733	-4.13601	-4.20404	-3.62934	-4.03808	-3.66678	-3.62612	-3.89663	-4.01264	-3.82717	-4.42809	-3.83476	-3.58904	-3.96588	-3.59151	-3.24205
YHR086W	0.43459	0.2449	0.16518	0.16387	0.29562	0.23957	0.56873	0.13238	0.31297	0.47339	0.51434	0.48722	0.97649	0.84433	0.60166	0.86454	0.73651	0.37673	0.27865	0.18559	0.49145	0.62054	0.96955	0.05305	0.23909	0.42647	0.47701	1.14106	-0.09512	0.38215	1.46589	0.53615	0.00737	0.46397	0.39547	0.38471	0.27508	0.04009	0.49051	0.23919	0.28744	0.29862	0.42189	0.63877	0.41783	0.25437	0.3276	0.50737	0.36621
YOL120C	6.91701	6.33446	6.72885	6.00954	6.64873	6.41415	6.58397	6.3699	6.48398	6.3689	6.55019	6.18427	6.71065	6.45954	6.66264	6.19258	6.6794	6.36683	6.75212	6.39604	6.82768	6.03018	6.64607	5.95562	5.90514	6.03608	6.64479	6.59491	6.93488	6.3124	6.94008	6.29643	5.91768	6.15786	6.76152	6.44	6.02691	5.93715	6.50431	5.60074	6.82097	6.58401	6.66043	6.18802	6.71343	6.39998	6.57243	6.63524	6.76819
YML079W	1.54339	1.77351	1.66097	1.57287	1.36421	1.56437	1.35199	1.54974	1.15079	1.09887	1.12145	1.00805	1.0618	1.42845	1.13006	0.98764	1.27041	1.41717	1.4491	1.50884	1.57387	1.64962	1.01246	0.97929	1.44647	1.37694	1.49811	1.59848	1.69127	1.07486	1.17023	1.19824	1.2364	0.76016	1.52368	1.68566	1.05948	1.37499	1.15675	1.02934	1.23812	1.14127	1.03723	1.23918	1.21664	1.18167	1.46928	1.32519	1.804
YOR125C	-0.71812	-0.38896	-0.50176	-0.44736	-0.61934	-0.3809	-0.41785	-0.40317	-0.24128	-0.17721	-0.23287	-0.12064	-0.60817	-0.30951	-0.30942	-0.41963	-0.44636	-0.45447	-0.11032	-0.34478	-0.57953	-0.10003	0.04277	-0.18864	-0.06654	-0.10001	-0.25335	-0.17143	-0.50411	-1.21598	-0.50465	-0.20434	0.164	0.41415	-0.70113	-0.80058	-0.25525	-0.24185	-0.23873	-0.34053	-0.04773	0.06829	-0.99556	-0.79767	-0.85728	-0.93448	-0.2326	-0.30989	-0.33869
YLR065C	1.91949	2.01979	2.07211	2.08257	1.63574	2.16408	2.2165	2.33832	2.08145	2.31647	2.26612	2.17059	2.2235	2.17094	2.18567	2.24977	1.82476	2.65429	2.02622	1.96465	1.98836	2.15571	1.89915	2.22697	2.11898	2.47651	2.12674	1.94665	2.34837	2.12709	1.96846	2.1494	2.30919	2.28384	2.12295	2.06899	2.51296	2.48459	2.37835	1.90448	2.16546	2.30138	1.96624	2.07666	2.03136	2.3781	2.04921	2.08044	1.94476
YNL298W	0.1847	0.34997	0.08717	0.11344	0.064	0.20158	0.55402	0.70674	0.66871	0.94351	0.78081	0.774	0.26743	0.44984	0.22224	0.15831	0.4374	0.13921	0.34002	0.4617	0.74891	0.49188	0.39386	0.41085	0.73707	0.66858	0.22972	0.41011	0.53476	0.6998	0.4098	0.72101	0.8304	0.61384	0.65996	0.61636	0.55544	0.56978	0.56889	0.63429	0.58297	0.40323	0.81704	0.51635	0.30775	0.77337	0.42409	0.32067	0.28122
YPL134C	-0.15468	-0.06861	-0.37486	0.1117	-0.19663	-0.3703	-0.33544	-0.73873	-0.77981	-0.56405	-0.5123	-0.411	-0.74922	-0.88637	-0.87854	-0.65604	-1.01246	-1.07264	-0.56542	-1.07331	0.00657	-0.23036	-0.2197	-0.98463	-1.09236	-0.98524	0.00504	0.15782	-0.86707	0.42393	0.52494	0.02808	-0.31518	-0.02817	-0.46171	-0.71257	-0.17833	-0.28714	-0.2045	-0.31797	-0.85056	-0.75632	-0.7668	0.2005	-0.25347	0.59097	-0.53046	-0.18281	-0.33419
YER078C	-0.15774	0.18336	-0.04603	0.33437	0.14395	0.18027	0.2031	0.0907	0.33929	0.49319	0.42032	0.31264	0.22175	0.17942	0.21857	0.50647	0.3841	0.02105	-0.0038	-0.15258	0.07784	-0.18803	0.13114	-0.05414	-0.071	-0.06059	-0.03308	-0.11999	0.1851	-0.12874	0.4753	0.57959	0.51022	0.46829	0.08258	-0.04039	0.10761	0.05123	0.2995	-0.19804	-0.02907	0.04817	-0.04405	0.34442	0.14077	0.29231	0.12398	0.00904	0.26502
YGL225W	3.53799	3.37096	3.07952	3.35181	3.26942	3.23224	3.43906	3.0567	3.19137	3.61071	3.32252	2.98438	4.24562	4.04618	4.03449	4.30785	4.22731	4.20686	3.23611	3.21975	3.51558	3.56174	3.72686	3.16497	3.14894	3.68137	3.28256	3.82127	3.21292	2.95902	4.23792	3.30662	3.16454	3.8726	3.02453	3.01805	3.42361	3.18071	3.25915	3.1435	3.52823	3.52664	3.20681	3.01554	3.55718	3.31177	3.89853	3.86185	3.19432
YLR129W	1.20649	1.21689	1.28819	1.31793	1.46184	1.33857	1.63964	1.30676	1.57768	1.74824	1.68331	1.81179	1.20451	1.12593	1.46324	1.16897	1.48252	1.46452	1.10451	1.35494	1.10718	0.85135	0.99006	1.48687	1.19702	0.58999	1.18994	0.9932	1.41991	1.46786	1.10331	1.40755	1.25353	1.0221	1.43599	1.53213	0.91002	0.93822	1.42413	1.6552	1.44807	1.41005	1.35171	0.88345	1.44906	1.5256	1.43936	1.20279	1.27624
YNL224C	-0.576	-0.58221	-0.2388	-0.47024	-0.2549	-0.56716	-0.86098	-0.41462	-0.90706	-1.08639	-0.79434	-0.74279	-1.35545	-1.43716	-1.28438	-0.94323	-1.30534	-1.21301	-0.80067	-0.51392	-1.0726	-0.89281	-1.29956	-0.80488	-0.69793	-1.07967	-0.5806	-0.8184	-0.29181	-0.7594	-1.56333	-0.44604	-0.69881	-0.27	-0.35895	-0.47412	-0.8071	-0.49083	-1.13718	-1.10726	-0.53762	-0.63667	-0.6098	-0.66156	-0.55192	-0.55101	-0.38543	-0.61519	-0.65218
YNL122C	-0.39911	-0.09815	-0.13667	-0.25215	-0.18398	-0.08353	0.0624	0.24213	-0.24845	0.42389	-0.32163	-0.59138	0.36113	0.24172	0.40253	-0.15442	-0.01691	0.1692	-1.15238	-0.69584	0.00568	-0.53497	-0.77403	-0.06899	-1.47015	-1.13218	-0.68667	-0.4654	-0.47126	-0.58088	-1.27807	-0.5665	-1.92109	-1.72355	-1.1938	-0.75209	-1.61197	-1.24898	-0.06377	0.14749	0.10556	-0.05957	-0.47817	-0.85897	0.2069	-0.5855	-1.0149	-0.42584	-0.0669
YGL066W	-0.40591	-0.61083	-0.09635	-0.35292	-0.15657	-0.60407	0.16319	0.45481	-0.06188	0.11064	0.10098	0.23743	-0.71645	-0.41156	-0.80731	-0.59713	-0.45711	-0.52904	-0.26698	-0.04046	-0.3248	-0.12525	-1.04141	-0.33488	-0.32663	-0.64845	-0.00286	-0.28491	0.41908	-0.13853	-1.01483	-0.06601	0.20027	0.49314	-0.03497	0.04366	0.36066	0.37192	-0.48441	-0.47386	0.05287	-0.36535	0.5923	0.0337	0.04944	-0.02438	0.19516	0.09937	0.20688
YNL217W	1.65417	1.47555	1.67997	1.62877	1.67012	1.70782	1.43419	1.67156	1.76719	1.4435	1.58278	1.46367	1.36741	1.61266	1.63302	1.66697	1.64728	1.67847	1.49771	1.79186	2.04976	2.12275	1.10513	1.58898	1.10635	1.20881	2.04911	1.58236	2.48527	1.63268	1.15812	2.00959	2.25344	2.24483	2.25619	2.34729	1.77454	2.13179	1.23147	1.0562	1.11048	1.40416	1.21818	1.07756	1.14643	1.66873	0.44702	-0.41813	1.8252
YCL067C	-0.2494	-0.4627	0.15719	-0.13207	-0.00113	-0.28483	-0.19257	0.09538	-0.45395	-0.05848	-0.65922	-0.49462	-0.16082	-0.6978	-0.70163	-0.52458	-0.46989	-0.00582	-0.02074	0.22711	1.25054	1.50396	-1.27816	-0.38453	0.25264	-0.23661	-0.08019	-0.98553	-0.51692	-0.3147	-1.33377	-0.43399	0.9331	0.59241	-0.58441	-0.00708	0.03712	0.2363	1.05603	1.44836	-0.04362	-0.1786	-0.30086	-0.92164	-0.21724	-0.07818	-0.0668	0.29184	-0.15623
YGL063W	-0.28552	-0.32571	-0.55655	-0.63474	-0.56984	-0.60885	-0.67455	-0.53441	-0.75254	-0.63251	-0.55333	-0.18793	-0.27151	-0.36236	-0.79045	-0.72455	-0.8837	-0.84507	-0.30619	-0.55222	-0.29078	-0.78259	-0.1021	-0.20174	-0.50649	-0.57557	-0.55062	-0.45791	-0.3932	-0.13907	0.92902	0.32572	-0.23315	0.46019	-0.54918	-0.31143	-0.53871	-0.67365	-0.35259	-0.36408	-0.4273	-0.69104	0.20577	0.26521	-1.06701	-0.4162	-0.55528	-0.88067	-0.51648
YML030W	0.14903	0.09055	0.24519	0.06566	0.15802	-0.08194	0.42159	0.80606	0.37583	0.33549	0.11408	0.3465	1.11454	0.90525	0.95649	0.86025	1.15246	1.94903	-0.09445	-0.21304	-0.24127	0.60249	0.25525	0.11372	-0.06196	0.40623	0.57913	0.19245	0.3166	-0.10249	-0.37307	0.10884	-0.34553	0.57952	0.07007	-0.0491	-0.08094	0.19436	0.2614	-0.20755	0.03557	0.14058	0.48188	-0.09573	0.19239	0.05831	0.14185	0.60977	0.59826
YAL039C	0.65553	0.43737	0.43137	0.49669	0.41763	0.21954	1.32976	1.33399	1.21789	1.27084	1.09321	1.50717	1.01849	1.00405	1.00089	0.51716	0.82794	0.68542	0.40171	-0.18015	0.45498	0.63342	1.31735	0.78315	-0.61155	-0.01658	1.30456	1.46924	0.52445	-0.07737	1.11956	1.60334	0.83087	1.42251	0.42654	0.35014	-0.14828	-0.5124	1.03222	0.71616	1.41474	1.09504	1.29793	1.35399	0.0847	0.31889	0.77159	0.90325	1.60528
YOR261C	2.13509	2.12795	2.28826	2.23226	2.39424	1.88579	2.08451	2.20596	2.01547	2.21943	2.10489	1.89946	1.58069	1.52315	1.71687	1.52876	1.83123	2.0855	1.79175	2.17504	1.57232	1.91876	1.11935	1.7945	2.08806	1.81652	2.16215	1.64468	2.05653	1.55857	1.02528	1.7541	2.15714	1.54216	1.88642	2.01024	2.03347	2.16366	1.63735	1.67834	2.48207	2.4666	1.99654	2.06732	2.2253	2.03578	2.44025	2.40054	2.23867
YMR316W	-0.9958	-0.81325	-1.37799	-1.34516	-1.18438	-1.29546	-0.83388	-1.33567	-1.119	-0.99197	-1.24099	-0.96285	-1.39389	-1.90858	-1.1966	-0.62393	-1.45212	-1.24224	-0.4372	-1.06561	-1.11973	-1.43713	-1.80092	-1.47274	-1.2522	-1.31037	-1.83242	-2.04909	-1.08015	-1.51263	-0.97364	-0.03292	-0.79023	-0.89753	-0.60226	-0.14416	-1.28876	-1.30297	-1.50924	-1.23981	-0.0099	-1.66484	-1.03414	-0.49496	-0.68316	-1.05108	-0.52507	-1.90326	-0.48296
YLR191W	-0.31887	-0.13059	-0.35631	-0.18097	-0.04667	-0.01734	-0.31347	-0.39421	-0.29437	0.02622	-0.41258	-0.18063	-0.25103	-0.14554	-0.25719	0.02885	-0.27261	0.00673	-0.26093	-0.3848	-0.13898	-0.02132	-0.1908	-0.08207	-0.37233	-0.17867	0.01928	-0.55127	-0.18545	-0.67	-0.55442	0.16766	-0.03958	0.35868	-0.37964	-0.07468	0.01506	-0.16419	-0.21021	-0.26138	-0.23331	-0.42588	-0.03641	-0.3529	-0.38873	-0.31062	-0.15879	-0.40605	-0.14947
YCR027C	-0.26709	-0.00127	-0.2779	-0.10647	-0.26531	-0.10574	0.06795	-0.12781	0.2248	0.18508	0.11791	-0.09821	0.05667	0.07793	0.20445	0.32433	0.22877	0.24423	-0.0238	-0.03605	-0.19463	-0.03702	0.45872	-0.16371	-0.25472	-0.10917	-0.02718	0.20783	-0.38829	-0.24505	0.53816	-0.00923	-0.11483	-0.01149	-0.18369	-0.52692	-0.28384	-0.44836	-0.21796	-0.55679	-0.38032	-0.24771	-0.15786	0.02278	-0.1944	-0.01608	-0.06895	-0.23798	-0.33164
YER125W	2.71095	2.67433	2.68972	2.52715	2.68762	2.74453	2.73354	2.23233	2.71216	2.7818	2.79856	2.65828	2.81315	2.76717	2.70965	2.75406	2.84903	2.74257	2.78234	2.63206	2.6675	2.63846	2.76099	2.54123	2.60521	2.55332	2.47893	2.8068	2.39669	2.38048	3.39631	2.57667	2.4	2.33681	2.72242	2.85128	2.68464	2.51147	2.51715	2.58575	2.65601	2.79409	2.5787	2.36128	2.77542	2.48352	2.60753	2.84019	2.53003
YDL046W	2.82138	2.70238	2.73714	2.77862	2.5826	2.56729	2.50617	2.73145	2.55349	3.01295	2.64987	2.74731	3.25043	3.49096	3.09161	2.91994	3.10033	2.79469	3.22425	2.94917	2.84998	2.70003	3.41272	2.33559	2.57578	3.22163	2.55094	3.38764	2.63261	2.51955	4.1099	2.50642	2.49701	2.31418	3.07445	3.09589	2.57495	2.99393	3.07495	2.58748	2.75361	2.54069	3.21537	2.50404	2.93791	2.54876	3.09659	3.35968	2.72136
YMR263W	0.11915	0.09632	0.20566	0.20261	0.261	0.04041	0.24506	0.2642	-0.06925	-0.0455	0.07493	0.36288	-0.17352	-0.2403	-0.61266	-0.43284	-0.26775	-0.10941	0.48953	0.3815	0.25019	0.43198	-0.20158	0.75363	0.10934	-0.20109	0.75572	0.08575	0.7545	0.17599	-0.91231	0.72561	0.59669	0.74571	0.26981	0.14771	0.61158	0.7742	0.14006	0.27045	0.47362	0.15123	0.33704	0.24595	0.08348	0.27295	0.63136	0.22021	0.49753
YOL113W	-1.49721	-1.30393	-1.40895	-1.20919	-1.20087	-1.51216	-1.51051	-1.57971	-1.52652	-1.91384	-1.63233	-1.32212	-1.80187	-2.0849	-1.98655	-1.47556	-1.81329	-2.03874	-1.33179	-1.32337	-1.69638	-1.68503	-1.6698	-1.80795	-1.09332	-1.13661	-1.58924	-1.98633	-1.40163	-1.50367	-1.91874	-1.38024	-1.15632	-1.42506	-1.13825	-1.31141	-1.14427	-1.14498	-1.43983	-1.4864	-1.24206	-1.2468	-1.112	-1.0984	-1.62735	-1.46801	-1.30517	-1.34576	-1.52907
YAL001C	-0.78964	-0.67046	-0.70295	-0.7492	-0.70321	-0.81172	-1.13166	-0.88128	-0.90657	-1.05984	-0.92365	-1.09494	-1.19093	-1.4032	-1.13686	-1.0412	-0.98787	-1.02433	-1.07869	-0.84725	-0.821	-0.64797	-1.20126	-1.01549	-0.54976	-0.70334	-0.78841	-0.69154	-0.80838	-0.79437	-1.61193	-1.02638	-0.8435	-1.62337	-1.14698	-1.21425	-0.70767	-0.37831	-1.0203	-1.0583	-0.57731	-0.65249	-0.75409	-1.16172	-0.67228	-0.79987	-0.78947	-0.75797	-0.88573
YDR517W	1.39362	1.75326	1.41883	1.48792	1.28506	1.27067	1.06106	1.03975	1.35801	1.38002	1.344	1.22217	1.49908	1.56311	1.60714	1.64907	1.37857	1.19607	1.45511	1.0569	1.39066	1.47059	1.72262	1.08647	1.51695	1.7302	1.32395	1.75296	1.40244	1.40781	1.81705	1.71962	1.77463	2.58671	1.2711	1.22213	1.79395	1.61934	1.68201	1.09845	1.23324	1.23176	1.45257	2.22528	1.48845	1.4707	1.60845	1.36936	1.31709
YBR197C	0.13432	0.63713	0.00503	0.30615	0.02013	0.13242	-0.32706	-0.15028	-0.46944	-0.073	-0.22324	0.1637	0.00429	-0.1213	-0.20267	-0.29219	-0.63609	-0.56435	0.40324	0.09234	-0.34457	-0.46751	0.51637	0.76544	-0.2237	-0.11288	-0.59171	-0.31397	0.19502	-0.52703	0.80877	0.91106	1.03435	1.41722	0.45975	0.26116	-0.46743	-0.18147	-0.21959	-0.08394	0.72007	0.5074	0.54917	0.87494	-0.28604	-0.70638	0.39105	0.42658	0.5116
YJR132W	1.0434	0.88242	0.7953	1.04392	0.98987	0.97328	1.03338	0.52302	1.06702	1.078	1.24079	0.90486	1.0102	0.81358	0.93054	0.89461	1.09562	0.92284	1.21991	1.11636	0.95383	0.69601	0.93321	0.84855	0.61907	0.41437	0.64364	0.88518	1.07716	0.78901	1.13941	0.32342	0.74413	0.52687	1.05709	1.00464	0.67725	0.35502	0.9633	1.06404	0.60942	0.84028	0.93859	0.79704	0.86016	0.74722	0.83922	0.47069	0.87264
YDR192C	-0.09796	0.16615	-0.19841	0.11505	-0.05066	-0.06923	-0.18854	0.04547	0.27719	0.26228	0.09164	0.1985	0.11419	0.23671	0.26139	0.40571	0.22994	-0.06938	0.11715	-0.25186	0.24633	0.15589	0.29161	0.15172	0.16348	0.24305	-0.2167	0.0373	0.17138	0.11216	0.31783	0.18008	0.44219	1.00269	0.0388	0.12302	0.06569	0.2006	0.07277	0.33303	-0.0311	-0.18352	0.20305	0.55736	0.02072	0.18905	0.01928	-0.1852	0.00768
YER021W	2.16249	2.43282	2.43541	2.38173	2.35982	2.41214	1.99254	2.04317	2.36192	2.17186	2.20553	1.94327	2.05602	2.24074	2.27572	2.21981	2.34356	2.50096	1.74618	2.02191	2.27044	1.95593	2.13942	2.17426	2.62889	2.33321	2.35415	2.19714	2.23926	2.44499	2.02333	1.88769	2.369	1.67498	2.242	2.2696	2.41994	2.41772	2.11386	2.20765	2.50991	2.76337	2.03354	1.72585	2.51795	2.54554	2.87195	2.6451	2.56726
YKL014C	1.42946	1.17583	1.58368	1.32966	1.49392	1.31446	1.11193	0.81907	1.21589	1.14087	1.27619	1.04092	1.21324	1.11524	1.34686	0.97823	1.40303	1.12566	0.83201	1.15147	1.14684	0.6295	0.61302	0.93104	0.87482	0.31002	0.91098	0.95798	1.22092	1.31972	1.00567	0.32317	0.48249	-0.02067	1.19524	1.11839	0.63137	0.5009	0.71743	1.23042	1.19651	1.29877	1.3166	0.39682	1.33015	1.26816	1.23757	1.15567	1.18643
YGL034C	-4.15926	-3.26422	-3.80215	-4.17377	-3.73123	-4.11688	-3.69418	-4.0463	-3.62041	-4.13038	-3.39379	-3.14445	-4.08546	-4.38962	-4.06037	-4.29525	-4.48367	-4.39059	-3.41806	-3.47372	-3.42557	-3.76741	-3.45035	-2.93137	-3.26769	-4.02567	-2.97042	-3.5655	-3.26861	-3.41997	-3.06608	-3.66225	-3.84511	-4.25283	-3.12073	-3.36604	-3.4084	-3.2077	-2.9442	-3.47719	-3.14934	-3.17608	-3.49476	-4.00985	-3.79186	-3.43023	-3.40761	-3.80008	-3.61278
YGR197C	-0.5252	-0.50028	-0.79391	-0.72607	-0.85761	-0.60804	-0.29997	-0.44623	-0.51267	-0.20504	-0.39865	-0.29334	0.08867	-0.13507	-0.42562	-0.08037	-0.18888	-0.31814	-0.32614	-0.45836	-0.35152	-0.19137	0.19237	-0.72119	-0.39997	-0.10912	-0.8942	-0.34643	-0.61791	-0.72118	0.53523	-0.4541	-0.17154	-0.11629	-0.7286	-0.80306	-0.69953	-0.62288	-0.38484	-0.9394	-0.53367	-0.54048	-0.45866	-0.51871	-0.84764	-0.98929	-1.0099	-0.73248	-0.80977
YDL106C	-0.12098	-0.15173	0.01963	-0.31103	-0.35663	-0.38615	-0.17666	-0.36419	-0.15061	-0.53261	-0.27296	-0.1555	-0.32409	-0.17294	-0.16348	-0.25603	-0.22484	-0.02714	-0.37069	-0.32423	-0.06246	-0.3314	-0.4687	-0.61825	-0.08257	-0.62331	0.13054	-0.21154	0.16015	-0.07091	-0.70609	-0.32411	-0.09674	-0.37929	0.11241	-0.10028	0.15613	-0.26666	-0.39961	-0.73678	-0.36817	-0.0677	-0.26735	-0.29065	0.15516	-0.2944	-0.10627	-0.25574	0.02298
YDR365C	2.49675	1.74591	2.32478	2.2864	2.46749	2.1209	2.2178	2.66815	1.75488	2.14235	2.02756	2.22649	1.57434	1.55492	1.62945	1.09413	1.61557	1.69576	2.08024	2.36266	1.61353	2.11877	1.1368	2.12823	1.58847	1.25547	1.81424	1.71494	2.26596	1.90912	0.3826	1.34546	1.31185	1.18685	1.95993	2.11589	1.44623	1.91092	1.75463	2.13127	2.34893	2.04267	2.2582	1.42044	2.02258	2.20087	2.07617	2.12097	1.85802
YNL280C	1.635	1.37485	1.52617	1.49876	1.32318	1.68289	2.23469	1.95514	2.13449	2.42921	2.00506	2.05596	2.56381	2.3554	2.38381	2.36668	2.51403	2.37571	1.65592	1.94879	1.76004	1.69083	1.90912	0.91964	1.72531	1.78182	1.67147	2.16422	1.76041	1.70047	2.44482	1.16008	1.3892	1.53933	1.43586	1.2615	1.9237	1.56091	2.04304	1.37249	1.70887	1.63983	1.86641	1.8035	1.95479	1.73927	1.78634	1.87729	1.51661
YCR030C	1.05476	1.15175	1.10436	1.0812	0.82693	1.1045	0.92284	0.88748	0.87215	0.86676	0.99927	0.89125	1.17847	1.35247	1.10518	1.41414	1.19735	1.41584	1.07897	0.96528	1.32426	1.51386	1.48949	1.04135	1.02259	1.48359	1.16174	1.76026	0.81255	1.07743	1.22221	1.21781	1.02048	1.46826	1.0733	1.1197	1.20157	1.04302	0.99254	0.82485	0.70977	1.13218	0.96288	1.34964	1.04591	0.86128	0.99206	1.16541	0.9993
YDL154W	-2.57318	-2.14712	-2.20496	-2.36097	-2.29871	-2.53919	-2.44389	-2.29306	-2.47989	-2.57442	-2.43205	-2.49645	-2.64513	-2.89601	-2.58717	-2.56898	-2.49874	-2.81079	-2.56268	-2.42627	-2.45236	-2.57243	-2.91991	-3.06892	-2.20217	-2.86095	-2.33492	-2.83864	-2.65806	-2.43213	-3.0094	-3.45108	-2.39613	-2.85649	-2.39871	-3.08299	-2.292	-2.32712	-2.27388	-2.61308	-2.37204	-2.4056	-2.30599	-2.61182	-2.46284	-2.39371	-2.37715	-2.36378	-2.36171
YDR505C	0.31184	0.07526	0.18395	0.09423	0.32421	0.31872	0.09721	-0.24332	0.11873	-0.05138	0.19164	-0.036	-0.10664	-0.30268	0.04608	-0.00724	-0.09871	-0.14198	-0.01638	-0.1143	0.49124	0.03904	0.03999	-0.11998	0.1592	-0.01951	0.03822	0.37221	-0.07077	0.25505	0.69179	-0.22558	-0.46101	-0.38191	-0.09115	-0.1361	0.32066	-0.1306	-0.15076	0.26775	0.18414	0.03591	-0.03915	-0.15179	0.21735	0.29019	0.20953	0.4499	0.11782
YGL033W	-4.15213	-4.02094	-4.04142	-4.00451	-3.6602	-4.09324	-4.01682	-3.07292	-3.87484	-3.91716	-3.90927	-4.00019	-3.81854	-3.85084	-3.57667	-4.73943	-4.21293	-4.36832	-3.62479	-3.33537	-4.64638	-4.20201	-3.76686	-3.51477	-4.07497	-3.71668	-4.49623	-3.87545	-3.7488	-3.53392	-4.13334	-4.10031	-4.33824	-3.86616	-4.02625	-3.99648	-3.57962	-3.35718	-4.0754	-3.93097	-4.33005	-3.8653	-3.79042	-4.32867	-3.36506	-3.63439	-3.6595	-3.88016	-3.63561
YMR211W	-0.53113	-0.64879	-0.45895	-0.57161	-0.52566	-0.77493	-0.66377	-0.83928	-0.47439	-0.45809	-0.32549	-0.51374	-0.22536	-0.35325	-0.06184	-0.44896	-0.36807	-0.40521	-0.74574	-0.80266	-0.74979	-1.12443	-0.94437	-0.51589	-0.94122	-1.20607	-0.70774	-0.98696	-0.38552	-0.86657	-0.55785	-0.52372	-0.27052	-0.99924	-0.44209	-0.61775	-1.02773	-1.02705	-0.59015	-0.60687	-0.68975	-0.66477	-0.82921	-0.87987	-0.74524	-0.57133	-0.66741	-0.9274	-0.45186
YGL202W	3.8424	3.68426	3.65088	3.77666	3.62484	3.91487	3.95544	3.69777	3.87048	4.03748	3.91402	4.036	4.11502	4.06293	3.91777	4.00468	4.00017	3.97822	3.67629	3.58826	3.60077	3.6263	3.88558	3.46312	3.74818	3.88016	3.66649	4.18499	3.52074	3.9043	5.33979	3.49471	3.54385	3.02992	3.6875	3.66703	3.72016	3.73341	3.59665	3.50335	4.09359	4.0622	3.63989	3.76769	3.96958	3.69706	4.17107	4.33735	3.82099
YBL036C	1.4827	1.5533	1.78247	1.51679	1.67319	1.65347	1.18398	1.21464	1.59183	1.11032	1.28515	1.20867	1.20704	1.32518	1.3364	0.96648	1.1769	1.08156	1.15317	1.5657	1.11962	1.29178	0.68916	1.17593	1.32007	1.08993	1.28173	1.01065	1.48806	0.92135	0.69459	0.23119	0.83708	0.33545	1.31314	1.55594	0.79965	1.03154	0.83771	1.5236	1.53695	1.8096	1.3803	0.58842	1.70458	1.39566	0.92141	1.30609	1.475
YIL176C	-0.50351	-1.20248	-1.07546	-0.93312	-0.9239	-0.99276	-1.29513	-1.14413	-1.26913	-1.76647	-1.30972	-0.99706	-0.59954	-0.54148	-0.6219	-0.4723	-0.26483	-0.54715	-0.62516	-1.05731	-0.76651	-0.60131	-0.59876	-0.80641	-1.03253	-0.70632	-1.87654	-2.22915	-0.50541	-1.0294	-0.54814	-0.77627	0.00483	-0.58442	-1.04502	-1.09839	-2.23145	-2.11682	-0.99478	-2.17691	-1.8544	-1.90628	-0.37428	-0.73483	-2.10213	-1.52065	-1.24687	-1.1958	-1.48072
YPR178W	-1.12409	-0.60177	-0.83342	-0.99215	-0.8437	-1.09206	-0.7812	-0.83757	-0.68627	-0.96995	-0.8304	-0.81059	-1.16014	-1.10273	-1.06027	-1.01621	-1.00275	-1.28933	-0.91771	-0.78384	-0.84202	-1.12936	-1.114	-0.9881	-0.79473	-0.87743	-0.97059	-1.05548	-0.88855	-0.99288	-1.0047	-0.42454	-0.59952	-0.07409	-0.91571	-1.02223	-0.80781	-0.78548	-0.84217	-1.03944	-0.96422	-0.99513	-0.80769	-0.61673	-0.97668	-0.83559	-0.84648	-0.92026	-0.69485
YOL147C	0.47554	0.77296	0.46529	0.72645	0.36432	0.81506	0.90537	1.4416	1.33085	1.44733	1.13993	1.35904	1.9484	1.94447	1.72532	1.64639	1.3566	1.53032	1.19975	1.0497	0.49082	0.64089	1.40758	0.44353	0.92309	1.50072	0.08094	1.35683	0.80153	0.57279	2.53077	1.37287	0.82931	1.23832	1.17786	0.85652	0.71418	0.75913	1.43271	0.73205	0.1827	0.00284	0.26537	0.80138	0.71389	1.17336	0.64752	1.07756	1.0898
YFR007W	-1.44734	-1.16706	-1.42399	-1.11565	-1.38526	-1.39178	-1.19531	-0.88375	-1.0763	-0.9187	-0.96252	-0.75405	-0.42323	-0.54174	-0.46944	-0.27771	0.05514	-0.68635	-1.29015	-1.48224	-1.26992	-1.11875	-1.13192	-1.25029	-1.48523	-1.31732	-1.25016	-0.98007	-1.8641	-1.37608	-1.04416	-1.51369	-1.19905	-1.23384	-1.5485	-1.49231	-1.7574	-1.49312	-1.21813	-1.33743	-1.22906	-1.22743	-1.73585	-0.87155	-1.23701	-1.51841	-1.30567	-1.17343	-1.08577
YEL008W	-3.05384	-2.50837	-2.96696	-3.11053	-2.81833	-2.83798	-3.08787	-3.45534	-3.65881	-3.49613	-3.5105	-3.27236	-3.37267	-3.58514	-3.68214	-4.38236	-3.22573	-3.46608	-3.40425	-3.49326	-2.64505	-2.16043	-3.26753	-3.55603	-2.4964	-2.19711	-2.85901	-2.61393	-3.9661	-2.92691	-2.71043	-3.75768	-4.48808	-3.22502	-4.089	-3.8919	-2.8894	-2.80045	-3.12865	-2.8876	-2.63314	-3.28071	-3.1158	-3.12628	-3.18747	-3.31326	-3.19957	-2.62148	-3.3723
YGR072W	-0.54718	-0.93634	-0.08913	-0.54559	-0.13473	-0.59454	-0.33882	0.23959	-0.51409	-0.20409	-0.53188	-0.39341	-0.5929	-1.05529	-0.65959	-0.84406	-0.80433	-0.34277	-0.19972	-0.31421	-1.11028	-0.9566	-1.88835	-0.59953	-0.75877	-1.26929	-0.53019	-1.18031	-0.58246	-1.11291	-1.62544	0.25439	-0.95911	0.23426	-0.70415	-0.45349	-0.59056	-0.64179	-1.05022	-0.34608	-0.02306	-0.80568	-0.2067	-1.35011	-0.53934	-0.65784	-0.14055	-0.60751	-0.34768
YNL069C	6.71871	6.65322	6.70571	6.58253	6.54957	6.66264	6.5176	6.29486	6.7548	6.2217	6.64267	6.10988	6.60509	6.44754	6.74661	6.42602	6.19952	6.31778	6.62268	6.50588	6.60651	6.37907	6.72084	5.70482	5.7643	6.40015	6.34557	6.76857	6.24183	6.3445	7.00274	6.26957	5.81795	6.40225	6.73332	6.29039	5.78786	5.66074	6.62261	5.53295	6.60282	6.56887	6.68151	6.33167	6.84758	6.32572	6.3975	6.71684	6.80241
YER022W	-0.35774	-0.48589	-0.24461	-0.45008	-0.19638	-0.26467	-0.32195	-0.38929	-0.241	-0.52178	-0.34685	-0.40871	-0.39694	-0.37505	-0.25994	-0.46881	0.08521	-0.00763	-0.65262	-0.54055	-0.5666	-0.76899	-1.19554	-0.57625	-0.51499	-0.88497	-0.13041	-0.47066	-0.24303	-0.49189	-1.3277	-1.19301	-0.6254	-0.56307	-0.31947	-0.58577	-0.46812	-0.40803	-0.58852	-0.47336	-0.35932	-0.16145	-0.41034	-0.42017	-0.20752	-0.23032	-0.28545	-0.50021	0.02012
YIL118W	0.86868	0.87065	1.0082	1.10699	1.1697	1.08308	0.54744	0.4991	0.59343	0.73109	0.75996	0.7943	0.97664	0.97352	1.20951	1.17847	0.9953	1.29162	0.90123	1.07296	1.31888	1.29204	1.1208	1.07273	1.12053	1.42574	1.16448	0.80089	1.3501	0.97802	0.9458	0.78116	1.01013	1.20159	1.03237	0.7759	1.32094	1.37116	1.0277	1.17613	0.64931	0.85387	0.76107	1.285	1.11123	1.13667	1.22158	0.98884	1.01609
YJR008W	-2.5492	-2.38127	-2.49321	-2.36906	-2.32145	-2.66519	-2.70763	-2.6484	-2.61547	-3.41789	-2.65702	-2.75736	-2.63678	-2.67547	-2.41346	-2.29696	-2.31299	-2.65285	-2.70038	-2.46776	-2.48105	-2.43719	-2.39021	-2.51922	-2.24935	-2.18917	-2.31507	-2.6222	-2.55999	-2.61458	-3.40136	-2.80451	-2.04867	-2.17449	-2.82526	-2.62655	-2.07097	-2.09095	-2.36833	-2.76903	-2.50351	-2.40274	-2.45949	-2.36415	-2.42641	-2.44439	-2.58228	-2.13004	-2.43697
YKL217W	-3.72055	-3.91746	-3.68192	-3.81143	-3.85587	-3.95869	-3.98355	-3.77151	-3.80962	-4.17394	-3.78239	-4.12938	-3.58177	-3.73327	-3.83765	-3.71924	-3.98316	-3.91696	-3.23005	-3.26391	-3.27958	-3.71139	-3.09652	-3.69205	-3.53991	-3.54521	-3.20801	-3.16501	-3.77623	-3.60695	-3.31236	-3.75768	-4.10585	-3.18927	-3.97784	-3.59302	-3.34491	-3.42976	-3.35734	-3.54098	-3.3142	-3.56507	-3.80784	-3.40414	-3.41445	-3.73183	-3.88428	-3.52731	-3.03644
YAR060C	-1.97149	-2.38641	-1.92669	-1.87121	-1.72044	-2.2834	-2.42092	-2.58243	-2.51783	-2.93824	-2.37228	-1.77418	-3.22358	-3.07597	-3.00296	-3.90034	-3.18036	-3.85919	-1.98193	-2.213	-1.55215	-1.91757	-1.9781	-2.13214	-3.08775	-3.19843	-2.01026	-2.0809	-2.34869	-3.21321	-1.87925	-2.53142	-2.48297	-3.50254	-2.0241	-2.58905	-2.11144	-2.04253	-2.1287	-2.03684	-2.06347	-1.97918	-1.84005	-2.68576	-2.2248	-3.37752	-2.63613	-2.24285	-2.67722
YCL010C	0.75415	0.64495	0.56254	0.76389	0.66258	0.5	0.76717	0.68784	0.69251	0.90411	0.93622	1.14996	0.22144	0.10395	0.24953	0.26265	0.19043	0.01471	0.8316	0.53125	0.62907	0.68194	0.52387	0.47045	0.55616	0.6081	0.51826	0.23673	0.6916	0.34913	0.58782	0.94854	1.02221	1.6498	0.63812	0.40521	0.83299	0.67991	0.56014	0.63784	0.56203	0.65295	0.87568	1.02119	0.28075	0.59797	0.91678	0.59982	0.69068
YPL036W	-1.64329	-1.60201	-1.95521	-1.87333	-1.55225	-1.72612	-1.34746	-1.4384	-1.40697	-1.04916	-1.43559	-1.01807	-1.29757	-1.6173	-1.68752	-1.47556	-1.58642	-1.31427	-1.3036	-1.86162	-1.41932	-1.28848	-0.46088	-0.97833	-1.6095	-1.00426	-1.80803	-1.31815	-1.40243	-1.31447	-0.72714	-0.80179	-1.40365	-0.39298	-1.35009	-1.49452	-1.47709	-1.50618	-1.16933	-1.49973	-1.54178	-1.83728	-1.36509	-1.30061	-1.56665	-1.61108	-1.86846	-1.68244	-1.83499
YNL303W	-3.9584	-4.86857	-3.46824	-3.5297	-3.67122	-4.10411	-4.19902	-3.52526	-3.90769	-3.68777	-3.95748	-4.42353	-4.13401	-4.17903	-3.91223	-4.69547	-3.56052	-4.19797	-4.22312	-3.95967	-4.51407	-4.33569	-4.44404	-4.01015	-3.70526	-3.82388	-3.62627	-3.84783	-2.85827	-3.86033	-4.51095	-4.56152	-4.81168	-2.70305	-3.57465	-4.13479	-4.35243	-4.2677	-3.70616	-4.15449	-3.7655	-4.08559	-3.98383	-4.65277	-4.05898	-4.13455	-4.05153	-3.95221	-3.60787
YJR024C	1.70212	2.08501	1.69894	1.85499	1.59521	1.7388	1.62638	1.33932	1.86424	1.72057	1.75664	1.58168	2.45216	2.40576	2.21153	2.47409	2.18426	2.40099	1.86754	1.84066	1.4108	1.60407	2.07937	1.78067	1.41805	1.55493	1.43304	1.82805	1.32478	1.60231	2.26105	1.18974	2.23513	1.43593	1.66258	1.6387	1.50374	1.71272	1.80626	1.63902	1.01845	1.4408	1.25083	1.5233	1.57846	1.53425	1.42951	1.37621	1.51118
YFR011C	0.7288	0.44075	0.96492	0.59147	0.95934	0.51508	1.34825	1.05898	0.84062	0.6715	0.80066	1.03047	1.2663	1.21525	1.37185	1.23606	1.17861	1.64086	0.3798	0.65313	0.86883	1.17265	0.56018	1.03044	0.76399	0.3909	1.59348	1.0385	0.48291	0.58721	0.41902	1.32489	0.38051	0.89723	0.26482	0.52189	1.02725	0.96615	0.65739	0.65161	1.13725	1.06484	0.58344	0.54488	0.93485	1.12891	1.07541	1.3057	1.28885
YAL047C	-1.63936	-1.49039	-1.53134	-1.81271	-1.55396	-1.97457	-1.56676	-1.66119	-1.70157	-1.91698	-1.55908	-1.50792	-1.83059	-2.26381	-2.0179	-1.74699	-2.05045	-1.77801	-2.03069	-1.91009	-1.9617	-2.12373	-2.24723	-1.96886	-1.71807	-2.50189	-1.55329	-1.93179	-1.65078	-1.68817	-2.50432	-1.43072	-1.25502	-2.12632	-1.65318	-2.02327	-1.76322	-1.82007	-1.97953	-2.04436	-1.57905	-1.53674	-1.5675	-1.66036	-1.65312	-1.68697	-1.71732	-1.63305	-1.51864
YER056C-A	6.23173	6.17404	6.19031	5.98255	6.34554	6.26716	6.52538	6.33992	6.24706	6.02252	6.19028	6.19268	6.09859	6.21074	6.33424	5.99175	6.52428	6.1318	6.25774	5.90505	6.50464	5.8582	6.15393	6.10177	5.81568	5.99798	6.847	6.1751	6.91946	6.36774	5.82864	6.40953	6.24556	6.03037	6.17404	6.27964	6.30714	6.0033	6.67471	5.35867	6.48429	6.32009	6.18546	6.45565	6.64978	6.40803	6.58783	6.34035	6.58546
YBR042C	0.85361	0.74333	0.75383	0.88429	0.90993	0.99749	0.56236	0.07032	0.59721	0.59678	0.3579	0.30596	0.7268	0.69845	0.77801	0.32445	0.66185	0.24689	0.48182	0.53873	0.9537	0.95807	0.57128	0.46589	0.41957	0.73061	0.29263	0.65468	0.49969	0.31998	0.85114	-0.01945	0.10876	-0.38465	0.61555	0.50094	0.62218	0.4917	0.29741	0.46833	0.17774	0.39109	0.48066	-0.21547	0.45631	0.42307	0.62017	0.45046	0.36888
YDR256C	-2.89221	-2.3456	-2.66069	-2.55447	-2.62793	-2.83855	-2.60684	-2.66905	-2.64815	-2.94561	-2.63558	-2.30131	-2.33615	-2.51737	-2.40932	-2.11982	-2.396	-2.54692	-2.67765	-2.77457	-2.73839	-2.88749	-2.78255	-3.08581	-2.92175	-3.26844	-2.60934	-2.69718	-2.81878	-2.46672	-2.48082	-1.76023	-2.58146	-2.74286	-2.47044	-2.92676	-2.51186	-2.56639	-2.66778	-2.92274	-2.62214	-2.43318	-2.34689	-2.91843	-2.60779	-2.65801	-2.93346	-2.78048	-2.37093
YFL065C	3.08546	2.95367	3.05041	3.02367	2.90974	3.22052	1.98392	2.41313	2.28159	2.50811	2.61494	2.47961	2.00849	1.83862	1.76194	1.81152	1.53537	1.59261	2.93251	3.65542	2.21983	2.4555	2.70088	2.61027	3.4442	3.49809	2.24281	2.38301	2.821	3.6432	3.50062	3.12113	2.86707	3.27396	2.79591	3.14092	1.91433	1.97945	2.85922	3.00661	2.54963	3.04833	3.80338	2.85493	3.33841	3.76364	2.43946	3.10358	2.80123
YNL287W	2.59704	2.26818	2.63255	2.50334	2.48342	2.61155	2.5793	2.13153	2.66048	2.52506	2.66972	2.49825	2.61233	2.4277	2.51408	2.50241	2.66212	2.53812	2.45618	2.46049	2.6571	2.48687	2.47435	2.199	2.75876	2.43957	2.57394	2.48217	2.45046	2.62476	2.54799	2.11355	2.1891	1.90992	2.78634	2.50972	2.43143	2.31213	2.52558	2.48255	2.56897	2.80872	2.48321	2.38649	2.65221	2.70537	2.89598	2.81649	2.64872
YGR103W	2.96423	2.8031	3.05342	2.90196	3.16796	3.06074	3.3514	3.64229	3.21004	3.37058	3.34921	3.25848	2.85892	2.85958	3.01763	2.71991	2.96558	3.22522	2.88294	2.94398	2.37267	2.52228	2.37643	3.09734	2.75111	2.41249	2.73871	2.53416	3.01541	2.93023	2.00411	2.76431	2.15745	2.33963	2.98687	2.94087	2.48317	2.75121	2.69083	2.98379	3.28144	3.0368	2.95457	2.421	3.29765	3.11305	3.13531	3.15431	3.00814
YAL065C	-1.3072	-1.29583	-1.3468	-1.42819	-1.64012	-1.74566	-2.33096	-2.94092	-2.67128	-2.10859	-2.34966	-2.35333	-0.72156	-0.69009	-1.0813	-1.15305	-1.50583	-1.0339	-2.46832	-1.74804	-0.89432	-0.97678	-1.09425	-2.23141	-2.61296	-2.3958	-1.31959	-0.69004	-2.67607	-2.77166	-1.11625	-1.44979	-0.27983	-0.03741	-2.297	-2.01021	-2.6023	-2.71552	-1.68109	-2.22824	-1.33788	-1.05119	-0.05714	-0.96753	-1.76368	-2.62175	-3.29389	-1.56112	-2.52385
YLR061W	6.5106	5.86887	6.59774	5.8949	6.37085	5.99841	6.02519	6.47091	6.29965	5.98777	6.26442	5.96166	6.28377	6.36237	6.48942	5.89915	6.61046	6.10282	6.40367	5.94974	6.72472	5.78505	6.43153	5.84883	5.64801	5.49069	6.5328	6.14969	6.77599	6.15927	6.28776	5.5348	5.56676	5.01746	6.34983	6.04065	5.59529	5.98892	6.42969	5.40166	6.45774	6.3991	6.48893	5.68201	6.68841	6.24081	6.45005	6.38515	6.47104
YLR171W	-4.18566	-3.84224	-4.23827	-4.03136	-4.02458	-3.39081	-3.56769	-3.01956	-3.08663	-3.04494	-2.99736	-2.84112	-3.50946	-2.11225	-3.94042	-3.08348	-3.73716	-3.24644	-4.22216	-3.69152	-3.9919	-2.87544	-3.30366	-3.49934	-3.67957	-3.62878	-4.09562	-2.76612	-4.3602	-4.33932	-3.7877	-4.26955	-4.71675	-1.10796	-4.12692	-3.51912	-3.58532	-2.90334	-3.34059	-3.72794	-3.6954	-3.501	-3.78553	-2.4776	-3.38266	-3.69184	-3.45948	-3.30778	-3.72959
YOR281C	1.0159	0.8479	1.22325	1.09192	1.4615	1.10561	1.26411	1.09247	1.0142	0.89936	1.16862	1.35232	0.86561	0.48712	0.85246	0.99055	0.66968	0.9853	1.16095	1.28365	0.66244	0.87615	0.43651	0.94199	1.01884	0.66229	1.37527	0.82265	1.57452	0.74361	-0.17411	1.01653	0.95349	1.17696	1.16355	1.06236	1.07062	0.93097	1.12995	0.93077	1.43002	1.0673	1.1675	1.24292	1.26422	1.14196	1.13824	1.07599	1.43573
YJL078C	3.26727	3.13983	2.91967	3.03363	2.8638	2.95823	2.97632	2.98607	2.95723	2.83065	3.0394	2.93268	4.62113	4.75213	4.35137	4.50431	4.55693	4.52318	2.51456	2.3681	-0.50002	-0.00908	2.99413	2.96796	-0.93358	-0.0117	1.6894	2.80024	3.13187	3.84381	5.21498	3.85848	2.94071	3.41572	3.50308	3.63867	-1.16868	-1.03932	-0.75455	-1.29031	3.90793	3.81179	3.60422	4.13665	2.26302	3.53498	4.03961	3.65727	4.14902
YBR162C	3.82549	3.46651	3.57575	3.67833	3.75306	3.69631	3.92674	3.56498	3.70792	3.7048	3.67485	3.707	3.87407	3.86636	3.81031	3.802	3.69945	3.68844	4.71121	4.43907	3.63377	4.1805	4.71103	3.98782	3.94583	4.37712	3.38621	4.13626	4.10541	3.84062	5.07467	3.56242	4.05262	3.58724	4.16507	4.07332	3.80488	4.0162	4.10172	3.90934	3.88234	3.90643	3.67463	3.6522	3.83942	3.48845	4.0501	3.7873	3.68721
YMR114C	-1.8526	-1.54528	-1.69686	-1.65844	-1.47928	-1.85851	-1.56359	-1.41376	-1.69701	-1.87963	-1.64576	-1.38194	-2.07442	-2.10473	-2.03028	-2.03256	-2.00592	-2.27403	-1.78683	-2.02701	-1.93293	-1.42122	-2.03898	-1.68305	-1.49445	-1.38323	-1.55573	-1.76984	-1.7343	-1.50867	-2.24693	-1.18702	-1.84046	-1.05575	-1.48228	-1.61705	-1.437	-1.40489	-1.63064	-2.07872	-1.61293	-1.60355	-1.38806	-1.18833	-1.61993	-1.5738	-1.55436	-1.5883	-1.70687
YJL152W	-4.34079	-2.98227	-3.83973	-4.12678	-4.25084	-4.27012	-4.56448	-4.39796	-4.56525	-4.452	-4.27275	-4.08194	-4.17641	-4.33316	-4.47729	-4.77167	-3.33402	-4.41252	-4.48392	-3.88259	-4.96006	-4.44817	-4.38754	-4.44975	-4.27143	-4.57417	-4.16397	-4.12472	-4.71662	-4.1557	-4.11868	-4.66175	-4.27729	-3.96371	-4.6079	-4.63148	-4.91723	-4.46673	-4.22979	-4.23552	-3.90481	-4.3337	-4.46223	-4.3623	-4.1505	-4.36131	-4.60229	-4.38423	-4.08127
YGR251W	0.57835	0.28084	0.87844	0.39131	0.64751	0.67032	0.76324	1.25764	0.74641	0.91285	0.77097	0.92209	0.65046	0.60365	0.58286	0.45555	0.52931	0.78139	0.60604	0.70724	0.23804	0.56913	0.25183	1.42651	0.40858	0.19093	0.66876	0.08856	0.82609	0.23535	0.10292	0.5967	0.47715	0.7318	0.44808	0.80129	0.62217	0.73892	0.5737	1.0498	1.11221	0.7457	0.75347	0.36715	0.62085	0.33259	0.67245	0.54293	0.91984
YJL067W	-4.22302	-4.57976	-3.96621	-4.28675	-3.94445	-4.12168	-4.12778	-4.25967	-4.49366	-4.46479	-4.34768	-4.5929	-4.03496	-4.16894	-3.99111	-4.27244	-4.14299	-3.67086	-4.17555	-3.73727	-5.0371	-3.85648	-4.09568	-4.27345	-4.20139	-3.70164	-4.55914	-4.29004	-2.51818	-4.27687	-4.53991	-4.67625	-4.42578	-3.57166	-4.41036	-4.14571	-4.93789	-4.35679	-4.35591	-4.63564	-3.80687	-4.17658	-4.57341	-3.3088	-4.11146	-4.59225	-4.06771	-4.41725	-4.25255
YBR094W	0.26131	0.21343	0.38693	0.3785	0.25947	0.31547	-0.07226	-0.3635	-0.01339	0.07637	0.06871	-0.0744	0.33796	0.39249	0.31066	0.13865	0.50074	0.25975	0.00588	0.04615	0.32067	-0.24442	0.27351	0.12119	-0.22913	-0.39577	-0.235	-0.22335	0.30359	0.23771	-0.45371	-0.24867	0.04492	-0.3454	0.46449	0.39375	-0.37429	-0.49266	-0.16244	-0.06332	0.42108	0.2834	0.20337	0.07128	0.16042	0.19776	0.35156	0.24846	0.21155
YDR118W-A	-1.59004	-1.69006	-1.37348	-1.7631	-1.70143	-1.81286	-1.41465	-1.25285	-1.3993	-2.1521	-1.83754	-1.622	-3.19111	-2.9715	-0.67882	-4.85115	-3.46908	-0.67486	-1.61799	-1.75964	-1.53503	-1.70665	-1.49842	-1.85428	-1.90358	-1.93822	-1.24241	-1.80651	-1.72693	-1.93462	-1.55555	-1.81014	-1.66983	-1.99477	-1.23306	-1.7773	-1.58293	-1.43434	-1.90131	-1.88615	-1.88417	-1.50925	-1.7362	-1.30677	-1.6387	-1.63582	-1.90232	-1.62537	-1.56188
YGR065C	0.19865	-0.09815	-0.15183	0.04934	-0.00817	0.19937	2.17377	2.26014	2.13648	2.2953	1.87366	2.03948	0.45482	0.27109	0.04513	0.46411	0.25249	-0.03888	0.79968	0.76607	1.73441	1.60666	1.28391	0.24073	2.28689	2.39552	2.11032	2.20872	0.15488	0.44807	3.13459	2.01903	0.28574	0.73648	-0.01485	0.23508	0.83666	0.7856	1.72466	1.45043	2.09679	1.42101	1.65928	1.48904	0.47065	0.26203	0.27389	0.4746	0.07054
YGR031C-A	-3.66656	-3.90299	-3.76575	-3.89644	-4.06905	-4.07021	-3.94327	-4.31821	-4.45632	-4.645	-4.21228	-4.18054	-3.82441	-4.08191	-4.08398	-4.39918	-4.1724	-3.80621	-3.83467	-3.55742	-3.7308	-3.66481	-3.64948	-3.52537	-4.1124	-3.45723	-3.89485	-3.4402	-3.60094	-3.94192	-3.64313	-4.12591	-4.29082	-3.50006	-3.91556	-3.78262	-3.25567	-3.37235	-4.04261	-4.0417	-3.85231	-3.7149	-3.74204	-3.48913	-3.77556	-3.97092	-3.80737	-4.4078	-4.28696
YGL251C	-2.14669	-2.64848	-2.03526	-2.29695	-2.1942	-2.49512	-2.26494	-2.23463	-1.91582	-2.44717	-2.11119	-1.98531	-3.59368	-3.35409	-3.23539	-3.20208	-3.41539	-3.39514	-2.35219	-2.26883	-2.69922	-2.88505	-2.41711	-2.23919	-2.60935	-3.35965	-2.18304	-2.63451	-2.37121	-2.31414	-2.3679	-2.50404	-2.71324	-3.37961	-2.25893	-2.92197	-2.97687	-3.0665	-3.26301	-2.90636	-2.46547	-2.56451	-2.10404	-2.79427	-2.62494	-2.33664	-3.41007	-3.0507	-2.09488
YOR260W	2.47173	2.60841	2.58183	2.48124	2.48877	2.50458	2.65371	2.69356	2.85757	2.78441	2.9466	2.66441	2.82985	2.88733	2.88147	2.62593	3.01263	3.14381	2.62981	2.47126	2.7815	2.40117	2.5733	2.75708	2.50829	2.34007	2.4303	2.52284	2.71424	2.73231	2.83895	2.40157	2.46838	2.31928	2.95334	2.73853	2.33376	2.47565	2.61937	2.57266	2.57549	2.71937	2.78817	2.51628	2.78135	2.6542	2.54553	2.52493	2.85113
YEL017C-A	5.26432	4.3517	5.03259	4.60045	4.39707	4.76959	5.68881	5.55802	5.42452	4.9516	5.48894	5.07807	5.51718	5.40203	5.4381	5.46158	5.78657	5.1971	4.76015	4.87958	4.91039	4.67938	5.29795	4.57487	4.78796	5.11975	5.08926	5.12624	4.49339	4.84502	5.45792	5.16231	4.28206	4.47098	4.77628	4.6371	4.83881	4.93011	4.34505	4.6551	5.54344	5.24024	4.45678	5.03369	5.67991	5.14361	5.40383	5.32737	4.74182
YKL021C	1.19448	1.19915	1.38941	1.40832	1.37824	1.24452	1.50978	1.6103	1.32282	1.62875	1.33245	1.49781	1.5979	1.60281	1.45328	1.31105	1.5589	1.70332	0.86857	1.46446	0.69958	0.77417	0.70067	1.10174	1.04662	0.71947	0.96302	0.66662	1.02942	0.99084	0.55782	0.87721	1.04525	0.13273	1.16911	1.26888	0.66727	1.0656	1.34144	1.38801	1.30864	1.3701	0.9678	0.80138	1.43363	1.44969	1.43882	1.28454	1.17262
YKR028W	1.40503	1.2008	1.30156	1.185	1.34927	1.38811	1.34229	1.09411	1.25136	1.24405	1.32142	1.14847	0.94989	0.67239	0.83912	0.95308	0.86618	1.06066	0.88013	1.10929	1.02286	0.91206	1.17871	1.0858	1.06437	0.98608	0.84471	1.03271	1.1387	1.12807	1.40148	0.76022	0.85291	0.80651	1.20315	1.36404	0.85713	0.58759	0.86988	1.20915	1.28492	1.21733	1.31417	0.95687	1.21677	1.12737	1.09682	1.37116	1.09811
YOR374W	0.42554	0.43737	0.20239	0.63441	0.1975	0.79321	-0.38992	-0.12569	0.10348	-0.09151	-0.04304	-0.51734	0.53749	0.69048	0.24504	0.50984	0.40078	-0.11167	-0.35413	-0.38361	-0.32209	0.59763	2.53655	1.32866	0.54141	1.16658	1.10468	1.76697	0.22863	-0.34686	1.42058	0.8381	0.62053	1.23288	-0.47283	-0.22195	2.04562	2.3169	0.96356	1.1195	1.63612	1.69907	-0.26529	1.05134	1.78695	0.09535	1.8367	2.3136	1.21635
YNR062C	-3.69449	-4.32737	-3.71585	-3.74861	-3.67835	-3.80662	-3.69985	-3.67105	-3.86555	-3.97102	-4.06213	-4.02286	-3.72877	-3.73896	-3.96489	-3.63247	-4.1184	-3.78833	-2.90153	-3.32957	-3.07506	-3.15426	-3.2004	-3.12038	-4.05598	-3.64433	-4.3519	-3.81206	-3.89535	-3.73414	-4.08268	-3.65691	-4.14146	-2.77215	-4.11752	-3.74086	-3.6308	-3.59463	-3.17738	-3.43827	-4.0146	-3.617	-4.07774	-3.48913	-4.01806	-3.68696	-3.82417	-3.75513	-3.91992
YHL026C	-0.22091	-0.41033	-0.60863	-0.62388	-0.69932	-0.50494	0.83639	0.73772	0.812	1.02401	0.78271	1.07517	1.03869	0.53703	0.26744	0.52302	0.60151	0.52328	0.99191	0.68982	0.58926	0.56053	0.34195	-0.33076	1.09515	1.37473	0.61216	0.76168	0.39204	0.78466	0.54473	0.15612	-0.18963	-0.262	-0.24138	-0.58475	0.43336	0.59213	0.39697	0.12079	0.70104	0.42213	0.87418	0.91361	0.77988	0.62523	0.87333	0.6505	-0.37179
YHR014W	-4.27336	-4.36285	-4.0259	-4.19028	-4.15597	-4.222	-3.97907	-3.77501	-3.84873	-4.1563	-4.0023	-3.9281	-4.51667	-4.4888	-4.07426	-4.53907	-4.23223	-4.33927	-3.48168	-3.85186	-4.29303	-4.04651	-3.60658	-3.80086	-3.75907	-3.74553	-4.01096	-4.28229	-3.77797	-3.26654	-4.35427	-4.29332	-4.41814	-3.51812	-4.24025	-3.9782	-3.79346	-3.74054	-3.67221	-3.7571	-3.82078	-4.39709	-3.53626	-4.48782	-3.72513	-3.46826	-4.04401	-3.69763	-3.58764
YJL102W	-1.44304	-1.29581	-1.3768	-1.52203	-1.17042	-1.57229	-0.64705	-0.76543	-0.7597	-0.75754	-0.61618	-0.60738	-0.65106	-0.57623	-0.3133	-0.39096	-0.5356	-0.63963	-1.53586	-1.52448	-1.18292	-1.39897	-0.88499	-1.17489	-1.60467	-2.04527	-0.79016	-1.04899	-1.58604	-1.11035	-0.39529	-0.61784	-1.19285	-2.13307	-1.41064	-1.63959	-1.02305	-1.52352	-1.23074	-1.34535	-0.49144	-0.51256	-1.39269	-1.46157	-1.20861	-1.23534	-0.8993	-0.77263	-0.86414
YDL015C	3.15659	2.77418	2.90201	3.03065	2.89668	3.16696	2.96186	2.76509	3.15283	3.16116	3.16239	2.86092	3.64239	3.47722	3.52186	3.52063	3.50976	3.24876	3.10578	3.19393	3.16565	3.1402	3.27227	2.78393	2.59553	3.26034	2.94858	3.28394	2.72763	2.72825	3.82481	2.16274	2.18365	1.85664	2.9957	2.91719	3.13101	2.49278	3.05549	2.95061	2.97764	2.8821	2.91946	1.9775	3.13069	2.9345	3.13559	3.31314	2.95692
YCR028C	0.72347	0.4368	0.44878	0.5992	0.46047	0.76632	0.60819	0.29567	0.50168	0.69041	0.6748	0.76007	1.00687	0.98757	0.83992	0.96087	0.86479	0.86101	1.07768	0.99607	0.63772	0.53787	1.09956	0.42627	0.5955	1.03901	0.05959	0.72748	0.3661	0.46764	1.70019	0.6112	0.71719	0.37738	0.69574	0.74886	0.73136	0.22127	0.6191	0.59828	0.64261	0.36877	0.6206	0.61538	0.31936	0.47402	0.57553	0.4746	-0.00856
YCR016W	1.60314	0.47799	1.38007	1.06199	1.54442	1.18021	1.4928	1.5228	1.12971	1.01417	1.04011	1.1109	0.9841	0.63011	0.53806	0.31646	0.69927	1.09921	0.97912	1.52745	0.37398	0.86356	-0.06765	1.41498	0.76551	0.04521	1.4153	0.6941	0.80137	1.02996	-0.41197	0.10316	0.16108	-0.09289	0.9361	1.39331	0.78191	1.02362	0.50846	1.13714	1.41113	0.94952	1.17569	0.14695	1.40038	1.29312	1.35234	1.35516	1.32738
YER058W	-0.35983	-0.28389	-0.20899	-0.37616	-0.23827	-0.7628	-0.33586	0.85792	-0.14395	0.00444	-0.37978	0.17414	0.5254	0.26448	0.32696	-0.19974	-0.22581	0.48741	-0.22281	-0.27834	-0.48488	0.09054	-0.13339	0.22009	-0.50649	0.16033	0.57022	0.00181	-0.44479	-0.82924	-1.27583	0.72239	-0.02704	0.06614	-0.63288	-0.35394	-0.16771	0.18098	-0.11537	-0.49868	-0.08343	-0.44876	-0.28597	0.39096	-0.4655	-0.14199	-0.38101	0.16791	0.12572
YER149C	-0.27564	-0.16039	-0.27055	-0.3341	-0.11519	-0.53817	0.12369	0.16834	-0.01831	-0.06036	-0.00656	0.23895	-0.29329	-0.26131	-0.33299	-0.53831	-0.34878	-0.34102	-0.13757	-0.182	-0.25877	-0.42528	-0.40095	0.13467	0.08476	-0.43304	-0.31261	-0.8184	-0.33872	-0.20567	-0.67173	-0.1536	0.02613	-0.064	-0.22536	0.0371	-0.06262	-0.15231	-0.2638	0.0632	0.07058	-0.0399	0.15569	0.00449	-0.32897	-0.24337	0.15087	-0.2164	0.00021
YJL147C	-1.68946	-1.50779	-1.68205	-1.65209	-1.5501	-1.8093	-2.32148	-2.34418	-2.05083	-2.22101	-1.88729	-2.16604	-2.22917	-2.37063	-2.21221	-1.7405	-1.64573	-1.7845	-2.18422	-1.98709	-1.45801	-1.83965	-2.02407	-2.03623	-1.82479	-2.03381	-1.58722	-2.33729	-2.08146	-2.11795	-1.64665	-2.76252	-1.49934	-2.83213	-1.88694	-2.14441	-1.68825	-1.68932	-2.2515	-2.61344	-2.0714	-2.07519	-1.97738	-1.86678	-1.80487	-2.00429	-1.81515	-1.69086	-1.42117
YDL035C	-0.06878	-0.375	-0.2737	-0.31384	-0.11847	-0.14059	-0.28165	-0.53125	-0.53688	-0.42787	-0.29821	-0.37772	-0.40662	-0.5283	-0.55126	-0.39556	-0.42257	-0.59437	-0.11463	-0.22235	-0.38353	-0.44791	0.09739	-0.20805	0.02469	-0.05073	-0.42336	-0.18018	-0.05615	-0.39727	-0.47869	-0.39337	-0.35161	-0.13525	0.02462	-0.18733	-0.13185	-0.37024	-0.122	-0.10095	-0.30674	-0.07784	-0.03325	-0.42625	-0.127	-0.41662	-0.39915	-0.15059	-0.48528
YDR533C	-0.68312	-0.54319	-0.89872	-0.46383	-0.78024	-0.40214	-0.86661	-0.69948	-0.78063	-0.8983	-0.58964	-0.97589	-1.22775	-1.27275	-1.07677	-0.63445	-0.74301	-0.94484	-1.10038	-1.42457	-0.55073	-0.5014	-0.33397	-0.28141	-0.86828	-0.6282	-0.60085	-0.19289	-1.85647	-0.35326	0.38222	0.28399	-1.44096	-0.73045	-1.6628	-1.65599	-1.60031	-1.5051	-0.37918	-0.27049	-1.76621	-1.35939	-1.38866	-0.04312	-0.77636	-0.36214	-1.44528	-1.01697	-0.44288
YGL222C	-0.36002	-0.00599	-0.27686	-0.14674	-0.45249	-0.34378	-0.06653	-0.4961	-0.16783	0.69998	0.15736	0.17919	0.01861	-0.13132	-0.08029	0.08207	-0.83781	-0.89082	0.74027	-0.19016	1.06535	0.60926	-0.01639	-0.54172	-0.06059	0.00479	0.19616	0.30035	-0.76092	-0.39363	-0.60407	0.4085	0.35567	1.31924	0.44403	-0.25609	0.11453	-0.25512	-0.09987	0.12222	-0.63986	-0.47562	-0.55209	0.71792	-0.50501	-0.31136	-1.00295	-0.65675	-0.45867
YDL090C	-0.99319	-0.84837	-0.75901	-0.83276	-0.74465	-1.05435	-1.00083	-1.14606	-0.79663	-1.02798	-0.93337	-0.9195	-1.07306	-0.8154	-0.72457	-0.81465	-0.96497	-0.96741	-0.66648	-0.83283	-0.31673	-0.70575	-0.33808	-0.70059	-0.59821	-0.57717	-0.45688	-0.79592	-0.45151	-0.96787	-0.47814	-0.9741	-0.53036	0.12846	-0.37874	-0.68562	-0.56966	-0.53957	-0.48136	-0.63275	-0.96535	-1.01586	-0.80374	-0.57855	-0.68439	-0.67813	-0.68625	-1.00869	-0.49775
YBR177C	1.4129	1.65472	1.40683	1.58819	1.30934	1.72612	0.37551	0.4977	0.78244	0.55812	0.79458	0.48455	1.5737	1.73149	1.54857	1.67886	1.7956	1.61832	1.0336	0.99784	1.83178	1.67701	1.43196	1.48136	0.96926	1.08325	1.11742	1.94424	0.59316	1.19167	1.86663	1.48632	0.41419	0.56484	1.04678	1.1189	0.85438	0.87881	1.19431	1.25489	0.62831	0.99299	1.29917	2.00461	1.45286	1.28676	0.42522	1.0601	1.81626
YJL034W	3.11864	3.39466	2.86858	3.51015	3.19798	3.58453	3.7603	3.97696	3.84837	3.94898	3.66077	3.85419	3.60388	4.02014	3.6857	3.84477	3.7998	4.09704	3.49563	3.86756	3.46224	3.77271	3.87968	3.65957	3.83307	4.12608	3.3606	3.74872	3.40426	3.6394	3.45122	2.95484	3.18625	3.30562	3.68286	4.20232	3.68271	3.98406	3.68407	3.73449	3.90697	4.23229	3.49712	3.63808	3.30961	3.65203	4.27705	4.34885	3.32939
YML012C-A	-3.45905	-4.52305	-3.67924	-4.11016	-3.87263	-3.97726	-2.39736	-2.19443	-3.03066	-2.55757	-2.39613	-2.82015	-3.62979	-4.08803	-3.48132	-3.81847	-3.45631	-4.84188	-3.11066	-2.64697	-5.1957	-4.24785	-2.32255	-2.70831	-3.0474	-2.4058	-3.86614	-3.34794	-4.77068	-3.27532	-1.95675	-2.49706	-4.2771	-2.63482	-4.35475	-2.80825	-4.80627	-3.70637	-2.03088	-2.41659	-2.74129	-2.42443	-4.91463	-4.11859	-2.59967	-3.2416	-3.03543	-2.73518	-4.42404
YNR059W	-1.18635	-0.91297	-1.32092	-1.27961	-1.23586	-1.2719	-1.39413	-1.34185	-1.12375	-1.42341	-1.17282	-1.32564	-1.27727	-1.33901	-1.4326	-1.06691	-1.14351	-1.45629	-1.04077	-1.32539	-1.02364	-1.14472	-1.24108	-1.62855	-1.18583	-1.18026	-1.70683	-1.43076	-1.13522	-1.77513	-0.59669	-1.15644	-1.05135	-1.21345	-1.09882	-0.97789	-1.33634	-1.06368	-1.05764	-1.39775	-1.08288	-1.14504	-1.2752	-1.07822	-1.43164	-1.58981	-1.31943	-1.39614	-1.22885
YOR034C-A	-1.35655	-2.10656	-1.21612	-1.31375	-1.55709	-1.74281	-1.09854	-0.98375	-1.07195	-1.77775	-1.20416	-1.37954	-0.98713	-1.13385	-1.04363	-1.46504	-0.74535	-0.84833	-2.0376	-1.4596	-1.43651	-1.56357	-1.29162	-1.76126	-1.37439	-1.43855	-1.18274	-0.9653	-1.34833	-1.19078	-0.9542	-2.83436	-1.90335	-4.00947	-1.09615	-1.66064	-1.13585	-1.62241	-1.10435	-2.22344	-1.24946	-1.13882	-0.9456	-2.38832	-1.27143	-1.51629	-1.60992	-0.96896	-1.57297
YGR156W	0.14605	0.22601	0.22886	0.41717	0.01816	0.26558	0.19423	0.604	0.45463	0.31292	0.32214	0.47203	0.49655	0.3612	0.21961	0.26019	0.42355	0.28574	0.36299	0.24737	0.10219	0.00252	0.55207	0.24594	0.48578	0.32287	-0.20797	0.18633	0.35069	0.65341	-0.01952	0.34459	0.17184	0.24998	0.3392	0.69619	0.02453	0.28441	0.52721	-0.07345	0.3216	0.13177	0.69444	0.49514	0.34538	0.54105	0.22939	0.14041	0.74488
YLR066W	1.48739	1.44366	1.41573	1.46405	1.37461	1.46041	1.39568	1.61193	1.41512	1.24466	1.41805	1.24683	1.68662	1.54873	1.47966	1.5959	1.90356	1.9295	1.42899	1.62557	1.23103	1.37697	1.35009	1.48418	1.27546	1.65293	1.33062	1.40278	1.49882	1.12101	1.20291	1.27334	0.92601	0.69827	1.51579	1.4801	1.20336	1.35405	1.52443	1.24786	1.39174	1.72596	1.02655	0.72166	1.66003	1.31966	1.24103	1.38608	1.25234
YBR125C	0.35542	0.42579	0.03731	0.21325	0.36766	0.30806	0.41486	0.14249	0.55199	0.71787	0.59572	0.61285	0.87974	0.63942	0.63074	0.61041	0.65031	0.58351	0.98554	0.44088	0.31104	0.1354	0.80234	0.32652	0.0989	0.18509	0.05079	0.19867	0.1956	0.55858	1.25177	0.49921	1.12083	1.06725	0.77879	0.57521	0.38603	0.30356	0.7866	0.71659	0.42693	0.31518	0.55688	0.85758	0.36038	0.18301	0.31287	0.1335	0.58222
YOR376W	-4.5884	-4.3848	-4.73063	-4.76331	-4.60433	-4.59034	-5.01595	-4.58738	-4.95396	-5.26201	-4.74908	-4.90495	-4.59853	-4.75259	-4.61528	-4.99257	-4.90141	-4.92779	-4.32926	-4.6758	-4.61257	-4.90593	-5.05403	-4.81864	-4.59552	-4.67608	-4.63503	-4.35319	-5.11202	-4.86096	-4.33442	-4.61122	-4.40786	-4.79569	-4.46045	-4.63087	-4.21835	-4.335	-4.56062	-4.8615	-4.70802	-5.18998	-4.85844	-4.39533	-4.5918	-4.72643	-4.24431	-4.30018	-4.66473
YBR173C	2.52044	2.58257	2.69667	2.76343	2.52675	2.6235	2.92093	3.48613	2.74068	2.66559	2.8575	2.98529	2.86578	3.27883	3.19955	2.72604	2.93767	2.94014	2.52418	2.9431	3.28929	3.40588	2.89155	2.65198	2.96575	3.56758	3.29633	3.38496	2.88377	3.49569	2.48139	2.97028	2.40199	2.5596	3.05698	2.79158	3.10539	3.56417	3.06602	2.65766	2.92873	2.84907	2.86663	2.82025	3.22298	3.42483	2.76451	2.85821	3.096
YCL023C	-4.54879	-4.81045	-4.48198	-4.47039	-4.65982	-4.28649	-4.62114	-4.58738	-4.41898	-4.61182	-4.81656	-4.74475	-5.00833	-4.16894	-4.92108	-4.95039	-5.05312	-4.84188	-4.75012	-4.23519	-4.83332	-4.72328	-4.63005	-4.43315	-4.3688	-4.37394	-4.57846	-4.07442	-5.18037	-4.3974	-4.1899	-5.01939	-4.66971	-4.60683	-4.35475	-4.55325	-5.24597	-4.25284	-4.31774	-4.5188	-4.51633	-4.5996	-4.28273	-4.80599	-4.66604	-4.76719	-5.01445	-4.14522	-4.30399
YHR057C	1.15962	1.23524	0.92546	1.06449	0.68694	1.07488	0.63086	0.64786	0.70805	0.99985	0.82454	0.75755	1.03813	0.9837	0.97318	1.27415	1.19424	1.32401	0.41905	0.75463	0.81197	1.21482	0.72013	0.37487	0.75638	0.64644	0.98597	0.92071	1.29029	0.91148	0.83896	0.7032	1.18271	0.97734	0.84638	0.88469	0.88515	1.20174	1.02166	0.69207	0.9954	1.19615	0.80917	1.15757	0.91642	0.93008	1.34033	1.10972	0.8992
YAL051W	-0.09636	-0.21307	0.01579	0.07057	-0.10122	-0.09239	-0.02459	-0.22361	0.20774	-0.13537	0.1257	0.18395	-0.31972	-0.3307	-0.44192	-0.31785	-0.33443	-0.29523	-0.08394	-0.1521	-0.03633	-0.32887	-0.16438	-0.28089	-0.00134	0.01691	0.2216	0.15434	-0.08829	-0.15735	0.0046	-0.01616	-0.03468	-0.93116	0.22619	0.00651	-0.02019	-0.10479	-0.30989	-0.16507	-0.06297	-0.05708	-0.17591	-0.20553	0.02108	0.04114	-0.05688	0.1521	0.13763
YOL162W	-3.9854	-4.32366	-3.85995	-3.76551	-4.3784	-3.89048	-4.65283	-4.73334	-5.09629	-4.83978	-5.08534	-4.78399	-3.64244	-3.64836	-4.01915	-3.73823	-3.32452	-3.83063	-2.89823	-2.75877	-5.36514	-5.35113	-4.5812	-4.69472	-4.85922	-4.79228	-4.77539	-4.20064	-3.58444	-4.62619	-4.94335	-4.72106	-4.92655	-4.38263	-4.13963	-4.24739	-3.98814	-4.35679	-4.90536	-4.44908	-3.86074	-4.17658	-3.61978	-3.47127	-3.90184	-5.00819	-4.37399	-4.59373	-3.69431
YOR077W	-1.71712	-1.77603	-1.47382	-1.71782	-1.45369	-2.03638	-1.33924	-1.48559	-1.98503	-1.75862	-1.65352	-1.12455	-1.89012	-2.33073	-2.04496	-1.59558	-1.98299	-1.91315	-1.19014	-1.66654	-1.83976	-2.01596	-2.05101	-1.57037	-1.441	-1.82884	-1.42397	-2.38005	-1.12568	-1.42136	-2.19185	-0.70419	-1.12473	-0.67899	-1.60807	-2.11149	-1.21372	-1.0844	-1.70042	-1.78563	-1.43143	-1.65374	-1.21576	-1.14533	-1.92043	-1.67427	-1.42073	-1.50102	-1.3119
YLR234W	-1.42929	-1.30972	-1.41068	-1.42578	-1.43947	-1.44574	-1.14882	-1.23018	-1.2397	-1.15402	-1.02258	-0.78691	-1.30155	-1.68767	-1.58527	-1.38424	-1.57454	-1.83074	-0.99676	-1.35712	-1.04013	-1.31911	-0.97656	-1.51736	-1.10193	-1.40515	-1.53881	-1.42945	-0.93523	-0.89866	-0.71925	-0.97688	-0.98442	-0.8373	-0.95266	-1.59848	-1.01289	-1.14746	-1.37545	-1.35032	-1.12497	-1.36566	-0.80549	-0.42917	-1.55007	-1.38764	-1.08517	-1.44616	-1.49703
YDR198C	-0.45719	-0.80737	-0.44746	-0.55151	-0.43003	-0.52932	-0.455	-0.54245	-0.22513	-0.36197	-0.34179	-0.24916	-0.34686	-0.43544	-0.25078	-0.66896	0.09929	-0.33688	-0.35964	-0.50962	-0.31578	-1.02411	-0.46403	-0.31706	-0.81624	-1.11674	-0.48053	-1.09973	-0.36409	-0.73699	-0.53627	-1.2274	-0.82097	-1.63709	-0.24344	-0.42193	-0.90674	-0.97417	-0.33655	-0.14224	-0.59048	-0.68938	-0.41889	-1.30065	-0.60657	-0.42615	-0.50389	-0.94043	-0.37176
YJR124C	1.25072	1.17376	1.09757	1.13855	1.17418	1.43756	1.48442	0.9689	1.24711	1.61883	1.38417	1.38582	1.48902	1.37123	1.41495	1.28841	1.16863	1.39408	1.28133	0.9607	0.95415	1.13824	1.37727	0.90206	1.0352	0.91444	0.83986	1.15405	0.74377	0.78843	1.89184	0.98676	0.73361	0.65267	1.18743	1.17148	0.87221	0.31119	1.22093	1.17941	1.13862	1.37586	1.14643	0.68098	1.06449	0.75277	1.23314	1.25817	0.82638
YHR107C	1.26473	1.31217	1.36644	1.40547	1.39638	1.28514	1.4784	1.48298	1.33217	1.65696	1.58973	1.48169	1.31271	1.5049	1.47403	1.49129	1.51661	1.63428	1.20642	1.48834	1.2959	1.3874	1.31311	1.5123	1.51027	1.22508	1.18264	1.07679	1.23488	1.27343	0.91429	1.46126	1.45417	2.15249	1.15998	1.48386	1.41516	1.33875	1.45926	1.58819	1.40523	1.40895	1.28427	1.48316	1.48812	1.58273	1.44921	1.49346	1.46679
YLL066C	3.35809	3.48788	3.31964	3.45439	3.47464	3.35599	2.5145	2.68689	2.71481	2.80414	2.65286	2.89001	2.4795	2.48396	2.24323	2.26496	2.20659	2.28273	3.41048	3.52317	2.30124	2.69941	3.30671	3.1892	3.56362	3.54709	2.68665	2.65906	3.24687	3.85239	3.59147	3.81132	3.08971	3.36684	3.13924	3.12894	2.53131	2.40415	3.25107	3.11486	3.05812	3.09849	3.7565	3.83354	3.07364	4.10411	2.84137	3.10799	3.25246
YER112W	1.6075	1.42965	1.57011	1.56181	1.5141	1.40337	1.31542	1.47223	1.57738	1.47079	1.56149	1.23309	1.58171	1.2547	1.46665	1.37602	1.27932	2.16538	1.0095	1.65025	0.78443	1.0383	0.57923	1.55327	1.58852	0.71469	1.69113	1.22861	1.55102	1.6169	0.15133	1.13937	1.58064	0.76667	1.22557	1.64838	1.30574	1.44131	0.9117	1.2047	1.51513	1.45263	1.43562	1.14173	1.67482	1.79856	1.78902	1.46534	1.70942
YLR174W	-2.77543	-2.61464	-2.59519	-2.67552	-2.51779	-3.10295	-2.83138	-2.63802	-2.61368	-2.96568	-2.76488	-2.64337	-2.15897	-2.69726	-2.50047	-2.20042	-2.43278	-2.40764	-2.44663	-2.76929	-2.39144	-2.62782	-2.42884	-3.04504	-2.4179	-3.02355	-2.46571	-2.86832	-2.92139	-2.37988	-2.66949	-2.78827	-2.44002	-2.81678	-2.6319	-3.04408	-2.39885	-2.39205	-2.638	-2.75779	-2.37845	-2.4287	-2.35397	-2.85577	-2.49974	-2.64539	-2.82414	-2.57891	-2.34486
YCL026C-A	-3.89626	-3.60674	-3.33532	-3.63883	-3.1754	-3.80835	-1.88527	-1.94886	-2.10271	-2.39513	-2.17839	-2.02361	-4.12048	-3.89802	-4.31617	-4.46624	-4.47595	-4.00063	-2.11815	-2.43492	-2.55303	-2.93753	-2.36058	-2.86175	-2.3425	-1.81484	-2.81125	-2.92722	-2.36901	-2.26467	-1.35054	-1.07825	-2.82255	-2.48934	-2.38943	-2.88706	-3.21475	-3.40966	-3.09911	-3.77418	-2.55323	-2.52271	-2.19302	-1.75707	-2.72189	-2.14529	-3.07224	-2.91228	-2.41595
YCR018C-A	0.58555	-0.50141	0.18703	0.57462	0.79021	1.42605	-0.93268	-1.40579	-0.67514	-1.01054	-1.2239	-1.37954	0.27769	0.14776	0.45125	0.64331	0.44036	0.94055	-2.45914	-1.66729	-2.59244	-1.56936	-0.63706	-1.44359	-1.7276	-0.74233	-0.03848	0.91508	-3.07211	0.14459	0.64782	-0.10325	-3.92621	-3.24203	-1.09049	-0.25663	-2.74619	-3.70637	-2.61688	-1.83042	-0.38384	0.05479	0.31531	-0.22992	0.60034	0.98264	-0.91327	1.08679	-0.80746
YGR108W	0.23422	0.13232	0.20175	0.21417	0.29845	0.17778	0.14765	-0.39792	0.0016	-0.1348	0.1757	-0.23568	0.09312	0.08619	0.27714	0.37405	0.33666	0.39994	-0.51561	-0.54398	0.33079	0.54933	0.21345	0.03019	0.79641	0.85138	0.63907	0.65318	-0.36341	0.21585	-0.10364	-0.10069	0.02613	-0.24518	-0.09572	0.01416	0.41321	-0.07267	-0.24709	-0.12289	-0.27179	0.18306	-0.38072	-0.63311	0.285	0.46583	0.40127	-0.03248	0.45305
YDR346C	2.49494	2.49821	2.65571	2.51071	2.61162	2.66077	2.61717	2.98752	2.83488	3.02512	2.96896	2.84194	2.27253	2.64361	2.81323	2.42277	2.79515	2.67189	2.48655	2.59933	2.50424	2.17861	2.45178	2.5308	2.43636	2.50419	2.35402	2.0994	2.74902	2.51172	2.25259	2.46607	2.39264	2.57253	2.84211	2.61626	2.49212	2.45497	2.40967	2.38466	2.58669	2.65802	2.56349	2.29652	2.72903	2.7656	2.91829	2.69463	2.68029
YDR091C	2.70375	2.62755	2.66025	2.65057	2.71888	2.78408	3.24138	2.59167	3.15762	3.3491	3.3957	3.11533	3.57141	3.36939	3.45985	3.40758	3.49455	3.45912	2.80375	2.78371	2.83098	2.26255	2.93928	2.82252	2.27521	1.8591	2.60784	2.55149	2.72223	2.72147	3.33324	2.35521	2.31862	1.64736	3.29484	3.04142	2.65028	1.95302	3.06257	3.00756	2.89065	2.95726	2.69148	2.08879	2.87147	2.81704	2.86342	2.95537	2.95167
YKR092C	3.38019	3.04552	3.30105	3.28115	3.41485	3.33215	4.11702	4.25943	3.69727	4.02788	3.94899	3.74782	3.67545	3.56575	3.50038	2.98077	3.50858	3.3486	3.62457	3.68501	3.37121	3.45292	3.51783	3.56173	3.32007	3.15294	3.65672	3.66423	3.38097	2.88895	3.45594	4.01656	3.30878	3.66496	3.08669	3.35135	2.94553	3.48457	3.12109	3.48303	3.56341	3.63203	3.66279	3.53846	3.62503	3.34788	3.79429	3.78803	4.00989
YLR269C	-3.85075	-4.92319	-4.55419	-4.27071	-4.91909	-4.31607	-4.92687	-4.8521	-4.75799	-4.49036	-5.27314	-4.79628	-4.94537	-4.19362	-4.69771	-5.14512	-4.91999	-4.53224	-4.84799	-4.74281	-4.77606	-4.48029	-4.50206	-4.11204	-4.37491	-4.90831	-4.6117	-4.39235	-3.48926	-4.31316	-4.43566	-5.03454	-4.55401	-4.2247	-5.20034	-4.36203	-4.83082	-4.30112	-4.67495	-4.48098	-4.20668	-4.34368	-4.37232	-5.39261	-4.6304	-4.66727	-4.48631	-4.56783	-4.27992
YER165C-A	-4.51177	-4.56899	-4.55323	-3.99958	-4.39169	-4.00623	-4.42052	-4.67454	-4.80702	-4.73725	-4.62485	-4.94626	-4.37864	-4.74134	-4.59019	-4.74169	-4.9497	-4.60977	-4.8071	-4.5227	-4.36281	-4.31287	-4.64954	-4.26617	-4.51476	-3.71139	-3.78755	-4.15759	-4.25205	-4.43849	-4.69408	-3.87875	-3.83297	-3.98202	-4.17693	-3.80482	-4.44524	-3.70389	-4.522	-3.98309	-4.70828	-3.91507	-4.29615	-3.3595	-4.23526	-4.37102	-4.58716	-4.22147	-4.75903
YLR117C	-0.76959	-0.72775	-0.56066	-0.72189	-0.59025	-0.50021	-0.56406	-0.609	-0.7433	-0.51112	-0.68114	-0.54655	-0.71494	-0.92314	-0.56426	-0.5083	-0.66032	-0.68248	-0.92825	-0.55327	-1.13003	-1.1616	-1.21942	-0.68621	-0.59085	-1.06304	-0.46403	-1.26361	-0.48371	-0.72825	-1.55555	-0.71811	-0.87801	-1.0123	-0.8513	-0.65058	-0.79089	-0.56536	-0.79165	-0.84428	-0.43987	-0.56903	-0.51	-0.7193	-0.69554	-0.41704	-0.585	-0.53712	-0.77411
YEL069C	-4.19521	-4.30964	-4.25159	-4.45839	-4.50402	-4.42475	-4.62114	-5.07742	-4.65852	-4.67818	-4.66572	-4.7058	-4.17981	-4.29089	-4.32016	-4.6301	-4.1341	-4.36367	-4.57808	-4.29887	-4.65407	-4.61891	-4.18523	-4.37728	-4.59552	-4.45868	-4.52068	-4.48927	-4.05488	-4.3974	-4.17969	-4.5035	-4.76312	-4.41911	-4.46045	-4.40061	-4.79841	-4.82482	-4.60849	-4.50903	-4.54528	-4.43713	-4.41585	-4.68539	-4.36246	-4.21879	-4.61843	-4.18733	-4.54545
YLR385C	-0.41807	-0.04452	-0.09812	0.06661	-0.11082	0.11686	-0.18958	0.05483	0.14441	0.24701	0.17294	0.49554	-0.15789	-0.06164	-0.06653	0.35485	-0.13188	-0.40759	0.17317	-0.30103	-0.40841	-0.32731	0.0713	-0.18101	-0.3889	-0.09917	-0.18854	-0.16817	-0.04349	-0.05658	0.04033	0.5129	0.03647	0.92318	-0.04225	-0.46403	-0.02382	-0.07654	0.35369	-0.17538	-0.30876	-0.21188	0.01152	0.77694	-0.43815	-0.07432	-0.03434	-0.50631	-0.5884
YBR250W	-3.53306	-3.89743	-3.10377	-3.58694	-3.31032	-3.71488	-3.66661	-3.34577	-3.28602	-3.79167	-3.48051	-3.42401	-4.10045	-4.184	-3.97669	-4.4245	-3.74113	-4.04137	-3.02899	-3.29167	-3.73747	-3.89512	-3.18807	-3.48264	-2.95855	-3.58094	-3.44144	-3.8794	-3.34285	-3.06633	-2.94216	-3.53845	-4.45652	-3.99085	-3.31521	-3.60173	-3.6549	-3.40483	-3.41092	-3.61221	-3.18634	-3.41376	-3.24709	-3.97292	-3.30724	-3.29704	-3.69369	-3.5082	-3.32319
YDR143C	1.27803	1.19105	1.27126	1.16602	0.9476	1.30666	1.0309	1.55482	1.43501	1.19743	1.45587	1.39945	1.59831	1.78215	1.60249	1.3124	1.50635	1.44054	1.53687	1.3558	1.38829	1.10412	1.19479	1.34113	1.06114	1.09999	0.94988	1.53812	1.25018	1.45604	1.37064	1.18246	1.46836	1.20952	1.53548	1.64713	0.98835	1.11157	1.18472	1.50507	1.16126	0.95674	1.46767	1.54256	1.20521	1.17089	1.28934	1.16071	1.38778
YER185W	-3.60544	-3.34462	-3.3741	-3.26354	-3.0884	-3.51976	-3.94251	-4.10711	-3.9875	-4.07183	-3.97656	-3.74544	-3.08818	-3.6029	-3.11567	-3.46013	-3.25078	-3.1529	-3.46035	-3.57646	-4.11181	-3.63428	-2.97971	-3.72156	-3.65879	-3.76675	-3.38192	-3.37076	-3.9118	-3.41997	-4.08731	-4.14726	-4.38971	-2.63482	-3.63242	-3.59302	-3.4084	-3.60978	-2.978	-3.73486	-3.78081	-3.88504	-3.78117	-3.75355	-3.01106	-3.38851	-3.89214	-4.18733	-3.50018
YGL007W	-4.09605	-4.19643	-3.98655	-3.99929	-4.00013	-4.26975	-3.9504	-4.01177	-4.47452	-4.5652	-4.02063	-4.58403	-4.33173	-4.14905	-4.43365	-4.18518	-4.39288	-4.36479	-4.65558	-3.79491	-4.36028	-4.22666	-4.05138	-4.19056	-4.08147	-3.87981	-4.50615	-4.28669	-4.28632	-4.1453	-4.12373	-1.84575	-4.25278	-4.34507	-3.99718	-4.17922	-4.63231	-4.01383	-4.03649	-4.31452	-4.48594	-3.82085	-4.83775	-3.76136	-3.66978	-4.23157	-4.2019	-4.12108	-4.54834
YAL031C	-0.91013	-0.60086	-0.87398	-0.77722	-0.89033	-0.85569	-0.79291	-1.07169	-0.7377	-0.86682	-0.73182	-0.82617	-0.8357	-0.86745	-0.8265	-0.7183	-0.78617	-0.81918	-0.76905	-0.68334	-0.58476	-0.70204	-0.66104	-1.03901	-0.66841	-0.70215	-0.66856	-0.67645	-0.66178	-0.60757	-0.61405	-0.91425	-0.4209	-1.42806	-0.83417	-0.85703	-0.8443	-0.9822	-0.83404	-0.79178	-0.98351	-0.66756	-1.07985	-0.76108	-0.81053	-0.84983	-0.8111	-0.88852	-0.78753
YOL013C	0.02577	0.03846	-0.11107	-0.14429	-0.00145	-0.13642	-0.45066	-0.72356	-0.27214	-0.56747	-0.46118	-0.6666	0.11163	-0.07835	-0.09689	0.20672	-0.02805	0.06674	-0.4135	-0.72651	0.33559	0.11689	-0.07876	-0.71327	0.17727	0.3068	-0.19126	-0.08482	-0.50286	-0.35459	-0.18109	-0.17122	0.14804	0.19032	-0.1482	-0.43716	-0.06305	-0.25141	0.09779	-0.44324	-0.41986	-0.23302	-0.0818	-0.14747	-0.40094	-0.27278	-0.13625	-0.0463	-0.18077
YGR139W	-3.79898	-4.16975	-3.76954	-4.04937	-4.17921	-4.18671	-4.20671	-4.48695	-3.13832	-2.5444	-5.08701	-4.26969	-4.22302	-2.81827	-3.89556	-4.83058	-4.30954	-4.57291	-3.29291	-3.84636	-3.38656	-4.65138	-4.37674	-4.44148	-4.23993	-4.24928	-3.55347	-4.9659	-3.88726	-3.8626	-3.98619	-4.61228	-4.42167	-2.30449	-3.56951	-4.09466	-3.8399	-4.27864	-4.05174	-4.37823	-3.59087	-4.17191	-3.64122	-3.9549	-4.23543	-3.78662	-3.3266	-3.52747	-4.26187
YLR089C	1.66184	1.18708	1.32224	1.44786	1.37504	1.53677	1.04736	0.88288	0.96496	1.27774	1.09303	0.95637	1.86035	1.57086	1.32406	1.78364	1.68672	1.59748	2.03508	1.6516	1.71928	1.70724	1.65681	1.40421	1.34095	1.46602	1.59534	2.45147	1.21285	1.21164	2.40515	0.99486	1.00825	0.64749	2.14094	1.78219	1.29735	1.06247	1.16236	1.67994	1.08111	1.25941	1.17943	1.34179	1.72269	0.91041	1.23368	1.23791	1.18402
YKL155C	-0.49814	-0.66828	-0.52153	-0.64423	-0.32796	-0.47455	-0.08983	-0.11058	-0.01108	0.13586	-0.19345	0.0424	-0.24703	-0.11322	-0.19251	-0.15057	-0.11411	-0.04318	-0.53344	-0.44672	-0.9055	-0.65412	-0.4356	-0.30721	-0.91243	-1.26441	-0.005	-0.50864	-0.50752	-0.69176	-0.65986	0.00317	-0.78899	-0.48661	-0.67595	-0.44961	-0.5744	-0.56839	-0.66601	-0.41429	0.00487	-0.16682	-0.46985	-0.69041	-0.38308	-0.40674	-0.25751	-0.22303	0.02412
YKL222C	-1.38199	-0.93991	-1.17419	-1.14181	-1.20455	-1.12667	-1.32164	-1.05989	-1.14248	-1.19567	-1.22663	-1.09845	-1.53839	-1.63199	-1.44991	-1.14434	-1.35849	-1.55792	-1.33349	-1.47462	-1.31015	-1.6471	-1.48722	-1.45984	-0.829	-1.19171	-1.53637	-1.78203	-0.95607	-1.00072	-0.5046	-1.0205	-1.37244	-1.74207	-1.00395	-1.09426	-1.3577	-1.39157	-1.26383	-1.39158	-1.02312	-0.9914	-0.95784	-0.99391	-1.18804	-1.28064	-0.98719	-1.16065	-1.14644
YGR154C	-2.03282	-1.74622	-2.17589	-1.99999	-1.76356	-2.45525	-1.4263	-1.63985	-1.26874	-1.41628	-1.31507	-1.3045	-1.19163	-1.36386	-1.435	-1.15316	-1.3427	-1.79694	-1.59684	-2.02652	-1.29417	-1.52931	-1.79769	-2.2899	-1.95675	-2.3169	-1.94808	-1.82199	-2.26878	-2.13831	-1.34332	-1.92467	-1.36082	-2.49858	-1.566	-1.92244	-1.7332	-1.66214	-1.46002	-1.90488	-1.46722	-1.56233	-1.93991	-1.61569	-1.46513	-2.00529	-2.03707	-1.8901	-1.9797
YNL277W	-2.2894	-2.30256	-2.03992	-2.11519	-2.14328	-2.5628	-0.28476	-0.07663	-0.16049	-0.24892	-0.1793	-0.3939	-4.01682	-4.01084	-4.26175	-4.39326	-4.14847	-4.37018	0.70138	0.96272	-0.24229	0.25011	0.33751	-0.17169	-0.4542	-0.33509	1.6718	2.11664	0.1689	-2.08211	1.96898	2.34096	1.33682	1.27145	0.83127	0.51283	-0.87629	-0.86412	-1.89398	-1.18925	-0.65383	-1.0025	-1.39678	-1.18206	1.27621	-2.14317	0.22479	-0.60188	-0.9202
YOL061W	2.62999	2.59543	2.31491	2.4524	2.51089	2.53371	2.88338	2.45985	2.94659	3.03546	2.97327	3.01724	3.36838	3.26217	3.02349	3.29574	2.99236	3.13828	2.81032	2.52327	2.98338	2.9772	3.16303	2.61601	2.33679	2.53368	2.42313	3.00495	2.4963	2.66135	3.61963	2.90484	2.73903	2.53408	2.88693	2.74405	2.57198	2.38076	2.79207	2.59218	2.68162	2.70861	2.73883	2.63249	2.55519	2.84242	2.81063	2.56706	2.67973
YDL014W	4.66362	4.66068	5.23618	4.52383	4.31333	4.55132	5.38844	5.27592	5.29688	5.27629	5.46847	5.09815	5.49363	5.36404	5.33828	5.10054	5.9049	5.47385	4.98303	4.85513	4.93773	4.49151	5.16079	5.12741	4.40868	4.31321	4.82875	4.92641	4.7301	4.93026	6.2557	5.10028	4.91185	5.15418	4.79011	4.88311	4.64505	4.72253	5.01433	4.70017	5.45081	5.44923	5.10139	5.02082	5.48863	5.12769	5.46246	5.28818	5.27886
YFR013W	0.24624	0.13232	0.27543	-0.01221	0.12556	0.16723	0.0569	0.06093	0.16095	0.10017	0.1372	-0.03513	-0.17173	-0.10029	-0.07627	-0.1667	0.07526	-0.11895	-0.19682	-0.02469	-0.01647	-0.18411	-0.20138	-0.11184	-0.127	0.00402	-0.05162	-0.18143	-0.07425	-0.3598	-0.4813	-0.15641	0.15567	0.20211	-0.12028	-0.07454	-0.19983	-0.17245	-0.21511	0.02394	-0.0099	-0.07523	0.04135	0.01269	0.23665	-0.08151	-0.03029	-0.20421	0.03936
YCL064C	3.33445	3.37295	3.53395	3.43249	3.41382	3.50328	1.6031	1.29133	1.7528	1.34589	1.79681	1.19059	2.71589	2.89631	2.75079	2.23096	2.45167	2.7008	3.35781	3.77648	3.97541	3.37981	2.40227	2.58052	3.74116	3.3468	4.17617	3.75476	3.34869	3.36348	3.01457	3.17809	2.75378	2.58913	3.97505	3.78276	1.72988	2.18715	1.39385	1.36579	-1.61922	-1.84728	3.50178	3.46212	2.41731	3.53385	1.99655	1.44268	4.14719
YDR493W	-0.25361	-0.1195	-0.04697	-0.16731	-0.39971	0.02585	0.56283	0.56405	0.60791	0.65579	0.50122	0.8293	0.9008	0.90783	1.02366	1.31916	0.89193	1.28309	0.27451	-0.18518	0.39187	0.2614	0.49384	0.4908	-0.28679	-0.03323	0.56302	0.21052	0.14897	0.56726	0.18787	0.88589	0.46636	0.49168	0.17688	0.07944	0.09708	0.21594	0.31541	0.06154	0.00436	0.10403	-0.11838	0.78866	0.0646	0.09535	0.25451	-0.04521	0.63388
YLR345W	-1.4622	-1.36058	-1.33264	-1.5559	-1.42108	-1.55278	-2.22636	-2.04562	-1.72635	-2.27013	-1.90375	-2.29866	-2.53437	-2.35261	-2.18098	-1.89903	-2.09562	-2.17786	-1.63848	-1.75818	-1.42637	-1.20903	-1.71342	-2.12717	-1.17781	-1.44529	-1.12834	-1.22586	-1.91506	-1.91523	-2.20661	-1.54139	-1.4154	-1.74989	-1.88209	-1.83348	-1.26201	-1.00675	-1.73278	-2.11028	-1.42089	-1.60984	-1.77197	-1.09342	-1.59072	-1.71506	-1.65675	-1.1798	-1.38949
YGL022W	3.08589	2.83328	2.78685	2.90222	3.00895	3.00818	2.96231	2.78051	2.9212	3.04057	3.02137	3.07719	3.12143	3.02379	3.00206	3.22849	2.9416	3.19454	3.14039	2.95828	2.85141	3.03448	3.23256	2.8247	3.06703	3.12644	2.75396	3.04832	2.87505	3.04601	3.41657	3.05684	3.05713	3.36526	3.14066	3.01439	2.92353	2.85876	2.86703	2.82968	3.19078	2.98577	3.02791	3.3507	2.95529	2.95003	3.25959	3.09291	2.65879
YLR192C	3.15818	3.27888	3.289	3.22352	3.16877	3.18431	3.85077	4.05872	4.02262	3.71649	3.98159	3.86971	3.52329	3.3891	3.50724	3.46252	3.24975	3.58358	3.32259	3.3578	3.31107	3.25518	3.02597	3.55503	3.64003	3.64141	3.77967	3.45245	3.56833	3.87182	2.81501	3.81163	3.45911	3.12976	3.43158	3.71158	3.55056	3.81275	3.40475	3.45967	3.47225	3.71655	3.91752	3.74467	3.71295	3.92905	3.5713	3.4843	3.99326
YOR265W	0.6532	0.2555	0.57787	0.80922	0.71457	0.54047	0.70541	0.96519	0.81292	0.7952	0.80515	0.69598	1.52419	1.34882	1.3605	1.11189	1.34577	1.48212	0.49065	1.01613	1.16497	1.01975	0.44905	0.47056	0.90674	0.96197	0.83368	0.68077	0.93881	1.14601	-0.41313	0.14495	0.66602	0.97153	0.98965	0.7595	1.16295	0.74886	1.04105	0.79227	0.16507	0.41501	0.59007	0.75341	1.12399	0.83598	1.0552	1.13331	1.16204
YCL019W	2.29548	2.50306	2.31375	2.53209	2.23332	2.42845	0.56324	0.76935	0.78459	0.72711	0.70072	0.94698	0.25745	0.29489	0.17869	0.04551	0.26416	0.04617	3.00627	3.06583	2.10958	2.39855	3.48575	4.03727	3.2821	2.81778	2.67194	1.97903	4.04204	1.42648	0.95271	1.38602	4.5081	4.14474	2.81639	3.20701	3.95514	3.93533	3.90133	4.1439	2.08178	1.59953	3.66883	2.1208	1.18601	1.25449	1.17041	0.61585	1.47939
YDR031W	-1.18299	-1.53423	-1.29954	-1.16899	-1.19023	-1.30416	-0.72406	-0.66919	-1.24454	-1.11129	-1.25988	-1.00386	-0.3575	-0.17442	-0.54456	-0.44735	-0.51509	-0.17773	-1.43981	-1.53928	-1.18337	-0.66294	-1.60738	-1.10008	-1.51671	-1.41809	-0.40102	-0.85733	-1.23476	-1.52385	-1.47428	-1.64866	-1.68566	-2.20728	-1.62787	-1.25485	-1.08047	-0.98847	-1.68222	-1.25012	-0.59965	-0.99334	-1.65223	-2.45371	-1.0724	-1.27384	-1.31579	-0.55693	-0.79628
YOR333C	-4.52504	-4.17359	-4.38154	-4.937	-4.29888	-4.56431	-4.93009	-4.68052	-4.82696	-4.79377	-4.70049	-4.91881	-4.67688	-4.78371	-4.56319	-5.04717	-4.41023	-4.64955	-3.56084	-4.26411	-4.497	-4.8118	-4.72221	-4.71589	-4.4453	-4.54075	-4.07514	-4.3058	-4.27811	-4.43804	-3.72013	-4.80822	-3.90914	-4.49523	-4.1575	-4.71258	-4.68818	-4.68946	-4.50189	-4.71997	-4.35252	-4.58903	-3.68118	-4.5396	-4.20626	-4.50113	-4.54302	-4.46192	-3.91627
YDL190C	1.16301	1.15543	1.02637	1.00433	1.02814	1.24151	0.63665	0.71598	0.87879	0.94736	0.89703	0.66592	1.08145	1.13126	0.97619	0.96044	1.12875	1.05184	0.80887	0.81033	1.04618	1.12676	0.97397	0.84695	1.11695	1.03694	0.67042	1.22369	0.85052	1.20023	1.32396	0.3972	0.6894	0.26083	1.08148	1.05463	0.93351	1.14534	0.93592	0.83904	0.98274	1.24104	0.99443	0.78558	1.03795	1.024	1.1447	1.3004	0.99704
YKR083C	-0.80838	-1.21033	-0.76576	-0.70388	-0.2614	-0.6429	-0.57819	-0.52429	-1.21735	-1.01414	-1.26425	-0.79558	-0.95947	-1.23967	-0.65758	-0.48459	-0.76019	-0.0736	-0.6519	-0.87801	-0.99559	-0.9273	-1.83511	-0.80641	-0.84232	-1.67356	0.06548	-1.00177	-0.65499	-1.03062	-2.01248	-0.72015	-0.4706	-1.09888	-0.68835	-1.09977	-0.57947	-0.53747	-1.78302	-1.40625	-0.86158	-0.92366	-0.48942	-1.23555	-0.89668	-0.6905	-1.11216	-0.78661	-0.58545
YBR141C	-0.45735	-0.69559	-0.592	-0.66438	-0.39727	-0.70051	-0.42318	-0.50934	-0.49643	-0.08899	-0.5183	-0.353	-0.50426	-0.82967	-0.67112	-0.65427	-0.90659	-0.85869	-0.75667	-0.78063	-0.90814	-1.42613	-0.90973	-0.24312	-0.95745	-1.42022	-0.68808	-1.27619	-0.79326	-0.75683	-0.74827	-0.1782	-0.32362	-0.2011	-0.50946	-0.70908	-0.74434	-1.20324	-0.71779	-0.27281	-0.55958	-0.64007	-0.25299	-0.96379	-0.66651	-0.53399	-0.76705	-0.88399	-0.41435
YDR453C	-1.59004	-1.27409	-1.36414	-1.32681	-1.57226	-1.54438	-1.71525	-1.33463	-1.62351	-1.89459	-1.87041	-1.86874	-0.56861	-0.81502	-1.0367	-1.56696	-1.02301	-1.1324	-1.76098	-2.08874	-1.72154	-1.80696	-1.41048	-1.83125	-1.02923	-0.36125	-1.28879	-1.72008	-2.06128	-1.64939	-1.13012	-1.68283	-1.54902	-1.881	-1.92056	-2.01021	-1.64042	-1.41828	-1.57311	-2.46649	-1.76965	-1.61447	-1.50911	-1.61202	-1.98117	-1.77823	-1.85156	-0.4156	-1.64679
YAL008W	-0.40284	-0.16875	-0.35839	-0.09943	-0.41249	-0.18184	-0.97591	-0.91508	-1.01383	-0.98068	-0.98694	-0.8086	-1.58613	-1.40804	-1.27609	-1.32587	-1.53113	-1.57633	-0.33765	-0.6885	0.13515	0.07794	-0.33337	-0.46483	-0.55159	-0.21668	-0.00011	0.10963	-0.56786	-0.66163	-0.61537	-0.4034	-0.38851	-0.45732	-0.98791	-1.31895	0.03373	-0.04174	-0.93684	-0.78986	-0.67521	-0.6073	-0.48145	-0.39193	-0.24034	-0.64405	0.02961	0.04124	-0.14834
YDR490C	-0.7851	-0.41927	-0.8554	-0.65696	-0.6252	-0.62638	-0.91928	-0.59443	-0.48964	-0.64075	-0.70292	-0.54655	-0.76234	-0.70679	-0.73294	-0.43103	-0.55701	-0.82073	-0.83219	-1.10902	-0.41934	-0.39941	-0.58863	-0.89121	-0.60824	-0.40951	-0.50053	-0.48097	-0.66247	-0.72656	-0.86748	-0.81326	-0.09058	0.32093	-0.73163	-0.83119	-0.53142	-0.51706	-0.56702	-0.71761	-0.7164	-0.36667	-0.41481	0.01677	-0.57758	-0.7119	-0.63072	-0.58658	-0.52597
YDR191W	-1.78713	-1.62669	-1.70844	-1.78021	-1.93075	-2.08551	-2.11258	-2.00372	-1.67395	-2.32205	-1.78384	-1.78906	-1.72397	-1.8295	-1.98775	-1.655	-1.93461	-1.73371	-1.95796	-1.76708	-2.04851	-1.86852	-1.5179	-2.1056	-1.77932	-1.90506	-1.99322	-1.83121	-2.15301	-1.5624	-2.07374	-1.19636	-1.16082	-0.67714	-1.79119	-2.11172	-1.98099	-1.83351	-1.79565	-2.31959	-1.86019	-1.77453	-1.95203	-1.55647	-1.97367	-1.73443	-1.89599	-1.918	-1.98253
YER107W-A	-4.72513	-4.43873	-4.63219	-4.73379	-4.28869	-4.43548	-4.96281	-4.55475	-4.87599	-3.84105	-5.00572	-4.55532	-4.65787	-2.45609	-4.67274	-4.93076	-4.37711	-4.73433	-4.65938	-4.60323	-4.63794	-4.97694	-4.50257	-4.58099	-4.87468	-4.85349	-4.71942	-5.19016	-4.83234	-4.33574	-4.70923	-4.65476	-4.91232	-4.62583	-5.0121	-4.37921	-4.67983	-4.97438	-4.77003	-4.45895	-4.82659	-4.79276	-4.57341	-4.22517	-4.47662	-4.74655	-4.51364	-4.46689	-5.09509
YLR459W	1.39316	1.32954	1.02918	1.24521	1.17759	1.31978	0.88885	0.77019	0.59782	1.00693	0.67388	0.15704	1.55782	1.62598	1.32769	1.05021	1.35475	1.55674	1.2812	1.07926	1.00704	1.04063	1.56106	1.29332	1.23154	1.53305	0.8632	1.39506	0.66169	1.00882	2.26467	0.69994	0.26107	0.41351	0.85155	1.02985	0.89103	0.97719	0.94685	0.80751	1.10728	1.049	1.08496	1.13453	0.76161	1.02062	0.50705	0.88154	0.76587
YNL193W	-0.77152	-0.69295	-0.54993	-0.71062	-0.64523	-0.79914	-0.70317	-0.93059	-0.70638	-1.00816	-0.78674	-0.73254	-0.92529	-0.88996	-0.60741	-0.70187	-0.7005	-0.89208	-1.05949	-1.35364	-0.31881	-0.95466	-0.98614	-1.2212	-0.7879	-1.01082	-0.64345	-0.76916	-1.02968	-0.74085	-1.28727	-1.24168	-1.02128	-1.34521	-0.75163	-1.30079	-0.45273	-0.7202	-0.9253	-1.0826	-0.73827	-0.80825	-0.8682	-0.68695	-0.55111	-0.78413	-0.68155	-0.68536	-0.47154
YHR099W	1.45796	1.43127	1.54628	1.4529	1.48486	1.54317	1.39918	1.18423	1.45174	1.35049	1.57292	1.31592	1.32601	1.30736	1.39609	1.24639	1.39062	1.3161	1.33506	1.36957	1.5366	1.17474	1.26755	1.43385	1.34725	1.18581	1.1873	1.56747	1.48072	1.65494	1.40649	1.09501	0.73429	0.80588	1.55862	1.31843	1.22085	1.14534	1.46905	1.55061	1.39236	1.51751	1.51338	0.97921	1.65059	1.51872	1.1839	1.47348	1.13938
YLR360W	-1.09446	-1.05198	-0.82846	-0.90106	-1.06089	-0.92069	-1.09053	-0.87712	-0.93253	-0.94544	-1.02837	-1.30407	-1.02725	-1.17082	-1.14166	-1.15656	-0.82722	-1.03722	-1.15238	-0.95735	-1.15894	-1.32623	-0.93928	-0.83325	-1.12655	-1.32998	-1.47819	-1.2532	-1.11755	-0.9144	-0.89743	-2.6565	-1.11607	-2.29803	-0.97776	-0.91322	-1.31584	-1.56555	-1.1466	-1.02084	-1.02749	-1.06566	-1.28542	-1.49848	-1.09652	-1.03321	-1.20154	-1.15019	-0.76771
YKL070W	-4.69236	-2.61146	-4.16068	-4.99161	-4.24101	-4.24453	-4.57109	-4.0097	-4.18957	-4.36853	-4.09477	-4.33765	-4.97871	-4.59122	-4.41696	-4.69167	-4.65253	-4.40461	-4.2616	-4.09201	-3.56203	-3.30665	-3.7323	-4.26154	-4.05585	-4.38724	-3.80917	-4.03616	-4.46683	-3.94118	-4.12797	-3.43439	-3.83382	-3.78955	-4.06034	-4.38983	-4.77368	-3.97082	-3.75087	-4.38122	-4.01389	-4.46406	-4.55523	-3.82606	-4.4016	-4.30111	-4.47177	-3.7335	-3.75858
YPR170W-B	2.83372	2.64389	2.9912	2.5923	2.5779	3.02793	3.5369	3.22957	3.15087	3.21658	3.20599	3.32653	3.69956	3.80853	3.5007	3.26779	3.35924	3.40789	3.8467	3.28497	3.29653	3.25032	3.71576	3.43269	2.82261	3.50845	2.97767	3.09279	3.06801	2.55253	4.42851	2.26628	2.96071	2.23974	3.18007	3.01631	3.37864	3.63278	2.98394	3.28345	3.21198	3.36989	3.35794	3.31487	2.7453	2.9726	2.96679	3.03013	3.47094
YKL145W-A	2.0872	2.0998	1.60506	1.18748	1.83325	1.66845	1.30039	1.47081	1.54749	2.07261	1.60323	1.42867	0.85694	0.99161	1.01154	0.79197	1.0517	1.23937	1.30739	1.5034	1.17232	1.28912	1.01199	1.35577	2.26113	1.6394	1.50728	1.30007	1.57672	1.51331	1.59914	1.21547	1.63155	0.94546	1.50434	1.95942	1.44871	1.94475	1.24444	1.47994	2.11089	2.22524	1.35464	1.87813	1.455	1.45166	2.41018	1.68338	1.38457
YOR142W	2.64273	2.78887	2.31089	2.50255	2.49812	2.87403	2.54278	2.64351	2.71903	2.71943	2.50088	2.55959	3.33398	3.17329	3.03561	3.13032	3.06519	3.14882	2.76288	2.75566	3.15315	3.39178	3.1064	2.79805	2.90333	3.01244	2.52746	3.41856	2.68451	2.62948	3.55831	2.45937	2.43626	2.70487	2.0724	2.51902	2.76224	2.83531	2.93115	2.63645	3.12113	2.97135	2.25107	2.73766	2.91415	2.60923	2.8451	3.2685	2.90396
YLR430W	1.01999	0.77274	0.82372	0.87528	0.92958	0.87185	0.62859	0.49903	0.63796	0.76859	0.72885	0.7546	0.45447	0.3181	0.3927	0.27825	0.3525	0.29715	0.71646	0.64928	0.53408	0.56804	0.67758	0.35365	0.59368	0.4398	0.37038	0.74126	0.69667	0.73704	0.74474	0.51774	0.35176	0.49861	0.70152	0.49029	0.65077	0.61471	0.87779	0.95563	0.95606	0.92411	1.06616	0.68656	0.4422	0.79626	0.31052	0.54461	0.12932
YDR304C	2.81212	2.87964	2.78073	2.682	2.63565	2.90759	2.3444	2.59707	2.58336	2.46623	2.26325	2.56005	2.95432	3.35102	2.97748	2.93799	3.07959	3.27553	2.90531	2.83837	3.14805	3.17447	3.08072	2.94545	3.07476	3.20274	2.93121	3.05582	3.10889	2.56625	2.84867	2.4566	3.00895	3.01202	2.75781	2.69963	3.04287	3.46947	2.9405	2.90887	2.69915	2.8156	2.52827	2.49518	2.60698	2.7249	3.28161	3.24088	2.78214
YPL020C	-0.56067	-0.81661	-0.3615	-0.42024	-0.38474	-0.70698	-0.47909	-0.57467	-0.8742	-0.87132	-0.76038	-0.61897	-0.6153	-0.93023	-0.70909	-1.04635	-0.85165	-0.58177	-0.56236	-0.11494	-1.13486	-0.92572	-0.83817	-0.81857	-0.68687	-1.07151	-0.88941	-1.14828	-0.43939	-0.6096	-1.0542	-0.35041	-1.23162	-0.63064	-0.78861	-0.75747	-0.86415	-0.82228	-0.21688	-0.55815	-0.18098	-0.56371	-0.39031	-1.33265	-0.72035	-1.00977	-0.97609	-0.66293	-0.7938
YHL023C	-0.29808	-0.42954	-0.2041	-0.33659	-0.30944	-0.36172	-0.39908	-0.62031	-0.59311	-0.67746	-0.50828	-0.50188	-0.6921	-0.67794	-0.59547	-0.63294	-0.52993	-0.64822	-0.80645	-0.74923	-0.67857	-0.8483	-0.42654	-0.29287	-0.57818	-0.92507	-0.35211	-0.71732	-0.51246	-0.46579	-0.50312	-0.30975	-0.51025	-0.5163	-0.19392	-0.35867	-0.48724	-0.59135	-0.49352	-0.2384	-0.4039	-0.39168	-0.27571	-0.71566	-0.50537	-0.65115	-0.51895	-0.49361	-0.28213
YLR165C	-1.74048	-1.73776	-1.33945	-1.40937	-1.59156	-2.04771	-2.18788	-2.26102	-2.28368	-2.81773	-2.2809	-2.54758	-1.9394	-2.01172	-2.03787	-1.72215	-2.03046	-2.23548	-1.58944	-1.63388	-1.82145	-2.14924	-2.21775	-2.07794	-1.41319	-1.63475	-1.91925	-2.47164	-2.05166	-2.05881	-2.70001	-1.31825	-1.84516	-2.15053	-2.52506	-2.80825	-1.81678	-2.3543	-2.33565	-2.40281	-1.87095	-1.9091	-2.19057	-3.06763	-1.56046	-1.7221	-1.63549	-1.61923	-1.75546
YOR283W	0.20042	0.37612	0.52841	0.31955	0.53649	0.24363	0.12113	0.08031	0.22164	0.27206	0.10585	0.32443	0.02893	0.00821	0.10015	0.0138	0.37545	0.54557	0.31499	0.31189	0.22403	-0.54792	-0.0994	0.60006	0.26954	-0.13368	0.14892	-0.37212	0.2733	0.02518	0.0147	-0.06455	0.37693	-0.10292	0.61441	0.45725	0.14634	0.35185	0.38692	0.63779	0.17644	0.16992	0.2363	-0.06028	0.11465	0.17286	0.5207	0.14417	0.21635
YMR052C-A	-3.54776	-4.06859	-3.35952	-3.523	-3.06982	-3.98664	-3.23264	-3.75647	-3.39374	-3.64361	-3.34974	-3.59593	-3.18564	-3.5161	-3.08039	-2.40659	-2.50257	-3.41875	-3.90631	-3.35266	-3.05466	-3.11901	-3.36763	-3.88269	-3.58058	-3.11496	-3.58243	-3.39492	-3.74799	-3.23726	-3.8419	-2.74245	-2.77135	-4.60683	-3.90437	-3.88415	-3.03149	-2.72979	-3.07764	-3.81184	-3.34271	-3.38777	-3.94884	-2.45687	-3.18997	-3.31914	-3.83828	-3.25991	-3.50582
YOR053W	-3.70463	-4.73868	-3.61677	-3.653	-1.92476	-3.76556	-4.15219	-3.87538	-3.57897	-3.6817	-3.7009	-3.31593	-3.56224	-3.55828	-3.79135	-3.11129	-3.75485	-3.80348	-1.89613	-3.44882	-3.85263	-3.53222	-2.91367	-1.67523	-3.62339	-2.88862	-2.78937	-3.30857	-2.23581	-3.75762	-3.21596	-3.93749	-3.85681	-3.39653	-1.37826	-1.73964	-4.03603	-3.7293	-3.11233	-3.13034	-3.09747	-3.65285	-1.28301	-3.75355	-2.36734	-3.42365	-3.71196	-3.38988	-2.43339
YJR054W	-0.51984	-0.42073	-0.45995	-0.45896	-0.33913	-0.45727	-0.17256	-0.45561	-0.35346	-0.33431	-0.38264	-0.32113	-0.34765	-0.56448	-0.20168	-0.21568	-0.12203	-0.01512	-0.28081	-0.06317	-0.21928	-0.36759	-0.09924	-0.30505	0.0478	-0.14168	-0.55892	-0.79995	-0.33327	-0.32418	-0.7949	-0.83631	-0.47703	-0.69317	-0.58579	-0.5557	-0.51278	-0.43565	0.14155	0.20935	-0.41989	-0.37101	-0.62351	-0.24448	-0.51821	-0.45176	-0.38221	-0.40578	-0.52424
YER084W-A	-4.56833	-4.43792	-4.53726	-4.66677	-4.57376	-4.72985	-4.82662	-4.49889	-4.72986	-4.53152	-5.06173	-4.42251	-4.63518	-4.31264	-4.33966	-4.95214	-4.7587	-2.70679	-4.56446	-4.56903	-5.11716	-5.02602	-4.73977	-4.79329	-4.64735	-4.63201	-4.31243	-4.92036	-4.44939	-4.67893	-4.84183	-4.88357	-4.96075	-2.21845	-4.944	-5.15698	-4.81338	-5.14225	-4.96942	-4.4644	-4.45637	-4.5857	-4.86746	-5.02532	-4.54488	-4.58239	-4.0348	-4.56783	-4.84076
YHL005C	-4.03525	-4.21733	-4.57297	-4.84505	-4.13334	-4.36475	-4.48258	-4.58738	-4.76886	-4.65013	-4.68719	-5.05364	-4.34543	-4.69066	-4.8639	-4.83073	-4.66379	-4.96232	-3.83768	-4.04467	-3.98417	-4.97694	-4.34077	-4.43315	-4.29723	-4.31006	-4.53041	-4.33748	-4.32206	-3.96236	-3.91363	-4.94414	-4.74798	-4.62583	-4.22621	-4.26651	-4.85596	-4.2732	-4.17135	-3.63164	-4.116	-4.49082	-3.93924	-4.3623	-4.58005	-4.25898	-4.66279	-4.1663	-3.7437
YMR255W	0.10081	-0.98406	0.22711	-0.02831	0.08463	-0.14378	0.12567	0.16988	-0.52276	-0.27594	-0.48095	-0.50635	-0.09865	-0.45237	-0.33528	-1.07594	-0.18551	-0.34616	0.28634	0.69181	0.01366	-0.00031	-0.64624	0.37386	-0.19901	-0.28316	0.26702	-0.23171	0.35481	-0.09055	-0.65104	-0.96289	-0.16231	-0.56949	0.10214	0.3058	0.33512	0.20795	-0.63995	-0.02672	0.22383	-0.26207	0.20826	-0.66926	0.02505	0.0906	-0.43611	0.03628	0.08998
YDR029W	-4.67352	-4.94455	-4.59613	-4.63774	-4.81516	-4.73716	-5.11227	-4.73343	-5.15176	-4.80122	-4.92251	-4.54608	-4.70326	-4.86906	-4.82346	-5.03777	-4.83917	-4.43306	-4.73195	-4.63899	-4.78403	-4.76701	-4.69702	-4.6313	-4.54528	-4.90645	-4.4775	-4.99615	-4.05344	-5.03662	-4.78742	-4.75024	-5.06817	-4.96074	-4.36023	-4.7902	-4.33184	-4.54119	-4.78658	-4.88664	-4.58258	-4.57236	-4.42678	-5.30142	-4.99989	-4.9811	-5.04929	-4.81871	-5.14313
YPL154C	2.85548	2.73281	2.66492	2.86862	2.7075	2.91078	2.4524	2.63468	2.63171	2.64248	2.28674	2.54681	2.91415	2.79923	2.60976	3.08729	2.89137	2.8091	2.76878	2.94272	3.0754	3.73155	3.4341	2.66537	3.78241	4.03289	3.51662	3.91254	2.96451	3.78002	3.50142	2.8941	2.08128	2.39681	2.49685	2.87175	3.66812	3.61045	3.26135	2.56401	3.58211	3.4605	3.25892	3.13103	3.26163	3.87271	3.91243	4.24222	3.04727
YDR033W	4.59372	4.41637	4.3976	4.33386	4.53399	4.43275	0.39828	-0.24714	-0.06188	0.43753	0.15166	0.16711	3.71131	3.34255	3.12735	3.46107	3.29764	3.16979	4.37228	4.09813	0.48141	0.5387	3.24858	3.08331	4.52313	4.47448	0.82107	1.17459	3.63358	0.41433	2.13125	1.4555	4.2573	3.99862	4.134	3.89266	2.32169	1.36033	2.00987	2.78444	0.16941	0.20276	2.99001	2.62877	4.46993	0.3626	1.07003	1.37547	4.54289
YNL043C	-2.45146	-2.34377	-2.48611	-2.7057	-2.57908	-2.94838	-3.62126	-3.56485	-3.43042	-3.71	-3.87033	-3.49484	-3.75864	-3.82541	-3.93973	-4.38236	-3.86134	-4.40461	-3.53314	-3.00558	-2.51664	-2.70297	-3.80006	-3.66222	-2.56873	-2.91652	-2.74203	-3.17803	-2.58136	-3.07992	-2.44788	-0.5089	-4.21874	-2.59059	-0.83889	-0.8476	-2.90792	-2.57466	-3.20941	-2.83777	-3.7327	-3.51048	-3.17614	-3.75355	-2.74991	-2.95498	-3.89214	-3.72094	-2.98746
YDR253C	-2.88373	-2.75419	-2.50931	-2.58719	-2.56094	-3.1411	-1.73925	-1.6445	-1.96155	-2.28672	-2.04773	-1.90635	-3.20078	-3.59433	-3.27819	-3.68174	-3.6122	-3.2871	-1.64193	-1.45447	-2.34393	-1.55098	-2.22339	-2.11632	-1.96866	-2.43392	-0.78114	-0.86019	-1.82193	-2.52515	-1.44328	-0.25669	-1.27822	-0.7183	-1.38367	-1.55576	-1.97946	-1.87807	-2.70635	-2.85638	-1.60975	-2.05523	-1.91156	-2.20077	-1.10656	-2.59578	-1.48559	-1.84703	-2.07383
YNL014W	-3.00915	-3.04117	-2.77646	-2.91022	-2.80821	-3.29961	-3.08661	-3.12751	-3.08584	-3.3978	-2.89305	-3.22686	-3.65386	-3.82008	-3.61897	-3.8911	-3.51535	-3.75311	-2.85282	-3.11726	-2.92146	-3.2713	-2.90449	-3.29164	-2.80388	-3.15725	-3.06864	-3.11014	-3.26646	-3.17117	-3.30444	-3.58717	-2.8552	-3.26743	-3.17248	-3.25167	-2.97473	-3.05158	-2.90425	-3.07145	-3.03058	-2.94581	-3.01261	-2.98826	-3.02482	-3.11307	-3.24512	-3.00012	-2.88988
YNL241C	2.65628	2.68613	2.44575	2.68181	2.42389	2.65683	2.96647	3.27954	3.17857	3.38216	2.98138	3.40469	2.74391	2.89933	2.27117	2.51355	2.54874	2.68849	3.17273	3.13351	3.1635	3.25389	3.36196	2.65558	3.34498	3.4254	3.50541	4.1391	2.75365	2.80125	5.1312	4.36619	3.0749	3.2434	3.07614	3.3752	3.06179	3.14895	2.95773	2.54681	3.4126	3.47252	3.45412	4.10614	2.98867	2.73323	3.13743	3.23821	2.98846
YAL032C	-0.42784	-0.4943	-0.31832	-0.37608	-0.54577	-0.43907	-0.43457	-0.58748	-0.87104	-0.56553	-0.46757	-0.23046	-0.45335	-0.66019	-0.76292	-0.41017	-0.61162	-0.36625	-0.42507	-0.63197	-0.7513	-0.56427	-0.66888	-0.40828	-0.64478	-0.52802	-0.1639	-0.64354	-0.25208	-0.15167	-0.96671	-0.00598	-0.25909	-0.27663	-0.29818	-0.44338	-0.39481	-0.14745	-0.72926	-0.93625	-0.71837	-0.50324	-0.36534	-0.0776	-0.70263	-0.5931	-0.37164	-0.76231	-0.49155
YEL011W	-2.11226	-1.91384	-2.4324	-1.68262	-2.74165	-2.45243	-2.39342	-1.9117	-2.08868	-1.7166	-1.72994	-2.07285	-1.63904	-1.78908	-1.78035	-1.25996	-2.03046	-2.20101	-2.42194	-1.84826	-0.88911	-0.14453	-1.34731	-1.97349	-1.39252	-0.63501	-1.13942	0.13416	-2.35962	-2.2871	-1.48767	-1.32191	-2.63097	-1.45874	-2.50197	-2.01603	-0.68661	-0.65585	-2.45656	-2.30228	-1.75997	-1.0024	-1.74782	-0.93945	-1.81841	-1.59632	-1.99995	-1.13496	-2.19569
YNL291C	1.09345	0.79373	0.84614	0.64488	0.83765	0.91721	0.64914	0.26846	0.54897	0.74927	0.44642	0.64294	1.58426	1.34694	1.02992	0.81634	1.01521	1.2519	1.10221	1.04888	0.58685	0.56864	1.09325	0.72903	0.64754	0.80365	0.51351	0.53321	0.69905	0.64824	1.29417	0.45381	0.91532	-0.79514	0.82159	0.96768	0.58789	0.66862	0.86272	0.58952	0.51425	0.55779	0.61979	0.57779	0.73641	0.70773	0.74872	0.87609	0.21323
YMR104C	-0.64162	-0.50828	-0.8529	-0.71113	-0.84525	-0.84	-0.81852	-1.08991	-0.64158	-0.74261	-0.57619	-0.89788	-0.90313	-0.91901	-1.03249	-1.20223	-1.13105	-1.19255	-0.86681	-1.12138	-0.76911	-0.67699	-0.83014	-0.90739	-0.86297	-0.87738	-0.82573	-0.52656	-1.34102	-0.45175	-0.61601	-0.77177	-0.79945	-0.80746	-0.66975	-0.5926	-0.80657	-1.06905	-0.81109	-0.94735	-0.74014	-0.92033	-0.80539	-0.76131	-0.7588	-0.49901	-1.32268	-0.96738	-0.37283
YDL140C	3.12606	2.89739	2.89515	2.96912	3.03377	3.04015	3.04544	2.73512	3.02573	3.06166	3.12863	2.98793	2.97309	2.89217	2.87123	2.96095	3.05652	2.82887	3.09463	3.05203	3.14749	3.03099	2.91214	2.66562	3.1193	3.00152	2.75001	3.30707	2.99331	3.26046	3.56098	2.87765	2.49075	2.75787	3.06722	2.9085	3.01657	3.0284	2.8419	2.81787	3.40904	3.41659	3.09644	3.02568	3.1801	3.21447	3.10507	3.37948	2.79769
YLR079W	1.13812	1.01377	0.72022	0.98835	1.02663	0.82912	0.48579	0.62275	0.49969	0.62701	0.38119	0.56573	0.5069	0.3347	-0.05483	-0.20978	0.09826	-0.12801	1.10554	0.89206	0.76531	1.01795	0.68365	1.19685	1.21022	0.77999	1.0968	0.70752	1.14833	0.30521	0.2854	0.42008	1.04561	0.34346	0.73286	1.0502	0.99069	1.02949	0.51826	1.03896	1.2569	1.13425	1.19053	0.4213	0.83538	0.79644	1.2469	1.23875	1.35904
YOR348C	-3.69892	-3.71787	-3.66703	-3.6252	-4.03447	-3.70256	-2.77571	-3.25882	-3.50495	-3.24029	-2.9329	-3.20195	-2.67444	-2.94129	-2.84912	-3.19426	-3.76782	-2.82015	-3.29557	-3.27178	-1.47857	-1.6451	-2.74134	-3.20176	-3.03069	-3.07947	-2.03556	-1.93297	-3.46917	-3.21153	-3.48395	-3.63087	-3.37467	-3.20662	-3.28453	-3.46083	-3.09433	-2.94155	-2.76168	-3.18513	-3.04258	-3.14072	-3.36567	-2.2461	-2.97641	-3.59022	-3.62724	-2.97708	-2.65957
YOR097C	-0.38222	-0.50885	-0.69806	-0.4834	-0.666	-0.43672	-0.98814	-0.85335	-0.70978	-0.88326	-0.69299	-0.93983	-0.27347	-0.32797	-0.17203	-0.04786	-0.39915	-0.23225	-0.9592	-0.72525	-0.47494	-0.07828	-0.92707	-0.92345	-0.52327	-0.17466	-0.48205	-0.64818	-0.99647	-0.77991	-0.99188	-1.03406	-0.62765	-1.05216	-0.90991	-0.73909	-0.73091	-0.34445	-0.35338	-0.54296	-0.61365	-0.49582	-1.00348	-0.54072	-0.64082	-0.94517	-0.63384	-0.57489	-0.36561
Q0143	-2.506	-5.21408	-4.13548	-4.71702	-4.05789	-2.69561	-4.03549	-5.28659	-4.93134	-2.92961	-3.54018	-3.67522	-2.82383	-0.4193	-2.41128	-3.5662	-2.87764	-2.44088	-5.12578	-4.87797	-4.99677	-4.68035	-5.34676	-4.85556	-4.29723	-4.91608	-4.4256	-5.397	-4.40958	-5.01589	-4.75867	-5.23884	-3.99511	-4.21612	-4.7812	-4.93237	-4.97925	-4.84913	-5.36816	-5.03728	-4.3386	-4.35597	-4.31984	-5.47474	-3.49561	-3.48774	-3.28596	-4.61896	-4.70769
YOR072W-B	6.34639	5.58591	5.75491	5.21419	5.95218	6.04854	6.19984	5.64243	5.54405	6.51099	6.01386	5.62965	5.77406	5.77037	5.9727	4.99887	4.84452	4.54694	6.82974	4.88294	7.16885	5.294	4.95616	5.46012	4.7311	4.59435	5.84036	6.22392	3.84684	4.78424	5.75136	6.18483	6.23853	5.86199	5.75449	6.2019	6.04563	5.04814	4.09651	6.23269	5.94041	6.12509	4.84502	4.94543	5.19994	4.90287	3.07472	5.73573	4.81299
YHR103W	0.57204	0.6593	0.68481	0.63024	0.87977	0.72274	0.52644	0.5678	0.72931	0.62913	0.752	0.48926	0.29757	0.4209	0.45413	0.43668	0.57965	0.44552	0.70322	0.80095	0.83148	0.50663	0.32772	0.68895	0.73376	0.28031	0.61577	0.64525	0.71504	0.56826	0.19765	0.42842	0.73855	0.36829	0.65637	0.70245	0.73414	0.6337	0.86426	1.07777	0.46021	0.55951	0.49311	0.47769	0.79613	0.77519	0.64155	0.70328	0.87388
YOL107W	-0.13306	-0.72601	-0.60969	-0.22324	-0.7973	-0.20362	-0.89793	-1.20199	-0.6813	-0.91674	-0.86024	-1.18385	0.4787	0.25211	0.13936	0.3017	0.25966	0.22816	-0.66571	-0.43584	-0.59081	-0.03266	0.01582	-1.0874	-0.53769	0.01691	-0.56299	-0.00099	-0.50599	-0.67191	0.14066	-1.95294	-1.07533	-0.93593	-0.42559	-0.9757	-0.3645	-0.90801	-0.59015	-1.14146	-0.57918	-0.80566	-0.46294	-0.69739	-0.86689	-0.65211	-0.60353	-0.424	-0.69283
YOL126C	2.34163	2.34352	2.08612	2.23085	2.04884	2.24192	-0.92312	-0.89586	-1.11144	-1.02172	-1.28229	-1.0385	0.76872	0.66495	0.64142	0.33847	0.18616	-0.04911	2.09375	2.23299	-0.81718	-0.63804	2.71869	1.96595	2.48269	2.68993	1.92077	2.42304	1.64759	-1.49018	2.67878	2.86884	0.09561	0.94735	2.3517	2.08646	0.37018	0.46108	2.57781	2.36164	-0.13076	-0.10342	-1.15702	-0.59077	2.41428	-1.76323	2.01583	2.07554	1.96389
YHR026W	3.41463	3.21276	3.36367	3.20043	3.26886	3.59201	3.76192	3.77688	3.35169	3.89577	3.68681	3.50114	4.31692	4.36263	4.10967	4.31518	4.21084	4.45458	3.27326	3.69224	3.22384	3.56644	3.75732	3.57025	3.38023	3.95318	3.44639	3.91073	3.31956	3.64286	4.60097	3.82492	3.03316	3.5953	3.06013	3.366	3.57623	3.52172	3.42159	3.50965	3.80565	3.82834	3.2983	3.49041	3.93466	3.44404	3.88908	3.93553	3.25812
YGR028W	-0.58703	-0.39017	-0.52699	-0.46547	-0.57028	-0.57416	-0.30533	0.00031	-0.05782	-0.15822	-0.25683	-0.31211	0.36357	0.20282	0.38314	0.36529	0.47644	0.36488	-0.63421	-0.70853	0.01516	-0.20952	-0.36638	-0.78175	-0.32866	-0.35135	-0.18478	-0.16127	-0.43077	-0.63607	-0.62951	-0.70218	-0.4603	-2.1279	-0.27432	-0.42612	-0.23513	-0.43282	-0.40061	-0.46166	-0.21012	-0.36849	-0.72921	-0.66523	-0.31355	-0.40068	-0.30938	-0.25473	-0.34085
YGL061C	-0.54133	-0.57952	-0.33931	-0.83575	-0.65189	-0.64187	-0.66982	-0.37202	-1.14432	-0.93987	-0.99482	-0.62018	-0.47657	-0.93515	-0.63761	-0.78195	-0.38824	0.36773	-0.48964	-0.80748	-0.92054	-0.66946	-1.31191	-0.42622	-0.54077	-1.29812	-0.18926	-1.20999	-0.20081	-0.82528	-1.82849	-1.37577	-0.46206	-1.4039	-0.9572	-0.62126	-0.58875	-0.34609	-0.83677	-0.73365	-0.61359	-0.87582	-0.496	-0.90043	-0.76354	-0.86755	-0.42689	-1.21066	-0.31255
YMR141W-A	-5.0512	-5.78291	-4.58224	-4.26813	-4.57762	-4.23787	-5.14851	-4.61695	-4.74932	-5.33318	-5.17854	-5.23502	-4.57324	-4.63061	-4.28383	-4.83073	-1.09805	-5.57503	-4.60332	-5.74945	-4.71043	-5.48843	-5.09181	-4.95027	-4.17406	-4.85349	-5.3289	-3.01883	-5.3069	-4.47599	-4.39452	-4.64345	-4.89135	-5.18891	-4.91999	-5.26897	-5.21062	-5.36731	-4.70473	-4.76202	-5.16885	-5.21881	-5.09485	-4.77615	-4.60411	-5.22418	-3.65432	-4.54244	-4.40668
YJL089W	-4.07769	-4.58612	-4.06707	-4.11016	-4.11723	-4.13272	-3.74139	-3.63272	-3.72967	-3.86045	-3.68553	-3.96658	-4.02545	-4.18357	-3.93363	-4.54989	-4.08997	-3.99792	-3.90631	-3.69433	-3.72604	-4.00556	-3.38573	-3.73765	-4.09411	-4.07775	-4.03968	-3.73672	-4.03076	-4.19295	-3.66676	-4.48301	-4.17828	-4.14089	-4.3618	-4.0613	-3.77076	-3.88201	-3.28003	-3.84499	-3.99972	-3.80684	-3.99669	-4.52609	-3.746	-4.18015	-4.23214	-3.85925	-3.64577
YKL116C	-0.0912	-0.04646	-0.29814	0.12863	-0.04746	0.18173	-0.0008	-0.37395	0.08335	0.07637	0.05214	0.04538	0.54211	0.48499	0.54577	0.5024	0.44909	0.31391	0.71722	0.39471	0.37189	0.06755	0.50306	0.29055	0.03488	0.25416	0.02122	-0.0989	0.50446	-0.01602	0.61139	0.15156	0.38103	-0.01722	0.36845	0.21454	0.44704	0.24343	0.60357	0.44574	0.01328	0.21377	0.12348	-0.00749	0.03717	-0.14677	-0.12095	-0.15573	-0.09856
YHR134W	-0.46772	-0.19333	-0.36072	-0.41525	-0.39409	-0.42684	-0.6575	-0.36901	-0.66072	-0.49236	-0.57591	-0.36189	-0.511	-0.55189	-0.71847	-0.90624	-0.72319	-0.49872	-0.43883	-0.48535	-0.81454	-0.55209	-0.88544	-0.03473	-0.4644	-0.49055	-0.63694	-1.05072	-0.81987	-0.97765	-0.61387	-0.01388	-0.30745	0.072	-0.59744	-0.32327	-0.66093	-0.46625	-0.86697	-0.54103	-0.50787	-0.85156	-0.53771	-0.5691	-0.66053	-0.74514	-0.46501	-0.77955	-0.48198
YOR022C	-1.4712	-1.52044	-1.39572	-1.51364	-1.46224	-1.64461	-1.63828	-1.61552	-1.70176	-1.89859	-1.80167	-1.51336	-1.57338	-1.72713	-1.58398	-1.60744	-1.69996	-1.7167	-1.97977	-1.73366	-1.58219	-1.27284	-1.61336	-1.82469	-1.58098	-1.68111	-1.54005	-1.71717	-2.15265	-1.61707	-2.06272	-1.83989	-1.45947	-1.96233	-1.70328	-1.8998	-1.76462	-1.75035	-1.83133	-1.85032	-1.79869	-1.73944	-1.60177	-1.68966	-1.52537	-1.75309	-1.74042	-1.48006	-1.45831
YBR228W	-1.43282	-1.3196	-1.26846	-1.34325	-1.41109	-1.55427	-1.40045	-1.47071	-1.49763	-1.1441	-1.53743	-1.38347	-1.26622	-1.78673	-1.47661	-1.35671	-1.30436	-1.87902	-1.34476	-1.4853	-1.56612	-1.49484	-1.58936	-1.79846	-1.33482	-1.67838	-1.3922	-2.03921	-1.6079	-1.839	-1.58763	-1.36089	-1.02806	-0.50695	-1.7297	-1.82427	-1.3655	-1.34659	-1.59096	-1.8146	-1.25102	-1.37519	-1.15463	-1.11674	-1.49424	-1.61735	-1.46486	-1.37976	-1.27346
YNL320W	0.29066	0.15269	0.20811	0.20598	0.36627	-0.02015	0.04366	-0.2635	-0.53167	-0.07431	-0.13539	-0.19609	0.76296	0.45723	0.37385	0.56303	0.52973	0.3385	0.48754	0.09454	0.41769	0.46249	0.66057	-0.2778	-0.1329	0.30936	-0.03284	0.63795	-0.06058	0.07592	1.15595	-0.10884	-0.4399	0.33943	0.03071	-0.08863	0.07545	-0.24352	0.32777	-0.22252	-0.25167	-0.0702	0.03307	-0.17582	0.03482	-0.09285	-0.03745	0.14271	-0.13057
YGR123C	1.67679	1.90467	1.94769	1.8248	1.87558	2.00444	2.00652	1.64755	2.21892	2.14993	2.16306	2.02315	2.06773	2.15675	2.31464	2.02652	2.08621	2.00646	1.84393	1.71215	2.00682	1.38408	1.57415	1.82976	1.35506	1.26188	1.87724	1.53811	1.76779	1.89085	1.68908	1.75258	1.93738	1.21152	1.87407	1.76231	1.69605	1.54024	1.7354	2.09168	1.76778	2.06843	1.71521	1.63793	1.91184	2.00726	1.91773	1.50933	2.05815
YMR220W	1.04319	1.20276	1.24795	1.06906	1.19883	1.24852	1.7684	1.66338	1.81026	1.95517	2.16307	1.65077	2.07033	2.20471	2.35705	2.5601	2.11078	2.29947	1.19688	1.18789	1.89984	1.44414	1.22594	1.28116	1.25378	1.1075	1.30932	1.44004	1.497	1.66082	1.32904	0.95096	1.33194	1.33836	1.24557	1.17995	1.35958	1.43145	1.40741	1.35805	1.03193	1.43888	1.53885	2.07745	1.60619	1.71077	1.3863	1.3799	1.88815
YBR269C	0.58133	0.87066	0.84214	0.66677	0.40466	0.68336	0.35555	0.38773	0.02694	-0.20587	0.20403	0.18583	0.66461	1.02486	0.60719	0.54255	0.33531	0.59239	0.80028	0.07982	1.47242	1.47498	0.84242	0.42895	1.13607	1.4251	1.22764	1.40512	0.36023	0.47541	0.86457	0.66618	0.89967	1.07996	0.19761	0.03436	1.29892	1.55769	0.78609	0.43419	0.61972	0.38235	0.65357	1.14844	0.45671	0.26884	0.57245	0.47015	0.98299
YMR188C	-0.08824	0.09472	0.19813	0.2023	0.18663	0.20016	0.926	1.21584	0.66805	0.69067	0.39094	0.7158	1.28539	1.10698	1.358	1.461	1.27559	1.74579	0.00588	0.21233	-0.39943	0.2007	-0.06986	0.47787	-0.52507	-0.3605	0.58109	0.1804	-0.20849	0.08371	-0.51858	0.5697	-0.24648	-0.42119	-0.0138	0.2656	-0.02518	0.02332	0.40592	0.17404	0.33437	0.10304	-0.01651	0.01914	0.31281	0.35251	0.23107	0.47293	0.82084
YLR290C	-0.19625	-0.26433	-0.17682	-0.1889	-0.07584	-0.30734	-0.01467	-0.11325	-0.04341	-0.41529	-0.33358	-0.42764	-0.4012	-0.3946	-0.22	-0.36261	-0.4411	-0.37261	-0.22825	-0.27299	0.29995	0.22194	-0.32842	-0.38639	-0.08223	0.16823	0.02666	-0.00845	0.01586	0.17789	-0.66996	-0.45723	-0.42102	-0.53666	-0.40611	-0.63262	0.01311	-0.03136	-0.27263	-0.45274	-0.39466	-0.26338	-0.43132	-0.40049	0.07886	0.28375	-0.35233	0.10457	0.11148
YNL258C	-0.32852	-0.3495	-0.11749	-0.2041	-0.2047	-0.17795	-0.19669	-0.24155	-0.17049	-0.26667	-0.16294	-0.50712	-0.42829	-0.48224	-0.36111	-0.56806	-0.38659	-0.25504	-0.45551	0.02083	-0.14162	-0.34071	-0.4862	-0.28936	-0.18997	-0.39316	-0.42077	-0.51456	-0.215	-0.69662	-0.78236	-1.04565	-0.5916	-0.99924	-0.50599	-0.46989	-0.28393	-0.12129	-0.17753	-0.14543	-0.30149	-0.37105	-0.32825	-0.79571	-0.13762	-0.45458	-0.47426	-0.32591	-0.37063
YNL075W	1.21224	1.33201	1.40215	1.32597	1.35706	1.19189	1.43539	1.49012	1.42709	1.79788	1.49269	1.59116	1.20656	1.63894	1.68021	1.52914	1.67975	1.57408	1.04943	1.26691	0.61311	0.671	0.68758	1.59343	0.88387	0.46593	1.11774	0.73965	1.03127	1.24674	0.70865	1.84047	1.20966	2.03513	0.96793	1.34128	1.24097	0.87333	1.16064	1.43895	1.28951	1.09842	1.33446	0.73885	1.38062	1.42922	1.36012	1.04116	1.55024
YPR159W	2.38993	2.28423	2.13348	2.24075	2.17301	2.3208	2.38468	1.86977	2.33619	2.34456	2.46502	2.31627	2.92494	2.70982	2.47578	2.86157	2.6239	2.66529	2.56595	2.56159	2.70205	2.86256	3.17566	2.783	2.87315	3.10861	2.3578	2.8373	2.13927	2.23057	3.22228	2.11951	2.18585	2.16979	2.5707	2.70506	2.87533	2.71268	2.99216	2.96187	2.7052	2.63845	2.05153	2.21765	2.55432	2.2333	2.82024	2.84716	2.31682
YMR198W	-1.08474	-1.13305	-1.13265	-1.30453	-1.13534	-1.44888	-1.13051	-1.35267	-1.42053	-1.28821	-1.18417	-1.1766	-1.48495	-1.5579	-1.46919	-1.43415	-1.47363	-1.45899	-1.20353	-1.15975	-1.36801	-1.05137	-1.30563	-1.49389	-0.96805	-1.11218	-1.17826	-1.26284	-1.13832	-1.15531	-1.7702	-1.6237	-1.29137	-1.51166	-1.20099	-1.5087	-1.09626	-1.02897	-1.23061	-1.4464	-1.12217	-1.05165	-0.9224	-1.04984	-1.07108	-1.13116	-1.19121	-1.1189	-1.38906
YHR089C	4.28989	4.50333	4.81608	4.32144	4.66554	4.39644	5.04495	5.33783	5.42356	5.20527	5.40719	5.22656	4.89986	5.1176	5.15801	4.82805	4.97069	5.09718	4.61543	4.38829	4.73337	4.22088	4.42633	4.78515	4.36736	4.3259	4.93784	4.35582	4.52024	4.56814	5.18677	5.55039	5.04414	5.72975	4.5493	4.67285	4.36753	4.59226	4.45765	4.44406	4.88003	5.0032	4.47128	5.3602	5.51948	5.2999	5.16999	4.82174	5.26988
YBR190W	-3.64351	-4.19382	-3.77678	-3.74561	-3.62511	-3.97726	-3.97721	-3.68126	-3.33503	-3.9827	-3.51987	-4.63027	-3.80735	-3.89108	-3.45135	-3.90114	-3.69298	-3.60975	-4.21954	-4.10361	-3.47354	-3.65731	-3.68259	-4.20158	-2.99096	-4.17441	-3.98236	-3.73672	-3.90775	-3.52252	-3.53803	-4.41819	-4.32474	-4.40078	-3.44481	-4.57857	-3.77076	-4.0518	-3.80722	-3.93408	-3.15977	-3.82596	-3.51896	-3.09701	-3.6792	-3.87046	-3.73096	-4.10465	-3.97501
YBR194W	-1.3832	-1.58981	-1.12763	-1.06145	-1.28281	-1.1755	-0.94573	-1.4643	-1.00826	-0.76302	-1.28283	-1.09836	-1.68976	-1.45735	-1.56982	-0.95749	-1.36331	-2.44803	-1.3845	-1.70299	-0.98033	-1.06846	-1.89776	-1.94857	-1.61433	-1.72729	-0.97239	-1.12581	-1.79267	-1.55826	-1.86199	-1.30708	-1.47084	-0.42901	-1.31135	-2.15806	-1.10192	-1.65154	-1.64744	-1.67152	-1.51169	-1.47631	-1.54349	-1.14265	-1.235	-1.06304	0.01842	-1.35736	-0.94729
YNR018W	2.4841	2.76213	2.66434	2.64401	2.64749	2.60517	3.18555	3.18091	2.91311	2.96999	2.97852	3.10169	2.88601	3.33473	3.20496	3.21242	2.99157	3.2273	3.19678	2.75211	3.34749	3.06436	3.20467	3.05973	2.57949	2.86015	2.84967	2.56616	3.06758	2.57421	2.6115	3.01182	3.05286	3.05023	2.59028	2.60847	3.13333	2.91563	3.00037	3.21607	2.91252	2.91297	2.90314	3.35063	2.61567	2.63267	3.17394	2.94335	3.43245
YAL044C	2.6611	2.53579	2.63739	2.81782	2.40878	2.47474	2.04382	2.27723	2.1087	2.26378	2.09394	2.25145	3.16535	3.13861	2.78856	3.29408	3.06729	3.29786	1.69128	1.21019	3.02957	3.33028	2.10569	2.88094	3.24125	3.21264	3.25127	3.1209	2.66181	2.60827	3.11662	2.5305	1.7149	1.66693	1.86917	1.93198	3.13513	2.63372	2.81629	3.22276	2.45004	2.80573	2.53233	2.38988	2.08494	2.99844	2.46842	2.76256	3.50648
YKL139W	-0.41889	-0.61489	-0.47296	-0.39019	-0.36123	-0.45525	-0.31002	-0.5785	-0.43745	-0.27572	-0.44407	-0.52294	-0.54534	-0.75603	-0.50488	-0.63479	-0.40512	-0.67128	-0.52137	-0.57395	-0.72465	-0.90082	-1.15542	-0.52428	-0.6074	-1.30863	-0.26499	-1.03015	-0.4595	-0.50362	-1.46054	-0.72885	-0.38433	-0.63734	-0.47788	-0.5276	-0.65235	-0.74371	-0.63469	-0.27109	-0.19916	-0.54216	-0.21798	-1.01886	-0.403	-0.40674	-0.34416	-0.43517	-0.0312
YKL197C	-0.92241	-0.65816	-0.83739	-0.6975	-0.69498	-0.7663	-1.14312	-1.10881	-1.05093	-1.02401	-1.15664	-0.88655	-1.02376	-1.09893	-1.0367	-0.83885	-0.86554	-1.00753	-1.10624	-1.15147	-0.95812	-1.42362	-1.29708	-1.37567	-0.99755	-1.0651	-0.97918	-0.79117	-0.92653	-1.10888	-0.71024	-0.73773	-0.45742	-0.48024	-0.88165	-1.07271	-1.14913	-1.13543	-1.13279	-0.99356	-0.93656	-0.92043	-0.56905	-0.46179	-1.05583	-1.02377	-0.84233	-0.83303	-0.88786
YGR138C	0.77351	0.17583	0.44523	0.52017	0.75049	0.83581	1.16959	0.96615	0.9528	1.21589	1.29636	0.98038	1.17027	1.22655	1.01913	1.16312	0.93703	0.94505	-0.08766	0.34152	1.72927	1.3292	1.10741	0.98186	0.76	1.08585	2.31362	2.28546	-0.52646	-0.21975	1.64165	0.30832	-0.66065	-0.30154	0.21322	0.47346	0.99878	0.55777	1.17168	1.28112	0.81225	0.82242	0.12899	-0.22305	1.48275	0.45115	0.43013	0.7357	1.30137
YHR129C	-1.0442	-0.56129	-0.84249	-0.70854	-0.70677	-0.83115	-1.00707	-0.61222	-0.93979	-1.1426	-1.05623	-0.98316	-1.0419	-1.21399	-0.97732	-0.97323	-0.94652	-1.19489	-0.99907	-1.00421	-1.08003	-1.28848	-1.41879	-1.09467	-0.67581	-1.31037	-1.14019	-1.35485	-1.4154	-0.90775	-1.30595	-0.40168	-0.84898	-0.4518	-0.95266	-0.96607	-1.10026	-0.69166	-0.95852	-0.90625	-0.9301	-1.04705	-1.22321	-1.21183	-1.0042	-1.10842	-0.62831	-1.02315	-0.67094
YLR436C	0.5375	0.5669	0.31479	0.65001	0.33679	0.64005	0.30759	0.44857	0.45028	0.57491	0.59393	0.42442	0.59251	0.65173	0.52615	0.58432	0.59868	0.57938	0.58568	0.55706	0.79864	0.82899	0.91467	0.54599	0.86725	0.92041	0.63201	1.13889	0.35745	0.84226	1.2897	0.97341	0.5396	0.67057	0.67926	0.60197	0.65134	0.54962	0.60512	0.6156	0.57683	0.64089	0.7519	0.57931	0.7913	0.52638	0.66428	0.84907	0.44075
YOR253W	1.27484	1.60192	1.34202	1.26342	1.42357	1.5207	1.41178	1.22473	1.32219	1.34305	1.55451	1.57878	1.09106	1.33588	1.7134	1.66392	1.61147	1.69185	1.63605	1.62869	1.66092	1.52377	1.4353	1.49684	1.37052	0.95148	1.25975	0.94701	1.59988	1.14684	1.0569	2.02145	1.99843	2.01024	1.69171	1.46877	1.32932	1.42719	1.24311	1.67372	1.03091	1.44893	0.90466	1.07658	1.40767	1.51561	1.52367	1.47221	1.71801
YNL268W	2.48184	2.21517	2.15703	2.2839	2.22037	2.43806	2.61455	2.44971	2.53543	2.88149	2.70494	2.85424	2.87732	2.78237	2.7894	2.69473	2.68288	2.75108	2.86722	2.69322	2.54938	2.23639	2.36079	2.34241	2.38334	2.51739	2.37464	2.39931	2.32752	2.33377	3.15338	2.89716	2.56782	2.92708	2.63488	2.72639	2.32575	2.2373	2.26146	2.50132	2.26648	2.17688	2.66209	2.66368	2.27314	2.10481	2.38038	2.08076	2.25055
YIL105C	-0.1932	0.10576	0.06965	-0.0467	-0.11386	-0.14728	-0.14974	-0.36965	0.12698	-0.46288	-0.05301	-0.27474	-0.21251	-0.25697	-0.09488	-0.04359	-0.15519	0.0157	-0.58953	-0.44892	0.08224	-0.10406	-0.47682	-0.2349	-0.10123	-0.37726	0.53871	0.1502	-0.2573	0.1158	-0.64842	0.02691	0.01466	-0.16273	-0.21798	-0.26253	0.14717	-0.00071	-0.2853	-0.49769	-0.20533	0.06353	-0.15655	-0.15179	0.17326	0.20353	0.19569	0.01869	0.36068
YDR403W	-3.60786	-3.66422	-3.34503	-3.65657	-3.37704	-3.57693	-4.00593	-4.17988	-4.21097	-4.49915	-4.22638	-4.14673	-4.20633	-4.0618	-4.08231	-4.43487	-4.31321	-4.13298	-3.45706	-3.39564	-4.27192	-4.47452	-3.35625	-3.78852	-3.86407	-3.75956	-4.20798	-4.05124	-3.98455	-3.42089	-3.27707	-3.96339	-4.66586	-4.31761	-3.91593	-4.23262	-4.54941	-4.12141	-3.94425	-4.30948	-3.98582	-4.46603	-4.07777	-3.46253	-4.53391	-3.59711	-3.94059	-3.85526	-3.64393
YDL029W	2.21009	2.35572	2.30675	2.26855	2.17732	2.35441	1.81166	1.60208	1.86977	2.16325	1.86512	1.89735	1.95891	2.1236	2.12537	2.36279	2.11574	2.3456	2.01843	1.86701	2.33804	2.22566	2.21561	1.77802	2.40666	2.53187	2.13264	2.15983	2.05852	1.69827	2.02671	1.79391	1.94119	2.45882	1.91479	1.84932	2.42256	2.28672	2.20754	2.01018	2.23274	2.39988	1.97055	2.45042	2.3994	2.29191	2.60952	2.38289	2.43342
YOR132W	0.54934	0.58049	0.58332	0.55767	0.40185	0.28014	0.56281	0.2771	0.54769	0.26411	0.47334	0.43198	0.49917	0.25391	0.3454	0.4421	0.38173	0.421	0.37454	0.30168	0.39028	0.59797	0.26943	0.1951	0.75782	0.72565	0.52175	0.44238	0.63623	0.638	0.09185	0.91404	0.4692	0.49538	0.4358	0.53851	0.45658	0.4415	0.62196	0.5696	0.4536	0.49582	0.57652	0.49084	0.33727	0.63546	0.58981	0.51201	0.65846
YPR160C-A	-3.60875	-3.3519	-3.49597	-3.42715	-3.52382	-3.33243	-3.64255	-3.81802	-3.38691	-3.8186	-3.74607	-3.98279	-3.87701	-3.58514	-3.69719	-3.58507	-3.93115	-3.60975	-4.76513	-3.56971	-4.86548	-3.7195	-3.76583	-3.82214	-4.55291	-4.02567	-4.44421	-3.5481	-3.61705	-3.45671	-4.7197	-4.42839	-3.38611	-4.2896	-3.51687	-3.70851	-3.71593	-3.97082	-3.55428	-3.70932	-3.25539	-3.77103	-3.51896	-3.57413	-3.69625	-3.52801	-3.74899	-4.77837	-4.39028
YCL026C-B	-1.75077	-1.1341	-1.55436	-1.77684	-1.93078	-1.91037	0.58665	0.55722	0.59875	0.63792	0.60868	0.60374	-2.87043	-3.02322	-2.8259	-3.15238	-3.16637	-2.90288	1.06657	0.21266	0.36608	0.14406	1.33657	1.25314	0.85751	1.22539	1.58491	1.81965	1.2796	0.53245	2.39903	2.20859	-0.6362	-0.2341	1.09522	0.92209	-0.90388	-0.74244	-1.0203	-1.01695	-0.13767	-0.07523	1.1675	1.67687	-1.33474	0.98343	0.30028	-0.15136	0.94114
YPR092W	-5.08317	-4.99176	-4.59283	-5.18268	-4.99988	-4.41651	-5.56046	-4.82196	-4.90951	-4.92558	-5.29477	-4.53778	-4.96429	-4.63061	-4.88105	-4.1854	-5.14107	-5.147	-5.92677	-4.44325	-5.4514	-4.81302	-4.34077	-4.71253	-5.00796	-4.58714	-5.06267	-4.59942	-5.44743	-4.80502	-5.68185	-4.87163	-5.26878	-5.06648	-5.38141	-5.26897	-5.49331	-4.5124	-4.75278	-5.31832	-5.16885	-4.54511	-5.31201	-3.936	-4.78331	-4.852	-4.86694	-3.90675	-4.38136
YDR525W-A	1.53423	1.17752	1.13128	1.27677	1.10252	1.54578	0.62861	0.96232	0.57828	0.77258	0.32855	0.34148	1.4317	1.51214	1.02659	0.80311	1.37547	1.09402	1.35422	1.51595	0.99264	1.66738	1.32311	0.45891	1.07605	1.89732	0.26816	1.74846	0.94477	0.73907	2.13151	1.76491	-0.50023	0.71604	1.09144	1.18556	1.13695	1.10836	1.40336	1.20761	1.22124	0.77922	0.77002	0.24944	0.75811	0.46943	0.88438	1.12991	0.84968
YPL255W	-0.6276	-0.7687	-0.72201	-0.70023	-0.53215	-0.83375	-0.69952	-0.98551	-0.97135	-0.83364	-0.8691	-0.81446	-0.9602	-0.93682	-1.03877	-0.8612	-1.03666	-0.82973	-0.91965	-0.78051	-0.98038	-0.9616	-1.3362	-0.82322	-0.53104	-1.16056	-0.52996	-1.24093	-0.83684	0.26844	-1.77339	-0.84245	-0.36916	-0.00049	-1.03867	-1.13776	-0.59546	-0.58847	-0.92657	-1.08018	-0.76758	-0.85156	-0.91234	-1.15639	-0.84039	0.34197	-0.69439	-0.78661	-0.53757
YEL012W	-1.4325	-0.98741	-1.16626	-1.17791	-1.13526	-1.07725	-1.50405	-1.11353	-1.3342	-1.76498	-1.52693	-1.4095	-1.87193	-2.09319	-1.89659	-1.33393	-1.86007	-1.66792	-1.47248	-1.39533	-1.50995	-0.87558	-1.79728	-1.49845	-0.72531	-0.69247	-0.9567	-1.32266	-1.22871	-1.33152	-2.53087	-0.95651	-1.11956	-0.38009	-1.72982	-1.59971	-0.59422	-0.24222	-1.19886	-1.76463	-1.17937	-1.17492	-1.09624	-0.37467	-1.09402	-1.07018	-1.11879	-1.11621	-1.04565
YOR192C	-2.1045	-2.62571	-2.41026	-2.27526	-2.25904	-2.22677	-2.92851	-2.89585	-2.92716	-2.9277	-2.87114	-2.9888	-2.82189	-3.14406	-3.05467	-2.51183	-3.08519	-3.02869	-2.40367	-2.22752	-2.99996	-3.00646	-2.12428	-2.65118	-2.74274	-2.84864	-2.62919	-2.44092	-2.88449	-3.02609	-2.30036	-3.60862	-3.21768	-3.27631	-2.33747	-2.35288	-2.48747	-2.90805	-2.91993	-2.55374	-2.39186	-2.55747	-2.7575	-2.78891	-2.43165	-2.97458	-3.01574	-2.37045	-3.14735
YGL229C	-1.26715	-1.26962	-1.34639	-1.31785	-1.43244	-1.34106	-2.25797	-2.09522	-1.93152	-2.46559	-1.99252	-2.34868	-2.06886	-2.62541	-2.53173	-2.27139	-2.57031	-2.69698	-1.87404	-2.16519	-2.06818	-2.04186	-1.32733	-2.23917	-1.78259	-1.82053	-1.84281	-1.58494	-1.9785	-1.55684	-0.69415	-2.20595	-1.83193	-2.04907	-1.46837	-2.07987	-1.86217	-2.11449	-2.39934	-2.95415	-1.7488	-1.48139	-1.57206	-1.22425	-1.77842	-1.73267	-1.75404	-1.32798	-1.33369
YER065C	-1.99235	-1.47495	-1.75886	-1.63052	-1.95033	-2.00081	-1.97641	-2.08663	-1.95673	-2.18893	-1.76033	-1.75458	-2.5009	-2.66355	-2.31941	-2.18661	-2.38036	-2.41073	-1.67172	-1.97301	-1.52175	-1.75596	-1.63178	-1.97607	-1.8037	-2.06235	-1.46527	-1.83376	-1.67099	-1.87455	-2.24135	-1.63459	-1.1869	-0.96909	-1.84231	-2.1646	-1.62053	-1.25135	-1.84049	-2.13452	-1.94536	-1.96915	-1.88976	-1.36923	-1.39812	-1.73828	-1.78454	-1.86458	-1.7176
YPR194C	-2.64961	-2.66876	-2.44003	-2.46493	-2.52359	-2.69561	-3.40251	-3.77151	-3.39012	-3.83045	-3.11366	-3.99861	-4.40349	-4.59122	-4.66017	-4.79096	-4.60657	-4.47221	-3.43917	-3.31925	-4.12063	-3.58888	-2.22339	-1.92796	-4.01819	-3.99331	-3.91356	-2.79778	-2.80119	-2.67874	-1.91874	-3.08729	-3.59538	-3.51887	-3.08854	-3.05112	-3.85321	-3.78781	-3.39893	-3.44031	-3.06181	-2.4543	-2.85046	-2.5133	-1.31581	-2.91616	-3.73729	-4.23103	-2.12009
YOL005C	2.66423	2.79296	3.0213	2.9305	2.66574	2.89855	3.01187	3.57576	3.25274	2.67057	3.01581	2.96272	3.29481	3.73102	3.21925	3.09264	3.06367	2.87088	3.10668	2.69015	3.64959	3.55654	2.96841	3.32194	3.26297	3.4308	3.23452	2.99765	2.85694	2.91228	2.79884	4.11401	3.71597	3.74672	2.88435	2.9457	3.28168	3.49171	3.24229	3.23306	2.97764	2.98076	3.09258	3.68845	3.03635	3.21349	3.31069	2.92972	3.47117
YML052W	2.82884	2.69079	2.22692	2.40338	2.36038	2.63861	3.24034	2.95761	2.85115	3.14121	2.99818	2.99064	4.0109	4.00983	3.62162	3.83662	3.72713	4.18737	2.95092	2.98972	3.25992	3.64186	3.59155	2.98063	3.13719	3.31498	2.86873	3.70173	2.78863	2.82209	3.42629	3.03237	3.28057	3.30642	2.536	2.5413	3.19711	3.14719	3.26072	3.152	2.86423	2.7117	2.62302	2.90416	3.04713	2.80164	2.80466	3.00562	2.51658
YML064C	0.46503	0.43214	0.74116	0.37637	0.44362	0.41214	0.2777	0.29963	0.25713	0.35823	0.24122	0.28495	0.41495	0.47167	0.36539	-0.06514	0.42947	0.23084	0.52854	0.57368	0.3436	0.5814	-0.17932	0.14558	0.20045	0.16263	0.09936	-0.27007	0.59908	0.69625	-0.34613	-0.26268	0.26271	-0.92631	-0.18749	0.04244	0.25849	0.08305	0.21177	0.09339	-0.08628	0.12687	0.89942	0.46177	-0.07006	0.7811	0.00319	-0.05468	0.77839
YHL019C	-0.74478	-0.92485	-0.87011	-0.81288	-0.70674	-0.88585	-1.1589	-0.88301	-1.21713	-1.2585	-1.03245	-0.99179	-1.06615	-1.24532	-1.28442	-1.14404	-1.31723	-1.1822	-1.17877	-0.95171	-1.35234	-0.86119	-1.27195	-1.12412	-0.91872	-0.87703	-1.05021	-0.71723	-0.97957	-1.08494	-1.62267	-0.9232	-0.94406	-0.70272	-1.07259	-1.02087	-0.83445	-0.73124	-1.13661	-1.10375	-0.74067	-0.88183	-0.81331	-0.86528	-1.08593	-1.10771	-0.9021	-0.85627	-1.16158
YBR167C	-0.81976	-1.09731	-0.70649	-0.91388	-0.76501	-0.88278	-0.65106	-0.60193	-0.91221	-0.71532	-0.93244	-0.52659	-0.50198	-0.65738	-0.49557	-0.4913	-0.49441	-0.09892	-0.40781	-0.59873	-0.91534	-0.93307	-1.16043	-0.63937	-0.78117	-1.12673	-0.38264	-1.0813	-0.78945	-0.85839	-1.08741	-1.24827	-0.50023	-1.6906	-0.80702	-0.5728	-0.41008	-0.47362	-0.65178	-0.60801	-0.96422	-0.96249	-0.64574	-1.18949	-0.67797	-0.34808	-0.78641	-1.09716	-0.53824
YHL046C	-0.64952	-0.95022	-0.62446	-0.80384	-1.00482	-0.82431	-1.85958	-1.39973	-1.89876	-1.95737	-1.89634	-2.15613	0.15504	-0.04238	-0.15887	-0.06449	-0.17562	-0.09548	-1.16138	-0.45881	-1.64796	-1.14874	-1.12223	-0.88668	-0.70816	-0.24062	-2.08033	-1.91372	-0.93805	-0.65206	-0.9078	-1.04019	-0.52855	-0.67537	-0.92625	-0.79041	-2.29968	-1.69654	-0.69074	-1.46126	-1.77594	-2.16836	-0.65895	-1.17207	-1.65257	-1.15749	-2.58163	-1.3289	-1.45844
YFL016C	0.79103	0.92485	0.576	0.91768	0.72867	0.57487	1.01633	0.99226	0.99861	1.07907	1.08014	1.33147	1.04362	0.4607	0.57045	0.69713	0.41984	0.65668	0.6822	0.85315	0.62891	1.07074	1.16462	0.40868	1.07307	0.86923	1.23041	1.26113	0.64462	1.09867	1.22901	1.41478	0.43125	1.21411	0.83914	1.07995	0.73187	0.56324	1.26907	0.47914	1.5391	1.22013	1.16077	1.04496	0.80398	0.81342	0.94283	1.15038	0.80464
YPR176C	0.66394	0.52443	0.41936	0.65748	0.4711	0.56584	0.38759	0.52339	0.64531	0.70877	0.35934	0.49026	1.17247	1.11931	0.68184	0.82271	1.00791	0.83101	0.57306	0.59169	0.76608	1.06818	0.81283	0.23646	0.31303	0.90237	0.12924	1.01741	0.08239	0.44222	1.73358	0.38727	0.2334	0.50179	0.41836	0.30235	0.64973	0.24208	0.71114	0.39104	0.49299	0.27116	0.61573	0.54894	0.44368	0.08886	0.35156	0.66454	0.44096
YLR383W	-0.8079	-0.99804	-0.60929	-0.94784	-0.68958	-1.06162	-0.80151	-0.51994	-0.96062	-0.84107	-0.83501	-0.73802	-1.45624	-1.73759	-1.26579	-1.46504	-1.4473	-1.34403	-1.07666	-0.87405	-1.41853	-1.17821	-1.52966	-1.16979	-0.41329	-1.03445	-1.08231	-1.24724	-0.82226	-0.76443	-1.71046	-0.76255	-1.30818	-0.9856	-0.92103	-1.02375	-0.81091	-0.67752	-0.87761	-1.00257	-0.67394	-0.92815	-0.64491	-1.12864	-0.90375	-0.99631	-1.0299	-0.79233	-1.2019
YDR140W	0.72116	0.63548	0.62345	0.57557	0.64445	0.61628	0.60528	0.87899	0.76603	0.4822	0.69968	0.65861	1.05123	0.97967	0.99618	0.46021	0.98943	0.79414	1.00621	0.61175	1.06303	0.91292	0.55404	0.86354	0.56523	0.77653	0.64983	0.49379	1.17688	0.85227	0.90293	0.25117	0.59789	-0.1545	0.86248	0.67981	0.57145	0.95322	0.56053	1.07301	0.51169	0.62793	0.72403	0.59868	0.81904	0.79036	0.47493	0.60468	1.14598
YJL062W	0.8959	0.79627	0.55966	0.77543	0.62888	0.98009	0.63514	0.3925	0.5196	0.64018	0.59068	0.5464	1.46812	1.2573	1.10279	1.13185	1.23201	1.27283	0.74746	0.68445	1.04495	1.13556	1.31257	0.55197	0.90883	1.38863	0.58787	1.29739	0.75023	0.71943	1.75657	0.46103	0.6238	0.84563	0.7039	0.76989	1.02041	0.8946	0.90332	0.68315	0.73069	0.6847	0.69961	0.82248	0.66142	0.44995	0.9446	1.0388	0.374
YNL252C	0.05352	0.00135	-0.00543	-0.16853	0.24786	0.03421	1.2106	1.12203	1.02675	1.02576	0.94914	1.12529	1.08499	1.24742	1.33925	1.42231	1.36947	1.62633	0.42856	0.48786	0.33155	0.30681	0.72761	0.70645	-2e-05	-0.24001	0.90661	0.33608	0.24469	0.17864	0.30207	1.30371	0.49047	0.59823	0.38562	0.53649	0.29943	0.15689	0.82586	0.80789	0.77734	0.68813	0.23911	0.10708	0.54864	0.5708	0.85229	0.46637	0.75909
YLR048W	6.66182	6.54409	6.91972	6.42091	6.61992	6.53574	6.58937	6.2683	6.51118	6.13619	6.61083	6.25993	6.75144	6.37284	6.85126	6.29325	6.49016	6.56321	6.79293	6.53066	6.66274	6.26524	6.76802	6.11137	5.7725	6.17812	6.58994	6.79061	6.95248	6.4088	7.17874	6.32984	6.20073	6.68124	6.86078	6.41769	5.99109	5.88373	6.76221	5.63384	6.69044	6.5006	6.56231	6.50617	7.05907	6.43745	6.57466	6.6483	6.75219
YGR282C	4.71813	4.55925	4.32202	4.37872	4.22647	4.44493	4.81636	4.47332	4.74257	4.90084	4.82327	4.8773	5.02404	4.79084	4.63942	4.94498	4.88136	4.8699	4.53512	4.3252	4.53187	4.70394	4.8695	4.23806	4.49402	4.92485	4.77072	5.42668	4.2318	4.81588	5.6253	4.88884	4.48697	4.336	4.87088	4.68743	4.41391	4.3733	4.76317	4.17474	4.82336	4.93834	4.61637	5.38078	5.27856	4.9541	5.1672	5.00905	4.81523
YEL033W	4.52985	3.25272	4.97332	4.13815	3.75644	4.79528	3.60374	5.09913	4.78553	3.67168	4.19632	3.07089	5.09111	5.42458	5.32944	4.25552	4.6361	4.71525	3.41283	5.05924	3.49923	3.97012	2.09022	3.92583	2.96424	3.24432	3.98608	5.0599	3.00814	4.53005	4.25656	-1.89696	1.09614	-1.89054	3.76678	4.71501	1.60526	2.97044	2.28128	4.25065	4.24547	3.45756	3.80394	1.27247	4.16243	4.47938	3.63056	4.56309	4.79906
YMR196W	-1.56724	-1.55794	-1.67503	-1.60783	-1.85149	-1.95433	-2.31167	-1.99096	-2.09492	-2.14505	-1.52354	-2.00107	-2.27533	-2.64108	-2.33003	-2.45849	-2.34991	-2.76804	-1.86351	-1.97989	-1.35473	-0.86434	-0.99835	-1.67224	-0.86704	-0.71113	-0.92085	-0.84726	-2.27146	-2.2043	-1.98853	-1.60719	-1.66696	-1.5615	-2.15866	-1.94266	-0.82089	-0.76556	-1.59308	-1.4294	-1.40294	-1.36174	-1.9467	-1.47638	-0.70371	-1.91457	-0.42689	0.63345	-1.78946
YOR205C	-0.33726	-0.11329	-0.03393	-0.17601	-0.19543	-0.08724	0.08513	0.49295	0.45688	0.36772	0.1844	0.41551	0.244	0.69213	0.41981	0.33627	0.55293	0.21862	0.01947	-0.03926	0.12289	0.01781	0.13825	0.26698	-0.32363	-0.35017	0.11735	-0.45439	-0.15249	0.06385	0.02397	0.18873	0.10198	-0.06011	-0.00582	0.27404	-0.50966	-0.20788	-0.05182	0.34248	0.01629	-0.2411	0.01299	-0.21047	-0.01495	0.01501	-0.13306	0.07258	0.11081
YBR188C	0.1068	0.03686	0.39123	0.05182	0.12249	-0.18488	-0.01079	0.72333	0.07023	0.01717	0.12223	0.07634	-0.23962	-0.0737	-0.34393	-0.74632	0.27706	-0.61412	-0.16267	0.21269	-0.06406	0.588	0.10185	0.46438	0.39415	0.59323	0.67165	0.23812	0.54724	0.05151	-0.56404	-0.42612	-0.11083	-0.36605	-0.37788	0.12045	0.34675	0.76694	-0.17467	0.22646	0.23568	-0.12935	0.57063	0.09189	0.47298	-0.00734	0.16546	0.3647	0.24527
YER056C	3.60163	3.47286	3.28641	3.30588	3.41109	3.59221	3.84895	3.4627	3.86442	4.15923	4.02212	3.99578	4.24438	3.88335	4.06489	3.95919	3.99328	4.02054	4.24383	3.87309	3.67447	3.49605	3.37157	3.80985	3.09086	3.24991	3.86232	3.72279	3.25091	3.02296	4.81211	3.77236	3.62921	3.51945	3.71273	3.8693	3.6648	3.50061	3.48782	4.05968	4.2051	3.65902	3.22997	2.80599	3.95919	3.30119	3.94995	3.69021	3.52639
YLR299W	-0.86154	-0.80854	-1.16666	-1.02984	-1.14889	-1.20207	-0.5897	-0.2754	-0.38174	-0.35997	-0.55558	-0.25605	-1.97254	-2.29898	-2.11671	-1.51797	-2.16219	-2.21912	-0.10729	-0.20723	0.0691	0.26086	-0.95208	-1.86799	-1.17789	-0.67019	0.09465	0.33232	-0.11586	0.07149	-0.86016	-0.8725	-1.11278	-0.52371	-1.59317	-1.81836	-1.16426	-1.1951	-1.42009	-2.01161	-1.20334	-1.15444	-0.24541	0.10327	0.07728	-0.32172	0.25367	0.43644	-0.19597
YHR178W	-1.6397	-1.19109	-1.41273	-1.42109	-1.47167	-1.34218	-1.14479	-1.26412	-1.41868	-1.50859	-1.18411	-1.25123	-1.1591	-1.14982	-1.25545	-1.25097	-0.99488	-1.23016	-1.67323	-1.89853	-1.21282	-1.56408	-1.54674	-2.06351	-1.40151	-1.50517	-1.5001	-1.42834	-1.72559	-1.29473	-1.14436	-1.00729	-1.20012	-1.0543	-1.13034	-1.55897	-1.37482	-1.41451	-1.57708	-1.84321	-1.44378	-1.41302	-1.20262	-1.01916	-1.35796	-1.4142	-1.59672	-1.61962	-1.47117
YOR195W	-0.04934	-0.46811	0.24129	-0.25391	0.27425	-0.30976	-0.19894	0.06457	-0.34177	-0.69443	-0.46123	-0.24069	-0.85681	-0.95695	-0.65594	-0.9041	-0.61206	-0.41432	-0.67835	-0.06878	-1.12937	-0.63258	-1.43389	-0.40152	-0.06228	-0.76497	-0.31269	-0.60759	-0.16445	-0.34254	-1.6861	-0.69802	-1.02357	-0.47459	-0.41093	-0.33472	-0.35308	-0.42729	-0.81851	-0.55972	0.11205	-0.28035	0.03239	-0.73651	-0.14128	-0.12829	-0.14223	-0.14351	-0.46644
YER114C	1.00275	1.04175	1.02368	1.02011	1.15401	1.09844	0.96491	0.91888	0.93952	0.87754	1.01616	0.94366	1.02629	1.15311	1.18168	0.95595	1.20108	1.17773	0.95631	0.85041	1.06997	0.95763	0.72672	0.62702	1.11077	0.94356	0.96119	1.068	1.17428	0.75665	0.68551	0.72481	0.88354	0.6433	0.86278	0.84305	0.8273	0.85098	0.92479	1.1027	0.98523	0.94831	0.97842	0.85634	1.00618	0.93022	1.08443	0.94513	0.92947
YOR192C-C	0.39115	0.00889	0.65911	0.31344	0.21993	0.6845	-4.3143	-4.26628	-4.14491	-4.49055	-3.2593	-4.36805	-1.64122	-2.04772	-1.29247	-2.18613	-2.48508	-2.14456	0.78515	2.31843	-3.7247	-3.82161	1.1719	2.19239	-1.83736	-1.50977	0.95712	0.26861	1.52464	-2.77364	-2.55015	-2.53101	-2.97997	-2.54364	0.21776	1.15624	2.35434	2.2532	-1.18624	-1.12555	0.68693	-0.45672	2.5928	-0.68261	-0.86838	-2.61856	-4.10311	-3.08419	-2.30835
YJL191W	6.25386	5.43894	6.21872	5.04401	5.95829	5.4364	5.85562	5.59702	5.89119	5.74787	5.74039	5.43721	6.46246	5.93005	6.34303	5.67975	6.18809	6.07937	5.18604	5.41105	4.95769	4.96237	5.34427	5.12165	4.83031	5.25017	5.45903	5.95969	5.09605	6.1637	6.33874	5.36042	4.90075	5.10431	5.3369	5.6777	4.68507	4.87203	5.09612	5.08657	5.13584	5.34101	5.45971	5.44622	6.01664	6.16161	5.4765	6.13552	5.46676
YGL258W	-3.79623	-3.82303	-3.38019	-3.17615	-2.96267	-3.56355	-3.32994	-4.75044	-3.93936	-3.96827	-4.20355	-4.53778	-3.20078	-3.52474	-3.68656	-4.61024	-1.91403	-4.4852	-3.78848	-3.5983	-5.53393	-4.0513	-3.38573	-3.45528	-3.93411	-3.24716	-4.3368	-3.90183	-4.7752	-3.17117	-3.8419	-4.10566	-4.76312	-4.68204	-4.67024	-3.7411	-4.4316	-3.69498	-4.06744	-3.80525	-4.32258	-3.22326	-4.3491	-4.42767	-3.82073	-3.46866	-3.86015	-3.29082	-3.70113
YIL002C	-0.22177	-0.05784	-0.0264	-0.0317	-0.00799	-0.0201	-0.25209	-0.35644	-0.01574	-0.20249	-0.0498	-0.15007	-0.24215	-0.41978	-0.22243	-0.08293	-0.20383	-0.22583	-0.34258	-0.28176	-0.23827	-0.17384	-0.05528	-0.52569	-0.14586	-0.37599	-0.09059	-0.1664	-0.05975	0.15418	-0.30836	-0.28252	-0.2614	-0.29686	0.02898	-0.28973	-0.19697	-0.33588	0.03905	-0.18407	-0.22344	-0.07461	-0.20346	-0.3801	-0.21297	-0.17568	-0.15857	-0.04987	-0.11052
YDR518W	0.49065	0.46054	0.33467	0.23777	0.18278	0.26705	-0.22334	-0.30364	-0.08952	-0.24248	-0.00569	-0.41424	0.05015	-0.09533	-0.22141	-0.10156	0.12947	0.00044	0.73993	0.54742	-0.20853	-0.35051	0.78344	0.07082	1.07972	0.85646	-0.7429	-0.32151	0.52495	0.2318	0.81464	-0.1858	0.65301	0.45454	1.01426	1.03974	0.42073	0.16627	0.99069	0.1653	0.17774	0.60762	0.05464	0.15063	-0.18865	-0.0531	1.04571	0.46152	-0.38323
YKR021W	-0.56369	-0.22793	-0.35293	-0.37435	-0.45483	-0.32698	-0.21273	-0.35092	0.04295	-0.26222	-0.12504	-0.18996	-0.20899	-0.2704	-0.2394	-0.25996	-0.13468	-0.16412	0.22164	-0.12583	-0.17744	-0.76683	-0.1825	-0.40401	-0.32477	-0.38986	-0.18575	-0.38218	-0.18678	-0.29327	0.25604	0.09666	0.26737	0.26083	0.06027	-0.18967	-0.16472	-0.22139	-0.18216	-0.14204	-0.29636	-0.19198	-0.09992	0.30161	-0.31413	-0.34314	-0.07497	-0.21431	-0.1608
YLR328W	0.92784	1.13303	1.02739	1.14315	0.75659	1.06407	1.01131	0.74485	1.24999	1.0923	1.06862	1.04292	1.14987	1.14064	1.05203	0.94557	1.27584	0.84812	0.94888	0.76173	1.13989	0.87718	1.15331	0.86028	1.09708	1.18952	1.09863	1.38641	0.68717	1.34402	1.42892	0.76949	0.88756	0.75409	1.14218	1.01585	1.09127	0.91775	1.27558	1.08899	0.81385	1.15481	0.97744	1.00922	1.05091	0.80803	0.75488	0.59693	1.17282
YKL173W	0.08083	0.0997	0.27343	0.10175	0.18973	0.17032	-0.05037	-0.13624	0.20942	0.21294	0.14782	0.01842	-0.13349	-0.22561	-0.13674	-0.26004	-0.18068	-0.25001	-0.19428	-0.2731	0.05602	-0.36433	-0.40894	0.09286	-0.18992	-0.52863	0.26155	-0.04443	0.10172	-0.12444	-0.18924	-0.23893	-0.21319	-0.55776	-0.06997	0.12056	-0.24554	-0.01571	-0.51571	-0.01139	0.07064	0.05778	0.13387	-0.45494	0.16729	-0.00012	0.00205	-0.00206	0.2898
YBL003C	4.18578	4.3269	5.21865	4.12082	4.52177	4.33151	4.91308	4.99327	5.21548	4.97541	4.91121	4.75799	4.66218	4.81837	5.14741	4.41798	4.73013	4.88371	4.09421	4.30872	4.97794	4.69695	4.34982	4.81637	4.67129	4.69991	4.95744	4.79916	4.30177	5.05432	4.8022	4.73153	4.24244	4.61182	4.19276	4.40262	4.56633	4.9969	4.27543	4.55834	4.89327	5.0058	4.22051	4.60909	5.76414	5.08378	5.01399	5.19319	5.23116
YNR013C	2.07915	1.86495	1.9582	1.9663	1.84187	1.89939	1.82538	1.76291	1.68251	1.73355	1.77692	1.82906	1.98156	1.97991	1.82459	1.72478	1.86118	1.55516	2.28944	2.13757	2.44083	2.45719	2.34425	2.02128	1.57282	1.92413	2.16678	2.67305	2.19787	2.30163	2.61574	2.14032	1.77015	1.91443	2.05977	2.13874	1.90749	1.79914	1.75973	1.60119	1.94168	1.86858	2.11978	2.20256	1.62236	1.94531	2.14265	2.10542	1.60277
YJR077C	3.75155	3.26432	3.24781	3.36579	3.61423	3.38241	4.90333	4.78209	4.60691	4.85065	4.82138	4.91508	5.52822	5.34351	5.32893	5.19044	5.38634	5.31954	4.36412	3.78475	4.64494	4.5034	4.73829	4.63061	3.35497	3.65981	5.10606	5.17598	3.54424	3.99828	5.92184	5.30841	4.0044	4.47942	3.61219	4.01086	4.3593	3.95179	3.82809	4.13966	4.97277	4.42596	3.8674	4.55246	4.63665	4.16118	4.60395	4.78805	4.38957
YDR376W	-0.06724	-0.0926	-0.29614	-0.21185	-0.18655	-0.1404	-0.26844	-0.59609	-0.22854	-0.07037	-0.18675	-0.03791	0.01073	-0.08439	-0.04202	0.21865	0.02127	-0.10868	-0.21104	-0.44909	-0.20441	-0.38888	0.25788	-0.53337	-0.14496	-0.30476	-0.09241	-0.19364	-0.31688	-0.48643	0.46722	-0.68008	-0.25335	-1.19834	-0.02551	-0.37421	-0.38557	-0.57683	0.08933	-0.26396	-0.28034	-0.04631	-0.38853	-0.28259	-0.41482	-0.51553	0.0739	-0.04357	0.10692
YJL120W	-4.30294	-4.67145	-3.99645	-4.36461	-4.14014	-4.24874	-4.22188	-4.68394	-4.88345	-4.60478	-5.02385	-4.72527	-4.25594	-4.47855	-4.31217	-4.36891	-4.25713	-4.46793	-3.53387	-4.00404	-4.91887	-4.2325	-4.23702	-4.42195	-5.14465	-4.32046	-4.64627	-4.77058	-4.07723	-4.73174	-4.13232	-4.529	-3.77845	-3.89162	-4.34515	-4.18884	-4.60731	-4.00268	-3.9583	-4.22378	-4.92191	-4.59589	-4.2551	-4.29771	-4.36131	-3.90618	-4.21902	-4.21387	-4.70785
YPR078C	-4.20377	-4.48473	-4.22518	-4.40926	-4.41669	-4.33559	-4.17787	-3.91369	-4.00964	-4.41206	-3.96401	-4.52035	-3.97163	-4.29904	-4.14244	-4.19613	-3.99289	-3.94862	-4.15293	-4.15619	-4.23794	-4.46434	-3.97984	-4.18106	-3.69175	-3.83253	-4.19869	-4.48091	-3.73857	-4.10991	-3.99059	-4.03671	-4.46122	-4.74851	-3.7118	-3.93641	-4.46255	-4.36791	-3.90042	-4.29931	-3.95052	-4.22739	-3.64165	-4.19016	-3.8063	-4.13068	-4.25417	-4.35794	-4.31248
YGL058W	1.20631	1.11009	1.28165	1.17469	1.14646	1.40529	1.2194	1.09015	1.47107	1.28321	1.39817	1.23937	1.02224	1.22392	1.33159	1.31059	1.25948	1.23839	1.32242	1.40735	1.38656	0.98324	0.83581	0.96141	1.44233	1.23426	1.35389	0.62603	1.25392	1.06183	0.97697	1.24419	1.05717	0.54625	1.35607	1.34707	1.43104	1.2698	1.34681	1.56611	1.27728	1.34394	0.76095	0.93472	1.19787	1.18778	1.59182	1.23739	1.48525
YFL005W	1.93925	2.2574	2.25164	2.12707	2.12893	2.28291	2.11253	2.01721	2.44744	2.54135	2.62233	2.5378	2.20388	2.1905	2.2428	2.65824	2.49151	2.60095	2.3707	2.07287	2.48035	2.24668	2.11471	1.77063	2.24756	2.17428	2.03783	2.36464	2.01534	1.98057	2.64523	2.19213	2.15338	2.388	2.66653	2.41364	2.2709	2.43728	2.20405	1.92087	2.02176	2.45642	1.84217	2.50776	2.20067	2.40927	2.48311	2.13066	2.25775
YMR284W	-1.8965	-1.5784	-1.37474	-1.55353	-1.52898	-1.85284	-1.85971	-1.7367	-1.76785	-2.48582	-1.93714	-2.01287	-2.34371	-2.42282	-2.26344	-1.87453	-1.79013	-1.93326	-2.04352	-1.69316	-1.70969	-1.72362	-2.28647	-2.22743	-1.82785	-2.13653	-1.78732	-1.96445	-2.00376	-1.84857	-2.44372	-2.84384	-1.93651	-2.91157	-1.9464	-2.23926	-1.8724	-1.62651	-2.03885	-2.27609	-1.8244	-1.8223	-1.90455	-1.71789	-1.74933	-1.90692	-1.44797	-1.62141	-1.4079
YML061C	-0.32148	-0.23724	-0.28871	-0.39353	-0.27008	-0.27714	-0.23563	-0.29075	-0.24878	-0.2173	-0.2297	-0.222	-0.61067	-0.71152	-0.66154	-0.61842	-0.68856	-0.38284	-0.76026	-0.43939	-0.86345	-0.58358	-0.86257	-0.37831	-0.48292	-0.67892	-0.53827	-0.90023	-0.51992	-0.61731	-1.01844	0.06433	-0.22172	-0.30203	-0.53426	-0.50579	-0.62577	-0.45841	-0.64949	-0.19564	-0.40796	-0.48623	-0.3851	-0.46804	-0.4557	-0.33593	-0.23628	-0.42792	-0.40094
YJL139C	0.13432	0.45362	-0.07174	0.03565	-0.20602	0.32785	-0.02747	0.11857	-0.02422	0.06414	-0.04545	-0.05021	0.29339	0.68703	0.09671	0.32775	0.3265	0.20382	0.26436	0.24065	-0.1217	-0.22882	0.11458	0.16411	-0.15968	0.1584	-0.36012	0.21942	-0.28726	0.0477	0.72127	0.16109	0.07659	-0.07409	-0.1078	0.02506	-0.12026	-0.04376	-0.00608	-0.16902	0.0252	-0.02083	0.16883	0.15922	0.1557	-0.11326	-0.3193	0.06925	-0.43559
Q0045	4.23981	3.79054	4.0372	3.78802	4.16956	4.25612	4.70763	4.53748	4.70477	4.54851	4.8635	3.84186	5.16829	4.9453	5.05274	4.92219	5.02185	5.18049	4.12035	4.35604	3.92062	3.41559	4.10618	4.37495	4.00431	3.37146	3.49805	4.2768	3.39711	4.05186	5.39393	3.5594	2.60956	1.80501	3.3753	4.31976	3.36686	2.7175	3.54306	4.03474	4.55506	4.35817	3.43208	1.81697	4.7855	4.08099	4.31515	4.64648	3.39734
YDL129W	-0.05535	0.18968	0.16722	0.0278	0.20484	0.02198	0.17355	0.39964	0.20151	0.24022	0.59788	0.78494	0.35962	0.35988	0.36918	0.37405	0.22237	0.47885	0.12831	-0.25822	0.10009	-0.48702	-0.12561	0.14558	-0.1991	-0.25316	0.34447	0.00932	0.43683	0.3733	0.27855	0.84701	0.88466	1.31042	0.47084	0.27496	0.01475	-0.00784	0.48191	0.73004	0.12336	-0.24984	0.65388	0.52703	0.2668	0.23094	-0.17119	-0.60914	0.17353
YLR449W	3.14109	2.67329	3.21044	2.72062	3.0372	2.76949	3.24506	3.43626	2.80909	3.06672	3.11807	3.29839	2.9007	2.90466	2.79747	2.68331	2.65659	3.2053	3.25226	3.47295	2.57415	2.98035	2.6058	3.28188	2.7926	2.59704	2.71801	2.87457	3.49077	2.84666	1.49538	2.78483	2.60352	2.68834	3.08305	3.2533	2.91791	3.25644	3.08745	3.13591	3.16382	3.11167	3.05087	2.7872	3.34032	2.91224	3.13685	3.13085	2.92239
YAL037C-B	-4.35185	-4.27929	-4.51366	-4.10928	-4.23066	-4.5523	-4.65981	-4.71699	-4.4358	-4.40908	-4.64791	-4.29586	-4.31286	-4.61092	-4.716	-4.86167	-4.49728	-4.41816	-4.80018	-4.61697	-4.47445	-4.49255	-4.73948	-4.65354	-4.27006	-4.66026	-4.42302	-4.23789	-4.33328	-4.38205	-4.66941	-4.62679	-4.56271	-4.28096	-4.45982	-4.36508	-4.4808	-4.78716	-4.74607	-4.14822	-4.61967	-4.21501	-4.65125	-4.49389	-4.74837	-4.70665	-4.30214	-4.50239	-4.71184
YLR021W	-0.16492	0.38291	0.27135	-0.0356	0.25868	-0.0526	0.46537	0.36276	0.26133	0.15662	0.13193	0.34392	0.20515	0.26826	0.33725	0.11143	0.62421	0.46658	0.06155	-0.05905	0.15162	0.05399	-0.25932	0.28585	0.21533	0.13391	0.40199	0.087	0.13846	-0.10333	0.03726	0.08066	0.40279	0.16097	0.01818	0.06807	0.44602	0.60725	0.046	0.25247	0.04996	0.39016	0.15117	0.34881	0.19628	0.18397	0.31233	-0.01603	0.55383
YDL007W	1.89361	1.79636	2.24291	2.1691	2.19692	2.14003	1.84783	2.14675	1.72934	2.00662	1.81581	1.6488	1.57413	1.85806	1.85161	1.92869	1.81556	1.95465	1.78698	2.14336	1.61292	2.0457	1.45609	1.85848	1.98902	1.59748	2.33554	1.99102	2.21171	2.05609	1.06056	1.95433	1.50549	1.88482	1.88032	2.02253	2.15144	2.11611	1.47566	1.71122	2.28044	2.35146	1.98159	1.30845	2.07378	2.40321	2.3759	2.48905	2.46666
YKR069W	-1.60242	-1.61538	-1.64847	-1.59302	-1.62446	-1.9139	-0.73932	-0.79554	-0.95131	-0.70969	-0.65842	-0.78019	-2.13106	-2.41788	-2.21112	-1.90485	-2.32742	-2.16708	-0.36141	-0.04755	-1.25471	-0.5285	-1.43051	-1.5427	-1.04979	-1.58897	0.30924	0.86761	-0.53915	-1.99219	0.70628	1.02342	-0.15998	0.00936	-0.50396	-0.41179	-1.43788	-1.39986	-1.73428	-1.36892	-1.12105	-1.37361	-1.29346	-1.37915	0.44885	-1.59906	-0.98445	-1.22098	-1.42828
YOR145C	2.20016	2.26441	2.56831	2.37097	2.4942	2.35963	3.10716	2.74695	3.04115	3.09705	3.03144	3.01604	2.83947	2.80244	2.97125	2.63747	2.81985	3.07643	2.35933	2.53781	2.24329	2.08326	2.41667	2.99212	2.08415	1.8018	2.23346	1.93027	2.36253	2.44759	2.04056	2.22516	2.49154	2.09974	2.65354	2.563	2.05596	2.05831	2.54821	2.77378	2.45745	2.45297	2.4065	2.32389	2.52603	2.6935	2.42457	2.38377	2.62828
YMR317W	-3.76069	-3.97831	-3.43719	-3.93224	-3.83593	-3.89173	-2.97935	-3.11869	-3.19919	-3.52818	-3.06045	-3.10753	-3.58175	-3.86329	-3.72482	-4.19634	-3.8075	-3.89271	-2.01518	-1.78242	-3.52602	-3.63797	-2.45681	-3.48381	-2.36867	-2.18984	-3.57852	-3.18855	-3.18109	-1.65916	-3.04216	-3.11359	-3.66219	-3.54526	-2.51218	-3.13584	-3.02397	-3.06051	-0.58955	-2.70555	-2.96206	-3.53739	-2.89655	-2.98058	-3.51134	-2.33758	-3.59771	-3.80008	-3.86388
YOR287C	0.01266	-0.83655	0.12004	-0.006	0.53002	-0.27884	0.20862	0.35896	-0.39846	-0.01214	-0.45223	0.34987	-0.1761	-0.83214	-0.47641	-0.45176	-0.36693	0.36773	0.43069	0.21787	-0.8286	-0.54479	-1.4247	0.24073	-0.57077	-1.5704	0.07771	-1.34606	0.32381	-0.14397	-1.82443	0.45381	-0.32782	0.26083	0.02978	-0.07047	-0.31057	-0.39658	-0.37995	-0.10477	0.5128	-0.54088	0.37235	-0.29315	-0.22081	0.1377	0.00673	-0.18367	-0.07139
YHR071C-A	-3.42813	-3.36106	-3.25524	-3.52767	-3.45876	-3.54954	-3.48373	-4.0688	-4.20729	-3.29434	-3.91459	-4.19015	-3.76028	-4.17981	-4.02599	-3.70177	-3.52828	-3.58891	-2.98788	-3.19361	-3.41446	-3.65184	-3.4573	-3.52154	-3.51446	-2.69664	-3.5027	-3.99755	-4.16125	-3.9093	-2.83295	-3.59512	-4.12005	-4.43382	-3.17732	-3.95234	-3.57838	-2.88614	-3.18115	-3.38275	-4.01258	-3.90958	-4.47955	-3.15998	-3.89949	-3.88383	-3.35157	-3.19248	-3.67415
YIL122W	-1.00513	-1.19963	-1.02834	-1.26091	-0.95227	-1.66007	-0.25213	-0.35328	-0.88489	-0.67481	-0.48537	-0.4286	-0.93189	-0.97396	-1.22748	-1.1702	-0.81359	-1.41723	-0.46589	-0.9235	-0.68942	-0.73418	-0.73485	-0.53184	-1.01481	-1.19752	-0.2188	-0.4125	-0.86312	-0.55947	-0.90277	-0.49886	-0.7662	-1.28112	-0.71963	-0.59254	-0.69912	-0.57743	-0.51132	-0.58977	-0.43582	-0.89358	-0.40155	-0.43027	-0.29942	-0.59167	-0.74641	-0.71513	-0.24895
YPL218W	3.48346	3.94922	3.5955	3.61184	3.42152	3.68478	3.60094	3.90434	3.94364	3.83067	3.85415	3.82441	4.45942	4.381	4.25643	4.38275	4.45532	4.54383	3.88961	3.77226	3.67098	3.87773	4.01584	3.67241	3.67452	3.96455	3.5622	4.17171	3.51805	4.25612	4.96889	3.51705	3.4996	2.71362	3.86672	3.77657	3.60272	3.83607	3.69661	3.66827	3.8455	3.89508	3.54497	3.52104	3.88419	4.77451	4.08704	4.07923	3.7714
YGR296C-B	-0.94715	-0.92317	-1.24185	-0.85474	-1.1553	-0.75303	-1.23064	-1.21033	-1.60001	-1.69741	-1.13976	-1.14977	-2.77581	-3.02918	-3.02976	-3.04369	-2.98707	-3.45161	-0.72437	-1.19385	-2.27891	-2.22403	-0.20678	-2.34155	-1.78619	-0.33522	-1.68335	-0.06938	-1.09895	-0.74297	-0.31404	-0.30675	-1.37868	-1.4386	-1.75014	-1.69739	-2.56937	-2.14229	-1.80439	-3.27077	-1.49597	-1.19957	-1.0651	0.18611	-1.74933	-1.15079	-2.67896	-2.15266	-2.00764
YJL145W	1.31781	1.41834	1.7491	1.21233	1.26662	1.55589	1.59627	1.46824	1.89636	1.3575	1.65519	1.60192	1.60379	1.61503	1.55027	1.37558	1.52502	1.71762	1.03468	1.44206	1.26812	1.28721	0.86958	1.42361	1.63875	1.70321	1.29689	1.3166	1.09932	1.59061	0.72707	0.76275	1.16972	-0.215	1.1908	1.4197	1.01989	1.83402	1.58137	1.70403	1.32258	1.31377	1.13108	1.01745	1.67789	1.72027	1.544	1.26816	1.3408
YLR080W	-3.36187	-2.78182	-3.2149	-2.93563	-3.08242	-3.43875	-3.88114	-3.66036	-3.87109	-3.90876	-3.6619	-3.99861	-4.03496	-4.38962	-4.14222	-4.0094	-3.73162	-3.93625	-3.30782	-3.34937	-3.56877	-3.30665	-3.47474	-3.78703	-2.90712	-3.3278	-3.05981	-3.30857	-2.98476	-3.28578	-3.64754	-3.34453	-3.88026	-3.36186	-3.54296	-3.935	-3.08956	-3.08768	-3.29147	-3.75949	-3.04258	-3.1674	-3.17614	-3.33997	-3.48148	-3.15431	-3.03933	-2.73994	-2.72145
YPR037C	0.10738	0.39686	0.51119	0.57429	0.33936	0.24877	0.1413	0.34258	0.06063	0.14924	-0.03896	0.58512	-0.06836	0.44661	0.23109	0.40295	0.50706	0.54496	0.48747	0.55601	0.0941	0.88888	0.77005	0.36125	0.76464	0.8644	0.38871	0.22448	0.79618	0.6419	0.10915	1.04154	0.91558	1.8686	0.3541	0.3555	0.43476	0.543	0.45935	0.33731	0.41737	0.63605	0.39077	1.05521	0.22816	0.70773	0.79753	0.56864	0.21323
YJR149W	-1.17302	-1.09936	-1.13479	-0.99839	-1.11014	-1.18202	-0.79429	-0.56844	-0.46425	-0.92215	-0.72945	-0.87562	-0.87957	-0.8808	-0.92717	-0.92979	-0.98563	-1.08228	-0.30324	-0.32393	-1.07118	-1.22459	-0.64523	-0.29331	-0.33872	-0.47474	-1.57499	-0.94808	-0.9063	-1.64524	-1.20582	-1.6575	-0.15778	-0.68238	0.58708	0.11695	-1.58478	-1.28606	-0.3138	0.06867	-1.71688	-1.53072	-0.93321	-0.94618	-1.46447	-1.81451	-0.41322	-0.94206	-1.62052
YKL036C	-4.14922	-3.32627	-3.70391	-3.93124	-3.72666	-3.71722	-3.90467	-3.42815	-4.09864	-4.05739	-4.25733	-4.32185	-4.16387	-4.07477	-4.11631	-2.95505	-4.20076	-3.89271	-4.08803	-3.67198	-3.76533	-3.78986	-3.95193	-4.09294	-3.66159	-3.93998	-3.81269	-3.65773	-3.113	-3.71623	-3.56183	-4.30381	-4.18313	-3.68978	-4.20411	-3.94462	-4.4137	-3.89532	-3.88988	-3.8469	-3.32344	-3.72985	-3.68118	-2.96078	-3.58464	-3.1271	-3.66545	-3.42841	-3.66296
YNR052C	1.48519	1.95182	1.44836	1.48979	1.51922	1.67863	1.71996	2.00986	1.80244	1.86909	1.94157	1.76797	1.36604	1.85273	1.66274	1.63967	1.86719	1.51574	1.37787	1.75228	1.57445	1.6426	1.80832	1.82951	1.64607	1.68722	1.47425	1.66516	1.62254	1.5231	1.67899	1.86473	1.9919	1.72764	1.64217	1.79422	1.73247	1.85151	1.46874	1.81224	1.51993	1.52602	1.85752	1.80735	1.88602	1.90146	1.60306	1.94146	2.03107
YPR198W	1.02012	0.69227	0.44997	0.54045	0.55204	0.5837	-0.02222	-0.0967	-0.02854	0.0442	0.05017	0.06546	0.89002	0.67829	0.4995	0.75077	0.68272	0.68964	0.90588	0.56411	0.45913	0.54659	1.00931	0.16667	0.54701	0.8974	-0.04776	0.57333	0.22323	0.64602	1.72437	0.17895	0.40238	0.36277	0.38351	0.4752	0.25313	0.07531	0.33364	-0.15188	0.90241	0.73963	0.88072	0.36087	0.61907	0.27805	0.26819	0.249	0.28464
YHR098C	1.96388	1.90653	1.85967	1.98959	1.80321	1.95336	1.89856	1.70224	2.01282	2.06145	2.15095	1.92587	2.21966	2.0556	2.04916	1.98751	2.30916	1.90476	2.09736	1.99	2.14456	2.02692	2.26269	1.63725	2.21292	2.23639	1.63752	2.23665	2.06759	2.01606	2.32211	1.71212	1.70484	1.6322	2.13395	2.01774	1.74343	1.98906	2.2983	1.88942	1.96044	2.13915	2.17804	1.99156	1.88597	1.76307	1.96899	2.0924	1.95725
YLR173W	-0.98706	-1.05648	-0.9815	-1.16009	-1.03972	-1.01316	-1.10309	-1.43567	-1.41812	-1.30373	-0.99182	-1.01867	-0.85683	-1.14328	-1.05015	-0.95541	-0.93397	-1.28462	-0.56286	-1.3274	-0.80129	-1.12863	-0.66712	-1.13792	-1.1224	-1.23606	-1.14583	-1.36777	-1.12135	-1.40307	-0.83227	-0.59602	-0.9009	-0.77988	-1.19171	-1.34935	-1.04174	-1.20703	-1.02846	-1.16926	-1.11728	-1.029	-1.20047	-0.69393	-1.27978	-1.16175	-0.81178	-1.22538	-1.07439
YMR314W	1.93531	2.43805	2.16386	2.23128	2.27857	2.27483	2.53967	2.3439	2.36434	2.39762	2.19114	2.20099	2.16059	2.17403	2.30368	2.56558	2.11467	2.39929	2.11255	2.15884	2.64122	2.55518	2.45301	2.214	2.30133	2.6213	2.64061	2.26205	2.59935	2.26698	2.06935	2.6665	2.43185	2.2265	2.47397	2.31941	2.68405	2.84004	2.39663	2.31621	2.3372	2.60943	2.2654	3.21596	2.20679	2.61266	2.53288	2.53549	2.86613
YOR244W	-0.39333	-0.5967	-0.13932	-0.41525	-0.24413	-0.56952	-0.40141	-0.26145	-0.43745	-0.60931	-0.47942	-0.40489	-0.2332	-0.50839	-0.16928	-0.24383	-0.1979	-0.09393	-0.76761	-0.42929	-0.6798	-0.69365	-0.89208	-0.46353	-0.55339	-0.85952	-0.29919	-0.72314	-0.38882	-0.69662	-0.97925	-0.82613	-0.58354	-0.67515	-0.57209	-0.49178	-0.24293	-0.52628	-0.56527	-0.53868	-0.22189	-0.33654	-0.53059	-1.03889	-0.32743	-0.46097	-0.40693	-0.39652	-0.31654
YHR190W	2.45167	2.42554	2.35027	2.44136	2.41086	2.48996	2.62697	2.34582	2.76116	2.73132	2.82954	2.55684	3.47997	3.37169	3.41302	3.36172	3.29403	3.55035	2.36821	2.24398	3.12588	2.78182	2.46629	1.84085	2.56232	2.47246	2.69633	2.66932	2.29146	2.91098	2.44497	2.06277	2.49309	2.50191	2.33064	2.13899	2.6032	2.56197	2.70177	1.84717	2.50143	2.81175	2.37508	3.05418	3.03542	2.85879	2.44349	2.60205	2.74537
YPL097W	-1.14059	-0.84014	-1.06925	-1.0917	-1.07925	-1.11126	-0.44115	-0.38102	-0.21637	-0.45231	-0.39107	-0.35999	0.14274	0.16923	0.24466	0.36998	0.21909	0.26157	-1.27131	-1.16044	-1.10223	-1.28497	-0.35675	-0.85958	-1.49998	-1.48031	-0.7604	-1.03015	-1.3344	-0.49231	-0.32018	-0.37218	-1.06681	-0.82594	-1.03261	-1.01139	-1.10282	-1.31371	-0.64785	-0.92001	-0.88553	-0.81745	-1.17267	-1.11357	-0.85138	-0.06671	-0.64294	-0.80724	-0.90506
YLR103C	-1.18497	-1.17805	-0.82321	-1.01282	-0.94643	-1.2542	-0.78122	-0.74638	-0.72786	-0.69821	-0.64563	-0.73328	-1.1243	-0.76573	-0.81604	-1.03453	-1.04129	-0.91879	-1.38182	-1.11387	-1.44908	-1.52246	-1.47808	-1.39655	-0.88559	-1.63462	-1.14494	-1.74719	-1.16018	-1.39578	-1.9969	-0.82005	-0.83111	-0.46303	-1.23253	-1.18253	-0.98186	-0.9967	-1.42989	-1.13529	-1.09178	-0.93483	-1.01225	-0.99729	-0.9174	-1.08918	-0.99977	-1.37332	-0.88998
YNL115C	-0.53853	-0.47362	-0.67232	-0.68588	-0.6385	-0.60323	-1.18268	-1.05889	-1.07527	-1.02172	-0.99547	-1.31232	-0.68499	-0.7039	-0.71586	-0.65604	-0.61036	-0.86286	-0.54707	-0.76026	-0.24266	-0.18981	-0.42157	-0.52428	-0.11338	-0.30925	-0.1343	-0.48726	-0.67709	-0.51908	-0.74361	-0.88868	-0.46101	-0.32178	-0.7149	-0.74091	-0.37615	-0.13359	-0.48765	-0.64285	-0.53691	-0.67535	-0.2631	-0.50581	-0.45096	-0.58844	-0.41163	-0.28801	-0.2599
YBR112C	1.73574	1.42538	1.80805	1.66061	1.70976	1.66234	2.0973	1.96702	1.77395	2.05653	1.98734	1.96341	1.75441	1.94411	1.95438	1.65639	1.98527	1.84742	1.75127	1.67428	1.9002	1.84184	1.6741	1.80886	1.87936	1.77101	1.7735	1.79967	2.01629	2.28518	1.22402	2.07525	1.55288	1.96908	1.93104	1.81776	2.14052	1.87418	1.65134	1.83524	1.65996	1.65341	2.11908	1.60812	1.94723	2.01355	1.8319	1.79	1.9428
YLR123C	-2.28962	-2.84378	-2.72364	-2.46108	-2.45197	-2.95616	-2.58285	-3.12207	-2.88956	-3.60743	-2.75734	-3.18156	-2.2592	-2.88099	-2.65178	-2.92832	-2.89306	-2.98766	-2.18702	-2.63283	-2.51664	-2.85816	-2.48879	-2.8861	-2.55512	-2.6665	-3.67424	-3.23532	-3.31231	-2.45428	-2.34626	-3.09829	-2.69108	-2.37429	-2.11607	-3.07754	-3.0805	-2.95177	-2.42513	-2.48761	-2.79773	-2.69059	-2.89438	-2.38832	-2.75678	-2.64178	-2.97555	-3.24549	-2.94074
YNL247W	2.60316	2.35464	2.5176	2.49844	2.557	2.6114	2.53132	2.53965	2.54716	2.58118	2.69631	2.49591	2.32263	2.36924	2.61809	2.1621	2.57956	2.5021	2.09706	2.33668	2.26663	2.03696	2.10384	2.35697	2.56316	2.04453	2.42021	2.20627	2.57834	2.43089	1.84309	1.88404	1.60086	1.42251	2.30801	2.48246	2.44088	2.1239	2.21866	2.41635	2.45898	2.58292	2.52109	1.92522	2.67429	2.42532	2.7609	2.6833	2.57405
YOR345C	-4.08917	-4.46755	-4.19876	-4.15703	-4.27342	-4.25735	-4.9374	-4.61695	-4.83219	-4.92558	-4.67698	-5.16344	-4.63299	-4.51553	-4.4889	-4.83073	-4.95576	-4.658	-3.77997	-3.9793	-4.87389	-4.21835	-4.23392	-4.10942	-4.14735	-4.09643	-4.39553	-4.59942	-3.99058	-4.33574	-4.40431	-4.87163	-4.83942	-3.27529	-4.2542	-3.87708	-4.21835	-4.48885	-4.51472	-3.75345	-3.92922	-4.22747	-4.91463	-4.49389	-4.58005	-4.06114	-4.49988	-4.08477	-3.97501
YER014C-A	-4.61609	-4.63428	-4.30358	-4.87282	-4.62568	-4.24458	-4.59627	-4.6521	-3.92274	-4.69841	-4.10799	-4.67799	-4.32359	-4.66518	-4.23813	-4.50719	-4.9691	-4.47326	-4.6704	-4.35705	-4.57682	-4.96535	-4.39842	-4.71699	-4.58149	-4.56031	-4.30226	-4.81054	-4.08529	-4.64362	-4.3839	-4.59156	-4.21999	-4.68276	-4.20431	-4.47461	-4.51486	-4.86238	-4.56819	-4.1426	-4.37496	-4.49199	-4.22508	-5.18507	-4.83028	-4.31122	-4.72663	-4.57124	-4.691
YNR065C	-0.2624	-0.56945	-0.42834	-0.4196	-0.27769	-0.35908	-1.37344	-1.65682	-1.31188	-1.39032	-1.15064	-1.49518	-0.29513	-0.4426	-0.29285	-0.52289	-0.37719	-0.4489	-0.82264	-0.80853	-1.12292	-1.44047	-0.72067	-0.74142	-1.17664	-1.23192	-1.00539	-1.18795	-1.39538	-0.45531	-1.13827	-1.80424	-1.25047	-1.87103	-0.43926	-0.5776	-1.45721	-1.59387	-1.20399	-0.95245	-1.19472	-1.33267	-1.22754	-1.7087	-0.74153	-0.44363	-1.5529	-1.10063	-0.9612
YKL132C	-1.66154	-1.23565	-1.44186	-1.28081	-1.23917	-1.38897	-2.5281	-2.89754	-2.31638	-2.83142	-2.18191	-2.34373	-2.57407	-3.05389	-2.77223	-2.81228	-2.88977	-2.86004	-1.82316	-2.28929	-2.04969	-2.27208	-2.46016	-2.52863	-2.25721	-2.4693	-1.92662	-1.8806	-2.62895	-1.36053	-2.51532	-2.56111	-1.84824	-3.44661	-1.87765	-2.08524	-2.07503	-2.03422	-1.29624	-1.48469	-1.96252	-1.40802	-1.9029	-2.00358	-1.877	-1.52596	-1.96163	-2.26353	-1.50552
YKL012W	-0.07019	-0.13127	0.05471	-0.05435	0.02489	-0.18002	-0.0599	-0.22556	-0.367	-0.34605	-0.18868	-0.09369	-0.44847	-0.33839	-0.39763	-0.30883	-0.37274	-0.28067	-0.47443	-0.11937	-0.76512	-0.23348	-0.59007	-0.08007	-0.19356	-0.57538	-0.26674	-0.22524	0.08694	-0.29908	-1.06302	-0.25476	-0.38087	-0.29379	-0.30059	-0.09736	-0.20709	0.0178	-0.12075	-0.26798	-0.04933	-0.07494	-0.1784	-0.30749	-0.36583	-0.17256	0.06416	-0.00393	-0.36456
YPL222W	-2.00641	-1.55202	-1.91173	-1.85684	-1.90461	-2.26988	-2.34359	-2.04038	-2.23384	-2.5304	-2.42492	-1.87787	-1.79941	-1.91423	-1.84068	-1.56835	-1.97927	-1.70267	-1.96025	-2.25071	-1.83298	-2.37501	-1.82433	-2.38414	-1.73775	-1.80166	-1.39881	-1.58102	-1.79545	-1.34009	-1.67454	-1.83499	-1.51658	-2.28296	-2.12485	-2.51658	-1.72845	-2.0945	-2.12765	-2.12615	-1.54944	-1.98639	-1.84109	-1.336	-2.05174	-1.65157	-1.57773	-1.22987	-1.30337
YLR395C	1.9076	1.95121	2.10647	1.84581	2.16301	2.31805	4.0199	4.47628	4.09588	4.296	4.07595	4.04196	4.77076	4.94798	4.96273	4.69215	4.89391	4.9755	2.66564	2.67956	3.5462	3.69182	3.52111	3.28962	1.7795	2.13682	3.59219	3.42711	2.42306	3.30969	4.05284	2.92988	1.74957	1.72548	1.94827	2.27214	2.98529	2.49518	2.51079	2.25378	3.49847	3.32985	2.74083	2.58938	3.03932	3.24175	3.07758	3.46026	3.43845
YHR141C	6.6023	5.79692	6.64844	6.16246	6.47898	6.1174	6.39177	6.25547	6.41445	6.29718	6.34949	6.07968	6.70546	6.16372	6.5778	6.07506	6.65602	6.38981	6.32035	6.19771	6.48906	5.68123	5.8972	5.7442	5.38242	5.77926	6.5748	6.27146	6.83033	6.24916	6.42824	6.05663	5.3407	5.51669	6.73257	6.19654	5.8197	5.58893	6.35415	5.51032	6.39978	6.24566	5.99174	5.97031	6.71128	6.40365	6.26196	6.36337	6.53774
YAL041W	0.61941	0.44512	0.53471	0.70317	0.53285	0.66072	0.46925	0.81482	0.5442	0.5462	0.47457	0.53909	0.61993	0.77932	1.00182	0.77126	0.74119	1.16519	0.82432	0.67119	1.09487	0.85163	0.7148	0.53668	0.76091	1.01944	0.85257	0.58565	0.78346	0.62372	0.75244	0.50579	0.55385	0.40797	0.91191	0.60338	0.81641	0.80223	0.69948	0.72639	0.58359	0.67798	0.87507	0.55063	0.7664	0.48824	0.55557	0.55079	0.78857
YBL052C	0.05687	-0.35321	0.1333	-0.08143	0.17928	-0.06544	-0.00092	-0.07939	-0.37535	-0.29733	-0.38494	-0.36765	-0.40675	-0.62712	-0.53405	-0.40841	-0.26325	-0.14663	-0.39683	-0.03917	-0.61367	-0.16212	-0.67108	-0.40147	0.23865	-0.14949	-0.47444	-0.72585	0.01477	-0.13527	-1.08429	-0.63182	-0.38845	-0.92887	-0.59744	-0.44311	-0.28118	-0.09693	-0.09863	0.01694	-0.14688	-0.32574	-0.21445	-0.87772	-0.12548	-0.18657	-0.21222	-0.16757	-0.46552
YCL045C	2.36533	2.28078	2.15725	2.1578	2.14452	2.31365	2.08697	1.97101	2.04496	2.13392	2.08771	1.86054	2.40939	2.49214	2.38055	2.4033	2.6278	2.35248	2.18111	2.34726	2.18107	2.22942	2.41122	2.08931	2.29019	2.37247	1.70123	2.47224	2.16301	2.25684	2.62927	2.07282	1.92525	1.81524	2.04962	2.18518	2.23302	2.26674	2.2546	2.07181	2.30347	2.40552	2.13735	1.87594	2.28061	2.16318	2.36836	2.49303	2.09998
YDL135C	1.46151	1.44677	1.43211	1.5407	1.5586	1.22749	1.64481	1.75412	1.64076	1.64769	1.62979	1.54634	1.60624	1.51695	1.63447	1.22043	1.62571	2.26858	1.54675	1.55226	1.65709	1.80022	0.89669	1.79709	1.79974	1.559	1.64235	1.67843	1.71665	1.31265	0.97629	0.36999	1.76385	0.00998	1.30771	1.65726	1.84969	1.901	1.60583	1.95608	1.55617	1.65385	1.40218	0.72549	1.80496	1.65482	1.55483	1.62583	2.00548
YNL011C	-1.22652	-1.08088	-1.26661	-1.2543	-1.25618	-1.47481	-1.8401	-1.61118	-1.42517	-1.62421	-1.4853	-1.76163	-1.3671	-1.5517	-1.17207	-1.18267	-1.59905	-1.75334	-1.5612	-1.57176	-1.25055	-1.10995	-1.19236	-1.45925	-1.20195	-1.21264	-1.38059	-1.51656	-1.71502	-1.76694	-1.30593	-1.97377	-1.1615	-1.88323	-1.42165	-1.69708	-1.13845	-1.34811	-1.20984	-1.72872	-1.45994	-1.31921	-1.36788	-1.79419	-1.26042	-1.48109	-1.54979	-1.44257	-1.34352
YMR237W	1.36801	1.66601	1.593	1.64867	1.53707	1.6876	1.03152	1.00286	1.27076	1.33264	1.37591	1.28527	1.18063	1.20473	1.17766	1.14154	1.22904	1.2716	1.22057	1.07649	1.5443	1.17749	1.34263	1.14692	1.58205	1.23392	1.41081	1.58254	1.39242	1.36282	1.61823	1.03802	1.42938	0.71616	1.69752	1.46976	1.39032	1.16083	1.23526	1.26359	1.50659	1.70392	1.44689	1.40048	1.71035	1.59535	1.71384	1.47243	1.5841
Q0032	-4.48113	-5.18162	-3.97962	-4.4058	-3.82164	-4.22256	-4.72051	-4.53137	-5.151	-4.77424	-4.86303	-5.01082	-4.88614	-4.959	-4.83893	-4.62017	-4.51237	-4.50892	-4.3656	-4.04994	-4.85353	-4.89578	-4.2615	-4.35581	-4.91974	-4.62418	-4.81183	-4.0533	-5.03946	-4.64991	-3.7975	-4.60821	-4.23604	-4.6281	-4.97321	-4.2529	-4.70127	-4.69146	-4.28887	-4.33243	-4.13816	-4.03004	-4.37689	-4.36833	-4.13896	-4.16144	-3.87608	-3.9792	-4.63487
YOR020W-A	0.05814	0.20254	0.18522	0.32463	0.21753	-0.05652	0.29691	0.89346	0.75142	0.33906	0.41499	0.55627	0.19527	0.97192	0.98137	0.87504	1.02335	0.76515	1.13435	0.96625	0.94207	1.01649	0.94856	1.25367	0.54788	1.13386	1.49557	1.46554	1.00814	-0.14289	0.52746	0.90713	0.47263	1.31335	0.68001	0.86901	1.75106	2.09582	1.21794	0.9108	0.59149	0.99852	0.98877	1.62212	1.14464	0.03783	0.28623	0.74281	0.70133
YOR054C	-0.99769	-1.11984	-1.15212	-1.08324	-1.15907	-1.35652	-0.88554	-0.75137	-0.92229	-1.14624	-0.85541	-0.78857	-1.38342	-1.47339	-1.36019	-0.98721	-1.13037	-1.45437	-1.25367	-1.21749	-1.0688	-0.77838	-1.08059	-1.11995	-0.82002	-0.85209	-0.9455	-0.92325	-0.82324	-1.03562	-1.3687	-0.49896	-1.02244	-0.89595	-0.96267	-1.04484	-0.74339	-0.43231	-0.96184	-1.14646	-0.71368	-0.8872	-0.74074	-0.93602	-0.97634	-1.13587	-0.87157	-0.67181	-1.02482
Q0070	2.85196	1.59752	3.05663	2.46883	2.97116	2.71977	-3.11721	-3.72654	-2.42116	-3.83045	-2.07581	-4.37365	3.73557	3.49962	4.09614	2.89963	3.27273	3.60926	0.58977	3.08878	1.58934	1.12802	2.20797	1.99424	1.68201	1.74817	1.40689	2.32397	1.57319	2.59522	2.20208	0.97192	-1.55359	-0.72158	0.65729	2.33261	0.651	-0.12984	1.54232	2.53167	2.25342	2.25252	1.77917	-0.41508	2.92985	2.24742	0.98045	2.73499	1.31539
YGR214W	6.37912	5.46761	6.51658	5.22211	6.31964	5.71018	6.11205	6.03099	6.32826	5.97234	6.17747	5.84526	6.39456	5.93219	6.39196	5.76368	6.14089	6.1505	6.28866	5.91752	6.43437	5.49858	5.59977	5.40764	5.49896	5.57056	6.42176	6.26076	6.10495	5.99769	6.55425	5.70774	5.97804	5.37601	6.41002	6.1726	5.56107	5.61853	5.55316	5.30153	6.47709	6.145	5.99754	6.26011	6.50699	6.24465	6.18057	6.41818	6.36441
YIR021W-A	-3.84836	-3.8454	-3.92133	-3.80034	-4.07572	-2.94618	-4.22981	-4.35152	-3.97221	-4.24823	-3.77888	-4.24239	-3.38595	-4.13491	-3.58985	-4.83353	-3.18976	-1.96149	-4.18778	-4.09872	-3.57439	-4.55279	-3.77087	-4.05681	-4.03616	-4.74269	-3.83613	-3.6064	-4.17727	-4.80812	-3.35741	-4.52645	-4.41269	-4.30733	-3.93344	-3.95935	-4.08054	-4.38741	-3.86899	-4.17661	-3.60159	-3.68633	-3.19046	-4.04304	-3.88124	-4.22731	-3.04334	-3.86714	-3.90417
YGR046W	-0.40738	-0.32159	-0.31117	-0.32585	-0.24305	-0.11315	-0.31472	-0.4462	-0.09591	-0.37342	-0.09897	-0.49078	-0.25789	-0.18391	-0.30637	-0.32711	-0.01801	-0.16442	-0.26078	-0.27032	-0.11186	-0.0985	-0.0899	-0.24289	-0.44109	-0.39858	-0.48191	-0.34386	-0.75872	-0.29452	0.01312	-0.74559	-0.54032	-0.80503	-0.18137	-0.38414	-0.60207	-0.61773	-0.20065	-0.34228	-0.39839	-0.36415	-0.58792	-0.51523	-0.42386	-0.24462	-0.20506	-0.27043	-0.50078
YGR224W	-4.35941	-4.46623	-4.43738	-4.42399	-4.60745	-4.17086	-4.33168	-4.5555	-4.48198	-4.54772	-4.53795	-4.6967	-4.61033	-4.70992	-4.55195	-4.83086	-4.52363	-4.58376	-4.35046	-4.27444	-4.34775	-4.30129	-4.23389	-4.63687	-4.60973	-4.1912	-4.51159	-4.56207	-4.19405	-4.23402	-4.00527	-4.51403	-4.41721	-4.26193	-4.39723	-4.53479	-4.30897	-4.87454	-4.09184	-4.59745	-4.16753	-3.96876	-4.61924	-4.37881	-4.67315	-4.11816	-4.49999	-4.42993	-4.59226
YDR308C	0.30113	0.45407	0.50765	0.34453	0.50413	0.43964	0.2488	0.59289	0.48487	0.47848	0.31026	0.58804	0.40302	0.70765	0.72847	0.87372	0.67354	1.14406	0.05167	0.22244	0.19721	0.30739	-0.03226	0.68477	0.49793	-0.07415	0.53978	0.10799	0.2992	0.06835	-0.23774	0.45059	0.63517	0.91493	0.1602	0.34899	0.55053	0.52746	-0.01848	0.57315	0.55222	0.33645	0.15682	0.30138	0.53228	0.12176	0.70965	0.39988	0.55947
YMR130W	0.2615	0.2248	0.24599	0.48037	0.21071	0.26018	0.26402	0.04373	0.15999	0.24738	0.13559	0.02437	0.3851	0.46549	0.50825	0.43001	0.63046	0.34814	0.29242	0.24456	0.1415	0.13815	0.4361	0.1113	-0.05994	0.1084	0.17484	0.16291	0.07433	0.072	0.48259	0.22902	0.21509	0.27102	0.0598	0	0.21499	-0.09146	0.39865	-0.0876	-0.00687	0.2365	-0.00821	0.31394	0.23566	0.04257	0.23156	0.34474	0.18118
YLR455W	0.62364	-0.09155	0.48302	0.30661	0.66088	0.18529	0.26576	0.64948	0.35502	0.02702	0.19062	0.04865	0.25667	-0.05194	-0.04014	0.04926	0.28023	0.09223	0.25973	0.637	0.32575	0.56948	0.67936	0.37492	0.9254	0.68869	0.30521	0.44095	-0.04719	0.86821	0.42828	0.01319	-0.46483	-0.22981	0.53511	0.2737	0.59794	0.63325	0.21845	0.50512	0.66721	0.29199	0.25367	-0.29584	0.57325	0.58848	0.32965	0.66708	-0.01249
YGL259W	-2.4714	-2.26237	-2.41559	-2.10765	-2.64093	-2.78938	-3.10575	-3.10057	-2.94829	-3.56606	-3.07708	-3.01913	-2.85058	-3.28263	-3.3254	-3.11129	-3.49533	-3.41163	-2.28168	-2.38987	-3.37955	-3.3861	-3.03998	-3.81348	-2.94124	-3.2851	-3.67424	-3.36266	-2.76867	-1.33583	-0.83264	-2.12266	-3.73983	-4.38263	-2.65082	-3.51744	-3.57873	-3.51151	-2.34528	-3.35181	-2.49307	-2.49917	-2.17794	-2.78271	-2.46882	-1.95075	-2.28597	-1.72504	-3.06049
YJL153C	-2.77803	-2.58956	-2.88131	-2.73574	-2.672	-3.19963	-2.85877	-2.66692	-2.47752	-3.21323	-2.77104	-2.51006	-2.66892	-2.79846	-2.63191	-2.21149	-2.74139	-3.04412	-1.65803	-2.054	-2.67548	-2.72328	-2.20995	-2.74758	-2.34644	-2.40203	-2.69536	-2.82066	-2.31157	-2.0807	-2.25218	-2.77121	-2.70035	-3.06587	-2.02934	-2.26578	-2.42697	-2.50257	-2.18857	-2.82386	-2.52263	-2.44277	-2.20168	-2.03973	-2.77197	-2.17715	-3.3066	-2.73928	-2.76074
YIR030W-A	-4.57897	-4.37413	-4.30137	-4.55863	-4.84623	-2.88342	-4.24579	-4.76324	-4.73219	-5.00872	-4.58561	-4.88493	-4.81868	-4.48106	-3.7318	-4.64946	-3.50045	-4.28501	-3.67765	-3.84461	-4.84118	-4.59258	-4.04326	-4.20688	-4.9313	-4.70409	-4.78913	-4.71259	-4.95433	-4.04408	-4.16277	-4.92267	-4.51111	-3.0436	-4.97105	-4.52446	-4.58402	-4.70468	-4.83842	-4.42511	-4.33759	-4.33143	-4.4005	-4.79045	-4.51308	-4.9211	-4.48891	-3.89965	-4.57916
YKR036C	-0.11044	-0.2864	-0.17087	-0.22324	-0.08464	-0.16193	-0.49821	-0.37445	-0.47521	-0.25084	-0.38898	-0.2378	-0.86031	-0.75046	-0.77568	-0.83286	-0.62743	-0.76312	-0.68025	-0.28108	-0.63443	-0.70967	-0.34808	-0.03054	-0.54688	-0.98747	-0.1323	-0.72811	-0.13971	-0.51316	-0.39778	-0.32086	-0.46294	-0.7037	-0.29131	-0.34034	-0.57851	-0.50489	-0.59015	-0.19173	-0.27462	-0.43181	-0.46667	-0.85484	-0.63187	-0.8763	-0.57445	-0.556	-0.3862
YDR320C	0.25755	0.2817	0.18302	0.10327	0.15937	0.20278	0.14637	0.16935	0.38579	0.39527	0.43933	0.1762	0.57466	0.50491	0.57894	0.24207	0.59519	0.54486	0.4007	0.31131	0.56771	0.30929	0.20757	0.19755	0.49701	0.30337	0.19572	0.32224	0.29416	0.37234	0.04548	0.28035	0.29843	-0.48802	0.50541	0.44476	-0.07518	-0.1221	0.52275	0.40628	0.28393	0.37742	0.1262	0.13864	0.07636	0.20093	0.1375	0.13404	0.5053
YBR035C	1.4811	1.66775	1.57433	1.48247	1.35281	1.65199	1.9792	1.68406	2.05057	1.86248	1.96686	1.73941	1.50445	1.4238	1.63755	1.59697	1.44421	1.4734	1.18127	1.56065	1.54851	1.39703	1.42978	1.52526	1.67344	1.4592	1.77303	1.64564	1.5117	1.45586	1.42381	1.17677	1.45931	1.17542	1.42143	1.40211	1.89879	1.79179	1.62609	1.44341	1.89224	1.81146	1.41263	1.65418	1.7696	1.72373	2.02142	2.14346	1.8543
YCR002C	1.48581	1.50945	1.73602	1.71816	1.6008	1.6139	1.56226	1.37558	1.78503	1.48309	1.73457	1.55207	1.32912	1.5524	1.59002	1.73056	1.78299	1.38345	1.4538	1.39028	1.91178	1.70552	1.59109	1.07879	1.67062	1.97097	1.50242	1.65953	1.63019	1.65626	1.96529	1.1173	0.9331	0.69346	1.5051	1.54842	1.58587	1.6785	1.74685	1.44714	1.63997	1.75145	1.40605	1.22789	1.61318	1.73995	1.88807	1.69694	1.75952
YIL047C-A	2.31104	2.1121	2.14328	2.36388	1.96422	2.30905	2.55527	2.95387	2.51227	2.46116	2.45867	2.67909	2.85756	2.84158	2.49176	2.57735	2.86647	2.61708	2.94762	2.8452	2.76809	2.61138	2.5871	2.70508	2.61073	2.80822	2.70367	2.62459	2.6082	2.05952	3.3587	2.54374	2.59656	2.67766	2.42305	2.78982	2.85229	2.73878	2.54153	2.55415	2.71902	2.45591	2.55011	2.40482	2.37767	2.14391	2.75499	2.4927	2.52509
YAL016W	1.47622	1.74089	1.60581	1.77017	1.50424	1.6842	1.5422	1.32932	1.73067	1.79728	1.57762	1.42425	1.76129	1.73274	1.80851	1.91304	1.90912	1.72649	1.57078	1.35769	2.02817	1.7059	1.40156	1.11633	1.64656	1.48114	1.52484	1.52798	1.33259	1.65993	1.71866	1.40851	1.22044	1.25773	1.5511	1.3583	1.81632	1.35932	1.54589	1.26799	1.21829	1.55194	1.49094	1.63428	1.88886	1.83687	1.7833	1.57942	1.57298
YDR244W	-0.24598	-0.33101	-0.46805	-0.52375	-0.23575	-0.58437	-0.42582	-0.21945	-0.44261	-0.44196	-0.31276	-0.18215	-0.52776	-0.41884	-0.53221	-0.35124	-0.44963	-0.42753	-0.46004	-0.74536	-0.99579	-0.9411	-1.12098	-0.44727	-0.4814	-0.78528	-0.58799	-0.8033	-0.44598	-0.59661	-1.33747	-0.36787	-0.43472	-0.76137	-0.24558	-0.37941	-0.3138	0.09451	-0.86965	-0.49563	-0.58428	-0.66077	-0.69467	-0.66802	-0.3019	-0.30639	-0.08433	-0.38001	-0.29825
YER097W	-1.43931	-1.83507	-1.55285	-1.45261	-1.45132	-1.69432	-2.31908	-1.88092	-1.99149	-2.46045	-2.15505	-2.14949	-2.32861	-2.85995	-2.72962	-2.03315	-2.72507	-2.83061	-0.38342	-1.00693	-0.45197	-0.00096	-0.43957	-0.88247	-1.5723	-0.30119	-1.87897	-1.34465	1.81774	-2.29069	-1.68166	-2.75801	-1.0596	-0.89287	-0.08015	-0.49688	-1.35437	-1.22204	-0.13334	-0.21713	-2.51451	-2.3937	-2.55575	-1.96761	-1.54152	-2.36308	-1.46905	-1.71248	-1.2627
Q0275	2.54652	2.20527	2.45493	2.13287	2.87812	2.26053	3.68842	2.45932	3.59549	3.79891	3.50969	3.05904	4.14825	3.92698	3.93666	3.9326	3.33339	3.85132	1.27548	2.43231	1.96516	1.13091	2.43484	2.093	1.68027	0.81931	2.02239	2.53283	0.56185	1.2766	3.52729	0.89103	0.38592	-0.61878	1.42644	1.96756	1.41302	0.04667	1.67603	2.4787	2.32162	2.29004	0.8617	0.39699	2.18768	1.97055	1.83235	2.50968	1.76998
YMR239C	0.30267	-0.00505	0.70878	0.32287	0.67834	0.08586	0.74505	0.47146	0.29656	0.55235	0.50971	0.64478	0.13574	0.04572	0.22929	0.08787	0.15949	0.45631	0.34627	0.50162	-0.53537	-0.78941	-0.59573	0.63059	-0.19348	-1.07885	0.28622	-0.40591	0.30583	0.33061	-0.73526	0.71092	-0.00448	0.35509	0.3826	0.22657	0.00319	-0.27629	0.0644	0.62482	0.57715	0.17923	0.46758	0.10944	0.36707	0.57466	0.49281	0.29767	0.4962
YPR093C	-1.25084	-0.69231	-1.21294	-1.17519	-1.17649	-1.3628	-1.37554	-1.40337	-1.13729	-1.29938	-1.15348	-0.9061	-1.32125	-1.22568	-1.56187	-1.2902	-1.61761	-1.37071	-0.99627	-1.07087	-1.05433	-1.21532	-1.06295	-1.02857	-1.49222	-1.27933	-1.10166	-1.23575	-1.56276	-0.99679	-0.97784	-0.30498	-0.42783	0.10208	-0.83577	-0.92355	-1.25434	-1.17074	-1.24326	-1.33475	-1.35066	-1.36296	-1.21518	-0.08279	-1.27394	-1.28723	-1.34589	-1.52115	-1.03703
YLR163C	0.8597	0.80102	0.79286	0.43996	0.76643	1.07389	1.20216	1.15898	1.50092	1.13897	1.04151	1.0463	1.31219	1.21652	1.24287	1.40571	1.4587	1.29692	0.57216	0.38076	0.71382	0.74602	0.93821	0.88418	0.46551	0.30258	1.02284	1.03427	0.38466	0.92772	0.97056	0.63152	0.51341	0.09206	0.9131	0.88795	0.52489	0.66306	0.63176	0.66049	1.01978	0.83731	0.74701	0.54643	1.1235	1.02959	1.11497	1.03438	1.28407
YDL072C	2.11441	2.16464	1.9453	2.07864	1.66296	2.31852	2.0012	1.91869	1.74007	1.67762	1.7773	1.52631	2.22178	2.43365	2.19946	2.64932	2.46485	2.35865	2.01718	2.13149	2.33002	2.84575	2.59206	1.73983	2.28222	2.7298	2.01905	2.80683	2.14739	2.04791	2.54474	1.12171	1.76574	1.79304	2.136	2.06319	2.54227	2.58465	2.37088	1.59569	2.49482	2.56222	1.97768	1.85104	1.7771	2.25951	2.66925	2.79142	1.99138
YPL190C	1.92624	1.83794	2.00224	1.94214	1.90947	1.90212	1.87077	2.04587	1.7391	1.94188	2.02231	1.98863	1.83107	1.60361	1.82186	1.74106	1.74033	1.7839	2.09398	1.94096	1.79304	1.93904	1.95749	1.76207	1.83242	1.9681	1.71945	2.27098	1.9949	2.687	1.47252	1.84918	1.74323	2.02039	2.23692	2.17231	1.81509	1.75165	1.83319	1.87186	2.25533	1.96981	2.11001	1.78602	1.93812	2.46728	1.96435	1.86659	1.76255
YHR199C-A	-0.02799	0.01698	-0.00205	0.01301	-0.21993	0.00238	0.07501	-0.30531	0.11035	-0.54648	-0.16827	-0.10413	-0.65132	-0.85898	-0.77435	-0.55905	-1.08303	-0.91532	-0.17519	-0.0991	0.19821	0.21326	-0.08418	-0.81077	-0.38822	0.28844	-0.08735	0.07673	-0.19971	0.27328	0.51619	-0.20796	0.17916	-0.21501	0.37746	-0.08253	0.23635	0.07163	0.08999	-0.77136	-0.20148	0.11896	-0.31193	0.27356	-0.86466	0.08494	-0.28873	0.01031	0.00653
YBR207W	1.01978	1.05244	0.74801	0.81759	0.90408	1.06232	1.16591	1.45032	1.53902	1.54199	1.00168	1.46367	1.72404	1.56121	1.51209	1.75221	1.57551	1.71136	1.46463	1.39728	1.46605	1.60226	1.81943	1.18697	2.12599	2.86627	1.39118	1.51925	0.92474	1.22138	1.96689	1.36009	1.42478	1.56825	1.04834	0.94287	1.4475	1.85568	1.48848	0.79365	1.27938	0.97376	2.01353	2.34169	1.18305	1.06742	1.21608	1.01052	0.86666
YER059W	-0.16455	-0.19819	0.06878	-0.1353	-0.1732	-0.00139	0.11117	0.11059	-0.0364	-0.13291	-0.02609	-0.14979	-0.12094	-0.06455	-0.18776	-0.10031	-0.19507	-0.1447	-0.66787	-0.40168	-0.37989	-0.21682	-0.36811	-0.32727	0.01197	-0.37646	0.02341	0.12135	0.10526	-0.1663	-0.62125	-0.18846	-0.04322	-0.07842	-0.41177	-0.03893	-0.32613	-0.04568	-0.53709	-0.29207	-0.02643	-0.21089	-0.20187	-0.18791	0.24157	0.11032	0.02992	-0.00282	0.01921
YIL049W	-0.15927	-0.02835	-0.05129	-0.14216	-0.15838	0.07728	-0.36117	-0.10572	-0.76323	-0.75546	-0.7399	-0.76114	0.70607	0.53383	0.18369	0.57623	0.56997	0.54595	0.07204	0.50182	0.11776	0.54467	0.7537	0.26485	-0.48414	-0.04162	-0.72525	0.18803	-0.13627	0.11492	0.52444	0.15254	-0.3032	0.31023	-0.62012	-0.07978	0.53902	0.26471	0.79247	-0.44253	-0.03798	-0.11858	-0.21064	-0.26431	-0.10718	-0.53568	-0.38407	-0.10746	-0.52052
YBR069C	2.75181	2.52251	2.45684	2.48843	2.49155	2.61709	1.57852	1.08146	1.41503	1.73884	1.34262	1.48123	1.29877	1.20153	1.0741	1.01675	0.79655	1.13569	2.88237	2.77946	2.76907	2.55194	1.92973	1.6704	1.23023	1.76459	2.49013	2.66969	2.08009	2.01325	2.49527	2.20335	2.39141	2.46308	2.20927	2.29113	2.53707	2.17217	2.11766	1.91365	2.26548	2.03559	1.90654	2.06705	2.20548	1.98138	2.51204	2.31433	2.17859
YML073C	6.49964	5.82904	6.73938	6.17165	6.44022	6.11143	6.35584	6.37853	6.63764	5.98276	6.34628	5.99306	6.32536	6.21444	6.60116	6.03422	6.49981	6.26074	6.35541	5.86027	6.65499	5.80659	6.47295	5.70688	5.54338	5.80985	6.46601	6.27896	6.69033	6.09168	6.32548	6.35977	5.77752	6.33076	6.57979	6.18777	5.93143	5.79341	6.67589	5.48872	6.32383	6.36133	6.23077	6.17478	6.71806	6.33763	6.45483	6.34729	6.69211
YGL215W	2.86454	2.60198	2.78037	2.56127	2.48657	2.81985	3.31453	3.60715	3.34947	3.38484	3.52379	3.34916	3.24765	3.17426	3.22592	3.12129	3.29482	3.48291	3.5788	3.75467	2.61668	2.67693	3.30352	3.23746	2.76223	2.56562	2.49586	2.42273	2.84986	2.71752	3.93496	2.65683	2.67812	2.68371	3.61453	3.48732	2.50139	2.40084	3.08426	3.39716	3.18216	2.48405	2.54174	2.03737	3.02334	2.8026	2.74905	2.81534	2.88146
YLR084C	0.73173	0.58292	0.59113	0.59458	0.52758	0.7225	0.53074	0.09362	0.47776	0.47116	0.51486	0.46547	0.95941	0.83041	0.85298	0.89199	0.75374	0.81865	1.52283	1.2933	1.35339	1.11467	1.52916	0.90317	1.26458	1.26928	0.38871	0.61569	1.12496	0.7425	1.12357	0.63468	1.09138	1.04573	0.81445	0.72121	1.19308	0.978	1.95596	1.67241	0.4508	0.51055	0.67288	0.57285	0.56908	0.61209	0.69644	0.59489	0.36888
YPR066W	-1.77215	-1.3047	-1.59382	-1.64686	-1.71662	-2.01375	-1.45015	-1.50765	-0.966	-1.65106	-1.41105	-1.41904	-1.42834	-1.47822	-1.15391	-1.00434	-1.12074	-1.34944	-1.2992	-1.55651	-1.22733	-1.64313	-1.05947	-1.34048	-1.44196	-1.42257	-1.25915	-1.36382	-1.02884	-1.97777	-0.74427	-0.89352	-0.84585	-0.76163	-1.10517	-1.72106	-0.94695	-1.185	-1.35229	-1.50178	-1.42906	-1.47671	-1.5845	-0.62816	-1.52244	-1.78599	-1.26805	-1.65818	-1.54623
YNL202W	-3.20822	-2.76198	-3.09391	-3.49186	-3.17907	-3.57275	-3.9504	-3.60209	-3.73969	-3.94691	-4.02804	-3.62275	-4.26689	-3.77908	-4.04335	-4.13033	-4.2672	-4.02686	-2.72156	-2.73339	-2.15006	-3.05116	-3.32868	-4.33121	-3.12739	-3.34267	-3.21986	-3.01754	-3.89525	-3.36051	-3.55569	-4.22037	-4.5707	-4.2345	-4.11319	-4.10307	-2.02979	-1.8998	-3.78178	-4.15626	-3.49517	-3.90716	-3.27625	-3.54014	-2.52549	-3.24086	-2.77624	-2.31262	-3.42844
YOR135C	-4.39489	-4.6222	-4.72059	-4.28716	-4.44376	-4.44265	-4.66104	-4.87898	-4.56968	-4.88236	-4.91593	-4.55515	-4.4853	-4.81186	-4.87961	-5.55975	-4.87223	-4.68909	-4.95185	-4.44812	-4.65172	-5.05428	-4.23062	-4.49901	-4.97839	-4.52428	-4.74222	-4.4144	-5.16865	-4.30725	-3.82464	-4.82961	-5.2174	-4.43824	-4.49868	-4.54812	-4.93293	-4.33966	-4.62905	-4.21724	-4.66365	-4.52781	-4.11699	-4.37631	-4.73845	-5.1761	-5.09926	-4.27583	-4.52396
[truncated: 5,591 more rows]
[truncated: 147 more columns]
