# Supplementary material for: Genetic Architecture of Ethanol-Responsive Transcriptome Variation in Saccharomyces cerevisiae Strains
Source: Oxford University Press journal article supplement (doi:10.1534/genetics.114.167429), 2014-06-26
Supplement: genetics.114.167429-7.xls [file genetics.114.167429-7.xls]

## Sheet: EtOH Abundance
YORF	DBY_1	DBY_2	DBY_3	DBY_4	DBY_5	DBY_6	M22_1	M22_2	M22_3	M22_4	M22_5	M22_6	YPS_1	YPS_2	YPS_3	YPS_4	YPS_5	YPS_6	MS_1.3_1	MS_1.3_2	MS_2.1_1	MS_2.1_2	MS_3.2_1	MS_3.2_2	MS_4.3_1	MS_4.3_2	MS_5.4_1	MS_5.4_2	MS_6.4_1	MS_6.4_2	MS_7.4_1	MS_7.4_2	MS_8.2_1	MS_8.2_2	MS_9.3_1	MS_9.3_2	MS_10.2_1	MS_10.2_2	MS_11.2_1	MS_11.2_2	MS_12.4_1	MS_12.4_2	MS_13.1_1	MS_13.1_2	MS_14.2_1	MS_14.2_2	MS_15.3_1	MS_15.3_2	MS_16.2_1
YHR055C	5.4824	5.7318	5.74127	6.23909	5.54137	5.52691	4.55281	4.90021	4.97265	4.44794	4.34401	4.89413	1.05535	1.0538	0.78721	4.68476	0.44549	1.56762	6.23273	6.48834	3.67876	3.02249	5.56966	6.97951	4.68782	6.47244	5.0193	5.44968	6.25027	7.28017	6.73913	7.09967	5.66223	5.08073	6.32153	6.48949	4.52368	4.52217	4.41039	4.67007	6.06293	5.74127	6.95294	6.55373	4.97649	7.4246	6.36753	6.27742	5.95472
YPR161C	0.41658	-0.03137	0.33795	0.04109	0.34051	0.33252	-0.11337	-0.23404	0.05539	0.01111	0.07764	-0.15277	0.09255	-0.03831	-0.00441	-0.35497	-0.11233	-0.08436	0.03447	0.26814	0.15111	-0.08979	-0.27008	0.56085	-0.05014	-0.2461	-0.17736	-0.27635	0.26334	0.27358	-0.52567	-0.01631	0.30221	-0.00712	-0.1158	0.24138	0.09339	0.32706	-0.16574	0.58131	0.03689	-0.08301	-0.08946	-0.07508	0.3894	0.38144	0.31756	0.07576	0.15564
YOL138C	-1.16882	-1.15318	-1.15244	-1.26624	-1.02803	-0.96923	-1.06049	-0.86063	-0.84493	-0.96678	-1.11892	-0.9859	-1.07305	-1.06349	-1.17781	-1.13126	-1.24019	-1.35304	-1.00428	-0.82447	-0.82923	-0.79873	-1.06633	-0.81129	-1.00069	-0.96792	-1.45076	-1.4132	-1.05124	-1.08796	-1.29622	-0.93887	-0.91221	-0.59509	-1.31741	-1.01279	-0.91363	-0.70805	-0.93682	-0.74386	-1.07532	-0.78144	-1.08336	-0.61743	-1.22014	-0.98802	-1.19394	-0.95001	-1.17296
YDR395W	0.2672	0.06888	0.42476	0.44633	0.39248	0.49358	0.73656	0.34177	0.60078	0.59838	0.53352	0.7332	0.97932	1.17752	1.23969	1.17859	1.4242	1.07176	0.52736	0.2774	0.39741	0.06357	0.35632	0.59342	0.50301	-0.11344	0.38807	0.14335	0.49521	0.87185	0.44485	-0.13552	0.00842	-0.07957	0.5154	0.37485	0.65687	0.42806	0.40292	0.57957	0.95161	1.01719	0.37846	0.48397	0.35576	0.52097	0.86538	0.35702	0.67466
YGR129W	-2.59008	-2.10686	-2.13053	-2.38797	-1.99235	-2.31935	-1.92193	-1.41784	-1.48599	-1.47103	-1.22058	-1.52999	-2.22295	-2.76616	-2.63978	-2.40168	-2.96871	-2.47854	-2.5383	-2.0541	-1.32185	-1.77662	-2.28048	-1.41691	-1.9595	-2.13693	-1.48292	-1.74577	-2.28944	-1.70827	-1.33301	-1.18046	-1.6276	-1.23749	-2.23285	-1.93322	-1.85424	-1.25041	-2.20496	-1.80172	-1.27232	-1.90759	-1.78548	-1.24692	-1.80339	-1.67944	-2.36351	-2.09282	-1.81381
YPR165W	3.7046	3.49945	3.79384	3.89266	3.82721	3.93225	4.26712	4.17881	4.09748	4.24872	4.18567	4.23771	4.13022	4.45509	4.53793	4.29024	4.39694	4.34163	3.92794	3.85453	3.9282	3.81255	3.76421	3.86784	3.77754	3.8159	4.10587	3.56441	3.95399	4.04607	4.30297	4.09939	3.8298	3.2642	4.32202	4.11297	4.1103	3.99542	3.77275	3.9752	3.94052	4.24884	4.10032	3.99466	4.11975	4.10989	3.95034	4.13446	4.16119
YAL069W	-1.28156	-3.00495	-1.50598	-2.5565	-2.51587	-1.54887	-3.66987	-3.07705	-4.11852	-3.77247	-3.74614	-4.37719	-3.37442	-3.19119	-3.47892	-4.37167	-3.85418	-3.62472	-3.47684	-3.09131	-2.84198	-4.28046	-2.23587	-1.01387	-3.64981	-3.71516	-1.57031	-1.56239	-2.35156	-1.65538	-3.1053	-3.00175	-3.29927	-4.42058	-3.40734	-2.3888	-3.61163	-3.81525	-2.33772	-1.53578	-3.67536	-3.57732	-3.21358	-3.41017	-1.34993	-1.85993	-4.16454	-3.21514	-2.31468
YCL050C	3.79338	3.86052	3.92401	3.78425	3.80284	3.96424	3.49161	3.6765	3.44516	3.61344	3.34325	3.35879	2.94456	3.42307	3.43835	2.81644	3.43165	3.32081	4.22388	4.01691	3.48569	2.65237	3.01806	3.53683	3.41729	3.36857	3.33914	2.95388	4.11981	3.45415	3.89196	4.00948	4.14815	3.60024	4.52609	4.30082	3.46472	4.01685	3.53229	3.74675	3.75063	3.86239	3.91863	3.22872	3.79814	3.92015	3.83224	3.57851	4.06288
YPR098C	2.67954	2.65904	2.3406	2.53412	2.83401	2.46239	3.09726	2.89561	2.86156	2.60036	3.14382	2.80392	2.4875	2.48255	2.24464	2.49562	2.51333	2.67693	2.43857	1.94131	3.22086	3.29576	3.42562	2.51057	3.43006	3.27071	3.39999	3.39236	2.40606	3.00295	3.29918	2.44497	2.66117	1.62938	2.65376	2.44572	2.90635	2.53858	3.13486	2.46803	2.79596	3.00484	2.79611	2.58762	3.07013	2.79275	3.34066	3.06012	2.93978
YPL015C	2.32017	2.66899	2.50347	2.32704	2.52942	2.27311	2.50284	2.65093	2.61012	2.65926	2.72053	2.20256	1.86966	1.94917	1.86017	1.28379	1.85373	1.54622	2.58543	2.06999	2.28345	2.32525	2.58723	1.51274	2.43889	2.49045	2.29354	2.55643	1.99583	2.27131	2.90389	2.72879	2.73226	2.40311	2.5012	2.26211	2.43259	2.19219	2.66431	1.71308	2.25431	2.92475	2.75995	2.94608	2.16679	1.98103	1.84492	2.21515	1.97817
YMR193W	0.36035	-0.18435	0.35157	0.19026	0.37025	-0.01153	0.62226	0.83222	0.95577	0.87628	1.04645	0.39482	0.96056	0.42548	0.78691	0.32523	0.70691	0.76527	-0.55116	0.64827	0.57246	0.1656	-0.42144	1.12209	-0.24341	0.09881	0.60957	0.74253	0.13237	0.10023	0.8992	-0.16042	-0.35631	-1.12516	0.14474	0.48427	-0.70298	0.3445	-0.42418	0.92976	0.7525	-0.5078	0.4026	-0.9412	0.44745	0.14359	-0.08113	-0.13936	0.55391
YLR031W	-4.3197	-4.69798	-4.41145	-4.41546	-4.5061	-4.21695	-4.37939	-4.42379	-4.59203	-4.35216	-4.51633	-4.67709	-4.2125	-4.09338	-4.14632	-4.14593	-4.42531	-4.30879	-2.95176	-2.6361	-2.9112	-2.84511	-3.79251	-2.93439	-2.80957	-2.45944	-3.69722	-3.72251	-3.1007	-3.73928	-3.84034	-3.76197	-3.35191	-3.03483	-3.99026	-3.55497	-3.37045	-3.09581	-3.15735	-2.48064	-3.94363	-3.89895	-3.72477	-3.97006	-3.42338	-3.2717	-3.97024	-3.65496	-3.51215
YIL014C-A	-0.36997	-0.69421	-0.39404	-0.56888	-0.35077	-0.45149	-3.96154	-4.94974	-4.84902	-4.80109	-3.84142	-3.95811	-1.35308	-1.781	-1.69169	-1.18143	-1.41933	-1.26501	-0.3721	-0.75375	-1.04557	-1.0608	-4.23097	-4.07192	-3.97037	-4.13339	-4.28159	-3.98771	-0.69204	-0.13787	-3.56356	-3.99539	-4.14818	-3.47371	-1.38775	-1.51295	-0.63295	-1.48281	-3.97518	-3.71483	-1.17986	-0.92584	-3.86858	-3.95603	-3.74652	-0.61887	-0.25782	-0.56069	-0.39005
YGR053C	-1.71328	-1.25708	-1.55924	-1.41983	-1.37881	-1.40299	-1.6004	-1.13456	-1.57665	-1.10742	-1.55172	-1.48099	-2.58753	-2.33485	-2.58977	-2.03117	-2.26822	-2.45066	-2.35196	-1.6514	-1.86926	-2.02706	-2.11792	-1.91168	-1.57797	-1.59244	-1.82739	-1.72269	-2.46653	-1.81844	-1.22445	-1.04754	-1.71993	-0.95168	-2.1141	-2.01025	-2.11027	-1.30548	-2.27746	-1.89532	-1.23163	-2.1164	-1.93808	-2.35973	-1.74051	-1.62179	-1.39074	-1.38912	-1.66759
YCR101C	-0.4792	-0.42845	-0.40563	-0.18277	-0.40319	-0.4264	-1.17499	-0.83618	-1.26304	-0.99796	-1.19065	-1.22985	-2.78653	-2.0286	-2.59299	-2.2833	-2.30733	-2.19725	-0.52158	-0.93125	-1.2416	-1.06188	-0.94817	-1.2734	-0.43847	-0.73359	-0.71087	-0.89158	-0.99947	-1.26023	-0.55339	-1.23197	-0.69223	-0.72794	-0.56999	-0.7414	-0.77813	-0.65401	-1.50067	-2.1363	-1.62811	-1.34768	-0.34386	-0.88173	-1.28782	-0.6447	-1.45408	-0.78341	-0.93262
YER087C-B	3.31498	3.25093	3.47748	3.28982	3.34635	3.15954	3.82431	3.64351	3.66672	3.6858	3.98756	3.45075	4.40709	4.37644	4.42889	4.05703	4.37481	4.28435	3.60536	3.45047	3.3431	3.7229	3.75009	3.22675	3.64922	3.74711	3.83828	3.75427	3.25948	3.8686	3.7759	3.50905	3.45756	2.76013	3.56521	3.25515	3.69801	3.7054	3.90308	3.39501	3.40991	3.92014	3.54583	3.41708	3.448	3.65175	3.70488	3.29717	3.28869
YOR280C	-0.05702	-0.31947	-0.03552	0.12988	-0.12069	0.05422	-0.23843	-0.29113	-0.39903	-0.22307	-0.31179	-0.32275	-0.10664	-0.56236	-0.26564	-0.27348	-0.12371	-0.45406	0.00042	-0.21275	0.03368	-0.2273	-0.28019	-0.04906	-0.17853	-0.12943	0.07705	-0.00928	0.62887	-0.09129	0.0288	0.06722	-0.50716	-0.3871	0.03034	-0.2575	0.28166	-0.25434	-0.37903	-0.27544	-0.24721	-0.65423	-0.39372	-0.47089	0.08533	-0.05817	0.00342	-0.04377	0.14865
YGR097W	2.52849	2.5765	2.61771	2.29884	2.18994	2.40194	2.82102	3.27541	3.55714	2.95285	2.9319	3.07953	2.77043	2.91231	2.91002	2.03937	2.58335	2.6302	3.04528	3.19308	1.62647	1.79091	2.18354	1.88471	2.62494	2.72516	2.7675	2.79666	2.39506	1.90402	2.25746	2.57534	2.5215	2.35861	2.81186	2.86878	2.41073	2.37099	2.01944	1.69025	3.01739	3.05595	3.13685	2.78165	3.45744	2.02708	3.3634	2.71891	2.44753
YHR215W	1.92535	1.53549	2.37942	2.26029	1.84886	1.7701	0.82013	0.95261	0.94668	0.94162	0.86044	0.91393	-0.82014	-0.46507	-0.78336	-0.47053	-0.28552	-0.38786	3.51943	3.46897	1.17245	1.80888	0.8191	0.3685	1.59104	2.14136	1.85971	2.05004	4.50137	2.30128	2.89973	3.01407	1.35806	0.90618	4.11161	4.12696	0.91574	0.77389	0.69109	0.39246	0.46841	0.35208	0.3581	0.80178	0.73161	2.16885	1.26985	0.80735	1.29011
YKL025C	0.30563	0.20229	0.38258	0.37835	0.01122	0.45947	0.68246	0.65642	0.65486	0.7049	0.55213	0.49087	0.65539	0.65957	0.89833	0.58622	0.83934	0.98657	0.24214	0.86286	0.20908	0.27843	0.37918	0.25548	0.14825	0.25854	0.27859	0.14344	0.14682	0.14607	0.69539	0.28191	0.1361	-0.01204	0.46389	0.90186	0.74052	0.29999	0.35475	0.42555	0.72861	0.91795	0.06469	-0.11233	0.50332	0.13356	0.3676	0.96077	0.36831
YKR011C	2.12027	1.92612	2.03415	1.73436	2.11659	2.34675	2.37912	2.53543	2.43624	2.618	2.42532	2.27149	2.20395	2.3503	2.77439	1.87207	2.69469	2.78423	1.70613	2.23059	2.22699	1.74459	1.06885	1.793	1.70615	1.79891	1.75698	1.48915	1.96555	1.63526	1.79556	1.71731	1.65108	1.15687	1.99812	2.42181	1.80524	2.21363	1.56637	2.12455	1.91118	1.01477	1.46303	1.33486	2.78693	2.15131	2.4819	2.1768	2.40704
YEL004W	-0.71572	-0.7122	-0.8929	-0.65424	-0.65907	-0.63459	-0.90376	-0.83716	-0.7464	-0.66033	-0.78521	-0.91402	-0.41848	-0.33986	-0.46079	-0.35352	-0.32239	-0.48151	-0.72831	-1.01427	-0.88671	-0.76537	-0.24095	-1.1645	-0.59809	-0.89882	-0.68386	-0.40046	-1.58902	-0.76456	-0.50877	-1.09692	-0.79405	-0.79409	-0.90141	-1.05244	-0.92897	-1.23596	-0.64636	-1.05596	-0.77967	-0.62136	-0.9785	-0.90754	-0.98725	-0.99441	-0.69861	-0.39234	-0.7002
YJL200C	-0.96996	-0.82027	-0.49646	-0.38058	-0.58925	-1.0285	-0.27175	-0.94355	0.03716	-0.4185	-0.65491	0.19376	-0.42709	-0.52573	-0.18605	-0.5142	-0.53641	-0.58547	-0.44174	-1.14917	-1.61561	-1.62174	-1.55575	-0.91794	-1.12801	-1.94001	-1.18308	-1.38416	-0.82669	-0.40311	-0.23605	-0.66244	-1.16544	-0.9437	-0.23164	-0.34145	-1.05592	-1.6841	-1.06606	-1.02303	-1.12964	-0.37618	-0.99939	-0.95346	-1.23902	-0.95243	-1.19641	-1.45191	-1.13598
YLL027W	0.62443	0.56135	0.40699	0.28876	0.79017	0.39255	0.58288	0.64771	0.57219	0.4304	0.48914	0.63115	-0.05975	0.2979	0.20596	0.88455	0.24566	0.28106	0.84835	0.14763	0.92309	0.9224	0.48244	0.77159	0.31016	0.11816	0.5261	0.35514	0.42816	0.61549	0.51881	0.77004	1.07868	0.68105	0.71226	0.69461	0.84103	0.90444	0.54604	1.17528	0.19147	0.831	0.45731	0.34701	0.94636	0.42888	0.55029	0.2632	0.53021
YOR024W	-4.41658	-3.19781	-4.62695	-4.52768	-4.58269	-5.0358	-4.82253	-4.52403	-4.88817	-4.51971	-5.12287	-4.44479	-4.72735	-4.73461	-4.33202	-4.6606	-4.04227	-4.8534	-3.49519	-3.63596	-3.74249	-3.89736	-3.67659	-4.18006	-4.19843	-3.62813	-3.67599	-3.86295	-3.24509	-3.92742	-3.62838	-4.19962	-3.96732	-4.29815	-3.669	-3.95529	-4.35017	-4.0497	-3.70022	-3.97714	-3.89536	-4.26214	-3.26812	-3.30842	-3.73035	-3.94254	-3.96776	-3.9865	-3.47404
YLR045C	-0.03262	0.00164	0.0744	-0.20361	-0.04184	-0.12327	-0.68411	-0.75594	-0.59595	-0.67879	-0.58453	-0.48484	-0.27534	-0.52842	-0.32547	-0.45615	-0.49078	-0.51036	-0.87376	-0.52072	-0.41747	-0.30244	-0.44123	0.0858	-0.61121	-0.52445	-0.41676	-0.72465	0.06808	-0.17464	-0.62293	0.06133	-0.20715	0.21131	-0.79742	-0.46664	-0.81819	-0.2933	-0.25708	-0.04522	-0.2504	-0.41371	-0.33464	0.26704	-0.1001	-0.25258	-0.74494	-1.26901	-0.23564
YDR348C	2.00078	1.98704	1.87738	1.83184	2.06281	1.75635	1.42545	1.47799	1.59872	1.4361	1.45315	1.52522	1.39895	1.44949	1.54136	1.29983	1.47593	1.47213	1.68672	1.90661	1.41074	1.63062	1.6721	1.42605	1.6894	2.0669	1.64292	1.75374	2.0427	1.67253	1.09402	1.49594	1.63009	1.6981	1.82632	1.82761	1.59027	1.79514	1.78612	1.58133	1.36717	1.60689	1.84315	1.58181	1.48888	1.60891	1.52554	1.21858	1.67321
YPL183C	-1.17774	-1.03319	-1.02553	-1.05649	-0.63424	-0.7374	-1.06573	-1.16175	-1.05358	-1.04808	-1.12261	-0.69595	-0.15452	-0.16807	-0.35526	-0.22372	-0.03321	-0.27969	-1.01037	-1.24797	-0.97661	-1.23678	-0.78142	-0.25258	-1.2201	-1.51003	-1.15554	-1.21704	-1.55686	0.07563	-1.26107	-1.132	-1.07972	-1.51743	-1.23724	-1.06006	-0.95495	-1.2336	-0.82312	-0.52305	-1.00669	-0.81775	-1.32122	-1.08741	-0.87247	-0.24341	-0.92939	-1.40122	-0.91368
YGR003W	-2.14174	-1.70022	-1.81898	-1.56099	-2.15636	-1.7257	-1.57215	-1.67082	-1.62198	-1.48662	-1.87278	-1.4903	-1.95353	-1.66573	-1.59179	-1.50549	-1.71235	-1.62633	-1.94219	-1.60079	-1.71783	-1.91899	-2.41948	-1.92761	-1.81197	-1.92607	-2.1955	-2.07373	-1.18929	-1.43462	-2.27813	-1.56758	-1.77721	-1.39217	-1.69855	-1.69272	-1.56955	-1.48462	-1.90297	-1.62601	-1.64337	-1.62272	-2.0918	-1.77036	-1.93335	-1.3703	-2.20066	-1.73277	-1.85796
YEL008C-A	-3.05069	-2.12314	-2.27168	-2.36038	-2.63738	-2.62442	-2.68357	-2.54046	-2.99192	-2.64906	-2.60242	-2.58058	-3.07493	-3.11449	-3.47817	-1.97942	-3.35523	-3.09773	-2.51135	-2.59805	-3.00097	-2.50265	-1.82401	-2.74629	-1.39472	-1.62483	-2.60359	-1.78085	-3.19245	-1.64109	-2.64489	-2.3972	-2.11185	-1.26611	-2.38372	-2.31631	-2.48979	-2.50321	-2.10393	-2.54939	-1.73662	-1.72959	-2.31275	-0.77893	-1.71436	-2.36448	-2.00008	-2.33228	-2.27578
YBL095W	-0.30662	-0.64797	-0.39061	-0.33127	0.07291	-0.14552	-0.02868	-0.15586	-0.49398	-0.30467	-0.13148	-0.27221	-0.7141	-0.46449	-0.63987	-0.68948	-0.66474	-0.55091	-0.14527	-0.58932	0.28478	0.23418	-0.46863	-0.57983	-0.10223	-0.11267	0.20995	0.4846	-0.32873	-0.35039	-0.36462	-0.48486	-0.42356	-0.10651	-0.15417	-0.10511	-0.12636	0.05557	-0.05857	-0.4392	-0.71333	-0.04947	-0.06738	0.21388	-0.13055	-0.31686	-0.56334	-0.31859	-0.21159
YGL060W	-0.52352	-0.6071	-0.24538	-0.48215	-0.5387	-0.59658	0.09597	0.09149	0.11369	0.14268	-0.00548	0.06212	-0.60084	-0.39832	-0.30118	-0.28491	-0.50957	-0.76472	0.66468	0.62949	-0.07259	-0.22788	-0.84286	-0.96448	-0.86425	-0.79982	-0.62523	-0.79809	0.23797	-0.14035	-0.7336	-0.49069	-0.27972	-0.11587	0.13244	0.15909	0.04521	-0.1093	-0.91411	-0.94122	-0.43919	-0.41012	-0.10198	-0.08923	-0.2113	-0.16953	-0.0124	-0.04315	-0.14532
YLL007C	-1.1164	-1.22952	-1.14228	-1.01823	-1.13622	-0.9002	-0.81654	-0.67014	-0.73555	-0.71495	-0.91849	-0.84382	-1.06209	-0.88585	-0.92728	-0.88521	-1.05766	-0.86836	-0.89339	-1.18982	-0.80578	-1.08563	-1.13625	-1.22255	-1.00177	-1.23981	-0.88217	-1.14014	-1.04808	-1.43064	-0.97892	-0.96438	-0.75387	-1.20853	-0.98163	-1.17655	-0.6175	-0.90729	-1.11218	-1.26242	-0.71341	-0.79452	-0.69388	-1.16142	-0.75625	-1.27007	-1.06088	-0.67396	-0.89782
YEL009C	3.24528	3.0725	3.3657	3.26694	3.46161	3.56438	4.15765	4.02922	4.06345	4.20726	4.21154	4.2035	4.72704	4.69023	4.68144	4.64143	4.86183	4.61683	3.43957	3.35508	3.34073	3.08509	3.39122	3.85104	3.86315	3.31164	3.10288	2.83298	3.35593	3.50016	3.67564	3.01936	3.60926	3.69517	3.253	3.55863	3.85159	3.65751	3.73893	4.03358	4.03605	4.24476	3.42801	3.48282	3.62306	3.58376	3.84139	3.58833	3.22748
YEL015W	0.55796	0.42292	0.46472	0.55874	0.3183	0.69739	0.34579	0.66239	0.5707	0.43314	0.63409	0.57415	0.65642	0.43378	0.54122	0.23841	0.62029	0.33614	0.02276	0.56854	0.4515	-0.02253	0.05316	1.19605	0.28462	0.35671	0.43684	0.10494	0.22224	0.40722	0.23609	0.34583	0.48042	0.50074	0.33026	0.55702	0.24619	0.60222	0.33129	0.89223	0.52173	0.10786	0.26121	0.10565	0.8706	0.52806	0.58235	0.00641	0.55281
YOR083W	-1.35591	-1.20566	-1.40699	-1.35653	-1.56983	-1.60615	-1.20439	-1.20863	-1.24919	-1.2098	-1.15439	-0.85215	-1.51793	-1.58769	-1.68561	-1.73649	-2.02585	-1.64837	-0.98223	-1.41799	-0.43064	-0.64038	-0.61614	-0.86613	-0.13657	-0.65123	-1.18276	-1.2911	-1.25636	-1.03741	-1.41799	-0.89426	-0.26955	0.29024	-1.34004	-1.33125	-0.12117	-0.56251	-0.2544	-0.34964	-0.68766	0.02299	-0.39333	0.12619	-1.37672	-1.19129	-0.14682	-0.65233	-0.62481
YBR252W	0.0357	0.21157	0.47214	0.30141	0.39538	-0.20609	0.24965	-0.255	0.21647	0.04286	0.12623	0.34385	0.69486	0.68048	0.85202	1.07825	0.89636	0.52097	0.55522	-0.35761	0.19764	0.26311	0.7418	0.49674	0.38454	0.56105	0.28432	0.21048	0.46469	-0.05227	0.15898	0.07697	0.43521	0.97259	0.29922	0.24938	0.69745	0.42345	0.56387	0.14264	-0.15287	0.2334	0.2349	0.90302	-0.02099	-0.05893	0.45453	-0.4058	0.33711
YDR329C	0.24153	0.57423	0.22525	0.48573	0.12085	0.25034	0.42004	0.44143	0.64751	0.53831	0.58983	0.44943	-0.23122	-0.39547	-0.02485	0.09837	-0.23629	-0.25713	-0.25625	0.29555	0.48487	0.35807	-0.00772	-0.22906	0.28555	0.6245	0.18428	0.43902	-0.02064	0.02214	0.54517	0.45272	0.18471	0.34245	-0.25188	-0.14251	0.13894	1.01368	0.04463	0.09034	0.2984	0.081	0.20095	0.10707	0.28203	0.06596	0.31168	0.26083	0.13845
YDL202W	0.23241	0.05005	0.22075	0.25409	0.22564	0.12441	0.83834	0.81206	0.59865	0.74224	1.09353	0.89743	1.16763	1.05562	1.15303	1.15624	0.92863	0.82002	-0.03388	0.34322	0.44317	0.53012	0.76768	1.26022	0.0679	0.21765	0.2036	0.38016	0.15094	0.4846	0.63674	0.77255	0.32728	0.70926	-0.01131	0.50031	0.34033	0.57523	0.50349	1.0049	0.41853	0.30268	0.11189	0.45681	0.60418	0.21757	0.93412	0.65364	0.4204
YHR209W	-1.35675	-1.22218	-1.25399	-1.30775	-0.97765	-1.02569	-0.62421	-0.66914	-1.14888	-0.82966	-0.62791	-0.97383	-1.56494	-1.2483	-1.47169	-1.4309	-1.43155	-1.4864	-0.86618	-1.46127	-0.32439	-0.44649	-1.06342	-1.56731	-1.28971	-1.65572	-0.67702	-1.17236	-1.78241	-0.88169	-0.64904	-0.94941	-1.28817	-2.40468	-0.03648	-0.43684	-1.23012	-1.50294	-1.48297	-1.74865	-1.48116	-1.80658	-1.12752	-1.25237	-1.29907	-0.98855	-1.12428	-0.80027	-0.06492
YPR008W	1.50813	1.40401	1.75271	1.31845	1.65304	1.65877	1.30051	1.40064	1.57392	1.20621	1.3081	1.34425	1.28239	1.28783	1.39679	0.9949	1.18737	1.29052	1.43933	2.00222	1.51793	1.46971	1.47479	1.67893	1.20785	2.07271	1.4375	1.27302	1.86452	1.14788	1.16276	1.4699	1.66138	1.16383	1.49739	1.61572	1.32888	2.09076	1.24705	1.45071	1.38784	1.23976	1.39233	1.57919	2.19046	1.35515	1.69608	1.76088	1.58856
YER075C	-0.7841	-0.72387	-0.81567	-0.79403	-0.88436	-0.82626	-0.82907	-0.84728	-0.74233	-0.98072	-1.15196	-0.73487	-0.63643	-0.55835	-0.56315	-0.61122	-0.70229	-0.77083	-0.23772	-0.44573	-0.67959	-0.59043	-0.60334	-0.76728	-0.23386	0.10947	-0.62094	-0.55606	-0.19689	-0.60053	-1.1615	-0.19664	-0.17002	0.57841	-0.71111	-0.50705	-0.18368	-0.17535	-0.39029	-0.68747	-0.87553	-0.6956	0.07642	0.33703	-0.56939	-0.9547	-0.57203	-0.89738	-0.76452
YDL203C	-0.70992	-0.81933	-0.6792	-0.96242	-0.6731	-0.79105	-0.69793	-0.63527	-0.64983	-0.62763	-0.79887	-0.60418	-0.60639	-0.39918	-0.45705	-0.67189	-0.58008	-0.54958	-0.22142	-0.47596	-0.55492	-0.27562	-0.41501	-0.50546	-0.5035	-0.61141	-0.66069	-0.7158	-0.80471	-0.73675	-0.72938	-0.8543	-0.26482	-1.03438	-0.42159	-0.50647	-0.48433	-0.63893	-0.44573	-0.45393	-0.72646	-0.40928	-0.62657	-0.54716	-0.5951	-0.78224	-0.60377	-0.66949	-0.82293
YBR050C	-2.06275	-1.61851	-1.90848	-2.02876	-1.85119	-1.91569	-2.21522	-2.11318	-2.48486	-2.28238	-2.27389	-2.24405	-2.66193	-2.80207	-2.83613	-2.69308	-3.13776	-2.87013	-1.26787	-1.29565	-1.56313	-1.38407	-1.48337	-1.4225	-1.73549	-1.54904	-1.22759	-1.48889	-1.37849	-2.21835	-1.26466	-0.34752	-1.62335	-1.58354	-1.26014	-1.25288	-1.44643	-1.4346	-1.96052	-1.70847	-1.93402	-2.03047	-1.67211	-1.63971	-1.44425	-1.9373	-3.04281	-1.89426	-1.93004
YMR197C	0.98276	0.91777	0.97279	0.79533	0.71635	0.89217	0.86398	0.6705	0.91808	0.96245	0.94577	0.7305	0.88894	0.44285	0.4773	0.47854	0.66735	0.696	0.30734	1.48804	1.45682	1.23975	0.67871	0.4565	0.87273	1.08524	0.92303	1.10747	1.29737	1.15955	0.94605	0.77773	0.73902	0.23907	0.72944	0.78157	0.58276	1.33154	0.51385	0.78678	1.22797	0.68149	0.75158	0.90697	1.59859	1.03596	0.9711	1.14566	0.9465
YDR261W-A	6.96844	7.07082	6.26208	6.66045	5.8909	7.04295	5.64647	5.59488	5.82722	5.92197	5.71404	5.31447	2.80987	2.00282	2.51467	1.01885	1.86078	1.7863	6.08996	7.55029	5.74857	6.97843	6.04501	7.323	6.29778	6.80113	6.28549	6.66695	6.44716	7.51844	5.04949	5.1096	6.72874	5.36003	6.25477	7.40845	6.08003	6.958	6.38403	7.60316	6.38042	5.68089	6.63157	6.7738	6.766	7.41385	6.45623	5.39481	6.33936
YDR134C	4.33944	4.3466	4.20522	4.49198	4.43092	4.35174	5.18762	5.27642	4.93605	5.15438	5.10703	5.07353	5.80616	6.06908	5.99648	5.91371	6.04682	5.30482	5.3949	4.91171	5.5292	5.76318	5.86578	5.03598	6.0687	6.42959	6.47362	6.42145	5.07354	3.84572	6.57752	5.3416	4.98502	4.90347	4.62154	4.62723	5.31738	5.46017	5.0945	4.57554	6.46552	6.82919	5.15808	4.83463	5.28298	4.04302	6.45436	6.41456	5.31772
YBL049W	-2.77258	-2.20374	-2.6555	-2.7371	-2.81789	-2.79471	-2.28293	-2.23834	-2.47535	-2.1288	-2.41781	-2.25987	-2.89924	-3.31275	-3.17694	-2.70858	-3.00207	-3.02365	-1.76195	-1.85899	-1.72912	-1.20782	-1.36961	-2.44295	-1.21039	-1.59579	-1.70589	-1.29781	-2.44999	-2.08167	-1.28788	-2.00052	-2.04229	-2.70214	-2.10774	-2.62869	-2.06279	-2.10012	-1.87423	-2.21435	-1.60055	-1.16988	-2.09263	-2.25817	-2.21383	-2.45028	-1.72967	-0.80137	-2.34334
YER054C	-0.40355	-0.35009	-0.58984	-0.42266	0.01379	-0.34088	1.1997	1.44573	1.28916	1.42934	1.32761	1.38132	-0.90657	-0.74861	-0.50921	-0.44457	-0.52743	-0.43575	0.22624	0.76015	1.80441	1.68934	1.17077	0.65648	1.62189	1.36404	1.71731	1.25636	-0.85251	-0.98687	1.07793	1.38763	1.11629	1.09689	-0.45309	-0.32369	1.54806	2.23226	0.9305	0.74209	1.5773	0.79963	0.23688	-0.43458	1.50714	-0.41429	1.78751	1.47225	1.34336
YDR305C	0.25146	-0.04716	0.53274	0.26121	0.15165	0.17187	0.10949	-0.00358	0.08265	0.28925	0.23732	-0.1465	0.27285	0.32943	0.30396	0.19027	0.37326	0.14074	-0.45933	-0.23956	0.26841	0.0856	-0.17937	-0.03509	-0.18309	0.32615	-0.03628	0.23438	-0.04186	-0.30597	-0.17856	0.0463	0.05658	0.46743	-0.44637	-0.13993	0.12904	0.01393	-0.14534	0.37859	-0.23116	-0.49012	-0.46526	-0.23082	0.42499	-0.15282	0.04008	0.05777	0.26763
YHL019W-A	-4.06829	-3.68624	-4.05762	-4.35459	-4.36499	-4.48844	-4.19227	-4.35504	-4.51697	-4.56437	-4.33185	-4.00652	-3.94055	-3.83651	-3.99137	-4.38809	-4.13645	-4.0021	-3.79515	-3.73711	-3.80738	-3.84558	-3.32964	-3.92073	-3.36595	-3.25826	-3.78305	-3.80194	-3.55179	-3.95507	-3.79653	-3.76197	-3.66623	-3.87953	-3.63551	-3.69889	-3.74617	-4.01773	-3.37686	-3.52537	-3.75039	-3.86761	-3.9069	-4.15156	-3.88042	-3.96572	-3.46908	-3.55484	-3.93148
YNL201C	-0.67812	-0.43513	-0.53948	-0.49949	-0.68892	-0.48473	-0.65868	-0.56079	-0.65919	-0.48183	-0.69211	-0.74926	-0.71148	-0.55627	-0.49428	-0.57528	-0.66721	-0.49886	-0.76225	-0.16992	-0.83847	-1.08163	-1.17453	-0.40524	-0.91934	-0.98839	-1.10935	-0.91281	-0.83154	-0.66274	-1.31119	-0.78506	-0.66287	-0.98569	-0.99044	-0.82952	-0.80599	-0.43323	-0.72346	-0.29968	-0.46626	-0.62529	-1.04272	-0.98294	-0.6843	-0.44755	-0.56914	-0.55411	-0.58285
YHR180W-A	2.31813	2.03488	2.34361	2.55459	2.7762	1.13959	2.1758	2.56715	3.06775	2.23589	1.93016	3.40049	2.72965	2.25106	2.95304	1.98018	1.35535	1.66283	1.92411	1.23052	2.00427	1.73632	3.13732	1.84232	-0.3294	2.40217	3.72755	2.66705	1.10004	2.50443	2.99988	2.90848	2.16649	1.95637	3.20592	2.55543	2.81375	1.15266	3.10475	2.586	1.78388	2.68934	3.16128	1.21541	1.62678	3.27865	0.0794	1.62162	2.02865
YCR061W	3.09146	3.08636	2.57172	2.77608	2.85404	3.04542	3.82514	3.72722	3.4492	3.69605	3.89258	3.53295	3.35038	3.21428	3.01174	3.21644	3.13555	3.34204	2.59248	1.91574	3.61699	3.94232	3.69627	2.32852	3.73244	3.29507	3.7358	3.97141	2.88789	3.5056	3.59116	3.13132	3.48643	3.07203	2.48092	2.39408	3.52493	3.10689	3.57372	2.96183	3.43445	4.01259	3.71207	4.21577	3.5334	3.09154	3.89596	3.78519	3.18856
YBR206W	1.23568	0.78371	1.24112	1.20035	1.31009	1.15537	1.591	1.40689	1.21676	1.28573	1.41071	1.49736	1.70318	1.95375	1.86231	1.90718	1.88344	1.63371	1.75056	1.33929	1.59829	1.49622	1.58517	1.57255	1.50471	1.16807	1.57488	1.06725	1.55056	1.31773	1.49184	1.02414	1.24751	0.75773	1.64671	1.35921	1.58604	1.33175	1.74344	1.56198	1.33285	1.3773	1.57819	1.15705	1.01611	1.29939	1.6669	1.30524	1.67165
YHR051W	2.32804	2.05657	2.47325	2.59676	2.1853	2.61523	3.86626	3.9167	3.82565	4.10131	3.75242	3.49829	4.1005	4.39676	4.3051	4.10679	4.37679	3.84522	2.54183	2.64389	3.13618	3.08098	2.64488	2.79028	2.19611	1.84928	3.29955	2.93487	3.09163	2.98558	3.19412	2.85577	2.2344	1.74289	2.36163	2.49786	2.89886	2.52555	2.49363	2.46635	3.29135	3.32842	2.76275	2.1605	3.18186	3.33331	3.03791	2.86557	3.1068
YDL116W	0.35134	0.05243	0.36481	0.45762	0.42558	0.57036	0.0905	0.20309	0.1515	-0.02342	0.04121	0.01432	0.18208	0.37071	0.39587	0.11745	0.36833	0.30777	0.16156	0.18576	0.25648	-0.04552	-0.41525	0.08068	-0.1876	-0.27275	-0.02899	-0.02815	0.18566	0.09087	-0.05172	-0.66063	-0.23561	-0.97555	0.15444	0.37042	-0.01101	0.26676	-0.2169	0.17466	0.26138	0.05756	0.01525	-0.40532	0.39157	0.06227	0.17233	0.05524	0.31699
YPL171C	-3.76513	-2.95224	-3.41461	-2.83114	-2.79905	-3.20391	-0.94342	-0.93036	-1.32367	-0.7738	-0.88278	-0.6072	-3.16859	-2.8941	-3.0448	-2.17548	-2.87361	-2.93407	-1.50339	-2.28203	-1.13551	-0.78146	-0.96962	-1.3736	-2.48712	-2.00904	-0.96732	-0.90138	-3.03475	-2.10296	0.35511	-0.492	-1.47592	-1.89442	-2.45818	-2.1613	-2.82051	-2.91692	-1.49631	-1.61957	-2.81069	-2.04734	-1.46868	-1.59243	-3.05023	-2.31377	-3.39648	0.91377	-2.53388
YPR124W	2.44535	2.60549	2.41817	2.49019	2.14715	2.51516	2.30758	2.8788	3.01049	2.61118	2.93792	2.62566	2.22686	1.88643	2.1685	0.30489	1.95041	1.79486	2.19583	2.77046	2.06365	1.79675	2.62303	2.13234	2.80576	3.03314	2.11533	2.09674	2.5604	2.7755	2.44165	2.78756	3.04194	2.92199	2.52287	2.22631	2.38073	2.83786	2.21841	0.71358	2.48584	2.80581	2.27786	2.34993	1.15277	2.51857	2.72479	3.11586	2.27597
YJL023C	-1.84654	-1.72498	-1.53099	-1.64343	-1.67967	-1.30904	-1.69989	-1.35494	-1.57532	-1.56803	-1.72663	-1.72696	-2.15593	-1.79987	-1.87521	-1.93742	-1.75909	-2.20248	-2.0649	-1.45782	-1.80194	-1.94826	-2.47684	-1.94397	-1.82933	-1.81887	-1.78143	-1.47933	-2.10999	-2.17836	-1.5569	-1.88939	-1.68468	-1.4514	-1.83984	-1.81913	-1.95248	-1.56962	-2.23734	-1.82594	-1.50945	-2.52122	-1.68989	-2.26366	-1.29927	-1.63957	-2.01427	-1.44391	-1.39943
YGL167C	2.16876	2.21993	2.06897	2.30255	2.13057	2.18799	2.77114	2.75394	2.69226	2.63766	2.61537	2.68889	2.86813	2.94142	2.86617	2.83864	3.08732	2.81549	2.32395	2.41351	2.22451	2.39393	2.41002	2.11566	2.72349	2.55213	2.13538	2.15253	2.05296	2.49381	2.48808	2.17566	2.18003	2.10278	2.34922	2.46805	2.5863	2.6575	2.67403	2.4029	2.50771	2.63197	2.21897	2.38692	2.34135	2.58268	2.39699	2.30414	2.23013
YDL165W	0.72631	0.4185	0.81298	0.55854	0.5969	0.67673	0.71667	0.75588	0.64625	0.67456	0.51936	0.43053	0.58372	0.66421	0.76124	0.54931	0.87057	0.49832	0.4452	0.32707	0.4136	0.36981	0.28052	0.33794	0.20332	0.45024	0.70188	0.6581	0.61194	1.13148	0.61581	0.07881	0.09563	0.19462	0.46909	0.38911	0.87284	0.35748	0.14301	0.31733	0.59115	0.41434	0.56972	0.36928	0.69557	0.71727	0.58514	0.45948	0.59497
YLR154C-H	-2.31879	-4.85006	-4.11998	-3.92477	-3.48452	-4.43948	-4.12744	-4.28098	-2.74698	-4.09557	-4.65724	-3.58783	-3.44999	-3.53487	-2.75763	-4.60445	-5.10816	-3.12894	-2.18449	-3.36415	-2.69041	-3.25931	-3.55971	-2.83307	-3.05132	-3.39925	-1.72503	-2.93116	-1.94193	-3.652	-1.59073	-2.76592	-1.83032	-3.55413	-1.67923	-2.88441	-2.07772	-2.56348	-3.55751	-3.56113	-2.90561	-3.82163	-2.52785	-2.84773	-3.88476	-2.87963	-2.5589	-3.22531	-1.55322
YIL143C	0.79172	0.83932	0.72571	0.8558	0.69168	0.783	0.58021	0.73218	0.56155	0.59263	0.56342	0.52879	0.64073	0.88822	0.86767	0.8493	0.89728	0.93499	0.61039	0.91108	0.62896	0.48152	0.46469	0.47698	0.22225	0.01549	0.34525	-0.04312	0.50621	0.28259	0.1693	0.50262	0.70087	0.55787	1.10826	0.9873	0.61737	0.62773	0.57507	0.64479	0.88674	0.86859	0.4226	0.09714	0.76714	0.54734	0.72079	0.87223	0.8391
YPL119C-A	-0.20023	-0.5149	-0.50036	-0.00863	-0.03182	-0.03895	-0.1388	-0.25921	-0.42801	-0.12151	-0.7204	-0.61517	-3.48194	-3.01984	-3.3048	-2.80968	-3.53784	-2.84161	-1.03182	-0.32926	-0.80651	-0.27241	-0.62379	-1.53288	-0.58046	-0.12288	-0.43675	-0.01514	-0.89613	-0.76125	-0.63503	0.0546	-1.66982	-2.95837	-0.48821	-0.24165	-0.3749	-0.70086	-0.43891	-0.83571	0.51273	0.29454	-0.33952	-2.31215	0.02537	0.47029	-1.1898	0.44829	-0.67338
YBR292C	-3.10564	-3.71879	-3.60615	-3.99798	-3.56311	-3.81935	-3.93122	-4.02041	-2.91052	-3.5712	-3.58165	-3.59158	-3.52359	-3.28233	-3.3961	-3.28911	-3.86728	-3.05349	-3.37836	-3.07671	-2.69156	-3.33864	-2.97937	-2.97818	-2.8979	-3.50766	-3.58847	-3.31744	-2.97683	-3.11071	-2.98324	-2.42854	-3.22658	-2.18967	-3.73122	-3.27437	-3.06494	-3.11194	-3.30707	-3.0131	-3.57958	-2.68516	-2.99902	-3.16389	-3.24961	-3.28665	-3.56158	-3.23073	-3.6615
YGR240C	3.91376	4.07811	3.86859	4.03873	4.07191	4.10579	4.50219	4.48488	4.53552	4.38949	4.54173	4.44556	4.90475	4.98825	4.79261	4.87047	5.02284	5.24415	4.46069	4.45995	4.06182	4.02993	4.27046	4.08406	4.59117	4.27213	4.43731	4.48323	4.24472	4.53755	4.71336	4.70504	4.43327	4.80279	4.20772	4.14221	4.35447	4.17986	4.29185	4.16766	4.3538	4.68768	4.52603	4.79609	4.55813	4.47516	4.7493	4.64164	4.25745
YOR094W	-0.15607	-0.31699	-0.28256	-0.45696	-0.33909	-0.36375	-0.79036	-0.59851	-0.5826	-0.7097	-0.4175	-0.55803	0.06464	-0.16872	-0.15458	-0.53715	-0.26013	0.06602	-0.71172	-0.81249	-0.64005	-0.86867	-1.08943	-0.41326	-0.80039	-0.80453	-0.99123	-0.62146	-0.45428	-0.71614	-0.52133	-1.03797	-0.67751	-1.20902	-0.7987	-0.47891	-0.92249	-0.40049	-0.8507	-0.20031	-0.6214	-1.3666	-0.37111	-0.65617	-0.19704	-0.53041	-0.82283	-0.9323	-0.46473
YDR167W	-0.50137	-0.15898	-0.27884	-0.26873	0.05363	-0.41114	-0.44415	-0.09859	-0.26048	-0.11579	0.05804	-0.11912	-0.15292	0.08013	-0.0853	0.14921	-0.186	0.28022	-0.93605	-0.7931	-0.11941	-0.04025	-0.51501	-0.05326	0.03474	-0.16955	-0.26543	-0.12795	-0.41283	-0.07473	-0.14723	0.1625	-0.10359	0.83867	-0.62074	-0.44075	-0.37854	-0.06505	-0.22013	-0.17874	-0.09625	-0.7058	-0.03829	0.29058	-0.37801	-0.08862	-0.14648	-0.78489	-0.25471
YBR063C	-1.22744	-0.76603	-0.92854	-0.86267	-0.97656	-0.97189	-1.37633	-1.20207	-1.23632	-1.32566	-1.4368	-1.23529	-1.78906	-1.62704	-1.58516	-1.26154	-1.81973	-1.68385	-1.05334	-0.89221	-0.90691	-1.32025	-1.48953	-1.33358	-1.1409	-1.47348	-1.18385	-1.2131	-0.99848	-1.01132	-0.97758	-0.41334	-0.61807	-0.82001	-1.25774	-1.22451	-1.46366	-1.16781	-1.53157	-1.39871	-1.30475	-1.30616	-1.07792	-1.38737	-0.90891	-0.80761	-0.66973	-0.91384	-0.85541
YER052C	3.153	3.09698	3.07347	3.41333	3.34971	3.17784	3.32552	2.81955	3.24958	3.41297	3.19492	3.19838	3.83	4.08917	3.55844	3.19791	3.80953	3.43245	3.24367	3.20408	1.82846	2.39285	3.10938	2.41544	2.67246	2.42828	2.54937	2.7716	3.09201	3.13121	3.41946	3.24294	2.52452	2.78794	3.52723	3.60174	2.28687	2.3298	3.02895	2.44159	3.47115	4.18008	3.47271	4.10507	2.42612	3.26961	3.37578	3.70693	2.81584
YPL118W	0.79134	0.92075	1.2023	1.01722	0.98566	0.84741	1.45119	1.67763	1.39019	1.4884	1.58956	1.59669	1.76913	1.6855	1.88841	1.64228	1.7855	1.7776	0.81896	0.96233	1.33582	1.38086	1.4607	1.52005	0.86728	0.99683	1.03252	1.01	1.10956	1.80556	1.33072	1.215	1.01064	0.72095	1.02646	1.134	0.99309	1.47724	1.12392	1.30103	1.53676	1.04266	0.90095	0.7075	1.33778	2.26935	1.23933	1.26	1.04741
YGR178C	1.71936	1.68591	1.70166	1.57535	2.04947	1.85618	1.97691	1.94404	1.90902	1.92967	2.12244	1.84015	1.94201	1.99456	2.08186	1.86793	1.90615	2.04311	2.08872	2.24764	2.30481	2.01853	1.91795	2.54276	2.01737	1.92011	2.0426	1.56075	1.43088	1.60664	1.7409	2.29324	2.16549	2.12716	2.01758	2.11136	2.08154	1.77481	2.13278	2.54696	1.84348	1.8811	1.56868	1.24964	2.19025	1.94882	2.20568	1.99182	2.05302
YPR187W	1.57452	1.45566	1.79877	1.43808	1.95264	1.77264	1.81499	1.59821	2.04193	1.7239	1.84755	1.79818	2.39274	2.16533	2.46914	2.14713	2.38164	2.4806	1.89261	1.5802	1.81639	1.5371	1.48337	2.5561	1.60814	1.74615	1.647	1.45381	1.79373	1.87898	1.84469	1.49689	1.50928	1.15067	1.84667	2.12894	1.69076	1.85363	1.64812	2.40625	1.70619	1.50712	1.57501	1.33396	2.03705	1.52028	1.84449	1.09879	1.95084
YOL141W	-3.62781	-3.44317	-3.17041	-3.00171	-3.23423	-3.32677	-2.92644	-3.0069	-2.96194	-2.89753	-3.26666	-2.20432	-3.23416	-3.2688	-3.06676	-2.45512	-3.25792	-3.26784	-2.86176	-2.71737	-3.10145	-2.87421	-2.97131	-2.46502	-3.17732	-3.13041	-3.03053	-2.97219	-3.0149	-2.41528	-2.7852	-2.37538	-3.36932	-2.22225	-3.04038	-2.65005	-2.56786	-2.76876	-2.70749	-2.54452	-2.43601	-2.27201	-2.64224	-2.04567	-3.08163	-2.66459	-3.06382	-3.12316	-2.975
YJL065C	0.49883	0.5683	0.5839	0.32021	0.40239	0.55405	0.54329	0.52387	0.35708	0.43557	0.54716	0.53547	0.70073	0.40453	0.57011	0.76469	0.6298	0.48135	0.42999	0.16747	0.91575	0.60262	0.635	0.74512	0.53474	1.02425	0.26636	0.6902	0.22064	0.6718	0.61205	0.51311	0.69842	1.64013	0.33076	0.22574	0.72932	0.85983	0.51987	0.60898	0.30314	0.28092	0.59561	0.98774	0.83632	0.45628	0.81352	0.30543	0.36478
YPR086W	0.86369	0.80373	1.00211	0.9498	1.06272	0.80643	0.92785	0.92269	1.02546	0.92571	0.91229	0.9335	0.73612	0.78783	1.10008	0.78258	0.89133	0.81048	0.59514	1.33046	0.7299	0.54019	0.32619	1.03225	0.92271	1.05535	0.71	0.79821	0.9421	0.68153	0.71824	0.94338	0.68235	0.78972	0.85715	1.01637	0.36322	0.60649	0.62526	1.297	0.81217	0.33569	0.60355	0.7669	0.90791	0.84471	1.15352	0.57346	0.70407
YBR122C	0.95908	0.72279	1.29274	0.77874	1.10712	1.12316	1.7667	1.83727	1.42904	1.7407	1.82319	1.45992	2.00533	2.03134	2.43273	1.51759	1.90709	1.94262	1.19885	1.54268	1.46716	1.60662	1.15598	2.03896	0.73613	0.88745	1.11716	1.27699	0.92314	0.1876	1.3433	0.41489	0.80945	-0.16105	1.28846	1.23125	0.71314	1.16925	0.80214	1.38503	1.41285	0.97214	0.79718	0.18771	1.17659	0.8554	1.3084	1.66821	1.60592
YBR271W	-2.0743	-1.98818	-1.70255	-1.78552	-1.90936	-1.83401	-1.78759	-2.03906	-1.926	-1.95406	-2.12078	-1.7065	-1.95385	-1.87854	-1.68818	-1.22899	-1.88321	-1.97398	-1.88924	-1.67655	-1.88004	-2.02385	-2.02771	-1.54295	-2.22639	-2.12497	-1.79085	-2.19288	-1.86914	-1.62201	-2.00541	-1.42666	-1.92911	-2.7296	-1.68086	-1.53916	-2.07828	-1.93198	-1.72285	-1.58233	-1.61891	-1.36986	-1.91124	-1.83451	-2.0707	-1.76474	-2.21094	-1.74659	-1.53944
YBR279W	1.12804	0.91885	1.04417	0.93937	0.59257	1.11675	0.50264	0.53297	0.54436	0.64861	0.81415	0.56586	0.78771	0.27487	0.5233	0.27707	0.35321	0.51436	-0.1589	1.08582	0.11677	0.18677	-0.15601	0.60172	0.42008	0.486	0.30391	0.33266	1.10475	0.66363	0.41457	0.69777	0.42028	-0.07022	0.43866	0.95024	-0.34383	0.23079	0.26442	0.82115	0.79869	0.1415	0.50616	0.4947	0.40562	0.86422	0.107	0.04083	0.40225
YHR095W	-4.88849	-0.6721	-4.59259	-4.84542	-4.7266	-4.62553	-4.54281	-4.56298	-4.73785	-4.86177	-4.60693	-5.00167	-5.09167	-4.68338	-4.7156	-4.62089	-4.81495	-4.42209	-3.61471	-3.94227	-3.91645	-4.14793	-3.9532	-3.71931	-3.79551	-4.10295	-4.16703	-4.03562	-1.73334	-4.44631	-3.90982	-4.23191	-4.07037	-3.62573	-4.15144	-4.07564	-3.75951	-4.09138	-3.76069	-4.09933	-4.11019	-3.73108	-3.78724	-3.93046	-4.1014	-3.41339	-3.969	-4.43514	-3.87832
YMR221C	0.59042	0.48871	0.37164	0.53273	0.26148	0.29557	0.64045	0.52146	0.77758	0.49679	0.67238	0.46097	1.13129	0.96857	0.80455	0.99578	0.97696	0.76329	0.48682	0.14165	0.55542	1.07952	0.95518	-0.02329	0.67589	0.5645	0.65706	1.28125	0.51767	0.97576	0.85242	0.00811	0.33306	0.59684	0.39956	0.23235	0.68296	0.18975	0.90208	0.01719	0.65467	1.3153	0.92616	0.95867	0.34679	0.56384	0.67685	0.50163	0.1702
YJL221C	-1.70852	-1.26432	-1.46344	-1.30205	-1.32328	-1.53035	-1.61177	-1.51405	-1.44508	-1.44359	-1.56736	-1.58819	-2.17247	-1.78787	-1.78291	-1.42839	-1.92961	-1.93536	-1.02536	-1.05486	-1.75557	-2.01325	-1.64792	-1.47615	-1.8548	-2.07512	-2.24011	-1.99186	-1.75796	-1.38982	-1.26626	-1.36235	-1.27846	-1.61101	-1.10188	-1.21434	-1.67758	-1.70701	-2.27821	-2.11211	-1.84898	-2.04734	-2.22443	-2.44478	-1.79404	-1.49954	-2.58228	-1.3631	-1.69514
YDR241W	-4.42686	-4.01497	-4.12305	-3.84243	-4.62371	-4.08865	-4.33242	-4.14725	-4.05494	-3.56747	-4.40359	-4.82474	-4.67207	-4.0624	-4.19146	-3.80683	-3.31983	-4.68926	-4.17129	-3.61013	-3.83577	-3.89213	-3.86827	-3.18656	-4.23124	-3.78068	-3.6579	-3.67727	-3.84139	-3.49761	-3.75847	-3.96233	-3.52278	-3.89542	-3.86741	-3.87308	-4.22798	-3.3998	-4.16972	-3.41492	-3.75976	-3.43389	-3.88168	-3.58461	-3.58831	-3.51588	-4.37854	-3.70704	-3.7951
YER130C	-0.30004	-0.75045	-0.46887	-0.28081	-0.33812	-0.16793	-0.79811	-0.66752	-0.90301	-0.88571	-0.76088	-0.88407	-0.53274	-0.51237	-0.58557	-0.55768	-0.33127	-0.31245	-0.91825	-1.10114	-0.59169	-0.78812	-1.0356	-0.75408	-0.59647	-0.78215	-1.2388	-1.27921	-0.59408	-0.08145	-1.32368	-0.33868	-1.11274	-0.07957	-0.33927	-0.48437	-0.48036	-0.54249	-0.75736	-0.415	-1.01389	-1.06198	-0.84459	-0.63326	-0.93839	0.05096	-0.85	-0.41147	-0.59464
YBR155W	-1.03013	-1.02756	-1.02229	-1.22433	-1.07598	-1.28704	-1.4079	-1.58152	-1.01831	-1.35578	-1.092	-1.1538	-1.20521	-1.52524	-1.52902	-1.32479	-1.58533	-1.32287	-1.35075	-0.78928	-1.42244	-1.88207	-1.74515	-0.82422	-1.40053	-1.53714	-1.18385	-1.55688	-0.743	-0.87592	-0.9391	-0.85389	-1.26486	-1.24261	-0.6175	-0.65004	-1.90793	-1.31086	-1.6123	-0.90358	-0.97876	-1.49291	-0.97207	-1.20723	-1.44502	-0.852	-1.38495	-1.85107	-1.00812
YDR363W	-0.89337	-0.82047	-0.83548	-0.82096	-0.73585	-0.51801	-0.84628	-0.72799	-0.83094	-0.47093	-0.6481	-0.78955	-1.22967	-1.19514	-1.40748	-1.35595	-1.40499	-1.54144	-0.80325	-0.26664	-0.20998	-0.45148	-1.13843	-0.15748	-0.60935	-0.679	-0.74476	-0.52043	-0.82675	-0.69804	-0.34627	-0.62196	-0.39077	-1.06022	-0.87957	-0.6089	-0.91966	-0.21688	-0.94704	-0.19557	-0.57498	-0.92232	-0.60122	-0.55709	-0.46383	-0.45156	-0.79067	-0.45295	-0.34413
YPL147W	-2.02429	-1.68314	-1.82421	-1.6363	-1.95237	-1.57652	-1.15435	-1.20157	-1.39533	-1.14284	-1.48509	-1.45534	-2.38021	-2.17834	-2.10655	-2.0018	-2.2563	-2.25574	-1.37047	-1.25417	-0.96107	-1.03874	-1.43833	-1.58007	-1.4128	-1.44993	-0.65569	-0.57375	-1.85653	-1.06373	-1.39004	-1.23696	-2.01454	-2.1275	-1.81008	-1.53305	-0.71728	-0.88759	-1.37404	-1.35301	-1.58716	-1.93596	-2.02428	-2.1318	-1.09517	-1.03391	-2.04839	-1.04948	-1.02732
YGR266W	0.0384	-0.23353	-0.16695	-0.06697	0.1342	-0.02947	0.93408	0.89712	0.81166	0.83655	0.84356	0.57456	0.50262	1.02276	1.05792	0.78255	0.89603	0.78638	-0.21187	-0.11749	0.65613	0.57997	-0.02307	-0.11982	-0.32247	-0.06526	0.42743	0.35835	0.73058	0.25461	-0.15641	-0.15523	0.10161	-0.52194	-0.16241	0.13587	0.28974	0.18124	-0.37314	-0.4933	0.40344	0.33477	0.53395	0.36472	1.0757	0.77036	0.27694	0.40578	0.73929
YLR443W	-0.50366	-0.23541	-0.54042	-0.43847	-0.45707	-0.41652	-0.07819	-0.06737	-0.0903	-0.0635	0.02491	0.03066	-0.10485	0.00149	-0.25163	-0.18074	0.16568	-0.0316	-0.44013	-0.84944	-0.56916	-0.21693	0.06668	-0.96171	0.02463	-0.29356	-0.52335	-0.19124	-0.86151	-0.35285	-0.14653	-0.352	-0.08107	-0.76443	-0.24163	-0.37605	-0.15249	-0.48111	-0.0279	-0.53766	-0.11284	0.34212	-0.33979	-0.02358	-0.74688	-0.68737	-0.21503	-0.13439	-0.83746
YAL034C	1.70212	1.60283	1.90045	1.82705	1.6509	1.64557	2.24584	2.23492	1.59354	1.78095	1.70582	2.05926	0.77945	0.79302	1.3314	1.09582	1.06957	1.22038	2.08853	1.99002	2.30252	2.4113	1.81598	1.04785	2.10369	2.48172	2.46541	2.30018	2.13207	1.68765	2.11489	1.48048	1.65178	1.04729	1.94951	1.43606	2.20136	2.19285	1.59053	0.96969	2.27693	2.56672	2.29896	1.78454	2.11988	1.45539	2.19487	2.65021	2.07819
YBR067C	5.17325	5.40742	5.18278	6.00206	5.51676	4.87683	4.55657	3.98541	4.61384	4.67908	4.55104	4.3946	1.00705	0.55241	0.51323	0.42067	0.64273	0.83587	5.99579	5.47301	5.60981	5.69557	5.88893	4.8195	5.24623	7.14046	6.30875	6.66229	5.40018	4.54791	6.19637	5.96903	6.18738	6.80282	5.31112	5.00508	5.65642	5.53577	5.75347	5.05786	5.17653	6.59102	5.84795	6.64358	4.87304	4.50855	6.68036	6.48082	6.14205
YCR095C	-0.39404	-0.50912	-0.01588	-0.19275	-0.45125	-0.36605	-0.87835	-0.82875	-0.79409	-0.88011	-0.947	-0.79307	-0.67504	-0.71208	-0.69721	-0.76691	-0.91822	-0.84569	-1.12931	-0.25222	-1.0662	-0.74169	-1.16075	-0.80125	-1.02998	-0.80528	-1.00617	-0.50033	-0.25188	-0.88141	-0.84185	-1.43039	-1.09752	-2.60103	-0.78974	-0.52554	-1.1182	-0.80075	-1.09872	-0.68045	-0.75696	-1.04579	-0.82008	-0.9387	-0.39332	-0.68875	-1.03292	-0.21826	-0.94213
YLR270W	2.31225	2.36053	2.30526	2.36307	2.43816	2.61424	2.8058	3.16132	2.66441	2.9088	2.88887	2.86469	2.28659	2.72038	2.78331	2.30522	2.97952	2.5691	2.62152	2.57347	3.31604	2.87058	1.98236	2.55989	2.40012	2.20952	2.85222	2.41835	2.73146	2.16953	2.19299	2.22667	2.71166	1.83884	2.66502	2.50484	2.77354	3.12952	2.03801	2.49125	2.68832	2.46869	2.28043	1.51611	3.13809	2.76168	2.98101	3.21859	3.16804
YPR084W	-0.03904	0.10488	0.20127	-0.23677	0.14335	0.03238	0.08124	0.16073	0.03791	0.12538	0.12087	0.14437	0.1742	-0.00982	-0.09655	0.06178	-0.14475	-0.30556	0.31028	-0.07075	0.43553	0.55471	0.34542	0.01503	0.1819	0.54128	0.00525	0.09014	0.01895	-0.07111	-0.08454	0.20102	0.11267	0.50082	-0.18609	-0.07813	0.27065	-0.05408	0.44958	0.20342	-0.09378	0.4739	0.11091	0.35043	0.04308	-0.14668	-0.01783	0.33554	0.06525
YBR184W	-3.17354	-2.83878	-2.69342	-2.94872	-3.08745	-2.53385	-3.50026	-3.06881	-3.47104	-2.99549	-3.18604	-3.30075	-3.32291	-3.38452	-3.46168	-3.55881	-3.35718	-3.33674	-2.79481	-2.24977	-2.74491	-2.84362	-3.32962	-2.31444	-2.93957	-3.03654	-2.89002	-3.00993	-2.8199	-2.77568	-2.87331	-2.84512	-2.63772	-2.7179	-3.26003	-2.70797	-2.88326	-2.42376	-2.85984	-2.24481	-2.60897	-3.73722	-3.15581	-3.48969	-2.41581	-2.7371	-2.97511	-2.73023	-2.54758
YMR113W	-1.07503	-0.338	-0.29798	-0.33511	-0.36794	-0.68716	-0.54662	-0.80407	-0.93242	-0.96311	-0.75705	-0.47289	-0.75269	-0.5061	-0.64131	-0.68183	-0.94144	-0.70187	-0.18841	-0.44489	-0.36813	-0.44376	-0.28298	-0.66165	-0.89754	-0.46023	-0.49961	-0.55216	-0.32765	-0.38118	-0.90927	-0.37036	-0.35648	-0.31211	-0.44352	-0.5317	-0.53965	-0.93886	-0.54784	-0.86192	-0.9636	-0.79177	-0.68717	-0.40463	-0.6524	-0.61504	-0.83276	-0.76495	-0.4446
YGR035C	-1.77303	-1.00128	-1.47423	-2.03167	-1.62581	-1.76455	-2.11473	-2.76111	-2.05211	-2.24075	-2.54803	-1.86828	-2.59416	-3.12779	-2.45837	-1.89049	-2.63948	-2.56993	-1.14951	-1.8882	-2.73725	-2.48765	-2.10932	-1.54314	-2.13651	-2.40155	-2.24072	-2.74701	-1.33056	-1.27046	-2.0972	-0.84499	-1.19853	-0.36494	-1.63607	-1.38352	-1.17533	-1.52429	-1.92359	-2.08854	-2.28973	-1.7362	-1.20016	-1.06952	-1.08686	-1.28621	-2.53007	-2.67487	-2.30877
YDL222C	0.56788	0.7524	-0.09256	0.8048	1.22718	1.23028	4.75238	5.33829	4.19074	5.27376	4.86053	4.8987	0.72686	1.18218	1.33417	1.3033	1.48008	1.38832	1.98062	1.32948	5.21551	5.14113	5.22251	2.49236	5.17662	4.69125	5.27736	4.57653	1.45012	2.03098	4.62801	3.3025	4.42367	3.75148	0.50051	0.75292	4.48309	4.36342	3.86542	2.01225	4.69554	5.77743	2.973	3.07793	3.90278	2.28597	5.75171	6.13861	4.48249
YCL008C	1.74983	1.70646	1.71916	1.50832	1.55836	1.83845	1.61126	1.63972	1.282	1.69157	1.51371	1.83517	1.52664	1.38616	1.45257	1.03538	1.23939	1.34249	2.17448	1.49458	1.66693	1.54526	1.98273	1.49948	1.88309	1.36046	2.01344	1.41494	1.9584	1.60964	1.93858	1.78048	2.40389	1.68476	2.04357	1.64982	2.13069	1.79083	2.06753	1.63028	1.77572	2.34886	2.1295	1.89573	1.77772	1.51146	2.02581	1.64038	2.0372
YEL065W	-0.58727	-0.72992	-0.62314	-0.72401	-0.64664	-0.46336	1.66619	1.63689	1.83544	1.44135	1.74281	1.78802	2.37936	2.04777	2.2502	0.08095	2.39291	2.22751	-0.13423	-0.0794	0.54202	0.9323	1.00016	0.11321	2.17974	2.53503	1.06582	0.88546	-0.11096	1.53493	0.5812	0.53494	0.36212	0.56759	-0.16684	-0.07535	1.33754	1.52032	1.57111	-0.40831	0.94833	1.55676	2.04856	2.21677	-0.32181	0.85328	0.87828	-0.22432	-1.24138
YNL335W	-2.64383	-2.33945	-2.52928	-2.4479	-2.57223	-2.51225	-2.05896	-1.73153	-2.27247	-1.94204	-2.2278	-1.98535	-2.29163	-2.00416	-2.79573	-1.90063	-2.50308	-2.416	-2.10286	-2.20089	-2.62178	-2.18067	-1.70895	-2.54619	-2.6036	-2.40095	-2.5433	-2.16464	-3.17351	-3.07173	-1.47739	-1.50275	-2.047	-1.74798	-2.17113	-1.91451	-3.62312	-3.18066	-2.25083	-2.51143	-2.76702	-2.61783	-1.53896	-1.55612	-2.38114	-2.80435	-1.79547	-1.04504	-2.55843
YMR296C	2.33007	1.98959	1.96562	2.20021	2.24298	2.10315	2.5124	2.47408	2.28532	2.34529	2.65797	2.47026	2.95952	2.71009	2.5838	2.48537	2.57261	2.54669	2.62335	1.86655	2.42451	2.65189	2.83656	2.54435	2.77567	2.58709	2.59037	2.25308	1.91567	2.52032	2.21618	1.85543	2.71884	2.26049	2.18919	2.05222	2.61216	2.40473	2.97469	2.6513	2.41164	2.77618	2.53527	2.92329	2.1184	2.39013	2.64794	2.09768	2.27862
YDR232W	2.02472	2.00264	1.85505	2.09034	1.94097	1.72124	2.61988	2.32142	2.46191	2.51736	2.52654	2.55355	3.32698	2.86828	2.93045	3.4363	3.07244	3.00107	3.06381	2.70027	1.94303	2.20424	2.97917	2.47362	2.73758	2.34764	2.57863	2.53787	2.69656	2.45408	3.2212	2.96389	2.82701	2.92022	2.98732	2.62449	2.78331	2.45748	2.69735	2.43304	2.8103	3.249	2.83448	2.97396	2.09872	2.07374	2.87115	2.03952	2.38143
YGR190C	-4.30438	-4.25026	-4.26975	-3.96664	-3.81285	-3.95616	-3.3889	-3.74054	-3.71152	-3.61879	-4.07529	-4.53176	-4.19274	-3.73059	-3.13543	-2.69855	-2.42001	-3.30596	-3.78878	-3.49573	-3.6016	-3.32956	-2.54255	-3.25893	-2.74134	-3.05518	-3.03131	-4.16664	-3.63721	0.41537	-4.32495	-3.39779	-3.83984	-2.77421	-3.83782	-3.16407	-3.21614	-2.97454	-3.78746	-3.49261	-3.22277	-3.46069	-3.73933	-4.32337	-2.80636	-3.12352	-2.6191	-3.77483	-3.8925
YHR116W	0.65201	0.78035	0.83332	0.52205	0.65395	0.60499	1.16404	1.43285	1.37313	1.34823	1.2838	1.32289	1.67098	1.79922	1.66502	1.46034	1.50998	1.62866	1.14006	0.5424	1.2917	1.21451	0.91265	1.1266	0.62527	0.65384	1.46824	1.3746	0.9676	1.08511	1.19912	1.55285	0.85065	0.90487	1.10326	1.10521	1.29348	1.28371	0.6968	1.17713	0.89534	0.85487	0.66933	1.02447	0.62656	1.1022	1.26669	0.84821	1.43454
YDR313C	0.44542	0.17028	0.3973	0.58568	0.28985	0.20344	0.25927	0.37105	0.17159	0.51539	0.38619	0.32645	0.46572	0.4095	0.42989	0.50621	0.09718	0.42575	0.56947	0.42586	0.09556	0.23806	0.36774	0.22795	0.29429	0.5678	0.52229	0.44903	0.81904	-0.03861	0.56938	0.55126	0.2867	0.63876	0.64737	0.08162	0.46578	0.42872	0.29305	0.06777	0.45422	0.45204	0.54681	0.22965	0.15962	-0.08939	0.42511	0.49626	0.00458
YFR018C	0.66614	0.64534	0.08981	0.6022	0.51967	0.29714	0.29718	0.37018	0.29794	0.27221	0.46596	0.46299	0.21599	0.17908	-0.13172	0.43261	0.27368	0.035	0.35239	-0.2412	0.53657	0.03869	1.10211	-0.09539	1.13618	0.47021	-0.14553	-0.33751	0.03063	0.6544	0.12136	0.40159	1.1009	1.60286	0.19118	-0.06227	0.64455	0.12994	1.15079	0.57753	0.4402	1.25632	0.99189	1.65092	-0.64193	0.38705	1.12248	0.54895	0.18647
YKL007W	2.4248	2.0366	2.42947	2.37217	2.31771	2.52146	2.02941	1.94153	1.96771	1.81227	2.07774	1.70078	2.23969	2.27113	2.52013	1.96657	2.17688	2.42303	2.05615	2.54589	2.50839	1.93466	1.26697	2.2041	1.9981	2.05556	2.07584	2.14371	2.27002	1.86432	2.24338	1.88053	1.57349	1.13957	2.524	2.45561	2.28543	2.55224	1.60369	1.99341	1.74259	1.21573	1.97882	0.9222	2.85589	2.22745	2.08885	2.50419	2.73617
YIL048W	1.055	1.08212	0.95957	1.03335	0.78533	1.08083	1.06372	1.02827	0.93463	0.91378	0.84358	0.88443	1.10853	1.17779	1.21358	1.28665	1.32502	1.24776	0.56092	0.85447	0.70835	0.95989	1.0311	0.40941	1.22559	0.89022	0.76938	1.08335	0.56277	1.09606	0.95485	0.60985	0.44064	0.5101	0.72001	0.91796	1.06164	0.96433	1.05019	0.65753	1.13446	1.25184	0.84376	0.82349	0.81976	1.01751	0.91289	1.33943	0.4511
YDL213C	-0.5776	-0.97008	-0.46092	-0.51823	-0.68241	-1.22657	-0.87202	-1.48316	-0.31929	-0.90483	-0.60711	-0.47449	-0.34127	-1.03765	-0.98835	-0.58271	-1.59824	-0.80864	-0.76005	-0.20831	-1.31869	-1.31466	-0.62331	0.09901	-0.70165	-0.61986	-0.80701	-1.19357	0.3695	-0.20525	-1.09483	0.02465	-0.90156	-0.41725	-0.66363	-0.42056	-1.04629	-0.65743	-0.72798	-0.39167	-0.66617	-1.23977	-0.03237	-0.1308	-0.89294	-0.35763	-1.54831	-1.54105	-0.82191
YDR443C	-0.17522	-0.28465	-0.25171	-0.5362	-0.33436	-0.2803	-0.12514	-0.16421	-0.33056	-0.17729	-0.31877	-0.16206	0.01567	0.04624	0.00573	-0.08321	-0.00656	-0.20164	-0.05375	0.00384	0.20028	0.14996	-0.23903	0.14137	-0.1069	-0.08095	-0.41729	-0.54318	-0.15831	-0.5675	-0.44806	-0.16258	-0.13991	0.00516	-0.51306	-0.21892	0.11251	0.0386	0.00095	0.29671	-0.14289	-0.08428	-0.37636	-0.14585	-0.07733	-0.51431	-0.41001	-0.30982	-0.39412
YNL292W	-0.10824	0.00837	0.0381	-0.27976	-0.0462	-0.17878	-0.11119	-0.09935	0.09174	-0.16052	-0.06379	0.07241	0.18125	-0.02741	0.11025	-0.06789	-0.20856	-0.0027	-0.59872	-0.33373	-0.35116	-0.09727	-0.20538	-0.10732	-0.64308	-0.24479	-0.19994	-0.19814	-0.25343	-0.04704	-0.66148	-0.42062	-0.65331	-0.38967	-0.29224	-0.21879	-0.63838	-0.55199	-0.25995	0.00686	-0.29483	-0.41747	-0.30118	0.09378	-0.10093	-0.03713	-0.22301	-0.78402	-0.07703
YKL183C-A	-4.24807	-3.02635	-3.98498	-4.11624	-4.40885	-4.92326	-4.06636	-4.68626	-4.92892	-4.2649	-4.92306	-5.21269	-4.99458	-4.68262	-4.91911	-4.32327	-4.66577	-4.73699	-3.85819	-3.25375	-4.19466	-3.62663	-3.53618	-3.52093	-3.12272	-2.47369	-4.56721	-3.98791	-3.0906	-4.19827	-4.13768	-3.63766	-3.75257	-3.4249	-3.98572	-3.78619	-3.61783	-2.87598	-4.20021	-4.02644	-3.78461	-3.84438	-3.42734	-3.52469	-4.018	-3.74428	-4.04151	-4.14044	-4.25204
YOR324C	-0.67276	-0.74468	-0.64545	-0.79304	-0.868	-0.78147	-1.34065	-1.14189	-1.31466	-1.03467	-1.37371	-1.20766	-0.99994	-1.05396	-1.0948	-0.89333	-1.01745	-1.29505	-0.28588	-0.37333	-0.66407	-0.4794	-0.14389	-0.70845	-0.35591	-0.53737	-0.75041	-0.27906	-0.30447	-0.8944	-1.22316	-0.56469	-0.35269	-0.3885	-0.54401	-0.77955	-0.29346	-0.31713	-0.24117	-0.70311	-0.92194	-0.43828	-0.75913	-0.26909	-1.08046	-0.93653	-0.84093	-0.64869	-0.95104
YKL100C	1.93971	1.93326	1.7347	2.05599	1.84447	2.13335	2.57359	2.67692	2.37341	2.5827	2.45422	2.24934	2.252	2.26909	2.23006	2.41717	2.4195	2.15555	1.64793	1.76726	2.32922	2.90744	2.73089	1.59607	2.70317	2.73497	2.18388	2.64529	1.60798	1.60225	2.5406	1.49514	1.33657	0.89277	1.61169	1.81256	2.31078	2.0991	2.53628	1.75501	2.4908	2.73651	1.88046	1.89055	1.74779	1.67778	2.22117	2.82163	1.50115
YNL134C	2.91389	2.99393	3.07241	3.0449	3.16507	3.28013	3.29102	3.27475	2.90836	3.18059	3.18208	3.16675	3.36555	3.64057	3.67384	3.51615	3.43613	3.64407	3.07593	2.81976	3.30681	3.4375	3.16717	2.88201	2.5901	3.27544	3.58142	3.20928	2.73655	2.6266	3.7871	3.72178	2.66062	2.26822	2.61046	2.26886	2.62175	2.03477	3.47282	3.77548	2.87825	3.49298	3.42336	2.98319	3.28062	2.92031	2.04267	3.84912	2.96595
YOR192C-B	5.19589	5.28959	5.07327	5.51944	5.15426	5.60778	4.30688	4.85141	4.83684	4.49685	4.39661	4.40386	1.51266	1.70085	1.5438	1.09566	1.22903	1.46179	5.25939	6.56628	5.08132	5.19315	5.08234	5.91444	5.39346	5.62387	5.03776	5.52213	5.58422	6.03201	3.90118	4.14328	5.16994	5.06743	5.32801	5.73571	5.30375	5.48737	5.45262	6.42965	4.87733	4.03192	5.38207	5.04117	5.78725	6.24359	4.99326	4.34434	5.37735
YPL021W	-4.60953	-4.55428	-4.8555	-4.85522	-4.89073	-5.00938	-4.43594	-4.37125	-4.36453	-4.23542	-4.44852	-4.28193	-4.43703	-4.57904	-5.19976	-4.67883	-4.51513	-4.24216	-3.82523	-4.08133	-4.01795	-3.78234	-3.69222	-3.84309	-3.79584	-3.65781	-3.68074	-3.98771	-3.76453	-4.21097	-4.21318	-3.94783	-3.92396	-3.96253	-3.77424	-3.78356	-3.64081	-3.50553	-4.13964	-3.93828	-3.61188	-3.89895	-3.83215	-3.62415	-3.70501	-3.99421	-3.50887	-3.62988	-4.00309
YIL146C	-0.61417	-0.72462	-0.5355	-0.66225	-0.51503	-0.74553	-0.30686	-0.3589	-0.58017	-0.49635	-0.6113	-0.42539	-0.56701	-0.53498	-0.44571	-0.29546	-0.5921	-0.40731	-0.38339	-0.49752	-0.33196	-0.04485	-0.03472	-0.94128	-0.0582	-0.17905	-0.22139	-0.354	-0.41853	-0.31087	-0.17321	-0.37577	-0.50931	-0.45945	-0.97073	-0.82907	-0.14845	-0.59532	-0.38498	-1.06163	-0.23524	0.25219	-0.24243	0.00931	-0.66403	-0.67016	-0.57301	-0.06405	-0.68438
YIL171W	-2.33371	-4.24996	-3.46513	-3.97397	-3.45563	-3.64358	-4.34014	-4.18782	-4.64271	-4.57569	-4.57073	-5.33195	-4.2125	-4.31811	-4.20053	-4.33915	-4.14947	-3.88006	-3.65359	-3.5172	-2.61876	-4.0922	-2.17989	-4.11503	-2.44668	-3.50027	-2.66953	-3.98771	-2.53902	-3.23033	-3.75433	-4.39718	-2.94523	-4.09613	-2.70775	-3.29317	-3.18275	-4.0792	-2.38336	-4.1481	-3.48907	-3.61421	-2.69492	-3.52511	-2.75603	-3.23725	-3.70572	-3.66785	-3.57288
YNL218W	-1.09822	-0.64666	-0.82096	-0.93189	-1.03776	-1.12953	-0.82579	-0.82682	-0.79832	-0.76854	-0.9595	-0.5228	-0.88941	-0.89622	-0.82087	-0.99828	-1.158	-1.09956	-0.90005	-0.58465	-1.29882	-1.16128	-1.03191	-1.04632	-1.27999	-1.16139	-0.81382	-0.6963	-0.45767	-0.61118	-0.92304	-0.44441	-0.88321	-0.33471	-0.6762	-0.50401	-1.18488	-0.85726	-1.03395	-0.93129	-1.14467	-1.08856	-0.62212	-0.66301	-1.18234	-0.49624	-1.29822	-1.05178	-0.81173
YIL121W	2.39651	2.39437	2.23987	2.18007	2.44626	2.38148	-1.01647	-1.09543	-1.17866	-1.20565	-0.99322	-1.09804	-2.42992	-2.6624	-2.71686	-2.25072	-2.57745	-2.32629	1.53204	0.98456	-1.25168	-1.17326	2.94949	2.79357	2.7698	2.12457	-0.42849	-0.10452	-1.52487	-0.80675	2.49561	2.02437	2.42038	2.50625	2.04587	2.0318	2.83854	2.47072	2.96027	2.62471	2.59862	2.99128	-1.18596	-0.59794	-0.98016	-1.12321	3.05828	2.3577	-0.80351
YDL167C	-1.52189	-1.32563	-1.16559	-1.30891	-1.14952	-1.09837	-1.17346	-1.45763	-1.17727	-1.32359	-1.54072	-0.93232	-0.86547	-0.82112	-0.8324	-0.58198	-0.83918	-0.87803	-0.68958	-1.39645	-1.27741	-1.6497	-1.06912	-0.28589	-1.34345	-1.65296	-1.42803	-1.93633	-1.10357	-0.84065	-1.5173	-0.88295	-1.10953	-0.2769	-0.96162	-0.80677	-0.8265	-1.21737	-0.90472	-0.40361	-1.04673	-1.04263	-1.29533	-0.74865	-1.30467	-1.19669	-1.36154	-2.10181	-1.03583
YNL228W	-3.75739	-3.66283	-3.79074	-3.83472	-3.53362	-3.91851	-4.50722	-4.04714	-3.64308	-4.16892	-4.03626	-4.58205	-4.53514	-4.14778	-4.12795	-4.32278	-4.1377	-4.1332	-3.59996	-3.47653	-3.53666	-3.60493	-3.36111	-3.51339	-3.23597	-2.58181	-3.36716	-3.11715	-3.32709	-3.63966	-3.69875	-3.9188	-3.16965	-3.65838	-3.61431	-3.62413	-3.21871	-3.43113	-3.13991	-3.43738	-4.05912	-3.96791	-3.40527	-3.5903	-3.55942	-4.00933	-3.59722	-3.90478	-3.66556
YPL214C	-0.78226	-0.63892	-0.722	-0.78517	-0.39166	-0.6958	-0.30118	-0.18863	-0.39096	-0.20775	-0.43599	-0.32486	-0.41674	-0.41383	-0.41539	-0.24612	-0.09324	-0.04698	-0.40086	-0.84588	-0.42824	-0.53752	-0.80692	-0.58791	-0.17823	-0.58409	-0.61869	-0.87799	-0.97726	-0.00318	-0.21204	-0.54041	-0.18402	-0.03854	-0.51924	-0.91169	-0.32349	-0.58224	-0.62141	-0.54682	-0.49038	-0.44463	-0.46297	-0.65908	-0.84854	-0.00602	-0.53088	-0.50639	-0.70396
YOR228C	0.42584	0.4013	0.03541	0.47499	0.12741	0.12963	0.52953	0.5479	0.45935	0.55514	0.32235	0.34597	0.15331	0.53573	0.12583	0.50283	0.52127	0.35074	0.54249	0.04196	0.04614	0.56524	1.15994	-0.29662	0.87504	0.56189	1.00662	1.45667	-0.19066	0.33579	1.29643	0.50176	0.58222	0.25087	0.37622	0.22705	0.59255	0.37827	0.73126	-0.26785	0.73918	1.16562	0.52608	0.45826	0.23153	0.01979	0.7193	0.97484	0.30317
YBR270C	-1.3691	-0.97206	-1.15771	-1.45202	-1.27077	-1.07506	-1.30096	-1.07019	-1.4262	-1.22623	-1.4118	-1.22218	-1.63144	-1.34786	-1.72454	-1.31503	-1.5598	-1.46635	-1.41587	-1.48501	-0.98852	-1.00444	-1.42401	-1.66256	-1.32733	-1.43249	-1.11426	-1.50074	-1.50272	-1.67233	-1.69417	-1.07386	-1.35301	-1.12104	-1.57106	-1.54098	-1.04963	-1.15162	-1.48259	-1.41772	-1.33612	-1.22995	-1.75863	-1.17063	-0.98146	-1.41667	-1.24451	-0.85823	-1.12503
YEL063C	1.96146	1.9515	1.76048	2.09611	2.0451	1.9423	1.99619	1.71271	1.92757	1.73066	1.93276	1.8725	2.07644	1.9865	1.72108	1.91849	1.8015	2.01085	1.91317	1.40028	1.62784	2.20949	2.28132	1.84725	2.0089	1.95024	2.06364	2.09643	1.86368	2.04607	2.33215	1.90264	2.09975	2.02987	1.96231	1.80389	2.10244	1.94572	2.03	1.54198	2.38391	2.58115	2.07555	1.87132	2.04207	1.84592	2.22074	2.21	1.69474
YGR222W	0.20796	-0.49476	0.24667	0.14212	0.40463	0.46474	0.22298	0.16755	0.29688	0.15753	0.32147	0.09365	0.46781	0.29647	0.60464	0.45676	0.32009	0.24078	0.18986	0.29327	0.34765	-0.06633	-0.56777	0.06929	-0.56813	-0.48201	0.50124	0.46561	0.33674	0.01735	0.38275	-0.64299	-0.67365	-1.81888	0.05161	-0.01598	-0.09357	-0.28582	-0.17275	0.62361	-0.3274	-0.525	-0.01228	-0.5967	0.49588	-0.00242	0.0794	0.05534	0.3216
YAL068W-A	-3.11992	-4.12923	-3.03375	-3.40297	-3.89874	-3.54917	-5.10652	-3.67192	-4.68095	-4.9945	-4.82874	-4.68747	-4.55515	-4.85054	-5.05984	-5.00494	-4.42908	-5.16054	-4.27055	-3.92764	-4.34816	-3.84811	-3.15156	-2.99398	-4.05157	-3.64171	-3.43473	-3.17743	-2.71096	-2.98954	-3.81332	-4.06765	-4.36128	-4.67623	-4.23759	-4.02498	-4.00271	-4.18459	-3.18876	-3.06886	-3.93447	-3.83483	-4.24582	-4.05461	-2.93221	-3.27126	-4.39571	-4.01568	-3.42068
YML020W	-1.00501	-0.85117	-0.98324	-1.03719	-1.10351	-0.8713	-1.01872	-0.84468	-1.03898	-1.06173	-1.09277	-1.03629	-1.01981	-0.98924	-1.12285	-0.75966	-1.18761	-1.14144	-0.76625	-0.73214	-0.68544	-0.77184	-1.01231	-0.80075	-1.23317	-1.29549	-0.84629	-1.02896	-1.08456	-0.99507	-1.15197	-0.73661	-0.67607	-0.34573	-0.91582	-0.81767	-0.843	-0.54838	-0.86874	-0.71401	-1.10719	-0.91304	-1.01185	-1.03622	-0.85313	-0.9045	-0.89419	-0.68027	-0.68425
YGR121C	-1.41772	-1.04429	-1.37743	-1.09338	-1.66073	-1.96631	-0.91095	-1.22746	-0.91071	-1.11748	-0.96416	-0.79865	-1.34163	-1.49775	-1.64225	-0.86339	-1.33861	-1.27936	-1.13533	-1.23874	-2.28094	-2.32529	-0.42687	-2.18625	-1.47252	-1.70958	-1.78446	-1.14006	-1.34474	-1.08328	-1.13203	-0.73016	-0.52035	-0.49208	-0.69989	-1.626	-0.92285	-1.34767	-0.92802	-2.11078	-0.45114	0.4775	-1.19852	-0.53105	-1.57442	-1.7041	-2.19603	-1.91174	-2.15437
YDL095W	3.03685	3.01376	2.70212	2.99617	3.11901	3.1199	3.54696	3.53266	3.61027	3.37248	3.50775	3.35364	4.09948	3.95978	3.77151	3.98827	4.11077	4.14025	3.39819	3.09051	3.52102	3.24737	3.67966	3.36955	3.65104	3.29471	3.70032	3.53582	3.18911	3.71815	3.39234	3.55652	3.39651	3.30396	3.77303	3.49246	3.49864	3.25668	3.68537	3.41474	3.2813	3.61027	3.48017	3.88292	3.21473	3.62272	3.58874	3.21753	3.54467
YBR222C	1.70881	1.58313	1.48907	1.59	1.78945	1.48852	1.84085	1.52278	1.6754	1.59427	1.92332	1.57697	2.03783	1.61889	1.44006	1.78109	1.77661	1.86429	2.19782	1.54692	2.09978	2.16696	2.25482	1.57377	2.25878	1.96308	2.27445	2.15625	1.72658	1.84676	1.93977	1.68708	1.93609	1.95386	2.23369	1.78937	2.1112	1.50833	2.10666	1.87441	1.49205	1.92999	2.07249	2.38351	1.74164	1.70262	2.29364	1.63877	1.85903
YDL003W	-1.36743	-0.99395	-1.0082	-1.14094	-1.42947	-1.21659	-1.20945	-1.38259	-1.34239	-1.44747	-1.20112	-1.16586	-0.66736	-0.84375	-0.82974	-0.82507	-1.17373	-0.86132	-1.45744	-0.84037	-1.33782	-1.21853	-1.5232	-0.40402	-1.76629	-1.48914	-1.26242	-1.50741	-0.7927	-0.82648	-1.27487	-0.6707	-1.37917	-0.77574	-1.30016	-0.90327	-1.66152	-1.15471	-1.21011	-0.40466	-1.3666	-1.94968	-1.38882	-1.07734	-1.49761	-1.11116	-1.62682	-1.9535	-1.35375
YOR323C	1.95496	2.03443	2.02609	1.93727	2.24288	2.15757	1.85311	1.92473	1.70097	1.8853	1.86125	1.93107	2.05652	2.09294	2.15255	1.91361	2.21102	1.94324	2.14443	2.16901	2.14018	1.71125	1.55514	2.1786	1.71687	1.72067	1.83881	1.70478	2.12345	1.68687	1.73566	2.12231	1.97878	1.80392	2.07419	2.08381	1.99927	2.02755	1.81651	2.0848	2.07966	1.94175	2.05075	2.03878	2.00909	1.94173	2.32812	1.96247	2.21722
YMR183C	1.31487	1.35313	1.48131	1.20264	1.20838	1.24333	1.13015	1.12811	1.23232	1.41054	1.29772	1.23196	1.86244	1.33027	1.65068	1.15021	1.50657	1.44939	1.35901	1.88145	1.83227	1.47803	1.29136	1.65717	1.48106	1.48479	1.25129	1.30531	1.89013	1.34875	1.41325	1.42645	2.0296	1.50186	1.20367	1.54292	1.37575	1.79761	1.23285	1.63356	1.39622	1.14851	1.33563	1.44839	1.70396	1.57951	1.55433	1.24742	1.39461
YOR274W	-1.95723	-1.41261	-1.48103	-1.72952	-1.74559	-1.82066	-2.1951	-2.05626	-2.02422	-1.99957	-2.20917	-1.94459	-2.24783	-2.24122	-2.17955	-2.04539	-2.53247	-2.4395	-1.8908	-1.24255	-1.80191	-1.91039	-2.1704	-1.6024	-2.08219	-1.84851	-2.15241	-1.72898	-1.47788	-1.56083	-2.43829	-1.73129	-1.85662	-1.40068	-1.65735	-1.79614	-1.82205	-1.5922	-1.77357	-1.48148	-1.9722	-2.21014	-2.01356	-1.78082	-1.88556	-1.68633	-2.2507	-1.96173	-1.98544
YER146W	2.6476	2.69625	2.43223	2.50983	2.50445	2.03637	2.13402	2.46591	2.80711	2.50578	2.5918	2.61644	2.53423	2.34787	2.32525	1.8457	2.11278	2.713	2.2479	2.15013	2.43714	2.37536	2.01537	2.17841	2.26926	3.16086	1.6051	2.68239	2.22115	2.56591	2.46281	2.7915	2.49587	3.44436	1.98574	2.31711	2.45267	2.97989	2.48037	1.91624	2.2311	2.08466	2.83071	2.82032	2.18104	2.39265	2.76479	1.89173	2.17078
YML075C	0.6033	0.78863	0.5574	0.87271	0.74209	0.6595	2.30325	2.16626	2.46987	2.09514	2.36654	2.26039	2.08466	1.99703	1.80959	2.12906	2.11406	1.9511	0.70537	0.3015	1.47997	1.96361	1.42611	0.53356	1.18771	0.93183	2.39854	2.43457	2.51721	2.45693	0.96221	0.69224	0.73352	0.61644	0.76417	0.62703	0.91191	0.71332	1.34114	0.44256	0.85143	1.42698	2.71164	2.40154	1.79705	2.3744	0.85346	0.59629	1.34224
YOL035C	-4.17845	-3.79746	-4.1527	-3.86159	-4.33365	-4.29856	-4.16186	-4.20123	-4.45244	-4.8223	-4.44427	-4.88971	-3.98184	-4.01499	-4.06672	-4.26051	-4.19119	-4.30716	-4.20143	-3.84658	-3.7329	-3.79132	-3.93719	-3.615	-3.92597	-3.43134	-3.51	-3.25236	-3.7189	-3.75553	-4.19764	-4.04419	-4.18371	-3.92338	-4.07966	-3.61721	-3.7819	-3.84164	-4.02438	-4.02001	-3.8561	-4.30707	-3.84188	-3.87901	-3.99369	-3.86688	-3.79342	-3.74062	-3.89081
YPL063W	2.07887	1.795	1.76885	1.65525	2.02835	1.9283	1.97255	1.88052	2.11407	2.02052	2.11336	1.94907	2.46176	2.36011	2.40107	2.19453	2.40439	2.31856	2.19819	2.13348	2.23614	1.9032	1.84635	2.36059	1.86876	1.77741	1.47427	1.37467	2.10563	2.02004	1.04526	1.90475	1.85628	2.03833	1.74088	2.19569	2.04188	2.00235	1.75211	2.28669	2.07695	2.02078	1.60913	1.91253	2.08013	2.09086	2.16011	2.01914	2.16506
YDR457W	1.09872	0.90915	1.03526	1.04615	1.10787	1.22145	0.84337	0.82164	0.76432	0.7716	0.64166	0.75765	0.6706	0.99624	0.95811	0.78716	1.0965	0.8458	0.75328	0.9767	1.26144	1.21173	0.38991	0.71987	1.16916	0.83962	0.87929	0.68762	0.99422	0.87486	0.50219	0.31617	0.44846	0.30815	0.65874	0.814	1.11475	1.1201	0.71568	0.84786	1.29697	1.3391	0.94045	0.84277	1.03255	1.09598	1.17661	1.32229	0.99936
YLR273C	-1.50617	-1.50928	-1.28862	-1.33285	-1.20111	-1.27385	-0.77502	-0.65865	-1.17096	-0.78863	-0.80953	-0.89435	-1.193	-1.06532	-1.1565	-0.63275	-1.08702	-0.84345	-0.85606	-0.93337	-0.46647	-0.4588	-0.74466	-0.51744	-0.93495	-1.21786	-1.01668	-0.88739	-1.35001	-0.97611	-0.58288	-0.34153	-0.99918	-1.48222	-1.57391	-0.8232	-1.02653	-1.10207	-0.67125	-0.46581	-0.88526	-0.7447	-1.30517	-0.94183	-1.09794	-0.71618	-1.37168	-0.87526	-0.86315
YDR181C	-0.8389	-1.10606	-1.10011	-1.13261	-0.94123	-1.1199	-1.16182	-1.09783	-1.06079	-0.9019	-0.86157	-1.13539	-1.03817	-1.40704	-1.30644	-1.29018	-1.33546	-1.37516	-1.51835	-0.98287	-1.00097	-1.38494	-1.7103	-0.80805	-1.1246	-1.11652	-1.18175	-1.06414	-1.05111	-1.02456	-0.8538	-1.11142	-0.95402	-1.4312	-1.19842	-1.03898	-1.67305	-0.80615	-1.48687	-0.4922	-0.83909	-1.69431	-1.12979	-1.47027	-0.97157	-0.9889	-1.22254	-1.66291	-1.03416
YGL097W	0.3156	0.36872	0.26	0.25001	0.44912	0.05088	0.47192	0.33025	0.41717	0.29378	0.41948	0.48763	0.53161	0.5573	0.78505	0.79655	0.68936	0.68267	0.20066	-0.08569	0.15522	0.45684	0.56168	0.70767	0.2783	0.47575	0.34711	0.15364	0.13367	0.27084	0.29787	0.49306	0.53205	1.14832	0.23308	0.25045	0.54066	0.46627	0.67674	0.45216	0.25414	0.33496	0.24517	0.4686	0.29719	0.47455	1.14594	-0.05478	0.54234
YCL056C	-0.74076	-0.84443	-0.58817	-0.84108	-0.47324	-0.6956	-0.83967	-0.52274	-0.7775	-0.7573	-0.66588	-0.67778	-1.08747	-0.84324	-0.61433	-1.12126	-0.65415	-1.02323	-1.0144	-0.74562	-0.68278	-0.97601	-1.03008	-0.59256	-0.71832	-0.64821	-0.43799	-0.50029	-0.83929	-1.21763	-0.60634	-1.28003	-1.25799	-2.0701	-1.16247	-1.10651	-0.80692	-0.82881	-1.38009	-0.71924	-0.77043	-1.39698	-0.73468	-1.31452	-0.73037	-0.60579	-0.45439	-0.65254	-0.345
YJL083W	0.31837	0.46247	0.1568	0.09137	0.01664	0.17752	0.44787	0.54736	0.32004	0.45416	0.57997	0.56795	0.13701	-0.0528	-0.13673	0.16822	-0.18551	-0.21621	0.89466	0.36529	0.95327	1.06995	0.89527	-0.20396	0.66863	0.75429	0.9591	0.94692	1.0921	0.65082	0.9346	1.00233	0.95621	0.78931	0.97341	0.368	0.8283	0.60614	0.87844	0.34577	0.75494	1.48345	0.99109	0.76307	0.41905	0.40701	0.94544	1.14316	0.61065
YMR242W-A	-3.94682	-4.44913	-4.36218	-4.64712	-4.3557	-4.68049	-4.67292	-4.52791	-4.48777	-4.45557	-4.51633	-4.98751	-4.06274	-3.8825	-5.05729	-4.2089	-4.36979	-4.0021	-3.93621	-3.83275	-3.39332	-4.35301	-3.59153	-3.52889	-4.08079	-4.09609	-3.68074	-3.81548	-3.893	-2.02574	-3.81843	-3.81174	-3.66623	-4.60839	-3.64635	-3.56579	-3.61151	-3.8281	-3.69952	-4.01744	-3.28322	-2.10498	-4.04502	-3.87491	-3.94483	-4.00304	-4.496	-4.31111	-3.34221
YOR026W	-1.34628	-1.23387	-1.18165	-1.13116	-1.16029	-1.07147	-0.73173	-0.77733	-0.94012	-0.68462	-0.80859	-0.77041	-0.56677	-0.45499	-0.5075	-0.28346	-0.24591	-0.30842	-0.99348	-1.03443	-0.81265	-0.67136	-0.95425	-0.85912	-1.12168	-0.89397	-1.19439	-1.21826	-1.01517	-0.7119	-1.06847	-1.01998	-0.68323	-0.36187	-0.79646	-0.78835	-0.8107	-0.84445	-0.75244	-0.76717	-1.04521	-0.86485	-1.20189	-0.68165	-0.83444	-0.71904	-0.9908	-1.10568	-0.99498
YPL140C	-0.66391	-0.63156	-0.55944	-0.64078	-0.53431	-0.44936	-0.27928	-0.01357	-0.2122	-0.2507	-0.11958	-0.12637	-0.70445	-0.32267	-0.34338	-0.43825	-0.54416	-0.62398	-0.55291	-0.68896	-0.27257	-0.40618	-0.46477	-0.2419	-0.54085	-0.5568	-0.57819	-0.83476	-0.92648	-0.00017	-0.23159	0.01697	0.04195	-0.78761	-1.06759	-0.7177	-0.29714	-0.17949	-0.42937	0.09454	-0.57149	-0.70111	-0.46575	-0.68059	-0.24851	0.18667	-0.23661	-0.37898	-0.2576
YNR016C	2.30797	2.36127	2.39196	2.5195	2.42764	2.40003	3.09102	3.08238	3.05742	3.12537	3.05519	3.08889	3.3823	3.66077	3.51921	3.58979	3.74919	3.4618	2.44775	2.4322	2.75264	2.81534	3.03094	2.85417	2.73269	2.25272	2.93128	2.90055	2.69463	2.65569	2.5339	2.1061	2.71585	2.37329	2.4841	2.31695	2.55197	2.25321	2.86071	2.75353	2.98002	3.01168	3.24345	3.31571	2.6179	2.61821	2.72546	2.51596	2.77533
YER123W	0.77243	0.59291	0.65016	0.60082	0.94051	1.11099	0.70863	0.85477	0.77397	0.78609	0.68357	0.68833	1.17485	1.04783	1.00465	0.87955	1.10658	0.95814	0.95507	1.05339	1.00266	0.95649	0.82841	1.34007	0.40517	0.48382	0.68699	0.47591	0.82351	0.60263	0.42246	0.65178	1.10397	0.62045	0.88241	0.94623	1.15304	1.03014	0.89455	1.18419	0.63439	0.75867	0.53371	0.44686	0.80634	0.8139	0.73202	0.90464	0.9798
YKR054C	-1.06895	-0.8704	-1.12765	-0.98939	-0.79885	-0.91491	-1.15595	-0.93752	-1.06262	-1.08349	-1.19711	-1.02083	-1.20637	-0.89961	-1.04496	-0.86215	-0.82476	-1.00116	-1.2435	-1.03956	-0.86649	-0.62862	-1.11838	-0.99059	-1.00188	-1.22597	-1.25334	-1.28496	-1.10617	-1.16634	-1.53028	-1.08528	-1.12578	-0.93008	-1.26256	-1.19722	-0.98591	-0.96976	-0.91172	-1.13197	-0.85301	-0.59456	-1.2821	-0.9651	-1.28251	-1.22873	-1.39843	-1.0461	-1.24178
YGR055W	1.4655	1.41107	1.11836	1.49748	1.74966	1.1989	2.31323	2.04685	2.19374	2.02017	2.4238	1.86466	2.07379	1.82133	1.48414	1.8243	2.07826	1.82463	2.47807	1.87655	2.20223	2.09625	2.63818	2.75152	2.00061	1.28706	2.02864	2.71172	1.3418	2.82258	2.31326	2.02659	1.38131	1.40657	1.97665	2.00644	1.87295	1.10327	2.59248	2.98318	1.76681	2.13265	2.11505	2.42551	2.05743	3.36232	2.60101	1.32108	1.47276
YMR315W	2.778	2.82259	2.75297	2.82612	2.78792	2.91912	3.17846	3.43569	3.1301	3.35344	3.34553	3.43738	2.77677	3.30317	3.13436	3.2217	3.13249	3.09362	3.16916	3.17278	3.48346	3.44556	3.15717	2.83124	3.32868	3.03013	3.51972	3.18284	2.68302	3.11388	3.34334	3.61911	2.87746	2.93281	3.232	2.99327	3.39965	3.12109	2.97938	2.92014	3.26857	3.10936	2.86311	3.0976	3.15428	3.21975	3.73879	3.48139	3.43701
YAL024C	-0.73537	-0.5763	-0.73636	-0.94169	-0.64052	-0.59411	-1.09517	-1.03881	-1.02269	-1.07613	-1.13228	-0.93599	-0.80799	-0.85342	-0.75771	-0.91961	-0.92976	-0.90994	-1.17991	-1.18214	-0.70326	-0.67993	-1.06128	-0.73135	-0.81977	-0.9104	-1.07715	-1.2131	-1.2413	-0.80999	-1.42989	-0.88002	-0.76611	-0.8801	-1.21841	-0.96442	-0.78687	-0.57934	-0.73331	-0.72165	-0.9962	-0.81403	-0.97768	-0.74444	-0.86775	-0.77136	-1.05345	-1.02888	-0.98199
YKL202W	-4.30963	-3.44933	-4.8047	-4.54582	-4.39907	-4.58673	-4.87893	-4.61577	-4.41612	-3.35823	-4.66396	-4.98751	-4.313	-3.99398	-4.41275	-4.35559	-4.22991	-4.83076	-3.14523	-3.6264	-3.8209	-4.21065	-3.72438	-3.47875	-3.71351	-4.04809	-3.94309	-3.46559	-3.11822	-3.20628	-3.76477	-4.80631	-3.85532	-2.97034	-3.90552	-3.9654	-3.49082	-4.05218	-3.6751	-3.70063	-3.8561	-4.37217	-3.65697	-4.11293	-3.73563	-3.70976	-3.67001	-3.81563	-3.61538
YKL187C	-1.14453	-0.71253	-0.81924	-0.91386	-0.94347	-0.97439	0.00323	0.11268	-0.71892	0.21313	-0.41946	0.08376	-1.58461	-1.24315	-1.37834	-0.84085	-1.28455	-1.3639	-0.02731	-0.69127	1.18346	1.5371	0.53315	-1.49947	0.41245	0.46294	0.843	0.53344	-1.24688	-0.59791	0.14414	-0.48808	0.07054	-0.34905	-1.26948	-1.45923	-1.04426	-1.52497	0.20193	-1.28653	0.84105	0.91766	0.49454	0.96367	0.01287	-0.70117	-0.49073	0.72132	-0.57465
YDR383C	-1.10602	-1.08075	-0.74433	-0.79366	-0.66848	-1.07026	-1.28357	-1.36807	-1.05462	-0.88404	-1.21939	-1.70793	-1.44168	-1.80925	-1.61766	-1.74956	-1.93589	-2.12503	-1.6437	-0.81042	-1.14346	-1.19719	-1.84465	-1.16701	-0.91934	-0.94826	-0.66969	-0.51019	-0.46292	-0.87265	-0.63709	-1.23035	-1.16575	-0.66661	-1.71878	-1.41256	-1.65286	-0.75965	-1.84147	-1.33068	-0.66133	-1.72959	-0.51322	-1.47294	-0.67481	-0.84292	-1.21197	-1.26779	-0.85289
YDR396W	-4.44024	-4.82505	-4.50596	-4.87315	-4.57465	-4.34527	-4.62383	-4.59698	-4.64568	-4.01689	-4.45835	-4.72592	-4.46901	-4.74272	-4.26604	-4.50899	-4.49753	-4.43552	-3.87607	-3.73846	-4.15367	-4.09225	-3.69756	-3.65545	-4.06123	-3.77721	-4.06596	-3.99818	-3.80055	-3.88606	-3.54836	-4.36053	-4.00154	-3.6907	-3.5391	-3.94009	-3.96585	-3.66903	-3.88599	-3.68662	-3.7589	-3.93089	-3.74263	-3.53947	-3.54617	-4.02635	-3.46972	-4.11512	-3.80704
YKL055C	-0.52495	-0.54369	-0.97977	-0.73263	-0.66325	-0.82594	-1.4802	-1.32775	-1.39861	-1.42939	-1.50745	-1.46392	-1.3907	-1.51607	-1.56116	-1.13817	-1.39203	-1.45558	-0.74342	-1.56481	-1.18576	-1.03769	-0.27565	-0.80002	-0.70695	-0.97885	-0.67727	-0.75499	-0.71706	-0.45799	-0.99854	-0.59125	-0.54685	-0.7289	-1.40434	-1.4436	-0.66207	-1.05974	-0.64622	-1.06935	-0.50843	-0.38234	-0.55274	-0.3377	-1.10567	-1.13092	-1.14943	-0.75453	-0.66785
YGR115C	-4.5009	-4.69919	-4.79915	-4.44304	-4.37042	-4.34044	-4.42783	-4.86026	-4.32168	-4.91209	-4.67042	-4.9163	-4.98611	-4.25538	-4.26248	-5.21931	-4.56359	-4.85759	-4.29978	-4.06231	-4.0588	-4.23558	-4.11519	-4.0166	-4.43352	-3.89582	-4.03857	-3.99719	-4.22628	-4.09314	-4.35899	-4.18841	-4.12255	-3.23257	-3.77001	-3.68506	-3.8966	-4.19964	-4.2639	-4.34369	-4.01474	-4.13737	-4.17908	-4.35751	-4.22596	-3.98394	-3.98435	-4.03258	-4.2756
YDR035W	1.75925	1.82526	1.74241	2.06502	2.0669	1.82314	1.9611	1.94892	2.15313	2.24932	2.08255	1.90875	1.88716	2.02077	1.90558	1.543	2.0358	1.85887	1.86479	1.81561	1.82392	1.82127	1.69651	1.40654	1.6265	1.57312	1.8223	1.64181	1.68962	1.59986	2.47474	1.81787	1.4681	1.20837	2.26938	2.19934	1.8774	1.7558	1.73831	2.12144	2.17866	2.23647	1.67583	1.10922	2.23171	1.54507	1.6994	2.42141	2.16596
YBL062W	-4.36351	-4.35333	-4.77787	-4.18728	-4.60597	-4.58673	-4.44952	-5.25382	-4.78846	-4.94854	-5.10597	-4.85672	-3.75821	-3.82797	-4.21928	-4.79037	-3.48989	-3.83713	-3.95271	-4.47973	-3.93811	-4.15012	-4.45687	-3.75375	-4.19948	-4.77847	-4.39416	-4.08012	-3.79732	-4.47769	-4.00578	-4.32492	-3.75262	-3.24292	-3.45514	-3.53503	-4.00309	-4.18495	-4.75985	-4.10326	-4.05752	-3.66023	-3.985	-2.56564	-4.07012	-3.23173	-4.14042	-4.19287	-3.93148
YHR160C	-4.17594	-3.98607	-4.04298	-4.18728	-4.4455	-4.04003	-4.02166	-4.18782	-4.21825	-3.65418	-3.89253	-4.72057	-4.0337	-3.81102	-4.15538	-3.73641	-4.27928	-4.37855	-3.51456	-3.15235	-2.94975	-3.19112	-3.452	-3.46645	-3.56829	-3.50027	-3.15961	-2.78937	-3.20344	-3.47902	-3.35177	-4.09151	-3.66623	-3.33431	-3.97543	-3.51893	-3.23219	-3.30187	-3.41769	-3.16453	-3.35029	-3.12503	-3.55904	-3.99673	-3.44216	-3.62676	-3.31373	-2.83619	-3.60492
YGR047C	-1.00322	-0.91794	-1.00266	-0.95074	-0.91156	-1.05774	-0.86498	-0.84475	-0.87299	-0.89118	-0.82309	-0.77389	-1.03024	-0.8757	-0.83791	-1.03924	-0.96031	-0.9173	-1.32329	-1.18595	-1.1066	-1.12302	-1.35767	-0.95969	-1.35302	-1.15182	-1.27505	-1.31898	-1.06109	-1.02701	-1.2916	-1.01254	-1.06145	-1.04697	-1.13116	-0.88365	-1.25511	-0.92593	-1.18706	-0.88111	-0.87885	-1.03259	-0.97477	-0.99571	-0.86234	-0.7101	-1.01398	-1.20517	-0.99124
YDR119W	0.25317	0.26952	0.03815	0.43431	0.18052	0.23564	0.68995	0.55001	0.68543	0.51445	0.63038	0.30942	1.002	0.97937	0.92395	1.21177	1.22111	0.84249	0.25126	-0.00565	0.56446	0.54576	0.83205	0.43476	0.75921	0.13377	0.5899	0.68323	-0.32222	0.16945	0.52797	-0.28684	0.20275	-0.25249	0.25191	0.36024	0.8337	0.38922	0.74382	0.02632	1.02724	1.10357	0.41354	0.13187	0.3009	0.18022	0.69949	0.56702	0.40852
YBR208C	-1.23729	-1.08793	-1.30155	-1.03256	-1.13591	-1.27385	-1.00219	-1.18399	-1.31099	-0.71035	-0.91591	-0.52343	-1.01952	-0.91794	-1.00529	-0.50445	-0.79616	-0.79195	-1.15596	-1.29088	-1.59695	-1.35468	-0.85161	-1.11686	-1.15091	-1.11258	-1.69906	-1.66909	-0.28582	-0.97293	-0.93622	-0.77332	-1.28932	-0.858	-1.45848	-1.4027	0.00245	-0.64373	-0.73234	-1.33068	0.08252	0.82106	-1.3016	-0.70452	-0.75997	-0.91688	-0.60418	-0.29115	-1.39285
YER151C	1.1378	0.95254	1.18942	0.68657	0.98381	1.1275	0.33829	0.68774	0.73348	0.5255	0.57239	0.47855	0.60637	0.47753	0.63231	0.33123	0.41341	0.51068	0.70218	1.19361	0.98006	0.78373	0.38905	1.30847	0.42648	0.51315	0.47528	0.17136	1.04125	0.94714	0.11715	0.55632	0.9748	0.93691	0.81967	1.18101	0.86834	1.28617	0.69555	1.25767	0.77778	0.68643	0.79147	0.78138	1.06606	1.07263	1.26834	0.85791	1.1514
YLR070C	-2.51215	-2.25213	-2.58012	-2.4849	-2.30669	-2.37015	-2.7108	-2.27704	-2.88583	-2.34626	-2.65224	-2.20432	-2.79297	-2.80581	-2.58496	-2.7534	-2.94755	-3.10332	-2.37944	-2.71574	-2.12656	-2.22217	-2.26154	-2.55706	-2.57929	-2.19141	-2.21525	-2.19982	-2.39002	-2.22794	-2.05371	-2.0227	-2.09677	-2.13255	-2.35966	-2.45426	-2.31856	-2.19999	-2.12397	-2.14347	-2.35862	-2.22471	-2.45958	-2.67995	-2.54282	-2.4004	-2.49109	-1.61455	-1.83195
YPR019W	0.29276	0.46112	0.4439	0.56245	0.24208	0.39085	0.80107	0.63812	0.6496	0.75289	0.58969	0.67679	0.70145	0.71528	0.91116	0.96181	0.90202	0.84265	0.53554	0.61429	0.25325	0.41894	0.54625	0.40471	0.69637	0.52781	0.49875	0.74702	0.55679	0.64745	0.28898	0.42001	0.4495	0.47517	0.84851	0.78908	0.4717	0.21997	0.67116	0.25509	0.57771	0.86659	0.70752	0.87167	0.8076	0.73446	0.64044	0.78879	0.43673
YPL228W	0.43293	0.43871	0.52425	0.34434	0.43001	0.47062	0.2963	0.33552	0.50032	0.37911	0.47078	0.18134	0.2906	0.05824	0.24067	-0.06965	0.12728	0.11934	-0.04696	0.44139	0.38948	0.36084	-0.04972	0.47843	0.14452	0.06537	0.24038	-0.11641	0.25358	1.11141	0.18558	0.45298	0.53606	0.7279	0.36229	0.56585	0.01489	0.6397	0.02206	0.52637	0.54286	-0.04815	0.37991	0.12877	0.755	1.4571	0.47956	0.248	0.45122
YPR190C	-1.6846	-1.43789	-1.44704	-1.3971	-1.35714	-1.38881	-0.96906	-1.18728	-0.98271	-1.17692	-0.82667	-0.59613	-0.81321	-0.84022	-0.66239	-0.54459	-0.80532	-0.67847	-1.30418	-1.2284	-1.31878	-1.4289	-1.52901	-0.65259	-1.43446	-1.56575	-1.37956	-1.93624	-1.6698	-0.95123	-1.33063	-0.62337	-1.2717	-0.78359	-0.96465	-0.95058	-1.21883	-1.26597	-1.05556	-0.6433	-1.03929	-0.86646	-1.16163	-1.44225	-1.46578	-1.23712	-0.90037	-1.64702	-1.23046
YGR041W	0.63277	1.07472	0.82921	0.61598	0.74042	0.8257	-0.23736	-0.59453	-0.43085	-0.36751	-0.30621	-0.51401	0.46482	0.40046	0.30158	0.401	0.61297	0.37194	0.62081	0.17152	-1.01637	-0.764	0.95572	0.60659	-0.77467	-0.71562	-0.42427	-0.47335	0.35624	0.92019	1.00198	0.19581	1.22315	0.48524	0.69111	0.63006	-0.63712	-0.64299	-0.6212	-0.99749	1.00995	1.32586	1.29271	1.29134	0.00549	0.91288	0.97631	0.44981	1.13801
YHR097C	1.01914	0.88234	1.13711	0.53195	0.85088	1.12283	1.9317	1.94995	1.66869	2.2605	1.91004	1.87516	1.03459	0.97023	1.22032	0.88407	1.00515	0.8788	1.78707	2.54494	2.84544	2.69215	1.82813	1.92349	1.72517	2.37404	2.16295	1.93803	1.72288	1.2705	1.64558	1.58319	1.79373	1.24454	0.87433	1.43682	2.13257	2.80595	2.03275	2.1375	1.62636	1.43671	1.20593	0.72853	2.60995	1.75753	1.73919	2.47886	2.09805
YDR353W	3.75923	3.77834	3.85407	3.64661	3.95227	3.82438	4.18673	4.08592	3.98931	4.26992	4.28467	4.36241	5.16127	5.32535	5.18996	4.87534	5.15153	5.29346	3.97298	3.77114	3.90217	4.26155	3.98319	3.88762	3.55418	3.985	3.84277	3.5616	3.53976	3.62585	4.03536	4.0316	4.12738	4.01604	3.9298	3.77113	3.87829	3.76138	3.7834	3.67596	3.97213	4.414	3.64524	3.67474	3.77179	3.46595	4.46267	6.47636	3.81032
YPL047W	0.27148	-0.16066	0.06379	0.39161	-0.36212	-0.02447	0.06666	0.03477	0.02787	-0.09476	0.1251	0.20443	0.01554	-0.20243	0.08219	0.4318	-0.10022	0.11276	0.41869	0.24911	-0.02245	0.07891	0.44225	-0.15582	0.3878	0.34148	0.18165	0.12363	-0.09084	0.2579	0.50161	0.10513	0.33072	0.71814	0.5125	0.34014	0.35299	-0.0782	0.37527	0.07608	0.05026	0.6619	0.11595	0.00633	-0.22636	-0.13544	-0.02544	-0.34864	-0.21549
YPL014W	1.81277	1.97404	1.82446	2.14904	1.42723	1.52247	3.64028	3.60418	3.32635	3.6269	3.63916	3.58442	2.90174	2.71076	2.88151	2.9868	2.85886	2.98448	1.71629	1.56603	2.73843	2.92227	2.80799	1.05797	3.62028	3.73767	3.02951	3.06681	2.41804	2.1981	3.48785	3.1463	2.19491	2.43184	1.73613	1.25155	3.26188	3.03901	2.69197	0.78304	3.65093	3.87789	3.6136	3.20743	3.08358	2.01751	3.13286	3.80529	2.31505
YGR007W	1.27543	1.22145	1.15548	1.26847	1.27311	1.10479	0.85083	0.62493	0.80706	0.87942	0.8419	0.66618	0.69268	0.67771	0.906	0.95441	1.12725	0.98801	0.94232	1.17303	1.04169	0.89875	0.57252	0.97103	0.98526	0.99351	0.62641	0.52592	0.89634	0.76181	0.38644	1.05941	1.08659	1.24268	1.15499	1.07965	1.02774	1.09244	0.97941	1.46384	0.76593	0.89503	0.58794	0.76864	1.02816	0.79997	1.4287	0.58439	0.80556
YML116W	-0.33494	-0.39571	-0.69235	-0.46316	-0.05351	-0.33786	-0.80435	-0.80652	-0.70448	-0.87078	-0.89578	-0.63156	-1.05514	-0.99697	-1.35303	-0.64296	-1.19614	-1.04514	-0.39333	-0.80197	-0.92192	-0.88771	-0.42523	-0.56897	-0.27686	-0.57835	-0.6461	-0.5991	-0.66145	-0.53683	0.42715	0.18776	-0.4661	-0.3606	-0.25509	-0.3392	-0.60561	-0.91237	-0.38827	-0.66226	-0.63972	-0.19481	-0.41267	-0.46195	-1.0113	-0.81265	-0.93743	-0.59849	-1.01646
YOL137W	-0.04487	0.05269	-0.21396	-0.10115	-0.40068	-0.11691	-0.39982	-0.33828	-0.29864	-0.33036	-0.40399	-0.33333	0.31067	0.41071	0.07641	0.18441	0.36441	0.10762	-0.21785	-0.54331	-0.76998	-0.53915	-0.23316	-0.66786	-0.00721	-0.64923	-0.34513	-0.1405	-0.73171	-0.67398	-0.45033	-0.59125	-0.54476	0.12194	-0.31734	-0.38402	0.14285	-0.36513	-0.35741	-0.90282	0.08072	0.16442	-0.10061	0.14592	-0.20259	-0.82212	0.0203	0.11449	-0.54443
YGL155W	0.40541	0.57716	0.28729	0.45039	0.41741	0.38714	0.34041	0.33407	0.25808	0.35267	0.32466	0.39028	0.40156	0.30147	0.35771	0.24534	0.34013	0.35029	0.40843	0.28659	0.20056	0.1707	0.26048	0.26933	0.29184	0.23827	0.06073	0.24734	0.11983	0.40878	0.25041	0.35848	0.8585	0.14284	0.33223	0.34712	0.34426	0.39962	0.50748	0.48409	0.35337	0.3716	0.33749	0.68591	0.20548	0.26344	0.29572	0.25755	0.02093
YER061C	-0.63511	-0.77922	-0.51895	-0.58774	-0.59244	-0.42409	-0.83841	-0.49842	-0.88328	-0.65256	-0.80036	-0.61842	-1.22194	-0.95816	-0.88654	-0.79774	-0.96222	-0.96018	-0.48807	-0.55399	0.00783	-0.49046	-0.8452	-0.73834	-0.76987	-0.72194	-0.49928	-0.33643	-0.67091	-1.10333	-0.62292	-0.40106	-0.79534	-0.84515	-0.48808	-0.75739	-0.62068	-0.98745	-0.87316	-0.33805	-1.01954	-0.97335	-1.08899	-0.80444	-0.53817	-0.94185	-0.38344	-0.43492	-0.50755
YKL214C	0.69554	0.6411	0.59374	0.60307	0.66757	0.58911	0.45158	0.44914	0.64173	0.49532	0.68979	0.34505	0.60707	0.68744	0.77797	0.14805	0.39819	0.34603	0.34978	0.58122	0.59101	0.35722	0.27252	0.59013	0.25837	0.24595	0.10612	0.30924	0.52741	0.27258	0.29559	0.89193	0.7804	0.82523	0.45469	0.61518	0.39943	0.4943	0.09171	0.51404	0.43791	0.03745	0.27656	0.26111	0.84894	0.451	0.43008	0.3616	0.66675
YPL119C	-0.28963	-0.13601	-0.4875	-0.29147	-0.14766	-0.30126	-0.31496	-0.21005	-0.53374	-0.23548	-0.33044	-0.2733	-3.27245	-3.01149	-3.27808	-2.62388	-3.22582	-3.14753	-0.1985	-0.54732	0.00391	0.05558	-0.46985	-1.37484	-0.10497	-0.0741	0.17421	-0.06856	-0.81298	0.29553	-0.18612	0.44138	-0.18802	0.11329	-0.46264	-0.60934	0.14939	-0.34296	-0.11557	-0.77548	0.19951	0.21892	-0.039	0.10406	-0.60421	0.62592	-0.12936	0.27545	-0.47677
YDL125C	3.55752	3.6417	3.60159	3.59419	3.37213	3.30606	4.13696	3.71379	3.88809	3.78634	3.97928	3.79991	3.68757	3.55955	3.60402	3.90906	3.41122	3.92106	3.68015	3.3776	3.33926	3.81017	3.93049	3.18675	3.77758	3.93578	3.6544	4.17676	3.91077	3.94352	4.02476	4.12177	3.50842	4.22241	4.10554	3.73015	3.87313	3.40773	3.81591	3.37429	3.77195	4.06633	4.31763	4.69258	3.56404	3.81173	3.95442	3.97465	3.54186
YHR186C	-0.48349	-0.431	-0.49565	-0.4294	-0.19884	-0.27362	-0.28882	-0.12853	-0.35141	-0.27232	-0.43639	-0.16354	-0.22441	-0.03292	-0.00961	0.09592	-0.04917	-0.02361	-0.11651	-0.43906	-0.04566	-0.1147	-0.3419	-0.24227	-0.28445	-0.6669	-0.40816	-0.67919	-0.66493	-0.40735	-0.43004	-0.23493	-0.32731	-0.25377	-0.22295	-0.38222	0.11029	-0.30389	-0.36451	-0.27602	-0.23671	-0.09487	-0.45704	-0.06479	-0.50633	-0.30782	-0.2055	-0.61972	-0.33845
YKL011C	-1.74557	-1.80292	-1.58867	-1.6471	-1.56183	-1.58139	-1.86383	-1.96665	-2.09995	-2.0041	-2.11039	-1.97033	-2.07145	-2.25729	-2.317	-1.92506	-2.15402	-1.9824	-2.03298	-1.67726	-1.39311	-1.57288	-2.3122	-1.73952	-2.17452	-1.68353	-1.77901	-1.78987	-1.58807	-1.6282	-1.53941	-1.48181	-2.27071	-2.03972	-1.79481	-1.77287	-1.54446	-1.68164	-2.18938	-1.69057	-1.79164	-2.34016	-1.8607	-2.17028	-1.32291	-1.71998	-2.06515	-1.46856	-1.53953
YLL019C	1.9003	1.95845	1.71442	1.73041	1.71757	1.7028	2.17174	2.03571	2.04865	2.03082	1.9374	1.96442	2.01929	1.971	2.03811	1.97488	2.06796	2.23175	1.98675	1.82621	2.43168	2.47207	2.25144	1.95631	2.18735	2.40859	2.3484	1.98244	2.23185	1.81539	2.07097	1.98098	2.30576	1.86963	1.88512	1.96686	2.45226	2.32125	2.1951	1.82345	2.31079	2.49539	2.33714	2.02753	2.24052	1.91076	2.10932	2.31071	1.94921
YNL257C	-0.32127	-0.32624	-0.34397	-0.34286	-0.26069	-0.15662	-0.42571	-0.14197	-0.46498	-0.31377	-0.40115	-0.3728	-0.43379	-0.15562	-0.26916	-0.32443	-0.2501	-0.32626	-0.16677	-0.06236	-0.23443	-0.38703	-0.52388	-0.09927	-0.46276	-0.4211	-0.36803	-0.57897	-0.40949	-0.71865	-0.38506	-0.49508	-0.62705	-0.9069	-0.27231	-0.37234	-0.85416	-0.51896	-0.58911	-0.22412	-0.51002	-0.59892	-0.667	-0.77652	-0.51178	-0.47844	-0.32489	0.01612	-0.26343
YGL199C	-3.27718	-2.55083	-2.90032	-2.6595	-3.0215	-3.02002	-2.51251	-2.61349	-2.70376	-2.70019	-2.71658	-2.76495	-2.8005	-2.5227	-2.97929	-2.14021	-3.01203	-2.95478	-2.54766	-2.78388	-2.53085	-2.34289	-1.8837	-2.84085	-1.83864	-1.40139	-2.31026	-2.46206	-3.17937	-2.53855	-2.73025	-2.52553	-1.88134	-2.57897	-2.9599	-2.8902	-2.48344	-2.66675	-2.2664	-3.22071	-2.3631	-2.10498	-1.98213	-1.47815	-3.04708	-3.08084	-3.19329	-2.62559	-2.85736
YJR092W	-0.90043	-0.89699	-0.83194	-0.89476	-0.92837	-0.80929	-0.86173	-0.88681	-0.67869	-0.83334	-0.65707	-0.7531	-0.20223	-0.63075	-0.39377	-0.49802	-0.42554	-0.52966	-1.01019	-0.8819	-0.30722	-0.499	-0.75791	-0.09587	-0.38857	-0.85422	-0.60362	-0.98245	-0.47285	-0.39068	-1.29717	-0.88791	-0.77249	-0.88282	-1.18703	-0.80482	-0.55809	-0.5169	-0.20494	-0.15008	-0.63878	-0.42004	-0.72768	-0.34884	-0.76785	-0.57958	-0.78548	-1.21996	-0.65013
YDR010C	-3.99527	-2.72117	-3.59408	-3.28754	-3.26514	-3.51589	-3.90453	-3.99564	-4.64271	-4.23542	-4.03107	-5.44775	-4.08215	-4.96252	-4.82951	-3.68374	-4.57888	-4.2139	-3.18979	-3.20889	-4.18826	-3.82016	-3.46805	-3.40663	-2.91513	-2.75865	-3.42727	-3.88488	-3.15921	-3.1205	-3.73482	-2.96129	-3.23421	-1.34042	-2.89006	-2.95492	-3.4655	-3.53838	-3.75345	-3.95234	-3.0809	-3.12503	-3.02369	-1.4623	-3.10044	-3.35671	-3.03827	-2.81316	-3.07928
YBR291C	-1.904	-1.43519	-1.58239	-1.33665	-1.05676	-1.5446	-1.39388	-1.35365	-1.10527	-1.30376	-1.26797	-0.76448	-1.18596	-1.13187	-1.02683	-0.79842	-0.8733	-1.19424	-0.81644	-1.57396	-1.44841	-1.43039	-1.40943	-1.41932	-0.97827	-1.20544	-1.46711	-1.80534	-1.6691	-1.5211	-0.47393	-0.88354	-1.13288	-0.54397	-0.89129	-1.30152	-1.10034	-1.45519	-1.21012	-1.21158	-1.70303	-1.11012	-1.30787	-1.06044	-1.61308	-1.68926	-1.81942	-1.68852	-1.5766
YBL059W	-0.81867	-0.987	-1.00193	-0.82979	-1.20241	-0.97051	-0.81392	-0.68613	-0.65155	-0.44834	-0.54813	-0.75159	-0.83023	-0.66919	-0.46216	-0.46238	-0.79803	-0.44463	-0.75719	-0.5666	-0.4915	-0.79091	-0.90801	-0.06135	-0.94201	-1.02756	-0.46409	-0.31906	-0.74119	-0.95887	-0.07053	0.01822	-0.44995	-0.13564	-0.76191	-0.55068	-0.96589	-0.30183	-1.04314	-0.35296	-0.36269	-1.42963	-0.70078	-0.79808	-0.59545	-0.55097	-0.49437	-0.61374	-0.51884
YPL189C-A	0.00916	0.24559	-0.51955	0.16125	-0.06815	-0.00694	1.65259	1.60627	1.6551	1.39801	1.45764	1.26736	0.95434	0.74093	0.99748	1.93526	1.33189	1.52632	0.03098	-0.40356	1.37665	1.68868	0.89263	-0.2811	0.84767	1.02637	1.76266	1.65005	0.70941	1.61525	1.37756	0.7467	0.2856	1.03387	0.75657	-0.10287	1.01859	0.4895	0.68991	-0.3869	1.3415	1.28809	0.95246	1.98342	0.98577	1.65811	0.47581	0.66539	1.22947
YPL275W	-3.89124	-3.83916	-3.79648	-3.69177	-3.67778	-3.77379	-3.41573	-3.47839	-3.49415	-3.26559	-3.32711	-2.89605	-4.29966	-4.11606	-4.24747	-4.41961	-4.0935	-4.24216	-3.19845	-2.91159	-3.00692	-3.44116	-2.70715	-3.26151	-3.31184	-3.29484	-2.98594	-2.94304	-2.00608	-3.03651	-3.27341	-3.11421	-3.54415	-2.77083	-3.26003	-3.11675	-2.91816	-2.58087	-2.79058	-3.19015	-3.37909	-3.83555	-1.88092	-1.15485	-3.62083	-2.97516	-3.50887	-3.5434	-1.4543
YDR262W	1.18565	1.33637	1.06213	1.23444	1.39132	0.97054	0.90362	0.89563	0.64317	0.69712	0.72524	0.70663	-0.2622	-0.12524	-0.13174	-0.01457	-0.2051	-0.1968	0.54948	0.19111	2.0141	1.98764	0.7495	0.05026	1.11993	1.1339	0.90291	0.68526	1.47204	0.16114	0.84377	0.78334	0.80477	0.72883	0.60225	0.40416	0.93593	0.64268	1.67915	1.4616	1.08467	1.00331	1.09296	0.4049	1.45588	0.55287	1.39641	1.69095	0.58547
YLR078C	-0.06736	-0.35833	-0.22641	0.2197	-0.21514	0.0823	-0.41218	-0.17379	-0.18465	-0.09198	-0.22504	-0.46008	-0.04075	-0.1026	-0.21185	-0.35191	0.28985	-0.07274	0.01038	0.4685	0.03309	-0.20173	-0.51894	-0.09657	-0.24982	-0.19517	-0.07313	-0.02473	-0.01444	-0.12051	0.1864	-0.69938	-0.26277	-0.83783	0.47277	-0.01977	-0.62376	0.02483	-0.46297	0.06225	-0.20196	-0.43499	-0.41117	-1.02946	-0.18579	0.01296	-0.28015	-0.2589	0.14138
YFL012W	-4.78783	-4.43901	-4.34158	-4.88108	-4.61937	-4.34154	-4.64176	-4.8602	-5.08844	-4.57569	-5.18158	-5.33195	-4.98534	-4.64688	-5.07866	-4.8523	-4.48577	-4.3492	-3.65359	-3.36797	-4.26581	-3.79513	-3.79251	-3.36118	-3.87264	-3.84684	-3.73173	-3.91371	-3.56105	-3.41768	-4.09559	-3.38816	-4.40268	-4.18766	-4.06421	-3.92264	-3.94892	-4.19346	-3.83343	-4.03073	-3.89986	-4.15395	-3.985	-4.03664	-3.29768	-3.50863	-4.28521	-3.98976	-4.13981
YDR072C	1.28777	1.26126	0.85635	1.35741	1.15093	1.41747	1.78162	1.31871	1.6294	1.46215	1.59334	1.30827	1.70405	1.69859	1.65781	1.84312	1.75382	2.00931	1.14171	0.74583	1.14884	1.63253	2.04269	0.91098	1.54706	1.81735	1.60864	1.91391	0.8705	1.87359	1.69175	1.41461	1.16895	1.40269	1.23786	1.28835	1.94952	1.35227	1.98719	1.11421	1.46989	2.03842	1.82512	2.12747	1.31644	1.7969	1.50077	1.62355	1.11731
YKL153W	-4.1166	-4.4274	-4.60419	-3.80996	-3.52284	-4.4104	-4.72329	-4.40556	-4.58218	-5.07977	-4.72447	-4.87037	-4.86927	-4.57904	-4.30538	-4.80589	-4.47027	-4.97219	-4.07156	-3.91953	-3.87911	-4.21065	-3.89489	-4.02351	-4.15918	-4.37529	-3.92471	-4.06361	-3.9843	-3.79138	-3.84034	-4.35577	-4.0265	-3.54524	-3.56973	-4.10028	-3.93147	-4.26617	-4.00314	-3.98113	-3.98907	-3.5919	-4.27719	-3.98289	-3.96648	-4.14575	-3.44432	-4.01976	-4.15608
YDR179C	-2.70246	-2.70982	-2.42624	-2.33423	-2.80865	-2.92765	-3.52941	-2.62298	-3.34617	-2.6953	-2.73909	-2.84129	-3.51813	-3.80122	-3.6929	-4.27399	-3.31692	-3.68572	-3.11175	-2.09921	-2.64037	-2.98634	-3.72438	-2.3946	-2.40824	-2.77431	-2.49198	-2.05986	-2.36278	-2.53855	-2.41393	-2.79033	-3.16889	-4.18766	-2.87562	-2.50146	-3.27314	-2.2447	-3.257	-2.22129	-1.97969	-3.24937	-2.52836	-3.81969	-2.2864	-2.6009	-2.77069	-2.84548	-2.51098
YIL053W	6.38015	6.71077	6.34147	6.99055	6.72599	6.80668	6.34088	6.53145	6.18371	6.532	6.28533	6.4513	6.31995	6.85037	6.47591	6.28539	6.36131	6.55066	6.16916	6.50319	6.06482	6.6346	6.20134	6.45828	6.36954	7.20642	6.79927	6.99153	6.07815	6.81191	6.58108	6.29138	5.89597	6.18983	6.43528	7.0072	6.29747	6.98806	5.96445	6.13969	6.81241	6.93909	6.83989	6.5099	6.86674	6.99305	6.94764	6.94761	6.83235
YGR220C	0.92051	0.57176	0.87407	1.01453	1.17268	0.62571	1.12347	1.19986	0.91842	1.29785	1.11816	1.28576	1.60889	1.40322	1.44816	1.60307	1.77333	1.88241	0.78898	0.8324	1.01867	1.02991	1.03077	1.44157	0.64154	0.72903	0.91678	0.92447	1.03543	0.7306	1.29516	1.18748	0.56693	0.69553	0.8169	0.67968	0.60062	0.74224	0.8243	1.09124	1.04854	0.60782	0.73069	0.62119	1.00341	1.03977	1.13636	1.12628	1.10024
YMR161W	1.97084	2.12986	1.94294	2.08226	1.85651	1.77968	1.63798	1.67187	1.75382	1.65569	1.77939	1.84291	1.53948	1.62379	1.63002	1.61784	1.54368	1.77588	2.17803	2.00008	1.39814	1.63126	1.82888	1.54002	1.58735	2.00416	1.73552	1.876	2.25044	1.76055	1.62692	2.24107	1.84003	1.98641	2.51152	2.26112	1.63552	1.51973	2.06192	1.53421	1.68693	1.91798	2.18843	2.12572	1.55222	2.09047	1.50414	1.22743	1.41759
YER011W	1.35064	1.28267	1.07628	1.57725	1.64932	1.30516	1.54855	0.76322	1.09863	1.14656	1.39001	0.3302	-0.56711	-0.76906	-0.9285	-0.42664	0.00122	-0.50195	2.79147	2.43192	0.89469	2.35103	2.90783	2.05758	4.29278	4.23618	0.19366	0.36688	1.31257	2.16488	1.18173	1.69748	2.46554	3.26358	2.59564	2.5495	2.89437	2.94072	4.59477	2.28569	1.48771	3.2906	2.20041	0.00057	0.53794	2.42238	3.37191	2.84816	-0.18969
YDR258C	3.27896	3.55484	3.46443	3.73128	3.11973	3.21213	3.18338	3.6646	3.76026	3.39928	3.22769	3.52352	2.02711	2.35585	2.41484	2.03609	2.21478	2.47758	3.06573	4.22115	2.65149	2.70512	2.58112	1.53977	2.15981	2.75232	2.68223	2.97384	4.18393	3.129	3.1959	4.08939	2.68601	3.00718	3.93718	3.6557	2.00577	2.82327	2.58545	2.28993	3.03025	2.96915	3.24916	2.90182	2.89354	3.98908	3.12607	2.75549	3.74644
YDR467C	-3.89124	-3.77264	-3.57462	-3.58846	-3.74022	-3.90274	-3.63785	-3.59012	-4.14282	-4.27647	-4.18907	-4.53371	-3.30691	-4.16085	-3.68035	-3.39101	-3.86556	-3.56224	-3.93621	-3.36428	-3.66785	-3.12425	-3.3514	-3.21603	-3.3294	-3.51212	-3.58121	-3.67404	0.82321	-3.31212	-3.42182	-3.0521	-3.64899	-4.25129	-2.5997	-2.93887	-3.61151	-3.16954	-3.0892	-3.12664	-3.04118	-4.03615	-3.60835	-3.05907	-3.6169	-3.45826	-4.108	-3.05268	-3.57288
YGL162W	-0.64091	-0.67467	-0.48489	-0.50815	-0.58581	-0.54914	-0.50369	-0.91001	-0.6874	-0.70488	-0.7162	-0.56678	-1.11389	-1.1681	-1.20783	-1.19485	-1.45248	-1.26501	0.06156	-0.79234	-0.21625	-0.68643	-0.08536	-0.2716	-0.09522	-0.3667	-0.57514	-0.647	-0.84632	-0.65053	-0.41232	-0.46984	0.00393	0.27049	-0.56655	-0.85166	-0.03743	-0.35202	0.05955	-0.58948	-0.56303	0.19711	-0.05236	-0.1944	-0.49007	-0.85713	-0.252	-0.2847	-1.04075
YNL243W	1.64816	1.67117	1.59803	1.46506	1.76103	1.69726	1.81054	2.04701	1.99722	1.90513	2.01953	2.06426	1.93395	2.12796	2.12038	1.85595	2.1587	2.2564	1.78723	2.14423	2.3868	2.09483	1.92559	1.97963	1.89731	1.79721	1.68204	1.37124	1.53448	1.85299	1.46069	1.91994	2.21813	2.27729	1.90276	1.90776	2.10188	2.15266	2.11784	1.96659	1.76894	1.88052	1.52872	1.92992	1.76238	1.98981	2.33515	1.56373	1.82612
YBR234C	2.57611	2.60979	2.41178	2.55997	2.59202	2.53972	3.01673	2.92417	2.95885	2.99366	3.22013	3.0822	3.03124	3.05089	2.88268	2.98709	3.16499	3.11903	2.63147	2.38303	2.7454	2.8374	2.89892	2.42058	3.11228	3.03774	2.85655	2.8602	2.30052	2.60403	3.32044	3.01867	2.68255	2.79894	3.1306	2.85628	2.95893	2.8961	3.17608	2.84692	2.83177	3.20905	2.72021	2.697	2.68476	2.59407	3.24487	2.97429	2.59503
YNL047C	-1.09168	-0.89703	-0.96668	-1.35652	-0.94838	-1.00837	-1.32816	-1.3252	-1.33757	-1.13181	-1.35816	-1.25415	-0.98437	-1.03149	-1.05779	-1.0249	-1.34398	-1.17886	-0.70806	-0.7856	-0.79528	-0.54909	-0.77547	-0.60536	-0.78225	-0.89286	-1.17261	-1.2471	-0.76438	-0.7195	-1.18265	-0.93287	-0.52417	-0.40118	-0.87378	-0.91555	-0.55903	-0.76609	-0.81508	-0.7715	-0.9018	-0.78661	-1.02388	-0.78151	-1.0474	-1.10284	-1.33604	-0.79877	-1.19349
YKL038W	0.8244	0.74299	0.84105	0.73425	0.62931	0.93054	2.05785	1.90259	1.63374	2.04056	1.8012	2.05975	1.33636	1.41744	1.54663	1.69947	1.5858	1.7586	1.07018	0.86045	1.46535	1.44866	1.38828	1.03252	1.19276	1.09799	1.5434	1.45384	1.36754	1.24327	1.09369	0.78612	1.39526	1.39825	0.96064	0.80019	1.25529	0.99203	1.4011	0.93596	1.1472	1.40666	1.75785	2.09182	1.11663	1.03058	1.14381	1.27475	1.38223
YFL053W	-4.13754	-3.60975	-3.95241	-4.01679	-3.88641	-3.84121	-4.44952	-4.52791	-4.39806	-4.69389	-4.19694	-4.57818	-4.57415	-4.90466	-4.5051	-4.9311	-4.53099	-4.37855	-3.42319	-3.55114	-3.87911	-3.95173	-3.11	-3.39528	-4.24107	-4.34704	-2.8843	-2.72138	-3.8212	-3.90973	-3.21671	-3.0521	-3.80448	-3.30883	-4.19256	-4.17963	-3.74617	-3.67279	-3.93641	-3.91678	-3.48907	-3.49846	-3.05238	-3.40151	-3.41219	-4.12571	-3.40791	-2.98774	-4.03208
YOR200W	-3.38589	-2.36257	-2.90411	-2.43508	-3.6172	-3.18015	-2.5907	-2.55365	-2.37673	-2.67318	-2.85184	-2.69344	-2.6725	-3.02909	-2.61737	-1.77218	-3.03101	-2.17906	-2.97394	-2.78718	-2.75427	-2.28835	-1.95893	-3.64468	-2.32689	-1.90246	-2.58823	-2.05034	-3.09443	-1.46843	-2.16352	-2.42672	-2.17738	-1.9693	-2.37848	-2.76844	-3.07322	-2.62895	-1.94975	-2.40813	-3.0809	-2.77171	-2.08628	-1.01279	-3.31138	-1.84821	-2.97934	-2.33228	-2.17996
YKR060W	-2.19219	-1.66148	-1.75664	-1.85155	-1.84652	-1.72325	-1.92618	-1.89799	-1.4678	-1.67182	-1.59859	-1.46161	-1.39624	-1.31977	-1.18026	-1.61953	-1.7121	-1.76318	-1.16599	-1.52975	-1.80615	-1.95782	-2.06704	-0.93585	-2.33501	-2.43259	-1.63178	-2.15288	-1.84096	-1.29464	-1.96332	-1.60075	-1.60931	-1.74776	-1.49686	-1.22058	-1.64389	-1.47792	-1.70752	-1.00455	-1.75481	-1.59257	-1.86106	-2.07001	-1.36835	-1.43998	-1.22285	-2.01571	-1.42203
YPR200C	-1.95297	-3.16237	-3.07138	-3.09603	-3.10701	-3.1284	-3.99091	-3.6667	-3.96819	-3.51725	-3.82077	-3.57811	-3.3023	-3.11944	-3.27765	-2.72696	-3.38199	-2.90354	-2.57311	-2.52209	-3.32922	-3.45907	-3.84166	-3.45985	-2.68859	-2.79461	-3.88903	-3.60303	-3.15667	-2.5111	-2.49322	-3.08217	-2.75606	-3.81701	-3.68001	-3.9369	-3.66994	-3.69909	-4.17248	-3.73604	-2.38257	-2.48947	-2.81198	-3.38385	-2.08312	-2.60861	-3.84221	-3.2436	-2.49973
YLR411W	-1.85119	-1.95856	-1.78457	-1.74752	-1.82543	-2.01242	3.37797	3.67915	4.04341	3.12447	3.59954	3.26031	3.16274	2.62468	3.03611	-0.31301	2.57754	2.03918	2.77839	2.98087	2.94028	2.53304	2.62006	1.71007	-2.05821	-2.13776	-1.66132	-1.73876	3.43896	3.34891	-1.91364	-2.16959	-1.9941	-1.9717	-2.05528	-2.12029	-2.00399	-1.9696	-1.87435	-2.05073	-1.90753	-2.06855	-2.04614	-1.58894	2.31802	3.56482	3.15369	3.58583	-1.46404
YLR318W	-2.06699	-1.95127	-1.98784	-2.11716	-1.85962	-1.62006	-2.44883	-2.13961	-2.43761	-2.13653	-2.5356	-2.25397	-1.9194	-1.44285	-1.8104	-1.59705	-1.73048	-1.87688	-1.67623	-1.8073	-1.79872	-2.10615	-2.28378	-1.60954	-2.35395	-2.29902	-2.03641	-2.31059	-2.12901	-2.05893	-2.44597	-2.21507	-2.10401	-2.32834	-1.89615	-1.77385	-1.84502	-2.19727	-2.28934	-1.79294	-1.96338	-2.31146	-2.01356	-2.39736	-1.9583	-1.85148	-2.16317	-2.1738	-1.62458
YHR150W	-1.71205	-1.42048	-1.67488	-1.42917	-1.56817	-1.58258	-1.39446	-1.26388	-1.40392	-1.26028	-1.53868	-1.30075	-1.83941	-1.66967	-1.53762	-1.25951	-1.67354	-1.73324	-1.45344	-1.36165	-1.37513	-1.28084	-1.52046	-1.66407	-1.48018	-1.12565	-1.59544	-1.5335	-1.5588	-1.42629	-1.64952	-0.86437	-1.15389	-0.71123	-1.53091	-1.53709	-1.10801	-1.07036	-1.55704	-1.71189	-1.43002	-1.24682	-1.52291	-1.29857	-1.30453	-1.41891	-1.49007	-1.20213	-1.5151
YBR045C	-2.27518	-2.15263	-2.16881	-2.19421	-2.18738	-2.16171	-2.92546	-2.17492	-2.25212	-2.6477	-2.56269	-2.48491	-1.36744	-1.29475	-1.55974	-2.01431	-1.21547	-1.57742	-1.81455	-1.53939	-1.35787	-1.56745	-2.54021	-2.14942	-1.48442	-2.13448	-1.90536	-1.9316	-2.01172	-2.00641	-1.51563	-2.14347	-2.26299	-3.44787	-2.31118	-2.30182	-3.05312	-2.46424	-2.7682	-2.01795	-2.41922	-2.82083	-1.90502	-1.8438	-2.33405	-1.97801	-2.10855	-1.38053	-1.3438
YGL219C	1.31174	1.16918	1.32757	1.03354	1.3506	1.37434	1.52003	1.59418	1.36781	1.53938	1.53528	1.38961	1.30634	1.34388	1.3736	0.9557	1.34451	1.27304	1.61881	1.47242	1.72971	1.29122	1.03787	1.63077	1.0177	1.17745	1.35532	0.82542	1.68732	1.30308	1.44591	1.63539	1.78987	1.45144	1.29467	1.52376	1.67678	1.79693	1.07502	1.61515	1.38314	1.31725	1.32596	0.9403	1.61769	1.22478	1.53792	1.58583	1.58456
YFL009W	0.77363	1.1324	0.9309	1.05682	1.07399	1.01719	0.86531	1.02712	0.87508	1.01836	0.95731	0.98556	0.56251	0.90216	0.68798	0.82539	0.93693	1.02009	0.86078	0.72693	0.96061	1.16805	1.28706	0.79592	1.1494	1.09327	1.00932	1.18336	0.64688	1.0173	0.99551	0.7979	1.09382	0.86233	0.89484	0.68982	1.2476	0.83709	1.17903	0.68671	1.00727	1.12653	1.00874	1.244	0.75081	0.89762	1.03816	1.19071	0.99657
YKL195W	2.41622	2.23038	2.31507	2.22264	2.53975	2.22942	2.46009	2.57078	2.98013	2.7037	2.93844	2.45474	2.72881	2.15131	2.30576	1.92059	2.01726	2.43324	1.44825	2.66985	2.38798	2.59686	2.2508	2.84312	2.03063	2.47628	2.16336	2.28269	2.03162	1.93919	2.56443	2.7657	1.59082	2.01238	2.1868	2.77523	1.68034	2.35836	2.19128	2.7143	2.44024	1.87724	1.92926	1.95335	2.11903	2.58052	2.21698	2.02204	2.19286
YMR039C	0.95602	0.789	1.06919	0.91787	0.42942	0.66476	0.17028	0.3759	0.54135	0.37474	0.62735	0.12908	0.21771	-0.1587	-0.15334	-0.52596	-0.29739	-0.34796	-0.41456	1.43274	-0.09065	-0.08953	-0.64627	0.21015	0.40999	0.30871	0.13402	0.63546	1.35103	0.57429	0.8346	-0.17221	0.25415	-0.43262	0.89446	0.91904	-0.90835	0.74916	-0.26762	0.69144	0.64604	-0.29486	0.44991	-0.42657	0.29842	0.92343	-0.20487	-0.06288	0.23083
YGL147C	3.84893	3.60619	3.88191	3.98063	3.70788	3.66718	4.65639	4.50886	4.92742	4.55219	4.81273	4.67425	4.79439	5.02406	5.20175	5.00465	5.12602	5.1155	4.34761	4.15591	3.93751	3.56154	3.9441	4.516	4.09217	4.03287	4.06331	3.98679	4.23972	4.00655	4.85287	4.79285	4.04702	4.07511	4.45899	4.34992	4.38334	4.00278	4.11657	4.17498	4.72159	4.54111	4.19826	4.36009	4.18945	4.07525	4.72546	3.96986	4.44899
YPR127W	0.72739	0.66752	0.81001	0.40175	1.24705	0.62424	0.62363	0.9635	0.34557	0.82797	0.64018	0.88944	0.03003	-0.02843	-0.2969	-0.09151	0.14711	0.08763	1.43063	0.53144	2.28298	2.03494	1.47873	1.18943	2.38922	2.55375	2.72361	2.01974	1.3144	0.30916	1.33619	1.44796	1.44623	1.25454	1.07247	0.55354	1.99182	1.49737	1.04335	0.76983	1.17409	1.55004	1.08682	0.76864	1.10656	0.19757	1.87526	2.60135	2.06592
YPL188W	0.33846	-0.00261	0.15391	0.25804	0.41311	0.3489	0.75593	0.75118	0.5544	0.711	0.73268	0.65948	0.37186	0.40439	0.51362	0.36366	0.75547	0.50355	0.36353	0.0937	0.56223	0.32164	0.701	0.1968	0.3429	0.04901	0.91624	0.56273	0.17131	1.19019	0.88143	0.3646	0.13514	-0.47546	0.2753	0.12772	0.61733	0.10939	0.35903	0.28772	0.72374	0.7201	0.26597	0.16204	0.6623	1.48976	0.70509	1.00858	0.54084
YDR217C	-1.31023	-1.06811	-1.29969	-1.42127	-1.44919	-1.33084	-1.93926	-1.69462	-1.55783	-1.61449	-1.67727	-1.56429	-2.1887	-2.19433	-2.30207	-2.02846	-2.19936	-2.21166	-1.57163	-0.97846	-1.30302	-1.49719	-2.0215	-1.23129	-1.31758	-1.40999	-1.4735	-1.78751	-1.2229	-1.3679	-1.71406	-1.23661	-1.34542	-1.16447	-1.38918	-1.18898	-1.53968	-1.09782	-1.57424	-1.12721	-1.31851	-1.79078	-1.51663	-1.5495	-1.62632	-1.3468	-1.84657	-1.85808	-1.50249
YML015C	-0.91917	-0.91322	-1.05122	-1.29414	-1.11497	-1.21912	-1.25736	-1.2314	-0.88117	-0.96631	-0.96201	-1.00642	-0.88036	-1.15864	-1.12601	-1.10437	-1.32625	-1.10948	-0.86707	-0.70945	-0.67087	-1.07224	-1.42691	-0.87502	-1.39173	-1.47739	-0.70232	-0.70548	-0.78266	-0.87059	-0.99854	-0.85719	-0.65448	-0.58499	-1.05553	-0.82249	-0.97708	-0.41671	-1.32063	-0.85089	-1.06308	-1.30358	-0.65603	-0.54275	-0.96104	-0.82212	-1.05877	-1.36133	-0.80607
YJR126C	0.77965	0.8603	0.82338	0.96813	0.9822	0.92912	1.00129	1.06383	0.87432	0.84749	0.90295	0.8512	0.70829	1.06099	0.95371	1.02373	1.0179	0.88665	0.61619	0.91816	1.05082	0.86478	0.75611	0.39637	0.7011	0.62213	0.80538	0.82136	0.47532	0.49684	0.65155	0.86766	0.91349	0.96965	0.79083	0.76549	0.88846	1.11495	0.86107	0.61317	0.93859	0.97318	0.40289	0.63484	0.79152	0.58352	1.02752	0.96441	0.74084
YPR026W	0.61781	0.68375	0.41872	0.66513	0.5726	0.65747	1.52081	1.76685	1.48197	1.68399	1.50737	1.7277	0.65206	0.89167	0.87387	0.96656	0.99314	0.88046	0.97414	0.42253	1.69127	1.82087	1.75058	0.73216	1.7525	1.43596	1.62735	1.45737	0.26803	0.54241	1.45182	0.69716	1.1286	-0.15818	0.46501	0.69628	1.48948	1.20004	1.36603	0.59846	1.29269	1.47518	0.88611	0.87423	1.07091	0.48145	1.18358	1.60573	1.21112
YHR073W	0.97699	1.00636	1.0802	0.93153	0.97954	0.91719	0.82024	0.86869	0.95592	0.89112	0.77724	1.0343	0.94399	1.04202	1.08643	0.89883	1.06743	1.05924	1.18024	1.50974	1.05623	0.67018	1.00347	1.17681	0.63858	0.74214	0.87113	0.75712	1.24203	0.73723	0.83242	0.83737	1.31914	0.89811	1.32035	1.24244	0.73589	0.82401	0.88502	1.20281	0.71501	0.86501	0.77344	0.85935	0.84257	0.82301	0.76745	0.76877	1.11318
YMR274C	-0.57682	-0.5289	-0.5187	-0.35978	-0.64795	-0.55164	-0.51683	-0.65383	-0.48567	-0.59262	-0.82754	-1.11865	-0.22314	-0.60615	-0.55223	-0.43205	-0.50666	-0.81035	-1.00022	-1.41116	-0.88029	-0.57805	0.23852	-1.046	-0.16009	-0.09606	-0.08721	0.16777	-1.34533	-0.34313	-0.11002	-1.59024	-0.84941	-1.53274	-0.77349	-1.29548	-0.33917	-0.79452	-0.26438	-1.25547	-0.38981	0.08347	-0.28923	-0.46446	-0.61372	-0.80772	-0.74675	-0.09411	-0.47691
YHR125W	-4.51899	-4.86209	-4.75682	-5.11117	-5.04197	-4.96887	-4.82634	-4.89587	-5.588	-5.46145	-4.63413	-4.78817	-5.18299	-4.80988	-5.28572	-5.18083	-4.76109	-5.09904	-4.38076	-4.0191	-4.60137	-4.44645	-4.17051	-4.50827	-4.44126	-3.67004	-4.29258	-4.07334	-4.26556	-4.09549	-4.1296	-4.40117	-4.33867	-4.36757	-4.34755	-4.21678	-4.20568	-4.65413	-4.21774	-4.25439	-4.15132	-3.60152	-3.88404	-4.13018	-4.48554	-4.63283	-4.19568	-4.03018	-4.29507
YDL227C	-4.18385	-4.17098	-4.19163	-4.01184	-4.3557	-3.95797	-4.80791	-4.52791	-4.60316	-4.6576	-4.63837	-4.69246	-4.67337	-4.39432	-4.54209	-4.7271	-4.50015	-4.36447	-1.8337	-2.06054	-2.70419	-2.2276	-2.11732	-0.62542	-2.40296	-2.4643	-3.88903	-3.88488	-1.97157	-3.40271	-3.91217	-3.74201	-2.22768	-1.30767	-3.93343	-3.87572	-2.34007	-1.95909	-1.98296	-1.1644	-3.8561	-3.63749	-3.77836	-3.77582	-3.922	-3.45065	-3.87836	-3.76048	-3.69247
YER119C-A	-4.31579	-4.14866	-4.09292	-4.07894	-4.5061	-4.31294	-4.65707	-4.11043	-4.69741	-4.30834	-4.21964	-3.65595	-4.39544	-4.30558	-4.51748	-5.11113	-4.77498	-4.72603	-3.88785	-3.56039	-3.36882	-4.07746	-3.92309	-3.50939	-4.32662	-4.0369	-3.61325	-3.74859	-0.87451	-3.92769	-4.21318	-4.32492	-2.78113	-3.33431	-3.6238	-3.68755	-3.6996	-4.00086	-4.15587	-3.24224	-4.20038	-3.4395	-3.86858	-3.52511	-3.86105	-4.55933	-3.97024	-4.08233	-3.78829
YMR008C	2.51465	2.43661	2.16798	2.43754	2.24065	2.31496	2.44209	2.43964	2.72173	2.36941	2.32045	2.51083	2.54017	2.57575	2.32991	2.77758	2.7771	2.58606	3.01321	2.99911	1.4187	1.89822	2.76234	1.77485	2.40016	2.48378	1.99107	3.05043	2.35476	3.04725	2.76092	2.51774	2.35992	1.904	2.89452	2.81254	1.72986	1.63322	2.73156	2.44299	2.02511	2.46703	2.05906	2.3981	1.52768	2.52692	1.42814	1.36663	2.14199
YOR197W	1.44379	1.47504	1.56326	1.39179	1.67484	1.56758	1.62185	1.57792	1.37314	1.6648	1.61038	1.91384	1.76038	2.20625	2.29284	2.02496	2.18357	2.03884	1.76099	1.66865	1.5485	1.45368	1.06977	1.24545	1.36236	1.29045	1.344	1.33373	1.42607	1.58837	1.19057	1.76289	1.65178	1.76606	1.70574	1.93336	1.82666	1.43023	1.50526	1.70741	1.65282	1.6066	1.4352	1.28242	1.43029	1.68151	1.95397	1.56829	1.56619
YKL096W-A	5.65997	4.97538	5.76949	4.59374	5.78163	4.29708	5.8403	5.01268	5.97722	5.7381	6.06828	5.62942	6.13401	5.84061	6.14173	5.9035	5.84131	5.96592	6.39609	4.53093	6.06454	5.12141	6.36002	4.91478	6.42083	4.78893	6.62718	6.09671	5.64251	5.65756	6.69075	5.84218	5.93228	5.56954	6.12202	5.0164	6.23329	4.69101	6.24179	4.81294	6.50864	6.53979	6.04408	6.31858	6.1446	5.16427	6.84764	6.28783	6.4365
YNL081C	1.83553	1.70306	2.01867	1.70768	1.79583	1.57724	2.19691	2.62126	2.56947	2.08957	2.37235	2.40228	2.28964	2.21026	2.58998	2.69285	2.49258	2.62258	2.35876	2.11882	2.51232	2.15316	1.76317	2.63372	1.71557	1.50039	2.47918	2.23546	2.39737	1.82654	2.26748	2.65823	2.21619	1.27905	2.58456	2.45484	2.24154	2.1061	1.51582	2.45466	1.89997	1.6117	2.06141	1.62988	2.02508	2.05864	2.04601	2.42028	2.54288
YDR532C	-1.57001	-1.59414	-1.28523	-1.41542	-1.70332	-1.57372	-1.90189	-1.50424	-1.74902	-1.5482	-1.5315	-1.79036	-2.16948	-2.40685	-2.4582	-2.36745	-2.71417	-2.79586	-2.23678	-1.39215	-1.33802	-1.96126	-2.64921	-1.4452	-1.58405	-1.89884	-1.2873	-1.19857	-1.33682	-1.91319	-1.00947	-2.33679	-2.06987	-3.25471	-1.81545	-1.62868	-2.49336	-1.54136	-2.45925	-1.60225	-1.3263	-2.20626	-1.33133	-2.89268	-1.3386	-1.64752	-2.30983	-1.95973	-1.53815
YDR049W	-0.92376	-1.03058	-0.74413	-0.83015	-0.56879	-0.6117	-0.92058	-0.76029	-0.73904	-0.82926	-0.72646	-0.59646	-0.4159	-0.54939	-0.52759	-0.56581	-0.94259	-0.72474	-1.29295	-0.77695	-0.83094	-1.02802	-1.11059	-0.30716	-1.19052	-1.05251	-0.95997	-1.44748	-0.65326	-0.95823	-1.04617	-0.46696	-0.61033	0.03205	-0.53808	-0.82673	-1.01083	-0.73638	-0.82157	-0.50671	-0.82582	-1.00916	-0.88038	-0.72405	-1.17393	-0.93268	-0.9566	-1.18155	-0.84193
YNL319W	-4.53754	-4.43616	-4.38836	-4.56487	-4.26545	-4.47166	-4.23456	-4.50823	-4.542	-3.9878	-4.83344	-3.71585	-4.22945	-3.85195	-4.39478	-4.05741	-4.00028	-4.17463	-3.91163	-3.43123	-3.42464	-3.64459	-3.4898	-3.77638	-3.43907	-3.64987	-3.79476	-3.90642	-2.75993	-3.9158	-3.8167	-4.24163	-3.91525	-2.79243	-3.54532	-3.64731	-3.43729	-3.20499	-3.63925	-3.87202	-3.88894	-3.88531	-3.93752	-3.6141	-3.45774	-3.80559	-3.83939	-3.62047	-3.9179
YBR113W	-4.19218	-4.55428	-4.41783	-4.23478	-4.31161	-4.68049	-3.76578	-4.20519	-4.00283	-2.96084	-4.01867	-4.26556	-3.91323	-3.66804	-3.89739	-4.2089	-3.90638	-4.47867	-3.57582	-3.6264	-3.34516	-3.87226	-3.92309	-3.76873	-3.88855	-4.01374	-3.83563	-3.8574	-3.60797	-3.66942	-3.37627	-4.2562	-3.66623	-4.01481	-3.38733	-3.68755	-3.23219	-3.97505	-3.69952	-3.819	-3.79168	-3.92109	-3.45453	-3.79068	-3.12541	-3.33809	-3.41947	-3.74673	-3.78829
YKL170W	1.04264	1.23139	1.07455	0.98153	1.44575	0.98031	1.69872	1.88523	1.53717	1.9438	1.55592	1.55909	1.73087	1.81741	1.79876	2.163	2.17918	2.03967	1.37678	1.35533	1.82677	1.61254	1.46833	2.07479	1.0502	0.84974	1.28188	1.2148	1.31708	0.65215	1.58661	2.01416	1.38008	1.86384	1.41473	1.18066	1.33049	1.51112	0.88205	1.7338	1.28269	0.85822	0.68707	0.75971	1.32361	1.3365	1.40351	1.53053	1.50012
YJL043W	-3.11804	-2.55407	-3.4503	-3.10366	-3.2524	-3.72859	-3.58451	-3.53821	-3.5149	-3.85163	-3.54384	-3.64224	-3.89582	-4.52003	-4.43566	-4.75847	-4.26998	-4.15328	-2.3409	-2.84847	-2.89819	-2.88076	-2.15286	-2.71815	-3.05036	-2.96191	-2.77917	-2.8034	-2.6309	-2.3303	-3.06228	-2.70746	-1.96921	-1.18226	-2.12891	-2.66762	-2.64729	-2.96134	-2.42976	-2.8288	-2.9286	-2.46915	-2.48927	-2.17769	-3.01426	-2.34576	-2.97753	-2.90463	-2.41388
YGL047W	0.76306	1.041	0.91499	1.14118	1.00948	0.73661	1.22439	1.35539	0.80944	1.30166	1.3358	1.29263	1.08147	1.1861	1.31954	1.15054	1.27918	1.17585	1.0215	1.09785	0.99338	0.9876	0.89314	1.09596	1.08013	1.165	0.97504	1.19881	1.15549	0.92858	0.9824	1.4887	1.11923	1.33768	0.88906	1.09546	0.73628	1.03451	1.12157	1.42594	0.78929	0.65195	0.9111	0.93817	1.51562	1.04389	1.35033	1.30657	1.20071
YLR006C	1.41302	1.10949	1.16749	0.90172	1.4571	1.37242	1.42626	1.43515	1.37233	1.36438	1.33396	1.37113	1.04441	1.10119	1.20559	1.21174	1.1663	1.31025	1.41592	1.37949	1.35984	1.28398	0.99263	0.95115	1.24619	1.45104	1.19912	0.83472	1.31505	1.08314	0.98992	1.23436	1.19795	1.09472	1.55898	1.53414	1.56425	1.32785	1.0376	1.04906	0.99509	1.19641	0.98884	1.00761	1.42312	1.14703	1.53999	1.30867	1.20518
YHR079C	-0.21925	-0.31429	-0.47863	-0.43308	-0.24593	-0.39625	-0.16326	-0.23478	-0.35638	-0.23668	-0.27928	-0.27147	-0.16399	-0.05743	-0.21185	-0.25686	-0.10244	-0.2323	-0.21916	-0.31667	-0.37021	-0.3622	-0.17658	-0.44222	-0.00477	-0.19644	-0.32342	-0.67151	-0.62138	-0.46928	-0.25975	-0.37978	-0.38703	-0.33692	-0.52014	-0.38082	-0.13228	-0.25527	-0.12504	-0.41673	-0.11707	0.00041	-0.39421	-0.32719	-0.50998	-0.58494	-0.51387	-0.40217	-0.63722
YPR171W	-0.25601	-0.57061	-0.19324	-0.49949	-0.2885	-0.288	-0.53559	-0.50053	-0.73096	-0.57554	-0.49231	-0.7396	0.00374	-0.19789	-0.43197	-0.66711	-0.55725	-0.66274	-0.22046	-0.37683	0.08092	-0.2839	-0.4609	0.07093	-0.54137	-0.2121	-0.33841	-0.60391	-0.08388	-0.74992	-0.65774	-0.5735	-0.18216	-0.15041	-0.34044	-0.17764	-0.01598	-0.04468	-0.41817	0.21392	-0.55357	-0.61815	-0.23215	-0.30115	-0.06454	-0.34846	-0.67583	-0.53556	-0.35226
YML063W	3.94509	3.62833	4.06428	3.77073	4.09144	3.9703	5.03739	4.52359	4.98095	4.89454	4.98713	4.86714	5.27489	5.29006	5.50222	5.4152	5.49379	5.44228	4.63749	4.36488	4.18001	3.89911	4.04736	4.67125	4.30476	4.11926	4.01006	4.07512	4.29891	4.00676	5.22375	4.71998	4.43502	4.35007	4.33313	4.40568	4.36186	4.23941	4.19383	4.73803	4.75933	4.1924	4.27871	4.13507	4.48316	4.18786	5.04274	4.43701	4.66057
YLR178C	2.93493	3.32883	3.03839	3.06121	3.38362	3.41319	4.22576	4.61017	3.9099	4.61152	4.23671	4.36551	3.0257	3.09785	3.45894	3.76959	3.27429	3.78069	4.00199	3.49953	4.97796	4.74491	4.70461	3.81879	4.53521	4.85977	5.16501	4.47566	2.7312	2.67747	4.72537	4.81024	4.1219	3.56906	2.72939	2.64219	4.31591	4.24727	3.70975	3.70278	4.37348	4.95381	2.59785	2.79769	4.54446	3.22206	5.50494	5.96779	4.61971
YHL029C	0.83807	0.81317	0.73157	0.59747	0.85115	0.90001	0.70515	0.51475	0.65163	0.61352	0.72182	0.54208	1.30078	1.15613	1.19556	1.36412	1.14451	1.44067	0.71114	0.27434	0.43984	0.53587	1.17122	0.95408	0.80578	0.4137	0.64198	0.45542	0.08885	1.07761	0.81635	0.80695	0.73722	1.08311	0.51479	0.68283	0.8912	0.40595	1.03269	0.66871	0.70673	0.92694	0.73581	0.77892	0.54198	0.65952	0.81956	0.5866	0.7184
YJL090C	-0.81949	-0.77803	-0.46069	-0.78848	-0.77487	-0.64699	-0.74381	-0.69968	-0.76427	-0.82431	-0.85779	-0.79631	-0.90753	-0.87894	-0.79227	-0.80346	-1.04873	-0.86252	-0.50611	-0.63109	-0.7559	-0.83358	-1.028	-0.62638	-0.59057	-0.7365	-0.90001	-0.99133	-0.63129	-0.79929	-0.81219	-0.71447	-0.78062	-0.52701	-1.04954	-0.7714	-0.4982	-0.67476	-0.95953	-0.63372	-0.67385	-0.82537	-0.81758	-1.057	-0.58307	-0.86298	-0.98639	-0.61374	-0.75466
YOR184W	2.19206	1.98082	2.225	2.02587	2.32699	1.99479	2.19861	2.07522	2.20846	2.02187	1.90249	1.8515	1.81037	2.48798	2.46866	1.98902	2.35962	2.207	2.27178	1.79758	2.23148	2.29674	1.47951	2.44221	1.91993	1.83327	1.7941	1.876	2.22765	1.9307	2.23098	1.42267	1.9826	1.74702	2.00556	2.13555	2.05328	2.0045	1.85547	2.76628	2.16732	2.51524	2.20517	2.2545	1.92288	2.10752	2.34526	1.87359	2.45923
YBR008C	-1.2201	-1.23225	-1.62723	-1.3985	-1.06782	-1.23969	-1.18665	-1.5038	-1.17709	-1.09336	-1.20341	-1.24081	-1.31099	-1.49143	-1.95407	-1.18712	-1.75176	-1.48497	-0.41924	-0.66297	-1.18265	-0.95185	-0.45749	-1.13658	-0.59984	-0.75785	-1.2209	-1.34744	-1.21381	-0.44347	-0.99744	-1.03575	-0.3383	-0.20874	-0.8964	-1.23092	-0.83904	-1.08284	-0.53342	-0.86482	-1.31418	-0.67974	-1.18433	-0.64369	-1.43411	-1.3757	-1.39069	-0.73384	-1.35699
YDR372C	1.37902	1.50331	1.41124	1.39464	1.49046	1.66921	1.41095	1.68823	1.38511	1.42215	1.52505	1.47734	1.68364	1.6831	1.79469	1.53352	1.56331	1.69307	1.54212	1.59883	1.15194	1.34296	1.21264	1.42885	1.41935	1.44741	0.90346	0.99489	1.41072	1.57036	1.28853	0.77988	1.21397	0.22265	1.59274	1.73071	1.44709	1.3468	1.31967	1.56408	1.28404	1.16301	0.98697	1.06309	1.55137	1.51614	1.4352	1.37742	1.67097
YHR218W	3.11514	2.96785	3.0879	3.08746	3.33175	3.20169	1.89743	1.86502	2.02835	1.83734	1.95867	1.94818	2.02536	1.89985	1.86227	1.90102	1.92257	1.55983	2.44371	2.99763	1.64754	1.86659	2.95842	2.5295	2.90448	2.96421	1.75816	2.01468	2.59816	2.98961	2.41102	2.90677	2.40011	2.65817	2.62596	2.53473	1.73712	1.59798	3.21743	2.81347	2.16405	2.38205	3.00308	3.0514	2.26324	3.00624	2.3666	2.01736	2.44832
YMR203W	2.95478	2.75692	2.60308	2.90585	2.77295	2.66668	3.44256	3.37205	3.46763	3.42742	3.31489	3.46084	3.88555	4.0534	3.93262	4.07392	4.47471	4.0836	2.9704	2.90466	2.74645	3.23508	3.62984	2.94003	3.14283	3.22002	3.25794	3.7601	2.60345	3.05271	3.96694	2.69523	2.4775	2.30936	3.0651	2.95004	2.91838	2.82365	3.26323	2.87129	3.24701	3.75213	2.73661	3.28389	2.76098	2.91395	3.48487	3.44672	2.87124
YIR008C	0.0295	-0.01605	0.06443	0.09707	0.23577	0.25358	0.14655	0.29878	-0.04711	0.17306	0.18351	0.49345	0.37039	0.7808	0.62449	0.54536	0.49426	0.58443	0.26654	-0.47033	-0.01619	-0.44639	-0.16454	0.32797	-0.2836	-0.43567	0.24402	-0.17012	0.01903	-0.02705	-0.06096	0.38289	0.21952	0.20611	0.19056	0.12051	0.17032	-0.38009	-0.16276	0.00025	-0.08001	-0.15706	-0.02341	0.14619	-0.16861	-0.01892	0.06401	-0.13737	0.30218
YBL024W	0.65726	0.24127	0.65988	0.49935	1.14626	0.91404	0.80392	0.72417	0.80472	0.75267	0.78652	0.96539	1.21147	1.38099	1.39243	1.19373	1.34143	1.30642	0.74772	0.65176	0.82338	0.56111	0.71893	1.78524	0.34667	0.55897	0.45495	0.32219	0.42544	0.78589	0.30637	0.01288	0.34121	-0.05534	0.40798	0.99792	0.80906	0.81768	0.72272	1.48023	0.73814	0.68532	0.50143	0.24398	1.18647	0.64285	1.02696	0.15577	1.0538
YDR317W	-3.62962	-3.48985	-3.17817	-3.18131	-3.19709	-3.00357	-4.64941	-4.75521	-4.80653	-4.86897	-4.66795	-4.75448	-4.43049	-4.42704	-4.07567	-4.93118	-4.43637	-3.85086	-3.6812	-3.32179	-3.89373	-3.86766	-3.74635	-3.77252	-3.93733	-3.6612	-3.40526	-3.26372	-2.78266	-3.68844	-3.98151	-4.24181	-3.51766	-3.66803	-4.18751	-4.08427	-2.97823	-2.78629	-3.96871	-3.86779	-3.87798	-3.70408	-3.39853	-3.84207	-3.10561	-3.79655	-3.23987	-2.91468	-3.81302
YOL166C	-4.99909	-4.63856	-4.40421	-4.66899	-4.88363	-4.70284	-4.49289	-4.33719	-4.7036	-4.29713	-5.06497	-4.95847	-4.31865	-4.3627	-4.2914	-4.24084	-4.69405	-4.00655	-4.38899	-3.43374	-4.56491	-3.83985	-4.55734	-3.88587	-4.0349	-4.37009	-4.14602	-4.03392	-2.70413	-3.81698	-3.73334	-3.81564	-4.22169	-3.84755	-4.05604	-3.76522	-4.16864	-3.82653	-3.83513	-3.71962	-4.1909	-4.06812	-3.99665	-4.00161	-3.97865	-4.08288	-3.66171	-3.90776	-4.21728
YJL087C	-1.4397	-1.18589	-1.29196	-1.40746	-1.30265	-1.2434	-1.50191	-1.30723	-1.37723	-1.35891	-1.34073	-1.41923	-1.10779	-0.9441	-1.05938	-1.08393	-1.20314	-1.17573	-1.80658	-1.32516	-1.47782	-1.63343	-1.67873	-1.14968	-1.82357	-1.89433	-1.62731	-1.92696	-1.81866	-1.49188	-1.8065	-1.25964	-1.26106	-1.49639	-1.47583	-1.31525	-1.63224	-1.33045	-1.45784	-1.11957	-1.43252	-1.58829	-1.69838	-1.44737	-1.38931	-1.33194	-1.70952	-1.55556	-1.20992
YJL038C	-3.31691	-4.17098	-4.22564	-4.33801	-4.43285	-4.32216	-3.94175	-3.71905	-4.02408	-3.8891	-3.55638	-3.66821	-3.9057	-4.44632	-3.68601	-4.25844	-4.35761	-3.99074	-3.52639	-3.09799	-3.41825	-3.78234	-3.73477	-3.69473	-3.78121	-3.49394	-3.5653	-3.77512	-3.27807	-3.38099	-3.50421	-3.94783	-4.13012	-4.07557	-3.72602	-3.53997	-3.54335	-3.63883	-3.54516	-3.66518	-3.52304	-3.75879	-3.30603	-4.43627	-3.84214	-3.20527	-3.65279	-3.80218	-4.09215
YDR043C	-0.79455	-0.52069	-0.6024	-0.59102	-0.95471	-0.78457	0.35155	0.52863	0.64687	0.53341	0.36109	0.47286	-0.08065	-0.22281	-0.00427	0.07201	0.05152	0.21419	0.5812	0.59546	0.87384	0.9677	0.58574	0.05731	0.46841	0.9322	0.62774	0.47162	0.45761	0.26899	0.07952	-0.51443	0.35443	-0.71562	-0.48532	-0.34301	0.61917	0.62618	0.74091	0.47533	0.31915	0.7657	-0.03475	-0.27247	0.93178	0.60967	-0.37528	1.22867	-0.52661
YHR028C	1.44796	1.36889	1.46523	1.63211	1.70085	1.69891	1.06486	1.34163	1.11698	1.22905	1.10522	0.9862	0.62648	1.17617	1.11643	0.9164	1.19424	1.08933	1.37321	1.5753	1.76837	1.55068	1.14369	0.81148	1.20299	1.14163	1.21956	1.19743	1.12844	0.69966	1.13502	0.57444	0.71397	0.31785	1.28633	1.26955	0.90373	1.16621	0.94993	1.0077	1.52403	1.46477	0.86101	0.6147	1.29154	1.15604	1.45667	1.61583	1.47169
YOR340C	-1.50617	-1.19543	-0.91306	-0.9987	-1.00848	-1.26138	-0.91803	-1.63356	-0.95179	-1.23014	-1.31283	-0.26584	-0.94988	-1.15736	-0.81458	-0.34468	-1.12047	-1.13259	-0.75342	-1.06246	-1.51589	-1.45796	-0.81986	0.18941	-1.37009	-0.83127	-0.76781	-1.32314	-0.61771	-0.26179	-1.18542	-0.5697	-1.54586	-0.11587	-0.75508	-0.57166	-0.95495	-1.33949	-0.65319	-0.62807	-0.76705	-0.46522	-0.78718	-0.0146	-1.02164	-1.2205	-0.80834	-1.94655	-1.07784
YCL044C	2.62049	2.70164	2.75857	2.69025	2.28764	2.19998	2.75318	2.47299	2.44627	2.62006	2.5259	2.5217	2.58342	2.59064	2.47663	2.33106	2.31173	2.50128	2.79706	2.38871	2.30507	2.75089	3.09066	2.00608	2.85901	2.88528	3.20541	3.43937	2.69482	3.33564	3.07153	2.45401	2.02353	2.27758	2.82822	2.52884	2.72182	2.44814	2.80318	2.17931	2.79961	2.93381	3.13825	3.481	2.65618	2.90337	2.70863	2.72309	2.83629
YFR022W	0.10036	-0.06291	0.2491	0.02522	-0.22231	-0.00826	-0.67876	-0.56781	-0.95727	-0.63056	-0.79526	-0.65339	-0.91571	-0.9015	-1.15653	-0.52842	-1.00232	-0.72411	0.19855	-0.24287	-0.42003	0.00542	1.1037	-0.53112	0.55597	0.59385	-0.05028	0.04085	-0.42975	-0.20538	-0.23649	-0.42376	0.08442	0.11705	0.0327	-0.47013	0.01221	-0.27088	0.55829	-0.62394	-0.44397	0.03452	0.06355	0.33238	-0.63705	-0.60287	-0.15766	0.64875	-0.40403
YEL072W	-2.45502	-1.57071	-1.96466	-2.22801	-1.71258	-1.96513	-1.9995	-1.7446	-1.99638	-1.76302	-1.88503	-1.36779	-2.3713	-1.97679	-2.28032	-2.02484	-2.46864	-2.07308	-1.59136	-1.95848	-2.16399	-1.86579	-1.79171	-1.44925	-1.90985	-1.80848	-1.9544	-1.9744	-2.45442	-1.85167	-1.48727	-0.8727	-1.47005	-1.98257	-1.81926	-1.85799	-1.40195	-1.67347	-1.55811	-1.46705	-1.8702	-2.19789	-1.86552	-1.26235	-1.55112	-1.71705	-1.87021	-1.76852	-1.87189
YIR010W	-0.74269	-0.90587	-0.56292	-0.70953	-0.55121	-0.7658	-0.76749	-0.90209	-0.93041	-0.99596	-0.76561	-0.68179	-0.99507	-1.0229	-1.08204	-1.15152	-1.39513	-1.38795	-1.11743	-0.7079	-0.63897	-0.54167	-1.10651	-0.19475	-0.71508	-0.63536	-0.71402	-0.93592	-0.31563	-0.86364	-0.921	-0.5192	-0.49688	-0.39828	-0.81317	-0.62527	-0.73338	-0.36185	-0.44399	-0.34804	-0.70524	-0.85968	-0.68258	-0.80897	-0.83088	-0.60829	-0.91956	-1.2196	-0.89879
YBL008W	-1.71024	-1.31302	-1.53904	-1.61889	-1.60796	-1.6517	-1.55511	-1.4306	-1.48046	-1.44861	-1.60312	-1.27756	-1.4861	-1.08325	-1.30951	-1.06174	-1.48305	-1.18016	-1.19978	-1.17627	-1.53168	-1.45973	-1.77933	-1.30933	-1.81593	-1.96009	-1.74601	-1.5819	-1.68476	-1.40727	-1.64481	-1.13614	-1.45435	-1.45788	-1.13507	-1.07272	-1.74923	-1.63181	-1.56752	-1.28126	-1.58424	-1.42437	-1.65079	-1.29606	-1.77474	-1.50842	-1.71998	-1.46198	-1.36362
YMR178W	1.32366	1.56947	1.43282	1.52384	1.47987	1.56774	1.29963	1.24599	1.06995	1.02271	1.20298	1.22136	0.43597	0.68712	0.71948	0.66038	0.9615	0.80663	1.27971	1.40327	1.46337	0.84021	0.55286	0.99356	1.19686	1.33037	0.91509	1.13693	1.30669	0.91111	1.30094	0.96378	1.57909	1.03687	1.3953	1.23369	1.24507	1.56891	0.54965	0.97332	1.3358	0.72484	1.24453	1.11966	1.76739	1.2358	1.70036	1.34482	1.38007
YOL008W	0.08153	0.02333	-0.03779	0.13417	0.1648	0.15158	0.333	0.2796	-0.0269	0.39448	0.32205	0.1201	0.47681	0.55354	0.28966	0.39772	0.77292	0.64216	0.26231	0.04337	0.03028	0.17943	0.1298	0.08991	0.10755	0.23718	0.1208	0.47679	0.06435	0.34304	0.07309	0.26915	-0.12923	-0.31106	0.12763	-0.17512	0.32973	-0.23895	0.20141	0.04877	0.27283	0.51092	0.16504	-0.17284	0.04555	0.10768	0.28215	0.55782	-0.00221
YHR017W	1.02535	1.042	1.09241	1.15846	0.59257	0.92132	1.52724	1.61846	1.24563	1.33649	1.28695	1.39969	1.23995	1.22488	1.71557	1.18947	1.53135	1.44798	1.12719	1.18411	1.15269	0.93099	1.04589	0.57855	1.1248	1.14293	1.27275	1.10339	1.26734	1.2064	1.04484	1.23805	1.01755	1.0202	1.22018	0.80408	1.41784	1.32282	1.01182	0.77381	1.40352	1.47079	1.55509	0.76028	1.32494	1.33924	1.1757	1.70178	1.04283
YMR095C	-3.58874	-2.86384	-3.20338	-3.065	-2.95817	-3.03322	-2.13481	-2.1341	-2.83218	-2.16518	-2.63229	-2.13463	-3.87549	-3.79735	-3.8768	-3.59675	-3.93921	-4.19024	-1.98323	-2.43329	-2.65852	-2.7047	-2.46815	-2.50274	-3.25976	-3.08656	-2.28517	-2.35046	-3.26635	-2.54696	-0.54806	-1.5274	-2.49583	-3.15146	-2.31806	-1.75841	-3.30028	-3.46816	-2.95975	-2.55462	-2.56585	-2.11984	-3.23506	-3.06018	-3.37798	-2.58517	-3.18383	-1.84532	-2.80703
YKR101W	-1.95524	-1.64663	-1.62874	-1.67421	-1.79084	-1.63358	-1.75859	-1.71143	-1.99386	-1.85529	-1.93142	-1.63432	-2.39656	-2.44416	-2.41171	-2.19902	-2.55809	-2.28045	-2.11938	-1.565	-1.64794	-1.75314	-2.0152	-1.70164	-2.14579	-2.12461	-1.77994	-1.68725	-1.71163	-1.71681	-1.57763	-1.38658	-1.65972	-1.5499	-1.80027	-1.44453	-2.07801	-1.67918	-2.07183	-1.70184	-1.6562	-1.92055	-1.75441	-1.77019	-1.56199	-1.72557	-2.30638	-1.70815	-1.61217
YHR198C	0.88056	1.22605	0.97489	1.26824	1.12732	1.25995	1.41175	1.72707	1.44105	1.48989	1.4546	1.43373	1.20369	1.32436	1.22346	1.67531	1.24261	1.55955	0.93112	0.64868	1.44406	1.87464	1.8352	0.90862	1.08132	1.21689	1.86947	1.65311	0.90141	0.53145	1.72514	1.00698	1.37036	0.26758	1.03564	0.7127	1.65699	1.22562	1.44752	0.82956	1.46769	1.88665	0.98088	1.09654	1.1922	0.5111	1.53165	2.00283	1.01651
YOR076C	-0.66021	-0.49888	-0.55546	-0.61398	-0.58375	-0.51575	-0.66585	-0.53784	-0.64337	-0.59055	-0.56503	-0.3817	-0.66466	-0.55346	-0.53367	-0.47627	-0.93651	-0.4938	-0.58874	-0.26255	-0.30221	-0.81657	-1.03439	-0.31961	-0.84322	-0.66219	-0.61359	-0.77685	-0.14948	-0.61727	-0.60382	-0.66747	-0.33156	-0.99178	-0.44441	-0.36344	-0.3036	-0.28044	-1.05653	-0.46541	-0.69025	-1.04425	-0.74022	-0.6479	-0.15158	-0.28916	-0.63412	-0.44328	-0.52883
YGL015C	-4.20254	-4.11955	-4.01895	-4.30864	-3.85527	-3.93157	-3.63947	-4.61554	-4.53003	-4.08391	-4.54143	-4.3931	-4.10935	-3.83965	-4.14318	-4.50899	-2.06163	-4.05447	-3.09564	-3.07657	-3.55375	-3.20895	-3.61708	-3.27942	-3.58592	-3.51606	-3.86698	-3.73007	-3.56611	-4.01223	-3.70609	-3.6344	-3.48377	-4.05495	-3.91267	-3.27528	-3.87001	-3.92573	-3.61962	-3.56966	-3.42264	-3.21736	-3.41423	-3.8339	-3.71487	-3.78327	-2.42968	-4.13907	-3.67325
YNL219C	1.76052	1.71327	1.58053	1.89232	1.73329	1.4998	2.11172	2.00483	2.16224	2.1546	2.13599	2.15658	2.59496	2.43854	2.28856	2.35794	2.56908	2.35498	1.87612	1.69844	1.62225	2.08263	2.3184	1.57473	1.95139	2.2037	1.72792	2.36478	1.84574	2.27191	2.15169	1.69373	1.65076	1.16744	2.114	2.23622	2.01601	1.60808	2.33989	1.66098	1.98757	2.37625	2.06312	1.94116	1.63811	1.95655	1.89787	1.93908	1.64229
YLR210W	-1.8381	-1.74553	-1.55573	-1.57065	-1.73186	-1.56975	-1.91266	-1.89555	-1.96833	-1.89125	-1.98459	-1.67928	-1.59158	-1.57913	-1.62378	-1.67161	-1.82917	-1.73163	-1.4339	-1.52529	-1.62325	-1.87392	-2.00342	-1.39808	-1.86365	-2.06095	-1.94021	-1.88119	-1.34893	-1.62782	-2.27673	-1.70382	-1.44777	-1.48876	-1.56912	-1.64861	-1.43782	-1.52512	-1.85337	-1.42613	-1.72245	-1.66313	-1.64878	-1.53394	-1.59522	-1.51867	-1.65287	-1.69367	-1.64103
YIL034C	3.17933	3.27574	3.16015	3.08408	3.07295	3.2748	3.39563	3.5094	3.26829	3.40443	3.41142	3.24993	3.52645	3.461	3.72029	3.65121	3.67822	3.46909	3.48323	3.26307	3.5854	3.65961	3.33222	2.80237	3.51944	3.91601	3.89094	3.60049	3.45395	3.44466	3.95158	2.94471	2.98774	2.45681	3.34401	3.18242	3.71315	3.60526	3.4229	3.27123	3.33818	4.124	3.58604	3.56727	3.5395	3.28065	3.60389	3.81364	3.57903
YLR148W	-0.59274	-0.46075	-0.54868	-0.50095	-0.78361	-0.34139	-0.80245	-0.7525	-0.64496	-0.77377	-0.76674	-1.07158	-0.73944	-0.77857	-0.57186	-0.84643	-0.76114	-0.71524	-1.48759	-0.62519	-0.59866	-0.98732	-1.66463	-0.89309	-1.20904	-1.05295	-1.11417	-1.10309	-0.66976	-0.70775	-1.32415	-1.33582	-1.08484	-1.7003	-1.19374	-0.82345	-0.93611	-0.57452	-1.30574	-0.82872	-0.76211	-0.99691	-1.13001	-1.28046	-0.58103	-0.53569	-0.75562	-0.49094	-0.76077
YOR342C	-0.14033	-0.06946	-0.27837	-0.6531	-0.00837	-0.07222	0.13044	-0.08739	0.17733	0.12994	0.28623	0.17793	1.57381	1.01463	0.99608	1.14142	0.98918	1.11071	0.35291	0.0619	-0.2309	-0.42715	1.02683	2.22192	-0.0742	-0.33692	-0.00041	-0.39956	-0.32668	0.06484	-0.04223	0.13674	0.96402	0.26381	0.21753	0.82287	0.32236	-0.33585	0.22102	0.85468	0.40548	0.42901	0.18567	0.58505	0.42504	-0.12549	0.49562	-0.41013	0.94755
YOL070C	-0.11798	-0.15392	-0.1587	-0.416	-0.39571	-0.46763	-0.6442	-0.63194	-0.52514	-0.41264	-0.41457	-0.3086	-0.09496	-0.37939	-0.38091	-0.39202	-0.28261	-0.3149	-0.40847	-0.19348	-0.15677	-0.21576	-0.56626	0.0121	-0.30227	-0.13376	-0.32783	-0.69148	0.39755	-0.22714	-0.70974	-0.48808	-0.32234	0.08763	-0.19158	-0.09971	-0.32292	-0.06199	-0.21102	0.08689	-0.63069	-0.69946	-0.21408	0.17601	-0.47907	-0.18633	-0.16542	-1.23238	-0.37171
YDL160C	3.27804	3.27926	2.96756	3.0868	2.87205	3.19754	2.80422	2.89543	2.98056	2.94134	2.82868	2.67784	3.36243	3.0874	3.08401	3.16607	3.28994	3.00329	2.34582	2.61138	2.9887	3.26261	2.3776	2.14385	3.48933	3.31563	3.52614	3.33501	3.05662	3.38346	2.89262	2.01108	2.09642	0.95374	2.74863	2.67333	3.26877	3.41313	2.53544	2.50627	3.51709	3.83247	3.26608	2.92309	3.35654	3.32155	3.68267	3.76857	3.25452
YIL043C	2.24134	2.47808	2.45513	2.48966	2.63621	2.20008	2.59293	2.51895	2.38707	2.41351	2.69133	2.65786	3.27371	3.07687	2.98055	3.36524	3.33707	3.53952	3.07109	2.69313	2.7817	2.82123	3.05389	3.00195	2.88417	2.63765	2.31606	2.3619	2.51705	2.52404	2.66321	2.62453	2.69563	3.095	2.79181	2.6964	2.82964	2.49296	2.92315	2.65663	2.90049	2.86926	2.54818	2.65109	2.4259	2.31891	2.88097	2.56803	2.66569
YLR124W	-3.51924	-2.78865	-2.90506	-2.79714	-2.83835	-3.09946	-3.70943	-3.90623	-3.53175	-3.94558	-3.06431	-3.53217	-3.21218	-3.27885	-3.76	-2.74852	-3.74287	-2.76404	-2.82644	-2.79555	-4.17802	-3.67212	-3.1559	-3.31243	-3.62133	-3.41981	-3.41573	-3.4706	-3.1789	-3.21275	-3.17295	-2.7919	-2.72875	-2.56102	-2.16491	-2.48985	-3.62187	-3.55338	-2.76618	-3.40358	-3.94512	-3.09493	-3.53221	-3.69919	-3.72996	-3.4112	-4.07278	-3.42465	-3.1948
YGR231C	2.19521	2.38173	2.21429	2.41327	2.58658	2.5652	2.47439	2.58582	2.53098	2.64226	2.64703	2.45342	2.7169	2.59077	2.67487	2.62686	2.617	2.9928	1.82203	2.57266	2.38541	2.22139	2.30313	2.32654	2.08257	2.16337	2.05298	2.08902	1.91552	2.5395	2.28005	2.74618	1.93758	2.47087	2.42383	2.42018	2.19702	2.20185	2.22429	2.70482	2.21171	2.04241	2.0083	2.20309	2.4703	2.57177	2.59664	2.31851	2.64395
YPR202W	1.65263	0.87958	1.67732	1.74598	1.9509	1.40861	0.89004	0.9743	1.23412	0.71884	0.98419	0.96807	0.30402	0.65527	0.49846	0.46996	0.53583	0.19255	1.74174	1.96946	0.54127	0.87272	1.57444	1.03022	1.91554	2.12774	0.83907	0.59938	1.55724	1.682	1.3957	0.68263	0.80596	0.49891	1.60425	1.55976	0.82198	0.80013	2.1732	1.73261	1.00739	1.36727	2.26564	1.2562	1.6386	1.99364	1.1136	1.26178	1.19533
YMR266W	1.27138	1.20497	1.12355	1.31758	1.16774	1.29885	0.42307	0.41669	0.70752	0.38025	0.5835	0.52803	-3.9275	-3.94099	-4.70739	-4.62233	-4.01344	-4.26826	1.77561	1.62919	0.69736	1.18308	1.17317	0.59125	1.5363	1.66476	0.6487	0.93119	1.70888	1.88288	1.18747	1.10019	1.21633	1.59052	1.38525	1.33168	1.566	1.57166	1.82195	1.22139	1.12728	1.51144	1.26809	0.78709	0.71434	1.49885	0.40637	0.66995	0.54743
YNL021W	0.11252	0.30549	0.20444	0.38666	0.46842	0.4227	-0.11294	0.08709	-0.08938	0.00015	-0.10225	0.08749	-0.02148	0.33492	0.19288	-0.2446	0.18105	-0.20558	-0.13999	0.30541	0.04931	-0.18918	-0.02348	0.24127	-0.02598	0.01363	0.11412	0.14942	0.02693	0.00761	-0.44251	0.19094	-0.13562	-0.42623	-0.06066	0.00216	-0.0971	0.15796	-0.2091	0.14884	0.10977	-0.0013	0.12064	-0.14801	0.35434	0.33904	0.10799	0.15053	0.22468
YGR034W	3.87957	3.4936	4.14114	3.67886	3.86162	3.55818	5.02298	4.30727	4.97949	4.41922	4.85985	4.24605	5.33357	5.19731	5.35126	5.0305	5.40402	5.18347	4.26917	3.73103	3.79628	3.98648	3.91429	4.3927	4.13713	3.74327	4.55881	3.76105	4.55217	4.10393	4.92758	4.04853	3.48793	4.30165	4.3488	4.1763	3.98259	3.94304	4.16741	4.37492	4.57695	4.20883	4.65377	3.87683	4.29375	3.95905	4.80337	4.15139	4.43413
YPL107W	-1.10006	-0.75226	-0.78105	-0.92876	-0.47426	-1.00321	-0.54662	-0.5905	-0.44829	-0.30857	-0.34319	-0.34843	-0.693	-1.1916	-1.05672	-0.79066	-1.01745	-0.92465	-1.31529	-0.59817	-0.30559	-0.62063	-1.14326	-0.2802	-0.56134	-0.29732	-0.46758	-0.46804	-0.54588	0.11072	-0.49334	-0.21929	-0.68303	-0.07535	-0.97485	-0.46895	-0.93517	-0.4102	-1.08124	-0.39624	-0.48854	-1.10476	-0.654	-1.1125	-0.56258	0.36956	-1.00702	-1.16607	-0.47602
YGR088W	1.3316	1.86842	1.92888	1.89291	1.47085	1.50133	4.87513	5.16393	4.14965	5.114	4.0167	4.97239	2.17339	2.82156	2.83602	3.72273	2.45654	3.02849	2.62122	2.34744	4.47957	4.48664	4.00131	1.85288	3.82863	3.67307	5.9766	5.73089	3.99605	3.00693	4.28471	3.44472	3.50791	2.93624	1.72032	1.82854	3.94399	3.64846	3.41813	2.40063	4.77873	4.81405	4.05458	2.78799	5.02514	3.52728	4.40183	6.37369	5.11949
YHR173C	-4.18757	-4.14914	-4.16283	-4.54799	-4.63678	-3.62051	-4.27158	-3.85969	-4.55327	-4.24472	-4.43266	-4.11793	-4.198	-4.41524	-4.48681	-4.80764	-4.57108	-4.32705	-3.85353	-3.64639	-3.62577	-3.82661	-3.98704	-3.8709	-3.50901	-3.24141	-3.80905	-3.61547	-3.51166	-3.58144	-3.68254	-3.21819	-3.67475	-3.47577	-3.60207	-3.75599	-3.67216	-3.29167	-3.38844	-3.09713	-3.65541	-3.36817	-3.57865	-4.04672	-3.73089	-3.53939	-3.66171	-3.33712	-3.96353
YCR063W	0.15629	-0.07077	-0.13504	-0.11453	0.27017	-0.08225	-0.55575	-0.17566	-0.4366	-0.57698	-0.16344	-0.1687	0.3323	0.59158	0.33876	0.20627	0.43631	-0.06024	0.53392	-0.38003	0.38612	-0.46387	0.16138	0.64106	-0.1617	-0.52368	0.2474	-0.47663	-0.38243	-0.08761	-0.06815	-0.04174	0.53106	1.05445	0.01921	-0.25845	-0.06782	0.11117	-0.20779	0.46253	-0.05322	-0.09984	-0.12536	0.79652	-0.49071	-0.2765	0.0794	-0.67499	0.35402
YHR073W-A	1.37759	1.15093	1.43046	0.72662	1.00461	1.36299	1.29339	1.17722	1.27395	1.32261	1.14355	1.30162	1.33224	1.55772	1.58998	1.30509	1.32531	1.55949	1.63637	1.92984	1.47127	1.24535	1.29124	1.82104	0.98507	1.41319	1.05863	1.13321	1.67183	1.01936	1.25124	1.21272	1.21283	1.39156	1.41704	1.36008	1.17998	1.42612	1.33596	1.4162	1.27227	1.17657	1.35465	1.19994	1.38056	1.07516	1.17799	1.14387	1.32048
YDL048C	0.99702	1.29106	1.29093	1.21531	0.92011	0.99673	1.62664	1.3757	1.07629	1.5326	1.09556	1.41277	1.40245	1.18385	1.19789	1.25961	0.76099	0.78894	1.54351	0.88291	1.95506	1.87464	1.78582	1.4209	2.86499	2.7001	2.75074	3.13308	1.0954	1.33212	1.98889	2.151	0.56091	0.87854	1.08618	0.93321	2.55509	2.01674	2.02351	1.97202	2.43173	2.13413	2.34035	1.99188	1.80905	0.52681	2.27025	2.52152	1.27738
YML092C	3.17944	3.11552	3.25405	3.22088	3.13792	3.22262	3.44887	3.30932	3.22003	3.40408	3.33774	3.25773	3.58257	3.80378	3.89343	3.38971	3.64343	3.8512	3.18392	3.11708	3.17576	3.23644	2.95637	3.13828	3.00166	2.96699	3.13464	2.8487	3.05462	3.13392	3.14321	3.252	3.20504	3.42688	3.31268	3.22505	3.33029	2.98943	3.15478	3.225	3.25662	3.37197	3.08684	2.96423	3.35025	3.21269	3.22601	3.47594	3.33224
YPR097W	0.35709	0.33551	0.26341	0.24663	0.36243	0.43295	0.03905	0.1005	0.11584	0.06944	0.0487	0.05809	0.03962	0.07428	0.2036	0.09807	0.11286	0.12621	-0.20239	0.36081	0.03817	0.11411	-0.30166	-0.01044	-0.0168	0.10291	-0.32088	-0.22927	-0.052	-0.03843	-0.22232	-0.0287	0.0461	0.0034	-0.01406	0.03512	0.04921	0.33264	0.00811	0.17888	0.22501	0.05182	-0.27265	0.0811	0.00992	0.24956	0.03649	0.26805	0.00223
YBR201C-A	0.36297	0.46361	0.39904	0.44455	0.28291	0.01975	-2.12121	-1.75096	-1.52969	-1.35578	-1.93555	-1.67559	-2.14922	-1.99747	-2.34437	-1.81824	-2.17583	-2.09783	0.77272	0.06625	-1.41939	-0.98047	0.23092	-1.08099	0.14243	0.17928	-0.76116	-0.26388	-0.32765	-0.49476	0.54571	0.23966	0.18086	0.41463	-0.08328	-0.39204	-0.89882	-1.02212	-0.77043	-0.91459	-0.28371	-0.0629	0.44535	-0.81181	-1.22922	-0.87081	-0.52158	0.0875	-0.74826
YNL056W	0.7508	0.84984	0.74414	0.49543	0.826	0.72942	0.82651	0.97545	0.96726	0.98988	0.94243	0.52975	0.61104	0.45952	0.62831	0.35854	0.42563	0.44681	0.50144	1.01335	0.46483	0.55638	0.302	1.13683	1.0351	1.07015	0.36832	0.71101	0.62152	0.71395	0.75376	0.67529	0.70839	0.78035	0.84074	0.90974	0.47963	1.03844	0.95977	1.38001	0.67545	-0.00373	0.68496	0.61555	0.94362	0.79517	1.0246	0.21866	0.64776
YDL025C	1.08281	0.97967	1.06944	1.36486	0.99697	1.08299	1.23056	1.29455	1.15056	1.26254	1.17394	1.10178	0.42428	0.39535	0.47211	0.51861	0.6551	0.32785	1.41655	1.39295	1.25977	1.32409	0.94803	0.38067	1.15305	1.12857	1.24868	1.42145	0.98122	0.98164	1.5825	1.27966	1.13815	1.08758	1.2543	1.14688	1.21735	1.25114	0.93526	0.81436	1.15745	1.18826	0.93748	0.68344	1.36573	0.9395	1.0949	1.87548	1.1372
YAL020C	-0.08102	-0.18212	-0.39803	-0.38495	-0.14608	-0.51092	0.11797	-0.11426	-0.21682	-0.37088	0.08706	-0.03002	0.00449	-0.28156	-0.17678	-0.18967	-0.28694	-0.38246	-0.26533	-0.89078	-0.47591	-0.01977	0.41489	-0.69693	0.29144	0.47305	-0.4359	0.04571	-0.57902	0.04107	0.16148	0.01582	-0.27437	0.45658	-0.25901	-0.53964	0.16486	-0.2049	0.5355	-0.16896	-0.30574	0.28292	0.17592	0.47798	-0.88482	-0.22203	0.13878	-0.11155	-0.48826
YDL243C	-0.1729	-0.35062	-0.05279	-0.15144	0.22429	-0.17533	0.81387	0.63126	0.52114	1.02782	0.76853	0.19456	0.18332	0.24038	0.38743	0.85122	0.09112	-0.03607	1.24107	2.04423	-0.37918	0.28297	0.40516	0.805	-0.56218	-0.74524	0.09202	0.05007	-0.17282	-0.06963	1.54512	1.17339	0.13981	0.4465	-0.12367	-0.40618	-0.36067	-0.48879	0.51188	0.58533	-0.27259	0.08207	0.85709	0.12277	-0.72241	-0.66452	0.02794	1.11515	-0.54653
YFL017C	0.65621	0.56743	0.70011	0.73334	0.02186	0.184	0.63063	0.44646	0.55156	0.3445	0.41974	0.25074	1.09887	0.69995	1.08074	0.44542	0.6595	0.54707	-0.52344	0.2578	0.6841	0.80718	0.32488	0.35615	0.44784	0.78604	0.86852	1.31139	0.1427	0.84587	0.42362	-0.36999	-0.51783	-0.66511	-0.20887	-0.11088	0.2829	0.20725	0.68332	0.93922	0.86457	0.41786	-0.05642	0.04474	0.60687	0.6378	0.49587	0.43029	0.74539
YGL197W	1.65382	1.3806	1.72893	1.28187	1.63315	1.82128	2.04326	2.1999	1.86982	2.01126	2.07023	2.10357	1.77645	1.99085	2.01856	1.78192	2.11069	2.13776	2.12215	2.14088	2.25179	2.4033	1.88783	1.79536	1.90863	1.84924	1.80118	1.52767	1.76662	1.40133	1.6638	1.61923	1.73333	1.47947	1.8363	1.93619	2.15451	2.04233	2.00097	1.97052	2.01918	2.04241	1.69118	1.79673	2.05802	1.65283	1.96685	1.8432	1.87707
YHR092C	-1.01468	-1.25709	-1.29082	-0.96546	-0.71184	-1.45187	-0.86395	-0.72814	-0.93337	-0.89311	-0.82851	-1.16465	-0.73586	-1.33564	-1.66035	-0.77148	-1.0914	-1.12059	-1.21906	-1.4136	-0.73915	0.27953	0.04992	0.33821	-0.02016	-0.21669	-0.50975	0.36825	-1.97899	-0.95034	-1.21803	-0.72444	-1.75287	-1.05872	-1.16676	-0.75508	-0.87363	-0.69503	0.09959	0.06218	-0.94636	0.60578	-0.90683	-1.10897	-0.80662	-0.74243	-0.49961	0.00268	-1.13733
YLL011W	-1.2906	-1.29641	-1.05523	-1.25332	-0.89528	-0.94471	-0.81593	-1.18399	-0.95827	-0.87601	-0.96645	-0.87721	-0.33758	-0.31394	-0.19117	-0.17116	-0.39903	-0.39104	-1.15379	-1.33275	-1.36786	-1.47303	-1.0197	-0.39029	-1.41244	-1.71924	-1.39842	-1.5284	-1.57512	-0.66673	-1.22983	-0.59125	-1.13222	-0.39973	-0.96275	-0.78339	-1.12024	-1.47847	-0.7013	-0.53528	-1.12355	-0.93559	-1.46868	-0.99571	-1.2779	-0.96881	-1.14351	-1.77491	-0.84097
YDR379C-A	1.12024	-0.3038	1.18806	0.56278	0.24037	0.82488	1.32219	0.81248	0.57861	0.67791	0.46669	0.21676	0.93664	0.91223	1.3654	0.4271	0.52051	0.68803	0.48722	0.75965	1.40167	0.8139	0.41612	0.3738	0.51163	0.98389	1.76934	1.21833	0.33788	0.17163	0.88822	-0.42938	-1.01691	-0.48331	0.85993	0.47228	1.20588	0.00056	0.3732	0.80848	0.903	0.43737	1.24167	-0.86447	1.08939	0.84466	-0.28659	1.38626	1.53542
YNR074C	-0.59786	-0.53702	-0.43459	-0.30786	-0.29668	-0.27362	0.63488	0.75968	0.66465	0.46465	0.80217	0.61097	0.12916	0.36164	0.2242	0.34253	0.41296	0.41168	-0.13095	-0.61629	-0.38723	-0.37663	-0.5633	-0.68298	-0.80153	-0.77246	-0.40313	-1.02338	-0.19493	0.03526	0.01078	-0.31968	-0.36582	-0.61296	-0.18265	-0.37381	-0.95835	-1.38472	-0.98975	-1.38337	-0.82528	-0.8078	0.45918	0.27067	-0.43229	-0.38236	-0.35755	0.65585	-0.59035
YDR113C	-0.82504	-0.54999	-0.6727	-0.91114	-0.79088	-0.82726	-1.01167	-0.97058	-0.91799	-1.06888	-0.88404	-0.88529	-1.0044	-1.42667	-1.25111	-1.23972	-1.42597	-1.39242	-1.13878	-0.39354	-0.72992	-0.37426	-0.82551	-0.39525	-1.1462	-0.5887	-0.73854	-0.67985	-0.09952	-0.72117	-1.01414	-0.92794	-0.95612	-0.4768	-0.95649	-0.56543	-1.2539	-0.32327	-0.62829	-0.22718	-0.66585	-0.73356	-0.73818	-0.74564	-0.60503	-0.69429	-0.81778	-0.9892	-0.82874
YLR189C	-0.47634	-0.67757	-0.69827	-0.68027	-0.52453	-0.60298	-0.09547	0.12875	0.0615	0.08877	0.07402	-0.01572	-0.53482	-0.44606	-0.52229	-0.23788	-0.41852	-0.26019	-0.85498	-0.29518	-0.05402	-0.06169	-0.80773	-0.53199	-0.13741	-0.22815	-0.64109	-0.73249	-1.07766	-1.04012	-0.03776	-0.48397	-0.08485	-0.76509	-0.82129	-0.73775	-0.59131	0.0386	-0.43581	-0.18159	-0.21716	-0.54198	-0.7447	-0.74467	-0.57358	-0.66637	-0.41005	-0.51949	-0.68818
YOL159C	-0.29056	-0.34042	-0.81767	-0.31561	-0.61088	-0.2636	-0.5549	-0.37691	-0.53935	-0.56269	-0.54403	-0.88952	-2.4284	-2.88555	-2.64202	-2.11437	-2.30343	-2.557	-0.02181	0.1011	-0.91243	-0.65871	-1.97475	-1.8758	-1.55734	-1.69122	-2.36939	-1.41198	-1.0289	-1.76241	-0.12301	-0.8861	-0.36066	-0.39504	-0.2098	-0.3281	-0.33332	-0.41324	-2.58349	-2.3818	-0.06115	0.0755	-0.77733	-0.71498	-0.35916	-1.77182	-0.1488	-0.04575	-0.53237
YDL247W	-2.04987	-1.66051	-2.23675	-1.84184	-1.92611	-2.09908	-1.86309	-1.63277	-1.61676	-1.63506	-2.23777	-1.52696	-3.12056	-2.7372	-3.04208	-2.80109	-2.94744	-3.16994	-2.54539	-2.65535	-2.47946	-2.65089	-1.72104	-2.61454	-2.35395	-2.7085	-2.08605	-2.36496	-2.55528	-2.19259	-2.4279	-2.13252	-1.33393	-1.45798	-2.31796	-2.14676	-1.21988	-1.50016	-1.92035	-2.77197	-1.02316	-1.03808	-1.99294	-1.54263	-1.97609	-2.23422	-2.87391	-2.36646	-1.26404
YML032C	1.03992	1.13195	1.04647	0.82209	1.05672	1.11455	0.77728	0.75554	0.72125	0.93331	0.87622	0.91946	0.83605	0.75992	0.90429	1.09936	0.83414	1.10846	0.70591	1.09203	0.45943	0.55591	0.58738	0.62606	0.5156	0.7848	0.46338	0.40767	0.75155	0.76256	0.60906	1.12069	0.85656	0.93952	1.13303	1.32736	0.20039	0.72556	0.86769	0.79628	0.60786	0.7534	0.86118	1.02519	0.67846	0.78202	0.90547	0.82807	0.8533
YFL028C	0.73271	0.78998	0.76603	0.73766	0.83554	0.63271	0.80639	0.93096	0.57807	0.69209	0.63321	0.41601	-0.072	0.40046	0.4206	0.01781	0.48664	0.47394	-0.02074	0.50177	0.24842	0.0127	-0.02629	0.75176	0.49883	0.2956	0.23971	0.36965	0.51273	0.51251	0.53972	0.46393	0.74996	0.02713	0.68361	0.61302	-0.78005	0.32589	0.19352	0.66295	0.33892	0.02623	0.29169	-0.52599	0.64681	0.60797	0.2162	0.66158	0.73974
YBR256C	1.47378	1.43058	1.49908	1.6214	1.84023	1.7987	1.61178	1.67441	1.45425	1.83679	1.66292	1.45966	0.66985	0.84772	0.85199	0.71594	0.83038	0.73577	1.25198	1.9079	1.21979	1.37201	0.98793	1.24648	1.4592	1.60315	0.96087	1.69503	1.11142	1.13741	1.68728	1.20941	0.9932	1.41095	1.3757	1.63358	0.98714	1.30506	1.31585	1.57551	1.53318	1.08695	1.09927	0.85275	1.77636	1.48289	1.72937	2.13707	1.26918
YOR081C	1.15134	1.17174	1.03012	0.96219	0.82578	0.91966	0.20316	0.12593	0.1865	0.05413	0.08613	0.07498	-0.01949	-0.23611	-0.28557	0.02812	-0.05638	0.00314	0.89289	0.36563	0.64335	0.98022	1.19466	0.30324	1.3351	1.28441	1.12462	1.1214	0.66015	1.27247	0.90701	0.67477	1.4841	1.16849	0.59286	0.26689	1.23483	1.02466	1.56358	1.16119	0.63763	1.09215	0.78982	0.62355	1.06445	0.59209	0.54313	0.35763	0.50675
YPL024W	-0.2204	0.01709	0.04472	-0.33238	-0.34342	-0.48809	-0.23736	-0.37006	-0.40546	-0.01088	-0.19061	-0.20441	0.57315	0.2874	0.2242	0.49671	0.27842	0.473	-0.54726	-0.49468	-1.1398	-0.92876	-0.65528	-0.51895	-0.42339	-0.55357	-1.0801	-0.81376	-0.84093	-0.88329	-0.29045	-0.35843	-0.48044	0.46138	-1.40705	-0.74481	-0.97144	-0.50069	-0.52374	-0.39944	-0.39377	-0.55037	-1.0859	-0.76539	-0.46652	-0.91959	-0.43017	-0.1027	-0.6229
YLR442C	-0.79121	-1.02518	-1.05527	-0.91099	-0.7541	-0.79451	-1.03912	-0.82007	-0.86481	-0.83441	-0.73755	-1.06855	-0.92386	-0.97098	-0.91197	-1.16948	-1.11542	-1.30823	-1.5835	-0.81052	-1.08336	-1.00432	-1.32487	-0.77829	-1.18448	-1.08998	-0.99239	-1.2759	-1.30437	-1.31774	-1.1623	-0.99566	-1.22993	-1.57862	-1.03103	-0.76648	-1.12402	-0.70445	-1.05483	-0.66679	-0.87261	-1.06652	-0.8933	-1.02228	-0.88534	-0.80493	-1.09668	-1.15491	-0.924
YMR257C	-0.70894	-0.61799	-1.13026	-0.90353	-0.7208	-0.78954	-0.44677	-0.30382	-0.59872	-0.38959	-0.39696	-0.41352	-0.33389	-0.30999	-0.38584	-0.31125	-0.15657	-0.3555	-0.71731	-0.77625	-0.48134	-0.51924	-0.38981	-0.52206	-0.43136	-1.25922	-0.61029	-0.79809	-1.021	-1.13148	-0.47781	-0.2997	-0.609	-0.67286	-0.89117	-0.84456	-0.34574	-0.70553	-0.60465	-0.60506	-0.34991	-0.11035	-0.74241	-0.87388	-0.84876	-0.98017	-0.78418	-0.29692	-0.87219
YDL219W	0.28151	-0.24962	0.39375	0.14171	0.31827	0.14464	0.63418	0.32125	0.54242	0.06756	0.61739	0.26709	0.10636	0.18363	0.24426	-0.55672	0.25736	-0.31134	0.31013	0.32036	0.29261	0.18503	-0.76014	0.3218	0.01222	0.279	0.15603	0.29749	0.12789	0.32152	0.58679	-0.81758	-0.27052	-2.26586	0.09449	0.23687	0.17985	-0.04974	-0.11068	0.45237	0.02472	-0.03602	0.48871	-0.54538	0.558	0.32342	-0.07302	0.03832	0.74813
YKR040C	-3.97439	-3.46203	-3.6692	-3.78552	-3.54559	-3.99242	-4.21757	-4.31659	-4.1508	-4.58177	-4.26387	-4.475	-4.10821	-3.7298	-4.07951	-4.59732	-4.34993	-3.98671	-3.58968	-3.62173	-3.70957	-3.32664	-3.10635	-3.14238	-3.52796	-3.26729	-3.24228	-3.08642	-3.44126	-3.58268	-3.50968	-3.05339	-3.42173	-3.05884	-3.32253	-3.18098	-3.58748	-3.14719	-3.43883	-3.77562	-3.47276	-3.60831	-3.41558	-3.51631	-3.77893	-3.45362	-3.71515	-3.61402	-3.60157
YKL122C	1.12937	0.90946	1.28557	0.74225	1.03274	0.80163	0.3728	0.75762	0.5912	0.73694	0.99598	0.79438	1.37946	0.75689	1.16286	0.08893	0.44319	0.9631	0.98774	1.54476	1.24545	0.88234	0.74807	1.36891	0.62127	0.99542	1.17497	1.05436	1.13366	0.9145	1.00168	0.22922	0.95673	0.70521	1.01518	1.3292	0.62478	1.41872	0.78777	1.55196	0.74617	0.03335	0.71719	0.67921	1.36691	1.07384	0.87757	0.6663	1.095
YGL240W	-0.55492	-0.39982	-0.28755	-0.37638	-0.36955	-0.63771	-0.98763	-0.63616	-1.11259	-0.59929	-0.73237	-0.53412	-0.44852	-0.12392	-0.24073	-0.2446	-0.04221	-0.2829	-0.53174	-0.77068	-1.0008	-0.72206	-0.27008	-0.76701	-0.6036	-0.93818	-0.38776	-0.80794	-0.79356	-0.61879	-0.47781	-0.09434	-0.29504	-0.01808	-0.5768	-0.61884	-0.73172	-0.80161	-0.31563	-0.80435	-0.49661	-0.42786	-0.47478	-0.23839	-0.9115	-0.71618	-0.50961	-0.58941	-0.61629
YDL080C	0.19127	0.42508	-0.03725	-0.16814	0.11279	0.09445	-0.19573	-0.18269	-0.18284	-0.18979	-0.3289	-0.29992	-0.03802	-0.02625	-0.06877	-0.1967	-0.05196	-0.21398	-0.042	-0.12458	-0.05672	-0.41835	-0.36043	0.31489	-0.30734	-0.60269	-0.46055	-0.3118	-0.09087	-0.25488	-0.62743	-0.15945	0.73819	-0.07404	-0.07993	0.21535	-0.19686	0.03362	-0.38268	0.21093	-0.61775	-0.31915	-0.00565	-0.34398	-0.17031	0.09042	-0.09527	-0.29611	0.176
YEL001C	1.99833	1.15917	1.66084	1.46528	1.28357	1.83237	1.85097	2.07467	1.94668	1.77317	1.81518	1.39495	2.83749	3.10847	2.90886	2.67663	3.18311	2.63839	1.97031	1.91946	1.85695	2.15172	1.94422	1.76246	2.15783	1.82466	1.67116	1.78256	1.02518	1.76301	2.07198	1.27241	1.58992	0.52766	1.3128	1.45579	1.65014	1.73618	1.86971	1.77476	2.15779	1.86046	1.83186	1.67818	1.9299	1.50727	1.93362	2.04654	1.81237
YPR168W	-1.02287	-1.41261	-0.82726	-0.99348	-0.82442	-0.76432	-0.93178	-0.8718	-0.97583	-0.96712	-0.83156	-0.81599	-0.75179	-0.84774	-0.78244	-0.78242	-1.14606	-0.82093	-1.46599	-0.65445	-0.71664	-0.67391	-1.2893	-0.97486	-1.23488	-0.87681	-0.86009	-1.31535	-1.14485	-1.0093	-1.0271	-1.58566	-1.34186	-1.81888	-1.30529	-1.11055	-1.26375	-0.93104	-1.06484	-0.3744	-0.89641	-0.91825	-1.29484	-0.84259	-0.78718	-0.88404	-0.89082	-0.68731	-0.86315
YLR374C	-3.23466	-2.89029	-3.03137	-2.76817	-3.18685	-2.90449	-2.43455	-2.08137	-2.18208	-1.9512	-2.11151	-1.96296	-1.80493	-1.65256	-1.79448	-1.87147	-1.9238	-1.84126	-1.38037	-1.92865	-1.69275	-1.99628	-1.6414	-1.96836	-2.56049	-3.06641	-2.37358	-2.91173	-2.06446	-2.28371	-2.37364	-1.56786	-1.45552	-0.74785	-2.0178	-2.30127	-2.21883	-2.28265	-2.21926	-2.07653	-2.11727	-2.0747	-2.47548	-1.82799	-2.44812	-2.3926	-2.17382	-2.8204	-2.39581
YDL034W	-3.91246	-4.59162	-3.982	-4.73019	-4.00982	-4.78632	-4.59624	-5.07842	-4.28151	-4.82925	-4.06451	-4.00652	-3.88616	-4.79556	-2.43852	-4.77414	-3.85754	-4.45057	-4.29903	-4.16379	-4.00163	-3.75848	-4.08921	-4.05586	-4.34901	-4.17071	-3.58121	-3.8574	-3.5058	-4.37144	-3.96325	-3.6919	-4.29119	-3.4478	-4.03307	-3.97946	-3.82755	-3.75115	-3.71724	-3.881	-3.75039	-4.11075	-3.72477	-3.54187	-3.29479	-4.02218	-4.30384	-3.74673	-3.61538
YHR109W	-1.62585	-1.2813	-1.46082	-1.46961	-1.3634	-1.24184	-1.31582	-1.13227	-1.41522	-1.17478	-1.19131	-1.26808	-0.87664	-0.55494	-0.59096	-0.30088	-0.64288	-0.72277	-1.09989	-1.58532	-1.03532	-1.27256	-1.25436	-1.24649	-1.69934	-1.66878	-0.99859	-1.56981	-1.78402	-1.41262	-1.07707	-0.9124	-1.47149	-1.78395	-1.13917	-1.19047	-1.22815	-1.71228	-1.31703	-1.64925	-1.45286	-1.24233	-1.75863	-1.83897	-1.7637	-1.61341	-1.3695	-1.08672	-1.20682
YPL061W	2.34942	2.21319	2.52264	2.51107	2.44568	1.99211	4.50295	3.96252	4.0803	4.2972	4.47555	4.38352	3.47195	3.42575	3.84551	3.86711	4.03002	3.89783	3.49588	2.78092	2.6737	3.16577	3.12535	2.73075	2.80378	2.42705	3.49082	3.11613	3.40919	2.51096	4.10093	3.36767	3.12481	3.36111	3.54435	3.43424	4.11379	3.44567	3.65937	2.59367	4.03057	4.40896	3.30023	3.61871	2.75168	1.92022	3.83257	2.93282	3.39556
YJL060W	1.71845	1.66394	1.53154	2.00629	1.80256	1.60667	1.91529	1.7707	1.55824	1.90355	1.96932	1.63924	2.06924	2.04198	2.0106	2.09134	2.04105	2.10935	1.89015	1.28523	2.05616	2.06605	2.11013	1.73609	2.07242	1.60896	2.03023	1.59261	1.45552	1.9276	2.17248	1.72945	1.45882	1.08061	1.63353	1.59686	2.15737	1.65232	1.91072	1.74103	1.96183	2.06536	1.54715	1.60362	1.61208	1.98646	2.00141	1.93997	1.81454
YLR240W	0.00651	7e-05	-0.22511	-0.19959	0.12486	0.14737	0.14787	0.39263	0.20504	0.32621	0.29894	0.29206	-0.03547	0.08068	-0.03313	0.09137	0.03201	0.03075	0.28069	0.17587	0.20056	0.02749	0.17102	-0.0618	-0.0865	0.08906	0.07283	-0.06567	-0.05822	0.01799	-0.14984	0.2831	-0.01369	-0.04693	0.51115	0.21649	0.34935	0.03548	0.02097	-0.17381	0.13033	0.01632	-0.16257	-0.01607	0.09496	-0.00887	0.17759	0.20784	0.16541
YDR223W	-3.66601	-2.8776	-3.12963	-3.06098	-3.76094	-3.3193	-3.63563	-3.13337	-3.5934	-3.32569	-3.83497	-3.14748	-2.77125	-2.60343	-2.81998	-2.37281	-2.87383	-2.52401	-3.53265	-3.24651	-2.40004	-2.72256	-3.18971	-2.69689	-2.76402	-2.90126	-2.82992	-2.89087	-3.23001	-3.05758	-3.15859	-2.87425	-2.41672	-1.79099	-3.50066	-3.25028	-2.48688	-2.51666	-2.81632	-2.71287	-3.04195	-3.25287	-3.36556	-3.28006	-2.85782	-2.91367	-3.42917	-2.87555	-3.05237
YPR062W	2.68161	2.82301	3.14933	2.57058	3.03453	2.85602	2.37094	2.44619	2.66946	2.47655	2.39413	2.41059	2.96093	2.84822	2.92647	2.32311	2.61527	2.54942	2.546	2.82305	2.70329	2.47932	2.05729	2.74369	2.72293	2.77087	2.68121	2.5888	2.79386	2.18472	2.62518	2.36641	2.12379	1.57847	2.2748	2.69753	2.18016	2.54019	2.40615	3.00673	2.71352	2.08886	2.68161	1.8404	2.7851	2.66148	3.01876	2.17362	2.73753
YER174C	-0.07529	-0.3053	0.23867	0.09451	0.51355	0.03689	0.24488	0.06082	0.02596	-0.02912	-0.02304	0.41046	0.18561	0.17464	0.17108	1.22203	0.19857	0.10881	0.45755	-0.14459	0.21687	0.45411	0.28016	0.31137	-0.00721	-0.02535	0.74909	0.68254	0.39137	0.5855	0.49465	0.39528	0.27658	0.15783	0.37857	0.21269	0.41209	-0.24525	0.35098	0.27115	0.3181	0.70493	0.294	0.12681	0.41226	0.50031	0.17679	0.22548	0.18058
YGR104C	-0.62281	-0.80755	-0.54092	-0.62899	-1.05927	-0.36968	-0.57339	-0.74519	-0.90654	-0.6583	-0.73387	-1.0871	0.03062	-0.03554	0.18824	-0.38895	-0.54714	-0.11774	-0.66002	-0.45319	-0.45949	-0.72206	-1.19653	-0.54538	-1.00816	-1.34689	-0.85139	-0.90552	-0.52451	-0.5478	-0.921	-0.57717	-0.68303	-0.51662	-0.817	-0.80929	-0.58071	-0.79295	-1.05999	-0.69464	-0.65396	-1.32067	-0.82981	-1.00206	-0.38948	-0.64901	-1.02907	-0.54155	-0.24946
YDR402C	-3.78202	-3.09401	-3.65724	-3.45523	-3.78375	-3.48061	-4.16518	-3.47953	-4.13439	-3.88658	-4.13211	-4.00597	-3.01612	-2.79314	-3.15131	-2.91452	-3.0159	-2.9623	-3.24412	-2.90409	-3.45904	-3.41905	-3.04392	-3.1501	-3.36648	-3.36453	-3.62948	-3.55982	-3.37692	-3.22451	-3.31224	-3.70658	-3.5965	-3.55027	-3.52715	-3.35104	-3.73834	-3.58005	-3.49134	-3.57023	-3.21524	-3.16902	-3.28296	-3.62725	-3.52207	-3.28931	-3.53333	-2.91375	-3.17157
YLR037C	-0.77648	-1.00731	-0.48768	-1.05863	-0.66436	-0.54028	-0.60749	-1.09477	-0.95856	-0.91022	-0.57271	-0.99625	-0.7956	-0.79436	-0.96953	-0.55645	-0.82806	-0.138	-0.74175	-0.67746	-0.82735	-0.64237	-0.17807	-0.82791	-0.07682	-0.60328	-0.42517	-0.39252	-0.70514	-0.19951	-1.0007	-0.17875	-0.83055	0.05911	-1.04033	-0.60334	-0.58636	-1.17832	-0.52606	-0.97361	-0.59719	-0.50643	-0.60406	0.04967	-0.67764	-0.36546	-1.00941	-0.56723	-0.91491
YMR146C	2.52278	2.44201	2.56545	2.43955	2.30893	2.60522	2.53998	2.18583	2.28532	2.44885	2.2525	2.42057	2.79862	2.74306	3.0426	2.95461	2.9537	2.85208	2.78216	2.3738	2.4444	2.30456	2.23788	2.91797	2.19141	2.32879	2.27332	2.09098	2.99976	2.60934	2.20027	2.76037	2.2024	2.54183	2.6823	2.79398	2.55043	2.40836	2.29218	2.97628	2.37707	2.11614	2.56106	2.37139	2.61903	2.69584	2.78625	2.16751	2.91743
YGR241C	1.40482	1.61052	1.50039	1.40129	1.34282	1.68763	1.98916	2.13684	1.9903	2.07298	1.90731	2.12462	2.27127	2.09918	2.06228	2.03128	2.1235	1.88265	1.65875	1.9581	1.69391	1.74373	1.70308	1.53065	1.60891	1.96514	1.59108	1.254	1.55288	1.32803	1.74167	1.78224	1.99579	1.86442	1.68483	1.87315	1.75666	1.83075	2.01912	1.50302	1.53978	1.55617	1.49282	2.02826	1.95967	1.32028	1.48097	1.58637	1.54144
YGL062W	3.6283	3.51617	3.39832	3.39597	3.87097	3.82333	4.42964	4.9012	4.4105	4.58212	4.56529	4.66949	4.42186	4.8817	4.58809	4.1737	4.69482	4.43991	4.20555	4.35443	4.31866	4.12352	4.00482	4.43226	3.87789	3.47677	3.89662	3.69217	3.89375	4.27504	3.97075	4.02212	4.50269	4.73198	4.17697	4.42012	4.51799	4.28674	4.21712	4.38747	3.99386	4.1966	4.06799	4.52079	4.25011	4.40675	4.71932	4.23592	4.34775
YPR057W	-0.61309	-0.12073	-0.48617	-0.38006	-0.23368	-0.4119	-0.90858	-0.66233	-0.65953	-0.43487	-0.60678	-0.57369	-0.50637	-0.79982	-0.70987	-0.5371	-0.78877	-0.45354	-0.81931	-0.51615	-0.6418	-0.45433	-0.46414	-0.31864	-0.35328	-0.4831	-0.74259	-0.57537	-0.28007	-0.55568	-0.44462	0.00556	-0.22474	0.48735	-0.96862	-0.71825	-0.75706	-0.31942	-0.5775	-0.24035	-0.43848	-0.75807	-0.35224	-0.25755	-0.68161	-0.56723	-0.72104	-1.00241	-0.74162
YIL012W	-3.85072	-4.00805	-3.78543	-3.78744	-4.11653	-4.0689	-3.99091	-3.74976	-4.28151	-3.72918	-3.89706	-3.45823	-4.22489	-3.42731	-3.93974	-4.00659	-3.98463	-3.42714	-3.03661	-3.1393	-3.56993	-3.05248	-3.32123	-3.25634	-3.35699	-3.00777	-4.28159	-2.85837	-3.58349	-2.97593	-3.01684	-3.94783	-3.25066	-3.12503	-3.22497	-3.32509	-3.02227	-2.98049	-3.24667	-3.33761	-3.35029	-2.51425	-3.04277	-3.25242	-3.53972	-3.3691	-3.49544	-2.60699	-3.22003
YDR156W	1.72182	1.76631	1.35354	1.87138	1.54059	1.77026	1.60266	1.51157	1.48243	1.66361	1.72814	1.90192	2.48329	1.91405	2.44703	2.60007	2.24544	2.4291	1.84721	1.26311	2.05913	1.7359	2.2277	1.83857	2.4297	2.04515	1.62207	1.81763	2.0103	2.12373	2.16197	1.81737	2.08908	2.10899	1.59864	1.63167	2.16119	1.46751	2.33046	1.90038	1.95132	2.46528	2.05944	2.2111	1.68003	1.97135	2.26707	1.58586	2.05514
YJR113C	0.73233	0.48834	0.72331	0.6592	0.38162	0.41687	0.72746	1.11794	0.72543	0.87046	0.85651	0.92891	0.95665	1.05706	1.03958	1.09794	1.24952	1.26094	1.12157	0.5268	0.79876	0.99049	1.27222	0.60074	0.26308	0.30534	1.3488	1.56681	0.55113	0.84727	1.14976	0.66616	0.64115	0.67317	0.94891	0.31272	1.08525	0.77211	0.70538	0.52094	0.75815	1.20948	0.63253	1.24302	0.75038	0.16957	1.09502	0.52392	1.0542
YPR131C	-0.1518	-0.1527	0.19006	-0.11797	-0.22158	-0.02974	-0.11651	0.03806	-0.06374	-0.06996	-0.12984	-0.27853	0.23309	0.34719	0.33486	0.25664	0.5186	0.13826	-0.05159	-0.28065	0.30734	-0.21118	-0.44945	0.09179	-0.15672	-0.10318	0.06602	0.12043	0.4942	-0.61725	-0.15173	-0.27814	-0.00437	-0.59481	0.04336	-0.12497	0.10231	0.19389	-0.31484	0.15651	-0.19473	-0.5752	-0.37429	-0.1408	0.23102	-0.26243	0.07199	-0.11211	0.31195
YLR416C	-3.90544	-3.15929	-3.21715	-3.16276	-3.6284	-3.3414	-2.9672	-3.27585	-3.72699	-3.21204	-3.39589	-3.2156	-3.425	-3.74762	-3.90767	-3.63683	-4.03458	-3.92577	-2.71443	-2.89628	-2.53827	-2.64561	-2.303	-3.07823	-2.50586	-2.7166	-2.9222	-3.07311	-3.19404	-3.17364	-3.03439	-2.28711	-2.70475	-2.20753	-3.04325	-3.08146	-2.09043	-2.6386	-2.62046	-3.23415	-2.76866	-2.68834	-2.75835	-1.84216	-2.67657	-3.15207	-3.09969	-2.68687	-2.98204
YLR029C	3.76279	3.22142	3.84787	3.64161	3.69761	3.70984	4.99199	4.6369	5.11131	4.62752	4.84807	4.82157	5.29519	5.19718	5.3433	4.98437	5.3977	4.76538	4.47132	4.37008	4.45664	4.02391	4.07516	4.70437	4.00467	3.85007	3.97942	4.00565	4.18179	4.05378	5.16521	3.74878	4.11793	3.41593	4.59834	4.51802	4.22722	4.22391	4.34744	4.59902	4.05937	4.08454	4.12512	3.61513	4.27208	4.21227	4.74548	3.74029	4.61784
YMR155W	-0.22538	-0.56063	-0.56788	-0.23541	-0.29452	-0.4612	0.01779	-0.04507	-0.20881	-0.06279	-0.19229	-0.37065	-0.14195	-0.09247	-0.16682	-0.01824	0.20577	-0.05832	-0.57684	-0.6231	-0.10872	0.51597	0.3475	-0.89129	0.50122	0.43942	0.22246	0.79339	-0.53841	-0.38118	0.32353	-0.33661	-0.3966	-0.30463	-0.62074	-0.8555	-0.20498	-0.11385	0.20881	-0.85384	0.07346	0.55024	-0.08104	0.10343	-0.44545	-0.52982	-0.1106	0.19971	-0.67239
YNL180C	1.79227	1.25863	1.66606	1.1242	1.00942	1.85267	1.09659	1.37881	1.3463	1.56029	1.35023	1.6185	1.42642	0.9613	1.1406	0.37989	0.78535	0.70769	1.5999	2.77755	1.72528	1.41478	1.19699	1.79559	2.06929	2.77006	1.11915	1.11588	2.59869	1.44054	1.98168	1.30467	2.05121	0.82024	1.80877	2.40645	2.05598	3.30755	1.72126	2.1971	2.55291	1.70259	2.08866	1.22506	2.48435	1.63738	0.87336	1.0452	1.33254
YIL080W	0.5698	-0.16056	0.46461	-0.26873	-0.61646	0.22087	-1.44847	-1.03881	-0.92926	-0.99555	-1.82168	-1.22865	2.06214	1.98265	1.85381	1.18308	1.46223	1.22252	2.62112	3.03648	1.23425	0.5508	-1.22263	-0.05762	-0.73084	-0.71871	-4.66697	-4.01808	1.52179	0.52525	-1.40831	-0.49508	-0.68303	-0.85539	0.30272	0.71355	-0.63011	-0.11585	0.96513	1.5287	-0.68579	-0.53195	-0.3052	-0.20552	0.59223	0.20929	-1.55097	-0.19032	-0.51159
YGR164W	-4.2742	-3.80134	-4.08885	-4.11288	-4.00124	-4.69591	-4.21536	-3.78414	-4.472	-4.18485	-4.83257	-3.95811	-3.62984	-4.20791	-4.15538	-3.80336	-3.34961	-3.66	-3.53891	-3.32151	-3.31387	-3.05797	-3.06355	-2.91819	-3.50337	-3.25826	-3.37017	-1.86817	-3.89976	-2.95789	-3.38911	-4.19826	-2.27062	-3.37194	-3.90552	-3.44584	-3.58376	-3.87209	-3.37156	-3.19015	-3.57568	-3.61421	-3.23223	-2.9453	-3.39798	-3.71839	-3.5299	-3.50977	-3.13124
YOL106W	-0.26202	-2.18987	-1.68564	-2.32382	-0.95706	-0.67524	-0.9573	-1.65145	-1.34851	-1.61117	-1.70664	-2.39127	-0.46093	-0.69271	-0.42318	-0.54679	-0.32303	-0.94939	-3.72241	-2.71026	-3.42719	-2.76776	-2.00532	-2.93781	-2.69428	-2.88757	-2.52041	-1.32314	-3.0705	-1.7548	-1.52457	-3.80204	-4.00922	-3.98366	-2.85445	-2.02428	-3.77824	-4.00933	-2.87146	-2.97995	-1.39117	-1.17686	-2.28359	-3.65549	-0.51843	-1.7819	-2.62314	-0.44918	-2.25118
YIL140W	-0.74457	-0.89244	-0.94137	-0.66811	-0.69839	-1.02936	-0.82145	-1.11427	-1.09908	-0.98118	-0.96827	-0.90017	0.18425	-0.03891	-0.09072	0.23188	-0.0473	-0.05718	-0.05576	-0.70572	-0.57915	-0.21041	0.24297	0.10212	-0.39267	-0.55108	-0.71672	-0.88347	-0.23382	0.07182	-0.65719	-0.9472	-1.15352	-0.4702	-0.73549	-0.59474	-0.42009	-0.73444	0.33326	0.349	-1.24184	-0.74015	-0.81412	-0.44948	-1.45565	-0.56417	-1.47996	-1.61392	-0.92807
YIL171W-A	-4.35045	-5.07338	-4.29045	-4.53545	-4.26878	-4.65305	-4.89641	-4.80559	-4.33185	-4.57569	-4.69753	-4.298	-4.19013	-5.1549	-3.9997	-4.69466	-4.53099	-4.62126	-3.7091	-3.67515	-3.7045	-3.45907	-3.84166	-3.26658	-3.19345	-3.34228	-3.88903	-4.50617	-3.55179	-3.95507	-3.89868	-4.13085	-4.14818	-4.37922	-3.82582	-3.35561	-2.97453	-3.18234	-3.41769	-3.8954	-4.15157	-3.47546	-4.08467	-4.39617	-3.52327	-3.91061	-3.67875	-3.2436	-4.15608
YDR272W	1.40988	1.37793	1.67849	1.44845	1.66132	1.51804	0.93322	1.29828	0.93939	1.05058	1.173	1.02242	0.57143	0.5135	0.6456	0.71437	0.6786	1.04897	0.43094	1.17655	1.51616	1.71081	0.83067	1.31236	1.15128	1.22986	1.40409	1.18407	1.39271	0.97966	0.81138	0.95155	1.42477	0.99004	0.71354	1.03086	0.4933	1.61982	0.76682	1.31221	1.36268	0.56424	0.59316	1.28356	1.52471	1.10111	1.97667	1.15267	1.25173
YDR114C	-4.93115	-3.98607	-5.24074	-4.47163	-5.09454	-5.27658	-5.47275	-5.25382	-4.37171	-4.7336	-4.53977	-5.00108	-5.15593	-4.60772	-4.73662	-5.26401	-4.64083	-4.43745	-4.44987	-3.93996	-3.90812	-3.47752	-4.21232	-3.67217	-3.59046	-4.04809	-4.34857	-3.37029	-4.14169	-4.49038	-3.09825	-3.80204	-3.64899	-4.36821	-3.91916	-4.18804	-4.43356	-3.89821	-4.87492	-4.39642	-4.15157	-3.88916	-3.83215	-4.03664	-4.11926	-4.57077	-3.81981	-4.16057	-4.36685
YOR238W	-0.53434	-0.46068	-0.53374	-0.80366	-0.6733	-0.57499	-0.68634	-0.77599	-0.64893	-0.65146	-0.56729	-0.58952	-0.44175	-0.51653	-0.1939	-0.58424	-0.56451	-0.52806	-0.21546	-0.242	-0.54465	-0.63755	-1.03005	-0.56344	-0.8473	-0.85853	-1.16634	-0.80419	-0.2582	-0.60037	-0.76332	-0.74982	-0.3966	-1.38602	-0.47101	-0.22438	-0.6183	-0.64299	-0.97604	-0.45517	-0.79907	-1.18489	-0.76143	-0.53541	-0.28343	-0.29821	-0.73539	-0.66443	-0.14035
YKL142W	2.83762	2.89906	2.86623	2.83742	2.77524	2.89206	2.91474	3.39227	3.29915	3.54808	3.3263	3.09702	3.06111	3.10357	3.25247	2.82063	3.18128	3.30981	2.48077	3.15168	3.18914	2.74777	1.95341	2.91028	2.91214	2.88108	2.80465	3.03505	2.69213	2.93134	2.76523	2.41368	2.81513	2.80162	2.51474	2.70351	2.60145	3.75035	2.15174	3.06543	3.15986	2.0654	2.67254	2.08279	3.68137	3.3965	3.64592	3.148	3.35178
YLR139C	0.55286	0.77822	0.4557	0.38561	0.42801	0.54675	1.24043	1.08742	0.54957	1.18398	1.11957	1.11696	1.35392	1.22837	1.44371	1.35648	1.51534	1.42622	0.52736	0.16396	0.60624	0.83073	1.21415	1.07161	1.20628	0.79479	1.27433	0.55979	0.46173	0.86793	1.17431	0.70214	0.91145	1.0447	0.59739	0.24103	0.97833	0.76518	1.03658	0.63693	0.96395	1.27233	1.03484	1.09364	0.76476	0.52273	1.00304	0.94332	0.54999
YNR044W	-0.38671	-0.43555	-1.07077	-0.88062	-1.04532	-0.95357	0.38298	0.11886	0.26301	0.45584	0.44095	0.14874	0.57637	0.23893	0.03997	0.04021	0.14688	0.21627	1.76631	1.41873	0.61939	1.54613	0.55757	0.0421	0.55208	0.41982	-0.24506	0.19553	1.36884	0.32317	0.38313	-0.17042	0.62978	0.44893	-0.60144	-0.43654	0.45738	0.07875	1.10667	0.16712	0.05745	0.36701	0.15964	1.01611	-0.56659	-0.39682	-0.22841	-0.1381	-0.4265
YPR009W	-0.46631	-0.5733	-0.46738	-0.63673	-0.48835	-0.33923	-0.18631	-0.39976	-0.25401	-0.15946	-0.01908	0.04739	-0.96397	-0.87107	-0.76983	-1.09996	-0.98068	-1.09525	0.06156	-0.41366	-0.74158	-0.69268	-0.25771	-0.55263	-0.12722	-0.06271	-1.02201	-1.00624	-0.53101	-0.62683	-0.0897	0.09728	0.0351	-0.34905	-0.13972	-0.34976	-0.07637	-0.49621	0.08326	-0.5054	-0.78419	-0.8015	-0.4094	-1.14358	-0.27026	-0.49489	-0.7696	-0.62385	-0.54025
YHR032W	0.13097	0.24118	-0.31198	-0.02575	0.13305	-0.11183	0.53724	0.30907	0.56455	0.31102	0.52489	0.49673	1.14622	0.99134	0.90629	1.26995	1.03853	1.09098	0.22035	-0.12728	0.27325	0.47167	0.63581	0.28866	0.45153	-0.12527	0.5599	0.30268	-0.07151	0.1335	0.06381	0.43606	0.52803	1.12771	0.01527	-0.11965	0.40454	0.15923	0.36504	0.08057	0.4924	1.16161	0.13956	0.97038	0.04238	0.28807	0.57707	0.11706	0.14223
YDR429C	1.78046	1.45044	1.79139	1.80644	1.69062	1.7031	1.47646	1.27151	1.71572	1.47635	1.62967	1.48497	2.06075	1.50027	1.87961	1.67662	1.72959	1.73534	1.26336	1.70464	1.51634	1.32017	1.31098	2.31322	1.44842	1.42278	1.36056	1.40391	1.8192	1.65791	1.57077	1.20405	1.03763	0.88818	1.6636	1.97242	1.15906	1.6775	1.38788	2.36656	1.60357	1.31013	1.58327	1.22558	1.80928	1.76053	1.82278	1.21278	1.7658
YNR031C	0.23701	0.29438	0.26027	0.09568	0.24664	0.43835	-0.11086	0.13243	0.1178	-0.16582	-0.14163	-0.02497	0.09865	0.17551	0.18353	0.25102	0.26303	0.31328	-0.17732	0.34044	-0.07664	-0.08529	-0.14766	0.06307	-0.10609	0.11047	-0.39729	-0.28016	-0.18209	-0.16004	-0.47341	0.26108	0.03853	0.27136	-0.07253	0.17637	-0.31796	-0.06558	0.16493	0.24375	-0.20075	-0.13815	-0.44208	-0.07431	-0.24115	0.09836	0.01783	0.04686	-0.00892
YGL079W	-0.26855	-0.08768	-0.28573	-0.37878	0.11351	-0.06516	-0.01036	-0.13202	-0.19987	-0.09245	-0.04856	0.35334	-0.13633	-0.31504	-0.12986	0.11186	-0.33248	-0.38868	0.06462	-0.48194	0.33131	-0.08529	-0.13742	0.01405	0.13958	0.05821	0.04004	0.02267	-0.12099	0.11357	0.09315	0.2599	0.31773	-0.4571	-0.06445	-0.10023	0.38116	-0.21914	-0.2141	0.02818	-0.05671	-0.32863	0.15177	-0.46665	-0.09603	-0.04732	0.00949	-0.05596	0.10021
YHR084W	-1.34628	-1.31436	-1.20689	-1.70084	-1.04569	-1.08563	-0.77183	-0.70278	-0.81764	-0.93678	-0.82168	-0.65616	-0.09559	-0.05164	-0.22407	-0.29089	-0.32849	-0.2007	0.19446	-0.30497	0.17314	0.14182	-0.08926	0.2395	-0.08464	-0.15668	-0.51185	-1.10458	-0.01256	-0.66813	-1.38171	-1.04719	-0.24203	-0.69412	-0.78605	-0.57116	0.2899	0.00428	0.29582	0.23458	-0.79924	-0.52377	-0.95735	-0.60033	-1.26613	-0.5874	-0.69316	-0.83196	-0.51061
YOR004W	-1.84153	-1.97697	-1.35652	-1.67778	-1.63044	-2.0822	-1.53082	-2.0845	-1.2605	-1.71597	-1.97642	-1.05478	-2.05496	-2.25596	-1.74737	-1.22625	-1.87484	-2.22649	-1.30122	-1.39997	-2.51538	-1.7399	-1.55493	-1.18007	-1.94825	-1.40951	-1.95447	-1.99463	-1.44204	-1.26444	-1.82628	-1.25162	-1.86709	-0.70611	-1.38277	-1.19914	-1.62052	-1.2507	-1.36857	-1.24411	-1.37981	-1.33581	-1.46554	-0.9174	-1.56269	-1.50778	-1.10251	-2.44866	-1.99346
YMR086C-A	-2.69292	-2.02038	-2.19187	-2.13231	-2.85762	-2.09472	-2.06716	-1.83588	-2.12943	-2.32366	-2.06018	-2.1661	-1.87065	-2.01105	-2.25528	-1.84068	-2.27559	-2.32134	-1.85578	-1.74806	-1.78794	-1.37322	-0.6828	-1.90286	-1.92806	-1.56913	-1.94181	-1.02746	-1.7336	-2.16362	-1.78573	-2.83635	-1.79223	-3.96101	-1.77441	-1.94241	-1.76142	-2.29327	-1.15336	-1.82371	-2.1606	-1.80406	-1.84224	-2.51661	-2.00306	-2.26531	-2.5173	-1.97603	-1.90266
YMR244W	-3.06801	-2.5611	-2.92727	-2.67589	-3.0215	-3.01064	-4.24009	-3.85239	-3.81623	-4.05056	-4.11908	-3.95811	-4.13603	-4.34271	-4.00748	-3.9171	-4.04165	-4.09889	-2.71772	-2.67587	-2.87446	-3.41473	-2.87209	-3.33967	-2.70051	-2.20378	-2.87473	-2.45381	-2.35659	-2.23037	-3.30355	-2.79033	-2.79293	-2.56753	-2.66055	-2.83263	-3.12626	-2.55527	-3.05889	-3.48009	-2.719	-3.23831	-2.30133	-2.56564	-3.0174	-2.39598	-3.20319	-2.97637	-2.76576
YMR233W	-0.57337	-0.35305	-0.4295	-0.54778	-0.31506	-0.66303	-0.95734	-0.50255	-0.72053	-0.82711	-0.73141	-0.76466	-0.37697	-0.59171	-0.72001	-0.78123	-0.89198	-0.72389	-0.98579	-0.5292	-0.6317	-0.66112	-1.22372	-0.3515	-0.60378	-0.51005	-0.5702	-0.34172	-0.72666	-0.50783	-0.50103	-0.57099	-0.52646	0.00593	-1.01763	-0.67291	-0.96921	-0.41462	-1.29615	-0.53296	-0.64022	-1.18704	-0.52696	-0.56235	-0.04304	-0.40166	-0.60124	-0.57844	-0.24223
YLL010C	1.12054	0.87314	1.15487	0.75834	1.18221	0.93685	0.83689	0.69073	0.67201	0.74243	0.93355	0.82347	0.94397	0.73538	0.74053	0.65033	0.76736	0.69311	1.53388	1.15054	1.3495	1.49992	1.60649	0.9766	1.52296	1.5997	1.6551	1.00417	1.53487	1.37604	1.15397	0.40168	1.53373	0.70452	1.29006	1.05639	1.58591	1.49036	1.43792	1.39528	1.35269	1.51354	1.73353	0.97573	1.37476	0.99483	1.39572	1.32275	1.12842
YNL188W	-1.22509	-1.47538	-1.29743	-1.56774	-1.42947	-1.08925	-2.1348	-2.12418	-1.89238	-1.66244	-1.68913	-1.84565	-1.19056	-1.44863	-1.64543	-1.61732	-1.876	-1.64627	-1.82242	-1.05734	-1.28397	-1.37988	-1.51779	-0.34593	-1.2435	-0.92287	-1.67081	-1.81404	-1.04135	-1.41888	-1.60715	-1.46245	-1.25037	-1.47698	-1.59476	-1.24825	-1.67095	-1.0314	-1.43092	-0.51125	-1.50959	-1.85247	-1.3016	-1.49376	-1.4192	-1.35125	-1.77162	-2.01017	-1.59918
YNL104C	3.13179	3.14537	2.86278	3.22332	3.16451	3.0487	3.47569	3.51316	3.62471	3.5903	3.59251	3.64419	4.26978	4.34163	3.94601	4.10267	4.22153	4.03484	3.60493	3.41143	3.25424	3.3397	3.60783	3.3336	3.43681	2.89305	3.94812	3.76152	2.87309	3.2168	4.44113	3.67219	3.15477	3.09628	3.68882	3.59742	3.02175	2.81755	3.24034	3.12751	3.55538	3.93128	3.07042	3.63762	2.93317	3.22273	3.4803	3.86964	3.05156
YKL156C-A	-4.57553	-4.7589	-5.47157	-5.15919	-4.07604	-4.45488	-4.80791	-4.18782	-4.75215	-5.28054	-4.65013	-5.2401	-4.65393	-4.61973	-4.9821	-5.42511	-4.9433	-4.60714	-4.09004	-4.12078	-3.98466	-4.19633	-4.5978	-4.78594	-3.93752	-4.40545	-4.6949	-4.77515	-3.87555	-3.72226	-4.09559	-3.65087	-4.45963	-3.66234	-3.86498	-4.29931	-4.32127	-4.85971	-4.31903	-4.55866	-4.12755	-4.66548	-4.14646	-3.62415	-4.45289	-4.33191	-4.02804	-3.95935	-4.20522
YIL005W	1.08834	0.95274	1.09254	1.03058	1.01232	1.19117	1.35306	1.46262	1.35421	1.25651	1.35355	1.09326	1.42585	1.57023	1.6742	1.2821	1.53546	1.39597	0.75997	1.29581	1.35591	1.46825	1.09553	1.12583	1.23285	1.18449	1.04899	0.99961	0.80412	0.92021	0.98399	0.48396	0.8162	0.05642	0.87519	1.15577	1.14672	1.11735	1.05447	1.34497	0.97669	1.21427	0.82347	0.56356	1.34911	1.18634	1.23422	1.4997	1.09612
YOR365C	-4.70072	-4.62098	-4.51219	-4.39062	-4.77752	-4.65277	-4.8261	-4.55454	-4.55875	-4.45427	-4.81864	-4.82244	-4.52651	-4.43439	-4.38881	-3.46725	-4.5702	-4.28872	-3.60204	-3.57833	-4.10061	-3.62425	-3.58677	-3.67301	-3.60198	-3.49109	-3.88087	-3.85034	-3.56015	-3.69591	-3.83461	-4.11619	-3.93263	-3.8537	-4.04137	-3.96539	-3.8029	-3.63028	-3.82777	-4.0808	-3.75088	-3.95775	-3.90664	-3.86128	-3.49306	-3.97956	-3.71054	-3.92307	-3.82481
YNR030W	1.85455	1.65623	1.49139	1.58002	1.69477	1.58861	1.42984	1.36205	1.59232	1.01413	1.42737	1.16283	2.20943	2.01277	1.86248	2.07701	2.10361	2.18193	1.49801	1.54336	1.03379	1.50698	2.04577	1.32115	1.51722	1.54985	1.82405	2.38239	1.14762	1.88041	1.73858	0.83996	1.04829	0.6669	1.52471	1.198	1.17537	0.84687	1.77498	1.53107	1.2843	1.63245	1.48728	1.89493	1.08693	1.55289	1.85338	1.63602	1.01794
Q0055	3.07433	2.32114	2.74176	3.3583	2.10783	3.10904	-3.06642	-1.97173	-3.00732	-2.60812	-3.13523	-2.75383	3.28624	4.35	4.65842	3.13703	4.26111	3.67082	0.60563	3.55178	1.69471	1.46427	1.37968	2.18288	1.92239	2.4049	1.08748	2.52539	1.54069	1.77534	2.29768	-0.18579	-0.37061	-0.65385	1.41108	2.84237	0.86845	2.01221	1.86335	3.1537	2.87452	2.33405	1.21251	0.49175	2.48613	2.75712	1.86227	2.94098	1.70669
YBR265W	0.80806	0.69199	0.7925	0.70807	1.11708	0.66452	1.29523	1.13034	1.03971	1.1146	1.22782	1.26019	1.50592	1.43481	1.43491	1.68761	1.71559	1.56082	1.22475	0.53344	0.90639	1.17957	1.24565	1.13465	1.09548	0.99542	1.69784	1.29629	0.61329	1.15004	1.30254	1.14964	1.10067	1.43429	1.04527	0.81008	1.47789	0.95762	1.13311	1.07082	1.12734	1.23044	1.07722	1.69342	0.93579	0.87305	1.56885	1.08643	1.08148
YGL131C	-0.75936	-0.81058	-0.77879	-0.83939	-1.02615	-0.6597	-1.07966	-1.16002	-1.12703	-1.07269	-1.35533	-1.15708	-1.24951	-1.24328	-1.41732	-1.33449	-1.53313	-1.68247	-0.91825	-0.54237	-0.79623	-0.51187	-0.99264	-0.96647	-0.93848	-0.85749	-0.84731	-0.54065	-0.6556	-0.89854	-1.22465	-1.07192	-1.16049	-1.38642	-0.85851	-0.91851	-0.97395	-1.0892	-0.89522	-0.9247	-0.97847	-0.6789	-0.89185	-0.76447	-1.00541	-0.86754	-1.42798	-0.70054	-0.87248
YDL162C	-4.35045	-4.72174	-4.34158	-4.39833	-4.21691	-4.6003	-4.61101	-4.30483	-4.68456	-4.60847	-4.60558	-4.45705	-4.24935	-4.3834	-4.06305	-4.24284	-4.35761	-3.92489	-3.42319	-3.57011	-3.65639	-3.89862	-3.95093	-3.54907	-3.66165	-3.32728	-3.62948	-3.60303	-3.74251	-3.38099	-3.80698	-3.75169	-3.90655	-3.30883	-3.70226	-3.9369	-3.42801	-3.61299	-4.00314	-3.48009	-4.20038	-4.02569	-3.83215	-3.52511	-3.72024	-4.07751	-3.99846	-4.06643	-3.81261
YHR033W	-0.74842	-0.54522	-1.2218	-0.89818	-0.62262	-0.86288	-0.82529	-0.93421	-1.53743	-0.86948	-0.73237	-0.94082	-0.84676	-0.86923	-1.12152	-0.25551	-0.83397	-0.65396	0.03743	-0.75469	1.3226	1.39833	-0.62683	-1.57548	-0.78798	-1.72932	0.21892	-0.18213	-0.12478	-1.79342	-0.53376	-0.95187	-1.07382	-0.50133	-0.40693	-0.30071	-0.12834	-1.02097	-0.77486	-1.64652	0.33601	0.68585	-2.04375	-0.48349	-1.44502	-1.85094	-0.85837	-1.71369	0.60877
YNR040W	-0.96913	-0.51229	-0.75441	-0.69734	-0.6331	-0.74842	-0.13529	-0.01466	-0.41947	-0.10308	-0.17418	-0.02625	-0.17598	-0.00949	0.12436	0.23464	0.12525	0.02465	-0.49069	-1.02144	-0.41239	-0.55511	-0.06675	-0.12791	-0.72872	-0.68078	-0.31145	-0.3832	-0.92105	-0.74073	-0.35015	0.33761	-0.0194	0.32254	-0.41594	-0.63566	-0.34482	-0.53067	-0.46297	-0.38643	-0.40582	-0.66504	-0.77286	0.08268	-0.67481	-0.64731	0.22946	-0.70463	-0.649
YDR246W-A	0.01881	-0.73154	-1.30599	-1.02277	-0.95485	-1.65289	-0.99109	-1.00249	-0.91176	-1.01103	-0.89923	-1.00376	-0.92831	-1.24009	-1.34527	-0.98529	-1.55846	-1.18792	-0.75879	-1.34816	-0.85993	-1.02806	-0.80665	-1.70103	-0.35739	-0.61539	0.36609	-0.48689	-1.2478	-1.27463	-0.23988	-0.23313	-0.32234	-0.53551	-0.00268	-1.39918	-0.56852	-1.52986	-0.60978	-1.66616	-0.80936	-1.02831	0.63081	-1.21454	-0.64448	-1.24461	-0.83434	-1.05762	-0.90008
YNR034W	1.80564	1.97583	1.56138	1.52214	1.86041	1.73074	1.96113	2.19087	1.73238	1.96492	1.77853	1.73501	1.43163	1.43042	1.67441	1.61043	1.7932	1.62038	2.06412	1.46794	2.2716	2.49925	2.05668	1.2084	2.08625	2.21892	2.46567	2.29991	2.05853	1.42513	2.26651	2.30213	2.01879	2.04044	2.33086	1.94373	2.45194	2.26772	1.61818	1.16842	2.21728	2.45622	1.95984	2.08087	2.19865	1.78432	2.33141	2.40923	2.46423
YEL076C	0.63579	-0.22028	0.4064	0.01477	0.95557	0.00842	-0.35836	-0.02776	0.04796	-0.14519	-0.19491	-0.37502	-0.40165	0.01285	0.01741	-0.75585	0.05337	-0.16689	-0.33589	-0.13104	-0.77952	-0.51028	0.31497	-0.24973	0.96446	0.40336	-0.7073	-0.68688	0.31578	0.28899	0.12107	0.26101	-0.74545	-0.30541	0.08427	0.20542	-0.17687	-0.09494	0.34937	0.18617	-0.51981	-0.48011	0.34086	-1.33488	0.03023	0.47722	-1.09363	-0.30435	-0.46471
YHL046W-A	-4.2742	-5.11672	-4.59409	-5.29926	-5.33067	-4.78632	-4.5056	-4.63394	-5.17114	-4.82925	-4.80472	-4.97378	-5.00674	-4.57904	-5.07866	-4.67883	-4.59504	-5.02028	-4.16231	-3.90851	-4.10062	-3.92565	-3.73477	-4.56572	-3.60201	-4.0846	-4.07548	-4.03303	-3.95656	-4.2312	-4.09559	-4.23655	-4.38422	-4.02444	-4.3567	-4.30818	-4.0797	-4.68248	-3.80179	-4.62008	-4.10422	-4.31694	-4.2328	-3.88834	-4.1404	-4.23657	-4.24696	-4.38208	-4.17249
YDL071C	-2.85007	-2.41342	-2.77124	-2.72919	-2.12079	-2.9022	-2.15615	-1.79166	-2.00838	-1.92737	-2.01578	-2.06603	-2.10535	-1.95583	-2.2303	-1.92928	-2.68833	-2.53658	-0.85994	-2.21886	-1.52164	-1.19456	-0.79624	-1.80722	-1.41866	-1.13511	-1.96331	-1.93281	-2.39455	-2.39979	-1.52824	-2.003	-1.16575	-2.26945	-1.71525	-1.93244	-1.38459	-1.6173	-0.53861	-1.7797	-2.37765	-1.94968	-1.81788	-1.65883	-2.26738	-2.50295	-2.52997	-2.58741	-2.16582
YOR173W	2.03764	2.14318	2.08037	1.85089	2.06455	2.39259	3.18186	3.37612	2.5679	3.28141	2.93956	2.97187	0.98969	1.47156	1.7124	1.98593	1.82204	1.77873	2.05877	2.67395	3.14764	3.17973	2.73428	1.80621	2.50413	2.70236	3.06533	3.07436	1.53683	1.21218	2.51593	2.23086	2.47707	1.71879	1.47902	1.55021	2.41495	2.49877	2.10278	1.76774	2.89877	2.82095	1.75939	1.64107	2.91132	1.50228	3.29329	3.88062	2.75121
YOR337W	-0.89848	-0.97257	-0.84566	-1.10819	-0.74251	-0.80303	-1.48138	-1.43123	-1.49172	-1.7216	-1.80022	-1.09706	-1.23403	-1.16993	-1.20364	-1.13564	-1.45898	-1.51304	-0.41396	-0.94707	-1.41193	-1.53985	-1.07223	-1.1516	-1.26324	-1.31095	-1.16426	-1.38274	-0.58242	-1.01581	-1.49631	-1.06815	-0.758	-0.85898	-0.38791	-0.64575	-0.91356	-1.15962	-0.91368	-1.26067	-1.27195	-1.10257	-0.87923	-0.75006	-1.0641	-1.09775	-1.13009	-1.6008	-0.58639
YNL181W	0.09115	-0.0553	0.14464	0.0103	0.09503	0.05406	0.05191	0.08941	0.10351	0.19338	0.19244	-0.08976	-0.19821	0.18204	0.12909	-0.13649	0.1463	-0.03828	-0.29019	0.16086	-0.13543	-0.2797	-0.62139	0.14794	-0.37567	-0.26367	-0.09364	-0.19915	-0.32321	-0.20726	-0.0538	-0.11645	-0.1921	-0.12424	-0.12885	0.14677	-0.514	0.0184	-0.26993	0.28108	0.00821	-0.20968	-0.2364	-0.5763	0.07969	0.34188	0.19588	-0.00175	0.19233
YGL104C	0.0066	0.12082	-0.219	0.14124	0.06883	0.23911	0.76637	0.86818	0.69916	0.93506	0.75461	0.82493	0.71371	0.72638	0.53995	0.785	0.93425	0.79421	0.47867	0.44202	0.93548	1.17399	1.03728	-0.12027	0.96288	0.88909	0.30717	0.66324	-0.48599	0.16044	0.59993	0.0026	0.4488	0.44698	0.26681	0.07737	0.87308	0.8595	0.71059	-0.40241	0.23345	0.72727	0.65134	0.84178	0.46041	0.14331	0.74828	1.24798	0.38079
YDR164C	-0.28457	-0.52579	-0.5012	-0.52515	-0.32583	-0.23849	-0.18894	-0.06079	-0.14628	0.04737	-0.02161	-0.40117	-0.08613	0.07001	-0.02065	0.03632	-0.29109	-0.15523	-0.32593	0.01644	-0.08934	-0.27184	-0.53623	0.43423	-0.17815	-0.60897	-0.60261	-0.59593	-0.40546	-0.28307	-0.38703	-0.2718	-0.28139	-0.35514	-0.32655	-0.0678	0.09757	-0.27635	-0.24998	0.25798	0.00743	-0.41502	-0.73573	-0.87972	-0.25342	-0.29187	-0.29603	-0.33275	-0.35904
YGR243W	0.86489	1.01974	0.61502	1.03315	0.84304	0.56561	2.37354	2.48892	2.43883	2.3362	2.34843	2.09546	1.31133	1.20653	1.36394	1.19422	1.66847	0.99741	1.48499	1.00945	2.67103	2.68679	2.15221	1.34088	2.49897	2.55929	2.77232	2.36556	0.92322	0.93229	2.2672	1.70983	1.92252	1.48864	0.93112	0.96356	2.53324	2.3245	1.90806	1.08496	2.14008	2.31492	1.91621	1.41347	2.63241	1.31995	2.02435	2.3471	1.67395
YOR107W	-3.44769	-2.8088	-3.30501	-3.13418	-3.2114	-3.03988	-2.61717	-2.59802	-3.15046	-2.9395	-2.9142	-2.85787	-2.14909	-1.75534	-2.14343	-1.14786	-2.0478	-1.92592	-2.07137	-2.5121	-1.94498	-2.45226	-2.53329	-1.33016	-1.91305	-2.12556	-2.24949	-2.68751	-1.91018	-2.3178	-2.65855	-1.61581	-1.90904	-1.25228	-2.84536	-2.5626	-1.50852	-1.88314	-2.6768	-1.78203	-2.29376	-2.55173	-2.89315	-2.75124	-2.64412	-2.12555	-2.05531	-1.67136	-2.16905
YDR464W	-0.91091	-0.80562	-0.86645	-1.11408	-0.95089	-1.01142	-1.58858	-1.42056	-1.04626	-1.32976	-1.21626	-1.16914	-1.13736	-1.71499	-1.5505	-1.65338	-1.78163	-1.55952	-1.44345	-0.79392	-0.89761	-0.97265	-1.47492	-0.39731	-0.76723	-0.87899	-1.04447	-1.57932	-0.84555	-0.7098	-1.53451	-0.88294	-0.75949	-0.72631	-1.22993	-0.71456	-1.01976	-0.47468	-1.09134	-0.57952	-0.70851	-1.06198	-0.76143	-0.66762	-0.89041	-0.74257	-0.98833	-1.42158	-1.00189
YGR210C	1.88813	1.79931	1.68555	1.73971	1.63381	1.52823	1.37479	1.32115	1.3407	1.32015	1.41122	1.4456	1.52589	1.56326	1.65172	1.27018	1.35677	1.21557	1.19484	1.5558	0.45738	0.61984	1.40326	1.20044	1.0758	1.44183	0.78211	1.20127	1.77344	1.32251	0.94825	1.99104	1.6594	2.50205	1.70905	1.61973	0.67139	0.87792	2.01995	1.43332	1.13833	1.31239	1.39938	1.75472	0.68494	1.46798	1.3563	0.62113	1.29652
YOR168W	1.23534	1.12529	1.50554	1.55911	1.49031	1.39686	1.48912	1.38814	1.44331	1.37976	1.37707	1.47612	1.47396	1.79124	1.89567	1.59204	1.71942	1.83048	1.1477	1.61098	1.32017	1.04261	1.16929	1.92142	1.27488	0.98201	0.98841	0.76276	1.54292	1.14296	1.12285	1.17389	0.90234	0.87591	1.29548	1.63891	1.40189	1.00939	1.05326	1.59298	1.63327	1.58802	1.26592	0.65864	1.44286	1.25905	1.57403	1.42217	1.75369
YLR012C	-3.59621	-3.05525	-3.11169	-3.2052	-3.16363	-2.90966	-4.00939	-4.12624	-4.02366	-4.04971	-4.12599	-4.76196	-3.77289	-3.72875	-3.518	-4.40465	-1.9966	-3.8487	-3.03361	-2.94628	-3.1998	-3.69787	-3.75129	-3.35624	-3.009	-3.05521	-3.70623	-2.99576	-2.96773	-2.91822	-3.10891	-3.7528	-3.32908	-3.34083	-3.16132	-3.5127	-3.30179	-3.09012	-3.76439	-3.59516	-2.96355	-3.63723	-3.45885	-3.10822	-2.94271	-2.53233	-3.23049	-2.97771	-2.92871
YNL002C	-0.53813	-0.70782	-0.46748	-0.44614	-0.28961	-0.68978	-0.21868	-0.84678	-0.07757	-0.52487	-0.5258	0.00849	0.20868	-0.32093	-0.09662	-0.16542	-0.28842	-0.33539	-0.26684	-0.31415	-0.85565	-0.91858	-0.44281	0.49662	-0.84544	-0.48098	-0.54184	-0.96818	-0.13164	0.2829	-0.67161	0.08031	-0.60969	0.18928	0.158	0.23485	-0.55186	-0.71955	-0.02992	0.20205	-0.38681	-0.39307	-0.10582	-0.24067	-0.42045	-0.24718	-0.39105	-1.65474	-0.34581
YLR054C	-3.29155	-3.5011	-3.61455	-3.83357	-3.87805	-3.83113	-4.49289	-4.18782	-4.08979	-3.96183	-4.22757	-4.23085	-4.43703	-4.39432	-4.38821	-4.58181	-4.53099	-4.42209	-3.03661	-2.89961	-3.23164	-3.55591	-3.43581	-3.27679	-3.42292	-3.72969	-3.26199	-3.4251	-3.07613	-3.23033	-3.34535	-3.44237	-3.30101	-3.77346	-3.38733	-3.50432	-3.58376	-3.35247	-3.6286	-3.49335	-3.37909	-3.4395	-3.35866	-3.60761	-3.30136	-3.35001	-3.4823	-3.29284	-2.9355
YHR193C	3.84215	3.94268	4.0222	3.9501	3.98415	3.70997	4.85137	4.35471	5.1843	5.12359	5.01317	4.85563	5.38133	5.29315	5.2584	4.88047	5.18611	5.02202	4.55508	4.64321	4.49483	4.26306	4.20522	4.46403	3.96734	4.24529	4.11767	4.20641	4.6398	4.76981	5.12097	4.76563	4.35574	3.79638	4.70944	4.67379	4.57016	4.55629	4.31735	4.44666	4.55836	3.67601	4.40822	4.67389	4.75092	4.60621	4.9017	4.22041	4.80238
YNL294C	-0.24338	0.30842	0.09643	0.25725	-0.06699	0.047	0.24417	0.16924	0.23705	0.6216	0.21769	0.26753	-0.45968	-0.3408	-0.33892	-0.05069	-0.20667	-0.28195	-0.17704	0.02916	-0.33816	-0.04246	0.45938	-0.5019	0.46949	0.405	-0.36377	0.21259	-0.10678	0.2351	0.24627	0.34264	-0.03968	0.34323	0.11125	0.05273	-0.06396	-0.29607	0.35927	-0.18578	-0.05002	-0.0369	0.11628	0.95471	-0.33831	-0.18842	-0.06478	-0.05405	-0.55908
YOR005C	-1.42414	-1.26958	-1.494	-1.49851	-1.11497	-1.08054	-1.50572	-1.23242	-1.49725	-1.48275	-1.69019	-1.52333	-1.67474	-1.40633	-1.41027	-1.3728	-1.62278	-1.58235	-1.51557	-1.33899	-1.03234	-1.32681	-2.16141	-1.60798	-1.84268	-1.49446	-1.3635	-1.42308	-1.90384	-1.82872	-1.39397	-1.52715	-1.30792	-2.47866	-1.49915	-1.59474	-1.59929	-1.21437	-1.94253	-1.72464	-1.50693	-1.47595	-1.83133	-1.61031	-1.36301	-1.64809	-1.46361	-1.06388	-1.0921
YPR147C	-0.03474	0.16765	-0.01548	0.20848	-0.21838	-0.00193	-0.18693	-0.13021	0.02638	0.02058	-0.05331	-0.2323	-0.27978	-0.14858	-0.35571	-0.01016	-0.18551	-0.14289	0.01661	-0.08458	-0.33088	-0.12007	0.36558	-0.65174	0.05903	-0.00705	-0.00478	0.54276	-0.27155	0.31024	0.15466	-0.08474	-0.61145	-0.52893	-0.01504	-0.20754	-0.19899	-0.27218	0.05894	-0.43519	-0.00996	0.15085	-0.16915	-0.15171	-0.33401	-0.09005	-0.01046	0.29342	-0.23827
YBR092C	0.9962	0.55727	1.34996	0.96956	0.86821	0.57164	0.24488	-0.04507	0.51138	0.30889	0.16906	0.30495	1.02305	0.82506	1.26652	1.56012	1.49665	1.22607	1.73407	1.97318	0.12232	0.51871	1.08535	0.88698	0.18302	0.48921	0.60478	0.97488	2.27708	0.61262	0.62216	0.70675	0.4495	0.77499	1.23732	2.42988	0.70283	-0.04858	0.74747	0.23411	0.66457	0.77325	0.01384	0.39199	-0.15761	0.04051	1.20329	0.27049	0.3003
YOR242C	-4.03824	-3.87651	-4.02282	-4.12021	-4.00124	-3.62081	-3.78953	-3.39391	-3.6263	-3.62876	-3.66757	-3.47092	-2.6725	-2.5254	-2.89492	-3.09843	-2.9402	-2.99204	-3.68187	-3.02516	-3.32135	-3.34706	-3.5269	-2.61841	-3.46241	-3.61234	-3.61325	-3.44442	-3.41886	-3.07057	-3.46139	-3.32406	-3.71739	-3.71835	-3.6572	-3.27256	-3.35906	-3.34525	-3.33913	-2.80098	-3.13287	-3.51013	-3.52793	-3.73163	-3.2617	-3.18956	-3.50887	-3.5434	-3.01417
YJL028W	-4.20439	0.68567	-4.2717	-4.29592	-4.5512	-4.3508	-3.63077	-4.43721	-4.51736	-4.2705	-4.24015	-3.98428	-4.05702	-4.41828	-4.27103	-4.00629	-2.80705	-3.92444	-3.22784	-3.39193	-3.88833	-3.8672	-3.27212	-3.33611	-3.37581	-3.12785	-3.71484	-3.33347	-3.50338	-3.7471	-3.50168	-3.93565	-3.83789	-2.81286	-3.20221	-3.4182	-3.56555	-4.11665	-3.56439	-3.60394	-3.50943	-3.2937	-3.3631	-3.55386	-3.22534	-3.57941	-3.11691	-3.80982	-3.64329
YLR077W	-0.05396	0.02886	-0.09307	-0.32967	0.04463	0.01692	-0.281	0.01989	-0.19816	-0.06086	-0.16659	-0.03945	-0.08339	0.02208	0.05548	0.07077	0.19209	-0.11504	-0.26615	0.13325	-0.03752	-0.01486	0.01111	0.22206	-0.28861	-0.3243	-0.39729	-0.46804	-0.33533	-0.34634	-0.47893	-0.35135	0.19742	0.0225	-0.10781	0.0252	-0.42698	-0.05931	-0.30362	0.2599	-0.31857	-0.50169	-0.49738	-0.08417	-0.24618	-0.2765	-0.09416	-0.32447	0.03771
YCR081W	-0.77928	-0.55425	-0.64891	-0.68403	-0.60329	-0.47928	-1.02699	-0.85681	-0.97164	-1.04965	-1.00738	-0.93473	-0.76393	-0.45451	-0.58345	-0.55373	-0.6311	-0.75113	-0.81096	-0.89738	-0.64106	-0.80699	-1.04827	-0.74617	-0.86333	-0.95234	-0.72029	-0.89399	-0.68401	-1.03095	-1.08254	-0.83847	-0.89235	-1.25291	-0.87412	-0.717	-0.55535	-0.6367	-0.96861	-0.76807	-0.7619	-0.68938	-0.96695	-0.7846	-0.74548	-0.89789	-0.81178	-0.75862	-0.9351
YOR396C-A	-1.65748	-1.49265	-1.69831	-1.46013	-1.09214	-2.11332	-0.80864	-1.18961	-0.80974	-1.08281	-1.0977	-0.85149	-3.11515	-3.13348	-3.37339	-3.23201	-3.33061	-3.27983	-1.14223	-1.93371	-2.05913	-2.23539	0.0247	-2.02988	-1.1409	-0.20667	-1.5074	-1.11252	-1.88234	-1.59826	-0.921	-0.90212	-0.81004	0.1298	-1.44245	-1.74313	-1.48563	-1.79548	-0.98975	-2.53107	-1.97596	-0.72202	-0.87815	0.00144	-1.77817	-1.81223	-2.77408	-2.27073	-1.75707
YLR458W	-4.29217	-4.85898	-4.38391	-4.84443	-4.8143	-4.72519	-4.54932	-4.8602	-4.86174	-4.87246	-4.71198	-4.8163	-4.48092	-4.46101	-4.58105	-5.31494	-4.75986	-4.40898	-3.91959	-3.85053	-4.18826	-4.0922	-4.10638	-4.33613	-4.1385	-4.05986	-4.1357	-4.04836	-4.06934	-3.64391	-4.14426	-4.82073	-4.73178	-3.91077	-4.24553	-3.8228	-3.9139	-4.17572	-4.10747	-4.26874	-3.8779	-3.73721	-4.10548	-3.79068	-3.55704	-4.488	-3.77556	-4.49404	-4.04657
YBL040C	2.65537	2.77127	2.75619	2.88493	2.4846	2.60148	2.65853	2.68529	2.98004	2.60416	2.63562	2.52246	2.70307	2.73937	2.72407	2.11193	2.40448	2.799	2.14674	2.31875	2.43851	2.26775	2.19372	1.46805	2.45931	2.20489	2.46441	2.74764	2.13136	2.6549	2.40668	1.64201	1.55636	1.17141	2.6666	2.42152	2.22728	1.80177	2.43587	1.83435	2.57167	2.77529	2.60956	1.75506	2.37082	2.8134	2.19001	2.40973	2.41494
YJR127C	1.61044	1.61395	1.46509	1.69538	1.6279	1.64342	1.22894	1.30086	1.06595	1.20729	0.93463	1.33923	0.92599	1.04159	1.00735	0.97633	1.2085	1.3318	1.22863	0.89492	1.76821	1.91258	1.31779	0.63464	1.57712	1.7621	1.91379	1.86461	1.28437	0.76384	1.84439	1.6287	1.19856	1.22048	1.19323	0.87159	1.97214	1.94503	1.35619	0.74041	2.02685	2.32445	1.52351	1.36852	1.72606	0.76832	1.5159	1.80127	1.71347
YJL176C	-0.24058	-0.39117	-0.29847	-0.4553	-0.40289	-0.3076	-0.33541	-0.31041	-0.12782	-0.22095	-0.16199	-0.34401	0.00109	-0.49095	-0.25847	-0.66801	-0.5544	-0.36136	-0.65033	-0.27882	-0.2621	-0.10438	-0.36886	-0.11936	-0.40957	-0.25973	-0.40026	-0.47223	-0.4241	-0.31567	-0.65911	-0.82481	-0.39455	-0.73433	-0.1361	0.00717	-0.3981	-0.06489	-0.21791	0.14991	-0.37848	-0.35336	-0.2434	-0.3538	-0.29493	-0.26389	-0.72942	-0.45029	-0.44815
YLR453C	-1.89127	-1.65929	-1.83623	-1.72647	-1.73686	-1.81468	-1.68224	-1.24477	-1.45931	-1.40726	-1.70541	-1.34746	-1.38912	-1.08237	-1.3728	-1.44116	-1.36756	-1.70808	-1.72057	-1.78787	-1.50869	-1.52726	-2.08718	-1.42784	-2.11536	-2.04126	-1.55437	-1.91501	-2.33235	-1.92366	-1.36992	-1.40306	-1.62874	-1.06323	-1.72559	-1.68747	-1.50141	-1.6713	-1.78834	-1.48691	-1.48306	-1.84532	-1.75018	-1.78082	-1.46363	-1.81792	-1.77669	-1.498	-1.45026
YCR007C	-2.19001	-1.7083	-1.42848	-1.60029	-1.78844	-1.46506	-2.05138	-1.61498	-1.8236	-1.69505	-1.35139	-1.81718	-1.68382	-1.59105	-1.71814	-1.58339	-1.9034	-1.77147	-1.04015	-1.39179	-1.05359	-1.74162	-1.97475	-1.69203	-1.68583	-1.48914	-1.56169	-1.1	-1.12038	-1.64273	-1.75828	-2.0704	-1.39084	-1.32786	-2.02978	-1.63093	-1.48563	-1.54195	-1.90914	-1.55932	-1.46632	-1.65794	-1.32829	-1.96262	-1.86352	-1.56229	-1.57998	-1.32913	-1.23046
YHR128W	1.73152	1.158	2.11991	1.78794	1.8133	1.8504	2.39112	1.7847	2.08848	2.15541	2.16284	2.22671	2.6402	2.74487	3.05229	2.40872	2.90827	2.5725	1.44636	1.13118	0.94531	1.37038	2.22446	1.88438	1.57023	1.43139	1.33617	1.61448	1.18168	2.09643	1.48649	1.54693	0.95732	1.31865	1.72006	1.93357	1.74028	0.95312	2.33461	1.97712	2.34074	2.47301	1.67228	1.12986	1.9751	1.36101	2.00703	1.91353	1.47472
YOR297C	0.76551	0.05045	0.88896	0.55475	1.07555	0.69647	0.97438	1.06878	0.90534	0.96923	0.5881	0.37741	1.10288	1.55175	1.37711	1.2059	1.42034	1.20803	0.58177	0.24743	0.76694	0.71578	1.25214	0.69816	1.19614	1.24027	0.70763	1.14202	0.58023	0.89623	1.12	0.13889	-0.72973	-0.38684	0.0755	0.28597	0.51393	0.20837	1.20006	0.83436	0.89173	1.25594	1.31354	0.56192	0.97584	0.56614	0.71085	1.15214	0.5633
YDR225W	3.35409	3.14097	3.50506	3.4315	3.46514	3.37122	3.94337	3.21938	3.45089	3.39508	3.47661	3.36263	3.30997	2.87846	3.58807	3.12929	3.24141	3.32145	3.14342	3.24982	3.07279	3.28733	3.1478	3.3007	3.75722	4.16232	3.633	3.34656	3.37589	3.68902	3.8877	2.93473	3.02415	2.04206	3.45156	3.67345	3.20859	3.25645	3.54339	3.72957	3.11785	3.38061	3.61268	3.4603	3.95175	3.46151	2.99693	3.20665	3.45858
YPR020W	1.52643	1.37419	1.30429	1.43747	1.41804	1.37399	2.61474	2.7682	2.53896	2.63491	2.79106	2.51636	3.22764	3.2978	3.42552	2.57846	3.31062	2.87913	1.58744	1.29622	2.23967	2.00174	1.6718	2.3984	1.45448	1.55403	1.92218	1.81387	1.51995	1.81743	2.54067	1.58593	1.59712	0.25038	1.43017	1.35401	2.06388	1.68352	1.44088	1.74995	2.62277	2.22631	1.63955	1.12552	2.24303	1.90317	1.9554	1.71945	1.86816
YJR003C	-0.44754	-0.55491	-0.37006	-0.40927	-0.30822	-0.32418	-0.88249	-1.05737	-0.97784	-1.2025	-1.0846	-1.01509	-0.75878	-0.79978	-0.86164	-1.05761	-0.81844	-0.90377	-0.50198	-0.49407	-0.86774	-0.86335	-1.1988	-0.8174	-0.91461	-0.80638	-1.41311	-0.89312	-0.44133	-0.39399	-1.21631	-0.96237	-0.86871	-0.80456	-0.54592	-0.30451	-0.7533	-0.53567	-0.68987	-0.5653	-1.42288	-1.07038	-0.77069	-0.41029	-0.75297	-0.59822	-1.30953	-1.83759	-0.59782
YIL101C	-1.3527	-1.06828	-1.49801	-1.2261	-1.3054	-1.56376	0.26454	0.27108	-0.4197	0.09087	-0.02918	0.09568	-2.35178	-2.13467	-2.39049	-1.22789	-2.29124	-1.80414	-0.23199	-0.85855	1.95999	2.45871	1.48537	-1.16129	1.58141	1.52258	0.88936	1.15001	-0.85325	-1.00915	0.62193	-0.04345	0.47421	0.33664	-1.45335	-1.75041	0.77658	0.30905	2.05995	0.19358	0.92371	1.58842	-0.96518	-0.21253	-0.62757	-1.48628	0.65472	1.5275	-1.17794
YHR136C	1.63103	1.45713	2.05899	1.90991	1.34794	1.25749	-0.49825	-1.16674	-0.53268	-1.23823	-0.54897	-0.77751	1.37296	1.06483	0.95161	0.76087	1.33218	0.91522	2.14746	1.7722	-0.06396	0.56294	-0.09634	-0.855	0.16086	1.20247	2.01944	2.23284	3.12129	1.58724	2.21913	2.20919	0.4965	0.57746	2.72603	2.42689	-0.63873	-0.48836	-1.29754	-1.49862	-0.81439	0.00711	-0.73995	0.24018	-0.28912	1.37139	-1.23213	-1.5772	0.24876
YPL189W	-3.26742	-2.41745	-3.04766	-2.91455	-2.80865	-2.9628	-1.82127	-1.98336	-2.22803	-1.9637	-2.21948	-1.92164	-2.09566	-2.02284	-2.42465	-1.79053	-2.17872	-1.98597	-2.5909	-2.65698	-3.02471	-2.71437	-1.48633	-1.97257	-1.95938	-2.09027	-2.55691	-2.23915	-2.74755	-0.82279	-2.25285	-1.94966	-2.49431	-2.14146	-2.26719	-2.28017	-1.86142	-2.17169	-1.7821	-2.18466	-1.85877	-1.54372	-2.39949	-1.87372	-2.62986	-1.06072	-2.3926	-1.75891	-2.51098
YPR114W	2.1409	2.03832	1.8475	2.09347	2.38655	1.74527	1.81156	1.48843	1.43896	1.47881	1.59908	1.67523	2.07115	1.96118	1.91981	2.13446	1.79602	1.7794	1.99202	1.2278	2.43436	2.4151	2.70202	2.15498	2.03924	2.16509	1.89443	1.72146	2.22558	1.98792	1.75973	1.69946	2.40814	2.41005	2.2827	2.02884	2.54311	2.26087	2.62374	2.3578	1.83702	2.15262	2.12945	2.24295	1.16045	2.28088	1.55947	1.31012	2.12641
YJL056C	-1.22437	-0.89422	-1.09777	-1.16646	-1.4083	-1.35015	-1.9716	-1.93578	-1.86166	-1.86985	-2.0359	-1.53656	-1.94741	-1.84819	-1.98277	-1.76333	-2.17744	-1.90644	-0.90556	-1.20101	-1.9073	-1.82394	-1.14719	-1.24534	-1.87859	-1.964	-0.81189	-0.96979	-1.07206	-1.36012	-1.81773	-1.03989	-0.81968	-0.94	-0.93288	-1.41982	-1.42941	-1.55909	-1.89055	-1.72145	-1.38609	-1.38373	-0.48864	-0.57689	-1.14728	-1.54633	-1.87276	-1.6389	-1.84119
YDR482C	-0.54204	0.13158	-0.52712	-0.64009	-0.59729	-0.78293	-0.75896	-0.59878	-0.54699	-0.86387	-0.32685	-0.64667	-0.58063	-0.69822	-0.8582	-0.93393	-1.17844	-0.86132	-0.89841	-0.72784	-0.65989	-0.5749	-0.38981	-0.2878	-0.36346	-0.20667	-0.61029	-0.79253	-1.09445	-0.28864	-0.38125	-0.14136	-0.06701	0.79955	-0.61459	-0.67077	-0.96389	-0.21858	-0.18004	-0.58008	-0.50843	-0.57959	-0.63205	0.03607	-0.89346	-0.44333	-0.45763	-1.24242	-1.1525
YPL247C	1.59546	1.59386	1.37673	1.27418	1.50959	1.34299	2.56927	3.02007	2.02142	2.80465	2.50954	2.85461	1.93952	1.97438	2.31267	2.54634	2.28632	2.57346	2.55253	1.33147	2.87158	2.95767	2.83095	1.03937	2.90114	2.92742	2.73782	2.27771	1.3102	2.28453	3.1892	2.36389	2.75546	2.2453	1.75098	1.01002	2.63124	2.39592	2.49843	1.29604	2.59364	3.02213	2.00084	2.32352	1.72228	2.27691	2.90441	3.20478	2.41613
YBL058W	2.03263	2.23536	2.00807	2.16478	2.24063	2.02287	2.30247	2.28232	2.16598	2.13212	2.36694	2.39915	2.15303	2.12833	2.3701	1.95622	2.02817	2.21024	1.68533	2.13138	2.04719	2.06676	2.02943	2.21938	1.98313	2.0688	1.94095	1.85504	1.5398	2.10863	1.78081	2.29053	2.07681	2.74309	2.16229	2.21837	1.75078	2.22763	2.05755	2.33749	2.12765	1.66586	1.85691	2.05342	1.94611	2.28195	2.4872	1.82574	2.02344
YJL122W	-0.74517	-0.4918	-0.3138	-0.5778	-0.53544	-0.94713	-0.16326	-0.58018	0.15839	-0.43045	-0.34569	0.04937	0.5688	-0.16512	0.35826	0.34043	-0.0176	0.29636	0.09582	-0.12338	-0.69287	-0.57098	-0.16227	0.53376	-0.56637	-0.279	0.06574	-0.47955	0.13779	0.26909	-0.5118	-0.30745	-0.53225	-0.04204	0.16385	0.22169	-0.36662	-0.57297	0.08767	0.5057	-0.35104	-0.05675	-0.11301	-0.04759	-0.56448	-0.29381	-0.11155	-1.40287	-0.20705
YKL107W	-3.15775	-2.49742	-2.77966	-2.98701	-2.77269	-2.64595	-2.66401	-2.32824	-3.26296	-2.6684	-2.88278	-2.29362	-3.12419	-3.07184	-2.93298	-2.4979	-3.42317	-3.37286	-2.0317	-1.98433	-1.88475	-1.81216	-2.05742	-2.58402	-2.41935	-2.39755	-1.98295	-1.85689	-2.72601	-2.37305	-1.88704	-1.22424	-2.07534	-2.24049	-2.48538	-2.47839	-2.19059	-2.10435	-2.63575	-2.63083	-2.28887	-2.55714	-2.67194	-2.35045	-2.40793	-2.22508	-2.44503	-1.51656	-2.14559
YLL039C	4.4591	4.63941	4.59529	4.57611	4.56633	4.70071	5.27227	5.55468	5.33025	5.617	5.25819	5.26442	5.22659	5.55738	5.37926	5.08745	5.62565	5.71489	4.78682	5.17771	5.15936	4.72067	4.55164	4.45598	4.64547	4.85121	5.4745	5.53644	4.85852	5.18218	5.1704	5.12581	4.85	4.90358	5.1142	5.28854	4.91125	5.10393	4.6068	4.63238	5.12418	5.51522	4.42747	5.17499	5.61096	5.57696	5.57297	5.89166	5.40873
YCL017C	1.25021	1.4464	1.34629	1.52735	1.20013	1.33921	2.07834	1.90737	1.98264	1.86121	2.04947	2.04324	2.25196	2.18221	2.21418	2.28466	2.33129	2.13413	1.8328	1.66468	1.74134	1.85532	2.04528	1.437	1.53794	1.16352	1.94901	1.8698	1.32303	1.95346	2.00428	1.81494	1.35055	1.30436	1.47852	1.4769	1.70462	1.28549	1.75393	1.14022	2.16898	2.19323	1.84659	2.04892	1.1119	1.74048	2.10646	1.9637	1.67402
YER085C	-3.48355	-3.20016	-3.39364	-3.54822	-3.23131	-3.31812	-3.49705	-3.64264	-4.02243	-3.80137	-3.87506	-3.38943	-3.8863	-3.79284	-4.06332	-3.94024	-3.64406	-3.97223	-3.36999	-2.75062	-3.31574	-2.92153	-3.40264	-2.82861	-3.43108	-3.24282	-3.60586	-3.15873	-3.15679	-3.13081	-3.43844	-3.4524	-3.50022	-3.40847	-3.13285	-3.17494	-3.4093	-3.00036	-3.29459	-3.29773	-3.64288	-3.17126	-3.39908	-3.58288	-3.22147	-3.0033	-3.39049	-3.17506	-3.26017
YMR186W	4.84904	4.60851	4.78357	4.69669	4.7057	4.78153	5.18627	5.42558	5.24819	5.36893	5.18391	5.03081	5.13686	5.4035	5.45851	5.01133	5.3642	5.35208	4.89752	5.28301	4.76601	4.72346	4.57365	4.5875	4.75938	4.93794	4.84643	5.32372	4.87299	4.97437	5.3511	4.95474	4.74116	4.05582	5.17172	5.16369	4.64157	4.91056	4.81107	5.01252	5.62595	5.10621	4.87284	4.77653	5.60385	5.61559	5.56885	5.74018	5.32947
YCR065W	0.92945	0.88782	0.96501	0.98659	1.04299	1.01337	1.023	0.89503	0.5855	0.76486	0.92278	1.04752	1.15152	1.4399	1.40106	1.06749	1.47027	0.96361	1.14727	0.60233	1.11344	1.42403	1.32062	1.24153	1.17269	0.94633	1.01763	0.93276	0.91987	1.24244	0.9922	0.80646	0.93829	0.90661	0.69452	0.92081	1.31161	0.72086	1.41703	1.3643	0.70306	1.25803	1.17036	1.07562	0.72326	0.70344	0.84643	0.94728	0.49534
YFL045C	3.29081	3.015	3.08599	3.31902	3.39169	3.0537	3.97492	3.78716	3.96025	3.65489	3.75907	3.48413	4.71113	4.61498	4.76462	4.40638	4.96244	4.59659	3.29068	3.35496	3.51165	3.4173	3.48294	3.59699	3.447	3.07372	3.83558	3.59905	3.18697	3.46426	3.94025	2.31111	2.53151	1.31465	3.48757	3.45618	3.1877	2.97372	3.46633	3.52504	3.31056	3.33577	3.53773	3.3785	3.28371	3.4862	3.70785	3.34831	3.4596
YOR388C	-4.11125	-3.78178	-3.71606	-3.90635	-4.07604	-3.74724	-3.50026	-3.40057	-3.80432	-3.4767	-3.69082	-3.31431	-4.22489	-4.23115	-4.30538	-3.87406	-4.45451	-4.28164	-3.33067	-2.9928	-3.30628	-3.24021	-2.46072	-3.07688	-3.59046	-3.22732	-3.22233	-3.26169	-2.12309	-3.085	-3.58644	-3.6919	-3.49167	-3.03483	-3.40643	-3.15154	-3.23219	-2.86546	-2.90731	-3.13166	-3.5059	-3.60282	-1.97191	-1.58658	-3.63887	-3.13272	-3.83089	-3.69443	-1.74329
YLR002C	-2.24352	-1.60907	-1.55946	-1.5865	-1.53548	-1.76929	-1.72003	-1.96278	-1.57998	-1.88385	-1.9654	-1.21745	-1.37622	-1.62612	-1.51705	-1.41864	-1.68073	-1.707	-1.29477	-1.52457	-1.75381	-1.974	-1.97293	-0.76834	-2.11719	-2.11591	-1.66694	-2.36633	-1.52275	-1.23484	-2.087	-1.51337	-1.50031	-1.3124	-1.38723	-1.12125	-1.53576	-1.66968	-1.42898	-1.11158	-1.63252	-1.48017	-1.5973	-1.25297	-1.677	-1.55054	-1.72075	-2.21988	-1.59767
YPR091C	1.82131	1.60792	1.72419	1.6658	1.69515	1.96273	1.90457	1.91462	1.87024	1.88096	1.85756	1.7662	1.50416	1.59293	1.70734	1.34958	1.65434	1.65461	1.42452	1.6945	1.84899	2.17889	1.92446	1.41355	2.05293	2.41088	1.87586	1.84162	1.58132	1.5356	1.51046	1.53234	1.29506	1.02212	1.46497	1.63227	1.93029	1.9639	1.7913	1.59641	1.79595	1.85596	1.49845	1.38969	1.88075	1.73468	1.84524	2.16598	1.60246
YOL083W	-0.85045	-0.48635	-0.73636	-0.84336	-0.38253	-0.58887	-0.12409	0.2766	-0.21268	0.16969	-0.23013	-0.21913	-1.68224	-1.54151	-1.64225	-1.57432	-1.35503	-1.84242	0.02999	-0.57654	0.77765	0.13235	0.19941	-0.03509	0.17611	0.53191	0.4789	0.12907	-0.25669	-0.05835	0.19787	0.08815	-0.63121	-0.87753	-1.43115	-1.35751	-0.01679	-0.46617	-0.58067	-0.62743	-0.45802	-0.62655	-0.31091	-0.00546	-0.02262	0.30361	-0.27494	0.36064	0.38435
YDR366C	-2.74736	-3.30071	-2.78682	-2.4098	-2.30669	-2.41651	-3.42856	-3.17662	-3.38624	-4.07148	-3.47392	-4.34781	-3.00333	-2.5227	-2.97533	-2.15284	-2.8217	-1.82352	-2.2356	-2.41256	-2.54286	-2.40355	-2.20642	-2.57112	-3.09963	-3.13041	-2.1974	-2.40846	-2.53902	-3.48704	-3.91217	-2.7637	-1.68489	-0.95315	-2.97408	-3.08001	-2.50187	-2.78438	-2.96787	-3.51245	-3.48907	-3.39237	-2.21852	-2.44478	-3.35696	-3.47239	-3.00927	-2.85526	-2.99764
YLR307C-A	-3.08556	-3.16839	-3.4231	-4.12021	-3.79509	-3.70712	-4.56491	-4.7547	-4.59203	-4.74783	-4.81852	-4.45705	-4.7067	-4.29367	-3.97577	-4.67883	-4.81407	-4.49446	-2.76961	-2.63298	-4.22725	-4.10608	-2.45056	-3.13905	-3.38443	-3.33713	-4.05597	-4.35331	-3.11397	-3.42509	-3.57136	-2.41106	-3.70026	-3.75237	-3.32246	-2.56403	-3.57036	-3.39772	-2.8281	-2.34533	-4.12755	-4.19636	-3.46866	-4.24053	-3.49501	-3.43737	-3.38451	-4.22576	-3.93148
Q0065	2.68398	0.68611	2.83075	2.86545	1.31402	3.11597	3.14118	3.07864	3.74675	2.31028	2.07342	1.58089	-2.55807	-2.23578	-3.2915	-3.71024	-3.55576	-3.19668	0.06586	3.94264	1.20933	1.79377	0.86608	1.70682	1.5686	2.57652	0.93566	2.47208	1.60054	1.84677	1.77945	-0.66719	-1.5137	-1.08233	0.89949	2.5711	1.04652	0.93531	1.63061	2.90396	2.7785	2.23921	1.16418	-0.07436	2.45376	2.6299	0.87502	3.41239	1.47746
YER190C-A	-1.55527	-1.73588	-2.13298	-1.52126	-0.34172	-2.08232	-0.83588	-1.55528	-0.8446	-1.52777	-1.28421	-1.15066	-2.66609	-2.13844	-2.79082	-2.99302	-3.19505	-3.98592	-1.87051	-2.24574	-1.61355	-1.99392	-0.67347	-2.12512	-1.26869	-1.06137	-1.04247	-1.25069	-2.32364	-2.59625	-1.67116	-1.11384	-0.70038	0.40551	-1.35804	-1.73389	-1.79406	-2.1592	-1.77117	-2.11865	-1.8329	-1.59288	-1.89284	-0.27118	-1.4523	-2.26939	-2.56716	-2.02082	-2.23608
YDR545C-A	-1.58995	-1.60524	-1.51603	-1.47166	-1.01607	-1.89783	-1.05328	-1.38108	-0.83222	-1.27988	-1.13626	-1.17261	-3.39124	-3.04832	-3.68217	-3.09383	-3.40143	-3.99788	-1.26863	-1.96511	-2.33131	-2.1671	0.04452	-2.10579	-0.88593	-0.37075	-1.62692	-0.88231	-1.97272	-1.73054	-1.04287	-0.91994	-0.75013	0.48859	-1.92747	-1.87949	-1.54217	-1.69298	-1.13028	-2.70536	-2.02522	-0.82562	-0.51197	0.20999	-1.71309	-1.85666	-2.71434	-2.10112	-1.84114
YNL020C	-0.41503	-0.49418	-0.35471	-0.31226	-0.36289	-0.30292	-0.52587	-0.45559	-0.76333	-0.62721	-0.53682	-0.48618	-0.88191	-0.88078	-0.98708	-0.8843	-0.66255	-0.70275	-0.21171	-0.56202	-0.38904	-0.53363	-0.5059	-0.87502	-0.56637	-0.63328	-0.41158	-0.51137	-0.21582	0.18236	-0.61955	-0.38667	-0.44275	-0.27323	-0.09734	-0.48216	-0.26402	-0.51152	-0.61355	-0.99838	-0.70373	-0.41758	-0.2969	-0.23839	-0.43522	0.03874	-0.64482	-0.46816	-0.50876
YGL125W	0.36453	0.47409	0.08113	0.27202	0.15547	0.25215	1.63092	1.76217	1.71769	1.69119	1.71528	1.42301	1.08578	0.81961	0.50531	0.89833	0.96582	0.51787	2.37058	1.96301	1.80322	2.08456	1.97719	1.31129	1.54166	1.3897	2.96181	3.06115	0.16199	0.68913	3.13719	2.39728	1.92378	2.17951	1.32796	1.14386	1.53257	0.83921	0.4966	0.04617	1.53064	2.00498	0.5888	0.88609	1.46652	0.68917	2.03921	2.34143	1.1596
YKR038C	0.16061	0.30981	0.14622	0.25659	0.20822	0.02033	0.50115	0.20018	0.4193	0.32382	0.52844	0.40775	0.54192	0.52063	0.53297	0.78288	0.51079	0.73338	0.93389	0.71894	0.28342	0.23249	0.58442	0.47436	0.50041	0.46294	-0.24094	0.17666	0.52321	0.32617	0.13879	0.67166	1.05951	1.10628	0.75588	0.34745	0.59181	0.55573	0.65694	0.68677	0.20791	0.52091	0.18719	1.01532	0.3538	0.24796	0.69225	0.09021	-0.02864
YDL215C	1.25636	1.3577	1.33806	1.48679	1.41264	1.55572	1.67254	1.86195	1.7528	1.6527	1.47036	1.63838	0.8382	1.28616	1.39266	1.04154	1.35971	1.37515	1.39625	1.56222	1.92983	1.49771	1.11533	1.26077	1.53037	1.35033	1.76588	1.44018	1.29383	0.97604	1.31759	1.19798	1.21415	0.67434	1.43262	1.61547	1.90665	1.85559	1.25142	1.36933	1.50792	1.39856	1.26002	0.67458	1.89967	1.36662	1.69211	1.87097	2.00344
YCR022C	-2.30181	-2.56495	-2.61398	-2.73132	-2.89598	-2.88668	-2.23711	-2.42353	-2.18655	-2.82322	-2.27766	-2.12622	-1.92451	-1.80925	-1.39524	-1.19985	-2.27685	-1.88306	-2.47771	-2.58945	-2.7363	-2.18821	-1.88697	-2.56746	-2.52042	-1.79496	-2.5137	-2.34674	-2.4464	-2.36037	-2.82947	-2.30762	-1.90557	-0.90412	-2.35966	-2.27336	-2.20945	-2.49772	-2.37722	-2.48064	-2.60201	-2.55053	-2.23066	-1.39215	-2.60056	-2.5056	-2.87143	-2.95417	-2.64258
YLR354C	3.52544	3.51668	3.51954	3.69493	3.64638	3.67595	4.1307	4.25829	3.73636	4.11285	3.95675	4.0799	4.55584	4.91319	4.8663	4.52463	4.75284	4.83718	4.01003	4.02326	3.80809	3.73454	3.45836	3.65114	3.72155	3.62081	4.59727	4.08818	3.56457	3.51746	4.65552	3.86518	3.97417	3.29775	4.46275	4.14199	3.87305	3.77569	3.79733	3.86238	3.92449	4.158	4.25288	3.51148	4.0069	3.58672	4.05576	4.04039	4.0836
YFR008W	-0.95089	-0.3854	-0.90323	-0.62415	-0.80591	-0.55939	-0.66658	-0.17448	-0.51817	-0.04278	-0.33296	-0.45492	-0.89529	-0.79348	-1.03207	-0.71845	-0.83606	-1.43521	-0.60921	-0.45702	-0.31395	-0.80871	-1.79079	-0.76701	-0.9863	-0.96215	-0.78833	-0.97852	-1.09361	-1.15958	-0.10075	-0.6527	-0.06049	-0.26074	-0.73065	-0.8646	-0.625	-0.51777	-1.5389	-0.92052	-0.71333	-1.75206	-0.89044	-0.61162	-0.4866	-0.733	-0.45416	-0.55947	-0.47902
YDR284C	1.86245	1.93582	1.56173	1.95407	1.84636	1.73412	1.61434	2.02794	1.89316	1.78023	1.73924	1.7163	1.68437	1.74337	1.79584	1.85246	2.11217	2.01437	1.35403	1.32286	1.55287	1.89491	1.83354	0.97728	1.99267	1.79792	1.76976	1.99133	1.8914	2.00778	1.87353	1.28756	1.66354	0.59349	1.64706	1.341	1.72698	1.869	1.55039	1.24062	1.78285	2.03099	1.71182	2.19483	1.59141	1.55383	2.22984	1.89005	1.58429
YFL013C	-0.14713	-0.31582	-0.24296	-0.26937	-0.25971	-0.11123	-0.5908	-0.44665	-0.15481	-0.3965	-0.19865	-0.38812	-0.49115	-0.6263	-0.51464	-0.76486	-0.85231	-0.80171	-0.70806	0.06196	-0.12968	-0.35344	-0.837	-0.02292	-0.51174	-0.71162	-0.21632	-0.61759	0.03157	-0.12606	-0.67838	-0.10319	-0.21575	0.08763	-0.28955	-0.09636	-0.68588	0.0539	-0.65096	0.12871	-0.27889	-0.75161	0.12461	-0.55225	-0.24014	0.09553	-0.64334	-0.81397	-0.23092
YKL051W	0.36794	0.31674	-0.06734	0.01695	0.33396	0.08658	1.98364	2.42664	2.00221	2.32647	2.02948	2.34557	1.99914	1.69169	1.58438	1.53042	1.71032	1.84734	-0.2462	-1.24424	1.68687	1.8148	2.19428	0.74005	2.02955	2.33252	1.87844	2.15253	-0.24888	0.77623	2.06508	1.1718	1.32063	1.37951	-0.35177	-0.35088	1.93385	1.79094	1.82634	0.8473	1.78843	2.32479	1.75885	1.65676	1.60543	0.26982	1.46862	3.24797	1.75003
YPR174C	0.4192	0.83512	0.34107	0.73825	0.26161	-0.02768	-0.7829	-0.73562	-0.65155	-0.92902	-1.03794	-0.77192	-0.55588	-0.63988	-0.68729	-0.48298	-1.15309	-0.67509	0.02174	0.24546	-1.01514	-0.97397	-0.30367	-0.67033	-0.52963	-0.266	-0.9267	-0.68182	0.47728	0.34387	-0.94997	0.22487	0.17536	0.90174	0.76748	-0.18894	-0.79513	-0.21737	-0.24998	-0.63649	-0.43654	-0.46399	0.26023	0.52164	-0.8242	0.11576	-0.37197	-1.12607	-0.41686
YJL143W	2.55238	2.52278	2.3536	2.7993	3.0085	2.20326	3.08381	2.96031	2.88258	2.85483	2.81863	2.99141	3.68422	3.44684	3.44455	3.19972	3.15349	3.1856	2.9261	2.01184	2.7818	2.91488	3.32867	2.84564	3.01805	3.03769	3.28449	3.12401	2.4539	2.85008	3.48084	3.39382	2.89131	3.64154	3.16342	2.54556	2.97757	2.6596	3.1373	2.43639	3.06817	3.41099	3.00171	3.64939	2.74496	2.78672	3.4169	2.72465	2.81413
YDR112W	-4.41616	-3.84792	-4.73173	-4.38137	-4.00982	-4.48844	-5.09595	-4.6507	-4.22669	-4.94854	-4.67408	-4.82837	-5.24489	-4.87856	-4.70739	-5.26401	-4.86758	-5.20757	-3.68187	-4.28533	-3.46285	-4.19633	-3.79251	-4.50136	-3.84065	-4.56082	-3.80031	-3.72251	-2.94745	-3.67849	-3.87462	-3.75169	-4.53908	-3.46069	-3.34112	-3.82957	-3.47823	-4.21119	-4.00314	-4.34669	-4.35479	-4.18552	-4.49194	-4.50414	-4.01631	-4.01282	-3.9283	-3.80218	-4.68771
YMR091C	0.68908	0.42192	0.44539	0.44936	0.38786	0.63499	0.2749	0.43895	0.48167	0.36622	0.43031	0.20564	0.6102	0.2488	0.61333	0.13993	0.42677	0.28805	-0.18739	0.42912	0.52332	-0.00175	-0.1233	0.41515	-0.02508	-0.13561	0.48441	0.39632	0.68831	0.36186	0.12606	-0.0593	0.11241	-0.1341	0.14304	0.49362	0.18163	0.21042	-0.07399	0.8335	0.28388	-0.4135	0.23854	-0.28507	0.47359	0.23424	0.4507	-0.07101	0.3885
YGR057C	-1.76393	-1.24102	-1.93757	-1.65602	-1.89793	-1.39723	-1.20945	-1.13339	-1.14199	-1.17329	-1.06402	-0.98124	-1.08969	-1.17668	-1.00227	-0.82934	-1.08573	-0.42087	-1.89875	-1.60819	-1.39486	-1.83614	-2.50151	-1.68584	-1.60821	-1.79496	-1.65529	-1.87068	-1.84668	-1.40995	-1.1893	-1.27775	-1.1883	-1.33218	-1.48206	-1.49694	-0.98591	-1.14958	-1.85011	-1.35828	-1.2032	-1.50896	-1.80397	-1.86652	-1.67718	-1.34335	-1.61601	-1.47028	-1.73902
YKL194C	-0.56443	-0.53541	-0.59745	-0.3565	-0.25459	-0.29524	0.33341	0.55517	0.30351	0.44241	0.42994	0.27028	0.33007	0.60485	0.62556	0.69915	0.74736	0.41308	-0.27675	-0.63109	0.00533	0.16634	0.3816	-0.08891	-0.36499	-0.24449	-0.08968	-0.08642	-0.66641	-0.80264	0.03925	0.31855	-0.33223	0.31634	-0.51433	-0.36404	0.1308	-0.198	-0.08628	-0.14649	0.06729	0.17173	-0.55048	-0.13909	-0.29694	-0.31686	0.1564	0.39056	-0.32207
YLR308W	-4.44328	-4.50304	-4.80444	-4.99996	-5.05071	-4.63938	-5.11607	-4.95874	-5.15578	-4.90281	-4.82658	-5.09904	-4.87961	-4.38719	-4.81351	-5.22728	-4.87869	-4.17641	-4.00364	-4.00762	-4.40302	-4.0796	-4.39212	-3.92087	-4.3069	-4.1296	-4.43018	-3.79662	-3.8682	-3.74907	-4.24096	-3.99595	-4.21354	-4.21556	-4.32134	-4.14451	-4.31063	-3.87593	-4	-3.9453	-3.87836	-3.748	-3.93585	-4.27281	-4.13529	-4.02653	-3.86892	-4.02031	-3.73938
YBR065C	-0.75436	-0.63903	-0.46351	-0.6798	-0.32759	-0.67642	-1.11978	-1.04322	-1.07617	-1.02005	-1.16734	-0.70027	-1.60751	-1.24439	-1.3565	-1.23773	-1.71586	-1.62719	-0.55357	-0.54422	-0.37202	-0.6125	-1.24497	-1.02876	-0.82213	-1.0369	-0.36973	-0.79557	-0.43788	-0.66892	-0.56649	-0.43298	-0.40523	-0.09683	-1.04336	-0.86109	-1.24161	-0.71103	-1.23935	-1.1721	-0.65784	-1.05427	-0.49928	-0.60889	-0.67481	-0.49409	-0.3541	-0.519	-0.69404
YMR029C	0.46726	0.40089	0.70131	0.46613	0.38186	0.551	0.21436	0.47057	0.45969	0.28236	0.61755	0.09206	0.04925	0.15792	0.17925	0.02483	0.3379	0.13759	0.1462	0.81943	0.44963	0.21206	-0.35182	0.16374	0.17029	0.29984	0.02152	0.45379	0.55082	0.25047	0.38167	0.19557	0.31499	0.20046	0.25167	0.45442	-0.03486	0.70205	-0.30414	0.41558	0.4093	-0.20475	0.25272	-0.02448	0.65211	0.42896	0.67529	0.57297	0.6436
YHL042W	-2.58156	-2.53987	-2.55476	-1.91028	-2.13997	-2.47671	-0.7829	-0.97455	-1.02269	-0.78978	-0.96945	-0.48618	-1.89207	-2.10206	-1.77929	-1.23938	-1.62278	-1.4389	0.44863	-0.58568	-0.66667	-0.92568	-1.76152	-2.31096	-1.56032	-1.60788	-0.13086	-0.05424	-1.37604	-1.00827	-1.25736	-1.58887	-2.60026	-2.3094	-1.76274	-1.93339	-2.02052	-2.64792	-2.28675	-2.43367	-0.82528	-0.52023	-2.1086	-2.08441	-2.20036	-1.34533	-0.71595	-1.05762	-0.86586
YLR156C-A	-3.57791	-4.64633	-3.69916	-3.87868	-2.57978	-3.91638	-3.33129	-3.52271	-3.18738	-4.2842	-4.2377	-3.36637	-3.63453	-3.49897	-4.11329	-4.468	-3.7039	-4.77762	-1.34334	-3.37336	-1.75989	-2.93892	-3.04754	-2.85839	-3.06545	-3.44652	-1.18567	-2.94201	-1.83369	-3.38	-0.88306	-2.82764	-1.06639	-2.66617	-1.33656	-2.41827	-1.27874	-1.98473	-3.01815	-3.45884	-2.58411	-2.63299	-1.29688	-2.12379	-2.95041	-2.65429	-1.82983	-3.20834	-1.22246
YNL068C	-0.42266	-0.15768	-0.48862	-0.68596	-0.31878	-0.26153	-0.4114	-0.61406	-0.45773	-0.434	-0.53951	-0.31123	-0.18621	-0.31214	-0.23398	-0.39382	-0.51366	-0.30536	0.03403	0.11398	0.00269	-0.25051	-0.53202	0.75919	-0.3294	-0.49015	-0.16875	-0.71382	0.16018	-0.31281	-0.66058	-0.3778	-0.05237	-0.45385	-0.35666	0.0252	-0.2176	0.01021	-0.23996	0.66069	-0.33105	-0.40589	-0.33952	-0.32326	0.11558	-0.3287	-0.03717	-0.47026	0.12394
YPR121W	-1.7676	-1.54438	-1.52092	-1.65358	-1.4236	-1.55454	-1.72609	-1.72203	-2.03576	-1.73341	-1.84311	-1.79678	-2.10268	-1.90586	-2.1017	-1.65584	-2.04038	-2.22841	-0.63751	-1.30454	-1.11637	-1.16261	-0.6583	-0.80222	-0.91461	-1.09102	-1.12453	-1.02816	-0.86744	-1.4647	-1.38011	-0.84118	-0.73627	-0.48331	-1.00055	-1.47635	-0.6183	-0.90957	-0.90567	-0.96129	-1.65531	-1.59685	-1.46868	-1.17063	-1.5906	-1.54595	-1.52606	-1.30437	-1.30719
YGL178W	1.97833	1.72476	1.67649	1.6216	1.07914	1.68101	2.07521	1.6209	1.9698	1.69506	1.90794	1.89175	1.90269	1.6444	1.78526	1.70895	1.88467	1.8104	2.12134	2.10833	1.90879	1.83426	1.9274	1.52314	1.86059	1.95078	1.75149	1.66996	1.90696	1.99257	2.05772	1.37828	0.98396	0.79175	1.95603	2.10634	1.65293	1.6369	1.86727	1.73735	2.00144	1.98158	1.97191	1.38538	1.65684	1.92622	1.30922	2.02228	1.90173
YGL157W	1.70519	1.61254	1.81131	1.75246	1.64539	1.82249	1.4658	1.56698	1.37993	1.47012	1.49829	1.32441	1.17242	1.41863	1.53667	1.42021	1.55611	1.48637	1.01922	0.83752	1.32796	0.96585	0.47969	0.66259	1.48349	1.88586	1.05644	1.05838	1.60708	1.41557	1.07109	0.95609	0.86925	0.87515	1.45609	1.26626	1.05813	1.18928	1.36321	1.38224	0.80849	0.44137	1.9994	1.29953	1.64209	1.69124	1.58616	1.9963	1.28032
YMR148W	1.90186	2.10592	1.60152	1.54569	2.31409	2.19807	2.16908	2.00381	1.78226	2.21602	2.06355	1.88727	2.11604	2.10871	1.82824	2.35196	2.0984	2.08536	1.9703	1.44922	2.45207	3.02174	2.94845	2.17694	2.64145	2.78202	2.3636	2.84658	1.18708	1.70754	2.65378	2.22256	1.90981	2.63613	1.08874	1.1021	2.46682	2.21302	2.18373	1.83973	2.32856	2.27268	1.88623	2.59921	2.37182	1.51857	2.84572	2.75904	2.11842
YML058W	3.57413	3.19984	3.36182	3.47282	3.64942	3.3332	4.16405	3.58851	4.11183	3.92311	4.20366	3.62324	4.59428	3.96426	4.21906	3.79344	4.50041	4.04037	3.98007	3.46145	3.71542	3.97986	3.87636	3.46155	3.6998	4.09456	3.77752	4.08124	3.56484	3.74803	4.33137	2.59972	3.17035	1.79412	3.89161	3.58585	3.70809	3.43303	4.07907	3.88094	3.5834	4.64699	3.80379	3.89211	3.56644	3.41229	3.95226	3.80435	3.71111
YGR019W	1.64785	1.75608	1.77261	1.75373	1.91207	1.93795	2.06266	2.40068	1.90486	1.99387	1.99984	1.99405	1.60235	1.66706	1.68945	1.81797	1.89149	1.90241	2.69354	2.44419	2.9533	2.70554	2.10809	2.06562	2.32021	2.41541	2.61281	2.03544	1.95301	1.1555	2.07926	1.83646	2.41911	2.06907	2.2743	1.93619	2.15905	2.19713	2.31357	2.28659	2.24069	2.16852	1.52193	1.70989	2.26147	1.58416	2.84608	2.86752	2.17791
YLR249W	3.47461	3.21328	3.52927	3.41483	3.48555	2.99732	4.86757	4.06307	4.63594	4.23627	4.70426	4.51042	5.18025	5.07868	5.2108	5.34937	5.47763	5.25103	4.3672	3.78707	3.429	3.52782	4.393	4.31805	4.15434	3.50643	4.01728	3.57989	3.8267	3.77465	4.73498	4.5547	3.73105	3.88331	4.27936	4.09515	3.84895	3.53116	4.30054	4.22149	4.57832	4.50555	4.0015	4.09472	3.52359	3.54814	4.58851	3.72117	3.90354
YBR263W	1.53082	1.54041	1.76283	1.75852	1.86007	1.62363	2.32796	2.22451	2.18372	2.20715	2.34519	2.4643	2.79741	2.90481	3.0334	3.05719	2.95031	3.11651	2.26338	1.79828	1.89334	1.99085	2.33349	2.3108	1.84879	1.69035	1.9704	1.66962	1.71731	2.00349	2.37113	2.29474	1.97586	2.165	2.13189	1.91939	2.23584	1.69681	2.27316	2.19676	2.21802	2.2985	2.03109	2.24422	1.72831	1.8228	2.526	1.59419	1.82172
YJL049W	-1.10388	-0.90481	-0.82929	-0.98828	-1.34356	-1.11097	-1.57889	-1.31114	-1.62405	-1.24321	-1.38596	-1.50503	-1.49772	-1.87449	-1.68988	-1.73894	-2.10193	-1.53578	-2.12731	-1.05736	-1.47743	-1.34582	-2.00841	-1.36998	-1.40515	-1.22155	-1.43759	-1.056	-1.13472	-1.39058	-0.95009	-1.5791	-1.4082	-1.65752	-1.87443	-1.4725	-1.97192	-1.29063	-1.85794	-1.30366	-1.0591	-1.7885	-1.11145	-1.3343	-1.36208	-1.30721	-1.72688	-1.65306	-1.45916
YOR249C	-1.09694	-0.80508	-0.97296	-0.93034	-1.04649	-0.99504	-1.40338	-1.13728	-1.28081	-1.26766	-1.38078	-1.24387	-1.68483	-1.49347	-1.57787	-1.35698	-1.55977	-1.59771	-1.14637	-0.81877	-0.99075	-1.20355	-1.69596	-1.19359	-1.48165	-1.23145	-1.49534	-1.18665	-0.90155	-1.20768	-1.17306	-1.04675	-1.20064	-1.36255	-1.24689	-1.07461	-1.08782	-0.96397	-1.55338	-1.36789	-1.12453	-1.44312	-1.21997	-1.02826	-0.95717	-1.04047	-1.34261	-0.79434	-0.89697
YBL097W	-1.28904	-1.05507	-1.04249	-1.30567	-1.28752	-1.07888	-1.51663	-1.44594	-1.22623	-1.30084	-1.44739	-1.53729	-0.85603	-1.12243	-1.16509	-1.19024	-1.1437	-1.31836	-1.68114	-1.06103	-0.9935	-0.83582	-1.73255	-0.69144	-1.62353	-1.17383	-1.20958	-1.49706	-1.32084	-1.22239	-1.8005	-1.39323	-1.28805	-1.08643	-1.24482	-0.87335	-1.45849	-0.97966	-0.90329	-0.79108	-0.98457	-1.07892	-1.0209	-0.76339	-1.13323	-0.89644	-1.60469	-1.52647	-1.22778
YCR020W-B	-0.13288	-0.27423	0.04994	0.34064	-0.24797	0.00135	1.10328	1.00087	0.87108	1.04522	1.07936	0.41337	0.28497	-0.09505	0.18616	-0.32687	0.11576	-0.24138	0.5761	1.74084	-0.39762	-0.96302	-0.11954	0.80795	0.64128	1.02046	0.19557	0.75506	0.70941	0.24174	0.54363	-0.7896	0.04929	-1.14265	-0.15287	-0.14121	0.45822	1.18596	-0.80842	0.04878	0.08423	-0.53335	0.55351	-0.35998	0.34103	0.92651	0.55197	1.11682	0.02458
YDR286C	-0.82776	-0.79704	-0.86738	-0.9799	-1.04603	-0.74253	-1.21639	-1.02581	-1.2676	-0.75844	-1.10621	-0.87611	-0.67043	-0.63729	-0.73015	-0.5427	-0.87177	-0.73106	-1.11283	-1.29633	-1.2957	-0.84487	-1.06345	-1.34749	-0.18309	-0.50091	-1.32468	-0.8838	-1.19828	-1.35891	-0.39696	-0.81832	-0.68303	-0.75573	-1.54396	-1.60994	-0.65685	-0.68685	-1.43973	-1.36865	-0.67816	-1.05808	-1.25062	-0.74444	-0.93839	-1.56094	-0.88183	-0.2779	-1.22681
YPR044C	-4.32872	-4.90991	-4.91192	-4.86751	-4.05837	-4.46473	-4.46411	-5.17365	-4.59203	-4.85919	-4.40127	-4.91048	-4.74119	-4.3834	-4.69237	-4.7271	-4.41198	-4.98778	-4.44987	-3.93996	-4.03389	-4.18017	-3.9945	-4.36457	-3.87264	-4.31728	-4.05597	-4.06361	-3.6316	-4.10427	-3.82888	-4.08222	-4.04413	-3.80577	-3.49601	-3.90167	-3.54335	-4.45624	-3.90049	-4.05888	-4.25163	-3.98417	-3.72477	-4.08787	-4.23192	-4.22624	-3.9283	-4.47389	-3.69247
YDR170W-A	4.74236	4.46641	4.74663	4.62633	4.55566	4.6966	-1.71261	-1.59226	-1.87345	-1.8312	-2.12527	-1.38955	0.90231	0.86231	0.71966	-0.32594	0.31435	0.17334	5.09659	5.16743	4.84201	5.07462	4.22659	4.93892	4.54072	5.02759	5.09046	5.00331	5.00499	3.87099	1.99855	2.65137	4.8565	3.90773	4.07236	4.12597	4.53662	4.7676	4.81174	5.08649	3.92228	3.84099	4.31457	3.11842	4.49597	3.89654	3.56549	3.73263	-0.20587
YBL043W	-3.18272	-3.06767	-3.24043	-3.07442	-3.12845	-2.98629	-1.20945	-1.07019	-1.86499	-0.97037	-0.78102	-1.49981	-2.21232	-2.10438	-2.14462	-1.88212	-2.38255	-2.21867	-2.1877	-2.55835	-1.34132	-1.85394	-2.02143	0.00227	-2.91513	-3.06762	-2.44244	-2.38084	-2.44011	-2.01201	-2.48287	-2.3972	-1.62335	-2.59047	-2.58785	-1.90673	-1.12606	-1.50882	-2.24398	-0.58118	-2.47258	-2.36751	-2.26552	-2.76548	-1.55743	-1.94892	-2.20863	-2.2212	-2.2122
YLR018C	0.91818	0.8779	0.74338	0.82423	0.65025	0.87667	0.88477	0.91375	1.08331	0.96203	0.98819	1.00449	1.29272	1.49061	1.62641	1.5344	1.55592	0.81692	0.97414	-0.04672	1.14783	0.93099	0.98094	1.03782	0.99845	1.15268	1.07423	1.01875	0.43026	0.97861	0.74925	1.27946	1.20463	1.44723	0.6968	0.70424	1.53667	1.10627	0.88027	0.64445	0.89347	0.86176	0.75709	1.18087	1.00934	0.99667	1.26697	0.68417	1.05032
YMR076C	-1.59288	-1.42259	-1.48193	-1.31584	-1.78272	-1.52017	-1.93723	-2.00101	-1.78474	-1.91846	-2.0759	-1.64464	-1.58157	-1.4766	-1.37659	-1.43766	-1.62213	-1.48354	-1.79561	-1.49854	-1.55203	-1.46322	-2.20257	-1.52369	-1.67518	-1.84381	-1.65119	-1.96739	-1.02225	-1.11192	-2.38067	-2.2105	-2.2337	-2.28941	-1.97737	-1.68009	-1.23938	-1.10405	-1.81098	-1.54249	-1.53157	-1.46133	-1.56424	-1.37159	-1.23952	-1.30957	-2.13518	-2.0752	-1.77407
YOR251C	0.02457	0.20864	0.26416	0.25352	0.27955	0.19229	0.72686	0.69827	0.30216	0.56427	0.5523	0.54191	0.37076	0.75174	0.74137	0.84092	0.75305	0.61258	0.42349	-0.00841	0.65225	0.6905	0.69268	0.28393	0.68632	0.33537	0.68697	0.53994	0.23118	0.65044	0.64818	0.7004	0.37376	0.44528	0.30649	-0.00528	0.97945	0.76746	0.55994	0.45414	0.7611	0.82672	0.35667	0.35919	0.44248	0.38845	0.5705	0.56495	0.48027
YAR070C	-3.28013	-3.29232	-2.3983	-2.58534	-2.93208	-3.02375	-2.78683	-3.29752	-2.89245	-3.40293	-3.49664	-3.72952	-3.49839	-3.86024	-3.39142	-3.67335	-2.88701	-4.07951	-1.94068	-2.298	-3.39013	-3.42388	-2.42802	-3.16598	-2.72298	-1.66568	-2.71894	-2.44057	-1.05579	-2.4804	-1.56945	-2.22914	-2.87746	-1.99955	-1.27083	-1.61334	-2.83048	-3.14973	-2.70743	-3.43442	-3.10239	-3.48938	-3.23663	-2.5637	-3.11323	-2.23275	-2.89661	-2.98334	-2.90392
YBR124W	-4.61304	-4.65329	-4.75152	-4.82771	-4.63562	-4.69915	-4.5147	-4.73329	-4.13938	-4.26271	-4.72468	-4.58596	-4.27479	-4.32447	-3.96186	-4.51593	-4.45451	-3.86884	-4.16314	-3.83611	-3.8006	-3.53473	-3.62593	-3.82024	-3.90684	-3.88719	-3.95778	-3.8991	-4.15185	-3.88331	-3.87882	-4.12086	-4.21199	-3.80038	-3.967	-3.97227	-3.88746	-3.84164	-3.71708	-3.56096	-3.78927	-3.717	-3.90858	-4.65309	-3.76224	-3.67483	-4.07641	-3.8725	-3.90872
YJR135W-A	0.54731	0.55178	0.58833	0.34768	1.01753	0.23951	0.91056	0.94767	1.06023	0.85835	1.07803	1.02424	1.4782	1.77622	1.68048	2.02322	2.10191	1.7937	1.26981	0.51498	1.00295	1.41897	1.4105	0.81326	0.79282	1.20435	1.10791	1.13884	0.65813	0.67097	1.60286	0.99054	0.67959	0.85805	0.62738	0.49255	0.98361	0.54909	0.95897	0.7533	1.09221	1.2174	0.87414	1.31827	0.69098	0.31141	1.70886	0.97711	0.92182
YOR186W	-2.32947	-2.33137	-2.22601	-1.85274	-1.72193	-2.33755	-0.57183	-0.68893	-0.68082	-0.57751	-1.10716	-0.87721	-1.1033	-1.24123	-1.5926	-0.82014	-1.30922	-0.90994	-1.93319	-2.23224	-0.98579	-0.47575	0.25778	-2.07975	-0.21388	0.52002	-1.30561	-0.97316	-2.21094	-2.12178	0.18581	-0.12729	-0.05237	-0.57652	-1.65417	-2.11415	-0.92823	-1.21357	-0.97963	-1.91691	-1.48306	-0.97624	-1.4468	-0.97936	-1.82625	-2.16003	-1.87025	-0.34601	-1.21761
YDR083W	-1.95856	-1.9408	-1.49006	-1.85997	-1.72193	-2.05393	-1.61741	-1.90068	-1.36941	-1.79469	-1.77014	-1.1173	-1.59891	-2.16457	-1.80751	-1.3408	-2.14337	-2.08999	-1.82998	-1.49893	-2.05305	-1.94201	-2.02143	-0.78905	-2.00726	-2.03854	-1.43002	-2.01035	-1.75667	-1.03704	-1.76803	-1.20032	-2.16136	-1.91721	-1.47268	-1.02657	-1.96168	-2.01781	-1.75401	-1.27567	-1.44499	-1.29891	-1.574	-1.61031	-1.83207	-1.46768	-1.90745	-2.46014	-1.97217
YOR011W-A	-3.85147	-3.96275	-3.92075	-4.83743	-4.23598	-4.51092	-4.8461	-4.73799	-5.06389	-5.33597	-4.47169	-5.10923	-4.8234	-4.74727	-5.68504	-5.60266	-5.07498	-5.29241	-4.24941	-3.78329	-4.50605	-3.86039	-3.76409	-4.52265	-3.95378	-3.92537	-4.08001	-3.91937	-4.12089	-4.2547	-4.04203	-4.32644	-3.65694	-4.37506	-2.68288	-4.3271	-4.05505	-4.19572	-3.629	-4.20867	-3.91119	-3.70533	-4.00558	-4.6554	-3.9377	-4.45	-3.76534	-3.652	-4.04692
YOR267C	2.88768	2.70262	2.90123	2.85032	2.04024	2.60161	2.40418	2.36043	2.44462	2.40372	2.35909	2.21798	1.90496	1.79186	1.93354	1.53064	1.97029	1.74143	2.27894	2.56125	2.13531	2.28212	2.55787	1.88737	2.62392	2.77073	2.31149	2.64248	2.94768	2.67561	2.36921	1.7185	2.15456	1.22609	2.3903	2.50374	2.15993	2.52263	2.37648	2.11076	2.42876	3.07292	3.13718	2.83957	2.3578	2.47573	2.29125	2.8735	2.57763
YLR109W	6.33916	6.01556	5.58973	6.17399	6.601	6.16185	6.52057	6.37185	6.29847	6.5661	6.53161	6.59698	6.54347	6.83968	6.76177	6.35745	6.5798	6.61145	6.12794	5.48487	6.26806	6.71104	6.39154	6.79475	6.10213	6.54239	6.52784	6.7904	5.75909	6.63978	6.71791	6.27004	6.04299	6.14784	6.14185	5.85259	6.20744	6.09277	6.30145	7.08362	6.74505	6.71116	6.65935	6.2981	6.98009	6.34494	6.8168	7.3337	6.76701
YOR032C	-3.55238	-2.79953	-3.22617	-3.17848	-3.51601	-3.18353	-1.80846	-2.02294	-1.99121	-2.15513	-2.2364	-1.93245	-1.75735	-1.8633	-1.84741	-1.2291	-1.7418	-1.85592	-1.64058	-1.76028	-2.84299	-2.87872	-2.31723	-1.68303	-2.38685	-2.32932	-2.95482	-2.81045	-1.10617	-2.03583	-2.76365	-1.36235	-2.45583	-3.03483	-2.45289	-2.01447	-2.24703	-2.10644	-1.9449	-1.76312	-2.35862	-2.06334	-2.60554	-2.0556	-1.49843	-1.71727	-2.30632	-1.18996	-2.23596
YOR091W	-0.6678	-0.74872	-0.56705	-0.82517	-0.65305	-1.00743	-0.7345	-1.19398	-0.3473	-0.70589	-0.57887	-0.57089	-0.21984	-0.84529	-0.89604	-0.47287	-1.08089	-0.9655	-0.63912	-0.77793	-0.42781	-0.97517	-0.62095	0.53711	-0.75443	-0.93231	-0.51037	-1.31108	-0.32924	0.01949	-1.10423	-0.13552	-0.29339	0.25337	-0.3983	-0.04835	-0.71396	-0.739	-0.40297	0.31056	-0.38568	-0.64906	-0.01365	0.06305	-0.5482	-0.45098	-1.09418	-1.65722	-0.3314
YKR059W	3.94088	3.86161	3.88713	3.76409	3.87476	3.76679	5.03409	4.79495	5.16444	5.08468	5.19825	5.06981	5.44967	5.33482	5.44567	5.47682	5.43673	5.53727	4.42514	4.12537	4.15174	4.36017	4.74984	4.45932	4.60382	4.08512	4.59489	4.18906	4.17743	4.69699	5.38111	4.52146	4.35456	3.67195	4.52674	4.45214	4.54414	4.18603	4.56222	4.37171	5.00518	5.4343	4.53361	4.74271	4.33103	4.37586	5.27611	4.776	4.58737
YBR205W	1.09571	0.96002	0.99235	1.15453	0.97493	1.13907	1.51611	1.50313	1.52522	1.40698	1.35989	1.40271	1.22891	1.64853	1.74567	1.16995	1.59831	1.34341	1.26727	1.31159	1.18674	1.1973	1.53809	1.30627	1.4221	1.33508	1.14079	1.22449	0.90204	1.29727	1.27354	0.38701	0.83135	-0.2158	1.12877	1.36505	1.15918	1.40565	1.60156	1.40595	1.31995	1.22164	1.29493	0.74123	1.10997	1.15291	1.27671	1.39187	1.10943
YLR316C	-1.82204	-1.12099	-1.45936	-1.67898	-1.33122	-1.58209	-1.70132	-1.72032	-1.70954	-1.631	-1.73579	-1.30245	-1.136	-1.37315	-1.67079	-1.23352	-1.38064	-1.64983	-1.80003	-1.70555	-1.54847	-1.87871	-1.59319	-0.79159	-1.46895	-1.63006	-1.51501	-2.10925	-1.86854	-1.60156	-1.82803	-0.91383	-1.04189	-0.50295	-1.44356	-1.34107	-1.40318	-1.35968	-1.30786	-0.81675	-1.55208	-1.66549	-1.40337	-1.29571	-1.5954	-1.49721	-1.50473	-2.1097	-1.5358
YDR406W-A	-3.64703	-5.15707	-3.47662	-3.77206	-3.92133	-3.9164	-4.18153	-3.47098	-3.47312	-3.71945	-3.46498	-3.59071	-4.10272	-5.04769	-5.02056	-4.00659	-4.39818	-4.62126	-3.51456	-3.27171	-3.65639	-3.49581	-3.31365	-2.78736	-3.20953	-3.36724	-3.71471	-3.92747	-3.44427	-3.78234	-3.44175	-3.9672	-4.36545	-4.15702	-1.88731	-3.19153	-3.64081	-3.93121	-2.80597	-3.64468	-3.0809	-2.95577	-3.09219	-3.57455	-2.11534	-3.33145	-3.77556	-2.7165	-4.25699
YLR292C	2.29322	2.20021	2.37757	2.32388	2.20553	2.13986	1.99118	1.93699	2.36802	2.03953	1.94712	1.95684	2.25258	2.36821	2.64986	2.24039	2.47258	2.63299	2.5985	2.57836	2.29623	1.95716	1.56286	1.90489	1.51646	1.86417	2.01923	2.05775	2.56312	2.37989	1.5897	1.62109	2.04245	0.49837	2.64066	2.47199	2.00129	1.82816	1.61126	2.2317	1.73672	1.18771	2.30422	2.00097	2.42696	2.5286	2.20882	1.6758	2.56067
YLR216C	4.29006	4.48352	4.29403	4.56607	4.35367	4.44132	3.70254	4.36613	4.01331	4.01223	3.89978	3.97039	3.8216	4.1148	4.18886	3.89349	4.45327	3.92655	4.33471	4.83626	4.14134	3.71238	3.1808	3.41459	3.83529	4.2107	3.98869	4.25553	4.44986	4.16457	3.89704	3.77998	4.06921	2.21671	4.76664	4.73133	3.90594	4.34179	3.79425	4.17854	3.99558	3.67984	3.74993	3.72507	4.39027	4.70489	4.72822	4.28247	4.48855
YCR044C	1.20997	1.44756	0.9714	1.63313	0.86262	1.18562	1.31496	1.50859	1.41085	1.30925	1.33106	1.11218	1.49583	1.55911	1.37455	1.64477	1.39572	1.30997	0.88969	0.72246	1.05258	1.32847	1.73377	0.79411	1.52331	1.55044	0.9785	1.33747	0.32669	1.16337	1.51176	0.49565	1.17005	0.53983	1.01645	0.80844	1.14828	0.93414	1.80539	0.90056	1.33814	1.79659	1.01166	1.47143	1.07234	1.00781	1.14387	1.2338	0.85631
YDR046C	1.36653	1.50491	1.32799	1.44845	1.56278	1.48712	1.5385	1.50643	1.71666	1.67164	1.81242	1.2381	2.34013	2.20982	1.88934	1.86735	2.3028	2.01721	1.37978	0.95787	1.37757	1.53862	2.06224	2.44869	1.70114	1.13151	1.38755	1.6796	0.95208	1.64208	1.66152	1.76462	1.50531	1.56235	1.63056	1.75074	1.74981	1.16658	1.87034	2.16298	1.90361	2.05979	1.74485	2.02378	1.57992	1.7684	2.04184	1.76501	1.33094
YGR069W	-2.74942	-4.10459	-3.03207	-3.67601	-3.7872	-3.49536	-3.11884	-3.38627	-3.21931	-2.126	-3.1326	-2.92988	-3.62984	-3.85417	-3.57243	-4.35559	-3.01901	-4.0021	-2.97394	-2.6884	-2.90115	-2.67034	-3.11601	-3.52889	-2.99928	-2.72332	-2.68721	-2.42982	-3.40389	-3.80908	-2.39665	-4.14088	-4.07912	-4.03404	-3.50609	-3.1795	-2.1028	-2.62631	-2.80217	-2.78606	-2.67757	-2.57666	-2.64224	-3.94265	-2.56493	-3.2955	-2.89888	-2.73447	-2.94702
YJL092W	-0.78835	-0.84496	-0.75714	-0.94401	-1.00848	-0.842	-0.94747	-1.00518	-1.04955	-0.90422	-0.9223	-1.06108	-0.98872	-1.01702	-1.02669	-1.29241	-1.0843	-1.24215	-0.80509	-0.70135	-0.76273	-0.30411	-0.48584	-0.51651	-0.54784	-0.47587	-1.1013	-1.11086	-0.77054	-0.82453	-1.12022	-1.22219	-0.94215	-0.78359	-1.06837	-1.00262	-0.85577	-0.70919	-0.19571	-0.37162	-1.03498	-0.72041	-0.87815	-0.89472	-1.07525	-0.87532	-1.39174	-1.12461	-1.05801
YDR096W	1.73783	1.68619	1.62859	1.76375	1.51005	1.85368	2.08175	2.11088	1.91211	2.06076	1.93096	1.93325	1.43318	1.53782	1.73484	1.65466	1.83515	1.70853	1.55258	1.61992	1.86801	2.0145	1.67606	1.19369	2.11665	2.10449	2.08663	1.9443	1.36449	1.66077	1.7582	1.09316	1.4752	0.87965	1.27876	1.53919	2.25986	2.1698	1.79946	1.57326	2.08398	2.19208	2.02907	1.42062	2.09164	1.74603	2.00734	2.30271	1.61394
YML018C	0.00328	0.07501	0.02411	-0.2451	0.00513	-0.35982	0.26376	-0.059	0.34774	-0.06124	0.27148	0.15477	0.89042	0.40322	0.29477	0.54567	0.43718	0.50302	0.42406	-0.81469	-0.22933	-0.12006	0.91106	0.27474	0.33901	0.0953	0.22907	0.46425	-0.56516	0.14355	0.55679	-0.0326	-0.23044	0.12643	0.17743	0.00349	0.11623	-0.39928	0.6018	0.30166	0.06122	0.77005	0.22853	0.78581	-0.23419	0.07591	0.45467	-0.31822	0.25596
YLR445W	-4.45649	-4.58172	-4.40415	-4.54412	-4.7766	-4.56765	-4.48649	-4.73703	-4.7374	-4.9105	-4.92305	-4.68904	-4.3202	-4.44357	-4.56844	-4.82945	-4.62804	-4.63091	-3.76654	-3.60632	-3.95725	-3.74722	-4.45687	-3.74658	-4.08082	-4.07492	-4.15655	-3.87807	-3.87053	-3.50279	-4.04927	-4.12327	-4.15711	-4.20352	-4.05602	-3.86563	-3.9103	-3.60158	-4.0104	-3.99933	-3.78103	-4.1804	-3.76277	-3.80907	-3.76079	-3.98775	-3.78647	-4.00613	-3.87832
YOR138C	0.67678	0.53837	0.53684	0.43191	0.72906	0.6712	0.54762	0.56784	0.7494	0.72182	0.77165	0.75065	0.38319	0.03165	0.19426	0.06672	0.07413	0.28181	0.77028	0.7781	1.08316	0.76957	0.50489	0.55577	0.71488	0.62899	0.46424	0.3643	0.71039	0.22889	0.2801	0.31418	1.23488	1.23202	0.62683	0.58671	0.76075	0.85614	0.92739	0.78046	0.66344	0.92374	0.60146	1.03774	0.62882	0.48949	1.00776	0.62852	0.89885
YOR369C	4.69203	4.49405	4.64996	4.70296	4.70979	4.37523	5.60258	5.15276	5.56699	5.49685	5.51426	5.40974	5.84124	5.59785	5.80942	5.73855	5.91387	5.91274	5.1958	4.52212	4.73369	4.62299	5.08653	4.72334	4.99347	4.74463	5.39525	5.46455	4.98561	4.94314	6.19719	5.36634	4.74818	4.90081	5.43289	4.8848	4.96776	4.54625	4.99523	4.6287	5.97753	6.0167	5.49115	5.73481	5.36654	4.97076	6.09638	5.96401	5.34347
YGR246C	-0.53363	-0.50517	-0.54824	-0.5801	-0.44287	-0.54034	-1.14949	-1.13362	-0.94987	-0.95112	-0.95474	-0.89817	-0.84278	-0.99209	-0.94498	-0.83127	-1.25925	-0.80406	-1.347	-1.00134	-1.00493	-0.88031	-1.48673	-1.34566	-0.72494	-0.43901	-0.80785	-0.86802	-0.85298	-0.66465	-1.22227	-0.65683	-0.82496	-0.67472	-1.16326	-1.22763	-1.35401	-0.89981	-1.04607	-1.03597	-0.87329	-1.09206	-0.53674	-0.48294	-0.84777	-0.62659	-1.2585	-1.56269	-1.13305
YJR145C	4.08675	3.89155	4.08146	4.00763	4.21875	3.89714	5.22956	4.76972	5.1445	5.21482	5.17365	4.89308	5.45007	5.51536	5.66346	5.72751	5.63314	5.66524	4.83549	4.39057	4.48018	4.04369	4.59747	4.86973	4.56338	4.32356	4.64344	4.37555	4.25146	4.19524	5.30348	5.16984	4.48251	5.05797	4.55183	4.55306	4.61564	4.22263	4.62042	4.71375	5.35554	4.70028	4.87798	5.04066	4.51518	4.3245	5.25389	4.99084	4.77522
YJR138W	-1.05061	-0.69155	-1.04366	-1.12871	-0.937	-0.98245	-1.31611	-1.15699	-1.36276	-1.2007	-1.44673	-1.34332	-1.47423	-1.31062	-1.42206	-1.1196	-1.44965	-1.3307	-1.11234	-0.95033	-0.71823	-1.04033	-1.44794	-1.05449	-0.99431	-1.08607	-1.21782	-1.41639	-0.98605	-1.13548	-1.55432	-0.86881	-1.00074	-0.82211	-1.36482	-1.18233	-0.99356	-0.75594	-1.31403	-1.24287	-0.93669	-1.1611	-1.26318	-0.8565	-0.96261	-1.09321	-0.90286	-0.91379	-0.92552
YHR059W	-0.55985	-0.86664	-0.34397	-0.84336	-0.72289	-0.70266	0.25576	-0.04651	0.27583	0.07997	0.10341	0.03029	0.39383	0.33455	0.5315	0.62034	0.46276	0.28961	-0.12731	-0.38033	0.177	-0.02907	-0.04155	0.38366	-0.48871	-0.74522	-0.20098	-0.30881	-0.39385	-0.31349	0.25271	0.15109	-0.44454	-0.67541	-0.25582	-0.09803	-0.2176	-0.32078	-0.23467	0.42161	-0.17041	-0.10735	-0.63756	-0.70188	-0.22625	-0.23126	-0.11361	0.45639	0.10254
YLR138W	1.16265	0.97921	1.035	0.9819	0.87137	0.88305	0.99631	1.1452	1.10186	1.13209	1.14348	1.13952	0.90619	0.7549	0.67258	0.61403	0.75433	0.54345	0.8848	0.97187	0.77166	1.36752	1.61071	0.68479	1.39764	1.64226	0.76105	1.50748	0.77611	1.44102	0.89517	0.56962	0.85375	0.45877	0.80601	0.85001	1.0174	0.95136	1.34272	0.57459	1.05025	1.45123	1.00456	1.15379	0.50485	1.01199	0.38961	0.95607	0.53918
YHL009W-B	-2.30797	-2.05626	-2.15773	-2.14499	-2.36829	-2.1536	-4.84429	-4.87759	-4.88674	-4.94854	-4.68453	-4.73324	-2.40307	-2.38348	-2.63381	-2.73358	-2.70144	-2.75388	-3.34993	-2.51953	-2.16675	-2.52504	-3.12975	-2.1104	-3.33887	-3.34228	-3.3562	-3.28445	-3.13664	-3.97349	-2.73849	-2.66686	-2.46555	-2.78308	-3.33149	-2.737	-2.88731	-2.47902	-2.70749	-2.0027	-2.93098	-3.49846	-2.37439	-2.53393	-2.66756	-4.02218	-3.47644	-3.13586	-2.41698
YNL156C	1.38408	1.55523	1.53356	1.81046	1.56422	1.65457	2.60699	2.55143	2.57374	2.45471	2.52185	2.52963	1.92763	2.09181	2.28913	2.19725	1.96108	2.09098	1.18834	1.75111	2.18072	2.36389	1.48276	1.11321	1.64463	1.77146	2.3396	2.56347	2.30694	2.251	1.67817	1.91961	1.37771	1.64298	1.3551	1.5205	1.62045	1.48935	1.71088	1.36363	2.06213	1.83545	2.27883	2.22777	2.31901	2.55064	1.69995	2.24557	2.31766
YNL106C	0.2004	0.28525	0.13605	0.00747	0.15035	0.33516	-0.13044	0.08839	-0.01728	-0.20022	-0.20358	-0.07831	-0.37737	-0.03283	-0.00902	-0.07576	-0.04409	-0.14499	0.01963	0.09504	-0.05714	-0.28776	-0.36944	-0.26556	-0.43141	-0.58227	-0.23905	-0.33731	-0.30156	-0.11012	-0.50454	-0.0825	0.13999	-0.14731	0.46785	0.36557	0.05528	-0.07953	0.00407	-0.07159	-0.10706	0.10227	-0.06804	0.12628	0.10924	-0.13107	-0.00344	-0.05057	0.10792
YNL286W	-1.36078	-0.92366	-1.23508	-1.08774	-1.39543	-1.63428	-1.31283	-1.53225	-1.1687	-1.34428	-1.32209	-1.60042	-1.11284	-1.31551	-1.42821	-1.14977	-1.45561	-1.48173	-1.80658	-1.06173	-1.34714	-1.05624	-1.7724	-0.86232	-1.52889	-1.51329	-0.99859	-1.24063	-1.44593	-1.34036	-1.166	-0.39456	-1.25037	-0.25637	-1.05129	-1.15014	-2.23229	-1.3088	-1.98566	-1.20965	-1.27098	-2.04327	-0.8534	-1.64564	-1.58955	-0.85463	-2.02523	-1.79636	-1.13011
YNL093W	-2.11267	-1.74085	-2.03615	-1.95369	-2.0305	-1.88245	-0.86498	-1.25781	-1.31466	-0.87688	-0.79173	-1.13081	-3.13885	-3.06657	-3.07103	-2.81695	-3.01574	-3.17252	-1.39608	-1.25864	-1.2343	-1.26462	-1.57325	-1.54586	-1.67157	-1.78697	-1.26863	-1.23094	-2.06679	-0.61748	-0.74635	-1.0041	-1.34542	-1.75838	-1.45008	-1.6355	-1.79045	-1.45899	-1.98017	-1.70133	-1.24587	-1.49802	-2.26552	-2.18505	-1.68437	-0.67912	-2.02839	-1.38794	-1.28986
YIL040W	1.3197	0.89272	1.08033	1.40701	1.09356	1.25519	1.00567	0.91697	1.18385	0.99997	1.06764	0.91386	1.42288	1.55925	1.43622	1.3969	1.32723	1.89942	1.29256	0.85346	1.31668	1.56928	1.59491	1.23881	1.43914	1.54289	1.75111	1.83873	1.28009	1.50175	1.54512	0.30995	0.72092	0.00732	1.04186	1.03821	1.17935	1.21486	1.42418	1.05029	1.41402	1.45904	1.3391	1.30062	1.26088	0.82918	1.18976	1.1979	1.18672
YKL104C	2.36517	2.55236	2.30557	2.49014	2.77914	2.61797	2.44392	2.7846	2.62673	2.58143	2.5793	2.73952	2.61171	2.8589	2.92999	2.93056	3.23095	2.79146	3.2439	3.22119	2.68051	2.67073	2.87706	2.77972	2.74808	2.48382	2.58266	2.26729	2.5452	2.4412	2.77042	2.53399	2.25082	1.84298	3.35418	3.20421	2.73567	2.75349	2.71154	3.07812	2.49023	2.62259	2.50492	2.46615	2.60588	2.82834	2.76278	2.84269	2.8189
YLR186W	0.13841	-0.04144	0.22361	0.10019	0.60985	0.39022	0.31368	0.44996	0.69038	0.51517	0.48709	0.63704	1.42739	1.33379	1.33639	1.21196	1.48029	1.11719	0.73721	0.04946	0.51792	0.20231	0.51157	1.23413	0.17911	0.12726	0.35076	-0.10854	0.51612	0.65819	0.13879	0.29917	0.83192	0.89399	0.50972	0.77334	0.74753	0.14558	0.70995	1.07057	0.01654	0.7926	0.07801	0.44369	0.25423	0.25781	0.50586	-0.42889	0.74424
YGL134W	-0.35708	-0.20364	-0.34396	-0.50347	-0.22142	-0.1451	-0.3008	-0.29001	-0.26736	-0.18117	-0.15954	-0.23941	-0.50546	-0.48016	-0.28771	-0.26436	-0.5143	-0.4328	-0.81494	-0.4942	0.09721	-0.32973	-0.71386	-0.3276	-0.13868	-0.26354	-0.58201	-0.63979	-0.47136	-0.34602	-0.55159	-0.63916	0.00968	-0.45367	-0.51662	-0.61706	-0.3737	0.08507	-0.25939	0.06485	-0.45971	-0.69663	-0.38058	-0.37858	-0.25598	-0.43905	-0.35208	-0.72373	0.0106
YDR425W	0.08267	0.09808	0.02907	-0.17373	-0.27254	0.18219	-0.26405	-0.22512	-0.328	-0.49735	-0.48501	-0.6398	-0.61397	-0.64733	-0.66192	-0.60895	-0.55775	-0.32927	-0.23078	0.08604	-0.02196	-0.14331	-0.64862	-0.65969	-0.32496	-0.20444	-0.14097	-0.24002	0.03731	-0.10385	-0.44621	-0.34691	-0.22669	-0.63733	0.01847	-0.03446	0.1132	-0.20647	-0.55462	-0.44963	-0.14889	0.01386	0.057	-0.19544	0.20186	-0.08698	-0.27442	0.4035	-0.01772
YJR094W-A	4.05893	4.04957	4.13881	3.88939	3.85264	3.97914	4.49926	3.77055	4.66342	4.3232	4.5816	3.81978	5.08311	4.85684	5.15655	5.06867	5.09679	5.44927	4.2516	4.04493	3.95487	3.89641	4.12136	4.37492	4.03869	4.03785	3.48966	3.9962	3.75861	4.01086	4.96975	4.27346	3.92817	3.75935	4.1478	4.10141	4.14469	3.97477	4.01483	4.06151	4.43537	4.65404	4.01768	4.38114	4.4151	3.96396	4.70722	4.06815	4.47596
YDR293C	2.83717	2.87189	2.78682	2.7388	2.81017	2.94662	3.2522	3.33941	3.19706	3.29755	3.28176	3.39741	3.18097	3.22418	3.29063	3.05304	3.1258	3.10692	3.35115	3.35236	3.27902	3.49504	3.41031	3.03754	3.28986	3.50938	3.23047	3.00773	2.95454	3.12283	3.39235	3.11925	2.98508	2.68371	3.3565	3.39926	3.42179	3.25103	3.30759	3.19484	3.24659	3.50661	3.08747	3.20868	3.09234	3.25972	3.27001	3.35003	3.1642
YBL113W-A	-1.80927	-1.2511	-1.58436	-1.37592	-0.96254	-1.86396	-0.82555	-1.21783	-1.00162	-1.02567	-0.87096	-1.03779	-3.45182	-3.30093	-3.26465	-2.86623	-2.92248	-3.62024	-0.97808	-1.86272	-2.02032	-2.06596	0.29671	-1.82673	-0.54548	-0.1812	-1.17928	-0.90706	-1.58822	-1.90443	-0.87853	-0.80658	-0.80936	0.04562	-1.61003	-1.71893	-1.23318	-2.02403	-0.83631	-2.49188	-1.60237	-0.82994	-0.27681	-0.10303	-1.46071	-1.61285	-2.2917	-2.23007	-1.60566
YNR015W	-0.70486	-0.59164	-0.58109	-0.71801	-0.51036	-0.693	-0.18441	-0.70606	-0.5934	-0.33689	-0.45064	-0.00577	0.15628	-0.05743	0.02557	0.07133	-0.19731	0.19598	0.34912	-0.44612	-0.18523	-0.47668	0.16827	0.29777	-0.22254	-0.15074	-0.19178	-0.6238	0.17804	0.15617	-0.28956	0.32025	-0.11822	0.38558	-0.05647	-0.21826	0.39864	-0.27111	0.08914	-0.03056	-0.33436	-0.09487	-0.20478	0.40379	-0.47685	-0.21389	-0.14038	-0.48028	-0.01229
YKL006W	4.28553	4.02775	4.33359	4.18081	4.53395	4.07022	5.5412	4.78842	5.36796	5.24262	5.50265	5.01214	5.75024	5.435	5.54604	5.43675	5.54262	5.68948	4.71859	4.02727	4.43935	4.44689	4.8622	4.77573	5.00072	4.52473	5.16762	4.94376	4.53272	4.4957	6.00253	5.01489	4.3459	4.49896	4.95157	4.63361	4.78917	4.40584	4.79477	4.42771	5.62283	5.51098	5.29817	4.87264	5.37564	4.77018	5.69296	5.04422	5.09289
YLR456W	-1.15519	-0.96181	-1.09914	-1.22843	-1.03601	-0.97005	-1.45669	-1.14409	-1.35831	-1.36425	-1.30137	-1.23189	-1.47064	-1.30859	-1.56116	-1.26962	-1.47852	-1.35881	-0.86178	-1.33828	-1.10935	-1.3893	-1.54944	-1.19893	-1.12229	-1.27744	-1.25912	-1.19616	-0.99482	-0.95436	-1.1674	-0.98053	-0.99344	-1.23879	-1.28047	-1.26976	-0.85416	-1.1202	-1.42242	-1.11553	-1.59337	-1.9015	-1.34703	-1.34939	-0.8221	-0.91757	-1.57998	-1.05262	-1.03743
YDR448W	-0.37278	-0.31028	-0.37717	-0.53671	-0.26221	-0.3786	-0.60939	-0.40246	-0.66954	-0.6541	-0.53951	-0.47646	-0.31737	-0.1961	-0.44497	-0.50546	-0.3596	-0.62784	-0.21043	-0.42157	0.02789	0.0658	-0.1719	0.20859	-0.37783	-0.03933	-0.4804	-0.43388	-0.16485	-0.33101	-0.96087	-0.22471	0.0253	-0.01595	-0.59455	-0.61621	-0.17179	0.00056	0.01721	0.18089	-0.50108	-0.55037	-0.50779	-0.00011	-0.1985	-0.28634	-0.12243	-0.66732	-0.31437
YIL166C	-2.86774	-2.36343	-2.69655	-2.35297	-2.59586	-2.70761	-1.26989	-1.21639	-1.46128	-1.23247	-1.33445	-1.33166	-2.75454	-2.71794	-2.9245	-2.44624	-2.82128	-2.81588	-2.07366	-2.06472	-2.191	-2.12244	-0.46067	-1.25342	-0.93409	-1.15514	-1.37675	-1.03288	-0.73013	-2.17578	-1.20361	-1.81587	-1.06216	-1.39801	-1.39731	-1.48615	-0.87013	-1.07277	-2.00195	-2.31006	-2.47536	-2.07928	-0.96956	-0.85805	-1.61127	-2.24074	-2.00605	-0.99182	-1.70299
YDR097C	-2.19835	-1.56008	-1.59375	-1.75977	-1.72867	-1.84061	-2.11325	-2.0676	-2.01254	-1.95167	-2.12896	-1.71663	-1.31675	-1.10254	-1.04741	-0.97991	-1.07759	-1.27471	-1.70049	-1.48606	-1.63739	-1.621	-2.29849	-1.69203	-1.7583	-2.14937	-1.70748	-2.02393	-1.48723	-1.34036	-2.15073	-1.60423	-2.03154	-1.77122	-1.89754	-1.64887	-1.96907	-1.61259	-1.99982	-1.78064	-1.43486	-1.71353	-1.72802	-1.1987	-1.78511	-1.49126	-1.87905	-2.0129	-1.53711
YER184C	-2.2425	-1.73877	-1.86528	-1.45337	-1.73456	-1.72197	-2.1727	-2.06139	-2.5323	-2.00483	-2.38657	-1.91922	-2.09566	-1.97201	-2.10824	-1.64371	-2.12591	-2.27392	-2.08078	-1.90668	-2.04193	-2.17526	-2.00939	-2.1312	-2.06362	-2.29773	-1.76312	-1.98869	-2.23808	-1.62958	-2.33945	-1.55315	-1.97618	-1.67488	-1.9476	-1.88571	-1.75587	-1.98451	-1.72993	-1.8708	-2.05722	-2.03927	-2.17968	-1.74595	-1.92582	-1.50608	-2.58228	-1.70582	-1.94506
YJL047C-A	4.25027	3.92871	4.32234	4.57738	3.7687	3.2397	3.67792	5.55536	5.17873	4.66034	3.81246	5.67346	4.29276	5.1488	4.53698	3.02867	4.56582	2.32624	4.61759	3.61553	4.24778	3.59768	5.00356	3.57542	2.37584	4.41267	5.95194	6.03223	3.20547	3.80311	4.85578	2.7516	4.04684	2.88475	5.05942	5.06591	3.91388	4.16767	4.31044	3.87293	3.52911	4.83272	4.83411	3.24387	3.34551	5.09165	3.34957	3.71932	4.56616
YJL066C	2.13447	1.87293	2.06089	1.93968	1.93152	1.98244	1.97572	2.42172	1.95038	1.96456	1.98896	2.12114	2.1507	2.26121	2.47588	1.65434	2.00807	1.73549	2.457	1.78767	2.60281	2.16633	1.9514	2.26649	1.84286	2.00413	2.5242	2.00396	1.69945	1.59037	2.09889	2.24884	2.2336	1.87631	1.85104	1.97023	2.15939	2.25485	1.84901	1.91571	2.17132	1.99821	2.19843	1.66452	2.25189	1.97699	2.50203	2.43204	2.34865
YLR368W	-0.72637	-0.67271	-0.74603	-0.69194	-0.92664	-0.52658	-0.96611	-0.94285	-0.7911	-0.94876	-0.92416	-0.9811	-1.07257	-1.12371	-1.0879	-0.95786	-1.1561	-0.93025	-0.81564	-0.85505	-0.77471	-0.74505	-1.04658	-0.89741	-0.69914	-1.11378	-1.15614	-0.94414	-1.21028	-0.92842	-1.10877	-1.38659	-0.83212	-1.78571	-0.95992	-0.9786	-0.70977	-0.57839	-0.94005	-0.80548	-0.75296	-1.02989	-1.26116	-0.90569	-0.68622	-1.05332	-0.75206	-0.64354	-0.94479
YOR194C	0.83746	0.67082	0.76535	1.01709	0.44055	0.61965	0.66605	0.71495	0.97864	1.26253	1.2358	0.83716	1.04677	0.18573	0.62734	0.44747	0.36094	0.63243	-0.23051	1.16225	0.9801	0.40595	0.02664	1.18001	0.65194	0.56821	0.52327	0.64176	1.03303	0.94324	0.90698	1.0164	0.84853	0.40377	0.67708	0.95762	-0.26581	0.84279	0.32615	1.27317	1.06076	-0.00488	1.05154	-0.07627	0.76234	0.97501	0.067	0.12611	1.01566
YKL095W	-1.09017	-0.85456	-1.00982	-1.17112	-1.19255	-1.05343	-0.87377	-0.70068	-0.55065	-0.50877	-0.81444	-0.59302	-0.58405	-0.89718	-0.79895	-0.89462	-1.10391	-1.11754	-1.22237	-0.7812	-0.34089	-0.55719	-0.68812	-0.61863	-0.79775	-0.63987	-0.55212	-0.65911	-0.77681	-0.53949	-0.84797	-0.49829	-0.31409	-0.52752	-0.90889	-0.74255	-0.9989	-0.47561	-0.60043	-0.43278	-0.56441	-0.91992	-0.49092	-0.6547	-0.76767	-0.43234	-1.31064	-0.83257	-0.63718
YGR060W	2.44932	2.45881	2.56336	2.45213	2.15752	2.21093	3.05304	2.48632	3.3333	2.9459	3.17839	3.11964	3.29255	3.08941	3.29511	3.4266	3.39253	3.20034	2.94737	2.51479	1.66809	2.49351	2.72424	2.23413	3.03453	2.73711	2.80872	2.91329	3.31847	3.55975	2.85052	2.11596	2.02603	2.33896	2.59873	2.54357	2.4664	2.28301	2.9313	2.15999	3.0128	3.26634	3.34488	2.88467	2.68544	3.16252	2.7755	2.20743	2.29098
YIR044C	3.17679	2.6709	2.68258	3.29755	2.9754	2.86775	-1.10383	-0.72272	-0.53179	-0.77836	-1.04149	-2.78879	-0.23765	0.14207	0.0911	-0.17341	-0.0537	-0.13588	-1.23583	-0.38543	-3.33755	-1.97614	2.73235	1.95015	-0.72272	-0.0041	-0.45078	0.16725	-1.49877	-1.08519	2.73533	1.57771	1.47613	2.18344	2.18151	2.72464	1.30484	1.85015	2.77464	2.12289	-1.841	-1.67967	-1.35754	-2.3052	3.04246	-1.13643	-2.31027	-0.39161	-1.79426
YHR041C	1.56906	1.31828	1.3671	1.16412	1.41651	1.0531	1.55598	1.3444	1.36817	1.31743	1.45952	1.42604	1.37887	1.33656	1.31134	1.43011	1.3644	1.47578	1.77582	0.90882	1.42477	1.82454	2.40295	1.3324	2.04879	2.01399	1.92916	2.1163	1.22211	1.6783	1.94222	1.50305	1.65108	1.73234	1.21912	1.34239	1.38861	1.46164	2.09439	1.37458	1.81075	2.24274	1.61369	2.00316	1.33432	1.4033	1.88346	1.48551	1.33317
YBR115C	0.12805	0.19413	0.29594	0.43649	0.19762	0.15033	0.54707	0.47108	0.65608	0.49812	0.37939	0.7348	0.24057	0.42581	0.39086	0.17976	0.42072	0.32343	0.51011	0.48543	-0.48527	-0.32539	-0.06775	-0.18304	0.4004	-0.12153	0.24684	-0.14749	0.26635	0.40265	1.18694	0.575	-0.1476	0.29156	0.73398	0.7227	0.06103	-0.11981	0.19279	0.02925	0.41096	0.64516	0.33088	0.39197	0.01522	0.31665	0.1869	0.6179	0.05527
YCR097W	1.37608	-0.26953	1.17998	0.97065	1.52312	0.9737	0.49811	0.69628	0.84547	0.39301	0.53002	0.04998	0.63111	0.01468	0.29793	-0.99768	0.14865	0.37341	1.76964	2.35737	-4.08362	-4.35301	0.68936	2.51337	1.15128	2.27583	0.9591	1.15404	2.91136	0.47032	1.64599	-0.75135	-4.31035	-4.11693	1.00196	0.94404	1.17489	2.0784	-4.17248	-4.30743	1.0298	-0.57486	1.41765	-1.35905	1.85037	1.07944	-0.05379	0.99683	1.02989
YBR147W	-0.60961	-0.72031	-0.65813	-0.49237	-0.28491	-0.38226	0.80148	0.75877	0.23496	0.55875	0.28213	0.17645	-1.42194	-1.17966	-1.25546	-0.92446	-1.41733	-1.37557	-0.25102	-0.61961	0.16067	0.32056	0.10588	-1.5671	0.88247	0.67524	0.61486	0.59557	-0.97922	-0.52243	1.13072	0.28111	-1.14239	-0.91511	-1.00094	-1.273	0.10964	-0.04861	-0.13979	-1.18135	0.7461	1.19651	-0.55605	-0.76551	0.2476	-0.63585	-0.06792	1.44926	-0.37015
YFL003C	-3.58262	-3.54178	-3.2702	-3.6929	-3.52334	-3.38372	-3.95846	-4.32131	-4.04948	-4.14335	-4.07462	-4.14292	-4.15712	-4.21466	-4.32056	-4.75874	-4.23977	-4.34626	-3.14543	-3.15548	-2.89561	-3.10234	-3.31806	-3.02762	-3.32229	-3.64016	-3.30909	-3.30528	-3.01477	-3.01507	-3.41533	-3.07865	-2.94523	-3.53934	-3.59677	-3.27131	-3.32844	-3.38616	-3.28145	-2.91633	-3.19809	-3.53317	-3.16652	-3.20357	-3.00048	-2.83192	-3.44744	-3.00151	-3.00827
YHR086W	0.2885	0.26873	0.24265	0.4054	0.25566	0.20859	0.88115	0.67573	0.6588	0.74744	0.65472	0.67456	0.96865	0.93368	0.75216	0.93842	0.94729	0.78855	0.31214	0.05851	0.24491	0.58693	1.01132	0.20601	0.8095	0.55414	0.78718	1.0601	0.0076	0.34647	1.01735	0.86362	0.2739	0.55859	0.22398	0.30963	0.6082	0.26103	0.93072	0.39949	0.76801	1.36475	0.5016	0.8828	0.57104	0.2563	0.89857	1.23294	0.43172
YOL120C	4.26196	4.00907	4.28862	3.98507	4.33759	3.82628	5.33582	4.93745	5.27477	5.12393	5.31884	5.02386	5.59069	5.41896	5.69833	5.52815	5.77096	5.54687	4.79128	4.10227	4.52739	4.49616	4.82642	4.6914	4.90179	4.29709	5.27971	4.29993	4.53876	4.68863	5.72377	5.04802	4.56653	4.9062	4.81452	4.41257	4.79438	4.49163	4.83825	4.54296	5.4812	5.77559	4.99218	4.93947	4.76118	4.42255	5.62489	4.90249	4.82308
YML079W	1.68268	1.43424	1.48176	1.22145	1.48869	1.42237	1.23792	1.2527	0.93893	1.15467	1.1251	0.97407	1.2354	1.38343	1.36148	1.26128	1.3229	1.47434	1.63445	1.53418	1.63813	1.54144	0.98161	1.33442	1.35629	1.4237	1.30649	1.38004	1.43757	0.86816	0.9908	1.05984	1.43194	0.73418	1.3809	1.3407	1.36613	1.441	1.12275	1.31403	0.9642	1.23014	0.96584	0.95457	1.5163	1.02058	1.5934	1.54835	1.80773
YOR125C	0.1313	0.3753	0.44471	0.59544	-0.0127	0.08413	0.96287	0.94725	0.85429	1.11269	1.22189	1.02464	0.96334	1.4516	1.43892	1.19127	1.23849	1.23607	1.09333	0.73739	0.99918	1.09267	0.96921	1.06651	0.75395	0.90303	0.94269	1.24711	0.251	0.09567	0.91381	0.90103	1.07123	1.06595	0.30745	0.32833	0.86544	0.76593	0.78918	1.10661	0.91314	0.76521	0.47338	0.08032	0.63452	0.45459	1.15791	0.93343	1.09756
YLR065C	1.54775	1.62176	1.69025	1.64812	1.51879	1.53288	1.54748	1.31035	1.48592	1.12183	1.72122	1.39106	1.95339	1.56756	1.74074	1.72984	1.38316	2.11869	1.53792	1.31016	1.30071	1.1943	1.53037	1.93161	1.70895	1.62291	1.5432	1.5553	1.73014	1.78121	1.46424	1.61358	1.72024	1.63424	1.65939	1.5572	1.89902	1.58987	1.7657	1.4576	1.63653	1.54059	1.62146	1.27732	1.6562	1.71654	1.40328	1.20844	1.39895
YNL298W	-0.40089	-0.19196	-0.46853	-0.64009	-0.1633	-0.34968	0.26616	0.23741	0.32129	0.24803	0.33178	0.23974	0.12641	0.33492	0.41715	-0.01753	0.25787	0.15345	0.36256	0.16125	0.30366	0.10347	0.10905	0.07515	0.30616	0.28193	0.00404	-0.05893	0.56032	0.22096	-0.45998	-0.25016	0.40814	0.0683	0.19262	0.21753	0.46109	0.22047	0.34557	0.21392	-0.09956	0.08119	0.1299	0.20691	-0.13409	-0.00014	0.1374	-0.1522	0.15674
YPL134C	-0.34642	-0.41997	-0.44405	-0.2054	-0.00904	-0.40363	0.23209	0.129	-0.36797	0.06488	-0.12729	0.18424	-0.69976	-0.46349	-0.53177	-0.30582	-0.66008	-0.426	-0.32976	-0.90972	0.40058	0.32894	0.22315	-0.06998	-0.30081	-0.30546	0.46056	0.07995	-0.74962	0.49684	0.46888	0.43898	0.02142	0.35671	-0.5174	-0.41623	0.37538	0.13803	0.51248	0.30182	-0.45377	0.08461	-0.45704	0.18647	-0.17004	0.68956	-0.08813	0.26271	-0.28465
YER078C	0.42204	0.71268	0.57394	0.72755	0.7443	0.6656	1.04811	1.15907	0.93523	1.1005	1.04688	1.18279	0.88373	0.95408	1.07412	1.1435	1.05044	1.08006	1.00134	1.05942	0.65062	0.67372	0.82488	0.95114	0.45347	0.52877	0.48829	0.30614	0.53464	0.13591	0.78267	1.53098	1.00056	1.21655	0.77125	0.7034	0.91287	0.86518	1.03696	0.91574	0.4312	0.50935	0.20312	0.58783	0.4856	0.55683	0.86333	0.73097	0.78262
YGL225W	2.06983	2.14327	1.67503	2.26591	2.08002	1.76354	2.38488	2.02973	2.28915	2.18755	2.2009	1.88332	3.32554	3.01418	2.95767	3.53477	3.37931	3.34268	1.85749	1.60894	1.94527	2.49705	2.87208	2.16619	2.65064	2.46759	2.49303	2.76358	1.97811	2.10228	2.29106	2.09398	1.67448	2.51973	1.92001	1.727	2.23877	1.86239	2.62265	2.27334	2.37509	2.7624	2.00942	2.29656	2.32458	2.32176	2.74791	2.20933	1.97167
YLR129W	-1.69069	-1.50411	-1.32969	-1.33436	-1.0421	-1.30584	-1.23034	-1.56467	-0.99557	-1.32052	-1.21503	-0.86027	-0.48293	-0.64907	-0.50864	-0.49975	-0.5188	-0.69903	-1.19682	-1.3482	-1.35411	-1.68623	-1.2131	-0.36376	-1.55734	-1.85676	-1.47517	-1.74444	-1.57256	-0.86853	-1.65057	-1.03222	-1.05252	-0.88545	-1.0165	-0.84506	-1.34312	-1.40723	-0.81462	-0.55512	-1.0511	-1.02772	-1.34791	-0.99786	-1.34582	-1.36655	-1.17086	-1.99661	-1.08293
YNL224C	-0.36024	-0.52171	-0.29427	-0.44539	-0.25547	-0.31487	-0.92088	-0.78096	-0.63588	-0.6172	-0.53135	-0.69244	-0.67762	-0.74062	-0.8398	-0.99121	-1.03233	-0.69862	-1.13126	-0.35927	-0.45747	-0.83358	-1.32461	-0.62589	-0.53323	-0.72393	-0.53633	-0.77284	-0.23667	-0.61094	-0.60649	-0.42718	-0.73627	-0.26632	-0.42244	-0.30762	-1.11619	-0.45821	-1.08265	-0.59004	-0.4608	-1.05218	-0.48964	-0.83972	-0.41581	-0.20544	-0.72443	-0.89823	-0.54691
YNL122C	-0.09662	0.06531	0.08472	-0.09801	-0.0736	-0.19122	0.29034	0.41115	0.29292	0.22761	0.07598	-0.31123	0.52858	0.31643	0.61084	-0.19384	0.08348	0.11849	-0.85606	-0.38735	0.44706	-0.49571	-0.7294	0.19803	-1.26028	-0.54647	-0.41928	0.1806	0.06553	-0.53107	0.05854	-0.42086	-1.87529	-0.68702	-0.50423	0.08641	-0.98423	-0.63145	-0.39146	0.7237	0.17875	-0.24262	-0.29055	-0.83035	0.51967	-0.17869	-0.87843	0.45808	0.1061
YGL066W	0.07829	-0.11915	0.01036	-0.06785	0.03152	0.04616	0.29444	0.43883	0.662	0.57662	0.69967	0.58411	-0.17029	-0.22075	-0.36079	-0.58261	-0.40477	-0.42498	0.13995	1.04184	0.71281	0.41928	-0.65664	0.05637	-0.07612	-0.15788	-0.08306	-0.39781	0.95528	0.02941	-0.3604	-0.06518	1.01391	1.10081	0.30174	0.73538	0.55778	0.99566	-0.4163	0.03388	0.03166	-0.21558	1.17462	0.6411	0.55763	0.3319	0.61996	0.43225	0.57983
YNL217W	1.07583	1.08561	1.22303	1.21939	0.80491	1.08565	0.88209	0.87826	1.15334	0.96971	0.99335	0.98445	0.68758	0.51707	0.80954	0.97145	0.54991	0.49429	1.04125	1.29282	0.98031	1.05521	0.67011	0.98717	0.62269	0.73783	0.74473	1.11579	2.48368	1.53252	1.36348	1.59848	1.61162	1.94179	1.89115	1.89503	0.90649	1.26953	0.84132	0.86163	0.5411	0.5535	1.06309	1.07656	0.7409	1.44416	-0.03234	-0.69243	1.12188
YCL067C	0.85673	0.19184	1.15156	0.70967	0.10732	0.50775	0.49469	-0.04418	0.69304	0.42356	0.48644	-0.19336	0.12123	-0.63385	-0.34539	-0.53974	-0.7498	-0.19618	0.02999	1.60603	1.72228	0.94138	-0.93895	0.27749	0.36827	0.68706	0.31244	1.01809	0.81785	0.34494	1.085	0.06614	0.82967	0.79289	0.26783	0.80346	-0.31477	1.07144	0.41994	2.04526	0.73936	-0.69609	0.69357	-0.67042	0.82716	0.85604	0.17149	0.11503	0.26998
YGL063W	-0.36551	-0.68026	-0.92024	-0.78399	-0.7458	-0.80907	-0.75613	-0.74519	-0.86883	-0.68424	-0.57122	-0.64235	-0.48697	-0.49083	-0.85485	-0.7068	-1.12999	-0.63389	-0.46192	-1.43717	-0.28729	-1.00444	-0.28197	-0.90484	-0.04807	-0.91953	-0.39287	-0.71244	-0.66361	-0.27042	-0.59227	-0.0968	0.15618	0.56978	-0.82229	-1.02393	-0.33459	-0.72556	-0.14329	-0.52958	-0.03677	0.12325	0.4826	0.24868	-1.13991	-0.50887	-0.42605	-0.60144	-0.1578
YML030W	0.97125	1.02541	0.91343	0.64203	1.33468	0.91827	1.22963	1.29044	1.43105	1.29938	1.59542	1.01727	2.11143	1.42515	1.72843	1.45898	1.89617	1.92241	0.28662	0.86811	1.49087	1.49992	1.3302	1.45654	0.97177	1.39056	1.55615	1.7412	0.98342	1.08446	1.63608	0.93036	0.66867	1.09148	1.18471	0.87973	0.28488	1.41894	1.12829	1.36648	1.23894	0.67389	1.09667	0.69898	1.23118	1.22851	1.33259	0.97764	1.39403
YAL039C	0.80861	0.5662	0.89301	0.49301	1.01138	0.37987	1.43211	1.48283	0.8534	1.27949	1.23574	1.41565	0.87487	0.92538	1.03958	0.83361	0.82439	1.34371	0.26173	0.2879	0.77667	0.95045	1.097	1.26387	0.25475	0.68157	1.1765	1.25955	0.121	0.9911	0.59037	1.23494	0.80071	1.724	0.94937	1.0029	0.45345	0.19716	1.10064	0.99692	0.81862	1.41554	1.21181	1.31776	0.59865	1.09688	1.47383	1.17178	1.26513
YOR261C	2.63908	2.47905	2.56446	2.63269	2.41031	2.70893	2.22624	2.21707	2.39035	2.45908	2.36367	2.29218	2.42874	2.21646	2.45859	2.00207	1.9909	2.33628	1.67426	3.10219	2.22787	2.14479	1.14918	2.30226	2.24026	2.56849	1.6885	2.25987	2.31771	2.1675	2.31148	2.04601	2.26793	2.08986	2.33492	2.59141	1.64702	2.88456	1.68211	2.60143	2.59239	1.44872	2.00164	1.98149	2.69912	2.57384	2.33855	2.25769	2.20811
YMR316W	-1.10927	-0.59974	-0.9904	-0.77225	-1.15999	-1.23874	-1.30259	-1.36807	-1.44635	-1.1145	-1.12747	-1.18194	-1.57222	-1.66021	-1.2521	-1.2291	-1.47852	-1.48901	-0.79549	-0.55484	-1.26069	-1.29071	-1.45185	-1.40686	-1.50361	-0.92427	-1.5695	-1.46416	-0.41379	0.94858	-0.55159	-0.41848	-1.01691	-0.76563	-0.35552	-0.37788	-1.33991	-1.13731	-1.56213	-1.38833	-1.03287	-0.91066	-1.40558	-0.65404	-0.93576	1.69928	-1.21775	-1.45301	-1.1652
YLR191W	-0.37445	-0.12485	-0.23357	-0.14842	-0.00543	-0.11525	-0.18094	-0.1896	-0.29521	-0.04669	-0.22623	-0.16685	-0.19401	-0.06574	-0.20845	-0.11669	-0.13682	-0.00574	-0.30606	-0.57887	-0.03851	-0.25075	-0.02732	-0.05319	-0.3511	-0.31969	-0.08577	-0.16693	0.00022	-0.45056	-0.44554	-0.05663	0.00885	0.45106	-0.26259	-0.12449	-0.08347	-0.29559	-0.08221	-0.24159	-0.37714	-0.41235	-0.15357	-0.05261	-0.50731	-0.34485	-0.14683	-0.33556	-0.13878
YCR027C	-0.32416	0.20317	-0.03691	0.2718	0.11631	-0.19987	0.07487	-0.0987	0.05751	0.00359	-0.12057	-0.05354	0.02341	0.2948	0.11006	0.44988	0.4598	0.4886	0.04596	-0.23201	-0.54904	-0.05781	0.50285	-0.04199	-0.00216	0.07693	0.10097	0.32944	-0.25403	-0.23263	-0.04144	0.04404	-0.06101	0.00925	-0.04135	-0.30426	0.03526	-0.4616	0.04492	-0.28889	-0.00843	0.19484	0.05563	0.3461	-0.12985	-0.03818	0.07492	0.03244	-0.38638
YER125W	2.63736	2.61846	2.48512	2.58763	2.63095	2.70519	3.00915	2.83316	2.87336	2.95768	2.85915	2.90031	2.98896	3.34115	3.19246	3.00278	3.54036	3.06808	2.74304	2.80357	2.82205	2.88878	3.02377	2.99266	3.16512	2.93495	2.65068	2.63759	2.3021	2.3638	2.98089	2.6798	2.75702	2.56748	2.58031	2.84985	3.01526	3.22507	2.95555	2.91863	2.78337	3.07549	2.38478	2.70023	2.76065	2.69861	3.09456	3.07465	2.47656
YDL046W	3.06285	2.99683	2.95245	3.06472	2.77513	2.87644	3.20389	3.44446	3.16096	3.5816	3.50862	3.24616	3.81318	4.09586	3.72946	3.60175	3.94926	3.24785	3.22641	2.86869	3.38043	3.25602	3.65506	2.64706	3.54457	3.57353	3.3394	3.77124	2.32948	3.04773	4.17504	2.57639	3.03044	2.26449	3.19386	3.14002	3.14859	3.45298	3.39407	2.93184	3.34051	3.85781	3.31179	2.92429	3.11394	2.93215	3.56049	3.7864	2.99581
YMR263W	-0.44819	-0.2151	-0.41666	-0.247	-0.70062	-0.25825	-0.50338	-0.4867	-0.4545	-0.30276	-0.17555	-0.3923	-0.32563	-0.69752	-0.80924	-0.84893	-0.99902	-0.70762	-0.41182	0.04154	0.07379	-0.36304	-0.53969	0.73518	-0.28771	-0.19257	0.14009	-0.24636	0.45155	-0.08944	0.09243	0.52055	0.35987	0.67459	-0.14396	0.11333	-0.37081	0.1929	-0.31105	0.36602	-0.18935	-0.5386	-0.02527	-0.28487	-0.42405	0.10726	-0.44662	-0.9833	0.02824
YOL113W	-0.47184	-0.36548	-0.52327	-0.20339	-0.54133	-0.30169	-0.57717	-0.44577	-0.42274	-0.605	-0.54137	-0.22707	-1.59542	-1.42854	-1.50508	-1.26308	-1.41384	-1.23455	-1.12241	-0.4694	-0.94475	-0.75356	-0.70292	-0.94942	-0.69228	-0.43019	-0.61386	-0.36109	0.10983	-0.72361	-0.59561	-0.82943	-0.57002	-0.8801	-0.25986	-0.21346	-1.0956	-0.59426	-0.67874	-0.6119	-0.96015	-0.86822	-0.04481	0.09206	-0.44601	-0.55018	-0.94143	-0.92217	-0.41368
YAL001C	0.01769	0.06227	-0.10311	-0.19875	-0.012	-0.08269	-0.41981	-0.11299	-0.105	-0.21567	-0.0763	-0.3944	-0.29827	-0.22303	-0.37347	-0.48936	-0.31473	-0.36687	-0.81613	-0.09653	0.04136	-0.08908	-0.78312	-0.10611	-0.18722	-0.29585	-0.29593	-0.51351	-0.56034	-0.18239	-0.48529	-0.36615	-0.19267	-0.50871	-0.56513	-0.46961	-0.68741	0.15699	-0.64075	-0.25231	0.02192	-0.59892	-0.34836	-0.63574	-0.19174	-0.06722	-0.21681	-0.32447	-0.17006
YDR517W	2.31242	2.44611	2.29179	2.4116	2.07654	2.00451	1.78424	2.00339	1.79961	1.70226	1.73836	2.02316	1.95674	1.74577	1.81007	1.80067	1.64699	1.50336	2.78534	2.43808	1.6398	1.84782	2.14298	1.45421	2.25777	2.38259	2.00544	2.48136	2.54731	2.13977	2.03095	2.4935	2.51539	3.22408	2.83444	2.58693	2.38604	2.25926	2.34503	1.54041	1.90895	2.03922	2.63581	3.19346	2.22995	2.26949	2.63569	1.87246	2.25277
YBR197C	-0.35662	-0.27951	-0.70818	-0.8777	-0.32919	-0.82361	-1.0034	-0.67882	-0.66012	-0.90955	-0.97987	-0.60516	-0.25588	-0.24482	-0.4962	-0.59699	-0.83606	-0.65119	0.04917	-0.74123	-0.50392	-0.47489	-0.19173	-0.0292	-0.40057	-0.45698	-0.25432	-0.28793	-0.79123	-0.8915	-0.37477	0.03788	0.58385	1.09338	-0.30979	-0.39204	-0.36415	-0.57297	-0.49542	-0.98535	-0.17882	0.09849	-0.00301	0.47282	-0.67481	-0.95892	-0.24016	-0.3096	-0.21563
YJR132W	0.23353	-0.02331	-0.18998	0.29199	0.18914	0.14084	-0.25253	-0.42839	-0.2616	-0.35886	-0.2498	-0.34006	0.10811	-0.00916	-0.04955	0.1659	0.11691	-0.13283	-0.18096	-0.17004	-0.25037	-0.02219	-0.23335	0.00336	-0.04981	-0.5652	-0.24642	-0.21861	-0.07758	0.09932	-0.8633	-0.49031	-0.4317	-0.12979	-0.0747	0.06486	0.09167	-0.12873	-0.03997	-0.0565	-0.25564	-0.00869	-0.21178	0.21115	-0.13374	-0.10858	-0.34616	-0.74998	-0.12394
YDR192C	0.05542	0.03452	-0.09979	0.02545	0.43803	0.13745	0.21603	0.31514	0.15634	0.19388	0.23303	0.21046	0.30291	0.48904	0.43753	0.54124	0.47181	0.30746	0.16957	-0.24811	0.4609	0.33607	0.34042	-0.11993	0.46125	0.21594	0.31335	-0.10347	0.06941	0.22654	0.14746	0.45505	0.49742	0.76487	0.00916	-0.06273	0.60155	0.13399	0.15133	0.06085	0.39388	0.33847	0.24517	0.33258	0.06817	0.09089	0.57245	0.24101	0.30967
YER021W	2.91173	2.76719	2.96896	2.80474	2.70635	2.94698	2.92909	3.0745	2.87303	2.93531	2.89871	2.73451	3.03975	3.30562	3.33296	2.93756	3.35574	3.32389	2.69635	3.11222	2.68906	2.52911	2.08776	2.80269	2.66414	2.82532	2.57278	2.67365	2.88438	3.0432	2.64358	2.75725	2.80372	2.22559	2.69399	3.14278	2.94652	3.13578	2.44462	2.93921	3.00029	2.40509	2.70824	1.99677	3.1849	3.0821	3.1565	3.0355	2.96768
YKL014C	-1.80703	-1.59416	-1.21138	-1.34277	-1.52672	-1.5439	-1.64814	-2.04772	-1.51328	-1.81769	-1.83983	-1.30409	-1.26114	-1.15462	-0.97034	-0.76375	-1.11836	-1.25067	-1.34558	-1.3931	-1.76847	-1.67407	-1.78734	-1.09242	-1.76227	-1.99499	-1.69906	-1.74444	-1.32187	-0.98351	-1.68235	-1.75005	-2.27062	-2.13255	-1.3906	-1.12031	-1.66452	-1.6894	-1.6565	-1.22276	-1.20089	-0.85582	-1.39187	-1.24351	-1.85425	-1.56229	-1.76075	-1.99787	-1.6583
YGL034C	-2.29095	-3.23264	-3.20207	-3.71123	-2.62615	-4.02111	-3.3901	-3.99564	-3.95385	-4.10908	-3.01054	-3.9901	-4.36675	-4.14783	-4.24747	-3.2129	-4.48577	-4.84678	-2.00835	-2.98196	-2.76816	-2.95409	-1.86599	-3.23074	-3.04204	-2.69526	-2.49954	-2.9493	-2.59071	-3.01732	-2.8845	-3.68185	-1.74751	-2.83266	-2.46911	-2.98123	-2.14019	-2.94307	-2.76453	-4.1332	-2.37765	-2.96508	-2.68741	-2.80085	-1.72406	-2.90736	-2.42814	-2.82279	-2.72882
YGR197C	0.19063	0.26114	0.12061	0.24364	0.1616	-0.07192	0.52077	0.42774	0.28712	0.52805	0.3095	0.47665	0.3781	0.28534	0.01375	0.38166	0.25159	0.17998	0.04092	-0.4191	-0.39627	0.30759	0.77567	-0.80096	0.73079	0.80643	-0.17341	0.35762	-0.07193	0.21554	0.3784	-0.1528	0.56562	0.27166	-0.31147	-0.3369	0.01659	-0.03738	0.78325	-0.67522	0.30184	0.84707	0.91434	0.80504	-0.26392	-0.5037	-0.06945	0.0629	-0.22924
YDL106C	0.3586	0.44995	0.53331	0.04721	0.09388	0.39648	0.3182	0.40821	0.36699	0.35468	0.24928	0.3828	0.26688	0.39346	0.46798	0.3368	0.40668	0.51879	0.39526	0.75695	0.46608	0.271	0.08673	0.30347	0.02776	0.15937	0.24654	0.08291	0.8741	0.31363	0.01801	0.32564	0.52859	-0.27628	0.33683	0.72542	0.62128	0.54509	0.06889	0.41193	0.50866	0.3147	0.19203	0.15956	0.82445	0.44075	0.30151	0.50769	0.37082
YDR365C	-0.48922	-0.78206	-0.16709	-0.38642	-0.70524	-0.81939	-1.48402	-1.96801	-1.14788	-1.32444	-1.37536	-1.08782	-1.35247	-1.81273	-1.56444	-1.4142	-2.00524	-1.88073	-0.12164	1.10714	0.41548	0.66791	-0.17955	0.48598	-1.73245	-1.52592	-1.27027	-1.34759	0.78261	-0.67889	-1.78673	-1.40414	-0.59333	-0.37172	-0.89347	-0.77948	-2.00042	-1.40451	-1.23226	-1.20925	-0.87927	-0.82421	-0.53161	-0.5176	-1.69545	-1.05216	-1.74199	-1.90937	-1.63896
YNL280C	0.4192	0.59913	0.4126	0.56401	0.38453	0.5349	1.66643	1.47064	1.61427	1.54493	1.64851	1.47058	1.6178	1.49649	1.60739	1.93634	2.02359	1.80163	0.48949	0.48848	1.05447	1.23224	1.67028	0.42188	1.42617	0.94345	1.34344	1.48371	1.12672	1.11141	1.37475	0.6607	0.55528	0.86996	0.12804	0.3604	1.30565	0.97476	1.40622	0.17687	1.37009	1.22781	1.24345	1.50494	1.2863	0.91848	1.51094	1.24897	0.93723
YCR030C	2.51355	2.52569	2.51954	2.41876	2.30649	2.28996	2.99848	2.94749	2.88622	3.04658	2.96079	2.86573	3.04862	2.82943	2.86107	2.87536	2.78602	3.23353	2.67908	2.45619	2.74577	2.945	3.23063	2.29199	2.93042	2.81412	3.04719	2.99925	2.38821	2.80242	3.13137	2.90784	2.90095	2.98493	2.66289	2.64403	2.89803	2.73222	2.83491	2.39474	2.68317	3.13504	2.57969	2.86571	2.82817	2.53427	2.93802	2.863	2.79846
YDL154W	-3.36514	-2.85325	-3.00903	-3.04823	-2.92795	-2.5703	-2.65877	-2.46801	-2.65472	-2.43431	-2.90913	-2.58761	-2.23102	-2.1771	-2.2255	-2.00488	-2.08228	-2.34697	-2.85784	-2.63882	-2.5021	-2.68643	-3.06531	-2.59843	-2.97859	-3.13937	-3.1659	-3.08316	-3.21036	-2.87935	-2.74476	-3.28669	-2.41208	-2.05301	-2.87274	-2.51444	-2.84205	-2.30295	-2.6753	-2.51633	-2.66354	-2.62134	-2.94065	-3.06978	-2.65291	-2.71418	-2.99362	-2.78918	-2.62056
YDR505C	1.42702	1.19537	1.01292	1.24402	1.34975	1.60936	1.33824	1.45569	1.62021	1.41978	1.2836	1.39902	1.02637	0.99942	1.06781	0.90413	1.0247	0.95405	1.33414	1.54362	1.24024	1.31163	1.14487	1.09426	1.36417	1.20801	0.98089	1.09643	1.43655	1.43563	1.14521	1.17965	1.14622	1.12765	0.95642	1.28527	1.82516	1.68548	1.16295	1.24292	1.23835	1.39474	1.44895	0.93898	1.38288	1.85199	1.348	1.66909	1.42899
YGL033W	-4.5096	-4.4968	-4.18808	-4.25806	-4.4094	-3.8056	-4.17642	-4.52156	-4.31892	-4.1458	-3.84441	-4.18075	-3.87242	-4.31544	-4.04078	-4.65345	-4.57798	-4.17692	-3.7463	-3.14167	-3.74024	-3.92534	-3.81048	-3.30649	-3.46427	-3.46227	-4.27671	-3.73331	-3.69781	-3.49422	-3.74398	-3.98598	-3.94111	-3.49103	-3.81376	-3.4275	-3.61286	-4.16472	-3.6312	-3.02294	-3.30597	-3.83965	-3.63287	-3.89896	-3.2098	-3.51851	-3.68919	-3.586	-3.60822
YMR211W	-1.71775	-1.47397	-1.43581	-1.5373	-1.61564	-1.81352	-1.70217	-1.26237	-1.51905	-1.5952	-1.47502	-1.38425	-1.55931	-1.30159	-1.294	-1.5118	-1.45999	-1.67899	-1.40724	-1.41608	-1.50869	-1.71939	-2.02523	-1.52819	-1.82357	-1.93688	-1.57718	-1.67423	-1.04316	-1.76614	-1.70525	-1.22623	-1.28932	-1.76515	-1.15346	-1.36237	-1.52176	-1.5613	-1.74635	-1.64744	-1.53157	-1.59998	-1.50029	-1.40653	-1.48148	-1.53895	-1.73616	-1.46866	-1.31361
YGL202W	2.84499	2.69555	2.84397	2.92567	2.99206	2.97159	3.4787	3.29767	3.23779	3.52792	3.58322	3.35002	3.988	3.87904	3.77014	3.98025	4.08447	4.07982	3.04501	2.66366	3.16922	3.34614	3.46518	2.90359	3.55757	2.96729	3.50231	3.31229	2.83117	3.39807	3.92743	2.70863	2.95331	1.85241	3.07335	3.03767	3.38056	2.79235	3.27241	3.11645	3.59219	3.88121	3.2651	3.44174	3.00601	3.01944	3.65637	3.51151	3.0763
YBL036C	1.24843	1.15088	1.63415	1.14759	1.47243	1.32702	0.62426	0.78714	0.91165	0.56753	0.92753	0.50183	1.06718	1.0374	1.0055	0.40569	0.99126	0.79664	0.59222	1.19228	0.91798	0.7502	0.15294	0.62189	0.67841	0.6318	0.7462	0.91743	1.36917	0.60482	0.68661	-0.11738	0.63461	-0.01181	1.15499	1.12346	0.40924	0.9791	0.79628	1.28675	1.14454	0.3082	0.83322	0.07277	1.6313	1.04635	0.72451	0.51847	1.2121
YIL176C	0.80975	0.32276	0.46577	0.3518	0.19129	0.3598	-0.22156	-0.76503	-0.30384	-0.32288	-0.59401	-0.16558	0.25956	0.27169	0.23854	0.47416	0.432	0.21483	0.53071	0.29153	-0.35684	0.01869	0.66059	-0.25547	0.23961	0.41734	-0.21862	-0.42449	0.98564	0.12294	0.24386	0.09501	0.45926	0.40319	0.40798	0.4618	-1.07161	-0.95368	-0.12986	-1.38229	-0.87722	-0.62261	0.87238	0.53446	-1.07463	0.32118	-0.13922	0.14532	-0.20493
YPR178W	-1.001	-0.66067	-0.87113	-1.09053	-0.63424	-0.89011	-0.98032	-0.72625	-0.89249	-0.6706	-0.96201	-0.81381	-1.17822	-1.06932	-0.92441	-0.86603	-1.1846	-1.30507	-1.06005	-0.84295	-0.94236	-1.18683	-1.35094	-0.90115	-0.93276	-1.12256	-1.11944	-1.16633	-1.11022	-1.05153	-0.9932	-0.21448	-0.99344	-0.38323	-0.76743	-0.70738	-1.18787	-0.95862	-0.98574	-0.88203	-1.13343	-1.32067	-0.78261	-0.69676	-1.04346	-0.852	-0.91781	-1.23093	-0.88169
YOL147C	-1.12868	-0.4663	-0.74781	-0.64083	-0.56788	-0.59023	0.31368	0.06365	0.21231	0.13532	0.22144	0.219	0.11487	0.10777	0.08494	0.56338	0.12067	0.1268	-0.60921	-1.21456	-0.24099	0.43144	0.857	-0.8727	0.12726	0.31742	0.43807	1.05351	-0.75049	-0.1587	0.74162	0.06845	-0.51244	-0.03079	-0.34315	-0.7963	-0.04303	-0.34372	0.58931	-0.36648	-0.31503	0.34036	-0.4915	0.5711	-0.7894	-0.19587	-0.73539	-0.3836	-0.13701
YFR007W	-1.25634	-0.91819	-1.00764	-0.72761	-0.90895	-0.93145	-0.29313	-0.24454	-0.65148	-0.39084	-0.32075	-0.18298	-0.38594	-0.13895	0.0563	0.01985	0.44637	-0.41694	-0.51001	-1.0677	-0.62118	-0.50606	-0.51334	-0.52086	-0.82182	-0.53845	-0.5319	-0.43178	-1.30732	-0.92185	-0.52414	-0.54003	-0.88859	-0.64741	-0.93982	-0.73121	-0.72103	-0.94088	-0.75655	-0.75965	-0.47275	-0.39115	-0.97277	-0.78777	-0.55401	-0.86389	-0.63604	-0.64423	-0.5916
YEL008W	-3.46513	-3.13969	-3.54206	-3.69694	-3.56699	-3.37177	-3.49296	-3.51111	-4.22669	-3.59876	-3.60238	-3.60385	-3.37114	-3.60776	-3.7539	-2.92459	-3.08322	-3.61856	-3.44458	-3.23453	-2.70924	-2.34954	-2.76384	-3.05699	-2.3112	-2.32932	-2.80117	-2.71141	-3.56105	-2.85294	-3.14626	-3.8613	-3.59632	-3.17769	-3.71421	-3.63057	-2.72665	-3.02094	-2.71825	-2.74962	-2.71174	-2.88954	-3.5437	-3.45573	-3.21786	-3.11855	-2.96323	-2.74357	-3.28594
YGR072W	-1.26835	-1.26985	-1.16017	-1.2493	-0.82302	-1.08244	-1.50486	-1.3941	-1.29955	-1.05044	-1.11315	-1.66164	-0.89791	-1.55951	-1.51353	-1.62494	-1.94217	-1.11957	-1.44996	-0.81892	-0.71896	-1.50451	-2.28373	-0.68046	-1.33041	-1.47584	-1.20187	-1.55857	-1.00175	-1.69459	-0.81784	-0.56714	-1.26018	-0.13302	-1.39852	-0.8173	-1.53484	-1.16853	-1.99994	-0.54462	-1.11374	-2.02896	-1.12517	-2.13795	-1.102	-1.04846	-1.10614	-1.57842	-0.71888
YNL069C	3.96287	3.92795	4.15072	3.74146	4.08286	3.66706	5.57521	4.92456	5.26265	5.00215	5.39254	4.96192	5.65588	5.47718	5.72091	5.716	5.66113	5.24876	4.6006	3.8092	4.38691	4.44381	4.98744	4.66333	4.92835	4.09738	4.6147	4.19866	4.14687	4.62468	5.45046	4.76116	4.35388	4.67584	4.50533	4.09672	4.59109	4.10753	4.95369	4.48979	5.02799	5.16807	4.72148	4.99115	4.4902	4.05708	5.41186	4.55948	4.67916
YER022W	-0.21332	-0.32866	0.07414	-0.19234	-0.34232	0.17019	-0.54641	-0.4797	-0.36983	-0.51025	-0.39629	-0.5648	-0.25261	-0.34832	-0.23133	-0.60177	-0.58263	-0.30248	-0.96146	-0.14984	-0.1662	-0.55096	-1.14633	-0.12786	-0.68751	-0.55023	-0.61347	-0.67319	-0.06208	-0.59966	-0.60097	-0.99392	-0.64255	-0.47268	-0.7467	-0.30063	-0.84926	-0.01149	-0.85226	0.0102	-0.43531	-0.85467	-0.61086	-0.64434	-0.13959	-0.24607	-0.6093	-0.37453	-0.25776
YIL118W	0.36924	0.79968	0.78237	0.75885	0.66022	0.87716	-0.01402	-0.01455	0.22532	0.09112	0.36708	0.27239	0.86418	0.78627	0.90107	0.96167	0.76479	0.8525	0.81083	0.76712	0.83401	0.98647	0.86049	0.83817	0.66927	0.9513	0.39986	0.59535	1.08066	0.64007	0.31119	0.49652	0.75776	0.96172	0.75732	0.71597	0.94388	0.93853	0.82951	1.01206	0.38786	0.45905	0.4622	1.08035	0.53493	0.71005	0.5578	0.36051	0.42204
YJR008W	-0.01359	0.06977	0.10319	0.02221	0.38996	0.31138	-0.14938	-0.27792	-0.61821	-0.36733	-0.44472	-0.18147	-1.02491	-0.79713	-0.49495	-0.55051	-0.65997	-0.80764	-0.08923	-0.02348	0.0855	0.11696	0.36494	0.03314	0.13058	0.1729	0.78317	0.77544	-0.33759	-1.08092	-0.29333	0.13131	0.41518	0.23282	-0.5611	-0.8458	0.03689	0.14981	-0.17499	-0.38594	-0.12875	-0.42817	-0.72105	-0.69015	0.06219	-0.94366	0.39357	0.77884	0.58173
YKL217W	-3.04534	-2.48352	-2.98144	-2.66194	-2.61341	-2.89998	-0.52483	-0.79646	-1.31816	-0.59291	-0.59334	-0.67009	-2.78962	-2.70545	-2.67977	-2.09899	-2.78042	-2.66843	-1.87443	-2.1632	-1.04938	-1.04312	-0.9768	-2.23654	-1.26872	-1.30897	-0.22294	-1.02338	-2.80091	-1.85458	-1.09931	-1.00238	-1.81376	-2.22225	-2.32073	-2.05852	-0.62093	-1.40893	-0.88371	-1.67402	-1.20816	-0.59456	-1.84883	-1.37254	-1.40949	-1.82385	-2.00331	-1.08672	-1.61403
YAR060C	-2.09167	-2.50736	-1.84353	-1.9262	-1.89956	-1.99016	-3.57217	-2.81292	-3.01179	-3.17932	-3.54197	-2.54294	-3.52662	-2.71553	-3.63498	-3.42164	-3.70248	-3.81129	-2.29638	-2.33052	-1.60868	-1.80104	-2.62424	-2.25962	-3.34454	-3.42101	-1.77636	-2.10813	-2.47704	-3.38077	-2.75103	-2.6437	-2.16584	-1.65701	-2.54422	-2.56487	-2.20863	-2.21147	-2.49683	-2.37651	-1.98087	-1.69973	-1.89519	-2.22694	-2.96147	-3.43717	-3.4174	-2.79281	-3.12587
YCL010C	0.71349	0.78993	0.70135	0.99021	0.82551	0.56131	0.28114	0.52292	0.44534	0.17361	0.50412	0.78698	0.31103	0.38495	0.3668	0.69079	0.18241	0.07574	0.53518	0.97064	0.28637	0.38702	0.44797	0.48177	0.33128	0.72401	0.25099	0.24401	0.91368	0.28179	0.12177	0.79124	0.91006	2.09259	1.11597	0.6633	0.19051	0.65006	0.80297	0.63965	0.19534	0.54766	0.82341	1.1546	-0.05097	0.54873	0.554	0.29194	0.3929
YPL036W	-2.20426	-1.61177	-2.10891	-1.97856	-1.73686	-2.03369	-1.41997	-1.28403	-1.34728	-1.34248	-1.53856	-1.23019	-2.25546	-2.1949	-2.6946	-1.90705	-2.43562	-2.01528	-1.56813	-2.00549	-1.52164	-1.10233	-0.17563	-1.54693	-0.85354	-0.37155	-1.16917	-1.07998	-1.04221	-1.01214	-1.42338	-0.90704	-1.11914	-0.0943	-0.78595	-1.58691	-0.79949	-0.93982	-0.96323	-1.76615	-1.32041	-0.5552	-0.86814	-0.61894	-1.58667	-1.19316	-1.45132	-0.80092	-1.31193
YNL303W	-4.0515	-3.9165	-3.84683	-3.76824	-4.11395	-3.72801	-3.63314	-3.62136	-3.90471	-3.22991	-3.89647	-3.65937	-3.24834	-3.92064	-3.67572	-4.14872	-3.57206	-3.66455	-3.36978	-3.42467	-3.34442	-3.27294	-3.83194	-3.31405	-3.73638	-3.41117	-3.28352	-3.372	-1.99818	-3.21166	-3.53679	-4.33224	-3.13721	-3.16392	-3.66604	-3.0102	-3.91331	-3.57068	-3.74365	-2.86944	-3.43371	-3.33486	-3.26496	-4.10536	-3.48405	-2.7513	-3.62643	-2.93178	-3.60316
YJR024C	1.08825	1.37034	1.10882	1.40385	1.06845	1.04042	0.7688	0.66071	1.03727	0.64725	0.8261	0.73744	1.40318	1.51707	1.37744	1.71756	1.51499	1.74575	1.09669	0.5545	0.49449	0.76584	1.47081	0.59699	1.06764	0.89001	1.07518	1.34454	0.69754	1.31745	0.98355	0.62875	1.24741	0.78996	1.16514	0.97377	0.89881	0.48618	0.98782	0.55525	0.70068	1.07011	0.86302	0.73624	0.90101	0.93233	0.98348	0.69134	0.77348
YFR011C	0.59702	0.47947	0.78892	0.64681	0.55812	0.60455	1.17708	1.13585	1.01643	1.11638	1.3565	1.01211	1.23369	0.95293	1.24292	1.30562	0.87856	1.33298	0.27224	1.11264	1.20678	0.82557	0.54752	1.40183	0.86978	0.73776	0.87508	0.98282	0.84264	0.53337	1.8988	1.53017	0.42437	1.20126	0.77468	1.03306	0.59769	1.13437	0.46973	1.41322	1.44365	0.01253	0.63102	0.16693	0.97924	1.12	1.11829	0.63139	1.06163
YAL047C	-1.69528	-1.49282	-1.54927	-1.62227	-1.93036	-1.53694	-1.94601	-1.77488	-1.84122	-1.83029	-1.83909	-1.70767	-2.09846	-2.02178	-2.1666	-1.82583	-2.52285	-1.9784	-2.18988	-1.5758	-1.58201	-1.99696	-2.37265	-1.71656	-2.09367	-2.11724	-1.73104	-1.9395	-1.68683	-1.66751	-1.9248	-1.4195	-1.52156	-1.20268	-1.64833	-1.70438	-2.21416	-1.57945	-2.26597	-1.78648	-1.63334	-2.03495	-1.72153	-1.52628	-1.60256	-1.56486	-2.04664	-1.75072	-1.66259
YER056C-A	4.26195	4.33323	4.53524	4.02632	4.70021	4.12166	5.4873	4.36481	5.41841	5.06053	5.32546	5.16474	5.54953	5.36614	5.62011	5.49097	5.4879	5.51663	5.34335	4.48355	4.98668	4.59143	5.0607	5.18982	4.69063	4.67929	5.06143	4.75572	4.88732	4.92383	5.72922	5.52977	5.11576	5.0103	4.97249	4.85464	5.12229	4.7297	4.89783	4.71641	5.22599	4.58041	5.06075	5.29768	5.2326	4.76254	5.93087	5.04025	5.22943
YBR042C	0.41333	0.43092	0.44175	0.52608	0.59512	0.49124	0.02285	0.14231	0.46222	0.27049	0.25293	0.08651	0.05782	0.32774	0.38834	0.26079	0.32861	0.05329	0.0238	-0.26051	0.42772	0.38744	0.25978	-0.33917	0.17119	0.31552	0.24074	0.32783	0.20073	0.2124	0.35832	-0.21598	-0.16898	-0.51072	0.27796	-0.18976	0.23428	0.22464	0.0613	-0.11642	-0.08557	0.34108	0.14054	-0.14631	0.08366	0.06114	0.38509	0.5007	0.15742
YDR256C	-3.55086	-2.92221	-3.14709	-2.98405	-3.35009	-3.18294	-2.25767	-2.22034	-2.4289	-2.23909	-2.66376	-2.10981	-2.538	-2.1545	-2.26308	-1.64825	-2.49835	-2.06725	-2.70999	-2.45162	-2.4105	-2.08246	-1.90585	-2.37142	-2.2551	-2.41842	-1.82469	-2.15389	-2.70601	-2.25245	-1.98218	-1.8882	-2.3802	-1.28962	-2.56428	-2.29164	-1.58243	-1.60077	-1.62135	-1.96895	-2.47571	-2.40262	-2.59242	-3.08064	-1.7309	-2.63065	-2.49464	-1.45604	-1.91395
YFL065C	2.60171	2.27444	2.67821	2.4489	2.71823	2.43824	1.632	1.68244	1.69471	1.81273	1.74806	1.70696	1.4921	1.10066	1.29089	1.25468	1.59037	1.12659	2.47854	2.89515	1.64865	1.64185	2.25689	2.26235	2.95899	2.6795	1.327	1.31671	2.5041	2.66444	2.4543	1.82399	2.69111	2.37654	2.3082	2.41734	1.6437	1.28137	2.91714	2.86319	1.99144	2.10484	3.19063	2.30108	2.53425	2.68302	1.68779	1.83464	2.15336
YNL287W	2.55999	2.30885	2.4645	2.48882	2.59556	2.63188	2.90515	2.91532	2.82531	2.92263	2.78981	2.7763	3.14363	3.19727	3.28475	3.0564	3.38778	3.13841	2.81015	3.19946	2.6938	2.68611	2.58968	2.88208	2.72168	2.55731	2.73149	2.5735	2.62538	2.6408	2.6807	2.70352	2.52198	2.20162	3.10905	3.11295	2.89542	2.62642	2.68564	2.94879	2.759	2.47736	2.6208	2.30371	2.67301	2.81371	2.8022	2.74676	2.55364
YGR103W	0.23914	0.32961	0.78591	0.79219	0.03022	-0.17221	0.27304	-0.31116	0.44867	-0.0262	-0.03421	0.49928	-0.50879	-0.82256	-0.223	-0.02104	-0.65223	-0.5274	0.06268	0.56254	-1.17965	-0.42879	-0.00355	-0.02818	-0.25488	0.31004	-0.24344	-0.35682	1.0784	0.53309	-0.16203	0.03664	-0.91095	0.02455	0.72063	0.61892	-0.46533	0.07885	0.21348	-0.25284	0.79288	0.77044	0.45025	0.58112	0.04702	0.50916	0.20734	-0.0981	0.03172
YAL065C	-0.02072	-0.24262	-0.2153	0.01881	-0.84022	-0.61731	-2.45155	-2.59964	-2.27146	-2.34626	-2.80709	-2.99942	-0.15555	-0.45	-0.73827	-0.35644	-0.66474	-0.34819	-1.8448	-0.88954	-0.54713	-0.61641	-0.358	-2.11282	-1.69613	-1.64328	0.02073	0.32907	-1.48723	-2.75448	-1.39004	-1.04093	0.68077	0.65193	-1.76959	-1.33975	-1.51885	-2.07275	-1.18706	-1.4571	0.13197	0.06595	0.85454	-0.14631	-1.32341	-2.5002	-3.26769	-1.23519	-1.32558
YLR061W	3.88149	3.47246	3.93391	3.59652	3.95026	3.68967	4.91733	4.12366	4.95024	4.82602	5.03802	4.70626	5.38296	5.06845	5.4553	5.15698	5.23068	4.88796	4.53606	3.69246	4.45932	4.09478	4.40597	4.78771	4.39526	4.07611	4.37179	3.91849	4.32127	4.18523	5.25194	3.48416	3.91822	3.02489	4.21746	4.1592	4.38552	4.21601	4.36481	4.49381	4.76732	4.70804	4.59805	3.86002	4.67556	4.12924	5.03679	4.28889	4.51784
YLR171W	-3.9907	-3.50044	-2.98931	-3.62006	-3.73066	-3.48081	-1.52875	-1.72492	-1.50747	-1.89556	-1.43159	-1.89757	-2.63458	-2.66275	-2.46533	-2.33561	-2.79641	-3.08492	-2.58237	-3.20044	-2.25209	-1.88029	-1.15062	-2.92725	-1.94648	-1.93314	-1.85581	-1.65609	-2.6063	-3.04866	-1.89358	-2.90198	-2.18186	-1.25657	-2.58751	-2.49508	-1.87651	-2.16871	-1.54569	-2.79036	-2.1928	-2.01792	-1.64866	-1.81168	-2.14673	-2.92481	-1.69254	-2.72575	-2.55643
YOR281C	0.23107	0.56429	0.37419	0.45809	0.47808	0.5287	0.16506	0.12784	0.3748	0.29378	0.64989	0.46667	0.58479	0.00362	-0.02163	0.13442	-0.2601	0.16156	-0.15778	0.42538	0.71718	0.20928	-0.08172	0.85533	0.55695	0.35428	0.48829	0.48404	1.13665	0.35519	0.43318	0.53971	0.54932	0.64296	0.41614	0.69864	-0.11555	0.63273	0.03692	0.81998	0.59753	-0.3629	0.47589	0.43567	0.60883	0.77192	0.39984	-0.38825	0.49756
YJL078C	3.23015	3.03202	2.85619	2.78989	3.06127	2.92545	1.95906	1.72752	1.88576	1.74803	2.27153	1.51467	4.08768	3.94075	3.62738	4.01043	3.94464	3.91537	1.8298	0.92549	-1.26503	-0.74066	3.26372	2.93727	-0.95697	-0.84033	1.78884	2.20871	1.90797	3.67416	4.3102	2.95069	3.11421	3.26855	2.76222	3.30225	-1.22569	-1.93441	-1.25575	-1.98254	3.90281	4.94218	3.72637	4.71858	1.86229	3.29709	4.11814	3.15028	3.89304
YBR162C	3.07781	2.90144	2.9492	3.30594	2.91211	2.6812	2.8454	2.51544	2.91018	2.58095	2.77073	2.70605	3.0821	3.06163	2.95172	3.19095	2.98771	3.2023	3.52488	3.27999	2.26735	2.945	3.85358	3.10959	3.36039	3.60352	2.48512	3.20519	3.4096	3.52551	3.37115	2.43281	2.85119	2.59517	3.12584	3.08368	2.87372	3.10413	3.64284	3.09571	3.11107	3.79891	2.91716	3.21071	2.57941	3.13976	3.08753	2.63575	2.59993
YMR114C	-0.96915	-0.9601	-0.8333	-1.0618	-0.76263	-1.14368	-0.85271	-0.72078	-0.97881	-0.62442	-0.7009	-0.60078	-1.14296	-1.2763	-1.27537	-1.38731	-1.49182	-1.19766	-1.45726	-1.05251	-0.70738	-0.35554	-0.87503	-0.88398	-0.63529	-0.36712	-0.4617	-0.69631	-1.13098	-1.0742	-0.53904	-0.33514	-0.68548	-0.55045	-0.86832	-1.0732	-0.91585	-0.72542	-0.76476	-0.86839	-0.74607	-0.92766	-0.59682	-0.41551	-0.86597	-0.80304	-1.13934	-1.14467	-0.94159
YJL152W	-3.92237	-3.15779	-3.54295	-3.50072	-3.70667	-3.50902	-3.87361	-3.87391	-3.92136	-3.93058	-3.69995	-3.76374	-3.38253	-3.40278	-3.50917	-3.6505	-2.03877	-3.62177	-3.20913	-3.20282	-3.11286	-3.30361	-3.32782	-3.70061	-3.64823	-3.74547	-2.68778	-3.15159	-3.50752	-3.60147	-3.28533	-3.28655	-2.71808	-3.81244	-3.37372	-3.49278	-3.20697	-3.11715	-3.35572	-3.00336	-3.56527	-3.66003	-3.33085	-3.1368	-3.41085	-3.34811	-3.52044	-3.09104	-3.27831
YGR251W	-1.54767	-1.59522	-1.24155	-1.80191	-1.37666	-1.3592	-1.70706	-1.94312	-1.79323	-1.6405	-1.75533	-1.18991	-0.95778	-1.33107	-1.32898	-1.41053	-1.61857	-1.55689	-1.30893	-1.2852	-1.56982	-1.53098	-1.51407	-0.70532	-1.4394	-1.18068	-1.5181	-1.84756	-0.79801	-1.32433	-1.6314	-1.33821	-1.36087	-1.10988	-1.2411	-1.43003	-1.51724	-1.26694	-1.18075	-0.9876	-1.35189	-1.44722	-1.22798	-1.11009	-1.46533	-1.36424	-2.11277	-2.10934	-1.50323
YJL067W	-3.90335	-3.23787	-3.67372	-3.20244	-3.55202	-3.59265	-3.75667	-3.18941	-3.6195	-3.68692	-3.90915	-4.28193	-3.99585	-3.51676	-3.93974	-3.82973	-4.01344	-2.95478	-3.33976	-3.28765	-3.80738	-3.1054	-3.15009	-3.86671	-3.32095	-2.30515	-3.09796	-2.83109	-0.99848	-3.3258	-3.12411	-3.77125	-3.42125	-3.00944	-3.30405	-3.69889	-3.13506	-3.38946	-3.3236	-3.45406	-3.54045	-2.92667	-3.39861	-3.77582	-3.51944	-3.63505	-3.64467	-3.91568	-3.64768
YBR094W	0.11071	0.08307	0.11846	0.2104	0.11479	0.13275	0.02817	-0.0297	-0.29365	-0.06315	-0.05331	0.08143	0.22	0.22064	0.21698	0.26336	0.45955	0.35952	0.2344	0.38225	0.11113	0.0911	0.0247	-0.14496	-0.41728	-0.35169	-0.39137	-0.52951	0.21175	-0.10829	-0.54379	-0.06671	0.09577	0.09465	0.30174	0.39492	-0.15481	-0.24795	-0.49822	-0.4758	0.33966	0.35853	-0.14145	-0.04759	-0.03437	-0.00932	0.28742	0.49626	0.09454
YDR118W-A	-1.09398	-1.78623	-1.16716	-1.45	-1.55197	-1.43079	-0.83265	-1.1214	-1.29856	-1.3931	-1.42784	-1.10473	-2.72824	-2.93688	-0.10805	-5.37187	-3.60402	-1.06762	-0.92829	-1.12126	-1.24852	-0.99986	-1.21172	-0.94362	-1.58799	-1.322	-1.11944	-1.49385	-1.65543	-1.62017	-1.12898	-1.12226	-1.19142	-0.99783	-0.86643	-1.02054	-1.17736	-0.99473	-1.42747	-1.39515	-1.60216	-1.33861	-1.19562	-0.80897	-0.94401	-1.07557	-1.84069	-1.42313	-0.95254
YGR065C	-0.98103	-0.88796	-1.1483	-0.93113	-0.61258	-0.46921	0.38178	0.16405	0.24383	0.25948	0.05483	0.20586	-0.63124	-0.64054	-0.81952	-0.60644	-0.78318	-0.95065	-0.47744	-1.08188	0.07728	-0.21264	0.35491	-0.30848	0.70341	0.40144	0.42114	0.19711	-1.30496	-0.44443	0.60642	0.42829	-0.69814	-0.60379	-1.22285	-1.01889	-0.15869	-0.55537	0.42394	0.40294	0.30043	0.51301	-0.44952	-0.18361	-0.96341	-0.66305	-0.41669	-0.52432	-1.04075
YGR031C-A	-3.65544	-3.07151	-3.70106	-3.41102	-4.07314	-3.8267	-3.79969	-3.67055	-3.6709	-3.78494	-3.84105	-3.87643	-3.33324	-3.65421	-3.52596	-3.54009	-3.66117	-3.80875	-3.16475	-3.36613	-3.34583	-3.01821	-2.92947	-3.5303	-2.84216	-2.72089	-2.90108	-2.65306	-2.9664	-3.15313	-3.05512	-3.28123	-3.07237	-2.20151	-3.45005	-3.41319	-2.7096	-3.43923	-3.09165	-3.6379	-3.21081	-3.30958	-2.99048	-2.50057	-3.42395	-3.04584	-3.44646	-3.40687	-3.13211
YGL251C	-2.48071	-2.51005	-2.3589	-2.71236	-2.54131	-2.3744	-2.90445	-2.51592	-2.7774	-2.70122	-2.83346	-2.63911	-3.67643	-3.45634	-3.42012	-3.65787	-3.67012	-3.73658	-2.63848	-2.03055	-2.5988	-2.51518	-2.97834	-1.98382	-3.08494	-2.94805	-2.73514	-2.37156	-2.56896	-2.56106	-2.29805	-2.24673	-2.84586	-3.17852	-2.59071	-2.56331	-3.16953	-2.91692	-3.18766	-2.75252	-2.53018	-2.90346	-2.59601	-2.50424	-2.87312	-2.49919	-3.19154	-2.91146	-2.3135
YOR260W	1.70499	1.59613	1.50008	1.40046	1.56193	1.70455	1.69307	1.53179	1.5495	1.54465	1.67966	1.51834	2.45557	2.3681	2.43158	2.18684	2.43357	2.5487	1.96436	1.51407	1.44458	1.30575	1.39561	2.21266	1.63717	1.24512	1.16758	1.01075	1.61995	1.48297	1.48715	1.57543	1.65867	1.44692	1.70714	2.08804	1.75384	1.50182	1.69678	1.87887	1.73778	1.73972	1.82397	1.42461	1.60466	1.39098	1.51579	1.23823	1.66835
YEL017C-A	4.19875	3.97464	4.17822	4.16625	4.24034	4.17268	4.79613	4.41674	4.64066	3.86743	4.47617	4.49008	4.91035	4.83741	4.81145	5.15401	5.19625	4.82225	4.03811	3.9908	3.90595	4.18566	4.92081	3.52049	4.76675	4.82049	4.30358	4.9701	4.04355	4.40616	4.90338	4.3416	3.71313	3.87892	4.12813	3.67148	4.38659	4.20438	4.38815	3.94052	4.78054	5.5114	4.36965	4.89448	4.44904	4.46434	4.84102	4.42161	4.01856
YKL021C	-0.40854	-0.33728	-0.44858	-0.39334	-0.52646	-0.7918	-0.24338	-0.76673	-0.57915	-0.58943	-0.65672	-0.37771	-0.06037	-0.51513	-0.20257	-0.19167	-0.43223	-0.48706	-0.76979	-0.57911	-0.81608	-0.83853	-0.81158	-0.51089	-0.6462	-0.86543	-0.66141	-0.62513	-0.45043	-0.35146	-1.0314	-0.97417	-0.70038	-1.57214	-0.59297	-0.51534	-0.92458	-0.67803	-0.49922	-0.16952	-0.41206	-0.76784	-0.55665	-0.4262	-0.23344	-0.41769	-0.56914	-0.87431	-0.67945
YKR028W	1.0184	0.97165	0.87448	0.8197	0.9823	1.02865	0.63788	0.80805	0.80223	0.68708	0.63952	0.76691	0.81637	0.86442	0.77309	0.90998	0.87846	0.88546	0.5204	0.99975	0.65496	0.75366	0.73497	1.05284	0.69378	0.73256	0.35686	0.52893	0.57304	0.70505	0.31352	0.3774	0.79692	0.61025	0.67741	0.90985	0.47526	0.77786	0.71215	0.9917	0.615	0.69391	0.71586	0.88802	0.66137	0.82738	0.8286	0.8743	0.75367
YOR374W	3.76492	4.00749	3.63057	3.83241	3.88622	4.03918	4.94596	5.30426	4.47739	4.85436	4.85779	4.99453	3.80043	4.04263	4.16272	4.09988	4.68073	4.32126	4.36752	4.23385	5.003	5.07049	5.08892	4.0726	4.80317	4.92454	5.82036	5.79361	3.48919	3.25957	5.48825	4.69066	4.80693	3.98593	3.92888	4.01827	5.61053	5.09048	4.94774	4.24908	5.01428	5.98589	4.41088	4.62814	5.09825	3.61961	5.04358	5.45684	5.03107
YNR062C	-4.10348	-4.4318	-4.55978	-4.45247	-4.29479	-4.55406	-4.26425	-4.23802	-4.2749	-4.3909	-4.50716	-4.54055	-4.28055	-4.50767	-4.46265	-3.88226	-4.44523	-4.51367	-3.28258	-3.43552	-3.77387	-3.62448	-3.46805	-3.75262	-3.67651	-3.54058	-3.99434	-3.88707	-3.7202	-3.7145	-3.69212	-3.49828	-3.90655	-3.56301	-3.74534	-3.79209	-3.79479	-4.21613	-3.5083	-3.77734	-3.76038	-3.76438	-3.91724	-4.23568	-3.82491	-3.8051	-3.73049	-3.68313	-3.83832
YHL026C	-1.6643	-1.52157	-1.65653	-1.7541	-1.80169	-1.72256	-0.27941	-0.60106	-0.44292	-0.41995	-0.34236	-0.25084	-0.48405	-0.68589	-0.83645	-0.47934	-0.63949	-0.46947	-0.5291	-1.33836	-0.73499	-0.35084	-0.96865	-1.51986	0.27372	-0.0624	-0.27278	-0.73728	-1.07389	-0.49886	-1.30909	-1.0281	-1.01762	-0.91674	-1.18936	-1.62891	-0.36551	-0.51737	-0.85511	-1.3696	-0.52394	0.20757	-0.38455	0.0582	-0.8328	-0.61927	-0.34544	-0.70922	-1.25745
YHR014W	-3.73889	-3.44933	-3.58917	-3.73745	-3.55536	-3.26374	-3.49301	-3.14469	-3.89096	-3.44175	-3.6979	-3.38694	-3.51576	-3.36383	-3.21312	-3.23573	-3.68072	-3.66014	-2.85492	-2.78031	-2.85911	-2.81102	-2.80277	-2.28747	-2.89956	-2.69572	-3.20024	-3.06068	-3.31707	-2.91952	-3.38269	-2.59971	-2.85983	-2.22985	-3.30006	-2.76464	-2.57297	-2.8244	-3.09457	-2.29163	-3.12176	-3.33975	-3.10847	-3.68445	-2.73366	-2.85686	-3.244	-2.60483	-2.44393
YJL102W	-0.11898	-0.17995	-0.17465	-0.12483	0.11307	0.00951	0.75545	0.89099	0.6805	0.75487	0.84333	0.75104	0.37176	0.6336	0.6419	0.5202	0.49778	0.59281	-0.42876	0.21222	-0.28444	-0.27588	-0.01156	0.37368	-0.55169	-0.40627	-0.5199	-0.87607	-0.62837	-0.1312	-0.08358	0.20165	-0.07925	-0.35456	-0.28998	0.10439	-0.10565	0.0135	0.21086	0.61813	0.22239	0.2179	-0.54289	-0.56591	-0.34496	0.21334	0.11833	0.21672	-0.23697
YDL015C	2.87562	2.51024	2.63782	2.95512	2.87471	2.9187	3.07467	3.13293	3.21352	2.91776	3.05378	2.73441	3.4618	3.37712	3.45937	3.42772	3.4696	3.25642	2.68554	2.7365	2.97803	3.18989	3.36125	2.58593	3.12063	3.43506	3.19555	3.41252	2.31469	2.83848	3.20942	1.93244	2.20509	1.58496	2.55343	2.80011	2.99133	2.71269	3.1392	2.76447	3.10983	3.41956	2.98837	2.14135	2.89383	2.813	3.3492	3.36604	2.83346
YCR028C	-0.32681	-0.32049	-0.34043	-0.25424	-0.15904	-0.27816	-0.12698	-0.28308	-0.30129	-0.32499	-0.19215	-0.19253	-0.15704	-0.19495	0.05784	0.1708	-0.03644	0.02458	0.0097	-0.22448	-0.57398	-0.19621	0.45231	-0.61013	0.20931	0.22987	-0.29533	0.17394	-0.48565	-0.13793	0.10441	-0.18733	-0.04188	-0.20188	-0.09211	-0.45097	0.07567	-0.36776	0.23479	-0.6781	-0.08014	0.37822	0.07471	0.29759	-0.70917	-0.58452	-0.22731	-0.35974	-1.0093
YCR016W	-1.01272	-1.56693	-1.01226	-1.25904	-1.25924	-1.37986	-1.50572	-2.00689	-1.31571	-1.46518	-1.10342	-1.40184	-0.95193	-1.8492	-1.79017	-1.75748	-1.92683	-1.64036	-1.90234	-1.05172	-1.32357	-1.71732	-2.14421	-0.8616	-1.81593	-1.93462	-1.28142	-1.45992	-0.84555	-0.93122	-1.31119	-1.98243	-1.7586	-2.69694	-1.39573	-0.93886	-1.79045	-1.22486	-1.86574	-1.04572	-1.05061	-1.56437	-1.00775	-1.52005	-1.12737	-1.14484	-1.75021	-1.98299	-0.85927
YER058W	0.20769	0.30981	0.46232	0.51395	0.74779	-0.28075	0.76698	0.85447	0.62841	0.90203	1.06363	0.74333	1.23776	0.60884	0.87387	0.01553	0.28434	0.9576	0.03841	0.3453	1.19582	0.80258	0.87526	1.62377	0.55193	1.23742	1.20959	1.01111	0.52349	-0.3028	1.34352	1.37859	0.503	0.62817	0.73075	0.68041	0.19962	0.87405	0.61145	1.12935	0.80785	0.13585	0.82715	0.92968	0.49279	0.88566	0.65414	0.02445	0.70898
YER149C	-0.31533	-0.02926	-0.4127	-0.43661	-0.40304	-0.50794	-0.74862	-0.76828	-0.47672	-0.63733	-0.73111	-0.58432	-0.87481	-0.78692	-1.01682	-1.28235	-1.09799	-1.32995	-0.4392	-0.00458	-0.96307	-0.75744	-0.93365	-0.60411	-0.86636	-0.4955	-0.99383	-0.59347	-0.0785	-0.24204	-0.96517	-0.69785	-0.37938	-0.72396	-0.21085	-0.12835	-0.82318	-0.39979	-0.81508	-0.39901	-0.73959	-0.94492	-0.25889	-0.10461	-0.6342	-0.36267	-0.7338	-0.97194	-0.54244
YJL147C	-1.87575	-1.91584	-1.68993	-1.80867	-1.93438	-1.60884	-2.55088	-2.13174	-2.38926	-2.45289	-2.38657	-2.23395	-2.27742	-2.12282	-2.42714	-2.17952	-2.28968	-2.29494	-2.05761	-1.81742	-1.68794	-1.76751	-2.38835	-1.77558	-2.11038	-2.23685	-2.31026	-2.06692	-2.14167	-2.24272	-2.13194	-2.60748	-1.55456	-3.30883	-1.96731	-1.72948	-1.73013	-1.56641	-2.4768	-1.9983	-2.20751	-2.14576	-1.92856	-1.99052	-1.93676	-1.96019	-2.10667	-1.7632	-1.50443
YDL035C	0.59299	0.84995	0.65835	0.74938	0.68687	1.04419	0.61575	0.90166	0.68799	0.83559	0.62911	0.82469	0.08726	0.29229	0.12069	0.17124	0.37575	0.30862	0.31282	0.79806	0.78035	1.00215	0.93213	0.78319	0.82221	0.85162	0.60219	0.92542	0.58546	0.7747	0.53038	0.38375	0.74178	0.59547	0.53304	0.75491	0.80566	1.06183	0.91426	0.70029	0.82507	1.07682	0.3983	0.70206	0.69445	1.01641	0.79326	1.0114	0.54951
YDR533C	1.8297	1.99167	1.93149	2.16825	2.30481	2.29796	3.41728	3.44465	2.89049	3.31779	3.24872	3.2993	1.00967	1.3019	1.49355	2.03889	1.82085	2.1704	1.69317	1.18101	3.35953	3.336	3.07633	2.99892	3.24292	3.35188	3.2193	3.00137	0.8219	1.61135	3.63063	3.35038	2.00077	2.41956	0.92244	0.83954	1.9334	1.74923	2.37891	2.413	1.56271	2.07066	1.45604	1.97016	3.09173	1.82624	2.05255	4.13051	2.61059
YGL222C	0.22251	0.6211	0.12092	0.24919	0.52497	0.26967	0.24788	0.75205	0.60342	0.5837	0.35209	0.97106	0.73368	0.6837	0.75397	0.4547	0.83509	0.20963	0.69152	-0.27411	1.31778	0.86808	0.67415	-0.06466	0.23915	1.04587	1.7309	1.13201	0.30496	0.76883	0.27426	1.26724	0.72187	1.34431	0.90728	0.41192	1.14036	0.35018	0.57873	-0.1122	0.41758	0.8027	0.45677	1.02428	0.71078	0.80785	0.52829	0.56464	0.78307
YDL090C	-0.97505	-0.80371	-0.83708	-0.58909	-0.29263	-0.73931	-0.77486	-0.7253	-0.94336	-0.77838	-1.03491	-0.74395	-0.89837	-0.83105	-0.84816	-0.82755	-0.82335	-0.95137	0.10837	-0.297	-0.32005	-0.40785	-0.10559	-0.68865	-0.40883	-0.33934	-0.18098	-0.48658	-0.35676	-0.65545	-0.53504	-0.27029	-0.70744	0.01986	-0.15608	-0.28808	-0.31822	-0.575	-0.3176	-0.3801	-0.87838	-0.7721	-0.53823	-0.51352	-0.57151	-0.56567	-0.28068	-0.53681	-0.36406
YBR177C	2.97413	2.79854	2.95962	2.9771	3.11136	3.05747	2.68026	2.83509	2.5886	2.55074	2.77974	2.68022	2.72132	2.93267	2.79762	2.47075	3.02663	2.91208	2.87566	2.51867	3.17028	2.95705	3.0389	2.67244	2.7588	2.62965	3.22738	3.23825	2.98113	2.46739	3.14038	2.63654	2.99373	2.27458	2.7692	2.36438	2.96987	2.7219	2.76986	2.70112	2.91792	3.01448	3.30296	2.95543	3.03847	2.67165	2.92422	3.23832	3.38127
YJL034W	5.45999	5.63049	5.44519	6.37214	5.67709	5.75681	6.04505	6.23936	6.07156	6.21062	5.97032	6.05845	6.01354	6.55266	6.27162	5.99737	6.32327	6.38647	5.75535	6.64705	5.44116	5.51827	5.40555	5.50266	5.66148	5.91469	6.23857	6.81173	5.4694	6.6823	6.36034	5.56005	5.14585	5.19422	5.97119	6.20146	5.52661	5.55025	5.52208	5.9637	6.37543	6.55708	5.95408	5.98725	6.09368	6.65573	6.44042	6.50717	6.25095
YML012C-A	-4.12647	-3.7119	-4.01899	-3.9172	-4.02976	-4.04003	-3.07648	-3.4393	-3.51952	-3.35823	-3.49955	-3.0948	-3.75821	-4.56669	-4.1224	-3.9767	-3.82584	-3.60196	-3.19845	-2.86756	-3.84936	-3.43177	-2.52225	-2.9957	-3.17732	-2.70793	-3.51938	-2.76334	-3.76854	-3.6527	-3.00228	-3.17599	-3.75262	-2.70912	-3.53824	-2.77483	-3.62626	-3.90588	-2.30702	-2.62822	-3.25689	-2.55053	-3.86858	-3.17568	-2.97875	-3.03574	-3.52308	-2.85052	-3.61538
YNR059W	-0.88992	-0.64292	-0.77807	-0.80543	-0.47445	-0.65284	-0.98519	-1.12941	-1.16431	-0.94318	-0.92123	-1.06521	-1.21534	-1.09653	-1.32597	-1.17577	-1.13801	-1.2543	-0.75701	-0.89757	-1.09942	-0.9625	-1.34791	-1.21136	-1.02352	-1.38813	-1.42293	-1.08741	-0.77986	-0.36834	-0.68212	-1.298	-1.13147	-1.17438	-0.42842	-0.57108	-1.08899	-0.88556	-1.12638	-1.18865	-0.93854	-0.68205	-0.91964	-1.07234	-1.35171	-0.59312	-1.38533	-0.94872	-1.17631
YOR034C-A	-0.55625	-0.94807	-0.84053	-0.46796	-1.22665	-0.51969	-0.1693	-0.48381	-0.40954	-0.54777	-0.52777	-0.80958	-0.60084	-0.52306	-0.38331	-0.33879	-0.15027	-0.45382	-0.95282	-0.58568	-0.73641	-0.45563	-0.61963	-1.10618	-0.46113	-0.19026	-0.37733	-0.23054	-0.46895	-0.38829	-0.42836	-1.24556	-1.4182	-3.17769	-0.55463	-0.6888	-0.62879	-0.51025	-0.69833	-1.01275	-0.02055	-0.10511	-0.43466	-0.95465	-0.15218	-0.28264	-0.81863	0.24221	-0.68179
YGR156W	0.17863	0.25744	0.23362	0.17824	0.1757	0.25638	0.33788	0.33113	0.28717	0.21711	0.35028	0.29826	0.76734	0.64572	0.4935	0.40195	0.5972	0.67567	0.42282	-0.00947	0.3143	-0.15843	0.53066	0.58321	0.36973	0.10076	-0.19626	-0.07588	0.28412	0.07928	-0.32735	-0.06441	0.72278	0.62727	0.28953	0.23419	0.34765	0.44879	0.55855	0.5645	0.25496	0.33435	0.68605	0.16204	0.34646	-0.0106	0.22872	0.26374	0.78966
YLR066W	1.3754	1.67616	1.3193	1.61268	1.61976	1.57804	1.4569	1.33271	1.3123	1.36035	1.52086	1.24787	1.62511	1.56442	1.67978	1.6882	1.57814	1.83043	1.3021	1.61326	1.18896	1.22334	1.30481	1.50202	1.33498	1.62762	1.1267	1.68268	1.24859	1.22985	1.5025	1.06721	0.81288	0.59712	1.35725	1.32711	1.21886	1.17484	1.28595	1.53605	1.65445	1.22234	1.12942	0.6665	1.80688	1.50952	1.20193	1.35752	1.1605
YBR125C	0.65642	0.90691	0.69521	0.69828	0.59793	0.53295	1.15709	1.11687	1.10563	1.21084	0.92991	1.25162	0.94816	0.94749	1.05847	0.9157	0.88639	1.04767	1.02459	0.43297	0.56306	0.76957	1.1895	0.41148	1.16833	1.18715	0.70901	0.79453	0.65429	0.67589	1.27115	1.01609	1.37731	1.41168	0.97859	0.83574	1.32971	1.15993	1.27733	0.93546	1.01287	1.18464	0.97629	1.12337	0.9206	0.79797	0.71031	0.86792	0.64889
YOR376W	-4.87695	-4.06193	-4.79055	-5.05987	-4.92132	-4.72519	-4.93364	-4.27043	-5.02419	-5.11333	-5.00241	-5.20877	-4.72347	-4.96252	-4.84517	-4.88533	-4.92449	-5.10267	-3.95271	-4.06873	-4.15274	-4.5623	-4.15887	-4.03993	-3.93752	-3.91675	-3.87135	-4.22755	-3.81158	-4.00178	-3.91217	-3.76197	-3.80448	-4.13686	-3.94675	-3.94377	-3.93147	-3.92367	-4.18973	-4.03727	-3.81309	-4.01564	-4.10548	-3.95603	-4.07012	-4.10679	-4.12471	-4.16057	-3.86283
YBR173C	3.4152	3.34494	3.42039	3.49589	2.9851	3.65438	4.12848	3.82787	3.75103	3.79672	3.94567	3.87564	4.38212	4.55651	4.69146	4.20079	3.91136	4.31072	3.41149	3.45807	3.7421	3.88655	3.7428	3.5115	3.74762	4.22565	3.83136	3.89891	3.55133	4.2954	3.92527	4.10708	3.23682	3.12081	3.60699	3.57848	3.89405	3.747	3.67763	3.73411	3.34042	3.62294	3.81698	3.57624	4.0828	4.25169	3.43558	3.5176	3.82616
YCL023C	-4.40968	-4.7843	-4.54353	-4.94088	-4.6833	-5.30071	-4.46411	-4.6507	-4.63077	-4.5523	-4.76391	-5.14652	-4.45172	-4.83793	-4.481	-5.1963	-4.96279	-4.18942	-4.01981	-3.77386	-4.13522	-4.03624	-4.23097	-4.3928	-4.04281	-4.17071	-4.0174	-3.88488	-3.96395	-3.88136	-3.81843	-4.2562	-3.92396	-3.8382	-3.86498	-4.29043	-4.02242	-4.14116	-4.04562	-4.17059	-3.8561	-3.90979	-4.25514	-4.12572	-4.02468	-4.55933	-4.04387	-4.24284	-3.90316
YHR057C	1.282	1.36949	1.27421	1.31522	1.09568	1.29462	1.23524	1.3317	1.32987	1.3239	1.39437	0.9921	1.76	1.46358	1.63589	1.76873	1.92745	1.57072	0.51803	0.96385	1.4266	1.80134	1.24186	0.93258	1.21216	0.92581	1.43961	1.58927	0.99396	1.15838	1.09736	0.98533	1.38066	1.12302	0.98493	0.93286	0.97032	1.22352	1.39318	1.37043	1.2655	1.50925	0.80002	1.34925	1.13551	1.18764	1.76023	1.3541	1.14192
YAL051W	0.32886	0.18412	0.65678	0.50346	0.14219	0.423	0.38178	0.21613	0.42835	0.30361	0.36969	0.40214	0.05327	0.19947	0.11537	0.09387	-0.01944	0.09759	0.54595	0.48864	0.70885	0.54032	0.28542	0.24713	0.50212	0.61394	0.73189	0.4846	0.6923	0.58956	0.17099	0.25017	0.35174	-0.303	0.47124	0.58019	0.73993	0.67497	0.25835	0.31534	0.59043	0.511	0.55446	0.29521	0.868	0.76986	0.71387	0.90658	0.90808
YOL162W	-3.44172	-3.21452	-3.22402	-3.10977	-3.27646	-3.16039	-5.1368	-5.27376	-4.98233	-5.03062	-5.05283	-5.2401	-3.09705	-2.95024	-3.09314	-2.89984	-2.9402	-3.16167	-2.1877	-2.46661	-4.30571	-4.0922	-4.15887	-4.18187	-4.37273	-4.51278	-4.11572	-4.26268	-2.97626	-4.00178	-4.08049	-4.44802	-3.87301	-4.07557	-3.08577	-3.0099	-3.41601	-3.66429	-4.09222	-4.20775	-3.05132	-3.42769	-3.41193	-3.80531	-3.28405	-4.13538	-4.32443	-3.78852	-2.89889
YOR077W	-1.76598	-1.42989	-1.63573	-1.45682	-1.12736	-1.51537	-1.66074	-1.52158	-1.80467	-1.43301	-1.5347	-1.33416	-1.38746	-1.64397	-1.63354	-1.34852	-2.17329	-1.68812	-1.83749	-1.50937	-1.14631	-1.34747	-1.75457	-1.28618	-1.23797	-1.23608	-0.95251	-1.44033	-1.28393	-0.98474	-1.50822	-0.53833	-0.9645	-0.2313	-1.48771	-1.4341	-1.63224	-0.85278	-1.43247	-1.23329	-1.25035	-1.93894	-1.19229	-1.04731	-1.86768	-1.13928	-1.89538	-1.88059	-0.99426
YLR234W	-2.26236	-1.96212	-2.27449	-2.09703	-2.17194	-2.21586	-1.78666	-1.78845	-1.65765	-1.62359	-1.76634	-1.41923	-2.15865	-2.40099	-2.46652	-2.03517	-2.43281	-2.31409	-1.61703	-1.89363	-1.55019	-1.77333	-1.84809	-1.72534	-1.80428	-1.82071	-1.82043	-2.02007	-1.76414	-1.4228	-1.97623	-1.31229	-1.36036	-0.45043	-1.57968	-1.83432	-1.36056	-1.60749	-1.2889	-1.52277	-1.67225	-1.03881	-1.24457	-0.89182	-2.01944	-1.6917	-1.96376	-1.7036	-1.78522
YDR198C	-1.176	-1.2592	-1.24213	-1.24416	-0.96645	-0.99633	-1.34745	-1.29963	-1.11438	-1.24218	-1.29927	-1.0089	-1.483	-1.10571	-1.29593	-1.39717	-1.19387	-1.35982	-1.05907	-1.22972	-1.07637	-1.42118	-1.52907	-0.98598	-1.52858	-1.5547	-1.30114	-1.37186	-0.83572	-1.11012	-1.57451	-1.84802	-1.41891	-2.82048	-1.12313	-1.18197	-0.93268	-1.27018	-1.38654	-1.0571	-1.37412	-1.33578	-1.30009	-1.40648	-1.13252	-1.08476	-1.62079	-1.38354	-0.94847
YJR124C	-0.21516	-0.15198	-0.37987	-0.24385	-0.17286	-0.20867	0.11653	-0.06758	0.06446	-0.2385	0.14396	0.03091	0.41743	0.36283	0.23049	0.36728	0.5127	0.24609	-0.28857	-0.97289	-0.7622	-0.40096	0.14032	-0.52182	0.16892	-0.28576	-0.07058	-0.24305	-0.66311	-0.14916	-0.0249	-0.12955	-0.31513	-0.33639	-0.17217	-0.41329	-0.06403	-0.59539	0.16499	-0.50269	-0.04348	0.72906	-0.06241	-0.30317	-0.53753	-0.63665	-0.07748	-0.2836	-0.45326
YHR107C	1.44183	1.3851	1.39395	1.29111	1.30042	1.50006	1.35963	1.30159	1.16293	1.3303	1.34883	1.32914	1.43901	1.48199	1.55766	1.29354	1.49429	1.4767	1.16745	1.61472	1.33172	1.22067	1.07582	1.68146	1.01555	1.02762	0.89983	0.82107	1.36905	1.25512	0.74275	1.44488	1.57946	2.3171	1.29549	1.58938	1.11612	1.42823	1.34497	1.67969	1.14482	0.97836	1.07224	1.36591	1.44115	1.42345	1.41672	1.19879	1.5531
YLL066C	3.35738	3.3081	3.39254	3.26493	3.56304	3.38429	2.05108	2.2092	2.19652	2.17896	2.2477	2.33427	2.09454	2.08278	1.9067	2.05432	2.05472	2.04322	2.95295	3.35447	1.9673	2.18263	3.0807	3.00584	3.15748	3.26781	2.29882	2.29136	3.08991	3.3278	2.68492	3.13649	2.82462	2.94908	3.02981	3.00579	2.11564	2.19852	3.35682	3.0577	2.62951	2.90434	3.44481	3.64463	2.20858	3.42129	2.60266	2.52371	3.11066
YER112W	1.03331	1.2124	0.93938	1.09585	0.29205	1.09707	0.71369	0.89887	1.10969	1.14524	1.31212	0.80308	1.53365	0.58562	1.16894	0.83217	0.7413	1.13214	0.14927	1.6707	0.6407	0.37973	-0.09208	1.60231	0.75444	0.65046	0.58985	0.81666	1.39593	1.29247	0.94295	0.96746	0.98015	0.15272	0.84503	1.31434	0.35288	1.26208	0.28263	1.66394	0.96906	0.03194	0.85524	0.27734	1.40813	1.40039	0.98121	0.6268	0.91418
YLR174W	-2.19848	-1.90911	-2.20072	-2.00204	-1.82126	-1.78706	-1.59569	-1.62935	-1.71968	-1.52556	-1.86809	-1.52174	-1.38963	-1.20148	-1.39237	-1.07042	-1.27527	-1.16193	-2.03797	-1.88176	-1.55788	-1.59303	-1.7303	-1.79915	-1.70134	-1.62767	-2.20216	-2.02295	-2.28633	-2.02119	-1.76768	-1.15499	-1.09166	-1.04318	-1.88863	-1.70861	-1.65124	-1.44778	-1.33218	-1.42202	-1.60986	-1.32851	-2.03319	-1.41046	-1.94396	-1.94563	-2.33308	-1.54401	-1.69947
YCL026C-A	-3.39912	-2.32568	-2.90764	-2.80463	-2.77906	-2.71359	-1.73966	-1.81635	-1.71831	-2.1497	-1.91852	-1.50639	-3.39407	-3.40614	-3.65514	-3.54206	-3.57867	-3.51972	-1.17374	-1.47303	-2.15568	-2.12959	-1.48408	-1.83102	-1.42733	-1.12724	-1.66185	-1.46297	-1.22478	-1.06893	-1.27982	-1.1275	-2.03483	-1.21407	-1.17334	-1.44884	-2.47435	-2.85813	-2.8862	-2.70003	-2.12658	-2.09851	-1.48443	-1.01782	-2.5556	-1.52287	-2.52742	-2.07318	-1.46706
YCR018C-A	1.90695	-0.0575	1.15385	1.21914	1.9792	1.7343	0.23626	-0.37167	0.32744	-0.67765	-0.57122	-1.02576	0.40384	0.12999	0.95729	0.96297	0.61055	1.12583	-1.86341	-1.85112	-2.00651	-1.59364	0.09858	-1.41848	-0.95697	-0.6828	1.07214	1.36372	-2.51759	0.34346	0.89517	-0.03799	-2.62327	-2.52338	-0.11024	0.2944	-2.089	-3.09581	-1.70672	-1.72464	0.6335	0.59069	1.23736	0.26111	1.93741	1.27871	0.41705	1.05524	0.08309
YGR108W	-1.34597	-1.27091	-1.18272	-0.86439	-0.77232	-0.92106	-1.27173	-1.39059	-1.36698	-1.2811	-1.22045	-1.2461	-1.19808	-1.17796	-1.13391	-1.16556	-1.04362	-1.14743	-1.02536	-0.87413	-0.90542	-0.91236	-0.97304	0.05011	-1.07959	-0.83798	-1.27812	-1.43615	-1.2519	-0.74415	-1.57397	-1.12439	-1.23298	-1.40509	-1.22993	-0.86817	-1.04426	-0.84473	-0.64908	0.18326	-1.66391	-1.47877	-1.99696	-1.1987	-1.03032	-0.52271	-1.04204	-1.70155	-1.14057
YDR346C	1.31904	1.26806	1.45963	1.40775	1.47279	1.41009	1.37803	1.52552	1.48526	1.48393	1.48702	1.68139	1.01641	1.50174	1.62422	1.70589	1.40428	1.32888	1.53732	1.93628	1.05598	1.12427	1.15094	1.54346	1.19649	1.47433	1.16794	1.13728	1.67042	1.34214	1.46338	1.51153	0.90454	1.40814	1.73894	1.84954	0.93742	1.22971	1.24061	1.46044	1.28423	1.16041	1.29338	1.10145	0.90779	1.45498	1.60976	1.85184	1.49436
YDR091C	0.75235	0.70326	0.83904	1.02579	1.11607	0.88305	1.42968	1.0086	1.31611	1.30183	1.23362	1.33441	1.98752	1.88047	1.88316	2.13104	1.95404	1.77677	0.85386	0.55752	0.59851	0.41006	1.2971	1.38285	1.0225	0.1427	1.00517	0.51252	0.72742	1.37957	1.01867	0.5124	0.33572	0.37087	1.16366	1.07002	1.26927	0.57409	1.35083	1.42653	1.199	1.49771	1.2314	0.57861	0.78445	0.99811	1.32039	0.82137	1.06445
YKR092C	0.09004	0.00465	0.41853	0.38546	0.38594	-0.028	1.07002	0.28653	0.80402	0.6798	0.72835	0.92422	0.87528	0.12788	0.49229	0.52074	0.4521	0.01237	0.75895	0.16337	0.37794	0.32403	0.78434	1.22427	0.53768	0.52914	0.84365	0.84652	0.63703	0.45078	0.81249	1.02013	0.41555	1.54569	0.51987	0.51347	0.58298	0.42809	0.97193	0.88383	1.2124	1.29698	1.09141	0.98981	0.52042	0.30421	0.87119	-0.20243	0.81095
YLR269C	-3.34351	-5.09354	-3.63072	-4.81959	-3.38584	-4.82037	-4.23279	-4.60538	-4.22908	-4.69637	-4.34686	-4.53518	-3.48388	-4.8496	-3.51964	-3.80201	-3.50996	-4.2581	-3.71076	-3.74611	-3.30584	-4.24632	-3.0463	-3.45469	-2.93152	-3.97277	-3.21478	-3.92307	-2.94097	-3.89094	-3.89214	-4.21233	-3.10172	-2.8356	-3.03161	-3.65675	-3.64916	-3.60983	-3.49831	-4.06644	-3.29418	-3.53371	-2.90434	-4.12687	-3.3214	-4.03968	-2.93302	-4.0698	-3.43683
YER165C-A	-4.41205	-4.57295	-4.6042	-4.46842	-3.72486	-4.66989	-4.44757	-4.4732	-4.33226	-4.74091	-4.69805	-4.72941	-4.52469	-4.6006	-4.53491	-5.16061	-4.68501	-5.20486	-4.18659	-4.25437	-3.84041	-4.15311	-4.01174	-4.17843	-3.97751	-4.10166	-3.78557	-4.21753	-3.20236	-4.22753	-3.86513	-4.04433	-3.75909	-3.91093	-3.62025	-3.98306	-3.4011	-3.70801	-4.26523	-4.28082	-3.95588	-3.63446	-3.18953	-3.902	-3.38313	-3.85243	-3.61268	-3.83698	-4.31192
YLR117C	-0.6721	-0.75528	-0.91158	-0.88859	-1.08374	-0.90959	-0.98032	-0.80227	-1.08884	-0.61267	-1.13432	-0.71859	-1.0883	-0.95718	-0.78976	-0.83198	-1.16472	-1.07396	-1.68666	-0.62908	-1.20736	-1.00197	-1.48337	-1.12749	-1.08485	-0.80097	-1.12738	-0.96456	-0.82999	-0.93045	-1.40831	-0.93967	-1.31513	-1.29943	-1.15579	-0.94849	-1.32313	-0.65766	-1.25821	-1.0011	-0.99175	-1.13232	-0.90089	-1.1086	-1.13652	-0.63638	-1.54859	-0.95559	-1.18263
YEL069C	-4.38817	-4.38962	-4.35316	-4.23478	-4.49348	-4.42154	-4.59624	-4.28841	-4.6537	-4.53942	-4.60558	-4.41016	-3.96711	-3.69303	-3.92588	-3.55605	-3.77967	-3.92489	-3.85537	-3.8245	-3.72913	-4.02188	-3.92309	-3.88974	-3.69959	-3.71367	-3.81778	-3.9571	-3.58632	-4.08531	-3.82888	-3.83144	-4.0265	-3.77346	-3.51605	-3.86808	-3.94892	-3.92367	-3.96134	-4.00979	-3.81309	-3.75879	-3.76049	-3.91561	-3.88794	-3.68485	-3.87836	-3.7741	-3.86283
YLR385C	-0.9398	-0.71351	-0.81319	-0.72689	-0.93162	-1.22952	-1.13967	-0.98724	-1.02505	-1.18014	-1.18029	-0.73283	-1.14269	-0.66851	-0.93692	-0.55151	-1.06693	-1.11472	-0.50611	-0.90453	-1.44147	-1.18835	-0.41844	-1.00845	-1.10622	-0.97501	-1.14916	-0.88739	-0.39961	-0.71062	-1.59197	-0.41848	-0.56343	0.46138	-0.49432	-1.06194	-0.90382	-1.10316	-0.42191	-1.25839	-1.1735	-1.12374	-0.52865	0.53731	-1.50704	-0.98159	-1.11782	-1.77008	-1.05632
YBR250W	-3.35498	-3.15912	-3.01973	-3.16083	-3.27139	-2.99774	-3.66358	-3.52502	-3.72079	-3.48865	-3.57274	-3.64241	-3.85455	-3.87786	-3.83695	-3.72266	-3.74282	-3.77605	-2.61055	-2.48425	-3.1928	-3.22552	-3.1399	-2.87611	-3.09284	-2.92019	-3.34315	-3.18199	-2.56655	-2.76476	-3.22489	-2.88379	-2.93076	-3.52502	-2.90053	-2.91448	-3.0188	-2.93	-3.20368	-2.89556	-2.92258	-2.92695	-3.09251	-3.2594	-3.10831	-2.83888	-3.47569	-3.02271	-2.87534
YDR143C	1.54917	1.24477	1.5878	1.30768	1.11677	1.36434	1.31653	1.43777	1.12198	1.42139	1.32618	1.39876	1.89847	1.87163	1.95615	1.5309	1.79561	1.797	1.66065	1.30224	1.4879	1.34352	1.67551	1.71719	1.48514	1.52549	1.37959	1.17881	1.19337	1.18545	1.41017	1.42	2.0971	1.37504	1.58204	1.4641	1.88974	1.62281	1.63784	1.81844	1.57362	1.7465	1.80815	1.52616	1.74063	0.84427	1.64292	1.29021	1.49281
YER185W	-3.45873	-2.64962	-3.25573	-2.98397	-3.43047	-2.90793	-3.25102	-3.49514	-3.23301	-3.27169	-3.35024	-3.41411	-2.8156	-2.59942	-2.91943	-2.02124	-2.74416	-2.36408	-2.87639	-3.0501	-3.46285	-3.55591	-2.74673	-2.89271	-2.79622	-2.92411	-3.31395	-2.66745	-3.36421	-2.59949	-3.3149	-3.23812	-3.25066	-2.02443	-3.22497	-3.06124	-2.98243	-3.44323	-2.677	-2.70428	-2.61997	-2.97541	-3.1237	-3.60761	-2.52948	-2.47419	-3.42523	-2.98774	-2.75655
YGL007W	-4.60132	-4.53066	-4.51477	-4.76452	-4.64464	-4.53888	-4.53778	-4.64164	-4.629	-4.36386	-4.46345	-4.81813	-4.30096	-4.35075	-4.59972	-4.72528	-4.29167	-3.95223	-3.49341	-3.41419	-4.21893	-3.8165	-3.68219	-4.07041	-3.90999	-3.78432	-4.07931	-3.69184	-3.67936	-3.88893	-4.06208	-2.11132	-3.75222	-3.99759	-3.88767	-3.72052	-3.6729	-3.85873	-3.72799	-3.83297	-4.31438	-3.60906	-4.60032	-4.11293	-4.0499	-4.46546	-4.18428	-4.01397	-4.16428
YAL031C	0.2966	0.35553	0.37035	0.50717	0.38323	0.29762	0.3784	0.27575	0.16027	0.15304	-0.08427	0.16693	-0.04894	0.07154	0.14455	0.09962	0.17113	0.06454	0.42803	0.34674	0.48432	0.33765	0.25538	-0.24892	0.279	0.41854	0.54675	0.47497	0.48872	0.28789	0.21781	0.0881	0.43523	-0.42422	0.32024	0.13918	0.20022	0.08443	0.08796	-0.10351	0.18193	0.39258	0.19997	0.19085	0.34288	0.17541	0.43236	0.53517	0.0099
YOL013C	1.55558	1.75174	1.52231	1.76785	1.25559	1.29124	1.31515	1.32028	1.21637	1.32592	1.16859	1.21723	1.27296	1.28884	1.41041	1.38571	1.51292	1.5206	1.12346	1.4404	1.12154	1.46616	1.15865	0.60351	1.42432	1.41447	1.57819	1.7401	1.55964	1.52834	1.09989	1.31481	1.20463	0.98901	1.43554	1.41355	1.2825	1.21035	1.14186	0.78951	1.18405	1.36546	1.58629	1.30644	1.08303	1.76656	1.42777	1.83244	1.24118
YGR139W	-4.01135	-4.5019	-4.11645	-4.25632	-4.56062	-4.26724	-3.36588	-4.90012	-2.7868	-2.90827	-4.27665	-4.62059	-4.35803	-3.22776	-2.93921	-4.62726	-4.05549	-4.92382	-3.43587	-3.35153	-4.08535	-4.00655	-3.79091	-3.08325	-3.17939	-3.73497	-4.29128	-3.93707	-3.72427	-3.88147	-3.83108	-3.69362	-4.0787	-1.9183	-3.92937	-3.29479	-3.46027	-3.79377	-3.73503	-4.04701	-3.93156	-3.61575	-3.94963	-3.35527	-3.73704	-3.40989	-2.50916	-3.15433	-3.93824
YLR089C	1.3208	1.15802	1.19256	1.31086	1.38099	1.29232	1.78123	1.90865	1.72537	1.87388	1.80086	1.70451	1.83855	1.62163	1.62505	1.67086	1.92975	1.93937	1.69501	1.2108	1.78882	1.87589	1.96271	1.54462	1.84494	1.49783	1.96108	1.85756	0.88573	1.38576	1.93813	0.98435	1.32843	0.3733	1.75171	1.50539	1.90671	1.54617	1.66722	1.64038	1.86541	2.12576	1.50849	1.52447	1.63348	1.16387	1.57429	1.71564	1.39783
YKL155C	-0.28398	-0.41134	-0.32427	-0.48109	-0.02895	-0.22474	0.10482	0.21048	0.28451	0.18896	0.22144	-0.03421	0.40964	0.49811	0.43038	0.31139	0.3933	0.40251	-0.92256	-0.1644	-0.30803	-0.57289	-0.28408	0.59013	-0.82642	-0.87899	-0.57514	-0.74381	-0.90862	-0.74073	-0.50433	0.10387	-0.5797	0.05378	-0.76537	-0.03828	-0.67422	-0.34599	-0.36534	0.52494	-0.31976	-0.6917	-0.92117	-0.79268	-0.44449	-0.08224	-0.26714	-0.52432	-0.19655
YKL222C	-1.41827	-1.06896	-1.32131	-1.364	-1.10757	-1.11995	-1.11837	-0.72622	-1.26933	-1.06178	-1.16042	-0.85209	-1.83321	-1.33998	-1.60061	-1.1379	-1.4495	-1.75492	-1.17747	-1.50249	-1.15971	-1.15052	-1.37739	-1.42214	-0.85778	-1.17563	-1.3552	-1.7651	-1.11183	-1.406	-0.72873	-0.80962	-1.10244	-1.71158	-1.08595	-1.43167	-0.83075	-1.03035	-1.05904	-1.25736	-0.90511	-0.83255	-0.97244	-1.11646	-1.24465	-1.45407	-0.98244	-0.95311	-1.35468
YGR154C	-1.63105	-1.52307	-1.76971	-1.71989	-1.4291	-1.34397	-1.46037	-1.15217	-1.54751	-1.36368	-1.5114	-1.33664	-1.34785	-1.20354	-1.50469	-1.44649	-1.40948	-1.72631	-1.18296	-1.31569	-1.37929	-1.20931	-1.59293	-1.78694	-1.71544	-1.49545	-1.47521	-0.98828	-1.88869	-1.7821	-0.97001	-1.15714	-1.24563	-1.52996	-0.97092	-1.20856	-1.2534	-1.09592	-1.37441	-1.38633	-1.51566	-1.41059	-1.85563	-1.45659	-1.43817	-1.47819	-1.59608	-1.10532	-1.53127
YNL277W	-3.21656	-2.92452	-2.84444	-2.95953	-2.8572	-2.91275	-0.91477	-0.73805	-0.99624	-0.79623	-0.62671	-0.9076	-2.92786	-2.90932	-3.17138	-2.78594	-3.05921	-3.20783	-0.25076	-1.06667	-1.18452	-1.31695	0.22476	0.73063	-0.89872	-1.67843	0.11098	0.26615	-1.72963	-1.24633	0.79524	0.76261	-0.13178	-0.25973	-0.59293	-0.85328	-1.40785	-1.89588	-1.3954	-0.30209	-1.13855	-1.1715	-1.89997	-1.42683	0.02514	-0.1127	0.36831	-1.32634	-1.05565
YOL061W	1.24066	1.20217	1.09497	1.32924	1.32362	1.04027	1.55901	1.42888	1.55041	1.37879	1.54352	1.57096	2.13284	2.04275	1.84645	2.33171	2.10492	1.95742	1.52753	0.92082	1.28751	1.40111	1.91607	1.44266	1.49879	1.27962	1.37519	1.50493	1.11153	1.6197	1.63271	1.50062	1.42978	1.24435	1.48514	1.32017	1.63074	1.05872	1.85915	1.33203	1.46188	1.92406	1.59048	1.62091	1.04427	1.33722	1.65057	1.06181	1.37383
YDL014W	1.80211	1.5486	1.80025	1.84656	1.61673	1.43829	2.29253	1.58822	2.32207	2.06665	2.04974	2.09617	2.74459	2.41115	2.4697	2.94157	2.8483	2.43784	2.21702	1.39468	1.64132	1.54144	2.4437	2.71779	2.20429	1.33589	1.76563	1.49975	2.01696	2.00051	2.22886	1.51441	1.77676	2.39442	2.01757	1.87719	1.81307	1.32131	2.79681	2.55163	2.33118	2.9366	2.287	2.17542	1.30485	1.47779	2.24949	1.002	1.9974
YFR013W	0.19303	-0.04716	0.13336	-0.18809	0.38812	0.14511	-0.13595	0.09263	-0.08528	-0.11199	-0.15673	-0.06254	-0.18891	0.06901	-0.04851	-0.18764	0.04619	-0.16625	0.12568	0.34328	-0.06521	-0.08798	-0.52141	-0.1406	-0.41728	0.03165	-0.45738	-0.58507	-0.01541	-0.40064	-0.48988	-0.27606	0.16104	-0.23249	0.11248	0.07764	-0.10101	-0.04806	-0.37213	-0.07082	-0.48985	-0.40709	-0.49535	-0.14094	-0.07098	-0.36454	-0.09765	-0.1613	-0.01525
YCL064C	3.41372	3.29253	3.42103	3.439	3.39479	3.73933	3.70442	3.50432	3.19927	3.39544	3.62264	3.28202	4.29099	4.7164	4.70242	4.07934	4.73019	4.53815	3.47167	3.64074	3.66547	3.35512	2.65389	3.16981	3.28509	2.91845	3.27079	2.93481	3.66899	3.2369	3.23979	3.34294	2.88649	2.44421	3.6703	3.61633	3.55797	3.4164	3.09019	3.03868	2.11406	1.67329	3.45459	2.927	3.32061	3.35197	2.81204	1.05031	3.66064
YDR493W	-0.57645	0.01774	-0.31721	-0.27833	0.27576	0.03475	0.73222	0.73197	0.67322	0.8071	0.72652	0.68493	1.07487	0.72641	0.89658	1.26556	0.90577	1.39182	0.31959	-0.2241	0.63113	0.41266	0.38639	0.62253	-0.30871	-0.06712	0.57251	0.33149	-0.08959	0.51038	0.5089	1.18397	0.46308	0.55066	0.12509	0.19049	0.5456	0.19899	-0.01678	0.32685	0.02192	0.09056	-0.18964	0.4549	0.09464	0.13025	0.49114	0.23461	0.33504
YLR345W	0.91572	0.96432	0.90801	0.73992	0.62936	1.01218	1.04405	1.32799	1.14836	1.18461	0.99191	1.14078	0.09953	0.48663	0.75782	0.62907	0.72449	0.78614	0.80984	1.23009	1.30535	1.07918	0.64918	0.54292	0.95981	1.02457	0.78556	0.98983	0.82799	0.26132	0.82867	0.84588	1.07427	0.61614	0.68175	0.86013	0.78695	1.20335	0.74924	0.90022	1.04085	0.46088	0.53557	0.64557	1.21218	0.81919	0.98789	1.12509	1.04799
YGL022W	2.31366	2.3177	2.08916	2.4107	2.44713	2.33959	2.53972	2.55842	2.60901	2.45276	2.71322	2.4396	2.90637	2.75909	2.77264	2.82501	2.94571	2.94956	2.58276	2.35181	2.31444	2.49531	3.00728	2.55747	2.91314	2.43314	2.48249	2.23433	2.17481	2.69067	2.4181	2.59781	2.7543	3.16248	2.69813	2.53405	2.63531	2.36112	2.86856	2.57856	2.46491	3.05933	2.44605	2.9605	2.29223	2.53863	2.77963	2.36671	2.19162
YLR192C	2.59304	2.64373	2.57548	2.51585	3.04551	2.79737	3.06987	3.01884	2.90795	3.0552	3.25767	3.05894	3.65024	3.38383	3.64173	3.12299	3.40748	3.41957	3.08582	3.47542	3.23008	2.74155	2.44344	3.50269	2.61303	2.89505	2.76386	2.25689	3.00475	3.11089	2.38767	3.06324	2.93697	2.82245	3.06989	3.43365	2.71079	3.17518	2.95162	3.41549	2.62424	2.52068	3.28267	2.90248	3.05146	3.35406	3.10501	2.61719	3.09685
YOR265W	0.05905	-0.15312	0.41321	0.15182	-0.04797	0.26491	0.63461	0.35546	0.6656	0.49437	0.67864	0.37434	1.24999	0.76957	1.13002	0.85173	1.06827	0.9659	0.18077	0.39842	0.99611	0.29344	-0.24155	0.1863	0.36521	0.60282	0.09181	0.40382	0.62613	0.88774	0.0829	0.20145	0.01497	0.52824	0.64251	0.70762	0.44648	0.16169	0.36218	0.61385	-0.19003	-1.07448	0.00236	-0.17413	1.01821	0.82788	0.62135	0.51029	0.50527
YCL019W	4.86141	5.38704	4.74476	5.05699	4.9068	5.13997	3.50433	4.19289	4.354	3.72544	3.58237	4.10507	1.32555	1.16975	1.04584	0.79634	0.9794	1.03627	5.31219	6.35669	5.00812	4.3163	4.5884	5.76434	4.80923	4.94005	4.96982	4.59326	5.4661	5.61266	3.37189	3.88269	5.68768	5.3526	5.44087	5.31611	5.14801	5.63881	5.04198	5.68062	4.19683	3.33584	5.26421	5.26126	5.07622	5.83041	4.93566	3.48357	5.17536
YDR031W	0.63681	0.06679	0.20513	0.56726	0.29761	0.32261	0.98967	0.68783	0.63446	0.77799	1.04336	0.503	0.52712	0.35049	0.53345	0.44658	0.33145	0.92437	-0.07144	0.25466	0.89125	0.43856	-0.11017	0.13807	0.48801	0.3353	0.91177	1.04878	0.49343	-0.00124	0.97104	0.20242	-0.36718	-0.90217	0.23985	0.101	0.54686	0.48817	-0.32705	0.09972	0.87371	0.01225	0.03507	-1.02075	0.99874	0.30613	0.31698	1.27145	0.7657
YOR333C	-4.9795	-4.75505	-4.77237	-4.90979	-4.75208	-4.58714	-4.58768	-4.75545	-4.66208	-4.78953	-4.9942	-4.9684	-4.62412	-5.03027	-4.55421	-4.54139	-4.75939	-4.65546	-4.23067	-3.87201	-3.94597	-3.8919	-4.17638	-3.90597	-3.72668	-3.92785	-4.43287	-3.93541	-3.94176	-3.85001	-3.88087	-4.03944	-4.00946	-4.14694	-3.91649	-4.03901	-3.98086	-4.04447	-4.16108	-3.9558	-3.51447	-4.18844	-3.79627	-4.15794	-3.93096	-3.78929	-4.15083	-4.46559	-3.76407
YDL190C	1.62641	1.51915	1.58065	1.44395	1.53679	1.51666	1.51987	1.44679	1.46797	1.5221	1.52553	1.37422	1.77675	1.69778	1.77191	1.53747	2.02182	1.85267	1.37406	1.32918	1.57702	1.65748	1.33955	1.14506	1.7335	1.13744	1.47414	1.33846	1.18281	1.26197	1.48691	0.72243	1.23738	0.5874	1.29501	1.28555	1.69002	1.52264	1.51784	1.20293	1.5897	1.63159	1.6352	1.23515	1.64114	1.43991	1.61931	1.6932	1.25858
YKR083C	-1.50617	-1.42053	-0.94659	-0.78848	-1.04197	-0.81453	-1.22166	-1.25271	-1.70823	-1.32482	-1.41377	-1.59239	-1.20054	-1.52062	-1.42524	-1.34852	-1.74687	-0.98356	-1.58507	-1.26235	-1.00757	-1.78915	-2.52695	-0.86571	-1.20309	-1.17121	-0.42427	-0.80419	-1.15425	-1.15754	-0.30775	-0.39556	-0.83478	-0.99178	-0.82052	-1.0552	-1.69133	-0.7133	-2.23779	-1.03129	-1.13563	-2.54446	-0.7799	-1.95463	-0.96104	-0.78473	-1.60282	-1.72747	-1.06853
YBR141C	-3.19371	-2.96753	-2.87865	-2.75159	-2.77088	-2.96034	-2.7806	-2.91307	-2.93688	-2.99639	-2.98392	-2.7042	-2.88581	-3.05488	-2.878	-2.83654	-3.11243	-3.47154	-2.9706	-2.57557	-2.71273	-3.03015	-2.6946	-1.88971	-2.80229	-2.77704	-2.53368	-2.91467	-2.64315	-2.18312	-2.75935	-1.95433	-3.25066	-2.50287	-2.58205	-2.23482	-2.46194	-2.52748	-2.50568	-2.06303	-2.45012	-2.28921	-2.42307	-3.15561	-2.52831	-2.25609	-2.83424	-2.75026	-2.39526
YDR453C	-0.18669	-0.02519	-0.34799	-0.05308	0.2856	0.20284	0.89523	1.08521	0.03756	0.75587	0.64969	0.79784	1.6479	1.89833	1.57599	0.77823	1.93274	1.597	0.90461	0.07901	2.12314	2.21904	2.12876	1.50884	1.98051	2.17803	1.35509	0.57961	-1.20666	0.00868	2.01542	1.17411	0.71154	-0.01181	-0.08705	-0.55016	0.6546	0.13714	0.76433	1.01446	1.2101	1.97717	-0.30056	-0.34398	0.13511	-0.88098	1.89475	6.27422	0.39529
YAL008W	1.09532	1.24054	1.28039	1.45097	1.70788	1.54341	1.11844	1.12223	0.71541	0.88343	1.13014	1.13132	0.16396	0.60488	0.61523	0.30465	0.52278	0.29817	1.33552	0.80039	1.95136	1.70579	1.38014	1.30404	1.58815	1.53353	1.77884	1.58676	0.93026	0.80774	1.27102	1.24125	1.42638	0.79278	0.86316	0.60186	1.67568	1.19795	1.13908	1.12354	1.1932	0.92055	1.13717	0.48621	1.66367	0.86168	1.98763	1.84174	1.90082
YDR490C	0.51236	0.30869	0.3421	0.34169	0.79251	0.48645	0.76245	1.07278	0.7478	0.80092	0.67604	0.91823	0.67934	0.79421	0.90572	0.75663	0.83551	0.91594	0.54141	0.38566	1.07384	0.81101	0.70204	0.36676	0.49578	0.79956	0.89017	0.50231	0.38314	0.06637	0.32519	0.65057	1.17124	1.15224	0.62361	0.54016	0.75786	0.73192	0.59359	0.34428	0.59165	0.67595	0.53462	0.83326	0.76621	0.38192	0.79665	0.9038	0.9605
YDR191W	-1.72438	-1.28802	-1.55667	-1.50368	-1.41713	-1.29602	-1.68617	-1.78616	-1.71813	-1.63136	-1.8778	-1.46497	-1.50545	-1.17233	-1.30425	-0.74486	-1.46739	-0.99297	-1.36274	-1.41092	-1.68097	-1.58618	-1.17791	-1.28382	-1.5911	-1.56168	-1.57354	-1.08574	-1.72547	-1.34941	-1.77646	-0.76661	-1.17065	-0.52376	-1.56026	-1.2918	-1.61513	-1.71993	-1.68996	-1.57693	-1.63922	-1.56148	-1.39726	-0.947	-1.53347	-1.37345	-1.54806	-1.22235	-1.39539
YER107W-A	-4.93115	-4.60249	-4.4964	-4.49716	-4.48086	-4.35871	-4.34014	-4.61577	-4.55339	-4.2444	-4.55979	-4.16675	-4.85069	-2.81364	-4.34662	-3.94741	-4.53099	-5.35836	-3.98618	-4.04324	-4.24636	-3.59717	-3.573	-3.58187	-3.54628	-3.70486	-3.74838	-4.17661	-3.67028	-3.4101	-4.17694	-3.99539	-4.14818	-3.81701	-3.69075	-3.72273	-3.93147	-3.71607	-3.83343	-3.74236	-3.92178	-3.69412	-3.51294	-4.12572	-2.94989	-3.92019	-2.98758	-3.59216	-4.20522
YLR459W	1.38992	1.47426	1.11747	1.18354	1.23868	1.074	1.03433	0.9841	1.06448	0.99804	0.96436	0.24811	1.39507	1.37604	1.17687	1.07895	1.32286	1.37973	1.1589	0.86576	0.85828	1.14237	1.6779	1.11005	1.52537	1.64986	1.24132	1.9274	0.56837	1.32632	1.64331	0.63399	0.52181	0.17211	1.01238	0.89945	1.16133	1.2016	1.20835	0.91953	1.22261	1.74343	1.35492	1.34219	0.79421	1.21317	1.11175	1.07912	0.9629
YNL193W	0.01234	-0.1205	0.07643	0.35031	-0.07703	-0.00789	-0.14733	0.14458	-0.09379	-0.21135	-0.34356	0	-1.08506	-0.65116	-0.65449	-0.64243	-1.02991	-0.86132	0.22624	-0.00051	-0.06521	-0.35016	-0.29368	-0.86012	-0.09154	0.2526	0.46056	0.24041	0.43526	-0.06285	-0.16682	0.07469	-0.0618	-0.16841	0.37857	-0.00234	0.27052	0.23189	-0.26209	-0.51435	0.04967	-0.21366	-0.11908	-0.48556	0.52363	0.18303	-0.29376	0.21626	0.3678
YHR099W	0.31243	0.31674	0.47518	0.4486	0.48147	0.4658	0.43083	0.42905	0.52396	0.33022	0.30235	0.41377	0.52858	0.68141	0.76479	0.7548	0.75992	0.65438	0.63027	0.72212	0.6873	0.56434	0.33902	0.90817	0.66936	0.39368	0.49249	0.31691	0.67037	0.72706	0.18581	0.3292	0.25579	0.42187	0.57961	0.70544	0.81509	0.60398	0.65596	0.77898	0.81343	0.80748	0.4805	0.30941	0.4683	0.78536	0.31208	0.51237	0.46851
YLR360W	-0.80573	-0.80941	-0.44586	-0.68369	-0.75548	-0.39407	-0.54548	-0.35339	-0.63684	-0.35673	-0.52002	-1.00376	-0.61137	-0.55627	-0.67271	-0.51903	-0.49243	-0.45977	-0.21785	0.07627	-0.50316	-0.4531	-1.0142	-0.36815	-0.73476	-0.92427	-1.04231	-0.68306	-0.64633	-0.89774	-0.59734	-1.24786	-0.89231	-1.72523	-0.72563	-0.64835	-0.77066	-0.59154	-0.87917	-0.49412	-0.47307	-0.77322	-0.84197	-0.90977	-0.5005	-0.84812	-0.74505	-0.17505	-0.45497
YKL070W	-4.4309	-4.37656	-4.40446	-4.54582	-4.4455	-4.26746	-4.5056	-4.50975	-4.94296	-4.47576	-4.5074	-4.45705	-4.51148	-4.39432	-4.34662	-4.54964	-4.67446	-4.57911	-3.84048	-3.57551	-3.43582	-2.69383	-4.15887	-3.81371	-3.8561	-3.58383	-3.66423	-3.53811	-3.67028	-3.61755	-3.71514	-3.89987	-4.06163	-3.97354	-3.8786	-3.9369	-4.06027	-3.88049	-3.7085	-3.8954	-3.79168	-3.61421	-4.12561	-3.84764	-4.01631	-3.75277	-3.71536	-3.05268	-3.75125
YPR170W-B	2.75567	2.48825	2.72939	2.27396	2.66306	2.86037	3.15457	3.00864	3.1478	2.81095	3.19906	3.05068	3.52245	3.47567	3.14437	3.12957	3.5854	3.09618	3.47468	2.72164	3.03571	3.0347	3.62753	3.21508	3.12749	3.25805	3.04545	3.04143	2.7268	2.84931	3.77679	2.00596	2.89848	1.84109	2.92186	2.68096	3.18477	3.50999	3.2194	3.02687	3.12876	3.62514	3.28698	3.00622	2.83709	2.98308	3.29532	2.82736	3.35676
YKL145W-A	2.3113	2.46471	2.09924	1.46562	2.3097	2.08993	1.82037	1.91429	2.12203	1.99879	2.00168	2.0034	1.74046	1.73834	1.67626	1.39074	1.72749	1.9825	1.30814	2.16397	1.68312	1.51855	1.03598	2.05377	2.16854	1.95768	1.44878	1.41842	1.81009	1.86912	1.57862	1.36855	1.88887	0.96631	2.00037	2.19055	1.45209	2.46694	1.60884	2.31106	2.19385	1.90661	1.61748	1.74025	2.11736	2.05497	2.58554	1.56653	1.75511
YOR142W	3.33838	3.26152	3.22993	3.24681	3.37985	3.28445	3.67145	3.72907	3.62782	3.87117	3.94933	3.55928	4.18276	4.13437	4.07442	3.7751	4.44709	4.06473	3.43421	3.27128	3.53884	3.8918	3.73665	3.46987	3.87692	3.47245	3.93124	3.86037	3.13209	3.3197	3.83994	3.33889	3.30064	3.15292	3.17175	3.4511	3.71058	3.60085	3.62392	3.44912	3.69898	3.9412	3.35558	3.29292	3.5372	2.9959	3.73707	3.77346	3.58282
YLR430W	-0.23659	-0.24082	-0.24937	-0.26468	0.03385	-0.16958	-0.00657	-0.01354	0.08331	-0.04272	-0.03772	0.00782	0.06517	0.18239	0.11267	0.1435	0.14764	0.13947	-0.26613	-0.50924	-0.23962	0.0102	-0.03559	-0.12665	0.0717	-0.29471	-0.4096	-0.50461	-0.61567	-0.28856	-0.50455	-0.33892	-0.24731	0.03373	-0.32498	-0.20612	0.1526	-0.16751	0.24638	0.10048	-0.16478	0.07289	-0.21569	0.07713	-0.5218	-0.32318	-0.41663	-0.54447	-0.37673
YDR304C	3.00444	3.06022	3.14816	2.97623	2.94095	3.04638	2.85214	3.08299	3.03798	2.85316	3.00855	2.91878	3.36988	3.46481	3.33667	3.34302	3.32631	3.74897	3.28818	2.94821	3.54734	3.50579	3.39299	2.9022	3.48464	3.23175	3.38909	3.48061	3.20922	3.10029	3.11244	2.71045	3.24084	2.8849	2.94112	2.95647	3.50924	3.19387	3.26967	3.11945	3.32531	3.10514	3.12231	3.04588	3.12941	3.00827	3.69722	3.58464	3.17949
YPL020C	0.06383	-0.16745	0.23208	-0.02187	-0.49922	-0.05474	-0.60734	-0.5452	-0.4269	-0.37052	-0.61164	-0.44078	-0.26385	-0.74433	-0.61459	-0.97858	-0.99712	-0.84084	-0.96506	0.3315	-0.6918	-0.38632	-0.68663	-0.34637	-0.46845	-0.17923	-0.70422	-0.33472	0.34294	-0.09468	-0.17984	-0.34432	-0.87835	-0.00103	-0.42405	-0.10719	-0.71704	-0.22568	-0.16235	0.07999	-0.08557	-0.74649	-0.20478	-0.52849	-0.24933	0.0762	-0.68766	-0.48304	-0.34211
YHL023C	-0.10225	-0.18943	-0.05419	-0.44472	-0.20011	0.09653	-0.35209	-0.43779	-0.48033	-0.48878	-0.48873	-0.49623	-0.13682	-0.13746	-0.15641	-0.20539	-0.28839	-0.18744	-0.43597	-0.37269	-0.1804	-0.43293	-0.36043	0.13345	-0.48018	-0.4732	-0.58379	-0.72907	-0.31899	-0.29565	-0.54571	-0.40348	-0.1945	-0.37146	-0.2909	-0.116	-0.14652	-0.19685	-0.22775	0.16424	-0.36698	-0.40197	-0.4148	-0.45361	-0.32716	-0.17099	-0.51897	-0.4324	-0.18291
YLR165C	-0.8394	-0.48476	-0.2765	-0.53603	-0.8658	-0.76205	-1.78045	-1.46772	-1.76284	-1.59999	-1.70949	-1.86724	-1.2713	-1.39162	-1.57064	-1.19187	-1.96757	-1.13729	-0.64518	-0.25811	-1.24852	-1.25862	-1.24969	-0.82378	-0.49195	-0.25518	-1.46471	-1.03737	-0.70776	-1.00252	-0.57738	-0.36615	-0.89231	-1.36715	-1.55292	-1.59183	-1.32313	-1.34235	-1.60148	-1.18589	-0.4678	-1.4847	-1.64676	-1.37254	-0.01839	-0.64296	-0.76501	-0.39659	-0.8302
YOR283W	-0.18867	-0.22643	-0.28313	-0.04762	-0.02118	-0.20986	-0.77741	-0.8038	-0.84376	-0.80946	-0.8807	-0.56787	-0.68564	-0.40646	-0.56444	-0.57765	-0.34044	-0.21148	-0.23631	-0.40618	-0.53387	-0.94114	-0.89674	0.0744	-0.34896	-0.72218	-0.42765	-0.6199	0.00625	-0.52066	-0.534	-0.52472	-0.03778	-0.55178	-0.07798	-0.32184	-0.26862	-0.0154	-0.55949	-0.09591	-0.62878	-0.63468	-0.53795	-0.60122	-0.28973	-0.56953	-0.44822	-0.64603	-0.11394
YMR052C-A	-3.18567	-2.13859	-2.67231	-2.87793	-2.13737	-2.80933	-2.01849	-2.0894	-2.14085	-1.81388	-2.06489	-2.1696	-2.66825	-2.37836	-2.25959	-1.69301	-2.09216	-1.61955	-2.22034	-2.23428	-2.20736	-2.01325	-2.32652	-2.67879	-2.2192	-1.76595	-2.40816	-2.23156	-2.9804	-2.48891	-1.81147	-1.41966	-1.77473	-2.44627	-2.09904	-1.87273	-2.02052	-1.60493	-2.10393	-2.41412	-1.76102	-1.99999	-1.987	-1.99959	-2.29678	-2.37789	-2.34456	-1.92878	-2.22685
YOR053W	-3.51506	-3.4363	-3.35845	-2.82938	-2.40931	-3.49108	-2.91627	-3.02167	-2.68783	-3.39006	-3.46095	-2.67803	-3.47041	-2.98779	-3.33693	-2.60549	-3.15472	-3.70351	-2.86908	-3.30482	-2.82814	-2.67847	-2.9092	-2.22622	-2.92173	-1.75144	-1.87407	-2.92632	-2.38016	-2.70831	-2.63382	-2.60748	-2.75606	-2.3305	-2.1338	-1.78417	-2.79818	-2.88649	-2.80922	-3.30438	-2.86526	-2.97541	-2.51337	-2.9453	-3.12541	-3.10423	-3.14803	-3.05268	-2.98651
YJR054W	-0.87355	-0.48305	-0.75559	-0.29026	-0.7427	-0.69897	-0.82543	-1.01819	-0.96101	-0.86557	-0.95525	-0.84374	-0.60167	-0.60197	-0.59882	-0.43632	-0.53722	-0.34411	-0.63469	-0.28687	-1.17524	-0.98907	-0.87477	-0.63661	-0.99054	-0.83778	-1.21645	-0.66708	-0.56825	-0.66016	-1.0937	-1.038	-1.12052	-0.99815	-0.44044	-0.53876	-0.9939	-0.87885	-0.61752	-0.52754	-1.07591	-1.17909	-0.91698	-0.59834	-0.97859	-0.5403	-1.24865	-0.91593	-0.92091
YER084W-A	-4.6368	-4.903	-4.51801	-4.92084	-4.69029	-4.71173	-4.9234	-4.86331	-4.4264	-4.65695	-4.8732	-4.45397	-4.50449	-4.46958	-4.42143	-4.52513	-4.78697	-3.1932	-4.13517	-4.13972	-4.03467	-4.32431	-3.87886	-3.99382	-3.82562	-3.94375	-3.76642	-4.05204	-3.88494	-4.01487	-4.2787	-4.64631	-4.36548	-3.61466	-4.24652	-4.00872	-4.29004	-4.20493	-4.00999	-3.92793	-4.25172	-3.89305	-4.2117	-4.06593	-4.06539	-3.97319	-3.42967	-3.98967	-4.35001
YHL005C	-3.41674	-3.87651	-3.94501	-4.55585	-4.25723	-4.58673	-4.19227	-3.98248	-4.52661	-4.29277	-4.65013	-5.0806	-4.36675	-4.02709	-4.26646	-4.58181	-4.59504	-4.52085	-3.11997	-3.36797	-3.43582	-3.43177	-3.96553	-3.81371	-3.8561	-3.53707	-3.74838	-3.26169	-3.56105	-3.61755	-3.52611	-3.89008	-4.06163	-4.1982	-3.46588	-3.52453	-4.1767	-3.81119	-4.09222	-4.08051	-3.79168	-3.73721	-3.35866	-3.68741	-3.39798	-4.02218	-3.53705	-3.68111	-3.86283
YMR255W	0.09046	-1.0064	-0.04922	-0.11556	-0.48346	-0.35282	-0.12943	-0.21393	0.04696	-0.12862	-0.34375	-0.3769	0.21982	-0.45386	-0.16375	-0.85124	-0.45734	-0.22551	0.06289	0.98581	0.50462	0.1049	-0.40017	0.80027	-0.32109	0.0542	0.26222	0.09526	0.61291	-0.01198	0.41042	-0.63734	0.03524	-0.19152	0.23146	0.60935	0.00957	0.59547	-0.25732	0.50111	0.13186	-0.44951	0.09015	-0.53577	0.65152	0.5307	-0.14778	-0.19542	0.34563
YDR029W	-4.81471	-4.75746	-4.8232	-4.70064	-5.01546	-5.03133	-4.85944	-4.88285	-5.06663	-5.29607	-5.08951	-4.962	-5.0328	-4.97172	-5.0197	-5.13422	-5.08659	-4.75993	-4.48587	-4.48342	-4.04211	-4.32554	-4.36184	-4.2688	-4.13921	-4.15142	-4.30367	-4.19957	-3.79831	-4.25195	-4.10502	-4.47143	-4.60499	-3.77896	-4.28224	-3.9695	-4.2865	-4.36794	-4.09233	-4.18675	-4.17792	-4.30226	-4.28357	-4.06225	-4.37515	-4.17852	-4.46323	-4.15137	-4.09703
YPL154C	4.07323	4.15999	3.88632	4.25461	4.21979	4.28195	5.06007	5.37832	4.93834	5.20394	5.15832	5.22581	5.04901	5.43084	5.1541	4.99503	5.34253	5.16447	4.30285	4.35419	4.67148	5.0061	4.9016	4.06753	5.06678	4.87484	5.03676	5.44379	4.05538	5.95808	5.18789	4.85165	4.0121	3.96534	4.13015	4.38657	4.90664	4.67584	4.68175	4.18649	4.94354	5.79312	4.75963	4.92254	4.62178	5.96401	5.29157	5.81761	4.65704
YDR033W	4.04289	4.16599	3.85703	4.08936	3.92773	4.07546	1.58962	1.67094	2.00351	1.20275	1.43399	1.58272	3.30948	3.13055	2.99015	3.54313	3.57957	3.18816	3.86675	3.9802	1.82917	2.35197	3.74365	3.46471	4.62117	4.77751	2.36406	3.68049	4.06356	2.67342	3.1007	3.57949	4.11382	4.06282	3.72596	3.73343	3.06794	2.91408	3.55679	3.56238	1.5982	2.24514	4.3272	4.66797	4.19526	2.59607	3.02839	2.97577	3.93357
YNL043C	-2.44464	-2.18473	-2.70151	-2.25708	-2.13737	-2.47068	-3.21851	-2.61049	-3.21062	-3.16847	-3.19973	-2.91682	-2.95079	-3.13916	-3.60652	-3.34575	-3.21089	-4.03813	-1.81856	-2.31673	-2.3625	-2.25282	-2.75813	-2.94146	-2.77118	-2.79461	-2.34826	-2.76334	-2.42416	-2.71505	-2.08268	-0.71337	-1.89358	-2.39195	-1.03261	-1.72107	-2.63935	-2.31685	-2.44798	-2.40047	-2.47814	-3.40452	-3.33128	-2.58152	-2.1777	-2.91104	-3.0981	-2.4948	-2.4097
YDR253C	-3.60972	-3.22003	-3.31125	-3.57992	-3.33322	-3.24164	-2.83668	-2.7343	-3.05999	-2.78042	-2.81772	-2.85812	-2.61144	-3.39707	-3.43856	-3.17352	-3.63094	-3.50092	-2.92153	-2.39903	-2.98935	-2.5429	-3.05008	-1.8958	-2.63299	-2.82852	-2.43499	-2.58651	-3.01867	-2.44978	-1.84867	-1.88779	-2.54581	-1.83936	-2.9599	-2.43344	-2.89528	-2.19365	-2.87988	-2.09688	-2.44643	-2.81085	-2.66428	-2.83604	-2.46013	-2.13376	-2.35816	-2.85052	-2.75127
YNL014W	-2.99015	-2.62518	-2.67771	-2.5612	-2.57416	-2.62081	-3.28056	-3.01162	-3.64578	-3.07124	-3.26632	-2.98746	-3.78493	-3.40606	-3.57864	-3.38506	-3.56955	-3.66064	-2.18951	-2.06108	-2.56323	-2.50567	-2.50118	-2.46777	-2.58211	-2.37292	-2.58001	-2.77103	-2.58634	-2.7395	-2.85984	-2.88379	-2.67066	-3.02279	-2.732	-2.69152	-3.04784	-2.74521	-2.71811	-2.54241	-2.77058	-2.71034	-2.71795	-2.56708	-3.10366	-2.65901	-2.82121	-2.0183	-2.6656
YNL241C	3.30556	3.27587	3.06834	3.19186	3.29138	3.24551	4.14093	4.23675	3.79499	4.15897	4.37611	4.1663	4.08557	4.11035	3.55324	3.41466	4.05201	4.22794	3.43064	3.04187	4.01178	3.99332	4.01966	3.45035	4.1379	3.83785	3.44983	3.69462	2.66082	3.6552	4.25538	3.97033	4.00713	3.82966	3.16995	3.43083	3.96692	3.55111	4.20257	3.70409	4.07567	4.93335	4.06561	4.42313	3.09313	3.73319	4.106	4.32196	3.55053
YAL032C	-0.53098	-0.44769	-0.30578	-0.54922	-0.51125	-0.66378	-0.3699	-0.44905	-0.49817	-0.32434	-0.29867	-0.26945	-0.53108	-0.63637	-0.6413	-0.3871	-0.8598	-0.37848	-0.76602	-0.74924	-0.24263	-0.25359	-0.37581	-0.42039	-0.41658	-0.35465	-0.14643	-0.46307	-0.41589	-0.27221	-0.44909	-0.06942	-0.26836	-0.06144	-0.39261	-0.43024	-0.47846	-0.07905	-0.51057	-0.65229	-0.50273	-0.63716	-0.33276	0.084	-0.73238	-0.4477	-0.65341	-0.84154	-0.49925
YEL011W	2.53509	2.68419	2.2953	2.61719	2.57472	2.6716	3.41721	3.59666	3.42995	3.63633	3.48483	3.6899	3.09257	3.19293	3.06012	3.4501	3.68773	3.45161	3.32952	3.39605	4.00629	4.03451	3.65648	2.40734	4.18061	3.92989	3.94245	4.03482	2.8954	2.71956	3.83025	3.61584	3.30741	3.10538	2.494	2.60572	4.03486	4.25569	3.36691	2.54719	3.85267	4.62513	3.31588	3.22255	3.43597	2.87294	3.62389	4.29092	3.14537
YNL291C	0.41591	0.44883	-0.0207	0.21835	0.49909	0.34397	0.28445	0.2071	0.09854	0.45159	0.27421	0.32794	0.58502	0.53874	0.40831	0.29248	0.48532	0.38106	0.35691	0.07292	0.06706	0.22761	0.39624	0.42113	0.45044	0.0852	0.20533	0.36049	-0.35962	0.35779	0.67501	0.31074	0.37513	-1.03493	0.09234	0.20394	0.38862	-0.10656	0.55855	0.33693	0.09861	0.40585	-0.02145	0.27067	0.18165	0.26622	0.42284	0.05291	-0.20561
YMR104C	1.07366	1.18521	0.75212	1.11529	0.96665	1.24567	1.53974	1.49963	1.47896	1.6091	1.52147	1.43218	0.02989	0.12703	0.20528	0.32242	0.21182	0.34532	0.67576	0.63573	1.2041	1.36831	1.03626	0.33873	1.19557	0.9631	1.4487	1.5238	0.12362	0.87917	1.34944	1.16043	0.71539	0.61567	1.27119	1.27153	1.24745	0.88131	1.0242	0.37063	1.24673	1.31966	1.32159	1.28757	1.2172	1.06999	1.06783	1.54159	1.47792
YDL140C	2.56968	2.4231	2.38806	2.59248	2.64214	2.69046	2.84787	2.74094	2.81779	2.77229	2.76587	2.77193	3.10456	3.17019	3.06775	3.12834	3.45718	3.23836	2.5892	2.5583	2.79688	2.72719	2.64212	2.79731	3.29565	2.48336	2.99172	2.5929	2.3189	2.92922	2.73706	2.71202	2.59596	2.43523	2.5672	2.6284	3.08658	2.89313	2.83138	2.86801	3.105	3.33793	2.84237	2.76349	2.84729	2.85551	3.09025	3.00111	2.83025
YLR079W	1.02403	0.66032	0.8517	0.75866	0.93111	0.76509	0.24365	0.15618	0.30136	0.36903	0.45586	0.07795	0.79733	0.1961	0.17409	-0.35896	0.17563	0.22683	0.951	0.99783	1.09019	0.90142	0.48638	1.28554	0.50902	0.56108	0.83529	0.68808	1.21255	0.30043	0.46978	0.06552	1.14186	0.28759	1.0415	1.0019	0.71598	1.06388	0.54596	0.8769	0.8819	1.00802	1.00954	0.27348	0.79445	0.84142	1.23759	1.21599	1.32631
YOR348C	-3.11387	-2.67701	-3.48972	-3.28014	-3.48908	-3.15445	0.23349	0.30096	-0.64087	0.38619	0.24615	0.38473	-1.60751	-1.67924	-1.44061	-1.23283	-1.73154	-1.04021	-2.56005	-2.734	0.4781	0.29138	-0.60934	-2.78167	-2.03772	-1.77445	1.55947	1.01189	-1.96374	-1.81309	-2.10651	-2.0227	-1.60912	-1.62244	-3.14891	-3.03279	-1.11439	-1.78405	-1.3861	-2.57819	-1.44229	-0.99765	-1.47222	-0.66194	-0.78245	-2.26503	-1.61312	-1.69004	-1.20171
YOR097C	0.90051	0.67528	0.9538	0.6405	0.56154	0.979	0.64643	0.73472	0.73096	0.81054	0.85624	0.39154	0.85617	0.70011	0.77641	0.7057	0.44743	0.79829	0.27991	0.54638	0.9803	0.83663	0.25727	0.27517	0.77011	0.58344	0.65773	0.97358	0.18989	0.56267	0.5777	-0.09097	0.24454	-0.1272	0.35486	0.28477	0.29196	0.27982	0.42562	0.44541	0.56645	0.26897	0.0151	0.06365	0.77143	0.31103	0.70708	0.88296	1.07675
Q0143	-2.11267	-4.93609	-4.63221	-4.18728	-4.6442	-4.00714	-3.66116	-4.91198	-5.04054	-3.42115	-2.60915	-4.31481	-2.05415	-2.41117	-1.8552	-4.96186	-1.82684	-3.01198	-4.80359	-4.27022	-4.15274	-4.67786	-4.92939	-4.08897	-3.39409	-4.70087	-4.9317	-4.11148	-4.1905	-3.96417	-4.16092	-4.5778	-4.14818	-3.87953	-4.19256	-4.53351	-4.343	-5.05014	-4.04562	-3.8954	-3.92178	-3.82424	-3.79652	-3.98289	-2.82539	-3.37574	-2.49503	-4.27639	-4.15608
YOR072W-B	4.46128	3.99339	4.85384	4.97642	5.79174	3.61704	4.1059	6.19483	5.97592	4.00195	4.70811	5.98582	4.96732	5.71115	5.6359	4.8601	5.3573	3.8206	4.7829	3.86601	4.57168	3.93319	5.61229	3.98237	1.91866	4.75882	6.59393	6.02894	3.30676	4.8615	6.06949	6.31289	5.2968	5.37497	5.73786	5.27975	5.32684	4.82393	4.7554	4.3591	4.89152	5.57626	5.45554	4.61628	4.52573	5.65171	4.48398	4.53556	4.33714
YHR103W	0.35933	0.39793	0.57616	0.51341	0.68143	0.50872	0.65371	0.77971	0.79738	0.62911	0.61454	0.52691	0.13845	0.38125	0.56449	0.51954	0.56303	0.5183	0.50586	1.14509	0.91229	0.4938	0.14459	0.69659	0.5609	0.49983	0.3406	0.31226	0.49239	0.27986	0.40076	0.28021	0.74996	0.39775	0.64385	0.63115	0.44511	0.86639	0.35565	0.84974	0.52173	0.3811	0.23688	0.30697	0.74017	0.60236	0.83152	0.62881	0.68373
YOL107W	0.54467	0.15389	0.49348	0.8153	0.26161	0.70926	0.58739	0.45049	0.40038	0.55595	0.56433	-0.03421	1.13967	1.14404	0.95092	1.27267	1.2023	1.19541	-0.00808	-0.06289	0.20056	0.54495	0.75416	-0.36326	0.50763	0.31614	1.02001	1.34488	0.26258	0.38243	0.49515	-0.37462	-0.38132	-0.55099	0.20779	-0.06619	0.4717	-0.23782	0.59287	-0.21864	0.49949	0.59269	0.58971	0.50556	-0.25924	0.44075	0.27414	0.73097	0.3786
YOL126C	0.37574	0.45217	0.44929	0.77726	0.62262	0.17101	0.71287	0.44996	0.35359	0.47938	0.49166	0.54597	0.24509	0.02054	-0.04481	0.23118	0.07413	0.01351	0.44167	0.03931	0.40276	0.7848	1.69568	0.56074	1.91462	1.74557	1.59711	1.65918	-0.41283	0.03242	1.44768	1.41403	0.68711	1.08108	0.57027	0.28024	1.35766	0.87165	1.77383	1.20025	1.09794	1.26887	0.41314	0.6668	0.66217	-0.46068	1.25194	1.10016	-0.29794
YHR026W	2.82538	2.87039	2.6512	2.82433	2.87025	2.92683	3.49878	3.11501	3.22659	3.30093	3.41477	3.14181	4.05276	3.95965	3.87289	4.05876	4.02062	4.04279	2.71234	2.84558	2.87646	3.37231	3.66436	3.37112	3.84855	3.71986	3.27377	3.63985	2.88746	3.29631	3.67637	3.45347	2.77495	3.19207	2.57487	2.83034	3.42266	3.05023	3.64267	3.14424	3.52831	3.76696	3.03028	3.60234	3.52364	3.12523	3.71103	3.50073	2.72419
YGR028W	1.11496	1.14159	0.96539	1.20329	0.96255	1.04497	1.08422	1.38225	1.21382	1.03461	1.01864	0.93394	1.42906	1.3509	1.58688	1.30834	1.7043	1.57139	1.06621	1.16236	1.32799	1.08286	0.61332	0.79786	0.54389	0.83882	1.12466	1.45173	1.41469	0.91171	0.85435	0.48655	0.57219	-0.35416	1.33437	1.00056	0.95292	0.88079	0.50456	0.84616	0.92436	0.60501	0.70165	0.47997	0.70877	1.18303	0.9787	1.41442	1.09811
YGL061C	-1.55519	-1.4889	-1.61331	-1.6478	-1.85119	-1.75278	-1.58858	-1.95738	-1.76284	-1.79062	-1.72586	-1.72464	-1.12125	-1.74139	-1.54429	-1.91669	-1.88819	-1.0623	-1.98688	-1.40911	-1.51257	-1.54833	-2.04082	-1.13608	-1.65719	-1.63602	-1.37956	-1.35886	-0.96362	-1.41372	-1.92088	-1.97286	-1.62874	-1.8464	-1.58902	-1.18881	-1.69133	-1.084	-1.94253	-1.3193	-1.37588	-1.96868	-1.45056	-1.5485	-1.59305	-1.2504	-1.67418	-2.21539	-1.35182
YMR141W-A	-5.22255	-4.30811	-5.34905	-4.50829	-4.90559	-4.52499	-5.01266	-5.49301	-5.1547	-4.93414	-5.12465	-5.9744	-5.49539	-4.67367	-4.75159	-4.8523	0.03419	-4.70845	-4.66756	-4.49949	-4.11759	-3.75848	-4.12407	-4.66662	-4.62459	-4.43564	-3.71471	-3.09576	-4.45722	-4.79255	-4.19486	-3.98677	-4.09664	-4.16699	-4.39462	-4.87776	-4.81721	-4.78838	-4.87492	-4.76791	-3.54045	-5.28736	-4.76387	-4.53344	-4.41905	-3.91061	-2.85565	-4.08233	-4.07695
YJL089W	-2.86056	-2.53296	-2.67754	-2.56276	-2.72518	-2.42136	-1.58305	-1.66036	-2.23852	-1.52131	-1.80988	-1.76025	-1.77525	-1.61722	-1.88665	-2.20014	-2.07133	-1.97082	-1.85986	-1.92336	-1.92203	-1.77137	-1.8082	-2.33331	-2.24332	-2.56984	-1.95843	-2.1083	-2.49319	-2.52442	-1.17069	-1.87089	-2.08289	-2.00162	-2.38851	-1.69044	-1.95017	-2.0857	-1.30773	-1.76871	-1.86533	-1.84532	-2.78714	-2.47455	-1.91306	-2.57463	-2.51502	-1.496	-2.11155
YKL116C	-0.22776	-0.37166	-0.28038	-0.02598	-0.27029	-0.07815	-0.04849	-0.00358	-0.30851	0.00911	-0.09056	-0.03076	0.26478	0.53278	0.26257	0.46514	0.50434	0.57088	0.36444	0.00283	0.00123	0.14059	0.08217	-0.07953	0.06379	-0.02049	0.07754	-0.28403	0.2936	-0.35146	-0.06815	-0.06283	0.08365	-0.20277	-0.06266	0.04024	0.27224	0.1059	0.29106	-0.05036	-0.03015	-0.03002	-0.04642	-0.02234	-0.33357	-0.22345	-0.07928	-0.3064	-0.2486
YHR134W	-0.21184	-0.28253	-0.48489	-0.60367	-0.11364	-0.64165	-0.98145	-0.63988	-0.9316	-0.76104	-0.77291	-0.95876	-0.55072	-0.64195	-0.77075	-1.03355	-0.72509	-1.02148	-0.73954	-0.63147	-0.66207	-0.74753	-0.55082	-0.29387	-0.59821	-0.67158	-0.65767	-0.52951	-0.75782	-0.96007	-0.74085	-0.31064	-0.44086	-0.15418	-0.29806	-0.45319	-0.81828	-0.63304	-0.69436	-0.14089	-0.76209	-0.89689	-0.44587	-0.53767	-0.64187	-0.66737	-1.07979	-0.86763	-0.39571
YOR022C	-0.63733	-0.57061	-0.5012	-0.74234	-0.61646	-0.50962	-0.99583	-0.70837	-0.94075	-0.84923	-0.90273	-0.96393	-0.62969	-0.72504	-0.48191	-0.87728	-0.85949	-1.14021	-1.24075	-0.74914	-0.58774	-0.25316	-0.759	-0.78821	-0.79335	-0.45942	-1.16355	-1.02338	-1.28881	-0.9101	-1.06332	-0.71572	-0.81749	-0.56138	-1.2251	-1.01306	-0.89064	-0.87101	-0.7429	-0.97915	-1.12533	-1.34314	-1.28907	-0.66194	-0.71798	-0.83761	-0.91956	-0.07266	-0.52085
YBR228W	-1.62651	-1.23889	-1.3289	-1.27055	-1.34886	-1.33933	-1.60886	-1.56143	-1.80086	-1.36712	-1.68134	-1.5759	-1.3949	-1.53025	-1.52578	-1.47018	-1.42022	-1.94354	-1.55454	-1.28559	-1.38312	-1.36789	-1.45288	-1.36279	-1.41421	-1.57828	-1.68146	-1.64047	-1.60958	-1.80466	-1.73998	-1.23701	-1.17046	-0.47662	-1.74383	-1.58595	-1.67597	-1.45539	-1.71905	-1.52355	-1.20979	-1.55665	-1.46037	-1.06161	-1.41605	-1.66238	-1.15947	-1.43727	-1.36667
YNL320W	0.23593	0.38735	0.28702	0.7568	0.41155	0.24377	0.18306	0.01097	-0.14755	0.11574	0.10177	-0.04023	0.55242	0.52746	0.4211	0.90153	0.42578	0.50771	0.30987	-0.0659	0.16831	0.5036	0.69451	-0.5365	0.35389	0.47854	0.48675	0.71855	0.06371	0.50742	0.49866	0.1811	-0.26724	0.26417	0.38133	0.06699	0.07676	-0.25085	0.46791	-0.37139	-0.02179	0.51914	0.09431	0.04895	0.02366	0.23244	0.33289	0.43699	0.04602
YGR123C	-0.58501	-0.41508	-0.23755	-0.09938	-0.01391	-0.37594	-0.11579	-0.48412	0.00998	-0.21634	-0.23279	0.06783	0.08156	0.32444	0.41505	0.57854	0.41261	0.36613	0.15006	-0.26437	-0.47997	-0.75301	-0.26961	0.22118	-0.53961	-0.80459	-0.16593	-0.5753	-0.22459	0.10902	-0.43229	-0.01119	-0.34863	-0.13017	-0.2114	-0.08583	-0.0991	-0.44987	-0.21247	0.02795	0.10377	0.2117	0.10063	-0.03309	-0.4015	-0.04146	-0.08952	-0.62103	-0.10838
YMR220W	0.70413	0.71343	0.64324	0.5388	0.45227	0.72576	1.08881	0.91375	0.8014	0.72182	1.08247	0.69885	0.82176	1.04007	1.26418	1.45898	1.17257	1.08425	0.6098	0.48283	0.87989	0.78308	0.11237	0.58586	0.35803	0.37647	0.56816	0.76166	1.04688	0.83063	0.17791	-0.02208	0.49552	0.49903	0.39107	0.55755	0.40363	0.3656	0.63355	0.83508	0.42746	0.53729	0.80355	1.03699	0.73644	0.82126	0.45682	0.31244	0.64889
YBR269C	1.90111	2.01726	2.16256	1.90293	2.00081	1.93261	2.14573	2.25562	1.62874	2.00928	2.26085	2.16443	2.08822	2.37291	2.34784	1.91391	1.80607	2.07684	2.12585	0.96087	2.96405	2.69928	2.32282	1.78939	2.30184	2.53685	2.70473	2.51191	1.58522	2.04329	2.29576	2.08307	2.4985	2.15999	1.77959	1.37868	2.82232	2.42302	2.25192	1.94016	2.23008	2.44733	2.15437	2.03534	2.0291	1.64264	2.48812	2.25871	2.43058
YMR188C	-0.18462	0.06163	0.14116	0.23642	0.12217	0.07664	0.72351	0.86991	0.63032	1.04573	1.07963	0.49246	1.14263	0.783	1.07614	0.9773	0.85027	1.38567	-0.53322	0.34896	0.36431	0.02547	-0.41717	0.7301	-0.17125	0.19042	0.50378	0.49798	-0.14223	0.17163	1.06177	0.59157	-0.14906	-0.23009	0.0755	0.27142	-0.41895	0.13353	-0.27442	0.70531	0.55521	-0.52895	-0.25549	-0.56376	0.18985	0.38815	0.22872	-0.29265	0.18261
YLR290C	1.48131	1.13305	1.45945	1.43047	1.33066	1.42271	1.04417	1.00938	0.94135	0.8568	0.91144	0.69082	0.90775	1.05657	1.17531	0.93088	0.75623	0.9984	0.89444	1.04999	1.38954	1.11603	0.96643	1.22942	1.01232	1.46012	1.09977	1.06936	1.08871	0.92406	1.21712	1.177	0.98477	0.4272	1.20139	1.1246	1.33149	1.14637	0.86729	1.09354	1.53269	1.13321	0.77305	0.60109	1.44564	1.18932	1.25769	1.99726	1.23739
YNL258C	0.1074	0.0713	0.41687	0.05413	-0.1046	0.11972	-0.47455	-0.25509	-0.09316	-0.43486	-0.30386	-0.60516	-0.39894	-0.33851	-0.39905	-0.56565	-0.34991	-0.69599	-0.41234	0.39092	-0.23077	-0.37446	-0.79151	-0.44332	-0.54137	-0.34474	-0.62094	-0.27221	0.09006	-0.42456	-0.66601	-0.93287	-0.28139	-1.11398	-0.33017	-0.17872	-0.52069	-0.25221	-0.44054	-0.30552	-0.3261	-0.67193	-0.42907	-0.57934	0.12465	-0.2751	-0.40809	-0.35357	-0.18839
YNL075W	-1.53123	-1.26958	-1.19741	-1.15032	-1.07157	-1.45365	-1.47369	-1.63528	-1.00567	-1.39072	-1.37371	-1.16419	-1.17822	-0.90964	-0.79912	-0.56975	-1.07666	-1.03656	-1.25972	-1.3098	-1.48937	-1.68165	-1.33197	-0.63253	-1.67157	-1.45752	-1.41633	-1.6841	-1.21677	-0.88876	-1.77783	-0.95385	-1.13222	-0.24628	-1.2529	-0.9784	-1.22331	-1.28528	-1.21972	-0.94122	-1.22856	-1.1452	-1.27874	-1.15485	-1.23201	-1.38952	-1.18555	-2.1044	-1.20825
YPR159W	2.26874	2.15363	2.03849	2.26237	2.06278	2.20698	2.43388	2.1233	2.28067	2.3913	2.46661	2.37768	2.86811	2.7457	2.52842	2.58059	2.79909	2.68839	2.27112	2.07904	1.92908	2.22925	3.00765	2.61374	2.83121	2.70266	2.07	2.5901	1.88095	2.46155	2.62423	1.90713	2.07834	1.61515	2.50372	2.63248	2.50669	2.38922	2.8858	2.61502	2.38176	2.7303	2.01001	2.33418	1.99896	2.25026	2.36209	2.29321	1.96302
YMR198W	-1.23329	-1.23669	-1.24648	-1.52541	-1.42313	-1.26622	-1.55399	-1.48147	-1.59111	-1.46329	-1.52782	-1.44747	-1.29905	-1.32742	-1.35311	-1.39418	-1.4708	-1.61258	-1.75966	-1.1139	-1.09445	-0.80863	-1.37939	-0.99096	-1.31087	-1.2543	-1.45134	-1.71463	-1.28591	-1.58615	-1.82128	-1.19699	-1.19665	-1.12716	-1.45778	-1.17008	-1.60229	-0.9717	-0.77673	-0.88848	-1.38769	-1.62885	-1.38188	-0.75223	-1.60608	-1.41206	-1.74458	-1.61906	-1.51113
YHR089C	2.0661	1.91692	2.30926	2.00212	2.62316	1.74571	2.23789	1.6304	2.51653	1.94634	2.26547	2.69862	2.68915	2.87513	3.02406	3.07226	2.75789	2.79627	2.55474	1.7988	1.87977	1.51652	2.37804	3.04483	2.00969	2.18125	2.15058	1.77316	2.3045	2.41712	2.1951	2.71503	2.06783	3.52001	2.51957	2.53343	2.2445	1.8475	2.50861	2.48864	1.92176	2.24921	2.25577	2.73768	2.05574	1.93547	2.58059	1.19833	2.30443
YBR190W	-3.55619	-2.98357	-3.07447	-2.74332	-3.34724	-3.19417	-2.47765	-2.35332	-2.87219	-2.86052	-3.14894	-2.65786	-3.19814	-2.94604	-2.82278	-3.30149	-3.2073	-3.02205	-3.47971	-2.54154	-2.6811	-2.46175	-3.08944	-2.7897	-3.31184	-2.65662	-3.08653	-2.37351	-3.22116	-2.72582	-3.02138	-2.55846	-3.63147	-3.8382	-2.50694	-2.37376	-2.77562	-2.53	-3.34463	-2.35882	-2.69115	-2.59024	-2.89761	-3.65549	-2.33939	-2.74035	-3.5299	-2.80874	-3.03172
YBR194W	-1.71717	-1.48687	-1.11885	-1.25163	-1.62084	-1.15075	-1.20449	-1.42949	-1.35631	-1.25588	-1.42308	-1.23815	-1.81222	-1.56987	-1.8396	-1.55995	-1.8547	-2.58597	-1.02527	-1.23034	-0.76253	-1.11056	-1.49407	-1.46521	-1.10246	-1.10965	-1.07177	-1.05711	-1.59878	-1.48933	-1.20675	-1.08534	-1.30667	-0.9941	-1.36638	-1.65271	-1.0505	-1.47198	-1.61605	-1.11127	-1.52046	-2.10236	-1.561	-1.47911	-1.17526	-1.21133	1.07798	-0.94752	-1.02541
YNR018W	1.8534	1.74188	1.9772	1.82229	1.87891	1.58911	2.13602	2.08448	1.82416	2.03039	2.00939	2.10079	1.97384	2.08389	2.17881	2.16251	1.96933	2.23361	2.57733	2.00737	2.28637	2.10083	2.15705	2.10703	1.46921	1.82885	2.25446	1.90824	2.38858	2.10033	1.67774	2.33109	2.09109	2.3541	2.10424	1.98726	2.51304	2.0513	2.05037	1.95344	1.97468	2.24754	2.43654	2.57035	2.13734	2.04565	2.48977	1.53454	2.42078
YAL044C	2.43532	2.18023	2.42453	2.55137	2.38536	2.50035	2.34089	2.26949	1.93966	2.15466	2.2915	2.10721	3.2066	3.04212	3.01987	3.03605	3.21654	3.13732	1.73924	1.10653	3.13207	3.04624	1.78641	2.36706	2.42298	2.38677	2.43962	2.63049	2.15867	2.24668	2.61419	2.16158	1.7484	1.66228	2.15179	2.28296	2.50654	2.03429	2.35583	2.75659	1.90514	2.30533	2.14836	2.11387	1.7776	2.39199	2.34064	1.88736	2.84079
YKL139W	-0.97093	-0.87429	-1.03685	-1.1529	-0.88591	-0.69161	-1.41811	-1.15319	-1.2099	-1.12734	-1.30365	-1.32083	-0.92743	-1.10996	-0.97513	-1.16393	-1.19791	-1.33935	-1.30698	-0.66758	-0.83267	-1.29794	-1.58798	-0.69427	-1.36479	-1.49988	-1.0886	-1.35274	-0.919	-1.03525	-1.18718	-0.66947	-0.81974	-1.21673	-0.92789	-0.64404	-1.25975	-0.92518	-1.17448	-0.63148	-1.09406	-1.18489	-1.17381	-1.32693	-0.92813	-0.86578	-0.77588	-1.08291	-0.63819
YKL197C	-1.02893	-0.79048	-1.13715	-1.01102	-0.79114	-1.03517	-1.20304	-0.97929	-1.06567	-1.07151	-1.112	-0.93599	-1.04748	-0.78277	-0.94303	-0.64365	-0.80836	-0.95326	-1.06231	-0.83072	-0.82591	-1.22802	-1.13663	-1.14805	-1.12774	-1.30014	-0.96732	-1.24898	-0.99158	-1.15958	-1.35101	-0.7025	-0.61807	-0.79115	-0.73956	-0.92721	-1.23053	-1.24044	-0.88455	-1.06738	-1.19095	-1.12374	-0.96691	-0.54989	-1.23707	-0.94774	-1.18125	-1.11067	-0.83534
YGR138C	1.72204	1.43576	1.37306	1.63882	1.40107	1.20988	0.56867	0.47412	0.71038	0.43678	0.30773	0.23844	0.86466	0.87045	0.75357	1.1735	0.98568	0.79073	-0.02855	0.47097	-0.00616	0.39295	1.14695	0.45515	1.40601	1.77355	1.18113	1.62076	0.73664	0.91575	0.63904	0.11196	-0.65485	-0.06477	0.8784	0.60427	0.12729	0.17426	1.46582	0.47705	0.62397	1.177	0.97722	0.80225	1.02366	0.95864	1.19776	1.68587	0.85077
YHR129C	-2.23696	-1.63731	-2.09206	-1.85036	-1.70487	-1.98351	-1.94326	-1.79329	-2.30413	-1.85891	-1.98916	-1.66123	-1.93511	-1.87072	-1.94779	-1.57004	-1.6797	-1.90732	-1.99531	-1.74629	-1.86062	-1.85885	-2.39879	-1.64384	-1.72115	-1.99258	-2.24607	-1.85999	-2.4009	-1.90174	-1.89778	-1.46245	-1.68489	-1.10613	-2.18831	-1.87148	-2.21853	-1.62375	-2.00894	-1.45896	-1.6262	-2.0515	-2.09166	-2.08441	-2.08744	-1.75493	-1.9765	-1.93407	-1.95781
YLR436C	1.20137	1.37381	1.19091	1.23933	1.08953	1.27331	1.39305	1.51685	1.40754	1.34089	1.33302	1.30167	1.06372	0.93862	0.97812	1.20832	1.04796	1.18686	1.41589	1.23502	1.92307	1.93193	1.65561	1.27703	1.89815	1.59393	2.04055	1.67178	1.12932	1.45241	1.63133	1.69478	1.42894	1.25097	1.37534	1.20218	1.92709	1.47324	1.68364	1.13822	1.58931	1.87931	1.70022	1.47437	1.71023	1.3629	1.73457	1.8106	1.61438
YOR253W	0.02013	0.27005	0.11395	0.07532	0.09207	0.26883	0.56338	0.4839	0.32277	0.53336	0.50272	0.63523	0.26986	0.52168	0.75123	0.83418	0.54408	0.59874	0.78411	0.50318	0.72316	0.37705	0.59174	0.86318	0.5873	0.00535	0.18744	0.35599	0.53579	0.28218	0.69697	1.18081	1.18692	1.3649	0.63826	0.71089	0.65606	0.15414	0.45476	0.73273	0.34234	0.01232	-0.11553	-0.0966	0.57632	0.38981	0.8536	0.23376	0.68292
YNL268W	2.15368	2.07493	1.99055	2.09847	2.30208	2.31118	2.05089	2.18114	2.16509	2.16517	2.26703	2.21823	2.39048	2.36462	2.1697	2.30136	2.3687	2.26819	2.31985	2.16129	2.21147	2.17291	2.34769	2.33413	2.29702	2.12004	2.34636	2.12221	2.30891	2.0363	1.98428	2.5451	2.52675	3.0386	2.27196	2.28523	2.57006	2.48338	2.38269	2.30033	2.4462	2.82186	2.57021	2.62522	2.15896	1.80192	2.62938	2.2878	2.18904
YIL105C	0.28283	0.63432	0.50356	0.47422	0.1328	0.5349	0.55062	0.44775	0.67777	0.54257	0.55453	0.48211	-0.06992	0.03766	0.34699	0.20745	0.022	0.3379	0.14195	0.71207	1.09019	0.70195	0.00787	-0.04795	0.08083	0.09535	0.78069	0.41723	0.85495	0.53524	0.1903	0.46334	0.32605	0.66491	0.31052	0.37703	0.77668	1.12595	0.01263	-0.12649	0.7813	0.3716	0.45815	0.26252	0.80059	0.79262	0.68627	1.18798	0.61338
YDR403W	-3.62849	-2.7613	-3.0341	-3.16455	-3.25862	-3.14341	-3.85943	-3.74657	-3.83548	-3.87433	-3.82803	-3.80418	-3.81148	-3.3941	-3.6497	-3.27788	-3.81047	-3.45113	-2.76115	-2.60904	-3.50817	-3.38217	-2.43744	-2.97055	-3.3031	-3.04591	-3.35599	-3.01402	-3.31515	-2.71515	-2.7301	-2.97692	-3.19742	-2.95232	-3.19633	-3.02428	-3.68477	-3.58429	-3.45305	-3.23892	-2.89345	-3.48121	-3.16014	-3.39634	-3.26708	-2.7331	-3.37394	-1.7181	-3.01185
YDL029W	2.84745	3.11999	2.87798	2.89789	3.10811	3.05099	2.95844	3.06124	2.78238	2.90997	2.8459	3.03195	2.81065	3.16108	3.09756	3.10025	3.15563	3.10315	2.78343	2.99674	3.06461	2.87068	2.53886	2.69119	2.78866	3.00024	2.82862	2.73836	2.78279	2.54141	2.54371	2.95769	2.82488	3.25423	3.01396	2.87156	3.08069	3.2287	2.7584	2.85072	2.81013	2.79831	2.62022	2.79496	3.07679	3.09932	3.39832	3.1897	3.06423
YOR132W	1.35106	1.48777	1.39197	1.1618	1.00666	1.17342	1.36159	1.20022	1.30047	1.2682	1.22015	1.18943	1.675	1.19784	1.47147	1.25019	1.44652	1.64137	1.1765	1.61393	1.29853	1.35834	1.31431	1.309	1.25535	1.32843	1.04	1.0887	1.67846	1.44557	0.76323	1.48017	1.44973	1.30492	1.29946	1.33825	1.24408	1.376	1.36934	1.39323	1.0898	1.03639	1.15819	1.43597	1.30523	1.44219	1.31799	1.25349	1.45575
YPR160C-A	-4.24077	-3.94455	-3.96415	-4.10066	-4.09804	-4.10229	-4.26295	-4.23732	-3.98731	-4.35216	-4.12518	-4.60599	-3.47041	-4.30558	-4.03741	-4.37097	-3.49637	-4.18942	-3.88785	-3.42151	-3.8209	-3.60801	-3.50095	-3.43585	-3.52461	-3.75641	-3.99884	-3.88488	-3.64537	-3.95507	-4.04912	-4.23655	-4.16507	-4.08545	-3.43587	-3.60254	-3.66994	-3.88895	-3.3662	-3.33761	-3.35029	-3.75879	-3.70742	-3.42032	-3.42682	-3.99421	-3.74463	-4.38208	-3.8902
YCL026C-B	-0.04542	0.14861	-0.22366	-0.41032	0.0987	-0.04982	1.14451	1.14096	0.89174	1.12415	1.37538	1.13363	-1.47663	-1.87072	-1.2952	-1.55366	-1.40076	-1.49936	1.85779	0.85232	0.83124	0.42838	1.53779	1.64352	1.18382	1.14604	1.86714	1.67178	1.74304	1.67808	1.90845	1.72042	0.53982	0.07858	1.85839	1.43416	0.56958	0.0526	0.44	0.47188	0.40707	0.77624	1.78801	1.82876	-0.06662	2.02432	1.355	2.93314	1.54605
YPR092W	-5.65	-4.87219	-4.89696	-5.33053	-5.2707	-4.58673	-4.32657	-4.11043	-4.63077	-4.66907	-4.9549	-5.44775	-4.75861	-4.96252	-4.29471	-4.5331	-4.88619	-4.65113	-4.03719	-4.0311	-4.00163	-3.67427	-3.97961	-4.97925	-4.15918	-4.22229	-3.27491	-4.28037	-4.36052	-4.25997	-3.87462	-4.38622	-4.32839	-4.59614	-3.46588	-4.50126	-3.93147	-4.28449	-4.17248	-4.84432	-3.96667	-3.86761	-3.88724	-4.02264	-4.3399	-4.03173	-4.69166	-4.39978	-3.73984
YDR525W-A	3.18801	3.06961	2.85208	3.07023	2.95243	2.82489	2.27431	2.08619	2.37796	2.23816	2.30804	1.85425	2.64466	2.48904	2.15163	2.1409	2.6053	2.48946	2.68449	2.41478	2.40228	2.66843	3.3139	1.70672	3.11448	3.63546	2.5608	3.28379	2.25751	2.56399	2.96635	2.78929	1.57909	1.91438	2.56929	2.57491	2.72466	2.64935	2.98676	2.41295	3.02669	3.0152	2.97594	2.01919	2.37577	2.33604	2.77435	2.86015	2.89483
YPL255W	-1.21356	-1.07348	-1.26888	-1.23016	-1.37009	-1.10768	-1.85169	-1.57228	-1.55106	-1.33112	-1.44266	-1.52553	-0.99425	-1.0978	-1.20783	-1.0662	-1.32762	-1.2085	-1.85986	-1.19242	-1.26503	-1.43954	-1.8082	-0.75765	-1.26028	-1.36748	-1.38242	-1.44233	-1.89396	-0.26363	-1.48571	-1.18775	-0.88381	-0.29628	-1.8613	-1.39574	-1.90793	-1.03849	-1.60698	-0.8464	-1.27529	-1.59685	-1.64676	-1.54326	-1.39905	-0.31349	-1.83735	-1.7361	-1.43651
YEL012W	1.35341	1.84931	1.85957	1.76058	1.51383	1.8561	1.46047	1.8859	1.80135	1.70659	1.77325	1.51675	1.07802	1.04584	1.10291	1.07585	1.09713	1.47035	0.62037	1.60827	1.50014	1.35977	0.50801	0.8582	1.41448	1.64898	1.35634	1.51368	1.64077	1.67285	1.63197	1.72654	1.37004	1.9696	1.05163	1.16911	0.90432	2.33444	0.78397	1.04422	1.77927	0.61534	1.82941	1.49321	1.57617	2.09668	1.49614	0.88584	1.45594
YOR192C	-2.42425	-2.11206	-2.50415	-2.07365	-2.42912	-2.25546	-3.01937	-2.57648	-2.90861	-2.56271	-2.81898	-2.87918	-2.36931	-2.39481	-2.68443	-1.93032	-2.2757	-2.35502	-2.21963	-1.75616	-2.56321	-2.36252	-1.65064	-2.1118	-2.45946	-2.27905	-2.42441	-1.9945	-2.5953	-2.56024	-2.69755	-2.51479	-2.53593	-1.95579	-1.73871	-1.89677	-2.32959	-2.45015	-2.31809	-2.2248	-2.26698	-1.82608	-2.46201	-2.06125	-2.4136	-2.5112	-2.9367	-2.09236	-2.40802
YGL229C	0.36794	0.42288	0.35606	0.35725	0.1507	0.48427	0.24083	0.56253	0.51089	0.15585	0.27461	-0.04212	-0.08061	-0.023	-0.12668	-0.07581	0.04519	-0.10747	0.65324	0.26054	0.38675	0.68974	0.98913	-0.14753	0.73806	0.42233	0.62569	0.76115	-0.08388	-0.31965	0.91783	0.23833	0.17046	-0.67286	0.5553	0.34794	0.10439	0.00363	0.15072	-0.37618	0.60551	0.83092	0.43667	-0.00011	0.27011	-0.11878	0.87643	0.9919	0.72064
YER065C	0.10346	0.39943	0.06523	0.1854	0.05156	-0.12237	-0.46946	-0.3901	-0.52603	-0.52151	-0.58895	-0.37368	-1.59376	-1.32865	-1.36777	-1.24997	-1.45976	-1.06943	-0.12091	-0.28028	-0.19604	-0.33967	-0.64555	-0.71783	-0.19512	-0.1619	-0.19717	-0.07821	0.07034	-1.04267	-0.80707	0.0032	0.69689	0.41471	0.16329	-0.30752	-0.09381	0.03929	-0.06229	-0.24163	-0.45264	-0.41708	0.36271	0.32402	-0.07835	-0.80378	-0.46747	-0.51675	-0.46958
YPR194C	-1.24298	-0.92236	-1.05758	-0.71346	-1.22446	-1.26744	-0.84628	-1.59291	-0.96817	-1.46805	-0.59065	-1.80083	-4.60529	-4.72624	-4.63305	-4.37097	-4.48577	-4.53504	-1.42924	-1.61035	-2.98332	-2.3859	0.15224	-0.15573	-2.96397	-2.858	-2.75685	-0.48943	-0.54522	-1.16245	0.03868	-0.02967	-0.49877	-0.65622	-0.91724	-1.36237	-2.84942	-2.92989	-2.25349	-1.636	-0.55738	-0.03002	-0.74945	0.31395	0.21618	-1.20957	-3.00047	-3.47668	0.46981
YOL005C	2.67455	2.63099	3.00274	2.72045	2.90829	2.66433	2.75606	2.85286	2.93317	2.5631	2.91359	2.51566	2.97694	2.90028	2.77296	2.57832	2.75261	2.25226	3.32812	2.32014	3.49414	3.23475	2.72136	2.90062	3.2375	3.21122	2.86331	2.82771	2.48368	2.98536	2.69162	3.57823	3.42631	3.47989	2.92923	2.58343	3.42135	3.10448	2.75469	3.07053	2.77673	2.74998	2.83869	3.03888	2.864	2.91221	3.23176	2.50836	3.18728
YML052W	2.62832	2.77698	2.27502	2.5238	2.43371	2.21766	2.72259	2.46149	2.93864	2.79222	2.70597	2.6899	2.93139	2.67487	2.52738	2.68244	2.59177	3.04413	2.54496	2.24031	2.57182	3.27043	3.56547	2.43651	3.32491	3.54325	3.18785	3.71922	2.81016	2.64238	3.09192	2.82417	2.8395	2.85986	2.3578	2.12464	2.8937	2.97691	3.25723	2.42435	3.00416	3.49984	2.89248	3.17555	2.74331	2.47583	2.90621	3.03478	2.44345
YML064C	0.29276	0.20986	0.31189	-0.00954	0.60176	0.48342	0.13065	0.17751	0.19354	0.23791	0.21481	0.18944	0.61398	0.66036	0.54014	0.13095	0.47332	0.36284	0.11086	0.28469	0.6651	0.53152	-0.15254	0.63127	-0.02598	-0.07402	0.14198	-0.09611	0.32043	0.58651	-0.30486	-0.62912	0.15392	-0.82754	-0.3475	0.20688	0.0877	-0.03592	0.13301	0.58146	0.00409	-0.09318	0.37768	-0.07276	0.26643	0.2112	0.17961	0.06179	0.48273
YHL019C	-0.32385	-0.33638	-0.33953	-0.44897	-0.38882	-0.30133	-0.48797	-0.44048	-0.46078	-0.43471	-0.26613	-0.55706	-0.34433	-0.57869	-0.54293	-0.77077	-0.76494	-0.85377	-1.03514	-0.3333	-0.45639	-0.24893	-0.67646	-0.39141	-0.53799	-0.26907	-0.36663	-0.51482	-0.54928	-0.664	-0.43075	-0.34522	-0.50671	-0.44941	-0.65927	-0.38068	-0.78935	-0.13016	-0.42217	-0.33586	-0.49571	-0.69091	-0.34884	-0.26715	-0.61164	-0.41711	-0.4338	-0.62947	-0.48428
YBR167C	-0.98037	-1.39774	-1.28268	-1.22433	-1.47336	-1.05774	-1.44847	-1.3366	-1.21811	-1.47078	-1.35356	-1.16419	-1.24427	-1.27122	-1.37834	-1.13682	-1.76025	-1.06762	-1.07817	-0.95381	-1.14109	-1.39706	-1.71081	-0.62542	-1.11656	-1.52539	-1.25607	-1.17019	-1.30385	-1.07048	-1.01669	-1.47624	-1.46738	-1.83259	-1.02645	-0.89992	-1.04426	-1.25426	-1.52988	-0.76662	-1.13343	-1.66486	-1.12919	-1.25235	-1.02031	-0.94311	-1.32391	-1.15815	-0.76087
YHL046C	0.91277	0.67131	1.04716	0.50036	0.41452	0.57605	-0.70783	-0.82279	-0.83658	-0.34341	-0.89344	-1.16781	0.93586	0.59583	0.76125	0.68424	0.44078	1.12255	0.3773	0.9411	-0.9615	-0.48385	0.22257	-0.28488	0.54826	0.58736	-0.59778	-0.13492	0.06228	0.67565	-0.29824	0.44476	0.02688	-0.14638	0.27963	0.69017	-0.60585	-0.85993	-0.01621	-0.83292	-0.37424	-0.98227	0.52846	-0.24888	-0.16095	0.35514	-1.18181	0.1303	-0.05546
YFL016C	2.60787	2.66888	2.69243	2.58167	1.63199	2.04515	2.15863	2.09818	2.43776	2.31802	2.28316	2.52957	1.79684	1.14843	1.54394	1.35648	1.30504	1.45925	2.18392	2.59282	1.74791	2.18917	2.52399	1.30526	2.08805	2.10151	2.09436	2.13974	3.27338	2.648	2.36292	3.09365	2.10014	2.61129	2.95151	2.77482	1.71316	1.58324	2.48976	1.86854	2.29848	2.84195	2.44078	2.49583	1.83249	2.50118	2.13885	2.18019	2.26536
YPR176C	0.69479	0.34688	0.42962	0.94583	0.57512	0.46839	0.5645	0.77498	0.77665	0.62845	0.65132	0.40719	0.85919	0.90261	0.5472	0.84921	1.18939	0.86192	0.41333	0.28221	0.13656	0.76459	0.77973	-0.10012	0.59678	0.56108	0.34397	1.0877	0.41503	0.71162	0.94984	0.42937	0.04536	0.44782	0.41455	0.1259	0.46915	0.2625	0.79726	-0.10362	0.65124	0.9145	0.76551	0.70834	0.40106	0.1474	0.72182	0.73044	0.14138
YLR383W	-1.84109	-1.66925	-1.54183	-1.65823	-1.65455	-1.64667	-1.72792	-1.58591	-1.69642	-1.52354	-1.7754	-1.5516	-1.97417	-1.82915	-2.0086	-2.10304	-2.19084	-2.02328	-2.11248	-1.44601	-1.62046	-1.62826	-2.28849	-1.54411	-1.50361	-1.62136	-1.86485	-1.96602	-1.75667	-1.32608	-1.85406	-1.12835	-1.7691	-1.72523	-1.78636	-1.51095	-2.00447	-1.44922	-1.60148	-1.22904	-1.38611	-2.04734	-1.77257	-1.55352	-1.82625	-1.27584	-2.26153	-2.13638	-1.77807
YDR140W	0.21037	0.00926	0.36929	0.11411	0.31414	-0.19519	0.17339	-0.00652	0.06653	-0.05269	0.14245	0.0334	0.19473	0.41025	0.44571	0.05022	0.07876	0.04352	0.73357	0.17678	0.33765	0.3142	-0.17758	-0.0487	-0.0498	0.18142	-0.0129	0.14092	0.58169	0.35303	0.13451	-0.24056	0.02275	-0.33887	0.35032	0.03975	0.10213	0.17444	0.25099	0.29735	-0.38575	-0.22127	0.15469	-0.02171	0.31519	0.20472	0.00991	0.12439	0.41529
YJL062W	0.90817	0.83254	0.54989	0.71614	0.7935	0.75359	1.21886	1.16396	1.14106	1.19683	1.20894	1.04072	1.61176	1.4598	1.26021	1.59547	1.71143	1.6046	0.91896	0.59526	1.14704	1.47844	1.77432	0.82889	1.48122	1.28448	1.22274	1.87331	0.47742	1.07928	1.58201	0.69258	0.80358	0.67992	0.77445	0.76112	1.32707	0.80502	1.44381	0.85301	1.24533	1.57295	0.88505	1.2022	0.72846	0.71477	1.37702	1.25203	0.74163
YNL252C	0.29759	0.24127	0.20197	0.0192	0.56108	0.58639	0.95848	0.85245	0.75011	1.06481	1.08353	0.86051	1.25139	1.20017	1.286	1.28492	1.453	1.38567	0.10294	0.48365	0.73737	0.74575	0.78495	1.3965	0.4388	0.00646	0.4683	0.57321	0.26063	0.20293	0.66251	1.07596	0.43875	1.00805	0.2245	0.5122	0.24261	0.47632	0.551	1.24984	0.66578	0.49729	0.08721	0.22096	0.86437	0.67022	0.99589	0.86824	0.655
YLR048W	3.94893	3.74833	4.05787	3.69044	4.09298	3.66925	5.56317	5.06925	5.22057	5.2241	5.38149	5.13911	5.69334	5.51091	5.80214	5.67478	5.61091	5.67142	4.64069	3.69034	4.44612	4.47425	4.99859	4.76822	4.84016	4.20516	5.0273	4.38704	4.37236	4.65383	5.69212	4.95522	4.64593	5.48495	4.68616	4.32535	4.83625	4.18686	5.07475	4.6173	5.23879	5.27523	4.8967	5.43086	4.51946	4.48189	5.50974	4.58204	4.83911
YGR282C	4.1757	4.21756	3.94939	4.25092	4.09342	4.04259	4.8047	4.67798	4.83249	4.81097	4.89639	4.93374	4.89608	4.77224	4.58369	5.09439	5.16158	5.08434	4.2878	4.07252	4.06885	4.52358	5.0541	4.05862	4.38148	4.67757	4.97312	5.65183	3.87958	4.75368	5.13275	4.55091	4.21665	3.98312	4.76117	4.35752	4.29174	4.16747	4.69067	4.02486	4.58427	5.60565	4.40972	5.58475	4.21733	4.50969	5.39536	5.09697	4.48494
YEL033W	3.5897	1.70396	3.55578	2.69613	1.24831	3.20297	3.31556	2.9757	4.25182	2.78035	3.44267	1.63105	4.40122	3.5672	4.73916	3.01926	3.03397	2.29209	2.50767	3.61304	2.66722	3.25022	0.54985	2.04762	2.58083	1.88299	3.20675	3.64032	2.48012	2.94878	2.75406	-3.54647	0.29407	-3.08652	2.41932	3.30983	0.86616	1.58296	0.91104	2.60407	3.52464	2.24995	3.12441	0.67649	3.56151	2.9306	2.02992	2.97	3.60636
YMR196W	3.06558	2.98262	3.07604	2.93524	3.15248	3.2356	3.52591	3.78892	3.71777	3.57621	3.63111	3.61681	2.31894	2.62851	2.71195	2.42382	2.71451	2.71873	2.98698	3.11158	3.97391	3.4896	2.80491	3.03983	3.34876	2.83592	3.72755	3.34483	2.3252	2.44357	2.34202	3.14675	3.3696	2.84022	2.8471	2.77405	3.69801	3.51755	2.98268	3.12811	3.36329	3.06757	3.2148	2.53621	4.24366	2.94991	4.11243	3.73174	3.96371
YOR205C	-1.06772	-1.00911	-1.0298	-1.53961	-0.68524	-1.00841	-0.58649	-0.78009	-0.62366	-0.52898	-0.60475	-0.6514	-0.03213	0.02767	-0.31684	-0.14731	-0.12274	-0.41227	-0.6879	-0.95749	-0.4032	-0.71329	-0.6909	-0.11573	-1.32061	-1.35244	-0.96865	-1.34641	-1.30465	-1.14695	-1.25428	-0.88161	-0.5521	-0.84992	-1.03731	-0.80108	-1.00197	-1.06231	-0.85859	-0.31639	-1.09529	-1.1618	-1.26034	-0.87279	-0.95702	-1.19024	-1.13743	-1.27191	-0.74119
YBR188C	-0.13308	-0.29772	-0.28321	-0.70467	-0.04938	-0.64432	-0.17988	-0.25373	-0.06713	-0.04527	0.02346	-0.14133	-0.01195	-0.51843	-0.65761	-0.92623	-0.1182	-0.95597	-0.48821	-0.24436	0.41227	0.67357	0.0222	0.31175	0.16631	0.73014	0.25501	0.58212	0.18859	0.00527	-0.06874	-0.72265	-0.36245	-0.79605	-0.45683	-0.16626	-0.06008	0.57702	-0.00718	0.40362	0.01513	-0.53284	0.01727	0.0165	0.67118	0.26604	0.03291	-0.06103	-0.09238
YER056C	0.7245	0.32963	0.67176	0.64879	1.15589	0.69539	0.86292	0.34387	1.21365	0.78391	0.96207	0.90152	1.18425	0.6449	0.97447	1.16997	1.00518	0.78604	1.72465	0.73257	0.59644	0.66292	1.28538	1.74395	1.029	0.73741	1.14764	0.79597	0.48205	0.49267	1.42205	1.0699	0.63945	1.18426	1.31398	1.30416	1.1767	0.90738	1.24553	1.4407	1.05049	1.714	0.43418	0.31335	0.89318	-0.05171	1.40435	0.26192	0.35399
YLR299W	-0.03042	0.21734	-0.17479	0.07866	0.04358	0.03779	1.39489	1.44796	1.08166	1.31287	1.26802	1.55181	0.04746	0.21459	0.07959	0.06679	0.10916	0.3263	0.86809	0.82817	0.99783	1.13545	0.62262	-0.30815	0.10868	0.3449	1.00831	0.9089	0.49912	0.8948	0.40044	0.58324	0.37223	0.54516	-0.03014	-0.05269	-0.07313	-0.2266	0.24975	-0.47164	-0.06603	0.39931	0.65335	1.04683	1.05771	0.65054	1.22134	0.92783	1.04775
YHR178W	-1.56469	-1.04841	-1.15513	-1.16922	-1.4541	-1.26748	-0.9779	-1.18076	-1.1581	-1.16753	-1.09829	-1.09652	-1.18937	-0.9431	-1.25369	-1.07932	-1.06779	-1.13046	-1.23718	-1.28924	-1.41224	-1.31667	-1.32122	-1.66402	-1.26075	-1.16829	-1.27279	-1.11509	-1.2496	-1.24059	-1.42667	-0.56044	-1.10803	-0.79168	-0.94237	-1.04158	-1.07422	-1.03769	-1.31629	-1.56442	-1.13895	-0.87268	-1.05893	-0.67859	-1.02268	-1.13511	-1.39118	-1.10911	-1.40097
YOR195W	-1.30102	-1.22508	-1.17736	-0.99981	-1.65599	-1.18203	-1.83949	-1.81169	-1.83175	-1.65355	-1.65566	-1.59838	-1.93834	-2.08401	-2.08251	-2.10332	-2.24104	-1.99958	-2.39439	-1.05886	-1.63924	-1.63093	-2.45271	-1.30038	-1.84457	-1.51891	-1.82672	-1.9692	-1.03835	-1.14836	-1.8361	-1.87072	-1.9982	-1.18138	-1.61726	-1.01974	-2.46969	-1.35808	-1.92945	-1.24339	-1.00764	-1.95092	-1.37819	-1.11063	-1.43477	-0.93686	-2.4138	-2.2948	-1.59201
YER114C	0.37692	0.36625	0.46167	0.19089	0.46939	0.41204	0.6735	0.56838	0.73076	0.51811	0.49575	0.6215	0.382	0.36706	0.48337	0.36005	0.51437	0.5579	0.41586	0.40602	0.55042	0.47219	0.49532	0.37022	0.59342	0.59495	0.36351	0.15621	0.64438	0.39227	0.25788	0.49411	0.65241	0.33899	0.08966	0.20842	0.57581	0.83756	0.6934	0.63985	0.60551	0.7312	0.72238	0.6139	0.49467	0.53023	0.99815	0.6903	0.36148
YOR192C-C	1.49183	0.96934	1.44067	1.09678	0.79056	1.73214	-3.6325	-4.01529	-3.98634	-3.97047	-3.62015	-4.56365	-1.09895	-1.76591	-1.12314	-2.08288	-1.8912	-1.88364	1.55223	3.06254	-2.41748	-2.44904	1.49998	2.68542	-1.84379	-1.31653	1.51422	0.30102	2.24638	-0.98663	-2.30068	-2.2865	-2.62502	-2.35095	1.53135	2.35114	2.74502	2.7832	-0.82387	-0.28316	1.33959	-0.2287	2.82834	0.37971	1.17943	-0.77229	-3.804	-1.56618	-1.88111
YJL191W	3.96741	3.60528	3.78578	3.50201	3.80435	3.69664	5.22186	4.50389	4.39015	4.91126	4.86344	4.41147	5.49151	5.19389	5.47918	5.16681	5.26968	5.12655	3.87048	3.71564	3.66934	3.66195	4.33021	3.9719	4.08887	3.89358	3.74616	3.44328	3.75779	4.45198	4.13525	3.86898	4.1051	3.71009	3.87151	4.37314	3.64261	3.43102	4.55275	4.30435	4.05605	4.35295	4.12221	4.16036	3.86263	4.22649	4.18255	4.05003	3.97652
YGL258W	-3.54605	-4.12511	-2.96504	-2.95394	-3.11261	-3.41551	-2.48849	-3.69853	-4.26467	-3.86336	-4.44852	-3.49323	-3.5438	-3.70163	-4.20053	-4.94691	-0.94882	-4.6949	-2.96667	-2.87189	-3.59084	-2.93378	-2.95222	-3.08915	-3.7263	-2.86434	-3.68074	-2.86349	-3.4922	-2.66886	-3.42182	-3.28144	-3.40388	-4.79231	-3.39706	-2.93887	-3.39292	-3.36681	-3.44623	-3.1798	-3.11156	-2.63865	-3.29288	-3.62415	-3.25502	-3.16322	-2.92277	-3.45486	-2.67527
YIL002C	-0.50403	-0.4695	-0.47098	-0.39471	-0.26852	-0.26206	-0.2441	-0.15442	-0.28633	-0.16892	-0.2502	-0.17679	-0.11885	-0.04415	-0.12768	0.02361	-0.22758	-0.09788	-0.54081	-0.26276	-0.24517	-0.07487	-0.37124	-0.31441	-0.37366	-0.39309	-0.4629	-0.58015	-0.4896	-0.35968	-0.70097	-0.146	-0.48968	-0.36978	-0.36529	-0.39577	-0.42679	-0.43094	-0.22073	-0.1075	-0.47596	-0.50636	-0.65493	-0.30174	-0.59183	-0.43168	-0.54558	-0.55629	-0.54977
YDR518W	1.62095	1.75138	1.50594	1.8543	1.66308	1.69381	1.33344	1.58018	1.71576	1.37922	1.46028	1.25927	1.6755	1.83702	1.67409	1.68347	1.69405	1.7671	1.85498	1.85921	1.01945	1.29204	1.77721	1.26262	1.74751	1.56382	1.75844	1.85438	1.46666	2.18847	1.61903	1.24978	1.44151	1.09093	1.96295	1.83356	1.49634	1.16507	1.69456	1.5104	1.33128	1.70559	1.75522	1.84569	1.15408	1.80889	2.05056	1.84834	1.48665
YKR021W	-0.11554	0.03452	0.06546	-0.09552	0.00541	0.14399	0.41924	0.25324	0.16908	0.24894	0.3466	0.24837	0.09953	0.25826	0.25848	0.18699	0.36187	0.37249	0.83231	0.31285	0.327	-0.03897	0.2875	0.26459	0.06577	-0.15948	0.31132	-0.17271	0.26461	-0.16631	0.50291	0.65497	0.72278	0.62583	0.40798	0.19777	0.51981	0.3131	0.21948	0.36135	0.10501	0.09435	0.16009	0.4739	0.25423	-0.04033	0.41044	0.28258	0.27493
YLR328W	0.11742	0.27506	0.11512	0.18764	0.1544	0.04732	0.09581	-0.2614	-0.08335	-0.14367	-0.15069	-0.00519	-0.26752	-0.22475	-0.10493	-0.07382	-0.26276	-0.39252	0.03268	-0.31353	-0.55326	-0.41827	0.00093	-0.44126	0.15335	0.13842	0.37352	0.29348	-0.13937	0.48941	0.34631	0.36153	-0.06198	0.04928	0.22231	0.21718	0.30806	0.10395	0.27619	0.07182	-0.1166	0.2881	0.47312	0.67802	-0.14562	0.08866	-0.47272	-0.26785	-0.08026
YKL173W	-0.53995	-0.6605	-0.55315	-0.58119	-0.29928	-0.509	-0.74002	-0.79156	-0.66804	-0.68993	-0.85221	-0.74397	-0.61029	-0.44454	-0.50078	-0.66427	-0.50818	-0.55074	-0.73743	-0.58723	-0.52358	-0.92933	-1.03899	-0.42355	-0.96126	-1.20657	-0.6859	-0.84428	-0.58265	-0.58079	-1.0658	-0.84678	-0.75946	-1.10287	-0.69893	-0.62802	-0.83299	-0.69551	-1.09086	-0.74008	-0.66522	-0.87356	-0.60237	-0.99773	-0.53357	-0.43037	-0.70606	-0.5814	-0.38405
YBL003C	3.98142	3.91216	3.95943	3.83199	4.14178	3.80844	4.20845	3.80324	4.31289	4.33841	4.06104	4.07525	3.8245	3.72439	4.17814	3.30688	3.30847	3.69404	3.73145	4.06854	3.96314	3.76184	3.4473	4.27171	4.0008	4.38116	3.67988	4.12729	3.76864	4.35583	4.50151	4.29901	3.81891	4.09583	3.64622	4.01361	3.78416	4.53556	3.71663	4.18085	3.94725	3.38617	4.00474	3.76685	4.42772	4.17231	3.85216	4.06971	4.21234
YNR013C	1.85299	1.6632	1.46419	1.58862	1.78953	1.63395	2.232	1.99504	2.21304	1.91482	2.13991	2.03905	2.14575	1.94904	1.86029	1.91143	1.97187	1.67157	1.99009	1.48792	2.25038	2.21414	2.54185	1.85452	2.47725	1.96376	2.24254	2.05402	1.76504	2.30351	2.10661	1.94713	2.37713	2.24733	2.20959	2.10303	2.31928	1.98525	2.37223	1.81711	2.29692	2.49309	2.16577	2.35166	2.06086	1.98752	2.39943	1.81194	2.28208
YJR077C	2.862	2.50184	2.32582	2.8126	2.89945	2.27706	4.3443	3.99963	4.19612	4.12505	4.51932	4.03931	4.91181	4.7515	4.48563	4.70126	4.96225	4.77994	3.63685	2.8075	3.83726	3.91781	4.3444	3.83258	3.67865	3.31001	4.22762	3.88364	2.9507	3.36475	4.80753	4.20132	3.59572	4.14692	3.06205	3.01562	4.15752	3.4016	3.70363	3.67609	3.97163	4.42771	3.29299	3.96495	3.22562	3.29412	3.98491	3.35481	3.37069
YDR376W	-0.33067	-0.0913	-0.3649	-0.05349	-0.44685	-0.58906	-0.01365	0.03305	0.08122	-0.19798	-0.04282	0.14316	-0.17213	-0.13593	-0.08754	0.29631	0.23023	0.01491	-0.15834	-0.18101	-0.36397	0.13579	0.30391	-0.67301	-0.12381	0.15414	-0.12884	0.05384	0.10001	-0.33951	-0.30316	-0.3409	-0.12535	-0.92898	0.23671	-0.0687	-0.01976	-0.15987	0.09888	-0.45313	-0.33746	0.26782	-0.27945	0.19393	-0.38451	-0.29586	0.24359	0.05568	-0.20201
YJL120W	-4.33623	-4.47625	-4.45124	-4.51075	-4.72684	-4.53209	-4.32814	-4.78305	-4.71506	-4.98052	-5.06608	-4.84448	-4.96348	-4.52403	-4.50029	-4.38179	-5.25693	-4.74855	-3.73539	-3.93379	-3.66487	-3.67534	-3.74126	-4.22201	-3.90268	-3.7178	-4.34857	-3.75996	-3.80235	-3.89479	-3.85217	-3.44908	-3.58693	-3.8022	-4.11048	-3.73244	-3.85682	-4.0241	-3.74636	-3.66251	-4.24631	-3.88527	-4.01479	-4.71499	-3.88257	-3.18629	-3.9715	-3.91523	-3.75678
YPR078C	-4.55712	-4.33814	-4.66376	-4.53078	-4.67147	-4.58671	-4.60296	-4.76371	-4.59203	-4.79524	-4.76447	-4.30642	-4.67246	-4.71354	-4.6929	-5.05205	-4.57139	-4.3512	-3.73746	-3.54124	-4.11792	-3.68688	-3.98948	-3.717	-3.76844	-3.85205	-3.89819	-3.87781	-3.01471	-3.70992	-3.78544	-3.69644	-4.11381	-4.01377	-3.73838	-3.60831	-3.96728	-3.88896	-3.92996	-3.7011	-3.82354	-3.434	-3.73743	-3.82612	-3.96148	-3.84424	-3.84778	-3.92026	-3.67008
YGL058W	1.92902	1.78576	1.76903	1.98843	1.64812	1.73696	1.38829	1.16223	1.59638	1.36068	1.45016	1.18305	1.77621	1.51541	1.99855	1.69247	1.8809	1.94382	1.91142	2.08147	1.47037	0.96909	0.71482	1.10696	1.46342	1.41138	1.32223	1.37857	1.9503	1.77808	1.32665	1.74456	1.33886	0.82721	2.05037	2.16306	1.60848	1.82559	1.22032	1.69641	1.53497	0.95224	1.34857	0.78859	2.03119	1.62586	1.84289	1.44696	1.7494
YFL005W	2.10523	2.20326	2.1435	2.17189	2.11977	2.31633	2.08502	2.25374	2.30752	2.18327	2.16033	2.26232	1.94462	2.21552	2.15278	2.33718	2.28032	1.96424	2.20182	2.17396	2.26022	2.13136	1.75651	1.82016	2.0729	1.97695	2.01318	2.02613	2.16449	1.96256	2.27618	2.40375	2.18422	2.29491	2.77241	2.54552	2.42319	2.68917	1.85702	1.932	2.08439	2.28793	1.97409	2.26948	2.1709	2.22009	2.47617	1.96196	2.22174
YMR284W	-1.03246	-1.13861	-0.64111	-0.94092	-0.97061	-0.85537	-1.02343	-0.69577	-1.08396	-0.9156	-0.86684	-1.07458	-1.08707	-0.85811	-0.92159	-0.70921	-0.75064	-0.89224	-1.05334	-0.73422	-0.887	-1.11897	-1.71431	-1.35707	-1.11656	-1.14322	-1.26242	-1.11628	-1.34795	-1.30226	-0.91719	-1.62187	-1.27846	-1.86009	-1.19534	-1.18331	-1.53001	-1.04652	-1.50747	-1.19634	-1.04096	-1.53494	-1.48608	-1.35432	-0.76677	-1.03188	-1.13552	-0.66732	-0.95663
YML061C	-0.75673	-0.56155	-0.75328	-0.95857	-0.59845	-0.75662	-1.06445	-0.90409	-0.92815	-1.10104	-1.0846	-0.9504	-0.9121	-0.68085	-0.77913	-0.91711	-0.74703	-0.79439	-1.37923	-0.76633	-1.07568	-1.02296	-1.17674	-0.85695	-1.49402	-1.11372	-1.38853	-1.46214	-1.28596	-0.95019	-1.67421	-0.81984	-1.04372	-0.2521	-1.20643	-0.96232	-1.37999	-1.01036	-0.9728	-0.73736	-1.43719	-1.29198	-1.34703	-0.86116	-1.31488	-0.84292	-1.15746	-1.3381	-1.05446
YJL139C	-0.20606	0.04597	-0.26884	-0.24539	-0.12297	0.04391	0.19058	0.04231	-0.12092	-0.18315	0.01273	-0.21508	0.20669	0.50571	-0.00384	0.27011	0.08991	0.14185	0.07273	-0.2216	-0.07183	0.30683	0.10451	0.3374	0.1691	0.06647	-0.27732	-0.01514	-0.6804	-0.09957	0.218	0.0546	0.17046	-0.55099	-0.42244	-0.33615	-0.14151	-0.32338	-0.03489	-0.27833	0.34867	0.15338	0.06614	-0.20745	0.06442	-0.19705	-0.22238	0.16191	-0.46112
Q0045	4.28188	4.21735	4.14025	4.35289	4.20757	4.56233	5.17908	5.38732	5.47302	5.00403	5.09192	3.72285	5.48921	5.59646	5.56486	5.36723	5.38976	5.40673	3.85821	4.78051	3.84039	3.87215	3.99785	4.41519	4.05755	4.19211	3.611	4.36085	3.84492	4.25554	4.8926	3.62951	2.94345	1.84401	3.2786	4.18525	3.67783	4.06697	3.86055	4.10673	4.36209	4.4069	3.87317	2.67123	4.1	4.59779	4.14827	5.25612	3.77235
YDL129W	-1.35687	-0.96049	-0.91942	-1.14745	-1.10911	-1.46641	-1.48192	-1.58769	-1.41522	-1.70017	-1.68225	-1.04343	-2.2318	-2.00365	-2.12273	-1.87299	-2.41107	-1.53306	-0.78102	-1.28247	-1.45296	-1.43455	-1.3156	-1.58046	-1.37301	-0.99444	-1.51074	-1.382	-0.45756	-0.83754	-1.39605	-0.48092	-0.25547	0.33444	-0.75141	-0.96442	-0.77403	-0.79952	-0.72447	-1.29996	-1.38869	-0.93969	-0.66924	-0.35579	-1.32983	-1.26282	-1.97027	-1.69568	-1.54041
YLR449W	0.57693	0.34086	0.79304	0.44858	0.30024	0.19386	0.24542	-0.5149	0.21858	0.0444	0.05256	0.32764	0.78004	0.0884	0.2623	0.36144	0.15087	0.42251	0.45042	0.78448	-0.06102	0.28704	0.40268	0.83385	-0.18419	0.26143	0.05332	-0.19596	1.34342	0.5878	-0.65819	-0.08967	-0.07419	0.28841	0.44331	0.84467	0.12677	0.66972	0.64164	0.59531	0.74364	0.91513	0.84864	1.30104	0.38678	0.75266	0.14626	0.03686	0.24892
YAL037C-B	-4.46207	-4.59081	-4.81669	-4.02441	-3.80873	-4.57313	-4.69866	-4.15625	-4.35911	-4.92579	-4.49702	-4.52288	-4.81419	-4.07668	-4.30375	-4.91612	-4.41198	-4.76169	-4.11665	-4.18565	-4.27014	-4.18825	-4.10741	-4.14022	-4.28385	-4.24957	-4.12571	-3.91392	-3.89475	-4.24064	-4.11139	-4.04352	-4.30119	-3.58634	-3.88492	-4.01994	-4.04141	-4.17141	-4.16052	-3.90063	-4.02343	-3.85189	-3.87855	-4.09455	-4.31845	-4.1751	-3.6752	-3.72079	-4.13992
YLR021W	-0.50404	0.12082	0.04379	-0.30143	-0.28007	-0.41158	-0.25772	-0.24583	-0.20958	-0.18101	-0.20623	-0.11424	-0.31648	-0.243	-0.00425	-0.29212	0.1567	-0.38347	-0.15548	-0.15862	-0.20972	-0.41366	-0.64715	-0.06229	-0.53807	-0.26291	-0.13685	0.15743	0.00647	-0.13174	0.2268	-0.53478	-0.02633	-0.38729	-0.24083	-0.15978	-0.14836	0.21411	-0.30732	-0.00457	-0.2359	-0.64532	-0.16923	-0.21628	0.12969	-0.2359	-0.3115	-0.36848	0.17921
YDL007W	2.67228	2.49675	2.94031	2.72122	2.93644	2.98886	2.52229	2.74417	2.60386	2.81823	2.86583	2.61333	2.87032	3.05888	3.05739	2.58761	3.09744	3.0308	1.94319	2.86983	2.53736	2.32438	1.88405	2.87337	2.32913	2.27127	2.33195	2.16824	2.48727	2.8223	2.57838	2.82484	1.82855	2.36594	2.36623	2.84036	2.00674	2.63858	2.21934	2.98127	2.60637	2.01227	2.68623	1.78879	2.83721	3.01939	2.75844	2.30954	2.82507
YKR069W	-2.29827	-2.08301	-1.97413	-2.03837	-1.71463	-1.91033	-2.16896	-2.03444	-2.23885	-1.87935	-2.09818	-1.79569	-2.01327	-1.97947	-2.29041	-1.93893	-2.13033	-2.19517	-2.03814	-1.92165	-1.7496	-1.75455	-1.83261	-1.68118	-1.9245	-2.03193	-1.53112	-1.32398	-1.87797	-2.20781	-1.54273	-1.22065	-2.0458	-1.35217	-2.20202	-2.00609	-2.0374	-1.96866	-2.03346	-1.58622	-1.99288	-1.86397	-2.24629	-2.28601	-1.92006	-1.7701	-2.05928	-2.14673	-2.0999
YOR145C	-0.72972	-0.79704	-0.36913	-0.34509	-0.63424	-0.90472	-0.26237	-1.02466	0.13647	-0.44713	-0.52186	0.10049	-0.47165	-0.81502	-0.36445	-0.15025	-0.55107	-0.75809	-0.13218	-0.49647	-1.08753	-0.69948	-0.23413	-0.03094	-0.89754	-0.5956	-0.83431	-0.88883	-0.48662	0.12084	-0.50766	-0.62789	-0.88664	0.31908	-0.14208	-0.13117	-0.3921	-0.75383	0.07606	-0.30552	-0.43529	-0.1224	-0.30056	-0.00011	-0.81333	-0.47427	-0.53064	-1.57318	-0.97063
YMR317W	-4.07526	-3.43253	-3.62662	-3.59668	-4.07806	-3.8673	-2.55996	-2.62059	-2.44837	-2.55345	-2.80942	-2.25329	-3.64613	-3.75819	-3.62301	-2.9134	-3.93314	-3.57749	-2.5442	-2.63193	-3.02087	-2.82959	-2.99753	-3.51914	-1.95905	-1.31441	-2.32619	-0.91963	-2.58597	-2.17692	-3.39248	-3.10915	-3.09883	-2.97269	-2.82714	-2.77561	-2.54042	-2.66122	-1.34202	-2.52351	-3.09087	-3.44575	-1.91932	-1.19425	-3.2964	-2.59314	-3.60746	-3.81617	-3.29444
YOR287C	-3.56873	-2.96213	-3.01394	-2.93692	-3.14548	-3.1284	-2.7491	-3.19446	-2.83209	-2.81009	-2.67954	-2.56716	-2.71025	-3.30129	-3.24327	-2.68636	-3.32108	-2.88338	-2.94442	-2.47895	-2.89564	-3.12425	-3.12279	-1.71979	-2.95045	-3.06439	-2.53567	-3.09576	-2.72745	-2.32673	-2.8845	-2.04868	-2.85983	-2.3094	-2.86141	-2.11054	-3.13506	-2.78438	-2.85178	-2.17475	-2.54396	-2.62455	-2.52056	-2.32495	-2.82539	-2.43683	-3.08105	-3.2052	-2.671
YHR071C-A	-4.41333	-2.98712	-3.93178	-4.35259	-4.11675	-3.99242	-4.2634	-4.76388	-4.18558	-4.19915	-4.55599	-4.80853	-4.6558	-4.46362	-4.49495	-3.71728	-4.39451	-4.25625	-3.03554	-3.21242	-3.70797	-3.45907	-3.57612	-4.04898	-3.60576	-3.19845	-3.97635	-4.02588	-3.8154	-3.425	-3.53262	-3.45894	-3.84046	-3.80605	-3.39334	-3.77477	-3.44118	-4.09689	-3.66197	-3.31394	-3.77653	-3.57764	-4.09248	-3.20452	-3.7675	-3.82779	-3.09847	-3.55368	-3.62836
YIL122W	-1.00662	-1.02491	-1.22467	-1.56651	-0.91111	-0.98742	-0.64601	-0.59273	-0.98562	-0.48705	-0.53822	-0.47724	-0.72241	-0.81673	-0.85165	-0.94574	-0.82198	-1.27137	-1.49315	-1.51683	-0.32514	-0.54421	-0.96525	-0.50815	-0.42074	-0.52576	-0.7901	-1.37731	-1.73092	-0.60054	-0.87244	-0.7076	-0.70843	-1.05341	-1.15998	-0.65952	-0.26081	-0.1765	-0.26009	-0.16137	-0.49722	-0.62725	-0.58369	-0.31656	-0.56673	-0.40837	-0.09575	-0.01878	-0.21183
YPL218W	3.45413	3.92801	3.608	3.72853	3.51491	3.50148	3.87948	3.82696	3.84667	3.80378	3.83963	3.65114	4.41981	4.45678	4.50928	4.41967	4.87177	4.71463	3.78061	3.76027	3.59016	3.97368	4.03329	3.43127	4.09761	3.89419	3.98018	4.32223	3.56813	4.66571	4.43734	3.26232	3.59195	2.39457	4.05233	3.69962	3.7904	3.77855	3.90614	3.57747	3.76568	4.33591	3.74707	3.86107	3.77083	4.72803	4.09844	4.0407	3.8116
YGR296C-B	-1.55924	-1.53375	-1.61882	-1.51251	-1.01129	-1.69172	-0.7949	-1.24195	-0.9645	-1.18798	-1.04302	-0.98367	-3.36528	-3.19806	-3.61044	-3.39101	-3.21585	-3.66985	-1.32074	-2.02047	-2.44801	-2.27927	0.01322	-2.15452	-1.0394	-0.6828	-1.46471	-1.00946	-1.78256	-1.75625	-1.24264	-1.05338	-0.77065	-0.41344	-2.07157	-1.8682	-1.61394	-1.92815	-0.96062	-2.7829	-1.99788	-1.01704	-0.9995	-0.14094	-1.75896	-1.98281	-2.51134	-2.27634	-1.88963
YJL145W	0.00578	-0.20828	0.26259	-0.27652	-0.12307	0.04807	0.16811	-0.2447	0.26253	-0.27865	0.07132	-0.08795	0.34311	0.33828	0.43599	-0.19517	0.40804	0.01516	0.18869	-0.04674	-0.10864	0.05043	-0.54696	-0.18014	-0.17585	0.28298	-0.16972	-0.45371	-0.05844	0.47532	-0.05558	-0.63755	-0.13969	-1.04976	-0.22042	0.01105	0.23013	0.13617	0.01673	0.23311	-0.09209	-0.4232	-0.0877	-0.25025	0.08155	0.28563	0.02461	0.05249	-0.09292
YLR080W	-1.50352	-1.40547	-1.47037	-1.32942	-1.2085	-1.08385	-1.89387	-1.68458	-1.68505	-1.69246	-1.41293	-1.85988	-2.04693	-2.5254	-2.43176	-2.21277	-2.43281	-2.63191	-2.00835	-1.42136	-1.04557	-1.29652	-1.94723	-1.48152	-1.15371	-1.62311	-1.07462	-1.33619	-2.1566	-1.50948	-1.49201	-1.31229	-1.84426	-1.34042	-1.71525	-1.68071	-1.76254	-1.494	-2.0021	-1.77164	-1.21304	-1.68761	-1.74074	-1.69798	-1.60755	-1.46036	-0.85655	-1.20214	-0.91532
YPR037C	-0.14381	-0.12557	0.09377	0.30745	0.26531	-0.42878	-0.08148	0.02969	-0.11698	-0.33506	-0.22774	-0.07574	0.09816	0.32196	0.06188	0.41472	0.39406	0.30796	0.02893	-0.05059	0.16443	0.51024	0.65315	0.16891	0.43529	0.45674	0.02073	0.43038	0.12517	0.70298	-0.2343	0.5168	0.33572	1.58828	-0.06266	-0.09734	0.13666	-0.01662	0.33086	0.23465	-0.28242	0.08771	0.22399	0.91849	-0.47053	0.23109	0.54453	-0.2589	0.01999
YJR149W	-1.12536	-0.9752	-1.45226	-1.35684	-0.74679	-1.02746	-0.25774	-0.06753	-0.37949	-0.1805	-0.19413	-0.20654	-0.45545	-0.29179	-0.43822	-0.42883	-0.33976	-0.26907	-0.30115	-0.53569	-0.58774	-0.76591	-0.29278	0.5161	-0.49501	-0.93522	-0.9376	-1.42163	-1.81051	-1.43963	-0.51113	-0.54801	0.49529	-0.03083	0.07495	0.21481	-0.6473	-0.76527	0.0061	0.37724	-0.80558	-0.73789	-1.45444	-0.86779	-0.75103	-1.28938	-0.75349	-0.76117	-0.9076
YKL036C	-4.17807	-3.98382	-4.00504	-4.09403	-4.06935	-4.11986	-4.08038	-4.24631	-4.2444	-4.17144	-4.46788	-4.30596	-4.10279	-4.2565	-4.31021	-4.3736	-4.47633	-4.14272	-3.59821	-3.47478	-3.62696	-3.48431	-3.58817	-3.6393	-3.85017	-3.65441	-3.49595	-3.32614	-3.21985	-3.49737	-3.81289	-3.6339	-3.71786	-3.28072	-3.67066	-3.43728	-3.58709	-3.78963	-3.43617	-3.61409	-3.24023	-3.4548	-2.99414	-3.72309	-3.77573	-3.52817	-3.34523	-3.58752	-3.47018
YNR052C	1.62738	1.79304	1.83449	1.51013	1.67466	1.92612	1.88577	1.83831	1.84991	2.17913	1.87335	1.85777	1.76227	1.96632	2.09681	1.98365	2.09045	1.79889	1.73291	1.6653	1.63734	1.60086	1.84661	1.81576	1.54089	1.43678	1.61424	1.50468	1.82196	1.41542	1.7673	1.68766	2.08623	1.76728	1.48113	1.91976	1.87764	1.83221	1.65745	1.85603	1.93161	1.70017	1.66716	1.70696	2.12927	1.73417	1.95397	1.76005	2.04859
YPR198W	0.70009	0.64717	0.3994	0.56286	0.40979	0.46215	0.51754	0.50661	0.53904	0.54212	0.57736	0.48271	0.65745	0.61199	0.30536	0.66322	0.60421	0.56383	0.56865	0.06646	0.2559	0.68229	1.01276	-0.09537	0.92369	0.78539	0.37045	0.9396	0.20798	1.19566	1.01763	0.12705	0.46219	0.35349	0.44063	0.37372	0.43226	0.16385	0.63018	-0.50615	0.71498	1.32402	0.83535	0.89639	0.3011	0.60086	0.28143	0.27353	0.0837
YHR098C	2.18008	2.24239	2.07869	2.1689	2.07288	2.13987	2.41683	2.45391	2.28626	2.41876	2.33855	2.40532	2.79624	3.00796	2.78805	2.67867	2.87085	2.84025	2.60073	2.67778	2.38345	2.40646	2.55021	2.36743	2.56521	2.06371	2.37757	2.39298	2.17314	2.53607	2.51937	2.37044	2.17236	2.01803	2.64977	2.61801	2.3611	2.03537	2.55873	2.4464	2.37901	2.3472	2.22661	2.50791	2.0484	2.41994	2.34824	2.25806	2.15211
YLR173W	-0.46262	-0.25947	-0.69609	-0.24906	-0.24728	-0.32165	-0.62593	-0.7162	-1.15592	-0.96377	-0.49354	-0.58377	-0.67258	-0.28593	-0.50095	-0.1961	-0.35886	-0.7937	-0.06415	-0.66278	-0.65512	-0.59293	-0.2315	-0.9938	-0.2107	-0.22895	-0.73335	-0.80711	-0.88738	-0.77285	-0.6207	-0.09456	-0.13782	-0.31653	-0.86473	-0.94789	-0.43219	-0.91669	-0.51019	-0.76534	-0.4387	0.06977	-1.08781	-0.26221	-0.89173	-0.83245	0.22482	-0.24572	-0.629
YMR314W	2.75804	2.79572	2.65167	2.73868	2.99525	2.70682	2.99451	2.88904	2.66153	2.8926	2.73478	2.76564	3.11498	3.31772	3.48424	3.32025	3.36988	3.24185	2.91559	2.75454	3.19721	2.77075	2.71448	2.95743	2.53465	3.02438	2.77516	2.58187	2.98649	2.85682	2.45483	3.26745	2.85676	2.42046	3.10674	3.13045	2.94945	3.23622	2.83064	3.13518	2.47137	2.18246	2.8068	3.03799	2.85932	3.06955	3.21219	2.79428	3.22856
YOR244W	-0.15901	-0.31934	-0.06083	-0.37434	-0.61968	-0.19715	-0.45775	-0.40509	-0.26453	-0.5292	-0.48171	-0.51401	-0.07615	-0.33088	-0.10113	-0.29402	-0.38828	-0.24841	-0.66354	-0.07129	-0.25831	-0.58717	-0.90801	-0.28234	-0.5698	-0.61261	-0.63238	-0.47955	-0.22913	-0.37924	-0.41486	-0.77217	-0.42535	-0.72631	-0.60858	-0.39425	-0.39542	-0.0786	-0.79426	-0.20167	-0.49243	-0.82358	-0.52865	-0.85794	0.02796	-0.32536	-0.4564	-0.34527	-0.39938
YHR190W	2.57213	2.58082	2.53287	2.68161	2.54528	2.76445	3.43194	3.60116	3.17042	3.46169	3.3983	3.39726	3.90008	3.9133	3.97957	3.92751	4.26137	4.10698	2.79453	2.88613	3.31548	3.20292	2.67888	2.31788	2.81482	2.61773	3.28826	3.05493	2.95948	3.3485	2.77846	2.60326	2.7613	2.55497	2.70196	2.87036	2.88874	2.63933	2.8871	2.32586	2.84662	3.11894	3.33044	3.15652	3.34215	3.31003	2.57837	2.73189	2.78301
YPL097W	-0.58671	-0.44376	-0.48287	-0.61383	-0.33997	-0.50281	0.04493	0.24695	0.12477	0.06828	0.12573	-0.01533	0.5414	0.59413	0.58745	0.76195	0.86835	0.55658	-0.80325	-0.6902	-0.46981	-0.49168	-0.25325	-0.22405	-1.08213	-0.82718	-0.63238	-0.50623	-1.10351	-0.21336	-0.61011	-0.14629	-0.72258	-0.1622	-0.56358	-0.55349	-0.67854	-0.62585	-0.6089	-0.46822	-0.74343	-0.49764	-1.21666	-0.88271	-0.56757	0.12776	-0.31418	-0.34909	-0.56258
YLR103C	-1.97605	-1.98456	-1.98269	-1.79123	-2.02981	-1.82944	-2.00243	-1.68462	-1.90984	-1.72768	-1.97445	-1.6977	-1.63885	-1.27485	-1.41369	-1.5282	-1.76988	-1.74324	-2.16366	-1.62287	-2.00956	-1.98476	-2.42206	-1.79448	-2.22406	-2.27198	-2.37218	-2.23155	-1.52294	-1.76389	-2.31208	-1.40832	-2.06982	-1.24843	-2.07268	-1.55096	-2.32543	-1.56619	-2.10252	-1.67395	-1.95811	-2.20073	-2.148	-1.44969	-1.88482	-1.82838	-2.23845	-2.18563	-1.80999
YNL115C	0.66316	0.81006	0.59048	0.52668	0.66498	0.93115	1.24177	1.72428	1.12598	1.37192	1.30857	1.30786	0.89556	1.11655	1.0892	1.04587	1.20971	1.04358	1.01524	0.78968	1.66303	1.5715	1.3363	0.77155	1.52723	1.07353	1.50754	1.30201	0.33342	0.97169	1.33968	0.6867	1.20068	0.59683	0.53262	0.65275	1.05479	1.35425	0.82814	0.61618	1.26572	1.26954	1.03684	0.74459	0.9206	1.0142	1.46647	1.59177	1.05136
YBR112C	1.9191	1.72667	1.8981	1.65557	1.65277	1.93667	1.18442	1.1701	1.15967	1.15225	1.03118	1.17405	1.06628	1.0825	1.22417	0.96011	1.09263	1.09242	1.39646	1.46476	1.42965	1.37261	1.35955	1.46731	1.33324	1.503	1.31939	1.17613	1.96652	2.02337	0.76916	1.44742	1.61863	1.47251	1.65873	1.70305	1.41746	1.36436	1.45111	1.44804	1.0319	1.27429	1.95988	1.72685	1.41757	1.93203	1.55731	1.29245	1.7093
YLR123C	-2.14315	-1.49064	-2.05505	-2.11581	-2.06499	-1.79508	-2.55088	-2.06959	-2.4047	-2.68464	-2.5879	-2.11742	-2.74633	-2.41447	-2.77249	-2.27535	-2.50443	-2.81348	-1.62325	-2.11525	-1.61245	-1.66878	-1.41039	-2.18209	-1.88945	-1.19	-1.97811	-1.61918	-1.89226	-1.52694	-2.03671	-1.54706	-0.91367	-1.33632	-2.10306	-2.08837	-1.60282	-1.64548	-1.90479	-2.3818	-1.89176	-1.20337	-1.3016	-1.17479	-2.16938	-2.06568	-2.07176	-1.50946	-2.17163
YNL247W	1.06798	0.8607	1.17253	1.06381	0.99128	1.02548	1.04023	0.74392	1.02716	1.0369	1.02968	0.97442	1.37077	1.28598	1.45862	1.29708	1.60074	1.30642	0.83816	1.03011	0.6877	0.65264	0.84961	1.36837	0.79876	0.60415	0.64087	0.54236	1.18356	1.10738	0.62993	0.55615	0.10102	0.40611	0.84161	1.08189	1.05479	0.82081	0.89012	1.23621	1.26782	1.17299	1.06161	0.82967	0.86933	1.08448	1.21326	1.0074	1.0355
YOR345C	-3.0169	-3.31437	-3.2116	-3.31635	-3.68464	-3.21381	-2.48849	-2.48737	-2.48918	-2.35926	-2.99913	-2.02869	-0.3216	-0.26824	-0.28153	0.19924	-0.42227	-0.09798	-2.54766	-2.73992	-3.12849	-3.11782	-1.94723	-2.68368	-1.72449	-1.86969	-2.76533	-2.9028	-3.33624	-3.66942	-2.41705	-2.19908	-2.51438	-1.43873	-2.78838	-2.31197	-1.57007	-1.95281	-2.91136	-3.17457	-3.24423	-3.36932	-1.9095	-2.1127	-3.10402	-3.47921	-3.2769	-3.53211	-2.40592
YER014C-A	-4.54458	-4.39015	-4.79279	-4.4084	-4.31093	-4.41601	-4.86798	-4.77196	-3.93818	-4.83518	-4.50647	-4.43192	-4.47711	-4.33809	-4.55476	-3.8518	-5.20396	-4.25883	-4.38823	-3.85117	-4.42297	-3.90929	-3.8912	-3.85484	-4.01847	-3.70599	-3.88707	-3.42274	-3.94168	-3.75493	-4.19007	-4.0782	-4.19544	-3.92625	-3.88912	-3.64179	-3.83029	-4.37862	-4.10143	-3.73565	-4.55019	-4.00027	-4.24523	-4.17678	-4.18223	-4.15259	-4.10168	-3.77262	-3.96229
YNR065C	-0.10546	-0.49476	-0.06905	-0.37688	-0.12173	0.05596	-1.32649	-1.18847	-1.38169	-1.19893	-1.35885	-1.30096	-0.04618	0.06515	0.27028	-0.27659	0.18105	-0.07334	-0.64826	-0.46409	-0.97266	-1.07717	-0.85331	-0.59061	-1.01715	-1.11976	-0.98342	-1.2471	-1.1596	-0.64503	-1.37188	-1.23651	-1.01051	-1.09377	-0.2545	-0.2863	-1.20362	-1.16555	-0.82108	-0.98535	-0.91305	-0.89141	-1.31471	-1.34443	-0.72575	-0.30782	-1.52077	-0.78798	-0.78724
YKL132C	-0.96703	-0.77803	-0.96381	-0.74705	-0.60889	-1.02583	-2.92125	-2.72327	-2.51323	-2.73649	-2.87128	-2.68835	-2.92175	-2.89837	-3.17034	-2.53499	-3.16786	-2.91356	-0.97734	-1.26581	-1.69359	-1.56691	-2.25713	-1.9765	-2.02515	-1.86165	-1.76753	-1.97231	-1.32304	-1.50948	-2.41052	-1.80136	-1.19142	-2.45765	-1.08744	-1.09431	-1.10849	-1.1042	-1.08265	-1.43327	-1.82259	-1.09429	-1.05896	-1.37254	-1.59857	-1.54033	-2.28474	-2.61085	-1.26059
YKL012W	-0.31566	-0.42213	-0.159	-0.36703	-0.43507	-0.30532	-0.43786	-0.39405	-0.39422	-0.19353	-0.19836	-0.34728	-0.67756	-0.67045	-0.67069	-0.6656	-0.74253	-0.73412	-1.03257	-0.17033	-0.39952	-0.37975	-0.96247	-0.29351	-0.25153	-0.6043	-0.59611	-0.66668	-0.14619	-0.50567	-0.39401	-0.24151	-0.38066	-0.58263	-0.63744	-0.41426	-0.86872	-0.13521	-0.78073	-0.15268	-0.14124	-0.86566	-0.21716	-0.55682	-0.62017	-0.25083	-0.38541	-0.80606	-0.71759
YPL222W	0.53288	0.61039	0.57977	0.63496	0.63101	0.39931	0.7336	1.08994	0.80902	0.60325	0.64042	1.09103	0.43915	0.86353	0.73578	0.591	0.64873	0.78963	0.69776	0.56215	0.83695	0.54673	0.99197	-0.06622	0.62797	0.61067	0.92408	1.01399	0.57662	1.47548	0.39898	0.53189	1.23734	0.91608	0.70776	0.38296	0.64457	0.50157	0.67922	0.32986	0.61268	0.59211	0.56729	0.93229	0.55718	1.24498	1.35652	1.10195	1.22746
YLR395C	2.25392	2.23077	2.33208	2.28255	2.17646	2.51091	4.31589	4.30086	4.1684	4.20397	4.11545	4.13174	4.42214	4.54204	4.51572	4.48488	4.48895	4.42558	2.62898	2.78382	3.4652	3.64357	3.15883	3.28872	2.48983	2.69417	3.74539	3.50448	3.03722	3.67097	3.90416	2.62656	2.28853	2.00376	2.39314	2.38604	3.22604	2.74599	2.76775	2.69155	3.48325	3.69601	3.43137	2.57739	3.37887	3.48664	3.19918	3.2787	3.29392
YHR141C	4.21776	3.70423	4.14188	4.04468	4.24781	3.84159	5.26517	4.43324	5.14351	5.02399	5.07043	4.83879	5.57166	5.07691	5.44917	5.26469	5.37109	5.34981	4.58111	4.06089	4.43082	4.12812	4.26457	4.69579	4.57803	4.31583	4.69596	4.15339	4.44427	4.57181	5.54346	4.69396	4.10493	4.10486	4.87701	4.39729	4.66652	3.98808	4.54358	4.58082	4.99523	4.80358	4.69019	4.22372	4.86604	4.44487	4.71984	4.40859	4.67518
YAL041W	0.85741	0.49243	0.79707	0.67718	0.75139	0.85372	0.57318	0.46812	0.25114	0.42891	0.40836	0.44597	0.58238	0.68114	0.83997	0.72985	0.74404	0.92022	1.07842	0.69392	0.86431	0.83578	0.54625	0.63569	0.7705	0.87818	0.60291	0.48711	0.90254	0.67129	0.39105	0.32224	0.54178	0.82254	0.77713	0.89577	1.00686	0.7495	0.86918	0.63129	0.56432	0.64902	0.82565	0.46651	0.88327	0.65771	0.61792	0.50347	0.6973
YBL052C	-1.19908	-1.18997	-1.10306	-1.23623	-1.03261	-1.0403	-1.47456	-1.38189	-1.20528	-1.27449	-1.40249	-1.33136	-1.24261	-1.44162	-1.45448	-1.20006	-1.31291	-1.40121	-1.6687	-0.90156	-1.42701	-1.00414	-1.7576	-0.94406	-1.16414	-1.13989	-1.66121	-1.71292	-1.38654	-1.08581	-1.56978	-1.56887	-1.28072	-1.52954	-1.58963	-1.14123	-1.51577	-0.97942	-1.03986	-0.74127	-1.23645	-1.51968	-1.47366	-1.20697	-1.54755	-1.07425	-1.84479	-1.60901	-1.475
YCL045C	1.85788	2.01339	1.80923	1.86816	1.83908	2.1535	2.21418	2.07453	1.98606	2.14024	2.12625	1.96144	2.50164	2.49051	2.59318	2.58247	2.66318	2.4111	1.82852	1.88124	2.08865	2.45111	2.43157	2.00957	2.42058	2.21219	1.85601	2.08359	1.68792	1.99645	2.04128	1.81522	1.70753	1.38429	1.44751	1.82762	2.43399	2.14266	2.35391	2.14735	2.51743	2.44116	1.92093	1.80421	2.09417	1.92104	2.24231	2.1235	1.85079
YDL135C	1.25956	1.08333	1.39754	1.41637	1.21643	1.15453	1.31193	1.33436	1.28081	1.22839	1.74397	1.15545	1.2742	1.16369	1.48286	0.8404	1.43152	1.27535	1.34837	1.46205	1.88511	1.28032	0.60582	1.66202	1.18785	1.1477	1.2996	1.47326	1.67583	1.19368	1.65759	0.182	1.28423	-1.06022	1.0602	1.37894	1.26104	1.62581	1.05731	1.85756	1.64967	0.77624	1.19466	0.4947	1.82937	1.21498	1.18358	0.99994	1.85223
YNL011C	0.2749	0.56753	0.32157	0.6	0.46054	0.44519	0.35516	0.52098	0.24298	0.55702	0.40203	0.36748	0.2777	0.45394	0.5873	0.6071	0.46719	0.39199	0.04618	0.22902	0.13262	0.50469	0.3927	-0.09451	0.42822	0.54941	0.20836	0.41868	-0.06623	-0.30583	0.22029	-0.03692	0.55336	0.1218	0.42291	0.32922	0.43041	0.18447	0.34658	-0.2762	0.38077	0.40797	0.06495	-0.34959	0.69472	0.1624	0.34682	0.74584	0.39895
YMR237W	1.61708	1.71744	1.77515	1.73669	1.81304	2.01074	1.61611	1.78034	1.40976	1.74027	1.52633	1.73825	1.57043	1.80931	1.87517	1.54097	1.99004	1.80465	1.70837	1.91034	1.68543	1.59672	1.41455	1.61626	1.58871	1.52828	1.47232	1.41115	1.48316	1.46988	1.519	1.46278	1.82634	1.18093	2.00966	2.00553	1.90263	1.8177	1.57417	1.79454	1.84324	1.62669	1.40985	1.49987	1.83659	1.75395	1.94395	1.67881	1.63564
Q0032	-4.68947	-5.06105	-4.4749	-4.54578	-5.12404	-4.4023	-4.75665	-4.6688	-4.89514	-5.04544	-4.80646	-5.28603	-4.47556	-4.81702	-4.28282	-4.82909	-4.50834	-4.46597	-3.89699	-3.53581	-3.8781	-3.98332	-4.06395	-4.32269	-3.71889	-4.04337	-4.17854	-4.08932	-4.16333	-4.02568	-3.82365	-4.55081	-4.07199	-3.89799	-4.19444	-4.01067	-4.04459	-4.63408	-4.56364	-3.79474	-3.58244	-4.42709	-4.10548	-3.35587	-3.33353	-3.74924	-2.97859	-3.69421	-3.80027
YOR020W-A	1.37974	1.05016	1.37015	1.29036	1.47257	1.02742	2.04633	2.57469	2.49641	2.37388	2.40863	2.32075	2.14486	2.72219	2.77429	2.18935	2.62966	2.78658	2.5471	2.33408	2.0849	1.67812	2.22966	2.84017	1.31349	2.18535	2.78372	2.77707	2.33952	0.85621	2.48114	2.50412	1.53332	1.88877	2.37101	2.47001	2.62952	2.87146	2.18018	2.7079	1.62802	1.28186	2.04282	2.2205	3.00507	1.20569	1.30614	1.78434	1.85519
YOR054C	1.52104	1.34008	1.5186	1.27486	1.3278	1.32708	0.83998	0.93978	1.04673	0.93792	0.81535	1.08781	0.37977	0.39152	0.52961	0.22485	0.57987	0.2975	0.41249	0.92965	1.03001	1.01607	0.64057	0.48255	0.84094	1.10986	1.21597	0.96152	1.47695	1.00959	0.39454	0.90159	0.95195	0.91525	1.27908	1.25703	0.76028	1.4968	0.90215	0.91126	0.92509	0.76691	1.47021	1.10488	1.16111	1.19471	1.27076	0.8823	1.28057
Q0070	2.37505	1.4803	2.47016	2.71737	2.06781	2.72279	-2.94287	-2.51095	-3.08477	-3.09946	-3.41701	-3.04335	3.33562	2.46989	3.88226	2.32539	2.43483	2.66448	0.11663	2.72722	1.32917	1.35376	1.49926	1.84973	1.29392	2.54996	0.78252	1.8216	1.2134	1.771	1.57385	0.61525	-1.38306	-0.23009	-0.17808	2.0286	0.15363	0.41431	1.22626	2.52718	2.28103	1.36948	1.47227	0.46316	2.16589	2.67814	-0.03062	2.31544	1.27194
YGR214W	3.26808	2.81335	3.6541	3.14167	3.42075	3.1019	4.97698	3.91882	4.69127	4.53101	4.77275	4.4713	5.30857	4.83009	5.33102	4.93459	5.13814	5.06003	4.11395	3.47579	3.72433	3.67483	3.98006	4.12176	4.01633	3.7517	4.08977	3.65023	3.97137	4.18128	4.73829	3.58564	3.87888	3.23655	4.08684	4.07934	4.06766	3.4784	4.21019	4.14122	4.3597	4.30947	4.18339	4.32591	3.77471	3.90958	4.28517	4.06485	3.85167
YIR021W-A	-3.91737	-4.20399	-4.07788	-3.57829	-4.16612	-3.60292	-4.27369	-3.8564	-3.62058	-4.18194	-3.818	-4.22593	-3.17722	-4.09629	-3.33203	-5.19968	-2.70187	-2.5018	-3.7463	-3.48271	-3.61717	-3.44882	-3.31556	-3.25209	-3.31902	-4.00542	-3.27509	-3.35723	-3.64069	-3.57603	-3.03164	-3.92938	-3.19476	-4.51401	-3.56982	-3.16673	-3.64603	-3.28414	-3.69321	-3.38045	-3.30113	-2.81524	-3.43022	-3.65257	-3.39088	-3.46477	-2.30722	-3.31651	-3.47496
YGR046W	-0.18977	-0.022	-0.18136	-0.18111	0.21999	0.08785	0.15049	0.22472	-0.02081	0.14775	0.05689	-0.01334	-0.36484	0.05726	-0.00459	-0.10292	0.19927	-0.15436	0.07651	0.0004	-0.22642	0.02559	0.02268	-0.02809	0.01698	-0.18285	-0.15754	-0.24482	-0.49666	-0.29604	-0.13243	-0.51917	-0.38737	-0.62367	-0.11996	-0.01609	-0.141	-0.10929	0.03253	-0.04603	-0.08379	-0.29127	-0.28312	-0.40411	0.03952	-0.30897	-0.122	0.24528	-0.47702
YGR224W	-4.66828	-4.72831	-4.64553	-4.70384	-4.77101	-4.66021	-4.78192	-4.84159	-4.73049	-4.53586	-4.74482	-4.95475	-4.56545	-4.80948	-4.59423	-4.70324	-4.64986	-4.66485	-4.05437	-3.91429	-4.09212	-4.2129	-4.09885	-4.05566	-4.11999	-4.12722	-4.30422	-4.1937	-3.8702	-3.79558	-3.97822	-4.12577	-4.13065	-4.15304	-4.16796	-3.97243	-3.90498	-4.07056	-3.90033	-4.01362	-4.00048	-4.00511	-4.06493	-4.14502	-3.99509	-3.97544	-3.87172	-4.09768	-4.15615
YDR308C	0.22475	0.17895	0.39254	0.298	0.27531	0.14109	-0.18454	-0.14547	-0.01203	-0.09074	0.01946	-0.0586	0.21437	0.09335	0.25768	0.28091	0.25626	0.38093	-0.12849	0.29393	0.02242	-0.0256	-0.56184	0.37024	-0.04475	0.0423	-0.14979	0.27651	0.49075	0.04473	0.06532	0.27145	0.35502	0.47695	-0.09539	0.03327	-0.00045	0.20515	-0.51642	0.33113	-0.15841	-0.3389	-0.07488	0.08462	0.26784	-0.00733	0.29079	0.18667	0.22696
YMR130W	-0.0603	0.16251	0.10065	0.2851	0.09271	0.19193	-0.11086	-0.00295	0.00709	0.05472	-0.01712	-0.10544	0.30386	0.4706	0.47178	0.34477	0.41967	0.04887	-0.04306	-0.30404	-0.37904	-0.38855	-0.08867	-0.03324	-0.43136	-0.38512	-0.28841	-0.04897	-0.20847	-0.19008	0.02146	0.30916	-0.25376	0.17378	-0.30748	-0.21752	0.07421	-0.36735	0.08598	-0.19984	-0.11213	-0.19325	-0.52699	-0.20745	-0.12011	-0.23522	-0.18887	0.00571	-0.24094
YLR455W	0.21714	-0.20309	0.54172	0.02151	0.11546	0.34727	-0.19448	-0.25981	0.12074	-0.18979	0.17599	-0.50997	0.21576	-0.22349	-0.19804	-0.33347	-0.21491	-0.38786	0.48949	0.89213	0.15466	0.37581	0.38013	0.4954	0.22083	0.38111	-0.15273	0.07414	0.26426	0.20678	0.14652	-0.10164	-0.37938	-0.17816	0.69261	0.32541	0.26772	0.36643	0.15529	0.33967	-0.12743	0.1242	-0.22558	-0.34609	0.32996	0.03654	-0.1206	0.59354	0.12248
YGL259W	0.409	0.5459	0.08812	0.86407	0.41359	0.90273	-0.40881	-0.35211	-0.43477	-0.36967	-0.64418	-0.62354	-1.26882	-0.8012	-1.30226	-0.84214	-1.32625	-1.10548	0.63737	0.51365	-1.34279	-0.91333	-0.04497	-1.87713	-0.64308	-0.67563	-0.88948	-0.23721	0.16575	0.96433	1.9127	0.78423	-1.09752	-0.92714	-0.26382	-0.85056	-2.01211	-2.0857	0.41282	-1.11553	0.63187	1.09254	0.99472	0.42295	0.06502	0.62099	0.95272	1.63545	-0.68054
YJL153C	-1.68588	-1.08638	-1.47613	-0.89639	-1.4785	-1.50314	-0.59801	-0.5809	-0.70932	-0.45205	-0.82965	-0.4006	-0.01467	0.17579	0.36639	0.11784	0.34853	0.53528	-0.52897	-1.3652	-1.461	-1.38734	-0.03445	-0.88796	-1.0955	-1.36779	-0.17788	-0.93405	-1.07242	-1.12565	-0.71114	-0.84588	-0.75461	-1.05872	-0.55189	-1.39946	-1.02232	-1.21294	-0.47201	-0.54103	-0.89005	-0.52324	-0.91306	-0.86717	-1.56445	-1.32262	-0.86588	-0.70627	-0.31579
YIR030W-A	-4.50898	-4.45489	-4.35472	-4.78048	-4.98007	-3.34908	-5.0414	-4.64948	-5.34447	-4.93314	-4.79407	-5.05515	-4.23565	-4.65915	-3.34518	-4.42026	-2.88787	-4.26178	-3.70866	-3.61383	-4.87735	-4.00352	-4.03659	-4.51392	-4.02006	-4.11559	-3.82664	-4.06889	-3.96445	-3.36676	-4.0439	-4.01536	-3.84015	-3.41012	-4.34879	-4.27802	-4.4385	-3.87582	-4.23059	-4.25682	-3.75148	-4.03187	-3.91068	-3.36408	-4.05099	-3.94573	-3.48147	-3.64091	-4.24122
YKR036C	-1.20429	-1.12524	-1.4396	-1.2393	-1.24545	-1.02172	-1.71617	-1.61009	-1.45772	-1.7583	-1.69838	-1.49606	-1.63782	-1.31669	-1.66443	-1.24596	-1.71228	-1.98597	-1.46599	-1.1038	-1.12673	-1.11897	-1.36054	-0.92397	-1.43108	-1.47069	-1.59547	-1.69465	-1.44713	-1.67825	-1.69417	-1.59807	-1.46738	-1.19736	-1.3641	-1.33848	-1.36529	-1.06334	-1.59962	-0.99399	-1.55413	-1.36539	-1.62962	-1.52005	-1.71321	-1.44663	-1.55097	-1.52425	-1.3967
YDR320C	0.92252	0.99087	0.72043	0.50184	0.65631	0.82896	0.64733	0.72783	0.66	0.68464	0.6174	0.67523	0.95717	0.97553	0.95921	0.5832	0.91162	1.0366	1.12169	1.38022	1.04092	0.85722	0.53818	0.71803	0.4347	0.54096	0.79059	0.8128	1.24418	1.01358	0.41707	0.63636	0.76152	0.13027	1.19679	0.88611	0.63062	0.62437	0.60333	0.63756	0.56954	0.54187	0.84166	0.59057	0.80377	0.92062	0.84929	1.21305	1.05948
YBR035C	2.19379	2.10766	2.12893	2.15547	2.03927	2.34608	2.4784	2.2885	2.39311	2.37203	2.40401	2.20817	2.14797	1.96251	2.2805	2.03444	2.18088	1.95244	2.02816	2.13092	2.38032	2.21168	1.86015	2.22836	1.98813	1.92966	2.11659	2.41465	1.97916	1.63792	2.04008	1.83799	2.06685	1.28698	2.02366	2.06119	2.23514	2.2093	1.85844	2.14182	2.3592	2.00838	1.9994	1.64675	2.49294	2.165	2.59771	2.69274	2.39018
YCR002C	1.89775	1.85937	1.83309	2.07216	1.82076	1.90118	1.94657	1.83772	1.82086	1.73475	1.69869	1.69012	1.67398	1.80287	1.97412	1.84295	2.10431	1.52868	1.59805	1.9247	1.87826	1.94279	1.46452	1.22838	1.61761	1.94432	1.68257	1.82688	1.97085	1.83074	1.77305	1.47219	1.28536	0.6629	1.83043	1.89825	1.82969	2.23326	1.75439	1.72237	1.99938	1.87754	1.80442	1.6522	1.89048	2.0147	2.03044	1.67085	1.66423
YIL047C-A	1.65063	1.49768	1.47248	1.52291	1.35779	1.30043	1.02384	0.85877	1.20052	0.96385	1.1474	1.0926	0.91707	0.58155	0.33197	0.83674	0.62446	0.3791	2.0522	1.62279	0.88728	1.25077	1.36397	1.19646	2.10501	2.1641	1.67491	1.75906	2.20232	1.48603	1.55612	1.32346	1.41237	1.85357	1.56395	1.43764	1.84363	1.81474	1.65333	1.30972	1.35331	1.98135	2.26562	2.3197	1.5714	1.22956	1.53821	0.73147	1.55196
YAL016W	2.07233	2.19637	1.99793	2.29328	2.22381	2.30919	2.43163	2.60409	2.38646	2.47598	2.28847	2.41566	2.21952	2.67669	2.64156	2.40153	2.96486	2.65678	2.07309	2.17992	2.35366	2.26914	1.88143	1.6429	2.22119	2.06498	2.10718	1.97078	1.81365	2.22678	2.18898	2.38467	1.73784	1.74427	2.12514	2.11975	2.56387	2.29551	1.97923	1.80464	2.25537	2.17755	1.95676	1.9153	2.57318	2.4203	2.50351	2.37408	2.05345
YDR244W	-0.51834	-0.56709	-0.68449	-0.83265	-0.30813	-0.6047	-0.6436	-0.25741	-0.33901	-0.32853	-0.4781	-0.43878	-0.77949	-0.60406	-0.74426	-0.66804	-0.86292	-0.75656	-1.08229	-0.88265	-0.46104	-0.67268	-1.23296	-0.74113	-0.72295	-0.87082	-0.3581	-0.84673	-0.8616	-0.9434	-0.53631	-0.4759	-0.4448	-0.49754	-0.86156	-0.79287	-0.8171	-0.05006	-0.86092	-0.52692	-0.5607	-0.99874	-0.5958	-0.72874	-0.73313	-0.73881	-0.7157	-1.00948	-0.77455
YER097W	-1.41013	-1.24049	-0.93812	-0.92115	-0.95561	-1.42239	-1.54712	-1.39723	-1.14876	-1.29411	-1.44798	-1.05215	-1.93694	-1.86556	-1.21226	-0.29734	-1.99318	-1.21698	-0.52923	-1.0586	-0.34932	0.18118	0.65268	-0.47163	0.29938	0.48718	-0.50139	-1.08629	2.37664	-1.28818	-1.15834	-1.50473	-0.80219	-0.34939	-0.18679	-0.44922	-0.15954	-0.11073	0.36677	-0.23499	-1.66783	-1.34352	-1.14859	-1.10448	0.17063	-1.52576	-0.12078	-1.33891	-0.92539
Q0275	2.68757	2.62633	2.47478	3.0719	2.83387	2.91577	3.27964	3.49919	3.67516	3.31576	2.98211	2.69465	3.61058	4.34753	4.43317	3.75014	4.61515	3.71987	0.8047	2.84814	1.53862	1.18144	1.84128	2.06815	1.3567	0.91052	1.84175	2.53925	1.27498	1.78781	2.76866	1.29013	0.50816	0.2416	0.99827	2.06832	1.33947	1.56565	1.58176	2.46575	2.44434	2.04721	1.28049	0.91732	1.91299	2.46915	1.94569	2.99975	1.9558
YMR239C	-2.53573	-2.26774	-2.11103	-2.17067	-2.1276	-2.12579	-2.41866	-2.47504	-2.27765	-2.29631	-2.09942	-1.88945	-1.99888	-2.39142	-2.17016	-1.8164	-2.31515	-2.36795	-2.20082	-1.84337	-2.25975	-2.77745	-2.5967	-1.43565	-2.4415	-2.69275	-2.25237	-2.6099	-2.37775	-1.84734	-2.38586	-1.34235	-1.96799	-1.14518	-2.17671	-1.74267	-2.30629	-1.92591	-2.33199	-1.43141	-1.86403	-2.50782	-2.1861	-1.96968	-2.13262	-2.00084	-2.00067	-2.56849	-1.60712
YPR093C	-1.29113	-0.92564	-1.18855	-1.37834	-1.24789	-1.23253	-1.54411	-1.37905	-1.41887	-1.43643	-1.34715	-1.25465	-1.3963	-1.49087	-1.55931	-0.92178	-1.55446	-1.28338	-1.04314	-1.18433	-0.73401	-0.95295	-1.0017	-1.22525	-1.4294	-1.12453	-0.93307	-1.33245	-1.20844	-1.14282	-1.2354	-0.43103	-0.54983	0.08289	-1.08406	-1.31182	-1.29437	-1.23454	-0.97259	-1.24603	-1.44098	-1.35053	-1.61211	-0.32277	-1.49774	-1.15893	-1.14422	-1.52789	-1.19714
YLR163C	0.62058	0.62614	0.91688	0.65501	0.54866	0.83221	1.3172	1.19574	1.25674	1.31457	1.11146	1.01689	1.21165	1.17359	1.54604	1.34383	1.73562	1.2434	0.80091	0.81553	0.94749	0.95721	0.70411	1.22281	0.2041	0.42792	0.43256	0.55632	0.66503	0.8168	0.69506	0.69282	0.58385	0.20582	0.83993	0.90766	0.50156	0.78214	0.56984	0.75842	0.71409	0.60333	0.64043	0.28612	0.94224	0.6032	1.02545	1.74341	0.94138
YDL072C	3.25712	3.32841	3.26872	3.19959	2.95791	3.47891	3.96051	4.10242	3.63177	4.10213	4.01967	3.61517	4.34997	4.3847	4.45459	4.62789	4.75611	4.68383	3.27818	3.07583	3.74403	4.16819	3.96797	2.86674	3.85506	3.84097	3.83833	4.09952	3.10706	3.54841	4.01008	2.87693	3.24341	2.19509	3.46066	3.32217	3.81209	3.59041	3.76958	2.90223	3.81241	4.25091	3.37231	3.27354	3.3059	3.81108	4.17296	4.13855	3.49675
YPL190C	1.74033	1.87941	1.94769	1.70397	1.75505	1.74851	1.79547	1.84813	1.68802	1.63731	1.85409	1.88465	2.0561	1.761	2.08582	1.80805	1.95593	2.1895	1.4026	1.5172	1.26858	1.37725	1.75512	1.7222	1.73499	1.95958	1.69269	1.62239	1.51367	2.34402	1.15394	1.48824	1.7018	1.97238	1.85587	1.96421	1.73601	1.50278	1.81629	1.94731	1.67137	1.78961	1.8168	1.81624	1.65302	2.29389	1.50993	1.56088	1.76368
YHR199C-A	0.1023	-0.17803	0.19495	-0.03199	-0.19199	-0.32947	-0.0586	-0.17508	-0.29865	-0.51427	-0.22866	-0.24729	-0.38553	-0.46832	-0.55545	-0.44536	-0.67148	-0.48698	0.26864	0.14979	0.31719	0.03189	-0.0101	-0.0787	-0.40552	0.21501	-0.01737	-0.12304	-0.01985	0.08663	0.06032	-0.016	0.23989	0.02691	0.74031	0.28534	0.41783	0.07289	0.32236	0.06247	0.06414	0.66562	0.1119	0.57622	-0.4377	-0.03186	0.47647	0.03817	0.29948
YBR207W	1.88334	2.10179	1.79886	2.01227	1.85235	1.78031	1.79048	2.10576	1.93144	1.86317	1.87353	2.00682	2.35374	2.463	2.29017	1.81009	2.64835	2.6355	1.64793	1.49959	1.50549	2.06757	2.19976	1.29257	1.96257	2.45654	1.8854	1.87152	1.62575	2.11519	1.46947	1.62686	2.00653	1.94873	1.95641	1.6119	1.71038	1.5414	2.00787	1.20885	1.33341	2.22417	2.14495	2.38178	1.27543	1.99031	2.08787	1.8098	1.38636
YER059W	0.79961	0.36737	0.69469	0.38747	0.65202	0.82236	0.40383	0.57181	0.60343	0.48873	0.61584	0.49069	0.74644	0.55608	0.54341	0.18957	0.44449	0.32611	0.0502	0.68335	0.50503	0.57978	0.28297	0.39366	0.47057	0.90611	0.1545	0.50168	1.10004	0.25274	0.17619	0.27863	0.66771	0.47194	0.10961	0.40798	0.50285	0.98663	0.17461	0.54128	0.58256	0.3172	0.49961	0.39871	1.04568	0.67788	0.67843	0.75595	0.50149
YIL049W	0.52656	0.41902	0.38167	0.46968	-0.40304	0.35657	0.75071	0.61518	0.39635	0.81308	0.30605	0.10806	0.82612	0.60884	0.58664	0.97397	0.45151	0.89863	0.46309	0.1753	0.43307	0.90923	1.64133	0.3685	1.12969	1.10026	0.1396	0.97938	-0.2754	0.75601	0.57925	0.39588	0.39055	0.69192	-0.33545	0.37025	0.87649	0.62658	1.23421	0.1275	1.07907	0.87066	0.46152	0.52576	0.91188	-0.29187	0.39909	0.77063	0.51815
YBR069C	0.95245	0.73152	0.80129	0.89999	1.03341	0.983	-0.04441	-0.14396	0.07751	-0.04183	-0.00462	-0.10297	0.85914	0.64442	0.3891	0.55015	0.54003	0.45539	1.52626	0.94846	1.34845	1.29938	1.22593	1.30312	0.96665	0.67239	1.73618	1.61959	0.67245	0.42501	0.348	0.83397	0.88946	1.53704	0.84285	1.0834	1.6973	1.285	1.1471	1.18939	0.83299	0.94115	0.61513	1.04889	0.53881	0.18312	1.18754	0.19575	0.69758
YML073C	3.98604	3.6919	4.0523	3.84293	4.27987	3.69524	5.14659	4.32853	4.86178	4.63822	5.09824	4.91096	5.45082	5.27714	5.46194	5.20718	5.35482	5.3417	4.677	4.12313	4.41487	4.22096	4.6496	4.71493	4.43076	4.11151	4.47577	4.11057	4.35942	4.23902	5.24176	5.13108	4.26255	5.12681	4.67707	4.53065	4.45608	4.06112	4.54732	4.70669	4.87319	4.68941	4.61075	4.70283	4.63403	4.24369	5.28499	4.35387	4.67454
YGL215W	2.26341	2.03255	1.96048	1.87168	1.80159	2.16199	2.12527	1.62584	2.11594	1.95503	1.89628	1.66058	2.42318	2.07705	2.15711	2.2406	2.22828	2.20237	2.67132	2.84863	1.93893	1.78954	2.40929	2.47436	2.4495	2.14967	1.58327	1.51958	2.5008	2.04687	2.08083	1.50056	2.1017	1.87319	2.39851	2.28406	2.2343	1.937	2.59186	2.5184	2.14049	2.17827	1.91838	1.76858	2.43465	2.02025	2.20417	1.9682	2.18636
YLR084C	-0.06626	-0.04466	-0.17483	0.13707	-0.19048	-0.08907	-0.03309	-0.17566	-0.21869	-0.1656	-0.19408	-0.00089	0.28298	0.28858	0.25653	0.47273	0.26779	0.23433	0.45512	0.27548	0.00047	0.10098	0.78623	0.73078	0.30333	-0.03772	-0.16741	-0.16277	0.25687	0.11686	-0.01548	0.33121	0.13514	0.32877	0.01735	0.10706	0.37662	0.01727	1.26778	1.12324	-0.21503	0.09435	0.05749	0.32936	-0.50587	-0.10754	-0.26369	-0.48028	-0.46112
YPR066W	-1.1399	-0.83034	-0.81954	-0.71849	-0.96353	-0.84617	-0.75236	-0.40184	-0.9134	-0.83005	-0.80295	-0.58358	-1.39023	-1.09835	-1.50563	-0.86992	-1.36617	-1.57119	-0.42227	-0.9756	-0.67624	-0.54738	-0.50376	-0.85787	-0.81395	-0.6382	-0.66928	-0.83401	-0.30339	-1.36772	-0.51518	-0.28345	-0.23694	0.30084	-0.29941	-0.84563	-0.35672	-0.50918	-0.77069	-1.05391	-0.71932	-0.27268	-0.91328	-0.13492	-0.92985	-1.1571	-0.34982	-0.64141	-0.91041
YNL202W	-1.75318	-1.47411	-2.05703	-1.83151	-1.6418	-1.86641	-2.86502	-2.48524	-2.87321	-3.01668	-3.15765	-2.52791	-3.95132	-3.61929	-3.80917	-3.83619	-4.10438	-3.67335	-0.83541	-1.51066	-0.73466	-1.32405	-2.03745	-2.25129	-1.74472	-1.81257	-1.52327	-1.45773	-2.35409	-1.75415	-2.62747	-2.33553	-2.49696	-3.32242	-3.00702	-2.75758	-0.04878	-0.69252	-2.94803	-2.53097	-2.193	-2.43095	-2.03217	-1.86846	-0.91362	-2.15822	-0.64741	-0.3316	-1.63333
YOR135C	-4.25611	-5.44471	-4.82908	-4.37761	-5.01787	-4.83837	-4.74422	-4.33488	-4.43409	-5.09894	-5.15688	-5.08898	-4.67207	-4.58048	-4.57942	-5.00185	-4.46493	-5.17876	-4.40328	-4.46642	-4.0801	-4.08119	-4.17342	-4.23489	-3.91419	-4.02428	-4.52507	-3.90131	-3.41817	-4.17349	-3.61012	-4.5332	-4.0625	-4.35862	-3.4526	-4.25426	-4.05175	-4.32229	-4.25324	-4.09585	-4.11125	-3.87838	-4.03486	-3.99365	-4.11562	-4.63516	-3.87824	-3.82395	-3.62692
YPL143W	4.19921	3.67377	4.37246	3.93562	4.36895	4.00898	5.45109	4.76299	5.55735	5.13389	5.35247	5.02262	5.64524	5.25655	5.74654	5.37151	5.42971	5.50874	4.7892	3.94064	4.45619	4.32541	4.81434	4.67087	4.63004	4.34579	5.26823	4.37313	4.63961	4.84466	5.84971	4.05374	4.14187	3.20755	4.94167	4.48719	4.86785	4.38644	4.84043	4.6652	5.20181	4.91833	5.09849	4.00684	4.93416	4.69852	5.16518	4.65675	5.04097
[truncated: 5,590 more rows]
[truncated: 147 more columns]
