# Supplementary material for: Genetic Architecture of Ethanol-Responsive Transcriptome Variation in Saccharomyces cerevisiae Strains
Source: Oxford University Press journal article supplement (doi:10.1534/genetics.114.167429), 2014-06-26
Supplement: genetics.114.167429-8.xls [file genetics.114.167429-8.xls]

## Sheet: EtOH Response
YORF	DBY_1	DBY_2	DBY_3	DBY_4	DBY_5	DBY_6	M22_1	M22_2	M22_3	M22_4	M22_5	M22_6	YPS_1	YPS_2	YPS_3	YPS_4	YPS_5	YPS_6	MS_1.3_1	MS_1.3_2	MS_2.1_1	MS_2.1_2	MS_3.2_1	MS_3.2_2	MS_4.3_1	MS_4.3_2	MS_5.4_1	MS_5.4_2	MS_6.4_1	MS_6.4_2	MS_7.4_1	MS_7.4_2	MS_8.2_1	MS_8.2_2	MS_9.3_1	MS_9.3_2	MS_10.2_1	MS_10.2_2	MS_11.2_1	MS_11.2_2	MS_12.4_1	MS_12.4_2	MS_13.1_1	MS_13.1_2	MS_14.2_1	MS_14.2_2	MS_15.3_1	MS_15.3_2	MS_16.2_1
YHR055C	2.24284	2.26499	2.71486	2.59498	2.08207	1.89831	0.59462	0.753785	1.65543	0.962545	0.8702	0.993695	-0.231035	0.038255	-0.246375	0.983525	-0.0399	0.14843	2.42908	2.63453	0.30319	0.200555	1.26902	1.37772	1.5067	3.26762	1.59964	2.65806	2.23197	1.86709	3.63813	1.9727	1.14784	1.48201	2.00702	1.83399	1.03907	0.978885	0.87029	1.19247	1.51025	1.2993	2.27364	1.24463	2.11204	1.81926	1.48512	2.22023	1.05564
YPR161C	-0.21772	-0.6235	-0.53817	-0.75061	-0.39109	-0.39853	-0.38711	-0.502605	-0.376305	-0.278355	-0.41971	-0.457575	0.026965	-0.199165	-0.092415	-0.179655	-0.13016	-0.14905	-0.4905	-0.55232	-0.31649	-0.403265	-0.37303	-0.028875	-0.73242	-0.646085	-0.83094	-0.990035	-0.477115	-0.459975	-0.498725	-0.315745	-0.32815	-0.3417	-0.65737	-0.69827	-0.34885	-0.206905	-0.31958	-0.099795	-0.738685	-0.86983	-0.64061	-0.46152	-0.2716	-0.428825	-0.68458	-0.63897	-0.416125
YOL138C	-0.5445	-0.44353	-0.5751	-0.52	-0.29786	-0.2002	-0.4309	-0.371155	-0.191045	-0.148395	-0.49356	-0.323795	-0.302915	-0.202885	-0.252335	-0.196615	-0.32125	-0.27769	-0.25325	-0.25336	-0.14889	-0.007035	-0.25869	-0.041625	-0.42665	-0.264075	-0.50304	-0.700085	-0.654845	-0.506465	-0.202315	-0.316525	-0.24874	-0.04705	-0.65675	-0.28297	-0.29074	-0.119255	-0.20672	-0.060945	-0.530155	-0.23975	-0.71072	-0.20533	-0.50057	-0.314475	-0.52733	-0.22195	-0.349985
YDR395W	-1.55222	-1.73737	-1.58688	-1.46466	-1.58911	-1.62613	-1.42365	-1.31435	-1.60767	-1.73569	-1.6918	-1.32868	-1.12631	-1.07943	-1.23229	-1.04299	-1.11869	-1.25011	-1.50862	-1.7576	-1.75002	-1.59413	-1.49077	-1.22264	-1.42706	-1.63236	-1.71791	-1.94775	-1.63189	-1.36186	-1.77083	-1.76141	-1.61713	-1.13438	-1.71789	-1.65982	-1.24297	-1.30879	-1.51981	-1.71521	-1.22493	-1.34445	-1.53747	-1.40166	-1.82235	-1.66948	-1.45194	-1.76151	-1.64068
YGR129W	-2.06677	-1.49598	-1.79638	-1.69793	-1.75084	-1.65487	-1.27502	-1.10113	-0.685705	-0.951265	-0.51531	-1.16223	-1.32665	-1.24432	-1.42315	-1.52209	-1.72711	-1.82138	-2.06008	-1.84341	-0.50888	-1.32194	-1.52925	-1.35593	-1.20778	-1.47422	-0.83143	-1.15071	-2.00877	-1.05448	-0.658345	-0.809545	-1.05553	-1.21074	-1.90045	-1.54533	-1.24964	-1.19853	-1.6095	-1.15417	-1.05218	-1.25298	-2.01754	-1.18255	-1.16449	-0.925895	-1.79523	-1.58204	-1.05476
YPR165W	0.30204	0.28007	0.34151	0.31958	0.34347	0.37119	0.41875	0.520465	0.043005	0.477425	0.31618	0.444695	0.341305	0.366685	0.342925	0.361235	0.15829	0.26933	0.24149	0.14976	0.00267	-0.167335	0.06864	0.069595	0.05478	-0.154085	0.21565	-0.259365	0.221765	0.160375	0.258335	0.397435	0.35079	-0.187	0.25684	0.08884	0.27191	0.016235	-0.17825	0.045025	0.306075	0.25647	0.32577	-0.14508	0.24408	0.108185	-0.27367	-0.07352	0.024295
YAL069W	0.63541	0.67651	0.66833	0.38785	-0.43318	0.84787	0.36236	0.113915	0.197185	0.829315	0.44614	0.085185	0.987035	0.753795	0.851385	0.577555	0.0722	0.46528	0.85339	0.24731	1.15421	0.040115	0.44768	0.471925	0.07755	0.504325	1.55582	1.16212	0.613385	0.596155	0.537275	-0.406525	1.27501	0.08274	1.28293	1.37596	1.1518	0.298355	0.60415	0.786945	0.868855	0.6931	0.89264	0.79558	0.86012	0.648095	-0.00495	0.29251	0.721845
YCL050C	1.34058	1.22476	1.17172	1.19765	1.2767	1.24771	0.53536	1.00635	0.697665	0.642775	0.56933	0.842315	0.397275	0.665655	0.727225	0.467855	0.57997	0.76411	1.21652	1.28256	0.44914	0.387375	0.38603	0.680665	0.96516	0.941305	0.8514	0.388025	0.979855	0.717725	1.19271	1.06246	1.00497	0.70296	0.99205	0.96707	1.05562	1.02286	0.51322	0.786105	1.02327	0.46498	1.0307	0.35791	1.0976	0.828095	0.75001	0.69626	1.03646
YPR098C	1.49415	1.08655	1.30172	1.17159	1.68499	0.92622	2.14844	1.62299	1.73704	1.37156	2.04091	1.71542	0.850095	1.01977	1.02828	0.940105	1.39164	1.28521	1.19155	0.49885	1.41077	1.18321	1.26659	1.27151	1.75883	0.801545	1.90663	0.926855	1.03242	1.71791	0.984115	1.03178	1.53099	0.74532	1.05494	0.88445	1.52661	1.01686	1.17147	1.142	1.52292	1.75143	1.43852	1.19991	1.43589	1.33817	1.82886	1.25154	1.41837
YPL015C	1.0417	1.14892	1.50056	0.93018	1.15328	0.56646	1.2065	1.24944	1.40884	0.994365	1.58653	0.570255	0.019585	0.057685	0.228815	0.007745	0.47764	0.03632	0.80929	0.63698	0.48381	0.200985	0.55255	0.100465	0.90112	0.125435	0.67373	-0.072725	1.09289	1.30532	0.098855	0.623535	1.0665	0.71469	1.454	0.87616	1.40892	0.454865	1.00198	0.143615	0.799785	1.2307	1.14237	1.09587	0.93703	1.10817	0.57875	0.36688	0.756845
YMR193W	0.51055	0.5834	0.45666	0.60956	0.22753	0.37357	-0.19205	-0.474195	0.484195	0.222285	0.64648	0.012515	0.167395	-0.371225	1.5e-05	-0.088095	0.00388	-0.47227	-0.28685	0.36811	1.14553	0.327005	0.10107	0.653005	0.53215	0.884665	0.03836	0.699955	0.378325	0.223305	1.60569	0.024225	0.32668	0.73117	0.17862	0.27482	-0.34634	0.443055	-0.13693	0.914615	0.447565	-0.56655	0.21193	0.2072	0.31666	0.275275	-0.1585	-0.33292	0.217565
YLR031W	-0.32097	-0.18837	-0.30585	-0.08471	-0.21953	0.17748	-0.2252	0.050195	-0.358525	0.113625	-0.32713	-0.123725	0.076255	0.255545	0.398225	0.380445	-0.11873	0.30805	0.15298	0.49757	0.24268	0.786875	0.10703	0.906825	0.0658	0.422155	-0.52691	0.546455	0.183095	0.186415	0.360825	1.26551	-0.51208	0.59813	0.33737	0.42658	-0.4029	0.591475	-0.22831	0.853705	0.409305	0.50534	0.37228	-0.32257	0.42777	0.524545	0.27343	0.06751	-0.090835
YIL014C-A	1.40575	0.70281	1.0409	1.05505	1.29673	0.41273	0.78613	-0.623625	-0.265335	-0.033195	0.31273	-0.703145	1.38257	1.51978	1.30228	1.59522	1.60373	0.99132	1.10231	0.6383	1.1938	1.21606	0.28327	0.147585	0.29062	0.391095	0.55213	-0.084685	0.876195	1.03903	0.168435	0.886515	0.01594	0.54546	1.23431	1.0039	0.93723	0.286275	0.11908	0.475985	1.21327	1.40798	0.33309	0.12807	0.17832	0.799985	1.60256	1.43309	1.40026
YGR053C	1.6968	2.65682	1.89093	2.16132	1.75896	2.2667	2.1299	2.35343	2.31758	2.63537	2.2649	2.21423	1.48775	1.759	1.22022	2.10684	1.54729	1.52127	1.10308	1.99395	1.23354	1.60343	1.27409	1.8353	1.53734	1.75787	0.94529	1.86587	0.804485	1.52592	2.31589	2.70323	2.03715	3.13295	1.54679	1.9205	0.96611	1.76381	1.33661	1.84513	1.56986	1.08798	1.31166	2.17253	1.37804	1.62211	1.63436	1.32836	1.10911
YCR101C	0.96914	0.68992	0.95938	1.12975	0.96271	0.96719	0.19237	0.690005	0.082435	0.579265	0.19417	0.029615	0.578975	1.35098	0.966815	0.646425	1.16199	1.28664	0.8049	0.61708	0.2663	0.439985	0.76472	-0.102185	0.94907	0.772535	0.68627	0.608395	0.733185	0.949685	0.248775	0.234655	0.30922	1.19698	1.03201	0.64036	0.753	0.654845	0.20608	0.109255	0.565135	0.57238	0.69898	0.45794	0.38805	1.05313	0.58549	0.68724	0.733905
YER087C-B	-0.42161	-0.20933	0.02001	-0.30558	0.02017	-0.5614	-0.30061	-0.399675	-0.004495	0.015485	0.21854	-0.183465	0.048125	0.124785	0.353385	0.143565	0.32724	0.22976	-0.45506	-0.68294	-0.77407	-0.494985	-0.41375	-0.379605	0.09282	-0.381255	0.00427	-0.666095	-0.569615	0.349635	-0.414465	-0.122415	-0.50609	-0.71485	-0.26387	-0.42488	-0.46412	-0.669405	-0.28518	-0.366815	-0.305075	0.10373	0.20457	0.15127	-0.61536	-0.410645	-0.45761	-0.73541	-0.503955
YOR280C	0.32953	-0.04901	0.15661	0.40862	0.1825	0.2347	0.13678	-0.097305	-0.117865	0.050535	0.21502	0.070615	0.211425	-0.058285	0.175025	0.106655	0.27601	0.22417	0.5726	-0.07692	0.06882	-0.117895	-0.09457	0.278065	0.1517	-0.163355	0.13182	0.079695	0.097315	-0.130485	0.259575	0.188755	-0.12581	-0.01566	0.14966	0.08825	0.18113	-0.254135	-0.12233	0.088585	0.432215	-0.15997	0.16314	-0.28706	0.04132	0.040945	0.49633	0.11785	0.208525
YGR097W	1.32821	1.22483	1.34648	1.03201	1.21761	1.06381	1.89211	1.94755	2.1376	1.84584	1.56533	2.03434	2.03783	1.96131	2.14425	1.55124	1.82206	1.99929	1.66551	1.71126	0.99062	0.978775	0.91914	0.813255	1.48293	1.24713	1.86557	1.31893	1.19419	0.646515	0.807325	0.954775	1.44601	1.40396	0.757	0.98828	1.52067	1.34421	0.94432	0.716945	1.22104	1.12829	1.92639	1.38247	2.37968	0.776035	1.90625	1.05799	1.23572
YHR215W	-2.05972	-2.43968	-2.02141	-1.78563	-2.03744	-2.37049	0.66108	0.838655	0.432045	0.543605	0.62192	0.813505	0.505905	1.69222	1.11939	1.38609	1.78551	1.68155	-1.51107	-1.52062	-2.88205	-2.14436	-1.03033	-0.607185	-1.42736	-1.7672	-2.21479	-2.12576	-2.1667	-1.69843	-1.8659	-2.1593	-0.56202	-0.50926	-1.8473	-2.10359	0.05211	-0.081945	-0.37883	-0.047945	-0.465125	0.075	0.49812	0.3975	0.22991	-2.4213	0.24873	0.71202	-0.571465
YKL025C	0.02925	0.17079	0.13296	0.16475	-0.1012	0.35847	0.51167	0.800635	0.424175	0.760665	0.33698	0.744185	0.346825	0.608525	0.383755	0.523715	0.35525	0.79757	-0.05582	0.4963	-0.17044	0.497935	0.17427	0.196675	0.04482	0.490725	0.18997	-0.024145	0.265895	-0.130325	0.285905	0.458285	0.04723	0.31026	-0.16136	0.3806	0.54374	0.622105	0.21893	0.095365	0.521345	0.42545	0.24008	-0.04242	0.29839	0.267765	0.18831	0.66727	0.054695
YKR011C	3.4248	2.93741	3.45058	2.83035	3.43255	3.65042	3.89911	3.20602	3.49869	4.02993	3.7362	3.80539	3.54825	3.60738	3.87096	2.7336	3.65089	3.58732	3.38815	3.03619	2.90897	2.11463	2.40209	3.48111	2.08976	1.9486	2.53917	2.17271	2.70607	2.73433	3.50843	2.53457	2.50696	2.14783	3.06466	3.24973	2.53255	2.63965	2.46939	3.56426	2.81169	1.59706	2.78326	1.97337	3.62859	2.9807	3.11617	2.87412	3.47606
YEL004W	0.50659	0.55578	0.59415	0.66159	0.57806	0.65491	0.66936	0.975745	0.809375	0.654545	0.68137	0.411395	0.381785	0.648025	0.359955	0.403565	0.5809	0.4465	0.13566	0.21463	0.50681	0.738435	0.5061	0.212435	1.03535	0.515205	0.846	0.817315	0.105815	0.888845	0.108815	0.545855	0.57041	0.68153	0.42893	0.54857	0.47518	0.466365	0.78467	0.225595	0.794095	0.89276	0.45035	0.76409	0.28476	0.593895	0.60732	0.90338	0.594485
YJL200C	-3.27711	-3.11048	-2.7106	-2.58721	-2.81459	-3.42367	-3.00487	-3.39908	-2.73826	-3.48665	-3.46756	-2.5935	-2.94527	-3.08582	-2.86187	-2.22309	-3.09174	-2.95919	-2.5875	-3.08701	-3.35562	-2.62434	-2.12688	-1.88004	-2.98872	-2.86429	-2.55118	-2.62896	-2.8184	-2.51477	-2.77639	-2.69016	-3.17291	-2.09424	-2.74283	-2.5803	-2.45276	-2.64033	-2.16623	-2.74954	-2.67455	-2.04559	-2.78093	-1.95311	-3.19329	-3.4308	-3.09264	-3.47462	-3.29873
YLL027W	-0.32939	-0.73224	-0.65124	-0.83731	-0.05511	-0.64924	-0.41241	-0.385655	-0.518955	-0.824915	-0.57685	-0.719905	-0.632965	-0.520275	-0.439855	0.187175	-0.51906	-0.30517	-0.14864	-0.28519	-0.42398	-0.191885	-0.25421	-0.286105	-0.8093	-0.526825	-0.39678	-0.332345	-0.538705	-0.498165	-0.722015	-0.628145	-0.4448	-0.65349	-0.70771	-0.55935	-0.36846	-0.118575	-0.67156	-0.196555	-0.745205	-0.19505	-0.58643	-0.70875	-0.23363	-0.745515	-0.34669	-0.62952	-0.329375
YOR024W	0.68134	1.32053	0.26125	0.20248	0.15877	-0.61128	0.13189	0.321445	-0.252285	0.054105	-0.31372	0.109895	0.367545	-0.144085	0.074015	0.273945	0.06724	-0.65434	1.17716	0.89492	1.08679	0.652295	0.64341	0.572325	0.47254	1.14899	0.73379	0.629005	1.46727	0.630815	0.661665	0.583715	0.26641	-0.06352	0.91125	0.75055	0.52401	0.826245	1.18012	0.329065	0.411585	0.02097	0.94058	0.59304	1.07482	0.970305	0.64382	0.21887	1.12067
YLR045C	-0.22059	-0.08647	-0.37886	-0.34144	-0.38529	-0.42582	-0.80147	-0.929385	-0.557615	-0.649965	-0.63973	-0.638205	-0.130065	-0.429595	-0.295605	-0.372435	-0.47277	-0.61776	-0.82755	-0.59937	-0.33081	-0.661945	-0.36397	-0.254985	-0.95932	-0.846615	-0.51767	-0.918055	-0.596015	-0.564005	-0.144625	-0.419765	-0.48973	-0.17726	-0.7563	-0.66051	-1.11962	-0.796265	-0.44414	-0.154655	-0.586375	-0.64967	-0.8265	-0.28522	-0.45862	-0.591525	-1.19372	-1.30833	-0.538045
YDR348C	0.7166	0.83785	0.75844	0.61141	0.74121	0.69271	0.34129	-0.046055	0.313995	-0.028515	0.10423	0.177715	0.175325	-0.109555	0.116145	-0.016205	-0.08607	0.29267	0.31484	0.50093	0.08903	0.269535	0.16934	-0.176065	0.10468	0.371825	0.53547	0.633745	0.570745	0.468925	-0.125535	0.032275	0.35129	0.19102	0.586	0.38568	0.34487	0.274155	0.45766	-0.031055	0.321145	0.40405	0.55554	0.54321	0.34364	0.162605	0.39266	-0.0558	0.744255
YPL183C	-1.87921	-1.83254	-2.02087	-1.77967	-1.62215	-1.77009	-2.07288	-1.75873	-2.09657	-2.46692	-2.24765	-1.82075	-1.27399	-1.06001	-1.56688	-1.22836	-1.18019	-1.35335	-1.88154	-2.2037	-1.91241	-1.7858	-1.6599	-1.36827	-1.70345	-1.77719	-2.0203	-1.72904	-2.25406	-1.57437	-2.43721	-1.73744	-1.62658	-1.37529	-2.15122	-1.99903	-1.30857	-1.30097	-1.83428	-1.72296	-1.96907	-1.63009	-2.16362	-1.67116	-2.04591	-2.16743	-1.85355	-2.17526	-1.82546
YGR003W	-1.40841	-1.03942	-1.20098	-0.77313	-1.60685	-1.19311	-1.04306	-0.691265	-0.965495	-0.955025	-1.2993	-0.929515	-1.27567	-0.788555	-1.00656	-0.885615	-0.90367	-0.93396	-0.85509	-0.73876	-1.16021	-0.895245	-1.38827	-0.990035	-1.04051	-0.857615	-1.38212	-1.07973	-0.639595	-0.888105	-1.50392	-0.850685	-1.2026	-0.61234	-1.10728	-0.71759	-0.83462	-0.713275	-1.07959	-1.03761	-0.974575	-1.13416	-1.24657	-0.85268	-1.32048	-0.953305	-1.69791	-1.00115	-1.38132
YEL008C-A	-1.36449	-0.94939	-0.75513	-0.67763	-0.69408	-0.47803	-0.5347	-0.983405	-0.951235	-0.110075	-0.41105	0.075005	-1.39132	-1.49645	-1.35947	-0.585495	-1.23803	-0.56675	-0.7553	-0.93224	-0.47843	-0.397465	-0.00181	0.279025	-0.07198	-0.872895	-0.69579	-1.12119	-0.978675	-0.515835	-1.53774	-0.892475	-0.95081	-0.57013	-1.00246	-0.4353	-0.7582	-0.704315	-0.68059	-0.356755	-0.108615	-0.21831	-0.70611	-0.10917	-0.64043	-0.710965	-0.65667	-0.47818	-0.951685
YBL095W	0.08526	-0.14181	0.20264	0.13889	0.40901	0.04932	-0.21853	-0.286625	-0.337005	-0.330315	-0.07869	-0.298205	-0.537895	-0.316365	-0.705895	-0.443085	-0.76542	-0.37759	-0.1161	-0.45567	-0.07704	-0.103805	-0.15691	-0.575015	0.16922	-0.237545	0.30814	0.117675	-0.366155	-0.044735	-0.337775	-0.423765	-0.18451	-0.13328	0.11365	-0.24502	-0.2201	-0.357145	0.35507	-0.452155	-0.189975	0.17195	0.18659	0.25961	-0.19323	0.094855	-0.30006	0.20153	-0.309595
YGL060W	-0.05855	-0.35709	-0.21385	-0.28348	-0.20796	-0.33543	-0.71783	-0.620395	-1.00235	-0.554335	-0.86774	-0.712055	-0.147655	-0.019715	-0.044115	0.113965	-0.03592	-0.40771	-0.5241	-0.6161	-1.16402	-1.00351	-0.24433	-0.706765	-0.58877	-0.653575	-0.39429	-0.522745	-0.877215	-1.09112	-0.611095	-0.203345	-1.12081	-0.51194	-0.99428	-0.9093	-1.03186	-0.982205	-0.74597	-0.893225	-0.183045	-0.30066	-0.90893	-0.8853	-1.03664	-0.961085	-1.01047	-0.98132	-1.2938
YLL007C	0.27108	0.27158	0.31612	0.4274	0.40681	0.70766	0.69924	0.928575	0.500605	0.662815	0.38764	0.730615	0.260145	0.607115	0.237925	0.458545	0.24883	0.57302	0.45517	0.3569	0.06226	0.535965	0.33082	0.395665	0.31091	0.387615	0.35343	0.250175	0.424265	-0.007275	0.278625	0.583705	0.4229	0.67424	0.04593	0.27994	0.67455	0.523345	0.20336	0.266145	0.594405	0.40298	0.59354	0.38175	0.4741	0.047365	0.21928	0.83269	0.250495
YEL009C	-1.23681	-1.22724	-1.31226	-1.01744	-1.00812	-0.95971	-1.02224	-0.860825	-1.13792	-0.914645	-1.10812	-0.724295	-0.167305	-0.233585	-0.290705	-0.354945	-0.13503	-0.47915	-1.30704	-1.37148	-1.43114	-1.29689	-1.10385	-0.729235	-0.87871	-0.961935	-1.8575	-2.24848	-0.895945	-1.39619	-1.97029	-1.41932	-0.8382	-0.80597	-1.54791	-1.186	-0.91881	-0.735575	-1.0087	-0.802635	-1.05055	-0.91374	-1.16826	-1.35903	-2.20758	-1.67768	-1.52102	-1.54755	-1.60262
YEL015W	-0.49365	-0.60167	-0.65937	-0.55842	-0.99454	-0.38646	-0.63048	-0.301665	-0.389515	-0.681445	-0.59971	-0.552555	-0.171175	-0.405645	-0.310885	-0.613755	-0.24183	-0.44843	-0.90449	-0.47491	-0.57545	-0.736405	-0.72503	-0.174965	-0.91431	-0.414845	-0.82556	-0.991725	-0.860355	-0.556775	-0.220185	-0.724145	-0.55238	-0.19688	-0.74859	-0.67536	-0.81959	-0.564035	-0.46976	-0.366805	-0.759145	-1.2897	-0.95341	-0.6032	-0.65	-0.742105	-0.771	-1.31152	-0.991075
YOR083W	-0.3643	-0.29008	-0.45086	-0.52613	-0.51696	-0.35281	-0.4497	-0.660995	-0.461165	-0.448795	-0.25735	-0.486735	-0.213045	-0.327025	-0.410665	-0.252965	-0.61131	-0.07694	-0.52148	-0.97459	-0.01713	-0.135395	-0.27887	0.210645	0.10353	-0.153975	-0.40961	-0.732095	-0.798035	-0.505025	-1.36396	-0.823045	0.04063	0.06004	-0.74872	-0.71044	-0.07686	-0.481515	0.3391	0.358015	-0.259445	0.67476	-0.25481	-0.45407	-0.3496	-0.310835	-0.03061	0.02683	0.300475
YBR252W	-1.55914	-1.58768	-0.98038	-1.30731	-1.12107	-1.74704	-1.98356	-2.1046	-1.72158	-1.91253	-1.63896	-1.69949	-1.73805	-1.92656	-1.73626	-1.62248	-1.62359	-1.67103	-1.54249	-2.27486	-2.11426	-1.68556	-1.42312	-1.79168	-1.5629	-1.76594	-1.62986	-1.45252	-1.7343	-1.39385	-1.99768	-1.80082	-1.91363	-1.24148	-1.50861	-1.68123	-1.56083	-1.98584	-1.57173	-2.158	-1.73284	-1.38327	-1.46428	-1.48048	-1.74524	-2.00192	-1.4496	-2.18012	-1.60238
YDR329C	0.10754	0.34628	0.37351	0.51374	0.07104	0.30936	0.53846	0.542735	0.879235	0.652025	0.76615	0.716405	-0.116325	-0.134345	0.181485	-0.028555	-0.10053	0.19504	-0.29696	0.29434	0.65509	0.327015	0.38717	-0.077225	0.23316	0.690955	0.10424	0.418195	0.061265	0.059185	1.14993	0.212965	-0.04269	0.14708	-0.03359	0.10181	-0.07896	0.577245	0.04161	0.236845	0.272175	-0.08838	0.38909	0.5645	0.18174	0.250465	0.12227	0.05779	0.026595
YDL202W	-0.08358	0.14628	-0.09702	-0.10791	-0.15902	-0.15298	-0.37322	-0.670945	-0.422775	-0.437075	0.11089	-0.390165	-0.006145	-0.400305	-0.212175	-0.184115	-0.1196	-0.35137	-0.55291	-0.1427	0.00499	-0.188615	-0.31922	0.322145	-0.20348	0.017475	-0.79799	-0.340085	-0.223385	-0.262885	-0.017225	-0.387465	-0.25511	-0.16073	-0.17336	-0.0025	-0.4536	-0.198205	-0.44564	0.179275	-0.538365	-0.43415	-0.38795	-0.30414	-0.12463	-0.226385	-0.18191	-0.34764	-0.442385
YHR209W	0.52426	0.48457	0.58625	0.56489	0.88625	0.88407	1.25201	1.241	0.674645	1.5254	1.25171	1.01195	1.35922	1.7771	1.08681	1.01601	1.17661	1.18538	0.88536	0.75953	0.66949	0.597435	0.78744	0.907395	-0.14518	-0.555965	1.11727	0.546265	0.327615	0.052215	1.17043	2.22865	0.18059	0.74244	1.11143	0.89295	0.28276	0.056345	-0.17683	0.432355	0.564365	0.37709	0.32774	-0.31694	0.21402	-0.076945	0.74359	0.87944	0.462105
YPR008W	1.29503	1.22489	1.34732	1.01517	1.28977	1.23457	0.80905	0.659445	1.078	0.927045	0.91429	1.00072	1.19634	1.1968	1.16548	0.942255	1.17212	1.23331	1.09811	1.21096	1.2919	0.904525	1.00143	0.608195	0.74665	1.31082	0.78075	0.385445	1.31313	0.599385	1.18067	0.776065	1.11966	1.07859	0.69311	0.63054	1.14551	1.46355	0.77861	0.299635	0.679035	1.04289	0.92402	1.02638	1.49051	0.713915	0.98807	1.07243	1.108
YER075C	-0.45335	-0.45464	-0.54355	-0.43385	-0.6264	-0.4772	-1.22792	-1.09973	-0.979485	-1.1323	-1.3892	-0.928625	-0.745995	-0.761685	-0.827215	-0.711955	-1.08598	-0.92884	-0.34057	-0.56356	-1.40607	-1.11267	-1.06564	-0.955095	-0.99368	-0.875335	-1.00489	-1.08028	-0.400995	-0.959885	-1.6226	-0.672215	-0.71926	-0.34512	-1.01253	-0.76911	-0.91339	-0.830895	-1.11557	-1.35712	-1.02807	-0.53765	-0.42933	-0.25385	-0.87282	-1.03432	-0.77666	-0.96655	-1.03625
YDL203C	-0.75674	-0.75559	-0.625	-0.87862	-0.60599	-0.79904	-0.59453	-0.443175	-0.516575	-0.465655	-0.69079	-0.557225	-0.553705	-0.524865	-0.567225	-0.450065	-0.60052	-0.50801	-0.29882	-0.66307	-0.79157	-0.440445	-0.88089	-1.05326	-0.48533	-0.632635	-0.68753	-0.517995	-0.993035	-0.682015	-0.704565	-0.609085	-0.80134	-0.57464	-0.6785	-0.72958	-0.50382	-0.616075	-0.82893	-0.987735	-0.775625	-0.29841	-0.86616	-0.73581	-0.55147	-0.708275	-0.55176	-0.42782	-0.755765
YBR050C	0.81681	1.13884	0.70897	0.62287	0.76385	1.35224	1.7092	1.37993	1.47971	1.95312	1.50101	1.80757	1.57272	1.48117	1.2769	1.55418	0.87724	1.32447	0.99849	0.98221	0.99728	1.26886	1.62763	2.09549	1.2257	1.32859	0.86403	1.18111	0.912345	0.643495	1.51357	2.48833	1.31606	1.92052	0.92716	1.09554	1.31154	1.42085	1.30555	2.09257	1.29825	1.33047	1.69468	1.53105	1.56206	0.957545	0.42952	1.63123	0.695185
YMR197C	1.01519	1.15493	0.97337	0.99858	0.74807	1.41002	0.87533	1.01831	1.22225	1.16383	1.3857	0.876605	0.858625	0.656015	0.795395	0.481985	0.78022	0.96489	0.47073	1.45031	1.4842	0.967315	0.79876	0.774455	0.54403	1.24053	0.58147	1.2113	1.28164	0.530805	1.47874	0.852145	0.68819	-0.36701	0.78023	1.01019	0.32835	1.13844	0.84665	1.29415	1.18029	0.53143	0.77224	0.86451	1.30338	0.924285	0.64306	0.92155	0.769555
YDR261W-A	4.11773	3.1912	4.00288	2.78602	3.53202	3.54812	3.72098	3.02664	3.6276	3.73021	3.31987	3.26971	1.29797	0.455015	1.05391	1.07889	0.53631	1.05548	2.50833	3.16736	3.16964	2.68822	1.27854	2.35668	1.55986	2.28457	2.29853	2.8009	1.65782	4.03866	2.72885	2.46517	1.07768	0.8884	2.32415	2.67015	1.36849	1.63613	0.77664	2.31103	2.60392	2.14507	1.60647	2.39128	5.0871	4.72574	3.6927	2.97853	3.6612
YDR134C	0.20647	0.40781	0.30949	0.2437	0.32275	0.19184	0.16419	0.085565	0.006765	-0.020645	-0.03383	-0.070605	0.515005	0.592895	0.717645	0.717605	1.0335	0.47974	1.02143	0.75688	1.04411	0.794895	0.51366	-0.380065	1.02678	1.01022	1.06035	1.02551	-0.149525	-0.548905	0.507555	0.121775	0.7544	0.26918	0.60322	0.28616	0.28515	0.328895	1.01671	-0.175845	0.886555	1.0588	0.86065	0.84486	-0.4276	-0.507425	1.54839	1.04721	-0.042155
YBL049W	1.08534	1.74034	1.28931	1.26338	1.36152	1.24926	1.9904	1.941	1.91335	2.02629	2.07789	2.63898	1.3657	1.06402	1.10865	1.6601	1.12598	1.32623	1.78628	1.7732	1.26989	2.12974	2.04834	1.91244	1.93599	1.63125	1.94769	2.26991	0.941435	1.70718	2.1812	2.31659	1.19965	1.40475	1.75096	1.09449	1.30248	1.58872	1.48928	1.64526	1.88827	2.4845	1.67135	2.16159	1.30735	1.34762	2.16667	2.23786	1.37858
YER054C	2.63608	3.28873	2.62324	2.65756	3.06681	3.33136	4.61633	4.40411	4.6017	4.95866	4.27822	4.99012	2.87108	3.40895	3.55053	4.12268	3.44799	3.97247	2.95192	3.91125	4.64238	4.6163	4.29427	3.69207	4.32603	4.418	4.2219	4.14206	2.34741	2.01381	4.80992	5.05396	4.59741	4.2867	3.07455	3.22761	4.01	4.69625	4.24758	4.00763	4.56109	3.75995	3.26751	2.93063	4.56233	2.52759	4.58766	3.7998	4.19351
YDR305C	0.70781	0.53213	0.79103	0.68969	0.36563	0.58643	0.12487	0.191375	0.287285	0.554425	0.59883	0.126265	0.265155	0.195205	0.356325	0.385735	0.33471	0.38178	0.17138	0.15769	0.38936	0.262285	0.1533	0.265185	0.11682	0.418685	0.33319	0.407335	0.455715	0.396605	0.325795	0.308375	0.33044	0.18174	0.33473	0.13922	0.20605	0.042325	0.05066	0.354535	0.234995	-0.069	0.2481	0.14268	0.45077	0.606485	0.06423	0.53335	0.705545
YHL019W-A	-0.25552	0.38576	-0.1242	-0.2762	-0.28712	-0.19459	0.13289	-0.040305	-0.149425	-0.197055	-0.30129	0.126725	-0.154975	0.001205	-0.218645	-0.140825	0.11766	0.06423	-0.09517	-0.14151	0.77521	0.249215	0.48417	0.124125	0.34446	0.487195	1.14227	0.572185	0.474795	-0.189675	0.456335	-0.053055	0.86805	-0.32077	0.08414	-0.00735	0.43136	0.061665	0.29383	0.224965	0.765385	0.42853	0.82357	0.458	0.59921	0.096955	0.13626	1.15547	0.440365
YNL201C	-0.63933	-0.36807	-0.49888	-0.36832	-0.64413	-0.41926	-0.50739	-0.267625	-0.615995	-0.483835	-0.61183	-0.431775	-0.316165	-0.215835	-0.345125	-0.283295	-0.30781	-0.19649	-0.7834	-0.43806	-0.93481	-0.881135	-0.88806	-0.614575	-0.98997	-0.567285	-0.77031	-0.580545	-0.643085	-0.588525	-0.847295	-0.522985	-0.47353	-0.76401	-0.96998	-0.84577	-0.6241	-0.285075	-0.83406	-0.976735	-0.620495	-0.39988	-1.09915	-0.44597	-0.76948	-0.569855	-0.84343	-0.6362	-0.556335
YHR180W-A	-0.07908	0.10806	-0.15154	0.45459	0.6864	-0.84297	-0.71031	0.658585	0.799545	-0.586365	-0.29647	1.49307	-0.588655	-0.563905	-0.037485	0.744815	0.17094	-0.16547	-0.75806	-0.85359	-0.92372	-0.857365	0.94145	-0.994655	-1.97086	-0.107915	0.71501	-0.120315	-0.227285	0.848935	0.250135	0.318915	-0.10248	-0.24477	0.0912	-0.04659	-0.18933	0.173975	0.84031	-0.488815	-0.240405	-0.01625	0.96414	0.89759	0.57934	1.42789	1.43836	-0.2177	0.378425
YCR061W	2.3396	2.32921	2.17965	2.09383	2.67409	2.33768	3.09658	3.16614	2.98998	3.07601	3.35229	3.07163	2.50748	2.30229	2.35763	2.26593	2.25536	2.46729	2.21599	1.68903	2.51666	2.28531	2.46975	1.7447	3.66941	2.37458	2.82495	2.00276	2.03451	2.7486	2.63354	2.85659	2.57954	2.10315	2.17822	2.0703	2.71672	2.45573	3.55306	2.5821	2.54508	3.37193	2.66491	2.07708	2.93888	2.82983	2.8721	2.12526	2.72769
YBR206W	-0.46953	-0.53562	-0.65201	-0.46334	-0.30797	-0.50166	0.02275	0.140425	-0.402765	-0.331895	-0.14271	-0.071605	-0.387775	-0.186245	-0.136435	0.120865	-0.16723	-0.06646	-0.26185	-0.5679	-0.72836	-0.554095	-0.46794	-0.427385	-0.23712	-0.858755	-0.41075	-0.262025	-0.706685	-0.322805	-0.507005	-0.387685	-0.56894	-0.49654	-0.69928	-0.45478	-0.41304	-0.826705	-0.43992	-0.318275	-0.423115	-0.55867	-0.67785	-0.27679	-0.47264	-0.710455	-0.4059	-0.54447	-0.640705
YHR051W	0.4812	0.14407	0.42065	0.59232	-0.04515	0.58563	0.60486	0.986045	0.489345	0.642925	0.45957	0.654455	0.006405	0.111165	0.132735	0.097655	0.29275	-0.33226	0.35768	0.56867	0.05695	0.280345	-0.25202	0.203125	0.66228	0.668065	0.2913	0.227885	1.25474	0.505705	0.300635	0.011695	0.63856	0.34167	0.40211	0.34503	0.61158	0.691365	0.24461	0.347265	0.193825	0.36661	0.99604	0.20117	0.62637	0.425865	0.25295	-0.17144	0.194185
YDL116W	-0.14125	-0.31274	-0.29211	-0.09619	-0.2508	-0.06223	-0.32288	-0.152255	-0.399625	-0.658685	-0.52098	-0.369055	-0.175785	0.005865	-0.196835	-0.257145	-0.14582	-0.07185	-0.23761	-0.31013	-0.42854	-0.212315	-0.52543	-0.454635	-0.54296	-0.476725	-0.49551	-0.464855	-0.322465	-0.485215	-0.534135	-0.448245	-0.3236	-0.01597	-0.54073	-0.28994	-0.33618	-0.095405	-0.48685	-0.525595	-0.365575	-0.72768	-0.41065	-0.53523	-0.30362	-0.542535	-0.50088	-0.47735	-0.364825
YPL171C	0.3204	0.49617	0.74461	0.95212	1.21822	0.66531	2.90659	2.64798	2.52195	3.25804	3.26365	3.4771	1.06605	1.3561	1.25964	2.53243	1.19983	1.3318	2.31519	1.40986	2.21411	2.98915	2.79155	2.88811	1.71661	1.90769	2.3613	1.94005	0.814395	1.47806	2.44805	2.75102	1.88176	1.17555	1.34894	1.67028	1.44747	0.997685	2.28399	1.84	0.933125	1.65463	1.87448	2.2745	0.78291	1.14617	0.68029	4.74968	1.15725
YPR124W	0.24691	0.09768	0.29742	0.21937	-0.08095	0.40119	-1.38938	-0.650905	-0.566355	-1.13942	-0.68235	-0.742975	-1.67667	-1.88918	-1.74693	-1.1621	-1.5769	-1.90471	0.03936	0.17286	-0.58079	-0.528155	-0.40303	-0.834955	-0.11032	0.430155	-0.9977	-0.656125	0.522055	-0.400475	-0.283335	-0.634135	-0.09001	-0.30202	-0.11409	-0.36626	-0.4368	0.197055	-0.70105	-1.17511	-0.197545	-0.3964	-0.56098	-0.1246	-1.0779	-0.420415	-0.4572	0.17952	-0.886295
YJL023C	0.09539	0.16032	0.23271	0.01624	-0.06004	0.73213	0.05202	0.303365	0.013075	0.120315	0.00645	-0.060055	-0.006735	0.281985	0.060475	-0.412785	0.12442	0.06808	-0.12788	0.33751	0.02687	-0.004895	-0.23936	0.244505	-0.12313	0.146015	-0.26105	0.439255	0.342005	0.220525	0.768515	0.635875	-0.16372	1.20397	-0.01043	0.32828	-0.10118	0.104365	-0.35627	0.082545	0.193615	-0.79518	-0.10205	0.37858	0.07766	0.129185	-0.33335	0.2474	-0.018365
YGL167C	-0.07471	0.09474	-0.05774	0.24181	-0.06326	1e-05	0.46192	0.457665	0.422855	0.351185	0.36713	0.519105	0.267195	0.468255	0.277565	0.117885	0.59382	0.37835	-0.09801	-0.09615	-0.16889	0.094735	-0.02619	0.118845	0.29667	0.054865	0.14359	-0.107165	-0.041965	0.395135	-0.412545	0.009265	0.04507	0.06933	-0.27245	-0.03715	0.26668	0.189695	0.32067	0.098055	0.022975	0.17824	-0.10609	0.17131	-0.27953	0.321365	-0.03973	-0.02168	0.046795
YDL165W	0.04807	-0.10322	0.40819	0.0048	0.05677	0.16911	0.29961	-0.076445	0.153415	-0.108635	0.14173	-0.125835	-0.340195	-0.419695	-0.076585	-0.322095	-0.2023	-0.64618	-0.16804	-0.38517	-0.35567	-0.415935	-0.37422	-0.297485	-0.28649	-0.411415	-0.04615	-0.039805	-0.077235	0.086205	-0.140895	-0.042155	-0.25059	-0.3494	0.03743	-0.16064	0.07455	-0.598015	-0.4576	-0.484795	0.176865	-0.19628	0.13261	-0.57545	0.05766	0.172765	-0.18459	-0.15553	0.003865
YLR154C-H	0.80141	-1.51517	-0.20403	-0.0025	0.21535	0.01257	-0.08096	0.178845	0.238035	-0.214095	-0.05028	-0.522805	0.075465	0.111555	0.238605	-0.389635	-0.69383	-0.25439	1.01062	0.43667	0.48877	0.720365	0.73512	0.235935	0.5651	1.05261	1.60377	0.541165	0.956845	0.267515	1.14309	0.778305	0.56913	-0.11569	1.79692	0.51081	0.97742	-0.195635	0.56225	-0.334045	0.621465	0.26639	0.33645	0.48929	0.21605	0.312145	1.19696	0.41271	1.5984
YIL143C	0.52951	0.43013	0.42524	0.53932	0.4796	0.4053	0.57257	0.822575	0.444975	0.479805	0.38015	0.483965	0.462885	0.691275	0.606705	0.545205	0.7621	0.76829	0.38125	0.61285	0.3845	0.401225	0.39568	0.447485	0.22957	0.286905	0.20572	-0.007735	0.264785	-0.139015	0.046665	0.447885	0.20523	0.52999	0.53102	0.57595	0.55447	0.702525	0.33999	0.134095	0.577955	0.41615	0.19237	0.25573	0.61538	0.132725	0.35893	0.67805	0.652005
YPL119C-A	1.56293	1.39006	1.31208	1.6752	1.55338	2.03185	2.33105	1.35991	1.9773	2.43495	1.53083	1.92888	0.078055	0.887435	0.273075	1.6119	-0.02559	0.69699	0.89941	1.21364	1.51909	1.79583	1.2864	1.10362	1.99364	1.52738	1.51777	1.61288	0.890095	0.916025	0.792125	2.41316	0.01406	0.45746	1.2485	1.45941	1.47843	1.48968	1.49484	1.3657	2.10954	2.42236	1.96975	0.6788	1.58019	1.5379	1.31851	1.71029	1.10444
YBR292C	-0.11184	-0.3245	-0.29006	-0.69606	-0.49676	-0.37583	-1.07798	-0.739925	0.219015	0.089985	-0.42399	-0.843185	-0.435115	-0.490055	-0.413955	-0.563565	-1.02825	-0.39839	-0.34399	-0.27753	0.85286	-0.264585	0.08653	-0.343025	0.21284	-0.347025	-0.12878	-0.468785	-0.318575	0.091825	-1.08047	-0.084345	-0.95245	-0.42841	-0.53917	-0.14876	0.12879	0.030965	-0.34511	-0.516135	-0.320595	0.23906	0.51562	-0.15248	0.27109	-0.422035	-0.43909	0.02799	-0.678855
YGR240C	-0.28282	-0.23937	-0.2589	0.00624	-0.09977	-0.22267	0.09016	0.305825	0.182345	-0.189405	0.13545	0.099095	0.209375	0.325265	0.339615	0.183335	0.30297	0.35361	-0.03215	0.05036	-0.26294	-0.006325	-0.02518	-0.106245	0.27879	0.001115	0.17863	-0.127505	-0.103045	0.056075	-0.661785	0.034395	0.20849	0.09723	-0.21233	-0.24171	0.0857	0.056675	-0.01804	-0.157005	-0.094795	0.18561	0.23989	0.10986	-0.39732	-0.115455	0.06224	0.02885	-0.182515
YOR094W	-0.43276	-0.57035	-0.45212	-0.5462	-0.64543	-0.65779	-0.81485	-0.802235	-0.649795	-0.623305	-0.54778	-0.548825	-0.384215	-0.616765	-0.340945	-0.598485	-0.77245	-0.64512	-0.57248	-0.87364	-0.26098	-0.917275	-0.6937	-0.854145	-0.91336	-0.803215	-0.76565	-0.531085	-0.803535	-0.452645	0.040045	-0.862285	-0.84216	-0.50327	-0.68331	-0.82936	-0.7271	-0.742485	-1.08778	-0.813445	-0.559185	-1.53939	-0.57086	-0.53378	-0.59258	-0.744675	-0.95163	-0.99052	-0.864805
YDR167W	-0.74344	-0.59142	-0.63975	-0.59253	-0.54911	-0.61135	-0.84234	-0.763645	-0.485465	-0.569615	-0.34315	-0.463215	-0.641055	-0.392685	-0.738585	-0.745095	-0.99763	-0.5999	-1.12756	-1.12579	-0.40581	-0.789085	-0.4661	-0.796605	-0.65659	-0.637325	-1.03703	-0.435425	-1.05917	-0.509565	0.016185	-0.918585	-1.12254	-0.6487	-1.04848	-1.07355	-1.32258	-1.1424	-0.84477	-0.717505	-0.579035	-1.31308	-0.57356	-0.76386	-0.7958	-0.807375	-0.89736	-1.05706	-0.884795
YBR063C	-0.45893	-0.21427	-0.22883	-0.25289	-0.43367	-0.38508	-0.89184	-0.459525	-0.723795	-0.947995	-0.84144	-0.685395	-1.02859	-0.703105	-1.0104	-0.536045	-1.24979	-0.92241	-0.60798	-0.37202	-0.59388	-0.326505	-0.37462	-0.701485	-0.76255	-0.523425	-0.69534	-0.158285	-0.367875	-0.536485	-0.069395	-0.049015	-0.53423	0.02185	-0.49281	-0.54576	-0.7506	-0.369565	-0.86241	-0.982245	-1.12197	-0.73364	-1.06429	-0.45454	-0.35542	-0.563705	-0.66916	-0.67336	-0.595725
YER052C	0.75958	0.95179	0.87331	0.97391	0.99938	0.74113	-0.04669	-0.356725	-0.017635	-0.129345	0.02068	-0.117785	1.04581	1.27006	0.876575	0.615795	0.8463	0.75008	0.35737	0.4256	-0.51914	0.023385	0.39587	0.225115	-0.28239	-0.553775	0.17893	-0.051255	0.472245	0.778515	-1.58658	-0.150725	0.16129	0.52789	0.74003	0.72669	-0.45308	-0.388065	0.33604	-0.065905	-0.062495	1.22309	0.79849	1.38488	-0.17879	0.938905	0.6343	0.77032	0.619715
YPL118W	0.05161	0.06906	0.19112	0.18906	-0.00276	-0.06875	0.12596	0.083815	-0.024315	-0.274945	0.06925	-0.106025	0.036965	-0.118705	0.129385	0.037715	0.25037	-0.10846	-0.11477	0.16157	0.09654	0.082825	-0.0898	0.193905	-0.18599	0.235285	-0.65115	-0.380245	0.079815	-0.304725	0.060885	-0.163125	-0.15242	0.06381	0.11539	0.0158	-0.29891	0.077565	-0.07274	0.116255	-0.171935	-0.52091	-0.2784	-0.08997	-0.14389	-0.216445	-0.44323	-0.30159	-0.492175
YGR178C	-0.34773	-0.55258	-0.40647	-0.61277	-0.05699	-0.29849	-0.57634	-0.506645	-0.561205	-0.600145	-0.50952	-0.665625	-0.226205	-0.367745	-0.212235	-0.278235	-0.38987	-0.20451	-0.12882	-0.30257	0.06681	-0.285685	-0.39226	0.093115	-0.43883	-0.516245	-0.27709	-0.979785	-0.741125	-0.551495	-0.409115	-0.389385	-0.1774	-0.57138	-0.6538	-0.34533	-0.0079	-0.259565	-0.29047	-0.060475	-0.469275	-0.54373	-0.66543	-0.42557	-0.17795	-0.165035	-0.15107	-0.43763	0.022525
YPR187W	-1.34166	-1.53635	-1.61679	-1.55523	-1.16724	-1.45299	-2.15566	-2.40869	-1.85285	-2.02578	-2.05686	-1.94185	-1.37976	-1.80584	-1.49856	-1.28544	-1.65011	-1.84652	-1.63843	-1.97807	-1.77627	-1.83794	-1.57044	-1.4201	-1.67043	-1.54682	-2.28402	-1.83744	-1.98338	-1.66732	-1.18311	-1.96534	-1.91598	-1.80378	-1.82798	-1.74708	-1.71698	-1.97737	-1.64949	-1.35512	-1.92561	-2.24252	-1.78279	-1.81665	-1.54058	-2.334	-1.85055	-2.41157	-2.08758
YOL141W	-2.76291	-2.48249	-2.33831	-2.00539	-2.29843	-2.48355	-2.52546	-2.53369	-2.60858	-2.54873	-3.02392	-2.09391	-2.504	-2.67921	-2.68399	-1.74676	-2.62358	-2.43181	-2.46996	-2.03878	-2.89795	-1.96643	-2.55796	-2.37077	-2.23545	-2.02425	-2.32027	-2.26532	-2.35954	-1.76686	-2.62346	-2.22547	-3.22649	-2.28788	-2.70239	-1.85084	-1.82271	-1.75703	-2.22699	-2.5052	-1.91332	-1.7083	-2.32121	-2.00642	-2.1391	-2.20189	-2.54605	-2.26533	-2.59466
YJL065C	-0.21403	-0.44713	-0.21084	-0.58769	-0.37489	-0.41123	-0.38078	-0.851225	-0.572685	-0.673625	-0.3159	-0.365525	-0.395215	-0.657255	-0.452685	-0.228995	-0.54282	-0.25436	-0.41997	-0.68894	-0.51887	-0.703925	-0.2903	-0.618545	-0.57677	-0.386125	-0.81976	-0.302955	-0.576215	-0.279305	-0.500415	-0.678965	-0.61019	-0.50292	-0.39133	-0.46993	-0.60526	-0.799985	-0.58122	-0.639905	-0.469375	-0.64098	-0.62082	-0.70958	-0.53548	-0.440755	-0.25206	-0.47686	-0.567415
YPR086W	-0.48466	-0.51494	-0.40462	-0.46453	-0.31651	-0.43633	-0.59443	-0.987865	-0.377765	-0.651325	-0.56258	-0.687565	-0.284265	-0.654425	-0.355835	-0.499885	-0.43012	-0.66154	-0.46185	-0.25566	-0.20169	-0.856125	-0.45692	-0.443385	-0.45887	-0.258045	-0.52346	0.027715	-0.558685	-0.309945	-0.025575	-0.577815	-0.75994	-0.74245	-0.35238	-0.36719	-0.83929	-0.872155	-0.58612	-0.242685	-0.732425	-1.32874	-0.44946	-0.62268	-0.66454	-0.554405	-0.77056	-0.9627	-0.498465
YBR122C	0.03123	0.02142	0.15323	-0.10637	0.00691	-0.14928	-0.04491	-0.280855	-0.318345	-0.058585	0.02783	-0.175745	-0.172095	-0.282815	0.022025	-0.149925	-0.40124	-0.30344	0.23032	0.02081	0.13531	0.138585	-0.25369	0.078115	-0.20182	-0.198125	-0.47641	-0.112005	-0.056435	-0.320825	0.131005	-0.234605	0.18864	-0.05124	0.1151	-0.11256	-0.06562	0.074695	-0.30717	-0.097305	-0.380235	-0.56181	-0.12711	-0.3761	-0.02164	-0.246045	0.04111	-0.02337	-0.148465
YBR271W	-2.32825	-1.85171	-2.14132	-2.09249	-2.36455	-2.1798	-1.98788	-1.96993	-2.07658	-2.27026	-2.32844	-1.90169	-2.32491	-1.96948	-2.04411	-1.56029	-2.26623	-2.18566	-1.95929	-1.98735	-1.61399	-1.39651	-1.90815	-2.06174	-1.88433	-1.63941	-1.8439	-1.54001	-2.09171	-1.83159	-2.26959	-1.31466	-1.99152	-1.93832	-2.16435	-2.09143	-1.68082	-1.23751	-2.23577	-2.55963	-2.07519	-1.94757	-2.45811	-1.7833	-1.78893	-2.09599	-2.23423	-1.72177	-2.14821
YBR279W	0.32279	0.33463	0.06005	0.3193	-0.38526	0.35131	-0.44347	-0.400745	0.035845	-0.216235	0.11647	-0.197715	0.333285	-0.113995	0.009515	-0.347365	-0.10602	-0.32497	-0.69744	0.09106	0.00994	-0.349935	-0.26475	-0.387615	-0.11557	0.219565	-0.35365	-0.018015	0.136235	-0.122535	0.796245	-0.119855	0.02885	-0.21578	-0.11559	-0.06994	-0.79919	-0.418015	-0.40793	0.050415	-0.123555	-0.70585	-0.21773	-0.20472	-0.53841	-0.098165	-0.75221	-0.90005	-0.033565
YHR095W	-0.61287	0.65909	-0.36401	-0.81653	-0.94417	-0.32933	-0.47892	-0.716145	-0.052695	-0.545045	0.06441	-1.1521	-0.504405	-0.225895	-0.319665	0.029645	-0.11591	-0.033	0.47465	0.05605	0.11974	-0.033605	0.58493	0.324545	0.2044	-0.600095	-0.24753	-0.630555	0.791475	-0.366875	0.178345	-0.168925	-0.42794	-0.0176	-0.02884	-0.61602	0.02812	0.011315	0.33729	-0.387965	-0.327765	0.57394	0.54173	-0.33372	-0.13078	0.022015	0.64728	0.00058	0.211265
YMR221C	-0.89283	-0.71101	-0.74661	-0.71117	-1.06675	-1.22265	-0.54108	-0.314155	-0.334315	-0.789035	-0.52157	-0.588065	-1.18017	-1.14203	-1.02954	-0.719035	-0.93875	-0.8659	-1.04437	-1.32831	-1.06631	-0.779545	-0.90859	-1.20965	-0.40055	-0.951955	-0.43902	-0.569875	-0.731105	-0.422685	-1.53086	-1.0469	-0.49314	-0.50143	-0.94324	-1.06064	-0.59606	-0.668605	-0.66802	-1.15617	-0.564105	-0.13325	-0.3024	-0.34506	-0.9711	-0.635865	-0.85004	-1.09581	-0.957325
YJL221C	0.92614	1.12258	0.7969	0.91549	0.80754	1.0957	0.77802	0.958455	1.06947	1.15526	0.59743	0.818155	0.893935	1.59017	1.71091	1.64061	1.18725	1.678	1.17205	0.9761	0.62204	0.601015	0.7809	1.02384	0.55292	0.907845	0.33846	1.03266	0.686785	0.593725	0.933135	1.68636	1.1474	1.5788	1.03494	0.99484	0.88051	0.744345	0.57314	0.927545	0.414965	0.3564	0.34735	1.3126	0.34409	0.446785	0.39737	1.12876	0.440375
YDR241W	-0.45477	0.49412	-0.37757	-0.07799	-1.09295	-0.03904	-0.397	-0.287165	-0.259775	-0.668595	-0.21425	0.067875	-0.483795	0.052875	-0.274145	0.296805	-0.2192	-0.24705	-0.59546	0.36854	-0.23025	0.287315	0.0658	0.859465	-0.66126	0.487065	0.03455	0.522895	0.619365	0.791125	-0.388675	1.01113	0.61734	0.10532	-0.11287	0.33862	-0.76085	1.25724	-0.2818	0.376575	-0.357125	0.53393	-0.43883	1.19926	-0.28521	0.628305	-0.381	0.04239	-0.260445
YER130C	-0.23486	-0.49385	-0.08143	-0.10942	-0.44085	-0.20272	-0.40149	-0.070115	-0.344685	-0.250645	-0.20327	-0.312565	0.010635	-0.105615	-0.259635	-0.368625	-0.10161	-0.0835	-0.45316	-0.5748	-1.04417	-0.297865	-0.39978	-0.273295	-0.8574	-0.586715	-0.85556	-0.443775	-0.411755	0.237185	-0.508785	-0.636635	-0.56292	0.0334	0.05198	-0.32029	-0.90562	-0.774495	-0.71945	-0.538345	-0.992945	-0.56212	-0.56748	-0.56881	-0.82696	0.214085	-0.90446	-0.04215	-0.566105
YBR155W	-2.00312	-1.79157	-2.07621	-2.0253	-2.25213	-2.15236	-2.56978	-3.05053	-1.70667	-2.39668	-1.95935	-2.19218	-1.85586	-1.9988	-1.92353	-1.62748	-2.12649	-2.08255	-2.53117	-2.26224	-1.4785	-2.1426	-1.65912	-2.29834	-2.0504	-1.57991	-1.80308	-1.35207	-2.09787	-1.70551	-0.799765	-1.68037	-1.92486	-2.03709	-1.50994	-2.02544	-2.13512	-1.88653	-2.1253	-2.09945	-2.21569	-2.24168	-2.56771	-1.79562	-2.25548	-1.88641	-2.74276	-2.9302	-1.89322
YDR363W	-0.08821	0.12647	-0.33342	-0.22103	-0.22857	0.27125	-0.23324	-0.446725	-0.252965	0.182155	-0.00048	-0.281505	0.011875	-0.071535	-0.097185	-0.140295	-0.51225	-0.01781	-0.34828	0.09713	0.41483	0.207765	-0.17459	-0.006725	0.13103	0.344395	-0.31159	0.149955	-0.102765	-0.238845	0.495735	-0.153425	-0.09804	-0.07411	-0.20827	-0.16732	-0.32269	0.112635	-0.33078	0.148455	-0.529185	-0.38904	-0.4289	0.1483	0.0357	-0.019215	-0.34583	-0.00185	-0.113115
YPL147W	1.25648	1.5918	1.1584	1.3644	1.06428	1.66792	1.57074	1.69714	1.49013	2.04113	1.51261	1.36989	0.959325	1.18471	0.998245	1.54424	0.95229	1.12195	1.54862	1.34808	1.75507	1.83126	1.50899	1.38373	1.28528	1.45266	2.21706	2.54314	1.28313	0.969125	1.56737	2.64479	1.5334	1.7344	1.1911	1.49721	2.06003	2.15971	1.72782	1.71425	1.01867	0.73222	0.80849	1.25013	1.57614	0.888635	1.08764	1.88328	1.62139
YGR266W	-0.26111	-0.55668	-0.5171	-0.38559	-0.34466	-0.55804	0.38834	0.590505	0.267755	0.255725	0.33823	0.391705	-0.071635	0.113705	0.157975	-0.008155	0.06088	-0.13587	-0.12048	-0.22037	-0.11554	0.111625	-0.2232	-0.306995	-0.26454	-0.231275	-0.38595	-0.492105	0.309655	-0.226605	-0.458185	-0.135975	-0.19633	-0.3901	-0.63987	-0.32852	-0.00393	-0.235125	-0.20371	-0.582715	-0.256225	-0.37761	-0.12019	-0.33295	0.25659	0.155525	-0.50066	-0.42198	-0.259345
YLR443W	-0.36717	0.03086	-0.12647	-0.1076	-0.04013	-0.19345	0.14722	0.484025	0.265645	0.039795	0.28715	0.201215	-0.332525	-0.044845	-0.133875	0.077075	0.03622	0.08153	-0.21811	-0.49894	-0.29108	0.067415	-0.28427	-0.619145	0.14898	-0.196335	-0.00707	-0.080245	-0.439565	-0.220065	-0.844055	-0.446415	0.14431	-0.74624	-0.16097	-0.21705	-0.05016	-0.028275	-0.09469	-0.496315	-0.028675	0.36198	-0.3198	-0.00389	-0.22449	-0.354795	-0.02814	0.05707	-0.014485
YAL034C	1.74808	1.75075	1.98369	1.88903	1.92441	1.77508	2.19029	2.03482	1.64223	1.92552	1.72109	2.19909	0.833055	0.886755	1.52405	1.4947	1.12185	1.69305	1.71739	1.89129	1.98117	2.1222	1.52338	0.773915	1.91304	2.03914	2.63301	2.23643	2.06625	1.49602	1.97433	1.31086	1.64559	1.41314	1.75824	1.48912	2.31382	2.10719	1.34093	0.442505	2.31311	2.89664	2.35283	2.11376	2.44991	1.6138	2.29575	2.56662	2.02015
YBR067C	1.32554	1.48006	1.56246	1.85673	1.54413	0.66034	2.53278	2.41037	3.08759	2.77469	2.65888	2.58004	1.23344	1.22609	1.24947	1.96654	1.0993	2.643	2.40436	1.83081	1.21311	1.26862	3.17526	1.73958	2.84089	3.19915	2.93603	2.38872	2.16254	1.93163	2.77264	1.99395	1.59708	1.03548	3.01648	2.42973	2.76045	2.38187	2.91991	1.84554	2.78294	3.34676	2.25368	2.08001	3.01051	1.81617	2.37668	1.92733	2.69319
YCR095C	0.01187	0.30106	0.21923	0.34375	-0.23727	0.18492	-0.36481	-0.478395	-0.449725	-0.314715	-0.47084	-0.281465	-0.483885	-0.382995	-0.423325	-0.393485	-0.68428	-0.61842	-0.01006	0.19874	-0.55827	-0.092805	-0.15364	-0.216435	-0.43986	0.219455	-0.46944	0.079205	0.404115	0.124385	-0.014155	0.034485	-0.43215	-1.40885	-0.25631	-0.19888	-0.3738	-0.063405	-0.21224	-0.136295	-0.507645	-0.73954	-0.379	-0.05385	-0.20666	0.068405	-0.64481	-0.03655	-0.526365
YLR270W	2.68763	2.50762	2.7222	2.51547	2.81127	2.92614	2.77223	3.48149	2.56142	2.76357	2.62172	3.0053	2.39326	2.63876	2.70079	2.01815	2.8825	2.42443	3.10621	3.48272	2.42559	2.16248	2.26033	2.85446	2.08735	2.28755	2.11414	2.05981	2.60784	2.10189	2.74666	2.94081	2.71474	2.20104	3.35929	3.03735	2.87853	3.12941	2.20226	2.6755	2.41682	1.98882	2.22891	1.46224	2.60836	2.20384	2.54615	2.50826	2.52497
YPR084W	-0.00277	0.30563	0.20599	-0.09543	0.20954	0.03766	0.24937	0.228775	0.098495	0.220875	0.34837	0.327045	0.034835	-0.068575	0.067535	0.283985	0.09558	0.1682	0.29604	-0.07943	0.24261	0.309625	0.05924	-0.196575	0.44476	0.289125	0.0097	-0.092795	0.212555	-0.117245	-0.269575	0.119145	0.13547	0.19494	-0.14452	-0.00586	0.24152	0.081365	0.42498	-0.063985	0.243295	0.70424	0.03899	0.28154	0.11551	0.157325	0.27272	0.30877	0.202715
YBR184W	-0.01982	0.36533	0.07006	-0.0172	-0.31588	0.6958	-0.35535	0.031365	-0.403615	0.282585	-0.13816	0.068145	0.219855	0.155455	-0.221345	0.185995	-0.12274	0.09626	0.13449	0.68327	0.10589	0.161375	0.00642	0.838705	-0.55625	0.279255	-0.35538	0.156725	0.403905	0.297065	0.795655	0.640895	-0.00253	0.9329	0.4962	0.7116	-0.41643	0.243265	0.0227	0.616055	0.041545	-0.90191	-0.3232	-0.39625	0.08275	0.348955	0.12792	-0.01409	-0.130355
YMR113W	-0.2118	0.11743	0.03218	0.11961	0.24365	0.10981	-0.22673	0.065515	-0.634495	-0.324035	-0.31674	0.032985	-0.106135	0.305175	-0.105465	0.049665	-0.31679	-0.04264	0.39445	-0.13784	-0.36854	-0.275635	-0.03846	0.029075	-0.44053	-0.465075	-0.50442	-0.024865	-0.252535	-0.099305	-0.522815	-0.248085	-0.3711	-0.39083	-0.26502	-0.352	-0.39037	-0.286065	-0.00833	-0.081615	-0.399495	-0.40854	-0.53826	-0.29067	-0.43656	-0.351035	-0.4542	-0.28115	0.060495
YGR035C	-2.33025	-1.53071	-1.93901	-2.305	-1.94263	-2.15384	-2.22672	-2.73502	-2.37618	-2.35703	-2.83761	-2.11922	-3.54317	-3.84008	-3.48012	-2.72325	-3.68988	-3.57342	-1.64328	-2.40324	-1.93397	-2.08388	-1.87833	-2.44234	-1.58421	-1.63935	-1.30949	-1.8215	-2.83284	-2.1502	-1.17132	-1.02814	-1.9892	-1.54453	-2.07864	-2.00518	-2.0596	-2.65393	-2.08735	-2.1748	-1.54323	-1.42409	-1.6426	-1.97527	-2.11788	-2.79018	-2.21411	-1.67711	-2.95896
YDL222C	2.20056	2.70789	2.06211	2.54261	3.41522	3.54214	6.83978	7.14321	6.27281	6.89203	6.34211	6.53754	2.25063	3.4941	3.17387	3.02659	3.78205	3.73206	3.53278	3.24875	6.97979	5.91031	6.51936	4.02898	6.92892	5.85984	7.18516	5.80882	3.71879	3.90302	5.92798	4.34682	5.83806	4.27562	2.06084	2.49324	6.45813	6.05546	5.59957	3.78958	6.45967	7.68637	4.7203	3.6014	5.93746	3.9263	7.49191	6.6071	6.80004
YCL008C	0.97276	0.73074	1.02502	0.62999	0.96831	1.08578	0.59591	0.593065	0.115325	0.626625	0.36275	0.541465	0.538675	0.220455	0.583055	0.339155	0.50543	0.69924	0.95404	0.64247	0.43843	0.375835	0.50896	0.114525	0.8658	0.201255	0.90055	0.210615	0.790275	0.481465	0.142645	0.454135	0.81705	0.34567	0.76682	0.57879	0.92976	0.430495	0.93188	0.187355	0.703265	1.47039	0.86155	0.41191	0.94326	0.304955	0.82925	0.7368	0.852055
YEL065W	-1.77555	-1.83987	-1.87938	-1.53767	-1.86874	-1.56914	-1.26522	-1.78977	-1.70522	-1.5452	-0.67736	-1.48301	-0.347065	-0.930795	-0.383475	-2.69443	-0.28628	-0.34115	-2.52434	-3.37299	-1.99012	-1.86911	-2.03525	-2.3367	-1.93791	-1.91149	-2.7527	-2.8215	-2.38754	-1.95535	-3.08137	-2.16387	-1.94955	-1.77035	-2.2166	-2.53292	-2.28983	-2.34366	-1.58252	-2.06699	-2.37285	-1.2801	-2.32913	-1.2662	-3.18478	-2.03864	-2.07448	-2.83789	-3.17409
YNL335W	0.07125	-0.04662	0.35659	0.43361	0.46205	0.5371	0.80281	1.08031	0.508785	1.05777	0.7132	0.820685	0.514135	0.679255	0.320175	0.557215	0.45101	0.64011	0.20426	0.32659	0.60369	0.891335	0.5391	0.628755	0.40741	0.473635	0.56664	0.802465	0.545085	0.049965	0.080975	0.722915	0.8193	1.46826	0.25921	0.81936	0.60332	0.536825	0.5238	0.682875	0.489005	0.84662	0.6257	0.84365	0.56707	0.259115	0.4782	0.64658	0.407275
YMR296C	-0.55381	-0.70893	-0.64425	-0.57251	-0.37314	-0.72978	-0.47283	-0.795955	-0.545945	-0.723535	-0.36438	-0.669115	-0.416225	-0.750765	-0.596015	-0.492195	-0.56085	-0.42904	-0.87733	-1.46058	-0.80314	-0.574535	-0.57426	-0.849045	-0.05105	-0.469425	-0.23477	-0.754665	-1.13031	-0.514915	-1.24177	-1.10923	-0.62097	-0.55615	-0.8862	-1.13612	-0.46773	-0.881475	-0.38999	-0.815135	-0.616365	0.03489	-0.5153	-0.38495	-0.73751	-0.608935	-0.60195	-0.88647	-0.635945
YDR232W	-0.91908	-0.68713	-0.92996	-0.6762	-0.97847	-1.08684	-1.28573	-1.17196	-0.834615	-1.1701	-1.10622	-1.22401	-0.704035	-0.908865	-0.846885	-0.513435	-0.73867	-0.87973	-0.76866	-0.84417	-1.34277	-0.989695	-0.69476	-0.880095	-0.17756	-0.645305	-0.68358	-1.12847	-0.676515	-0.925885	-1.64176	-1.13946	-0.77973	-0.56032	-0.8218	-1.04142	-0.5152	-0.668045	-0.6303	-0.984615	-0.804465	-0.18056	-0.73797	-0.39791	-1.12872	-1.1196	-0.73406	-1.34069	-0.892715
YGR190C	-0.02165	0.82434	-0.2555	0.40372	0.44552	-0.23244	0.36855	1.04804	0.568735	0.484775	-0.06448	-0.241535	0.035925	0.355605	0.777475	1.27977	0.31631	1.19835	0.68906	0.50136	-0.4853	0.721605	1.20371	0.933545	1.44883	0.854835	0.79244	0.898935	1.53173	-0.208675	0.136335	1.25544	0.75814	0.06995	0.84563	0.87318	0.68368	1.26947	1.11215	0.805995	1.11495	0.71292	1.01042	0.31547	1.75745	1.08607	1.25924	0.40371	0.534085
YHR116W	1.26156	1.18865	1.36218	0.94682	1.28882	1.28197	0.9285	0.721245	1.02663	0.631075	1.05408	0.911655	0.763255	0.608885	0.633645	0.741655	0.68199	0.64972	1.21386	1.073	1.00245	0.963045	0.46412	0.915845	1.1228	0.928595	0.70369	0.954305	1.15386	0.840915	0.983445	0.919295	0.65179	0.56677	1.47335	1.3065	1.16533	0.790545	0.82921	1.14003	0.521965	0.55964	0.80984	0.46235	0.84627	0.967215	0.85191	0.89076	0.903105
YDR313C	0.53595	0.60858	0.72108	0.64919	0.6009	0.35548	0.69448	0.393525	0.251505	0.772505	0.60897	0.688025	0.342315	0.086575	0.231355	0.457025	0.03517	0.43148	0.74963	0.4292	0.1544	0.278895	0.18277	0.014965	0.78103	0.418785	0.46638	0.243875	1.16702	0.141665	0.300055	0.477355	0.40907	0.38526	0.67667	0.24853	0.46473	0.393475	0.36734	0.057905	0.687695	0.57233	0.80325	0.20621	0.18894	0.101125	0.68	0.56179	0.254555
YFR018C	-0.425	-0.31632	-0.62148	-0.30641	-0.2995	-0.60283	-0.31548	0.034055	-0.128025	-0.259095	0.02792	-0.336905	-0.743945	-0.689515	-0.847815	-0.730185	-0.42722	-0.82803	-1.0037	-1.43809	-0.35071	-0.924615	-0.28586	-0.855645	0.22753	-0.687555	-0.28632	-1.19422	-1.05263	0.012435	-1.49181	-1.26761	-0.30421	-0.40077	-0.75149	-1.16379	-0.03193	-0.643305	0.13434	-0.219145	-0.478915	0.3658	-0.04804	-0.41146	-1.0057	-0.363235	0.06448	-0.51242	-0.154335
YKL007W	1.14394	0.77538	0.99085	1.01225	0.7311	1.08944	1.17362	1.20151	1.06676	1.27256	1.30553	1.19712	1.13556	1.12357	1.32225	0.719185	1.20023	1.14868	1.00284	1.19177	0.8373	0.332885	0.49171	1.1177	0.56671	0.595765	0.32561	0.718515	0.963905	0.714645	1.61799	1.24416	0.86491	0.72776	1.16217	1.07035	0.54064	0.836345	0.5942	0.880465	0.784775	0.07292	0.67629	-0.01968	1.19354	0.721215	0.9332	0.76972	0.889105
YIL048W	0.70325	0.72425	0.6455	0.7598	0.49454	0.64334	0.81271	1.10032	0.648115	0.496555	0.47749	0.579595	0.280385	0.560725	0.469915	0.492765	0.57794	0.50783	0.1857	0.22488	0.23465	0.432785	0.52376	0.215285	0.57306	0.182955	0.59299	0.326785	0.451835	0.515175	-0.119555	0.304485	0.1644	0.22678	0.27785	0.41053	0.53994	0.834485	0.4096	0.233205	0.839725	0.82482	0.32412	0.57103	0.46158	0.465715	0.76484	0.85313	0.724285
YDL213C	-2.75502	-2.4305	-2.62594	-2.50372	-2.98722	-2.88081	-2.90312	-4.24543	-1.8275	-2.8525	-2.43199	-2.82842	-2.4535	-3.2864	-2.74046	-2.02174	-3.42415	-3.10443	-2.77019	-2.80728	-2.34043	-2.81962	-1.65998	-2.51316	-2.27133	-1.68325	-2.8925	-2.35995	-2.41936	-2.2982	-1.03151	-2.34063	-2.38571	-2.19999	-2.31292	-2.26424	-3.12658	-2.87145	-2.22129	-2.81033	-2.70016	-2.76006	-2.3839	-1.38925	-3.02989	-2.36538	-3.86456	-3.62559	-2.68356
YDR443C	0.08909	-0.06454	-0.06027	-0.24327	-0.00426	0.07697	0.16016	-0.067155	-0.034635	0.053385	-0.1388	0.108865	0.227055	0.172195	0.168115	0.284605	0.0697	0.16128	0.19371	-0.00698	0.19259	0.111125	-0.12291	0.278775	-0.30236	-0.285905	0.10669	-0.636125	-0.412285	-0.510275	-0.086355	-0.015545	0.30603	0.17962	-0.41425	-0.13135	0.25171	-0.154195	-0.20077	0.081895	-0.119815	-0.01073	-0.17338	-0.10677	-0.01879	-0.092395	-0.02955	-0.05011	0.233335
YNL292W	-1.153	-1.18356	-1.10698	-1.39837	-1.21228	-1.4544	-1.70524	-1.59851	-1.17144	-1.5822	-1.36154	-1.26309	-0.898125	-1.09022	-1.20156	-1.0374	-1.274	-1.17522	-1.49633	-1.71451	-1.04911	-1.25162	-0.87925	-1.35698	-1.43819	-1.0535	-1.41024	-1.14061	-1.37728	-1.11797	-0.890635	-1.41282	-1.5237	-1.14975	-1.37383	-1.54127	-1.57051	-1.29537	-1.16945	-1.39742	-1.43261	-1.59024	-1.48787	-1.00743	-1.30385	-1.31925	-1.46751	-1.76281	-1.46856
YKL183C-A	0.24604	0.10116	0.39726	0.35297	-0.14245	-0.56709	-0.36126	-0.540715	-0.066515	0.457395	-0.08128	-0.343105	-1.14299	-0.316225	-0.183255	0.293505	-0.31132	-0.107	0.11792	0.60346	0.15623	0.721045	0.16872	0.910655	0.68447	1.46375	-0.40194	0.865285	0.623395	0.486825	-0.601435	0.326665	-0.58069	1.32562	-0.33899	0.00487	-0.03215	0.238065	-0.29328	0.283385	0.843555	0.64202	0.20378	1.42438	0.15034	1.40663	0.55804	0.71611	-0.536785
YOR324C	-0.25198	-0.35624	-0.30232	-0.41286	-0.43753	-0.42177	-0.93592	-0.418265	-0.378745	-0.547105	-0.77464	-0.794655	-0.751425	-0.633475	-0.742445	-0.342235	-0.67542	-0.60152	-0.26416	-0.42264	-0.73865	-0.566955	-0.51333	-0.761125	-0.31183	-0.529425	-0.16947	-0.138275	-0.002615	-0.188725	-1.41168	-0.557165	-0.44392	-0.85838	-0.17024	-0.37892	-0.32698	-0.217235	-0.60027	-0.606995	-0.442965	-0.0037	-0.45723	-0.1478	-0.44379	-0.411005	-0.4239	-0.29344	-0.325165
YKL100C	0.66829	0.83431	0.87334	1.01274	0.87333	0.96893	1.39389	1.75419	1.26649	1.31646	1.41148	1.36779	0.713325	0.896195	0.941825	0.945995	1.20825	1.28994	0.56447	0.5419	0.98187	1.24453	0.98805	0.701485	1.15828	0.909515	1.21427	0.798595	0.696745	1.1488	0.418135	0.895615	0.75666	0.36559	0.49232	0.46308	0.96638	1.01016	1.09396	0.603865	0.963965	1.2832	0.68565	1.07109	0.66788	0.976505	1.16037	1.15377	0.757965
YNL134C	1.80432	1.86129	2.12036	1.73229	2.32661	1.88832	3.86632	3.45967	3.45213	3.52589	3.44036	3.74506	3.38657	3.62614	3.5638	2.82245	3.36286	3.66054	3.88322	3.48407	2.96036	2.63722	2.75213	2.88775	3.40129	2.96352	2.57481	1.67833	2.59131	2.45427	2.65874	2.92492	3.52003	2.80252	3.44308	3.18951	3.60473	2.87771	2.77231	2.88115	3.48816	2.99489	2.37737	1.68167	2.35792	2.54793	3.10776	3.86231	2.62027
YOR192C-B	2.49162	2.61215	2.42197	2.31775	2.40979	2.55062	3.54383	3.50448	3.73283	3.48589	3.27252	3.32411	0.776695	0.884005	0.785965	0.784925	0.34308	0.93811	2.04021	2.56993	2.49604	1.6423	0.88435	1.63119	1.30854	1.60166	1.86289	2.60783	1.31679	3.81462	2.51236	2.07599	1.28695	1.2401	2.18708	1.8314	0.99392	1.18502	0.72129	1.58927	2.06052	1.47256	1.24452	2.69676	3.82008	4.14761	3.41649	2.54204	3.2635
YPL021W	-0.03872	-0.42926	-0.18365	-0.01264	0.06665	-0.32526	0.22315	0.059595	0.580975	0.355925	-0.06982	0.401355	0.562285	-0.104205	-0.827625	0.189015	0.10911	0.4644	0.9628	0.67304	0.3162	0.683515	1.02206	0.431875	0.28433	0.488185	0.89149	0.422365	0.382685	-0.261985	0.286145	0.295445	0.63399	-0.27602	0.15947	0.55649	1.15127	0.280395	0.53627	0.271865	0.444545	0.86246	-0.08695	0.82828	0.46581	0.030805	0.68165	0.3936	0.479845
YIL146C	0.25654	0.31767	0.38081	0.28513	0.44649	0.27617	0.27735	0.256405	0.120015	0.239465	-0.03669	0.007345	0.113755	0.319505	0.345435	0.329125	0.13818	0.42116	0.37803	0.27326	0.35767	0.544485	-0.13417	-0.472645	0.42662	-0.073455	0.4749	-0.056285	0.460405	0.282515	-0.571205	-0.366695	0.00728	-0.15952	-0.73886	-0.49765	0.38577	-0.209905	0.23366	0.117435	0.823755	1.21392	0.04841	-0.07888	-0.04055	0.132155	0.58893	0.88105	0.053325
YIL171W	2.00066	-0.35292	0.12771	-0.00251	0.56789	-0.4132	0.35046	0.406265	-0.730025	-0.033925	0.6036	-0.331865	0.598925	0.437045	0.243535	0.187225	0.20025	-0.71752	0.62169	-0.22314	2.09375	-0.026905	2.27098	-1.56452	1.22169	0.133135	1.83793	0.232345	2.04149	0.585855	0.904855	-0.330855	1.75779	1.76825	1.98237	-0.16336	1.59357	-0.561345	1.61335	-2.15672	0.834765	0.62938	1.87884	0.82978	1.48195	0.588155	0.56561	0.37671	1.14183
YNL218W	0.16687	0.19713	0.24128	0.11662	-0.0796	-0.08746	0.26704	0.407225	0.184735	0.342925	-0.05615	0.420035	0.330925	0.523765	0.454635	0.186545	0.30849	0.52464	0.06245	0.13941	-0.38772	-0.091155	0.0335	0.085095	-0.42868	-0.100395	0.1176	0.297695	0.173965	0.261785	0.338865	0.222025	-0.32296	0.42461	0.33683	0.34742	-0.48933	0.040295	-0.17033	0.057785	-0.196895	-0.25185	0.19646	0.46924	-0.13516	0.239035	-0.22071	0.14393	0.048295
YIL121W	0.94712	0.9283	1.12469	0.7922	1.14101	0.86926	1.87922	1.75364	1.87665	2.25415	1.22011	1.67511	0.981335	1.09184	0.484155	1.9751	0.63145	1.51721	1.22514	1.03631	2.15603	1.88491	0.95582	1.20749	2.64148	1.5111	2.36239	2.47783	1.91606	1.88454	1.03621	1.27395	0.95666	0.80312	1.98163	1.77481	1.3618	1.00636	1.15103	1.4186	1.64596	1.69784	2.893	2.78399	1.40715	1.55231	1.80145	0.92899	2.36318
YDL167C	-2.67548	-2.63007	-2.74599	-2.74931	-2.61291	-2.61176	-2.57053	-2.68887	-2.43621	-2.79015	-2.96546	-2.38957	-1.95562	-2.09191	-2.21998	-1.81405	-2.31864	-2.11242	-2.02601	-3.00376	-2.91993	-2.7512	-2.32642	-2.08128	-2.83274	-2.75724	-2.97806	-3.02535	-2.9482	-2.07059	-2.7277	-2.15129	-2.32123	-1.74017	-2.76478	-2.49197	-2.15965	-2.52664	-2.64746	-2.63318	-2.64875	-2.38856	-2.97216	-2.03223	-2.78481	-2.88028	-3.14224	-3.53642	-2.46547
YNL228W	0.05816	0.69561	0.10312	0.14016	0.26662	0.1408	0.25529	0.215125	0.467985	0.154485	0.39101	-0.093215	-0.136675	0.415575	0.101825	-0.030755	0.36378	0.46424	0.83735	0.078	0.43609	-0.036815	0.67079	0.673145	0.3425	0.872065	0.53855	0.249885	0.752315	0.647915	0.747085	0.569745	1.88198	0.4715	0.27691	0.19992	1.02663	0.703435	0.83278	0.177465	0.198215	0.0625	1.04469	0.31785	0.21054	-0.008925	0.41694	-0.02507	0.774105
YPL214C	0.13235	-0.10495	0.11387	-0.00588	0.45806	0.03431	0.31515	0.268075	-0.013525	0.169295	0.05142	0.136535	-0.043125	-0.056485	-0.089955	-0.408865	-0.08826	0.10335	0.3629	-0.18287	-0.05068	-0.169325	0.04388	0.130095	0.05868	-0.349145	0.10121	0.158855	-0.334285	-0.127615	-0.019215	0.023385	0.14103	-0.07599	0.20192	-0.2319	0.14709	-0.281915	-0.04037	0.029885	0.110455	0.28429	-0.26967	-0.53866	-0.08253	-0.386865	0.10056	0.267	-0.023795
YOR228C	1.48956	1.44788	1.44398	1.66926	1.44991	1.3281	1.80312	2.00893	1.90287	1.86919	1.72024	1.72321	0.735725	1.14663	1.13725	1.18929	1.29051	1.48277	1.35654	1.2341	1.05043	1.23595	1.58103	0.770995	2.23483	1.39061	1.96154	1.70568	1.21571	1.44903	0.969355	1.50364	1.18995	1.18908	1.76571	1.46757	1.52983	1.39878	1.82018	1.07286	1.55614	2.12913	1.75111	1.16358	1.49473	1.24369	1.72168	1.83485	1.51662
YBR270C	0.82696	1.01814	0.6936	0.56424	0.70011	0.74172	0.44089	0.479215	0.231225	0.559075	0.18078	0.235275	0.424795	0.586385	0.323355	0.363475	0.4398	0.73103	0.76059	0.55874	0.77141	0.923285	0.74276	0.296655	0.31386	0.552445	0.51879	0.994095	0.500905	-0.028985	0.478955	0.297885	0.28699	0.60948	0.11665	0.27125	0.27794	0.181605	0.41786	0.190865	0.187255	0.59801	0.09764	0.32688	0.60863	0.308195	0.25003	0.82957	0.606305
YEL063C	-0.07135	0.1105	0.04615	-0.00346	0.18395	-0.02003	-0.21234	-0.329845	-0.129635	-0.600285	-0.10354	-0.332025	-0.203425	-0.370375	-0.316255	0.053225	-0.26496	-0.13173	-0.48977	-0.94286	-0.57359	-0.133335	-0.01275	-0.531815	0.11526	-0.210895	-0.03166	-0.120665	-0.172435	-0.167875	-0.830035	-0.463445	-0.05754	-0.08289	-0.43243	-0.54533	-0.11858	-0.193205	-0.15378	-0.863825	-0.088515	0.48009	-0.10731	0.13576	-0.0974	-0.239535	0.13057	-0.19934	-0.088245
YGR222W	0.7371	0.29396	0.69985	0.54912	0.88301	0.77129	0.62239	1.07414	0.583935	0.781335	0.81797	0.720765	0.732785	0.676395	0.872985	0.703155	0.59	1.06732	0.67119	0.45204	0.36417	0.256775	0.18336	0.579005	-0.11753	0.211655	0.15641	0.711225	0.402215	0.197035	0.878825	0.407495	0.30327	-0.13573	0.28478	0.48872	-0.05765	0.154525	-0.333	0.754365	0.206675	-0.10757	0.36925	0.11667	0.81441	0.227115	0.69736	0.60832	0.331335
YAL068W-A	0.1327	0.26795	0.27484	0.76351	-0.28963	0.11487	-0.26755	0.458145	0.204085	-0.091585	-0.13998	0.472575	0.646895	-0.013685	-0.438705	-0.206245	0.42096	-0.70414	-0.08447	0.8113	0.426	0.788855	0.52526	0.510225	0.52701	1.08346	0.38561	0.585925	1.14142	0.387465	0.229095	0.802855	-0.17082	0.18837	-0.10977	0.65903	0.68902	0.358785	0.45511	0.628635	0.388635	1.29267	0.50362	0.86467	0.44403	0.720855	0.49779	0.17917	0.361345
YML020W	-0.17345	-0.01544	-0.11405	-0.05341	-0.09295	0.36652	-0.01743	0.412305	0.014915	0.080495	-0.14497	-0.047585	0.141795	0.367255	0.126855	0.448895	0.26713	0.41139	0.12255	0.17905	0.20309	0.179155	0.24671	0.409515	-0.17473	0.309515	0.2241	0.009725	-0.239145	0.019955	0.051165	0.154775	-0.08058	-0.15322	-0.1309	0.05873	-0.20068	0.245835	0.14103	0.156225	-0.400785	-0.04616	-0.28454	0.14342	0.00334	0.087925	-0.17217	0.12015	0.116285
YGR121C	0.51716	0.41921	0.71225	0.87118	0.16703	0.31766	-0.42152	-0.549015	-0.292525	-0.762395	-0.39001	-0.405615	-2.17046	-2.05816	-1.96467	-1.85347	-1.68702	-1.80298	0.54804	0.19677	-0.38783	-0.166345	-0.1708	-1.29672	0.25272	-0.361905	0.25873	0.550225	0.803815	0.479805	-1.04197	-0.027405	0.38344	0.73084	0.84123	0.11904	-0.10308	-0.428855	0.12365	-0.536015	-0.015565	0.74036	0.12456	0.73563	-0.30466	0.056705	-0.54343	-0.51897	-0.062515
YDL095W	-0.23413	-0.0154	-0.27938	-0.14823	0.01574	-0.1891	0.22107	0.291195	0.472275	-0.097935	0.25895	0.115755	0.284515	0.204215	0.057865	0.154345	0.46517	0.21516	-0.11184	-0.37458	-0.10136	-0.334245	0.04207	-0.121465	0.01544	-0.480265	0.26413	-0.052255	-0.338405	0.191885	-0.442965	-0.055575	0.10422	-0.02532	0.11243	-0.13851	-0.05015	-0.246745	0.40079	0.062195	-0.165165	0.36592	-0.08221	0.37977	-0.41975	0.165875	0.11541	-0.28509	0.275235
YBR222C	0.0935	0.11403	0.21012	0.1192	0.6043	0.05556	0.76589	0.652785	0.804955	0.532625	1.01316	0.480625	0.369785	0.146755	0.325535	0.490415	0.63647	0.70121	0.53466	0.13657	0.55122	0.529415	0.29807	0.341965	1.25601	0.447875	0.89514	0.286405	0.138215	0.475025	0.077885	0.586795	0.23516	-0.03295	0.84867	0.45198	0.36819	-0.072305	0.68255	0.766495	0.300185	0.76778	0.37693	0.21874	0.38312	0.616405	0.67709	0.13785	0.547945
YDL003W	-1.40767	-1.24866	-1.41342	-1.27548	-1.70641	-1.55884	-1.59707	-1.99482	-1.74733	-1.69402	-1.59134	-1.56544	-0.614235	-0.856555	-0.991785	-0.977205	-1.08744	-1.33131	-1.13909	-1.23465	-1.37134	-1.33109	-1.00367	-1.05997	-2.30553	-1.01381	-2.19967	-1.28666	-1.24561	-1.37311	-0.545275	-1.19281	-1.69792	-1.31911	-1.0055	-1.18871	-2.20138	-1.91301	-1.32244	-0.857895	-1.78272	-2.18191	-1.7304	-1.47318	-1.6265	-1.83377	-2.14679	-2.35838	-2.24701
YOR323C	-0.58119	-0.82761	-0.77045	-0.80245	-0.38022	-0.62626	-0.63221	-0.763575	-1.06329	-0.712345	-0.98441	-0.596005	-0.437095	-0.441635	-0.543435	-0.575005	-0.57603	-0.59015	-0.37941	-0.43733	-0.64036	-0.667785	-0.94183	-0.593765	-0.93309	-0.927945	-1.229	-1.03941	-0.772085	-0.916325	-0.947505	-0.794565	-1.0067	-0.56892	-0.79001	-0.59639	-1.00427	-0.995285	-0.84723	-0.737625	-1.01092	-1.31436	-0.72633	-0.72136	-0.95603	-0.948375	-0.98467	-0.97378	-0.972505
YMR183C	-0.4572	-0.59959	-0.31182	-0.66697	-0.61605	-0.71666	-0.71285	-1.14725	-0.526795	-0.382375	-0.56825	-0.575225	-0.399365	-1.14264	-0.510135	-0.727425	-0.80612	-0.98805	-0.35804	-0.28042	0.0978	-0.535955	-0.41888	-0.541255	-0.88335	-0.492035	-0.74552	-0.681165	-0.213915	-0.465445	0.278225	-0.798315	-0.27289	-0.33076	-0.6972	-0.70451	-0.71409	-0.653575	-0.63144	-0.364755	-0.808835	-1.06074	-0.81864	-0.85667	-0.68703	-0.429975	-0.83959	-0.88419	-0.569605
YOR274W	-0.88879	-0.42	-0.72832	-0.75401	-0.7668	-0.71167	-1.58953	-1.29835	-1.27347	-1.24734	-1.46578	-1.22249	-1.46307	-1.2912	-1.3355	-1.1245	-1.65091	-1.68893	-1.30635	-0.91861	-0.69195	-0.852905	-1.27744	-1.11017	-1.23333	-0.688125	-1.25364	-0.636255	-0.646975	-0.679225	-0.903155	-0.895745	-1.07905	-0.30784	-0.92818	-1.1081	-1.16764	-0.949205	-1.30038	-1.09352	-1.07849	-1.23404	-1.14094	-0.48783	-1.1026	-1.01767	-1.40554	-0.67033	-1.1401
YER146W	0.28622	0.00117	-0.0754	0.06364	0.43186	-0.12183	-0.44946	-1.0811	-0.345895	-0.647205	-0.16888	-0.483035	-0.420545	-0.696735	-0.520375	-0.376445	-0.50607	-0.33876	-0.05052	-0.42155	-0.35325	-0.728445	-0.40318	-0.724805	-0.66337	-0.330675	-0.63718	-0.004385	-0.563925	-0.000285	0.260415	-0.715465	-0.72503	-0.61311	-0.08906	-0.40308	-0.63809	-0.615455	-0.57456	-0.587215	-0.604215	-0.81472	-0.48578	-0.73457	-0.16081	-0.211545	-0.24601	-0.71782	-0.450845
YML075C	-1.09428	-0.93149	-0.9548	-0.81676	-0.81736	-1.07703	-0.83912	-0.430815	-0.559815	-1.10574	-0.77516	-0.890295	-1.8077	-1.64695	-1.73009	-1.45934	-1.47032	-1.76596	-1.2632	-1.69003	-1.515	-0.757055	-1.10392	-1.60085	-0.80942	-1.2773	0.05554	-0.244525	0.133035	-0.385895	-1.74236	-1.21131	-1.58405	-1.42734	-1.23224	-1.39182	-1.16579	-1.08319	-1.0984	-1.64068	-1.27456	-0.69595	-0.25286	-0.33462	-0.706	-0.424525	-1.28007	-1.4473	-1.15278
YOL035C	-0.17542	0.85884	0.12335	0.63427	0.37556	0.21587	0.44041	0.114195	0.132005	-0.024175	0.27256	-0.399575	0.313465	0.536975	0.227505	0.446895	0.23709	0.35372	0.12487	0.43356	0.47465	0.594805	0.7159	0.351225	0.71543	0.710035	0.67718	1.06266	0.524595	0.874595	-0.113555	0.639375	0.6402	0.8081	0.39618	0.8495	0.88537	0.916495	0.51021	0.363395	0.437405	0.32886	0.73646	0.49235	0.39944	0.365985	0.76211	0.66932	0.604895
YPL063W	-0.44526	-0.58483	-0.63225	-0.67895	-0.35643	-0.42376	-1.03241	-1.34123	-0.999145	-0.921665	-0.94993	-1.06408	-0.410235	-0.571515	-0.551365	-0.442325	-0.58954	-0.36152	-0.1943	-0.60228	-0.4556	-0.738625	-0.5574	-0.193515	-0.70853	-0.637225	-1.49377	-1.57018	-0.732655	-0.765015	-1.25259	-0.744255	-0.596	-0.33192	-0.9108	-0.50853	-0.54322	-0.546735	-0.59839	-0.443505	-1.15589	-1.20909	-0.86168	-0.54232	-1.05228	-0.770045	-1.00542	-1.14354	-1.05855
YDR457W	-0.50737	-0.63528	-0.64908	-0.55706	-0.5061	-0.55541	-0.28267	-0.213585	-0.424685	-0.419075	-0.61704	-0.236345	-0.362025	-0.099625	-0.191075	-0.147625	-0.03963	-0.0843	-0.41122	-0.47147	-0.52115	-0.406025	-0.64803	-0.453245	-0.57127	-0.621775	-0.42512	-0.993065	-0.707255	-0.768625	-1.00412	-0.502085	-0.24414	-0.24686	-0.66967	-0.52534	-0.31719	-0.454425	-0.29839	-0.502285	-0.506785	-0.47717	-0.75453	-0.40083	-0.76061	-0.621975	-0.46617	-0.49724	-0.382305
YLR273C	0.31609	0.59699	0.55767	0.48457	0.54115	1.07544	1.04429	1.30384	0.559375	1.30941	0.93221	1.0714	1.47517	1.87821	1.57994	1.93792	1.60569	2.0303	0.85035	0.69123	0.65005	1.16301	0.78279	1.21866	0.80308	0.947165	0.66874	0.992725	-0.080545	0.016175	1.04391	1.83825	0.39599	0.4744	0.12014	1.22143	0.71834	0.922475	1.0026	1.21229	1.04238	1.10049	0.33182	0.60531	0.48294	0.491225	0.76347	0.99235	0.790675
YDR181C	-0.09671	-0.07205	-0.4133	-0.11139	-0.24564	0.00789	-0.48407	-0.850825	-0.266975	-0.109545	-0.06671	-0.472175	-0.009055	-0.373635	-0.231755	-0.090285	-0.54805	-0.42322	-0.60181	-0.20384	0.14365	-0.398035	-0.25913	-0.166845	-0.36488	0.074105	-0.39906	-0.204525	-0.619985	-0.178005	0.947555	-0.417105	-0.25271	0.22036	-0.58063	-0.19018	-0.89448	-0.276865	-0.45092	0.216755	-0.128035	-1.05074	-0.37054	-0.27264	-0.28655	-0.140045	-0.57562	-0.86371	-0.375285
YGL097W	-1.21593	-1.22736	-1.17538	-1.24349	-1.15296	-1.58811	-1.11447	-1.14433	-1.17409	-1.26568	-0.88586	-1.00798	-0.803065	-0.948035	-0.828255	-0.740745	-0.67299	-0.72517	-1.12919	-1.52816	-1.07116	-0.927725	-0.78409	-0.860495	-1.14205	-1.15629	-1.03004	-1.05636	-1.44125	-0.999945	-1.02205	-1.11485	-1.29766	-0.88132	-1.2536	-1.35085	-1.06125	-1.20137	-0.82174	-1.08935	-1.12373	-1.18779	-1.24277	-0.82765	-1.42924	-1.14453	-0.87509	-1.62233	-1.23269
YCL056C	-0.05014	-0.25593	-0.30716	-0.28294	-0.07087	-0.35276	-0.22568	-0.243905	-0.052035	-0.149655	0.10234	-0.206675	-0.445265	-0.490375	-0.371885	-0.524085	-0.45785	-0.53102	-0.6405	-0.50947	-0.10905	-0.550445	-0.26168	-0.282805	-0.19624	-0.178615	0.0523	0.385975	-0.671765	-0.043485	0.627205	-0.220395	-0.65194	-0.07459	-0.07276	-0.29515	-0.46158	-0.501895	-0.36999	-0.345715	-0.116895	-0.6484	-0.23376	0.14486	-0.11861	-0.194425	0.18987	-0.22756	-0.048985
YJL083W	0.54461	0.48002	0.56522	0.27864	0.48577	0.48823	0.64365	0.655765	0.553175	0.671625	0.60468	0.594515	0.130745	-0.010335	0.259385	0.296455	0.36429	0.27545	0.86878	0.59842	0.3849	0.598225	0.64268	0.176085	0.77745	0.608435	1.04565	0.362565	1.14133	0.333565	0.196995	0.680655	0.68628	0.79105	0.58454	0.34869	0.79276	0.696445	0.90505	0.134875	0.816365	1.55612	1.24313	0.60695	0.68983	0.600335	1.1113	1.10055	0.850155
YMR242W-A	0.42214	-0.64778	0.52813	-0.00534	-0.26322	-0.06562	-0.04352	-0.136035	0.738375	0.625745	0.08187	-0.630915	0.599985	-0.256715	-0.371025	0.841315	0.10891	0.1925	0.37363	0.47582	0.20969	0.306955	1.28354	0.732825	-0.15776	0.584725	-0.18267	1.02605	-0.150825	0.860485	-0.641345	-0.379855	1.71567	-0.06668	-0.37936	1.02732	0.35653	0.506935	0.86145	-0.100035	1.26263	2.38125	-0.53573	0.17337	0.19054	0.353445	-0.34451	0.0843	0.934465
YOR026W	-1.31746	-1.45944	-0.97581	-1.20186	-0.89187	-0.97291	-0.70051	-0.898245	-0.952215	-0.716265	-0.79708	-0.650275	-0.485965	-0.382945	-0.658515	-0.318485	-0.6898	-0.40569	-0.49227	-0.93099	-1.06998	-0.888295	-0.79382	-0.460425	-1.29195	-1.24691	-0.9043	-0.930105	-0.900995	-1.18758	-0.798515	-0.817615	-0.76739	-0.5283	-0.80812	-0.78213	-0.71244	-0.669905	-0.96369	-0.961605	-0.874305	-0.80153	-1.1978	-0.63982	-0.82161	-1.21833	-1.29664	-1.06426	-1.14461
YPL140C	0.26701	-0.02178	0.12104	0.21263	0.4268	0.25961	0.44879	0.663655	0.553385	0.634065	0.65331	0.601425	0.386515	0.661535	0.577995	0.581455	0.43132	0.30579	0.46184	0.26141	0.50872	0.739925	0.32195	0.442845	0.56456	0.592805	0.08136	0.091485	-0.160215	-0.169815	0.499495	0.364085	0.51029	0.19945	-0.2617	0.01171	0.45271	0.536875	0.25247	0.598285	0.465985	0.35581	0.09537	0.24703	0.53559	0.107075	0.35196	0.57281	0.250005
YNR016C	-1.50722	-1.57489	-1.39893	-1.24884	-1.47969	-1.59324	-1.01377	-0.833425	-1.0071	-1.28157	-1.29042	-1.18494	-0.822515	-0.559895	-0.745145	-0.608575	-0.41307	-1.00063	-1.21713	-1.3132	-1.46199	-1.26609	-1.02976	-0.649415	-0.8611	-1.27075	-1.20411	-1.35577	-0.891995	-1.31635	-1.95873	-1.50526	-1.30281	-1.35772	-1.26495	-1.25525	-0.95036	-1.0634	-0.84896	-0.922475	-1.67383	-0.93194	-1.25231	-1.0233	-1.85662	-1.48426	-1.22811	-1.86639	-1.5133
YER123W	0.3277	0.15312	-0.06098	0.13857	0.22886	0.56268	-0.14881	0.373055	0.100665	-0.020845	-0.25109	-0.054855	0.310285	0.237605	0.157565	0.163735	0.19125	-0.05737	0.22389	0.34285	-0.04122	0.289115	0.11588	0.151535	-0.22751	0.014965	-0.2047	-0.187295	0.132165	-0.230885	-0.442285	-0.055045	0.17612	0.23252	-0.26312	-0.01122	0.35508	0.368815	-0.02312	0.011435	-0.182345	-0.02634	-0.35328	0.08056	-0.03014	-0.012945	-0.18789	0.1442	0.129005
YKR054C	-0.93097	-0.76555	-0.87832	-0.74077	-0.6854	-0.78688	-0.5143	-0.082805	-0.409655	-0.574515	-0.69955	-0.390195	-0.445105	0.027825	-0.290295	-0.177335	-0.1756	-0.10986	-0.54678	-0.47266	-0.68239	-0.386005	-0.70852	-0.541635	-0.75253	-0.779475	-0.57366	-1.10102	-0.868315	-0.759235	-1.13495	-0.443745	-0.16697	0.12901	-0.77129	-0.55787	-0.32866	-0.185805	-0.40253	-0.870905	-0.684075	-0.42716	-0.92698	-0.39461	-1.00269	-0.737335	-0.8912	-0.74384	-0.492605
YGR055W	-1.38012	-1.36247	-1.41976	-1.23154	-0.88627	-1.51531	-1.41574	-1.33834	-1.0628	-1.70178	-1.33815	-1.38369	-1.31766	-1.47765	-1.48514	-1.36706	-1.08665	-1.3428	-1.11733	-1.77564	-1.66828	-1.9884	-0.92886	-0.544365	-1.327	-1.94839	-1.70286	-1.53889	-1.91799	0.025785	-2.00269	-1.56262	-2.15023	-2.17926	-0.90275	-1.19315	-1.36146	-1.61745	-0.28935	-0.208755	-1.41027	-0.85889	-1.12522	-0.54638	-2.262	0.603465	-0.72337	-2.09382	-1.48182
YMR315W	1.54463	1.31122	1.72914	1.39948	1.7253	1.54397	2.58537	2.68766	2.4072	2.55495	2.92728	2.55172	2.30092	2.58462	2.43148	2.16032	2.53708	2.50092	1.60629	1.75703	1.5999	1.57658	1.51774	1.76137	1.30939	1.00856	1.51428	1.0339	1.35615	1.88519	1.52163	1.94859	1.78737	1.60906	2.06679	1.93209	1.57196	1.33469	1.8665	2.06684	1.34438	1.46911	1.74653	1.2878	1.76487	2.02011	1.6641	1.14184	1.52212
YAL024C	-0.16301	-0.17285	-0.18039	-0.33132	-0.05377	0.08097	-0.64765	-0.473935	-0.444265	-0.617725	-0.71861	-0.482725	-0.092275	-0.128385	-0.190875	-0.220655	-0.33734	-0.32456	-0.53226	-0.51855	-0.33846	-0.254285	-0.37668	-0.125605	-0.50748	-0.524475	-0.51047	-0.747475	-0.700845	-0.494375	-0.654785	-0.276775	-0.30517	-0.09473	-0.81851	-0.42936	-0.42915	-0.301535	-0.36816	-0.525005	-0.601335	-0.44027	-0.82034	-0.27507	-0.48012	-0.417315	-0.49582	-0.4191	-0.336945
YKL202W	-0.38063	1.00478	-0.50793	-0.41533	0.05213	-0.26172	-0.92024	-0.795525	-0.481845	-0.717915	-0.44416	-0.323265	-0.219335	0.289255	-0.164705	-0.371535	-0.16524	0.50467	1.02027	0.47588	-0.1374	-0.796135	-0.00483	1.15952	0.43525	-0.274565	0.51592	1.07685	0.500545	0.549615	0.415665	0.153025	0.29925	-0.03297	0.94474	0.15639	0.57268	-0.137575	0.90197	1.39325	1.30536	0.08641	0.77029	-0.50236	0.59506	0.221105	0.08632	0.65636	-0.211425
YKL187C	0.42343	0.60662	0.80182	0.57877	0.59848	0.91358	1.98919	2.11343	1.41631	2.2279	1.46709	1.80995	0.319305	0.735465	0.682985	0.775845	0.81906	0.89243	0.97133	0.76832	2.42949	2.81139	1.59862	0.525405	1.76136	1.9607	2.15867	1.67458	0.917815	0.304855	0.568415	0.819615	1.31137	1.44896	0.59197	0.59118	1.1374	0.711375	1.30589	0.268905	2.35628	2.56313	1.54136	1.36666	1.42775	0.480175	0.93753	2.05258	0.928205
YDR383C	0.56812	0.52456	0.77599	0.73669	0.63172	0.47456	0.50524	0.150895	0.785005	0.802825	0.78492	0.089235	0.739555	0.161775	0.550725	0.406075	0.26401	0.00769	0.29671	0.40409	0.79434	0.121555	0.63591	0.565635	0.55832	0.790675	0.76476	0.989185	0.844945	0.710545	1.97999	0.997665	0.19855	1.19268	0.41437	0.35607	-0.18806	0.414265	0.39459	0.568325	0.780785	-0.22278	0.69485	0.19528	0.77446	0.554605	0.07932	0.14166	0.626585
YDR396W	-0.08441	-0.68947	-0.80247	-0.66577	-0.29316	-1.41084	-0.62034	0.070635	0.048595	-0.983065	-0.61098	-0.547035	-0.900275	-0.916865	-0.569225	-0.272485	-0.97239	-0.43556	0.19786	0.11004	-0.00417	0.202405	0.7607	0.516265	0.04609	0.327025	0.66011	0.240075	0.248285	0.084035	0.576465	-0.288955	0.5209	-0.67022	0.733	-0.15805	0.49525	0.556815	0.0868	0.162295	0.338965	-0.01301	0.61734	1.15862	-0.22983	-0.007395	-0.59216	-0.09087	0.128055
YKL055C	-0.00956	-0.05412	-0.13437	-0.08691	0.34038	-0.63999	-0.63128	-0.442245	-0.351675	-0.535165	-0.53823	-0.699875	-0.408015	-0.265555	-0.524205	-0.175265	-0.23337	-0.05211	-0.25265	-0.82358	-0.68911	-0.445605	-0.16205	-0.527895	0.13908	-0.481995	0.02572	-0.371225	-0.242045	0.003155	-1.32462	-0.352255	-0.19694	-0.17205	-0.71822	-0.53844	-0.09175	-0.325225	-0.56181	-0.995785	0.115895	0.31981	0.11755	-0.05928	-0.50123	-0.555825	-0.17855	-0.01629	-0.033395
YGR115C	-0.25688	0.0224	-0.43716	-0.29202	-0.08249	0.102	0.28623	-0.034115	0.266785	-0.113625	-0.26181	-0.098785	-0.496235	0.147865	0.075495	-0.631995	0.27835	0.1358	0.39028	0.39018	0.69938	0.022635	0.89042	0.493855	0.34028	0.785285	0.85986	0.385915	0.788585	0.437895	0.392985	0.600355	0.86582	0.97276	1.06753	0.46939	0.69298	0.633705	0.37035	-0.181395	0.619485	0.0543	0.76356	0.41569	0.18851	0.347075	0.86193	0.43941	0.567655
YDR035W	-0.66302	-0.40272	-0.58714	-0.48913	-0.35581	-0.70671	-0.53482	-0.668005	-0.816065	-0.677345	-0.9026	-0.668235	-0.117835	-0.134415	-0.110515	-0.377435	-0.18285	-0.15982	-0.55131	-0.47672	-0.63166	-0.327685	-0.39608	-0.445735	-0.71967	-0.485995	-0.43936	-0.424335	-0.566925	-0.473765	-0.900985	-0.573395	-0.51806	-0.5945	-0.57985	-0.41153	-0.7236	-0.473705	-0.71464	-0.607885	-0.593785	-0.43145	-0.54124	-0.47559	-0.6892	-0.488175	-0.56707	-0.41557	-0.738645
YBL062W	0.0321	-0.21965	-0.67227	-0.10889	-0.23852	0.01287	0.52109	-1.04771	0.553945	-0.482755	-1.02177	-0.038825	0.010425	0.314905	-0.496555	-1.094	0.24843	0.14455	0.95641	-0.80109	-0.88258	0.072965	-0.14126	0.338765	0.72942	-0.424555	-1.43963	-0.345925	-0.495125	0.143475	0.328225	-0.300035	-0.56458	0.40809	-0.09605	1.05808	-0.31485	-0.253145	-0.61701	-0.071725	-0.487005	0.20076	0.31261	0.45458	-0.17653	1.04455	0.15906	0.03167	0.039885
YHR160C	0.08802	0.42485	0.34582	0.35011	-0.1762	0.2944	0.60774	0.406265	0.567065	1.12748	0.5459	0.057865	0.653125	0.702995	-0.048945	0.952345	0.18786	0.25168	0.50353	1.08974	1.43467	1.19583	0.72726	0.822465	0.70665	0.806815	0.88974	1.39905	0.769075	0.903145	0.420085	0.193225	0.92292	1.69072	0.1386	0.88259	0.93579	0.923055	0.76265	1.23701	1.28401	1.1976	0.3668	0.35816	1.27142	0.929835	0.77476	1.12684	0.611035
YGR047C	-0.3874	-0.4543	-0.55002	-0.47239	-0.4444	-0.50677	-0.32554	-0.385345	-0.254805	-0.282125	-0.29818	-0.195575	-0.100905	-0.019645	-0.176995	-0.205205	-0.20328	-0.13143	-0.63201	-0.59859	-0.60692	-0.587735	-0.61152	-0.387525	-1.06039	-0.618385	-0.80999	-0.785585	-0.673035	-0.563165	-0.280155	-0.442195	-0.57211	-0.50654	-0.67726	-0.27266	-0.77338	-0.530335	-0.44007	-0.327335	-0.550855	-0.83044	-0.51539	-0.39695	-0.52132	-0.386935	-0.62513	-0.69257	-0.571875
YDR119W	-1.36973	-1.04894	-1.27063	-1.16109	-1.41198	-1.26493	-0.79245	-0.365175	-0.661025	-1.39646	-0.91259	-0.887025	-1.0782	-0.901885	-1.01716	-0.692615	-0.79257	-0.84054	-1.45411	-1.71472	-1.33285	-1.01504	-0.97619	-0.903955	-0.32209	-0.956495	-0.79803	-1.175	-1.51307	-1.0856	-1.67336	-1.28465	-1.05457	-0.84213	-1.47958	-1.16615	-0.6913	-0.633205	-0.68226	-1.24584	-0.821755	-0.63627	-1.25502	-0.68954	-1.08586	-1.33041	-0.88248	-1.17269	-1.1284
YBR208C	-0.82292	-0.94888	-0.86735	-0.63276	-0.78051	-0.88322	-1.29774	-1.20694	-1.28534	-1.49056	-1.50483	-1.33384	-1.08333	-0.877375	-0.891155	-0.276715	-0.74525	-0.69031	-0.62857	-0.91256	-0.38467	-0.386125	-1.45156	-1.38298	-0.56339	-0.921045	-0.37724	-0.750055	-0.499055	-0.897325	-1.77442	-1.24283	-1.84049	-1.404	-0.35438	-0.65949	-1.1222	-1.3099	-1.25016	-1.84954	-0.972035	-0.95473	-0.90033	-0.34564	-1.44504	-0.903245	-1.31983	-1.31672	-0.113955
YER151C	-0.12126	-0.21986	-0.24947	-0.63094	-0.30827	-0.0968	-0.98515	-0.514575	-0.544965	-0.804375	-0.66391	-0.647955	-0.263365	-0.430695	-0.489735	-0.547965	-0.68081	-0.68595	-0.49032	-0.30308	-0.16553	-0.298065	-0.48012	-0.231295	-0.85411	-0.320145	-1.00095	-0.881305	-0.441245	-0.502495	-0.412055	-0.730515	-0.33745	-0.35651	-0.58034	-0.50063	-0.39845	-0.144315	-0.43295	-0.598475	-0.820285	-0.68691	-0.8161	-0.449	-0.40636	-0.455875	-0.4675	-0.52918	-0.296855
YLR070C	0.1072	0.04655	0.09306	0.30022	0.31304	0.70906	1.24789	0.769425	0.927045	1.70013	0.93241	1.49751	0.721455	0.711775	0.756075	0.526095	0.56045	0.68714	0.50118	0.29611	0.74452	0.602025	0.45594	1.11218	0.01932	0.874355	0.52758	0.832055	0.975195	1.10428	1.27015	1.354	0.43425	0.19227	0.83663	0.85335	0.54837	0.407775	1.01457	1.16978	0.575655	0.72806	0.5337	-0.17518	0.48103	0.527025	0.55718	0.80107	0.767305
YPR019W	-0.34011	-0.23001	-0.05065	-0.04328	-0.23698	-0.33787	0.21588	0.294675	0.063925	-0.029115	-0.06061	0.155135	0.041115	0.252405	0.489325	0.461595	0.38439	0.35685	0.01348	-0.22052	-0.42649	0.004485	-0.29907	-0.212885	-0.01018	-0.390725	-0.00082	-0.150245	-0.124345	-0.172705	-0.668635	-0.047765	-0.15626	0.1143	-0.1529	-0.15728	-0.14548	-0.236945	0.06463	-0.389795	-0.127535	-0.02103	-0.04653	0.0742	-0.17911	-0.004575	0.13383	-0.05666	0.035585
YPL228W	0.17778	0.28715	0.28859	0.10467	0.11554	0.31183	0.1081	0.112915	0.310955	0.203075	0.14796	0.096955	0.385185	0.123305	0.293485	0.002085	0.21801	0.1366	0.10598	0.25584	0.42273	0.088465	0.24279	0.193465	-0.10406	0.160315	-0.06627	-0.041335	0.129625	-0.042255	0.600825	0.029785	0.35298	0.1619	0.03762	0.06281	-0.29333	0.200415	-0.06596	0.324035	0.278655	-0.38561	0.13694	0.00477	0.20123	0.095025	-0.02291	-0.03059	0.039715
YPR190C	-2.51874	-2.34413	-2.56258	-2.32198	-2.35364	-2.35258	-2.227	-2.2272	-2.28819	-2.41441	-2.12346	-1.88045	-1.71813	-1.78248	-1.78116	-1.57569	-2.01826	-1.87654	-2.076	-2.3392	-2.04792	-1.9632	-2.16271	-1.83401	-2.15285	-1.95939	-2.3063	-2.42081	-2.72207	-2.12215	-2.2349	-1.91332	-2.10328	-1.6185	-2.19984	-2.20352	-2.11176	-1.94657	-2.05536	-2.18438	-2.19475	-2.11441	-2.3332	-2.15935	-2.50694	-2.61736	-2.25985	-2.67617	-2.57088
YGR041W	-0.19291	0.04497	0.2011	-0.19278	0.08308	-0.11221	-0.49845	-0.919435	-0.747605	-0.719605	-0.62705	-0.621755	0.075425	0.017985	-0.144875	-0.078735	0.27577	0.05754	0.02575	-0.32316	-0.98997	-0.615595	0.06381	0.042555	-0.16242	-0.226425	-0.61543	-0.726275	-0.647465	0.259105	-0.506315	-0.406975	0.18233	-0.28837	-0.31501	-0.23765	-0.312	-0.542355	0.09117	-0.062235	0.011315	0.31587	-0.04857	-0.01889	-0.39542	0.127325	0.10128	-0.22272	-0.056045
YHR097C	1.95657	1.73418	2.01369	1.39648	1.90943	1.9311	2.90485	2.64579	2.76323	3.25057	2.74983	2.9751	1.99381	2.1239	2.4697	2.13078	2.09936	2.48822	1.74591	2.2913	2.1278	1.78512	1.99113	1.71549	1.68174	2.00974	2.24265	1.89942	1.61221	2.15916	2.99785	2.32817	1.90904	1.29888	1.75615	1.95177	1.70602	2.14575	1.57542	1.50913	2.32387	2.20643	1.66242	1.66912	2.99015	2.66005	2.41386	2.70738	2.28021
YDR353W	0.03596	-0.46588	-0.20426	-0.25456	0.18948	-0.12097	0.23774	0.129825	-0.230475	0.308515	0.22292	0.249175	0.996095	0.957535	0.947095	0.808495	0.95938	1.06733	-0.20629	-0.40379	-0.34776	-0.028275	-0.06494	0.010015	-0.42114	0.056255	-0.56166	-0.823685	-0.562285	-0.499055	-0.549245	-0.588225	-0.33005	-0.48188	-0.33088	-0.40182	-0.16554	-0.518895	-0.23546	-0.262415	-0.240705	-0.0145	-0.18445	-1.05054	-0.76138	-0.702245	-0.18424	2.2765	-0.442195
YPL047W	-0.59107	-0.86065	-0.68275	-0.44829	-1.17308	-0.7593	-0.76989	-0.478045	-0.860895	-0.799255	-0.7622	-0.706655	-0.900215	-1.13233	-0.784265	-0.698775	-0.98	-0.98407	-0.51366	-0.82771	-0.87956	-0.896245	-0.74382	-0.650895	-0.6027	-0.832525	-0.48206	-0.705965	-0.790425	-0.694545	-1.15446	-0.835745	-0.80405	-0.66274	-0.63322	-0.44297	-0.65164	-0.805985	-0.93373	-0.794225	-0.683115	-0.36631	-0.59387	-0.72299	-0.92525	-0.900415	-0.77867	-1.01332	-0.866445
YPL014W	2.12178	1.93623	2.29381	2.30049	2.01643	1.80696	3.63349	3.26916	3.43264	3.68635	3.74415	3.67359	2.04101	1.60213	2.16703	2.27554	2.34311	2.26076	1.85016	1.64056	2.15536	1.97541	2.48475	1.07693	2.83385	2.81275	3.15966	2.49864	2.91906	2.17514	2.80724	2.51471	1.99044	1.89705	2.02875	1.47502	2.68279	2.36556	2.6567	0.691515	3.17218	3.50944	3.50992	2.62377	3.03753	2.14696	2.87681	2.58042	2.25648
YGR007W	-0.10778	-0.3477	-0.24539	-0.16766	-0.09169	-0.41107	-0.4735	-0.752535	-0.504825	-0.418825	-0.36459	-0.554015	-0.242965	-0.338805	-0.310405	-0.212695	-0.27039	-0.05846	-0.22885	-0.00046	-0.36841	-0.579445	-0.5594	-0.048045	-0.51807	-0.592435	-0.38205	-0.490725	-0.335845	-0.239325	-0.543425	-0.453375	-0.3654	-0.36752	-0.11837	-0.26659	-0.72691	-0.685995	-0.41235	-0.170215	-0.514535	-0.61616	-0.61262	-0.58686	-0.44244	-0.504295	-0.39151	-0.83625	-0.490715
YML116W	-0.56343	-0.23832	-0.40181	-0.2202	0.24058	-0.36862	-0.4852	-0.257985	-0.303685	-0.785545	-0.43452	-0.479905	-0.788655	-0.389005	-0.740215	-0.412095	-0.6144	-0.37109	-0.77186	-1.08272	-0.54126	-0.462595	-0.1198	-0.303425	-0.28855	-0.526575	-0.60999	-0.944395	-0.543775	-0.252975	-1.90121	-0.945135	-0.11306	0.01367	-0.71056	-0.60906	0.0674	-0.121835	0.21301	-0.366135	-0.098405	0.56933	-0.56925	-0.2968	-0.31726	-0.611105	-0.05999	0.17197	-0.282365
YOL137W	-0.18266	0.08651	-0.01253	0.00578	-0.57643	-0.12537	-0.19526	0.332235	0.150065	-0.046325	0.26197	0.163565	-0.274045	-0.282465	-0.444885	-0.192555	0.21363	-0.2704	-0.30575	-0.9846	-0.56375	-0.222025	-0.24385	-0.670855	0.64166	-0.271915	0.17986	0.031395	-0.532255	-0.113955	-0.942405	-0.289025	-0.40259	-0.15197	-0.33632	-0.58054	0.01828	-0.199625	-0.05144	-0.707675	-0.048255	0.24377	-0.21207	0.28151	-0.20056	-0.233695	0.17567	-0.05556	0.100615
YGL155W	-0.11936	-0.14341	-0.28961	-0.14524	-0.22082	-0.1832	-0.44168	-0.370975	-0.653075	-0.708615	-0.76086	-0.412625	-0.253625	-0.279735	-0.205195	-0.391715	-0.31701	-0.39665	-0.19874	-0.4148	-0.67298	-0.535605	-0.58578	-0.567745	-0.57451	-0.487285	-0.52877	-0.378605	-0.314935	-0.553635	-0.843695	-0.356915	-0.34546	-0.41217	-0.60001	-0.42306	-0.46514	-0.317055	-0.42406	-0.594265	-0.366125	-0.35357	-0.32447	-0.19615	-0.56146	-0.379435	-0.59618	-0.41554	-0.643855
YER061C	0.22097	0.04979	0.52248	0.2293	0.32404	0.41529	0.16201	0.557575	0.198435	0.255345	0.20835	0.203605	0.136835	0.172835	0.079025	0.180565	-0.06784	0.16771	0.36209	0.414	0.55534	0.335955	0.1771	-0.359565	0.24834	0.635755	-0.19253	0.028605	0.017495	0.083655	-0.439165	0.188915	0.11899	0.37123	0.55213	0.49504	0.2059	0.112645	0.21194	-0.139255	-0.121095	0.04748	-0.20392	-0.13394	-0.08909	0.194025	0.51458	0.63834	0.087895
YKL214C	-0.0087	-0.41272	-0.05752	-0.28937	-0.01949	-0.14782	-0.36022	-0.408975	-0.288965	-0.318065	-0.24674	-0.632155	-0.441695	-0.378115	-0.380525	-0.743935	-0.25993	-0.55468	-0.31985	-0.31017	-0.30357	-0.577735	-0.37828	-0.087375	-0.2422	-0.587225	-0.57005	-0.619235	-0.166915	-0.367415	-0.186935	-0.266625	-0.31374	-0.53946	-0.07854	-0.36594	-0.20241	-0.383725	-0.71015	-0.255855	0.031215	-0.94139	-0.311	-0.89523	-0.34817	-0.675885	-0.21012	-0.58774	-0.299265
YPL119C	1.56534	1.4996	1.63935	1.68984	1.92212	2.03362	2.51893	2.35584	2.09076	2.69414	2.34694	2.40997	0.816065	0.991145	0.749575	1.63451	0.85551	1.00367	1.79669	1.40306	1.90765	1.71388	1.3356	1.22239	1.84577	1.75273	2.20572	1.40204	1.36169	1.59993	1.57827	2.21203	1.76652	1.12019	1.66525	1.79279	1.92043	1.45446	2.25464	1.77245	1.98342	2.07514	1.9743	1.50125	1.63675	1.92206	1.99338	1.88526	1.57224
YDL125C	0.07885	0.27036	0.48068	0.31231	0.40238	-0.15241	0.51975	0.225335	0.453295	0.280395	0.54625	0.479165	-0.141455	-0.359435	-0.123145	0.090965	-0.36248	0.11014	0.10595	-0.14016	-0.01836	-0.080865	0.20276	-0.314385	0.46505	0.134435	0.4276	0.218995	0.568765	0.555775	-0.317335	0.118965	0.09047	0.00461	0.28141	0.05313	0.20503	-0.159675	0.06288	-0.164735	0.083935	0.28717	0.79772	0.40282	0.23167	0.437525	0.28455	0.14911	0.135745
YHR186C	-0.7953	-0.95271	-0.98188	-0.91593	-0.59579	-0.84223	-0.41781	-0.051345	-0.659385	-0.572745	-0.77921	-0.368285	-0.333255	-0.215385	-0.318545	-0.271655	-0.35708	-0.1684	-0.52136	-0.79438	-0.73174	-0.530245	-0.63747	-0.456375	-0.65112	-0.918715	-0.8745	-1.1942	-1.15118	-0.881835	-1.03767	-0.646125	-0.70386	-0.62783	-0.75688	-0.84032	-0.42995	-0.737915	-0.62598	-0.571035	-0.606975	-0.67389	-0.88426	-0.71979	-0.96336	-0.968535	-0.84969	-1.09215	-1.05412
YKL011C	-0.25953	-0.11844	-0.14911	-0.0502	-0.16983	0.34396	-0.01266	-0.228155	-0.255785	0.390345	-0.1582	-0.023855	-0.085065	0.108375	-0.534545	-0.121465	-0.21465	-0.37466	-0.18106	0.0648	0.19394	-0.094395	0.01213	0.108125	-0.453	0.047075	-0.35614	0.183395	0.215705	-0.287105	1.13487	0.422615	-0.2607	-0.09969	0.08817	0.27622	0.08003	-0.288055	-0.67436	0.060045	0.081445	-0.46339	-0.11319	-0.64696	-0.02866	-0.362245	-0.25515	0.23592	-0.181065
YLL019C	1.41247	1.33696	1.46567	1.16137	1.44184	1.28838	1.76864	1.59054	1.55794	1.52636	1.55703	1.43559	0.982155	0.845745	1.13342	1.00375	1.0432	1.25804	1.23259	1.23629	1.12371	1.10438	0.93999	0.650745	1.11197	1.0532	1.25356	0.531805	1.37315	1.13956	0.580395	1.00049	1.70935	1.22549	1.08937	1.15981	1.41737	1.34946	1.3661	0.561455	1.44481	1.68422	1.44627	1.37795	1.34619	1.48978	1.26923	0.99227	1.37006
YNL257C	-0.12033	-0.04214	-0.20379	-0.11214	-0.17407	0.08778	0.14577	0.557885	0.125775	0.413905	0.17001	0.320645	0.069395	0.277195	0.015955	0.168655	0.0167	0.16158	0.31031	0.17402	-0.00222	0.131235	0.0343	0.270905	-0.18219	-0.089825	-0.16025	-0.048795	-0.235655	-0.599105	0.528065	0.361075	-0.12119	0.24963	-0.07864	-0.21569	-0.45125	-0.215255	-0.23044	0.134335	-0.036145	-0.23562	-0.40987	-0.31983	-0.22651	-0.234535	-0.02139	0.28029	-0.119105
YGL199C	-0.30938	0.44428	0.1708	0.5778	0.03443	0.23499	0.57006	0.511145	0.285715	0.542685	0.04349	0.081145	-0.464705	0.347625	-0.102385	0.725295	-0.05116	0.10189	0.1964	0.17119	0.52904	0.371035	0.66035	0.418835	1.43853	1.23472	0.93093	-0.110965	0.212265	0.675565	0.031525	0.417895	1.01349	0.21412	-0.30729	0.01878	0.3456	0.212785	0.793	0.220525	-0.194505	0.69705	0.85477	0.98681	-0.09721	0.289615	0.17811	0.55132	0.172325
YJR092W	-1.47195	-1.21768	-1.41272	-1.4157	-1.72511	-1.27984	-1.27498	-1.3255	-0.929165	-1.13125	-1.07236	-1.07038	-0.747215	-0.955425	-0.701665	-0.845535	-0.78592	-0.91931	-1.35119	-1.5038	-0.92574	-1.27601	-0.99892	-0.581745	-1.1088	-1.451	-0.98805	-1.83275	-1.44348	-1.39306	-0.783035	-1.28825	-1.21237	-1.12782	-1.78777	-1.30953	-1.19655	-1.25209	-0.86032	-0.746245	-1.40301	-1.06273	-1.63213	-0.90447	-1.62952	-1.35712	-1.48636	-1.82587	-1.1825
YDR010C	0.15201	-0.03653	0.85228	0.90823	0.98742	0.81854	0.47592	0.435205	-0.068555	0.710655	0.39997	-0.968275	0.184805	-0.847395	-0.376395	0.717495	0.65603	0.47787	0.94128	0.32478	-0.6236	0.473185	0.40484	0.367485	0.68357	0.650385	-0.14878	0.083815	0.077975	0.236215	1.19988	-0.852255	-0.10978	2.29254	0.34698	0.83076	0.45451	0.218005	0.30666	0.130285	1.56767	1.14441	0.49422	3.44214	0.68793	0.167595	0.78396	0.71233	1.51531
YBR291C	-2.3155	-2.10044	-1.89239	-1.91039	-1.45416	-2.10572	-2.33398	-2.48357	-2.41302	-2.87884	-2.27817	-2.05568	-2.76761	-2.71414	-2.48305	-1.17518	-2.01172	-2.19829	-2.00849	-2.90114	-1.3542	-0.956315	-1.06464	-1.3599	-1.62027	-1.97734	-0.89576	-1.41671	-1.89677	-1.65263	-2.8197	-2.13333	-1.60106	-1.44955	-2.08182	-2.35727	-0.54292	-1.07666	-1.1052	-1.59767	-0.980125	-0.47465	-1.85718	-1.50405	-1.48099	-2.48238	-1.17271	-0.95878	-1.42677
YBL059W	0.05574	0.07214	-0.00161	0.27628	-0.0884	0.49918	0.43305	0.153665	0.449175	0.315715	0.53757	0.214965	-0.176605	-0.116925	0.214355	0.155105	-0.08556	0.28567	-0.11623	0.16487	0.2919	-0.041845	0.3267	0.493695	-0.19632	0.555355	0.23347	0.990995	0.265275	0.452425	0.627335	-0.115115	-0.05153	0.1713	0.2758	0.17928	-0.19477	0.255305	-0.20981	0.504255	0.259345	-0.80107	0.24811	0.2198	0.18275	0.373745	0.07197	0.09378	0.275575
YPL189C-A	-0.06805	0.27727	-0.08508	0.30149	0.35666	0.46358	2.13189	1.91956	1.97327	1.6785	1.75266	1.94569	-0.322875	-0.361725	-0.258505	0.394485	0.25327	-0.19038	-0.19782	-0.28922	0.9882	1.84438	0.35177	-0.144445	2.58265	2.38601	1.71354	1.51421	1.88522	1.48825	0.529585	0.478305	1.01541	0.89863	0.00055	-0.11209	1.3304	1.11607	1.17402	0.039025	1.72894	1.28441	2.59646	1.41418	1.81495	1.63909	0.5136	0.5965	0.719685
YPL275W	0.27861	-0.02957	0.27281	0.25897	-0.17876	0.23779	-0.09109	-0.022475	-0.068035	0.484395	0.1748	0.328885	0.487645	-0.042505	-0.187725	-0.018375	0.29862	0.44961	1.33398	0.48922	0.84089	0.624135	-0.98674	-0.141985	0.67446	0.531285	0.70455	0.480585	-0.849195	0.636075	0.702325	1.06635	1.08343	0.71576	0.49571	0.74753	1.42274	0.814765	0.70977	0.354305	0.663045	0.11285	-0.41669	-0.14199	0.47295	0.684575	0.62946	0.92859	-0.904615
YDR262W	0.42625	0.27515	0.19059	0.49698	0.71471	0.19429	0.95563	0.682015	0.567885	0.475345	0.62083	0.681325	-0.189485	0.087315	0.058225	0.174995	-0.17916	0.39135	0.2433	-0.14768	0.1216	0.117425	0.29076	-0.047015	0.55781	0.248245	0.61524	0.048185	0.152585	-0.040435	0.004655	0.234455	0.25077	-0.08353	0.10363	-0.03039	0.35384	0.140715	0.18303	0.094065	0.583365	0.7172	0.36036	0.02431	0.57172	-0.161885	0.68742	0.69467	0.038725
YLR078C	-0.34309	-0.0935	-0.26913	-0.02291	-0.52228	-0.10751	-0.40858	-0.094855	-0.161995	-0.421065	-0.00856	-0.361895	0.002325	-0.032335	-0.259195	-0.089585	-0.02892	-0.36037	-0.29584	0.2158	-0.21378	-0.317095	-0.4333	-0.330365	-0.32453	-0.011545	-0.28936	0.238935	-0.398965	-0.230625	0.586875	-0.438615	-0.44679	0.12824	0.06075	-0.33791	-0.84884	-0.145715	-0.52079	-0.613815	-0.358265	-0.46908	-0.67528	-0.21819	-0.19507	-0.307725	-0.80811	-0.46362	-0.446995
YFL012W	-0.59033	-0.12879	-0.10631	-0.0859	-0.25192	0.17023	0.04884	-0.078495	-0.496535	0.484125	-0.4491	-0.648665	-0.335295	-0.531755	-0.534115	-0.244975	0.20852	0.46543	-0.09093	0.88453	-0.00782	1.00524	0.10703	0.886575	0.99625	0.833975	0.42606	0.041435	0.628885	0.195625	0.023585	0.340855	-0.02366	0.11008	0.14932	1.22484	0.27457	0.808005	0.39801	0.359685	1.07542	0.41338	0.53386	0.01164	0.73279	0.377915	0.04291	0.40565	0.957005
YDR072C	-0.62008	-0.24496	-0.50206	-0.31235	-0.40764	-0.42171	-0.1341	-0.033285	0.041285	-0.280865	-0.27793	-0.418535	-0.755205	-0.542375	-0.682535	-0.525605	-0.77478	-0.45218	-0.91179	-1.28777	-0.75751	-0.464965	-0.33439	-0.768325	0.30739	-0.077925	-0.10989	-0.305715	-0.910995	-0.299195	-1.01029	-0.511455	-0.39344	-0.50201	-0.87372	-0.82821	-0.24582	-0.385785	-0.27998	-0.486755	-0.292855	0.2872	-0.22039	-0.0502	-0.48038	-0.348055	-0.44094	-0.1431	-0.543335
YKL153W	0.26102	-0.20055	0.13279	0.07051	0.88759	0.08924	-0.0642	0.097675	-0.069155	-0.478495	0.11552	-0.033365	-0.317805	-0.391855	0.097075	-0.198565	0.17699	-0.6436	0.51693	0.47567	0.47256	0.195925	0.68455	0.494195	0.28592	0.206495	0.23308	0.478835	0.503745	0.919815	0.350125	-0.050355	0.76282	-0.04118	0.92507	0.0929	0.70427	0.305595	0.55783	-0.127385	0.304345	0.59977	0.07601	0.65675	0.56294	0.410845	0.65634	0.34998	0.258645
YDR179C	-0.36614	0.14791	-0.7157	-0.03959	-1.09887	-0.11441	-1.44864	-0.713655	-0.982765	-0.178625	-0.25518	-0.480755	-0.757415	-0.645195	-1.34255	-0.870115	-0.84043	-1.30202	-0.91434	-0.10461	-0.19728	-0.376595	-0.32709	-0.136145	-0.71197	0.133855	-0.5824	1.08635	-0.005875	-0.511665	1.19232	0.706315	0.12839	-0.66524	0.03022	0.17668	-1.60495	-0.378045	-0.44979	0.433365	-0.528065	-1.21685	-0.23938	-0.71146	-0.36034	-0.412955	-0.96561	-1.06641	-0.460255
YIL053W	2.44717	1.9353	2.68709	2.22345	3.01741	2.21508	1.76868	1.56254	1.5009	1.56008	2.04191	1.42231	2.41348	2.28349	2.55531	1.98903	2.43654	2.1856	1.30061	1.75712	1.71377	2.05086	1.29552	1.44094	1.64923	2.10026	2.29978	1.98958	1.32896	1.98778	1.14535	0.840065	1.13221	1.00819	1.60929	1.91593	1.8444	2.12717	1.43072	1.12858	2.06465	1.66617	2.37375	1.30179	2.81534	1.37139	1.88631	1.42063	2.53023
YGR220C	0.52981	0.35966	0.20474	0.44272	0.47221	0.30835	-0.10578	-0.122805	-0.099565	-0.009525	0.12936	-0.019675	0.387795	0.114275	0.126555	0.167575	0.0307	-0.00138	0.1397	0.17959	0.22143	0.049525	-0.1302	0.461235	0.21382	0.280665	-0.49804	0.298965	0.200505	-0.020615	0.222585	-0.246525	-0.01463	-0.47697	0.29391	-0.11195	-0.14011	-0.013895	-0.34371	0.244605	-0.061925	-0.49535	-0.18342	-0.15394	0.10213	-0.081965	-0.02692	0.01497	-0.275005
YMR161W	0.29085	0.26032	0.63083	0.50135	0.31538	0.05861	0.08037	0.074865	0.088875	-0.040065	0.07519	0.160615	-0.093255	-0.074235	0.038755	-0.137575	-0.00171	0.10099	0.19743	0.04039	-0.19495	-0.337675	-0.08794	-0.214065	-0.21035	0.140015	0.39684	0.163165	0.722505	0.331325	0.206995	0.398215	-0.18113	-0.43717	0.39025	0.16877	0.00407	-0.147915	0.15542	0.020065	0.186535	0.20673	0.66664	0.17382	-0.21514	0.344245	-0.01532	-0.3067	0.106335
YER011W	-0.96469	-0.71586	-0.98095	-0.69007	-0.61439	-1.2056	-0.82252	-1.25192	-0.448715	-0.412565	-0.52994	-0.747575	-1.01026	-1.1764	-1.18932	-0.353905	-0.53437	-0.54006	-0.81074	-1.55525	-0.90628	-0.931785	-0.30204	-1.06008	-0.32429	-0.911755	-0.46115	-0.958205	-0.950605	-0.681785	-0.929775	-1.00145	-0.83015	-0.8053	-0.91871	-1.49415	-0.51936	-1.14101	0.02096	-1.09878	-0.605195	0.27264	-0.38205	-0.23991	-1.0137	-0.996855	-0.95736	-1.15021	-0.571545
YDR258C	3.96381	4.10612	4.26293	4.12202	3.72819	3.77474	4.04582	4.22532	4.14334	4.22546	4.18405	4.36003	3.29946	4.49868	4.50047	3.62864	4.15826	4.67857	4.52644	5.64485	3.4471	3.50944	3.53481	2.64059	1.7829	3.12416	2.61279	3.2	5.26243	3.24464	4.08591	4.77391	3.25971	3.48711	4.81713	4.42454	2.77605	3.6945	3.70589	3.28611	3.43874	3.19559	3.84688	3.70518	3.91318	3.94774	3.83814	3.25988	4.11925
YDR467C	-0.84568	-0.77753	-0.82857	-0.91834	-1.12049	-0.42311	0.18632	0.042255	-0.896605	-1.02479	-1.08548	-1.30878	0.194235	-0.140025	-0.386675	0.424545	-0.21135	0.83196	-1.0111	-0.25256	-0.77099	0.096505	-1.01433	0.113555	-0.73735	-0.466155	-0.9365	-0.737215	0.242415	-0.335165	-0.719635	-1.83554	-1.69729	-0.78267	-0.39273	0.12103	-1.22394	0.235735	-0.14833	0.332935	-0.291305	-0.91838	-0.95359	-0.80903	-0.4683	-0.620795	-1.17328	-0.20926	-0.708375
YGL162W	-0.85234	-0.79806	-0.83362	-1.01913	-0.85985	-0.78104	-1.25262	-1.63796	-1.53493	-1.03956	-1.643	-1.14132	-1.16407	-1.21616	-0.888835	-0.803055	-1.29119	-0.74683	-1.32296	-2.10458	-0.98774	-1.36199	-0.82711	-1.03198	-0.43609	-0.859055	-0.53074	-0.598705	-1.70629	-0.836485	-1.38657	-1.1459	-1.17407	-1.27035	-1.65072	-2.12935	-0.65296	-1.39508	-1.24466	-1.61566	-0.925835	-0.88794	-1.1737	-1.35266	-0.86643	-1.31418	-1.23857	-0.35919	-1.31601
YNL243W	0.02108	-0.18608	0.07255	-0.23409	0.10286	-0.06303	0.29391	0.623235	0.407315	0.244535	0.41979	0.567655	0.664025	0.754915	0.743375	0.425385	0.85482	0.81584	0.1771	0.27266	0.16895	-0.073165	0.25618	0.466335	-0.32079	-0.383905	-0.0774	-0.622555	-0.442785	0.042255	0.068955	0.354795	0.25463	-0.02186	0.31401	0.15714	-0.30595	-0.078455	0.27448	0.239065	-0.130405	-0.13991	-0.62594	-0.09956	-0.15767	0.059975	0.21158	-0.47887	0.017055
YBR234C	0.39892	0.34627	0.42946	0.43251	0.53286	0.35847	0.61292	0.510395	0.386585	0.329985	0.72026	0.599635	0.427595	0.418335	0.540215	0.457695	0.71366	0.63479	0.24641	0.08437	0.4304	0.256545	0.21738	0.296475	0.57501	0.087035	0.56634	-0.011515	0.354345	0.169775	0.074315	0.355745	0.48862	0.04061	0.32901	0.1217	0.38807	0.302865	0.21922	0.268245	0.479175	0.72928	0.56068	0.21873	0.34463	0.190405	0.51364	0.20665	0.424805
YNL047C	-0.60323	-0.71003	-0.67485	-1.00034	-0.26435	-0.5869	-0.73021	-0.834345	-0.744205	-0.231905	-0.94618	-0.578205	-0.573735	-0.654095	-0.560555	-0.447255	-0.91974	-0.43817	-0.43537	-0.77022	-0.70142	-0.486125	-0.93147	-0.705025	-0.68266	-0.574975	-0.61517	-0.800385	-0.544995	-0.431465	-0.856795	-0.462735	-0.71	-0.38734	-0.70622	-0.55111	-0.52264	-0.743895	-0.99498	-0.983055	-0.521315	-0.32348	-0.5926	-0.56618	-0.70558	-0.725985	-0.83765	-0.37158	-1.00843
YKL038W	0.6631	0.57309	0.634	0.4333	0.53463	0.48715	1.73338	1.56173	1.40362	1.88583	1.5133	1.77537	0.866285	0.793475	1.06617	1.18807	1.12686	1.49188	0.71383	0.54566	1.00839	0.878805	0.59525	0.435545	0.89006	0.499895	1.2744	0.586615	0.908595	0.744315	0.156725	0.353125	0.90957	0.53241	0.30064	0.31067	0.93563	0.717445	0.92435	0.423115	0.744315	1.12764	1.17781	1.13085	0.89958	0.698575	0.80096	0.83247	1.13277
YFL053W	-0.04608	0.1916	0.09082	0.19653	0.00333	0.06841	0.11627	-0.038535	0.124225	0.000785	0.47265	-0.238065	-0.227645	-0.606415	-0.051985	-0.223185	-0.02966	0.02967	0.57676	0.38555	0.77684	0.378135	0.58161	0.722025	0.26084	0.159555	1.03654	0.590155	0.426135	0.488605	0.438245	0.465995	0.40598	0.32413	0.35216	0.28708	0.88957	0.639825	0.52867	0.517095	0.393095	0.74513	1.07344	0.57488	0.42095	0.411285	0.76945	0.6906	0.604825
YOR200W	0.21405	1.75592	0.26698	1.13414	-0.30016	0.63073	0.35468	0.480095	0.836275	0.807305	0.44286	0.942225	-0.086105	0.542695	0.346585	1.55329	0.02366	0.79629	0.20882	0.40335	0.57661	0.841555	0.51898	0.535315	0.31116	0.515315	1.05781	1.39099	-0.106295	1.90109	0.327615	1.41898	1.80881	1.49932	0.77418	0.42771	-0.18754	0.336245	0.51801	0.805055	-0.122525	0.72098	1.24871	2.18995	-0.35401	1.56953	0.36712	0.62749	1.1146
YKR060W	-2.83942	-2.38056	-2.50112	-2.52689	-2.61643	-2.46879	-2.70775	-2.81547	-2.23999	-2.4044	-2.57172	-2.22615	-2.05633	-2.29582	-2.0832	-1.8505	-2.28676	-2.55066	-2.03504	-2.43806	-2.25503	-2.35405	-1.99134	-2.21496	-2.92451	-2.19801	-2.48315	-2.15489	-2.52366	-1.76344	-1.38902	-1.37085	-2.3368	-1.81694	-1.95297	-2.03412	-2.0847	-2.29459	-2.28301	-2.33618	-2.64365	-2.34694	-2.46562	-1.723	-2.01816	-2.1288	-1.85772	-2.59655	-2.4716
YPR200C	0.24903	-0.5777	-0.79555	-0.59247	-0.73393	-0.02002	-0.65313	-0.624485	-1.174	-0.333935	-0.74366	-0.557495	0.004685	-0.462655	-0.102745	0.093435	0.12208	0.13036	-0.57577	0.08038	-0.35545	0.563775	0.01349	0.549655	-0.23295	0.090595	-0.20788	0.901055	0.448205	-0.441915	-0.789685	0.033155	-1.01373	-0.0935	0.18556	0.41539	1.00693	0.420295	-0.30453	0.445715	-0.574095	-0.00415	-0.39756	-0.11794	-1.01367	-0.093255	0.16524	0.42035	-0.550305
YLR411W	0.50784	0.03013	0.06763	0.01782	0.36308	0.56873	-0.77678	-0.120675	-0.119335	-0.929175	-0.17611	-0.663865	-1.3997	-1.61516	-1.64631	-1.61089	-1.47103	-2.59191	0.48874	0.33286	-0.26797	-0.365085	-0.51599	-1.27943	0.29101	0.411835	0.31871	0.518625	0.881835	0.002135	0.200175	-0.736505	0.81818	0.38987	-0.16841	0.28181	0.27586	0.177565	0.2582	0.574395	0.226275	0.13692	-0.17002	0.13251	-0.4039	-0.211905	-0.34723	-0.22854	0.478495
YLR318W	0.16343	0.20529	-0.10099	-0.02245	0.20562	0.81018	-0.45411	-0.107085	-0.504795	-0.052665	-0.64866	-0.179265	0.190995	0.338965	-0.180905	0.309105	0.03456	0.14255	0.05944	0.13154	-0.08649	0.019165	-0.05588	0.303265	-0.24322	-0.034385	-0.34628	0.279305	-0.180515	-0.092815	-0.094385	0.292745	-0.13668	0.20425	-0.1269	0.22954	-0.05112	-0.020565	-0.04436	0.131425	-0.105635	-0.30554	-0.19484	-0.05477	-0.11429	-0.002215	-0.22454	-0.09563	0.149275
YHR150W	-0.5379	-0.18045	-0.3846	-0.30259	-0.37774	-0.36274	-0.05578	0.191785	0.117745	0.104775	-0.15818	-0.105515	-0.276715	-0.023785	-0.318345	-0.158295	-0.33646	-0.18583	-0.17974	-0.03134	-0.28368	-0.108105	-0.08962	-0.317455	-0.48961	-0.179305	-0.37313	0.269215	-0.302845	-0.168185	-0.022795	0.047385	-0.46747	0.08678	-0.2765	-0.13473	-0.03991	0.050225	-0.32032	-0.430575	-0.234295	0.04772	-0.28001	-0.30825	-0.24291	-0.381085	-0.3869	-0.09299	-0.380855
YBR045C	0.58607	0.8499	0.67315	0.81681	0.39878	1.0185	-0.02276	0.509385	0.512965	0.770455	0.3364	0.693125	2.60691	2.31778	2.36484	2.4995	2.4641	2.08113	1.02923	1.24827	1.81024	1.56526	0.1757	0.828785	1.25844	0.987295	1.03606	1.09363	0.912445	0.610725	1.68782	1.48664	0.73341	-0.17219	0.74669	0.90889	0.35974	0.689075	-0.1058	0.926915	0.611705	0.16674	0.93958	1.53813	0.6859	1.01372	0.97867	1.35314	1.34506
YGL219C	1.20579	0.89951	1.03139	0.72277	1.11234	1.07231	0.98475	0.790655	0.745655	1.04496	0.93974	0.926595	0.892645	0.705735	0.755325	0.543055	0.65634	0.61649	1.22152	1.05644	0.93985	1.00236	0.36756	0.687175	0.19274	0.811955	0.69907	0.565725	0.916035	0.456145	0.569555	0.664155	0.81297	0.49271	0.85287	0.85337	0.93937	0.978315	0.67102	0.766555	0.638495	0.73531	0.82693	0.55171	0.9494	0.505725	0.85471	0.92277	0.719435
YFL009W	0.0715	0.3052	0.19813	0.27808	0.37646	0.32705	0.57835	1.10074	0.460775	0.466905	0.48986	0.557425	0.138795	0.494305	0.382985	0.382575	0.58444	0.69188	0.17892	0.20731	-0.01243	0.352695	0.41272	0.008905	0.52554	0.301795	0.74751	0.488325	-0.002305	0.451955	-0.127575	0.306965	0.10988	0.09281	0.23368	0.2976	0.61724	0.530225	0.44572	-0.036535	0.441275	0.49355	0.48006	0.38969	0.19976	0.333815	0.24225	0.55389	0.347805
YKL195W	1.07654	1.22852	1.18531	1.10818	1.10236	0.94658	0.82745	0.312185	1.61016	0.977125	1.506	0.687625	1.31628	0.706785	1.12302	0.629745	0.6985	0.46997	0.18929	0.73178	1.60733	0.697335	1.15063	1.34645	0.75217	0.898665	0.45077	0.772485	0.447365	0.823555	2.09841	0.584265	0.93323	0.66203	0.8649	1.01245	0.33184	0.544235	1.09708	1.3014	0.283045	0.14383	0.48242	0.84551	0.54508	1.38051	0.42344	0.1648	0.641875
YMR039C	0.18111	0.45736	0.40534	0.60761	-0.72368	0.20804	-0.34011	-0.507865	0.273635	-0.050365	0.04661	-0.343595	0.265965	-0.076505	-0.034475	-0.001695	-0.30841	-0.42646	-0.65305	0.46677	0.3362	-0.332275	-0.13191	-0.424135	-0.10842	0.488655	-0.13501	0.312775	0.992495	0.310645	1.10278	0.171645	0.16264	0.26387	0.36024	0.06635	-0.80695	0.062445	-0.57389	-0.082505	-0.163215	-0.7303	0.04166	0.15033	-0.55479	0.497885	-1.24814	-0.88345	0.200485
YGL147C	-2.1239	-1.79461	-2.49851	-1.38339	-2.08789	-1.42254	-1.35682	-1.27372	-1.13461	-1.26361	-1.21022	-1.08152	-0.966645	-0.728035	-0.919985	-0.789035	-1.08727	-0.91541	-1.50981	-1.25509	-2.47922	-1.667	-1.63457	-0.926965	-1.24972	-1.15823	-2.31753	-1.82882	-1.87654	-1.7023	-1.03672	-1.21606	-1.55619	-1.43229	-2.04679	-1.49118	-1.43817	-1.48948	-1.79109	-0.993095	-1.5211	-1.68137	-1.28217	-1.48442	-2.03102	-2.02644	-1.69465	-2.1205	-2.06813
YPR127W	0.56741	0.05992	0.72762	0.34519	1.28571	0.53446	1.2402	1.17405	0.742025	0.781285	0.86108	0.916685	0.556575	0.499125	0.547155	0.681165	0.80541	0.9541	0.43701	0.22737	1.20966	1.09275	1.11828	1.33363	1.14454	1.01206	1.68104	0.938305	0.848665	0.751565	0.455275	0.929725	0.95973	0.51584	1.13059	0.57449	1.15157	0.695305	0.74396	0.775065	1.22412	1.34806	0.97921	-0.0965	0.63475	0.600735	1.99169	3.00624	1.64461
YPL188W	0.43903	0.08734	0.19893	0.39428	0.53004	0.45211	0.36086	0.714915	0.230905	0.551675	0.34737	0.428225	0.314645	0.265395	0.473275	0.383015	0.60548	0.51477	-0.02273	-0.34577	0.48925	0.449125	0.0794	-0.220165	0.34954	-0.117025	0.65827	0.265035	-0.206885	0.237945	-0.100335	0.348715	0.19183	-0.29913	0.17021	0.06086	0.34733	0.160015	0.75168	0.224705	0.447055	0.45681	0.33938	0.22649	0.27182	0.528255	0.1836	0.57227	0.255825
YDR217C	-0.85211	-0.47653	-0.89912	-0.87829	-1.13233	-0.70397	-1.14867	-1.20487	-0.768295	-0.935795	-0.94766	-0.961785	-0.746775	-0.688515	-0.942525	-0.707695	-0.85687	-0.84183	-1.06878	-0.64372	-0.48822	-0.558505	-0.95057	-0.932305	-0.86997	-0.365785	-0.74052	-0.811015	-0.882165	-0.708685	-0.358635	-0.791825	-0.63922	-0.45367	-0.87916	-0.66227	-0.84951	-0.597905	-0.76067	-0.906825	-1.01519	-1.04756	-1.13744	-0.45463	-1.01307	-0.639005	-1.19657	-1.20302	-0.650705
YML015C	-0.75416	-0.75153	-0.98146	-1.04886	-1.0191	-0.83058	-1.17251	-1.09105	-0.523445	-0.788595	-0.88335	-0.842085	-0.558095	-0.809145	-0.716455	-0.807425	-0.9025	-1.02875	-0.99209	-0.88506	-0.54745	-0.904115	-0.40264	-0.921365	-0.98954	-0.890995	-0.92625	-0.382935	-1.0411	-0.505815	0.091275	-1.00158	-0.85212	-0.67277	-0.99325	-1.08138	-1.3134	-0.729185	-0.91446	-0.785545	-0.924325	-1.14387	-0.75735	-0.6279	-0.66006	-0.620475	-1.02855	-1.08655	-0.870115
YJR126C	0.07297	0.05213	0.30827	0.34154	0.26823	0.24278	0.53917	0.875485	0.571025	0.247805	0.48302	0.562085	0.303035	0.735105	0.534545	0.352185	0.61194	0.58945	0.18231	0.44422	0.39474	0.276855	0.30113	0.140295	0.36815	0.268985	0.38852	0.118215	-0.182045	0.136445	0.316985	0.356675	0.13095	0.34216	0.01621	0.07443	0.12869	0.688445	0.33344	-0.017425	0.345625	0.10028	-0.17218	0.16921	0.29401	-0.047715	0.16831	0.04608	0.254905
YPR026W	2.45476	2.45899	2.25216	2.55217	2.47015	2.64413	3.80815	4.05009	3.57543	4.13049	3.62897	4.06022	2.69128	3.0406	2.94629	2.99092	3.02163	3.30195	2.69896	2.39075	2.95908	2.93418	3.12336	2.8501	3.14112	2.82431	3.30019	2.84402	2.21304	2.56654	3.03541	3.08144	2.80603	2.31526	2.41822	2.96838	2.91204	2.76661	3.38539	2.69707	2.90767	2.99348	2.69506	2.59204	2.79233	2.50794	2.98255	2.89359	2.88673
YHR073W	0.17716	0.04929	0.2245	0.07233	0.05059	0.13736	-0.11897	0.130725	-0.001605	-0.142005	-0.26474	-0.091275	-0.227225	-0.088035	-0.154405	-0.158125	-0.13066	-0.07022	0.11611	0.40931	-0.15963	-0.354235	-0.00064	0.177125	-0.18162	-0.224815	-0.18407	-0.370715	0.126515	-0.164715	-0.070865	-0.241055	-0.05928	0.15851	0.12221	0.03163	-0.17614	-0.089285	-0.08941	-0.020155	-0.235025	-0.19548	-0.40956	0.09974	-0.09652	-0.142985	-0.12327	-0.1676	-0.064045
YMR274C	-0.38594	-0.04105	-0.12269	0.07332	-0.22678	-0.32654	-0.13514	-0.047875	0.091855	-0.021765	-0.21267	-0.332285	-0.795045	-1.00314	-0.739855	-0.494285	-0.5826	-0.90256	-0.84515	-1.19244	-0.70927	-0.578265	-0.1416	-0.475115	0.29813	-0.341685	0.19768	0.037375	-0.562285	-0.248825	-1.05993	-0.671215	-0.36314	-0.36028	-0.80971	-0.7879	-0.12366	-0.469975	-0.3276	-0.483765	0.045805	0.56231	-0.11804	-0.22141	-0.26836	-0.456585	-0.14605	0.14589	-0.216975
YHR125W	0.00022	-0.18591	0.33248	-0.29894	-0.21427	-0.45963	0.19678	-0.587805	-0.378395	-0.485035	0.35206	0.667215	-0.488965	-0.513485	-0.612265	0.217535	0.25098	-0.1231	0.22875	0.28419	0.29903	0.699445	1.00083	-0.199205	0.45071	0.707885	0.13415	0.298225	0.324705	0.070785	0.636185	-0.419065	0.66422	0.54111	0.28743	-0.29518	0.45575	0.137285	0.42863	0.019745	0.483665	0.95434	0.38038	0.63446	-0.0691	-0.364705	0.388	0.88756	0.583115
YDL227C	-0.03657	-0.06897	0.10514	0.53926	-0.12564	0.37646	-0.09509	0.082195	0.170895	0.110295	0.08293	-0.119835	-0.023325	0.136645	-0.020575	0.081615	0.22827	0.08463	-2.55346	-3.01516	-2.90947	-2.79564	-2.51954	-1.72401	-3.4556	-2.8141	0.37777	0.717655	-2.85394	0.210595	0.480115	0.428195	-3.50174	-2.17452	0.56794	0.46433	-2.89876	-2.66639	-2.27735	-2.15318	0.215105	0.6061	0.49002	0.83374	0.33537	0.678055	0.58067	0.51076	0.756755
YER119C-A	-0.03805	-0.97486	0.35344	0.2149	0.12289	0.32855	-0.133	0.599545	0.170775	0.022945	0.05096	0.630855	0.673625	0.151905	-0.251045	-0.403215	0.1099	0.20537	0.3282	0.53336	0.18035	0.017335	0.55939	1.22043	-0.95586	0.398645	1.006	0.555205	1.28262	0.298825	-0.216815	0.759245	0.04776	0.92662	0.28024	0.47432	-0.3471	0.620165	0.71089	-0.884885	-0.203025	0.57806	0.57686	-0.12646	0.28355	-0.416435	0.56451	0.07291	0.232905
YMR008C	2.23093	2.21897	2.3772	2.52096	2.17347	2.16275	1.27137	1.34874	1.56492	0.772365	1.34564	1.17936	0.660435	0.778495	0.748625	0.646455	0.86826	0.74586	1.392	1.47961	1.06831	1.50538	0.82384	0.455705	1.4	0.968295	1.73851	1.91256	2.17001	2.95851	0.482865	1.05909	1.12759	0.69407	1.34467	1.02189	1.24908	1.50866	0.97211	0.567955	0.666565	1.30624	2.267	2.69314	1.42023	2.70941	1.08799	0.9881	1.53656
YOR197W	-0.82352	-0.98361	-0.72994	-0.73767	-0.75712	-0.83754	-0.36638	-0.344875	-0.691015	-0.525985	-0.53968	-0.206745	-0.346645	-0.108825	-0.261755	-0.169565	-0.2394	-0.13109	-0.40064	-0.49518	-0.8286	-0.735845	-1.07923	-0.788885	-1.05045	-0.916475	-0.83432	-0.919445	-0.945175	-0.542805	-0.796425	-0.652415	-0.8538	-0.81739	-0.66017	-0.5616	-0.57607	-0.869335	-0.67852	-0.654725	-0.830925	-1.09822	-0.77517	-0.89727	-0.89111	-0.720025	-0.84335	-1.02005	-0.830975
YKL096W-A	-1.51898	-2.05857	-0.92261	-2.41758	-0.94611	-3.0327	-0.28525	-1.94178	-0.726955	-0.920475	-0.34893	-0.823415	-0.242655	-0.838065	-0.227875	-0.233735	-0.58687	-0.40417	-0.82234	-2.86863	-1.47527	-2.36327	-0.81988	-2.6454	-1.14459	-2.82542	-0.52065	-1.425	-1.93999	-1.22903	-0.756055	-1.06885	-1.4069	-1.11484	-1.15141	-2.42548	-1.13162	-2.61278	-1.02104	-2.83372	-0.938965	-0.21153	-0.66288	-0.57127	-1.10759	-1.88894	-0.55849	-0.9383	-0.681605
YNL081C	0.69629	0.81239	0.82524	0.72245	0.6617	0.52337	0.488	0.734635	0.800325	0.608695	0.79889	0.626445	0.651415	0.532095	0.715935	0.909685	0.88791	0.36407	1.15491	0.95773	0.74129	0.410535	0.38763	0.723215	0.80096	0.409155	0.0492	0.648915	0.972305	0.531955	1.35669	0.829195	0.72684	0.0782	1.14712	0.80071	0.61985	0.477365	-0.08499	0.806925	0.312495	-0.04625	0.78748	0.20039	0.6206	0.486625	0.62752	0.82426	0.484925
YDR532C	0.1717	0.60945	0.27867	0.11884	-0.33079	0.2649	-0.16935	-0.297355	0.043625	0.426325	0.41928	0.147135	-0.152465	-0.215765	-0.341435	-0.043165	-0.42973	-0.69625	-0.37645	0.00763	0.71258	-0.230915	-0.01728	0.043215	-0.21133	0.310865	0.3241	0.916935	0.544565	-0.111795	1.8475	0.893545	0.7213	-0.51419	0.29846	0.04953	-0.67773	-0.256795	-0.27767	0.094595	0.219175	-0.4795	0.42285	-0.63246	0.37768	-0.084595	-0.62568	-0.40875	0.088525
YDR049W	-0.58116	-0.51028	-0.59388	-0.71747	-0.56075	-0.3428	-1.20865	-0.992745	-0.600385	-0.777555	-0.7069	-0.869735	-0.226385	-0.297785	-0.462625	-0.395565	-0.61629	-0.52248	-1.26467	-0.72504	-0.3335	-0.749975	-0.68272	-0.357615	-0.86108	-0.542555	-0.75542	-0.940315	-0.777155	-0.653065	-0.284745	-0.747145	-0.61453	-0.60727	-0.53182	-0.82487	-1.01926	-0.748565	-0.78525	-0.451475	-0.931495	-0.99769	-1.0284	-0.5452	-0.97995	-0.880115	-1.07983	-1.23654	-0.812465
YNL319W	-0.08209	-0.02971	-0.34327	-0.35341	0.11911	-0.00613	0.14054	-0.280285	-0.180605	-0.483925	-0.40509	0.201265	0.388835	0.811375	0.033795	0.488395	0.08679	0.37619	-0.86338	0.53965	0.32944	0.035545	0.37404	0.239975	0.99894	0.323975	0.03472	-0.127055	0.273415	0.019045	0.081855	-0.937115	0.33923	0.12201	0.35692	0.03038	0.17844	0.376095	0.18656	-0.414325	-0.082815	-0.37545	-0.49772	0.42703	0.12576	0.034835	0.30136	0.45406	0.120715
YBR113W	-0.36567	-0.54505	-0.18931	-0.34827	-0.20533	-0.88274	0.18665	-0.455565	0.130655	0.004725	0.26138	-0.629895	-0.014545	0.215795	-0.005495	0.105855	0.10862	-0.63446	0.4601	0.14247	0.33045	-0.019755	0.48083	-0.213595	0.07247	-0.203425	-0.2788	-0.099885	0.608545	-0.299895	0.937325	0.466925	0.46943	-0.56484	0.20255	-0.18023	0.94534	-0.189125	0.41854	-0.262405	0.501735	0.37505	0.41419	-0.74141	0.3833	0.263465	0.48547	-0.55384	0.660935
YKL170W	0.7585	0.48727	0.80106	0.23192	0.7665	0.17874	0.25684	-0.030875	0.026685	0.026935	0.44024	0.057245	-0.001555	-0.179515	-0.058985	0.074875	0.41635	0.00768	0.44215	0.3314	0.37115	0.211445	0.04339	0.328765	0.19973	0.108845	-0.31584	0.008415	0.428175	0.317075	0.536315	-0.047435	0.30096	0.19058	0.359	-0.13724	0.2956	0.175145	-0.42584	0.358255	-0.058995	-0.22382	-0.00716	-0.61571	0.12083	-0.085765	0.26371	0.32862	-0.169185
YJL043W	0.22603	0.81642	-0.08582	0.14628	0.09065	-0.08533	-0.01729	0.084805	-0.086415	-0.054045	-0.31017	-0.319385	0.045775	-0.618215	-0.330035	-0.201595	-0.09429	0.03996	0.42747	0.45882	-0.07126	-0.026165	0.37903	0.411715	-0.00854	0.110915	0.46597	0.442765	0.634895	0.334725	-0.158775	0.603595	0.60415	0.65656	1.11287	0.73805	0.34071	0.154195	0.63114	0.160995	0.128065	1.00346	0.48579	0.48764	0.27173	0.794535	0.28686	0.37359	0.390765
YGL047W	1.60859	1.51151	1.7307	1.78548	1.85283	1.18436	1.78503	1.24829	1.16681	1.69107	1.87466	1.59102	1.61126	1.50096	1.74825	1.38494	1.58962	1.80917	1.31658	1.37184	1.13069	1.29347	1.22892	1.49313	1.29599	0.879665	1.38416	1.58563	1.34223	1.67098	1.24324	1.36713	0.8891	1.00854	1.17592	1.38188	0.85161	0.872145	1.30133	1.76375	0.973145	0.9266	1.25368	0.75696	1.74836	1.4167	1.26356	1.84643	1.38708
YLR006C	1.45956	0.93293	1.14651	0.8915	1.64963	1.26064	1.21524	1.10007	1.13011	1.22399	1.08334	1.20461	0.867545	0.842835	1.09342	0.970355	0.92887	1.23153	1.25736	0.89364	1.10168	0.906905	0.99914	1.05676	0.6642	0.763535	0.80719	0.431735	0.748675	0.586475	1.06194	1.09289	0.93099	0.69531	1.08112	0.96648	1.11002	0.576245	1.0915	0.989815	0.645005	0.91724	0.87155	0.51879	1.10853	0.678015	1.05401	0.87008	0.779785
YHR079C	-0.42109	-0.48283	-0.6053	-0.47831	-0.30107	-0.56733	-0.05929	-0.155845	-0.260215	-0.306375	-0.32848	-0.266195	-0.358815	-0.303015	-0.465315	-0.222655	-0.34134	-0.34766	-0.48852	-0.59515	-0.47788	-0.222455	-0.2756	-0.625705	-0.03352	-0.284105	-0.08017	-0.709335	-0.814235	-0.396805	-0.556365	-0.502405	-0.47746	-0.31871	-0.79566	-0.70046	0.03248	-0.050025	-0.25766	-0.888595	-0.128365	-0.04071	-0.58524	-0.22772	-0.48391	-0.558525	-0.54716	-0.42652	-0.340525
YPR171W	-0.30902	-0.66659	-0.15784	-0.51	-0.23027	-0.09525	-0.43605	-0.503115	-0.421635	-0.426375	-0.42074	-0.482075	0.221965	0.108175	0.039125	-0.226755	-0.31998	-0.24085	-0.19389	-0.45821	-0.04004	-0.421985	-0.28238	0.053905	-0.47176	-0.326205	-0.54057	-0.621335	-0.453265	-0.667225	-0.191005	-0.284595	-0.16125	-0.56368	-0.20863	-0.22949	-0.25505	-0.354805	-0.25128	-0.030905	-0.112925	-0.48604	-0.55872	-0.37624	-0.14721	-0.407115	-0.54227	-0.5454	-0.514985
YML063W	-2.35711	-2.37672	-2.60242	-2.03666	-2.43675	-2.5164	-1.24963	-1.66302	-1.33299	-1.25571	-1.37461	-1.02568	-0.883285	-0.754435	-0.879375	-0.663645	-0.86993	-0.86765	-1.50054	-1.39421	-2.39891	-1.72681	-1.7919	-1.1524	-1.51843	-1.41526	-2.43897	-2.17148	-2.28037	-1.90522	-0.904565	-1.30837	-1.68506	-1.57521	-1.87815	-1.54335	-1.60187	-1.50361	-2.14277	-0.871515	-1.75751	-2.33004	-1.70851	-1.98593	-2.37105	-2.22038	-1.5474	-2.01006	-2.04549
YLR178C	3.94265	4.28726	4.24469	3.81169	4.72602	4.55938	5.37404	5.43672	4.78946	5.58124	4.91956	5.23667	3.5516	4.04166	4.17553	4.40029	3.96491	4.96395	4.9089	4.7327	5.66127	4.60914	4.84829	4.42938	5.03387	4.69055	5.84577	4.60757	3.96712	4.04587	5.27783	5.34828	4.52557	3.54724	3.75193	3.49284	4.92442	4.86578	4.35244	4.51806	5.26727	5.68717	3.4773	2.98377	5.58717	4.20643	5.87764	5.64593	5.61899
YHL029C	-0.22446	-0.3999	-0.43858	-0.49882	-0.11464	-0.28844	-0.67615	-0.491655	-0.659695	-0.666285	-0.60573	-0.626425	-0.372495	-0.668595	-0.375105	-0.201115	-0.50798	-0.19122	-0.77359	-1.19252	-0.87521	-0.678045	-0.58012	-0.551585	-0.29018	-0.729955	-0.36086	-1.05163	-0.970395	-0.364505	-1.23575	-0.687955	-0.66689	-0.60727	-0.88203	-0.92888	-0.24932	-0.686125	-0.40655	-0.728245	-0.389955	-0.1496	-0.5075	-0.53652	-0.67124	-0.618675	-0.46331	-0.67062	-0.426185
YJL090C	0.10976	0.05755	0.23171	0.1017	0.00216	0.14132	-0.08385	-0.234895	-0.201195	-0.123115	-0.25797	-0.181925	-0.198985	-0.157015	-0.215515	0.052705	-0.3568	-0.17282	0.24179	-0.07132	-0.20956	0.079965	-0.20194	-0.256205	0.1489	0.076975	-0.18345	-0.200015	-0.079245	-0.206575	-0.297675	0.056305	-0.20181	0.26309	-0.33663	-0.11162	0.1981	-0.024945	-0.28816	-0.246725	-0.216105	-0.20097	-0.40929	0.18947	-0.02544	-0.244885	-0.33254	0.01764	-0.211695
YOR184W	-0.50043	-0.73143	-0.5633	-0.82858	-0.27837	-0.91459	-0.55619	-0.675305	-0.767595	-0.561005	-1.20078	-0.981505	-0.352355	-0.089905	-0.319465	-0.423395	-0.23061	-0.28655	-0.53369	-0.56762	-0.80471	-0.713015	-0.85988	-0.632805	-1.17027	-1.02073	-1.28229	-1.11112	-0.777795	-0.675395	-0.600355	-1.02189	-0.99038	-0.59466	-0.54645	-0.57481	-0.6525	-0.722305	-0.62256	-0.291735	-0.723275	-0.78165	-0.51414	-0.67357	-0.86312	-0.789635	-0.83152	-1.03932	-1.04591
YBR008C	-0.43882	-0.36826	-0.40853	-0.35518	-0.11502	-0.14615	-0.6888	-0.630725	-0.329165	-0.856235	-0.4936	-0.599275	-0.496515	-0.588915	-0.763525	-0.655315	-0.78756	-0.64536	-0.51671	-0.85561	-0.48931	-0.321785	-0.43191	-0.648885	0.1114	-0.390865	0.16764	-0.502025	-0.512785	0.456935	-1.7692	-0.874935	-0.31965	-0.16291	-0.29604	-0.56764	-0.16068	-0.302625	-0.17178	-0.638155	-0.429255	0.54897	-0.39577	-0.14857	-0.45043	-0.421885	-0.58247	0.42464	-0.248535
YDR372C	-0.31224	-0.27928	-0.31026	-0.24036	-0.30522	-0.0042	-0.19311	0.245255	-0.374685	-0.039565	-0.23477	-0.063165	0.100195	-0.136695	-0.000745	-0.159085	0.01315	-0.12507	0.1013	-0.16076	-0.3561	-0.343215	-0.125	0.075085	-0.41457	-0.439525	-0.95124	-0.584665	-0.353985	-0.272445	-0.543365	-0.108855	-0.0933	-0.30591	-0.35941	-0.03682	-0.24081	-0.167545	-0.21351	-0.169615	-0.135395	-0.63608	-0.58135	-0.09652	-0.34143	-0.310675	-0.26214	-0.6093	-0.320855
YHR218W	-0.05069	-0.05286	-0.07769	-0.21405	0.2088	-0.08111	-0.41755	-0.383345	-0.429685	-0.842975	-0.4807	-0.516285	-0.312535	-0.591965	-0.381015	-0.327605	-0.2647	-0.4317	-0.58802	-0.5245	-0.51881	-0.804625	-0.23265	-0.358925	-0.53828	-0.607715	-0.60202	-0.635275	-0.515875	-0.814485	-0.913315	-0.848395	-0.55039	-0.51116	-0.35894	-0.53975	-0.58806	-0.704045	-0.01678	-0.281685	-0.594875	-0.49128	-0.55543	-0.67603	-0.84892	-0.994485	-0.52931	-0.99639	-0.351625
YMR203W	-0.21196	-0.20027	-0.26855	-0.11071	-0.31851	-0.40836	-0.04444	-0.132785	-0.063805	-0.345105	-0.29224	-0.245905	-0.344425	-0.134355	-0.107255	-0.014555	0.23455	0.10092	-0.43615	-0.56679	-0.53223	-0.243335	-0.19892	-0.309985	0.19488	-0.289695	0.06755	-0.201295	-0.282465	-0.035375	-0.856345	-0.464925	-0.41141	-0.6314	-0.3334	-0.56657	-0.07622	-0.401395	-0.31104	-0.407465	-0.335885	0.153	-0.46124	0.06952	-0.57184	-0.356535	-0.18478	-0.38217	-0.457115
YIR008C	-0.07566	-0.22272	-0.08876	-0.04944	0.12781	-0.00249	0.10698	0.091305	-0.307525	0.048175	-0.0392	0.256335	0.308055	0.151905	0.164095	0.346715	0.3183	0.36989	-0.20159	-0.83564	-0.44405	-0.144805	-0.20754	-0.165575	-0.4652	-0.348705	-0.03128	-0.105465	-0.451675	-0.292265	-0.388425	-0.137475	-0.59305	-0.24367	-0.42551	-0.4123	-0.20178	-0.660085	-0.23796	-0.223425	-0.096395	-0.22283	-0.29721	-0.41187	-0.26968	-0.335465	-0.40326	-0.15659	-0.080755
YBL024W	-1.67205	-2.08464	-1.90668	-1.91551	-1.41949	-1.65227	-1.98409	-2.34978	-2.10478	-2.11838	-2.10099	-1.94498	-1.35352	-1.52757	-1.34366	-1.17809	-1.36814	-1.35286	-1.79105	-2.21321	-2.00412	-1.72344	-1.57711	-1.03948	-2.07006	-1.93101	-2.10111	-2.38792	-2.1978	-1.96195	-1.77029	-2.03281	-1.94541	-1.44026	-2.07701	-1.79534	-1.50041	-1.72812	-1.61118	-1.46249	-1.92795	-2.1696	-2.1004	-1.77844	-1.90994	-2.20993	-1.81362	-2.50434	-1.925
YDR317W	-0.0353	0.33479	-0.09194	0.35215	0.0635	0.1366	0.12518	-0.213165	-0.096685	-0.253505	-0.0377	0.164215	-0.351815	-0.405815	0.095415	-0.488935	-0.49202	0.19922	0.61756	0.69343	0.61938	0.472495	0.60567	0.389775	0.30913	0.873655	0.03655	0.151295	0.575555	0.291665	-0.005585	0.207565	0.20558	0.2299	0.36414	0.29242	0.12572	0.473315	0.49122	0.439335	0.348535	0.86398	0.57486	0.18818	0.28831	0.404825	0.06866	0.38061	0.721375
YOL166C	-0.57118	-0.25033	-0.23321	-0.08384	-0.45756	-0.54277	-0.15404	0.074355	-0.310725	-0.147735	-0.87988	-0.241835	0.007235	0.193725	0.388475	0.170045	-0.20925	0.74854	0.20277	0.32509	-0.24746	0.754775	0.30672	0.807015	0.73219	0.221765	-0.03203	0.943125	-0.166815	0.566305	0.092045	-1.0072	-0.40436	0.86422	-0.52205	0.3645	0.54959	0.959345	0.13067	0.638345	0.332725	0.59799	-0.36131	0.33664	-0.25058	0.147885	0.03722	0.01774	0.471305
YJL087C	-1.17177	-0.91544	-1.12633	-1.19485	-1.31431	-1.10157	-1.23589	-1.00829	-0.941515	-1.12562	-1.10711	-1.14421	-0.475915	-0.510165	-0.596465	-0.466445	-0.6065	-0.69316	-1.2096	-1.1414	-0.87336	-0.774895	-0.87171	-0.681885	-0.99961	-0.955125	-1.31789	-1.31004	-1.42561	-0.965615	-1.17287	-1.04516	-0.6858	-1.02134	-1.15395	-1.06684	-1.03594	-0.639625	-0.95223	-0.869165	-1.29425	-1.35756	-1.25592	-0.97502	-1.14181	-1.04601	-1.53794	-1.31727	-0.819395
YJL038C	0.88059	-0.09133	0.09423	-0.09935	-0.48982	-0.37963	0.12693	0.193645	0.244625	0.526035	0.54876	0.158315	0.317185	0.143595	0.637365	-0.317605	-0.13416	-0.19047	0.09892	0.15235	0.62898	0.049205	0.40781	0.248845	0.04509	0.616175	0.78823	0.528675	0.057885	0.487545	0.829795	-0.091815	-0.57804	-0.98934	0.20769	-0.02647	-0.00941	-0.142205	0.7553	0.252225	0.373245	0.1022	1.19506	0.11187	0.31097	0.462745	0.41133	0.05087	-0.028285
YDR043C	1.02208	1.26974	1.27725	1.29921	0.81382	1.50699	1.30981	1.89081	1.74992	1.8592	1.42796	1.73426	0.786645	0.845885	1.15248	1.11547	1.18674	1.31746	2.24566	1.80398	1.69141	1.82936	1.6882	1.58306	1.40189	1.83045	2.13539	1.79469	2.10078	1.65655	1.58349	0.618895	1.51637	1.55904	0.88421	0.94481	1.53579	1.59935	1.56988	1.11715	1.77097	1.78094	1.52316	0.46657	1.80616	2.25651	1.02024	2.07216	0.999855
YHR028C	0.64969	0.62261	0.77315	0.84799	0.92337	0.69861	1.60666	1.84919	1.64257	1.66924	1.5466	1.70575	1.27056	1.84899	1.55977	1.52851	1.78526	1.86344	0.70431	0.78914	0.9077	0.793525	1.21538	1.28608	1.30455	1.0884	1.0718	0.869155	0.596035	0.959815	0.987755	1.04357	1.14013	0.94936	0.67798	0.75635	1.15523	1.15901	1.28354	1.1443	0.591715	0.6879	1.27751	1.08551	1.25495	1.17667	1.31047	1.25979	0.776755
YOR340C	-3.4684	-3.22175	-3.03904	-3.20741	-3.3416	-3.30389	-3.5533	-4.24191	-3.02203	-3.76742	-3.80843	-3.01019	-3.04143	-3.43317	-3.27015	-2.82016	-3.29064	-3.14685	-2.98202	-3.41429	-3.75561	-3.25102	-2.42003	-2.42991	-3.5575	-2.71279	-3.05883	-3.10319	-3.14399	-2.3771	-2.44952	-3.3393	-3.92354	-2.50011	-2.86213	-2.63059	-3.05855	-3.72698	-2.86211	-3.18059	-3.24171	-2.79989	-3.35576	-2.12546	-3.7431	-3.68391	-3.45754	-4.10966	-4.09633
YCL044C	1.28902	1.49506	1.68826	1.44652	1.28219	0.85292	1.49208	0.715285	1.35903	1.37101	1.49014	1.43363	0.818185	0.492435	0.874435	0.745795	0.67363	0.99096	1.16383	0.57914	0.80387	0.831225	0.93319	0.325015	1.51083	0.870325	1.98368	1.49243	1.09059	1.84184	0.616585	0.774395	0.73148	0.56881	1.07296	0.76383	1.08856	0.567915	1.06935	0.592105	1.36357	1.69459	1.65845	1.44903	1.29184	1.81604	1.33383	1.17666	1.56323
YFR022W	1.08673	0.93386	1.45351	1.06653	1.00747	0.87432	0.93177	0.997195	0.675365	0.987535	0.78561	0.802225	0.136505	0.376555	0.380215	0.748565	0.25729	0.82771	0.94742	0.75118	0.61236	0.682395	1.28909	0.590575	1.60817	0.967995	1.46809	1.27479	1.09146	0.603415	0.066235	0.710805	0.82735	0.70151	0.9856	0.64981	1.02294	0.747485	1.08813	0.154935	0.841295	1.38369	0.79076	1.0612	0.86743	0.390615	1.08451	1.58668	1.20586
YEL072W	-0.20625	0.14666	0.062	-0.37848	0.01649	0.54619	-0.3404	-0.237975	-0.275385	0.099825	-0.33939	0.062025	0.067505	0.737685	0.022845	0.035155	0.10425	0.08288	-0.27672	-0.44373	-0.65878	-0.312625	-0.01207	0.681545	-0.41235	0.048495	-1.07585	-0.740965	-0.929555	-0.117895	-0.796625	-0.889365	-0.91637	-0.74462	-0.87684	-0.29267	0.18681	0.008385	0.06727	0.230255	-0.361485	-0.65376	-0.23631	0.06634	-0.75272	-0.109495	-0.4142	-0.02508	-0.090115
YIR010W	-0.50532	-0.4984	-0.56102	-0.68898	-0.433	-0.41569	-0.7126	-0.900995	-0.604015	-0.952665	-0.47953	-0.792475	-0.540275	-0.597605	-0.679705	-0.441235	-0.67856	-0.70551	-0.82004	-0.64117	-0.35347	-0.561305	-0.70038	-0.319405	-0.83894	-0.690305	-0.85395	-1.04537	-0.541845	-1.07435	-0.217675	-0.444785	-0.55232	-0.26936	-0.54463	-0.54028	-0.93446	-0.796525	-0.42253	-0.466915	-0.751905	-0.97344	-1.04994	-0.60656	-0.94276	-0.787695	-0.7662	-1.25196	-0.849185
YBL008W	-0.8653	-0.6133	-0.95439	-0.96238	-0.84665	-0.92978	-0.90445	-0.884265	-0.922515	-0.733535	-0.99937	-0.656485	-0.716405	-0.405865	-0.492955	-0.300265	-0.69258	-0.28126	-0.6078	-0.37807	-0.78519	-0.491175	-1.09075	-0.749965	-0.93117	-0.922445	-1.11486	-0.856425	-0.780215	-0.917345	-1.00097	-0.524395	-0.87909	-0.58823	-0.75876	-0.67209	-0.9154	-0.909605	-0.83246	-0.801335	-0.876335	-0.81703	-0.88567	-0.53517	-1.0955	-0.821815	-1.25559	-0.7072	-0.787595
YMR178W	0.81122	0.68135	0.64974	0.83907	0.65884	0.7486	1.07298	0.962395	0.591805	0.731715	0.74958	0.781985	0.487105	0.762015	0.693145	0.533845	0.79193	0.52727	0.81033	0.89639	0.84992	0.349605	0.39365	0.664005	0.21949	0.566985	0.4707	0.670565	0.714235	0.470085	1.13935	0.505405	0.4077	0.27599	0.80358	0.60035	0.27259	0.653655	0.30378	0.992125	0.506185	-0.25488	0.55184	0.03624	0.84469	0.371545	0.4405	0.60713	0.655405
YOL008W	0.48072	0.31192	0.22985	0.3207	0.52045	0.47269	0.53558	0.601105	-0.013295	0.615625	0.51479	0.339245	0.016995	0.049335	0.214725	0.285465	0.22276	0.51594	0.21696	0.12073	0.13811	0.195555	-0.09531	0.235755	0.38383	0.178315	0.50107	0.383635	0.219735	0.195675	0.009155	0.065875	-0.12411	0.2554	0.14525	-0.203	0.57593	-0.153485	-0.12479	-0.203345	0.320595	0.40408	0.33156	-0.02319	0.19429	0.050425	0.0374	0.79706	0.268725
YHR017W	1.21539	1.16286	1.2442	1.59042	0.86851	0.91774	1.44807	1.83946	1.38821	1.4351	1.34629	1.67996	1.01273	0.922295	1.3968	0.863945	1.16632	1.28407	1.2934	1.33974	0.82731	1.06452	1.01734	0.913535	0.93262	0.795665	1.35983	1.17061	1.1818	1.06618	0.623825	1.17999	1.05778	0.50773	1.37081	0.8718	0.99785	1.15697	0.87657	0.742925	1.19677	1.39748	1.46195	1.34463	1.36099	1.21188	1.25879	1.6016	1.01144
YMR095C	0.28511	1.60484	0.8545	1.0268	1.15471	0.99041	1.68596	1.62628	1.16624	1.86183	1.52399	1.8799	0.750145	0.876005	0.616595	0.503945	0.59548	0.16087	1.65599	1.42196	1.59511	1.05147	1.02086	1.73996	0.98641	0.831365	1.95184	0.708725	0.438875	1.28008	1.20975	2.04209	1.24655	0.82032	1.52329	1.97201	0.85715	0.902075	0.75021	1.38691	0.405425	1.3587	0.35899	0.42939	0.8151	1.64769	1.0396	1.37219	0.884045
YKR101W	0.18096	0.32624	0.18837	0.31862	0.134	0.71743	0.33531	0.245655	0.091915	0.503715	0.21839	0.400985	0.312545	0.359115	0.207415	0.282335	0.15993	0.59777	0.05905	0.38679	0.23464	0.233525	0.37327	0.646355	-0.33492	0.115965	-0.1167	0.445025	0.020975	0.098575	0.886185	0.775395	0.11109	0.99755	0.26142	0.72058	-0.258	0.144035	-0.02707	0.563935	0.169515	-0.15087	0.06606	0.17786	0.30419	0.125045	-0.42297	0.10529	0.154665
YHR198C	1.30641	1.4482	1.50264	1.57179	1.80732	1.776	1.70534	1.86506	1.56089	1.55309	1.67442	1.58547	0.769225	1.01919	0.907875	0.849685	1.15639	1.05049	0.99173	1.07031	1.28035	1.43582	1.02619	1.04341	1.74523	1.35265	1.72601	1.08171	1.35081	0.994485	1.21657	1.12521	1.1978	0.26535	1.41195	1.16629	1.20349	1.24613	1.05227	1.05619	1.62021	1.97403	1.74335	1.13579	1.18895	0.994565	1.53723	2.08182	1.229
YOR076C	-0.11882	0.07869	-0.27178	-0.08814	-0.10612	0.02874	-0.06812	0.140315	-0.005265	-0.011205	0.00857	0.186385	0.105265	0.243945	0.025355	0.055995	-0.13628	0.2441	0.22771	0.33211	-0.04613	0.027125	-0.07585	0.242205	-0.34367	0.199465	-0.34445	-0.058165	0.068925	-0.251005	0.494465	0.049775	-0.11848	0.30941	-0.2496	0.17189	0.00787	0.070195	-0.31789	0.139085	-0.069305	-0.57929	-0.39297	0.13707	0.08187	0.094315	-0.38426	0.0686	-0.197115
YGL015C	-0.05034	-0.67363	0.01054	-0.40104	-0.46424	-0.04818	0.05374	-1.00114	-0.738275	-0.351575	-0.31618	-0.319645	-0.048985	-0.262805	0.087615	-0.604885	0.79674	-0.0722	0.12364	0.52462	0.08031	0.427545	0.09433	-0.186385	-0.04932	0.321865	0.14266	-0.070085	0.452665	-0.260825	0.446835	0.250185	0.20527	0.33691	-0.03279	0.27008	-0.00848	-0.128365	0.11869	-0.180705	0.839675	0.54512	0.70207	-0.16325	-0.30444	-0.204635	0.81668	-0.49945	-0.524995
YNL219C	-0.10365	0.03281	0.01265	0.14912	0.10731	-0.22782	0.10228	0.478295	0.501255	0.128205	0.13394	0.304185	-0.094425	0.066265	0.082355	0.029025	0.06864	0.0667	-0.155	-0.37812	-0.38567	0.016905	-0.07272	-0.302105	0.2178	-0.025355	0.00849	0.220175	-0.200825	0.192075	-0.701905	-0.033185	-0.12135	-0.20908	-0.15699	-0.03021	0.01046	0.029415	0.06279	-0.216475	0.082725	0.39458	0.09215	0.42617	-0.20259	0.007185	0.07232	-0.06458	-0.299635
YLR210W	-0.64153	-0.53569	-0.419	-0.3348	-0.60988	-0.10429	-0.49993	-0.508885	-0.582185	-0.477005	-0.70173	-0.349775	-0.330425	-0.126035	-0.397005	-0.290985	-0.60198	-0.23232	-0.2188	-0.37311	-0.68949	-0.565115	-0.53262	-0.112765	-0.79414	-0.411235	-0.60997	-0.235495	-0.435455	-0.368225	-0.812285	-0.575455	-0.83856	-0.18926	-0.38208	-0.30522	-0.42493	-0.368975	-0.77053	-0.563025	-0.556275	-0.68135	-0.53479	-0.27165	-0.52136	-0.576475	-0.55346	-0.47798	-0.465515
YIL034C	1.06804	1.03043	0.99285	1.06962	0.96615	0.97835	1.24204	1.31367	1.26262	1.32445	1.39279	1.31584	1.15447	1.07333	1.1458	1.21321	1.18652	1.00249	0.95106	0.98292	0.87043	0.847345	0.75738	0.528985	0.98357	0.996225	1.25412	0.816515	0.975995	0.983875	0.985305	1.02551	1.02595	0.43885	0.91925	0.78099	0.89045	0.673445	0.88125	0.609245	0.922055	1.17715	1.00109	1.03327	1.12755	0.914615	1.20979	1.2253	1.16409
YLR148W	0.14713	0.36245	0.29721	0.43739	-0.15731	0.57119	0.1303	0.856975	0.147105	0.049035	0.10443	-0.040465	0.209295	0.340665	0.188405	0.089305	0.28074	0.08518	0.06386	0.43281	0.3651	0.274565	0.05699	0.465895	-0.19191	0.257625	-0.2385	0.063385	0.437995	0.254805	0.328655	-0.006625	0.08414	0.19166	-0.10809	-0.00823	0.18413	0.811085	-0.10068	0.109595	-0.058055	-0.26074	-0.27904	0.16019	0.22643	0.291855	-0.24474	0.3577	0.052315
YOR342C	-1.99337	-1.67039	-2.13301	-2.35491	-1.69684	-1.78226	-2.24695	-2.33472	-2.12114	-2.09488	-2.07279	-2.0829	-0.669395	-1.17705	-1.13035	-0.741845	-1.09195	-1.27779	-1.54327	-2.13091	-2.12913	-2.00221	-1.28056	-0.541225	-1.96942	-1.87711	-2.25219	-1.91914	-2.43822	-2.10345	-1.82954	-1.80625	-1.55309	-1.25232	-2.02428	-1.54429	-1.72053	-2.06696	-2.12948	-1.80181	-2.03606	-1.73139	-1.73273	-1.3541	-2.01971	-2.30438	-1.75295	-2.49645	-1.73778
YOL070C	-0.70737	-0.75694	-0.64995	-0.90636	-0.94078	-0.90078	-1.11383	-1.27367	-0.550295	-0.694225	-0.61857	-0.582195	-0.272025	-0.813275	-0.663195	-0.641165	-0.79792	-0.60434	-1.22758	-1.02194	-0.48645	-0.861935	-0.73286	-0.784285	-0.98641	-0.671815	-1.12114	-1.0615	-0.817755	-0.800155	0.001045	-0.872045	-1.10391	-0.75766	-0.8997	-0.95111	-1.26177	-1.0832	-0.85078	-0.617875	-1.32882	-1.1861	-0.85437	-0.82833	-1.00959	-0.902295	-1.30747	-1.87891	-1.17931
YDL160C	0.50679	0.62903	0.46618	0.60196	0.36649	0.65106	0.64407	0.950165	0.644125	0.574205	0.35203	0.727265	0.661395	0.669565	0.695905	0.559715	0.79692	0.87154	0.11526	0.16283	-0.02154	0.313315	0.12944	0.194375	0.46874	0.505315	0.79869	0.406335	0.797765	0.626515	-0.273685	0.095645	0.16762	0.08608	0.27073	0.07757	0.66869	0.939365	0.22416	-0.156795	0.597185	0.97996	0.53255	0.89978	0.33524	0.644475	0.58617	0.65497	0.693875
YIL043C	-1.09168	-1.32182	-1.03687	-1.09389	-0.83092	-1.38419	-0.93294	-1.17067	-0.927325	-1.23148	-0.79541	-0.974325	-0.899925	-1.07401	-0.808525	-0.828395	-0.87358	-0.73016	-0.76556	-1.16166	-1.1583	-1.13199	-0.52122	-1.0741	-0.57664	-0.899795	-0.91178	-1.04809	-1.12993	-1.00524	-1.28625	-1.19132	-0.98811	-0.90566	-1.02355	-1.2486	-0.93616	-1.4368	-0.63713	-0.942685	-0.965655	-1.06411	-0.87381	-1.22661	-1.04057	-1.20486	-1.15699	-1.43519	-1.33882
YLR124W	0.11932	1.66999	0.59334	1.2028	1.01555	0.12407	-0.02274	0.414245	0.215775	0.514905	0.11144	0.518065	0.431705	0.455045	0.135665	0.489545	0.50603	0.90268	0.93745	1.02882	0.21341	0.947375	0.94057	1.07814	1.10094	1.09573	-0.17983	1.25639	0.720475	1.33235	0.715835	1.32689	0.76418	0.50129	0.74344	0.87357	0.70643	0.498045	1.20056	0.419835	0.271185	1.00408	0.66889	-0.03077	0.29614	0.678445	0.41129	0.9836	0.705975
YGR231C	0.53052	0.70175	0.65731	0.51533	0.98602	0.75375	0.34281	0.776865	0.722455	0.599845	0.87226	0.635355	0.798495	0.877595	0.820715	0.531885	0.73725	0.72727	0.26029	0.81006	0.62682	0.180135	0.38329	0.841585	0.27276	0.425515	-0.41927	0.250095	-0.049025	0.481905	0.382515	0.407505	0.39347	0.61638	0.6697	0.84716	0.11403	0.406975	0.32145	0.954375	0.018145	-0.26202	0.25295	0.4548	0.26539	0.714595	0.23706	0.11506	0.170305
YPR202W	-0.59287	-0.99526	-0.29849	-0.58353	-0.46946	-1.03116	-0.61313	-0.490915	-0.437045	-0.783355	-0.40729	-0.497505	-0.501875	-0.472935	-0.554815	-0.389605	-0.1679	-0.42271	-0.64093	-0.82318	-0.9515	-0.905555	-0.52067	-0.495545	-0.76307	-0.660905	-0.68298	-1.24419	-0.708835	-0.782665	-1.21301	-0.800655	-0.55236	-0.4465	-0.60808	-0.70153	-0.51046	-0.397415	0.06125	-0.354105	-0.820165	-0.80224	-0.70553	-0.6093	-0.62557	-0.845525	-0.80519	-0.93269	-0.726125
YMR266W	-0.6881	-0.57475	-0.73343	-0.52524	-0.72085	-0.71202	-0.79679	-0.550705	-0.360155	-0.755865	-0.67975	-0.599085	-0.403155	0.047625	-0.252115	0.085785	0.17639	0.07327	-0.90619	-1.06721	-1.87801	-1.31269	-0.44572	-1.41051	-0.71782	-0.756405	-0.23516	-0.498255	-0.572845	-0.795295	-1.28317	-0.965585	-0.86144	-0.59897	-1.31737	-1.43277	-0.76782	-0.817955	-1.13698	-2.03737	-0.650665	-0.16943	-0.60956	-0.53794	-1.15077	-0.951145	-0.09731	0.01627	-0.065795
YNL021W	0.12832	0.30047	0.11329	0.19158	0.20745	0.09617	-0.07421	0.433725	0.225835	0.058835	-0.07719	0.016705	-0.097225	0.555535	0.179965	0.108495	0.40032	0.13453	-0.02523	-0.04649	0.10217	0.058145	0.04678	0.121755	0.08835	0.215515	0.17812	0.069535	0.190675	0.110695	-0.511435	0.329955	0.07176	-0.68119	0.00843	-0.13775	0.06624	0.263825	0.02389	0.132655	-0.065135	0.05239	0.04612	0.4295	0.20852	0.214845	0.04729	-0.07974	0.317675
YGR034W	-2.59467	-2.65737	-2.3439	-2.14914	-2.20241	-2.54901	-0.97674	-1.84447	-1.39898	-1.68037	-1.35197	-1.48117	-0.987755	-0.941215	-0.878305	-0.827435	-1.06101	-0.8821	-1.87092	-2.62362	-2.27095	-1.91966	-1.77381	-1.34302	-1.23566	-1.93995	-2.12709	-2.61641	-1.63502	-1.98483	-1.66006	-1.93552	-1.85662	-1.63058	-2.10693	-2.17812	-1.53096	-1.80841	-2.4552	-1.40806	-1.679	-2.05277	-1.37272	-2.17403	-2.26452	-2.43221	-1.62802	-2.30985	-2.18707
YPL107W	-0.24814	-0.35246	-0.18686	-0.1831	0.30157	-0.24745	-0.48166	-0.769355	0.094775	0.294585	0.27735	0.017075	-0.056215	-0.355285	-0.292145	-0.267345	-0.46359	-0.4267	-0.70042	-0.51648	0.36992	-0.260385	-0.29719	0.052405	-0.37931	0.009215	-0.60179	-0.214925	-0.436475	-0.248905	0.950885	-0.136935	-0.40917	-0.49777	-0.49057	-0.36377	-0.58499	-0.304335	-0.45674	0.086865	-0.287295	-0.71082	0.20604	-0.62779	-0.22351	-0.186945	-0.67175	-1.02723	-0.385975
YGR088W	3.53859	4.34031	4.0757	3.57408	3.89948	4.29493	7.42466	7.59809	6.55767	7.13396	5.63503	7.32552	3.73941	5.36433	4.90109	6.12838	5.07396	5.9109	4.92155	4.83482	6.23889	5.9539	5.54105	3.68287	6.28064	6.03153	7.84996	6.79558	6.82437	5.85731	6.5248	5.05478	5.81486	5.33897	3.61915	4.10487	6.14456	5.87936	5.37862	4.26316	6.69445	6.50848	6.78512	4.65574	7.22706	5.56179	6.02659	6.42138	7.13232
YHR173C	-0.58369	-0.50675	-0.50111	-0.76189	-1.0685	0.33645	-0.40905	0.034865	-0.657205	0.056115	-0.60132	0.015425	-0.524655	-0.262685	-0.697075	-0.098605	-0.35526	-0.24273	-0.53763	0.26593	-0.6261	-0.199125	0.00022	0.160855	-0.05651	0.037875	-0.78626	-0.057735	-0.242735	-0.273765	-0.698355	-0.751695	-0.29301	0.80327	-0.69659	0.28032	-0.64363	0.220345	-0.1009	0.434945	-0.240565	0.21723	-0.21865	-0.43065	-0.33685	-0.015775	0.01913	0.06782	-0.494875
YCR063W	-0.20117	-0.60333	-0.47214	-0.62766	-0.09939	-0.55447	-0.56593	-0.284145	-0.718595	-0.858565	-0.57428	-0.812585	0.025985	0.154265	0.026635	0.141725	0.17947	0.27407	-0.42916	-0.85233	-0.46655	-0.756205	-0.14217	-0.331505	-0.55039	-1.04439	-0.22966	-1.1388	-0.974265	-0.523325	-0.955305	-0.848865	-0.33586	-0.42451	-1.00244	-1.13111	-0.40879	-0.584685	-0.43756	-0.503095	-0.757595	-0.24637	-1.03107	-0.89665	-0.62531	-0.686135	-0.16269	-0.91927	-0.060075
YHR073W-A	0.22467	0.10481	0.16808	0.10889	-0.15065	-0.01806	-0.15715	-0.376995	-0.196315	-0.042725	-0.07939	-0.077155	-0.108745	-0.144165	-0.010545	-0.001075	-0.40689	-0.19574	0.29277	0.34489	-0.04312	-0.057375	-0.01121	0.099965	-0.32166	0.120905	-0.52542	-0.422425	0.134075	-0.136395	-0.024785	0.009465	-0.01056	0.18583	-0.01158	-0.10472	-0.2873	-0.038385	0.06452	-0.064115	-0.412665	-0.36898	-0.24461	-0.13197	-0.08911	-0.007075	-0.28776	-0.33841	-0.057805
YDL048C	0.68639	1.11147	1.19372	1.01981	0.54868	0.49981	1.11657	1.10966	1.45861	1.47012	1.13046	1.02676	1.35003	1.03889	0.945705	1.61945	1.13464	1.06718	1.38757	1.16691	0.28462	0.868905	0.23157	-0.496825	2.19856	2.10667	1.43178	1.51635	1.34906	1.02916	0.870355	1.29595	1.56249	1.47177	0.64134	0.48667	1.25175	1.17023	0.28786	-0.687815	1.00358	1.90859	2.76511	2.23163	0.5428	0.688735	1.85932	1.56814	0.829805
YML092C	0.73992	0.53664	0.82993	0.65542	0.78616	0.59002	0.80965	0.756525	0.399745	0.727475	0.72748	0.752475	1.0833	1.00344	1.23745	0.776495	0.91629	1.20382	0.60081	0.31044	0.22074	0.223275	0.05953	0.352575	0.32296	0.067365	0.42091	0.146695	0.318575	0.414765	0.200935	0.525935	0.28646	0.26711	0.60102	0.29053	0.37145	0.042355	0.36078	0.553485	0.517885	0.2768	0.52477	-0.00837	0.35659	0.177175	0.36836	0.39666	0.436705
YPR097W	-0.35218	-0.27921	-0.50325	-0.29057	-0.44266	-0.11655	-0.41661	-0.004145	-0.134915	-0.353155	-0.29482	-0.138805	-0.466015	-0.314475	-0.363845	-0.487595	-0.52701	-0.41508	-0.331	-0.10532	-0.38181	-0.142735	-0.47778	-0.301445	-0.56886	-0.107675	-0.59942	-0.511755	-0.538685	-0.311945	-0.046425	-0.022855	-0.36713	-0.22325	-0.45616	-0.11925	-0.5015	-0.038325	-0.33215	-0.469405	-0.382625	-0.55296	-0.66714	-0.14321	-0.42023	-0.362595	-0.52431	-0.26811	-0.407305
YBR201C-A	1.32568	0.85136	0.87572	0.96919	0.90264	0.3263	-0.66148	-0.645205	-0.412835	-0.253085	-1.26311	-0.082475	-1.17317	-1.04198	-1.10235	-0.292285	-1.54721	-0.4113	0.82036	0.14609	-0.94437	-0.327205	1.12993	-0.105195	0.64682	0.497935	0.60364	0.369355	0.226725	-0.224255	0.011105	-0.036115	0.57075	0.49546	-0.03416	-0.35669	0.02131	-0.049565	0.0676	0.231095	0.038375	0.76675	0.70001	0.63704	-0.11404	-0.385085	-0.18167	0.5749	0.480465
YNL056W	-0.03757	-0.15872	0.07697	-0.21397	0.22049	-0.09495	-0.32032	-0.588805	-0.404085	-0.502565	-0.39758	-0.788425	-0.234185	-0.520885	-0.187845	-0.250475	-0.45612	-0.52305	-0.45413	-0.24141	0.1748	-0.625365	-0.35855	-0.211205	-0.43805	-0.210455	-0.26081	0.301295	-0.158965	-0.382985	-0.021245	-0.255775	-0.13939	-0.59958	-0.04089	-0.43002	-0.43572	-0.398085	-0.31971	-0.072165	-0.287085	-0.74632	-0.13087	-0.45199	-0.20549	-0.581695	0.02434	-0.64043	-0.295745
YDL025C	1.58007	1.7352	1.78727	1.82801	1.61466	1.64322	2.05796	1.96731	2.03485	2.1243	2.12514	2.04113	1.0066	0.868875	1.148	0.909825	1.01968	0.99659	1.94225	2.08832	1.34823	1.40776	1.48592	1.14512	1.47549	1.28621	1.48234	1.78173	1.67941	1.48233	2.53254	1.66125	1.42214	1.39723	1.94766	1.89967	1.29568	1.58709	1.5938	1.43318	1.88862	1.58535	1.43703	1.50762	1.73454	1.55485	1.73317	2.16703	1.61101
YAL020C	-0.22758	-0.37988	-0.36036	-0.42584	-0.14481	-0.42119	-0.25384	-0.556025	-0.511005	-0.981235	-0.23857	-0.676295	-0.506265	-0.686985	-0.452125	-0.593895	-0.40942	-0.39731	-0.68322	-1.05089	-0.90368	-0.568545	-0.36555	-0.895215	0.0804	-0.344855	-0.59208	-0.588455	-0.832215	-0.135475	-1.34133	-0.642375	-0.94485	-0.63188	-0.82672	-0.76979	-0.40586	-0.924745	-0.21234	-0.542175	-0.489885	0.09665	-0.44584	-0.5067	-0.87728	-0.552705	-0.17947	-0.39578	-0.537455
YDL243C	0.68668	0.8006	0.85775	0.80084	0.95187	0.28168	0.35962	0.415325	0.249985	0.503185	0.6579	0.382115	0.479575	0.551265	0.762115	0.324265	0.57233	0.62765	0.47333	0.23897	0.10218	0.382595	0.20018	0.849495	0.83829	0.469625	0.10854	0.289795	0.901405	1.33247	-0.332755	-0.217975	0.7073	0.283	1.09408	0.87189	0.49989	0.617975	0.35939	0.915475	0.406075	0.89756	0.31169	0.66887	0.08245	0.504555	1.20151	2.00818	0.966725
YFL017C	-0.21119	-0.16982	-0.2044	-0.13927	-0.52018	-0.52246	0.03499	-0.300815	0.071585	-0.032315	-0.06249	0.031215	-0.055085	-0.277795	0.170705	-0.251705	-0.15519	-0.00347	-0.45635	-0.56226	0.03219	-0.438855	-0.46025	-0.327805	-0.44669	-0.308665	-0.30489	0.175065	-0.314875	-0.252295	0.421305	-0.385485	-0.54808	-0.23867	-0.35916	-0.36745	-0.37076	-0.274645	-0.48008	-0.030905	-0.095125	-0.69544	-0.4692	-0.30307	-0.16411	-0.156485	-0.14759	-0.63201	-0.278075
YGL197W	0.80778	0.62018	0.91053	0.45159	0.89227	0.90005	1.03019	1.08211	0.926005	1.01005	1.01158	1.21745	1.07686	1.14411	1.26106	0.890445	1.21528	1.29411	1.01416	0.92313	0.97951	0.875395	0.84444	0.942545	0.7116	0.677905	0.81676	0.273135	0.491615	0.447735	0.801635	0.967785	1.11855	0.75814	0.6742	0.78368	1.17813	0.963905	1.02317	1.00703	0.634885	0.60976	0.33674	0.68605	0.8976	0.786965	0.93839	0.648	1.14245
YHR092C	-0.00287	0.21215	0.42477	-0.18312	0.3391	-0.6626	-0.93378	-0.430765	-1.03574	-0.905265	-1.42911	-0.615605	-0.203045	-0.707805	-0.842365	0.104725	-0.58214	-0.11655	-1.32855	-1.43353	-1.46429	-1.23263	-1.21265	-1.71388	-0.0695	-0.907525	-1.1024	-1.07604	-1.08779	-1.05374	-0.343005	-0.050405	-0.54833	-0.33724	-0.56248	-0.54537	-0.62718	-0.277475	-0.56476	-1.17935	-0.596295	0.23433	0.36716	-0.32517	-1.8207	-1.51212	-0.1211	0.1452	-1.22754
YLL011W	-2.50424	-2.52399	-2.33522	-2.57287	-2.35931	-2.30399	-2.50916	-2.62005	-2.37901	-2.53119	-2.45245	-2.49219	-1.63711	-1.7142	-1.79574	-1.66761	-1.96524	-1.79223	-2.32141	-2.88977	-2.44262	-2.51724	-2.22844	-2.114	-2.36766	-2.58698	-2.60372	-2.49418	-2.86604	-1.96249	-2.24232	-2.25535	-2.16564	-1.44542	-2.45541	-2.28185	-2.17135	-2.34205	-2.07433	-2.36679	-2.68336	-2.12776	-2.89797	-1.90533	-2.65235	-2.60898	-2.40725	-3.01342	-2.20772
YDR379C-A	2.62072	2.57705	2.48981	2.3802	2.1149	2.74578	2.86551	2.89328	2.86936	3.30218	3.08949	3.11123	3.01024	3.23333	3.49141	2.68066	3.01882	3.28492	2.29037	2.29481	2.00834	1.47847	1.94926	2.55505	2.20524	1.86451	2.13706	1.53958	2.82861	2.68239	3.10736	2.01896	2.05969	0.53263	2.59493	2.65804	1.92588	1.36613	2.16872	2.50203	2.3716	2.27944	2.64651	1.72255	2.62748	2.76851	2.24254	2.37344	2.53059
YNR074C	-0.38489	-0.36877	-0.24678	-0.18693	0.03568	-0.18575	0.22948	0.576055	0.263805	0.139405	0.51759	0.258725	0.016455	0.355255	0.215645	0.282255	0.36792	0.35711	0.08521	-0.37456	-0.32839	-0.147515	-0.32425	-0.346745	-0.21141	-0.154475	-0.21522	-0.189475	-0.163785	0.251365	-0.880115	-0.333045	-0.42659	-0.3556	-0.28101	-0.07106	-0.03394	-0.322355	-0.33283	-0.028355	-0.197075	-0.43404	0.20209	0.05562	-0.02047	-0.462215	-0.37875	0.64513	-0.571655
YDR113C	-0.32457	-0.31026	-0.28879	-0.43463	-0.30754	-0.37687	-0.57775	-0.873515	-0.450975	-0.304065	-0.44322	-0.505295	-0.450365	-0.630385	-0.694395	-0.621305	-0.90014	-0.87684	-0.16403	0.02432	-0.22755	-0.526555	0.03602	-0.108855	-1.35062	-0.459745	-0.65522	-0.122505	-0.084715	-0.518495	0.207455	-0.333575	-0.87305	-0.26222	-0.4728	-0.2479	-1.04454	-0.508365	-0.4313	-0.256045	-0.536655	-0.63372	-0.41312	-0.58444	-0.36097	-0.671155	-0.8582	-0.5463	-0.626845
YLR189C	0.16263	-0.12999	0.06203	-0.00902	0.14939	0.07101	0.66687	0.785275	0.725415	0.782015	0.76932	0.779565	0.430345	0.637495	0.371995	0.468335	0.57549	0.60232	-0.11317	0.33257	0.50368	0.264915	-0.03013	0.051215	0.06222	0.224135	0.05767	-0.104295	-0.194125	-0.068035	1.00904	0.373165	0.11739	0.09113	0.02476	0.11771	-0.01797	0.227085	0.0776	0.082915	0.320465	0.06451	-0.1384	0.13841	-0.07099	0.105195	0.04953	-0.05676	-0.101335
YOL159C	0.72215	0.55267	0.56378	0.83364	0.44408	0.79814	0.85445	0.611475	0.539955	0.419905	0.53034	0.424625	0.154345	0.115225	0.600385	0.739605	0.56639	0.93891	0.39903	0.38559	0.36062	0.284515	0.007	0.314235	0.62072	0.820395	0.60679	0.966725	0.753945	0.101455	0.228445	-0.003215	0.50619	-0.02081	0.5346	0.28533	0.52892	0.046195	0.20926	0.508915	0.608075	0.74529	0.2779	0.34068	0.50378	0.299165	1.17202	0.68076	0.466795
YDL247W	0.67069	0.97818	0.50384	0.70756	0.59405	0.82795	1.42737	1.66745	1.73158	1.7011	1.14513	1.8799	0.839255	1.23294	0.840555	1.32634	0.77067	0.93562	0.30299	0.41903	0.5416	0.579135	1.29408	0.745485	0.73305	0.719825	0.5602	0.411525	0.224165	0.276965	0.785775	1.7651	2.52744	2.2289	0.99778	1.17448	1.3176	1.18671	1.11333	0.581855	1.44636	1.3229	0.76792	1.73936	0.59849	0.297055	0.31371	0.47392	1.62901
YML032C	0.21945	0.17717	0.09427	0.03348	0.22722	0.12192	0.11486	0.024885	-0.092195	0.190755	0.06554	0.088085	0.251335	0.332345	0.350355	0.150095	0.21989	0.29534	-0.02162	0.00013	-0.10804	-0.357925	0.01623	0.021395	-0.13789	0.032035	-0.35432	-0.305025	-0.254705	0.049575	-0.086675	0.023705	-0.20105	-0.45992	0.22181	0.21394	-0.33788	-0.010405	0.26639	0.288925	-0.194015	-0.21782	0.0299	-0.04278	0.10929	-0.004105	-0.03225	-0.1101	-0.222795
YFL028C	0.33311	0.04402	0.38604	0.41473	0.32895	0.10048	-0.2516	-0.031585	-0.185825	-0.510275	-0.27175	-0.325535	0.023735	0.239435	0.116205	0.025745	0.30383	-0.15227	0.20794	0.36004	0.03608	-0.044695	-0.3703	0.016205	-0.42943	-0.209785	-0.27766	0.101055	-0.353015	-0.261355	-0.601505	-0.270065	-0.12224	-0.03259	0.0894	-0.09504	-0.4374	0.201435	-0.54556	-0.263595	-0.418995	-0.22653	-0.19394	-0.02789	-0.18786	-0.506365	-0.26322	-0.00489	-0.220135
YBR256C	0.58483	0.59433	0.41617	0.58424	0.72524	0.65126	0.44087	0.059785	0.109485	0.264875	0.48642	0.217005	0.296415	0.443405	0.383285	0.303895	0.16513	0.28603	0.51342	0.7977	0.5785	0.527985	0.0832	0.384195	0.16512	0.309315	0.32821	0.840775	0.147755	0.177275	0.203515	0.402435	0.49774	-0.30812	0.68151	0.58135	-0.05713	0.184295	0.23256	0.257275	0.149475	-0.20701	0.21889	0.25179	0.59073	0.306795	0.50581	0.65275	0.340455
YOR081C	0.55567	0.50802	0.60099	0.4659	0.70543	0.34169	0.03649	0.029745	0.123105	-0.209765	-0.08208	-0.143565	-0.549785	-0.520045	-0.605095	-0.414845	-0.46718	-0.26477	0.01973	-0.50927	-0.26445	-0.007395	0.34605	-0.419345	0.44566	0.022975	0.75684	0.316525	-0.020585	0.521695	-0.187685	0.046785	0.36932	-0.07525	-0.01483	-0.31704	0.38163	-0.000965	0.47934	-0.012585	0.326765	0.68562	0.49774	0.39672	0.49746	0.321055	0.26073	0.22104	0.456215
YPL024W	0.63745	0.56422	0.89449	0.77152	0.45515	0.36437	0.33794	-0.043475	0.189395	0.587885	0.41674	0.386395	0.844215	0.378735	0.731855	0.703575	0.39871	0.73758	0.42564	0.22873	0.36539	0.266425	0.52689	0.387805	0.66011	0.836375	-4e-05	-0.120795	0.989565	-0.066175	0.110025	-0.562275	0.56289	0.73514	0.1864	0.66928	0.53713	0.734275	0.32789	0.081605	0.092735	0.09209	0.32146	0.17237	0.50028	-0.093815	0.28274	0.41869	0.493505
YLR442C	-0.26825	-0.18483	-0.56477	-0.2351	-0.44555	-0.0927	-0.59679	-0.255205	-0.090575	-0.177015	-0.09807	-0.338305	-0.021305	-0.030485	-0.017545	-0.186325	-0.47208	-0.42999	-0.51571	-0.28496	0.07042	-0.099565	-0.34645	-0.142235	-0.7223	-0.428015	-0.45576	-0.794135	-0.671465	-0.442555	0.240385	-0.324595	-0.23426	0.11484	-0.51412	-0.3208	-0.54039	-0.088345	-0.25089	-0.118515	-0.511775	-0.60832	-0.55032	-0.27543	-0.51592	-0.320995	-0.46671	-0.61995	-0.285695
YMR257C	0.05022	0.03791	-0.22517	0.01073	0.34149	0.15389	0.13958	0.532605	-0.064115	-0.107495	-0.05693	0.242145	0.109585	0.259815	0.213405	0.356415	0.30999	0.15377	-0.02688	-0.0678	0.02886	0.335265	0.01364	0.263415	0.48667	0.011155	0.12293	-0.296465	0.078935	-0.189165	-0.271285	-0.118675	0.10065	0.15041	-0.47606	-0.27146	0.50484	0.373695	0.114	0.109735	0.423645	0.68757	0.20945	0.0064	-0.10923	-0.177605	-0.05608	0.48013	0.027435
YDL219W	-0.27411	-0.4622	-0.24974	-0.49739	-0.51416	-0.49363	-0.57129	-0.520695	-0.449265	-0.396435	-0.2865	-0.515595	-0.294765	-0.229405	-0.185115	-0.515865	-0.22241	-0.32738	-0.36307	-0.36872	-0.43709	-0.645325	-0.86445	-0.578945	-0.71982	-0.441395	-0.69106	-0.271785	-0.563695	-0.100675	0.128035	-0.099005	-0.62428	0.59624	-0.58705	-0.50596	-0.45971	-0.451775	-0.68717	-0.876295	-0.728375	-1.11554	-0.13217	-0.39094	-0.33745	-0.489235	-0.70072	-0.58365	-0.470925
YKR040C	-0.1649	0.55381	-0.1922	-0.10509	0.07968	-0.03963	-0.3007	-1.03717	-0.337785	-0.784445	-0.45234	-0.461335	-0.726915	0.038935	-0.015445	-0.143015	-0.76038	0.13118	0.0011	-0.05921	-0.37597	-0.056145	-0.19806	0.266515	0.24619	-0.101205	0.09634	-0.011105	0.518845	0.337955	-0.742985	0.531415	0.79284	1.3887	-0.76087	-0.16608	0.76643	0.100615	0.22743	0.341605	0.095245	0.13678	0.44351	-0.40758	-0.43074	0.373595	-0.04816	0.03082	-0.349485
YKL122C	-0.63785	-0.49815	-0.67077	-0.91929	-0.77103	-0.70007	-0.57591	-1.30435	-0.788475	-0.566045	-0.48927	-0.779045	-0.268665	-0.862935	-0.607035	-0.577675	-1.20121	-1.26293	-0.84462	-0.78666	-0.44734	-1.18812	-0.23586	-0.887745	-1.13694	-0.643215	-1.05804	-0.237465	-0.506245	-0.599775	0.824895	-1.01229	-0.80727	-0.78528	-0.31255	-0.75513	-0.90822	-0.865535	-0.40301	-0.449305	-1.16253	-1.72845	-1.0619	-0.89079	-0.60819	-0.726425	-1.0286	-1.21533	-0.915825
YGL240W	0.82384	0.41257	0.91542	0.74245	0.72559	0.89469	0.28095	0.829465	0.293935	0.454635	0.40317	0.460225	0.584185	0.995365	0.711475	0.780645	0.95757	0.6831	0.61767	0.27909	0.02056	0.336865	0.57808	0.700075	0.72959	0.318905	0.8716	0.343355	0.427975	0.478165	0.139125	0.642175	0.12302	0.49904	0.52304	0.63435	0.34074	0.279135	0.7205	0.647855	0.467155	0.51366	0.71744	0.27228	0.51337	0.510975	0.74914	0.60164	0.611895
YDL080C	0.66291	0.29526	0.15508	0.35753	0.63204	0.31424	0.26359	0.492835	0.272965	0.233645	-0.06153	0.403865	0.429175	0.412745	0.286175	0.153445	0.42535	0.26756	0.53296	0.49132	0.36104	0.344405	0.17137	0.533435	0.06708	0.024255	0.10677	-0.019305	0.180505	-0.222105	-0.328615	0.317605	0.54369	0.2607	0.28756	0.1635	0.43533	0.349755	-0.021	0.359505	0.109335	0.25481	0.25213	-0.06843	0.2842	0.099735	0.10762	0.18504	0.134005
YEL001C	-0.54937	-0.89612	-0.40401	-0.83524	-1.00285	-0.66761	-0.30475	-0.348535	-0.310795	-0.404335	-0.2423	-0.325985	-0.249575	-0.262805	-0.001215	-0.196065	0.20021	0.06396	-0.7724	-1.00224	-0.87702	-0.634815	-0.51697	-0.793615	-0.36601	-1.04114	-0.37493	-0.731905	-1.31692	-0.476395	-0.914855	-0.698745	-0.76922	-1.23999	-0.54453	-0.79085	-0.76998	-1.07648	-0.43733	-1.03374	-0.444275	-0.41971	-0.71953	-0.46425	-0.75774	-0.707635	-0.61048	-0.72124	-0.581925
YPR168W	-0.21707	-0.12511	-0.15514	-0.21409	-0.30072	0.48788	-0.03141	-0.515145	-0.197065	0.075285	-0.07774	-0.013575	0.458385	0.339385	0.084665	-0.060785	-0.13494	0.0568	-0.30042	0.05009	0.25382	0.204225	-0.07912	0.254365	-0.31488	0.246035	-0.12036	-0.068375	-0.295875	-0.263305	-0.245435	-0.274235	-0.56713	0.19283	-0.76436	-0.17327	-0.1766	0.083375	-0.15776	0.203265	-0.281725	-0.24608	-0.52204	0.12918	-0.27209	0.124285	-0.45409	-0.03434	-0.111655
YLR374C	0.12285	-0.03033	0.25136	0.2683	-0.3228	0.28925	0.55209	0.306285	0.682025	0.314155	0.61871	0.251665	0.877815	0.596685	0.969325	0.828495	0.95085	1.02531	1.03282	0.42123	0.6382	0.362145	0.99287	0.427725	0.17988	-0.046975	0.49098	0.059145	0.641035	0.092945	0.907205	1.3155	1.50694	0.90087	0.38854	0.49374	0.63035	0.166705	0.66048	0.221475	0.382825	0.37699	0.18028	-0.05203	0.10602	0.208845	0.6552	0.24703	0.744695
YDL034W	0.52736	-0.3037	0.08729	-0.67703	0.86702	-0.69496	0.29894	-0.419635	0.790825	-0.515935	0.46734	-0.106885	0.749935	-1.80707	1.30541	0.093705	0.3177	-0.25597	-0.17676	0.18109	-0.1712	0.351065	0.42503	-0.195565	-0.13105	-0.147895	0.29179	0.533835	0.169975	-0.643965	-0.347465	0.730635	0.11365	0.05626	-0.19689	-0.45282	0.63809	0.944165	0.59835	0.133795	1.07523	-0.09319	0.55336	0.0687	1.5479	0.239315	0.03885	0.72526	0.739115
YHR109W	-0.42161	-0.00361	-0.24095	-0.23893	-0.21374	0.19158	-0.49447	0.142935	-0.666505	-0.171185	-0.15106	-0.273735	-0.285365	-0.075835	-0.222145	0.124465	0.08902	0.38278	-0.07176	-0.23785	-0.16531	0.185575	-0.32541	0.002765	-0.25339	0.250345	-0.22027	-0.423035	-0.261935	-0.117315	-0.336765	-0.178155	-0.42816	-0.15486	-0.20528	-0.13456	-0.01995	0.039035	0.02375	-0.207725	-0.062925	0.13621	-0.39889	-0.01197	-0.65218	-0.447765	-0.01865	0.17871	-0.138865
YPL061W	-2.55362	-2.66318	-2.90122	-2.08399	-2.2616	-2.73614	-0.96781	-1.12087	-1.63179	-0.986395	-1.28838	-0.718395	-1.87264	-1.89627	-1.62007	-1.44894	-1.60552	-1.58495	-1.78762	-2.04299	-3.34322	-1.913	-2.11252	-2.28538	-2.04239	-2.29323	-2.37965	-2.70754	-2.4771	-2.42631	-1.63824	-2.17558	-2.5062	-2.49763	-1.74248	-1.64699	-1.58574	-1.87804	-1.57217	-2.31738	-1.55556	-1.51248	-1.72983	-2.22441	-3.44885	-3.28658	-2.30957	-2.64948	-2.61327
YJL060W	0.8557	0.81254	0.86701	1.11801	0.96714	0.59754	1.02194	1.05065	0.847215	1.02314	1.24261	1.04943	1.2612	1.25189	1.37922	1.05306	1.5058	1.63778	0.08615	-0.31928	0.31739	0.129325	0.7589	0.967845	0.72403	-0.014455	0.08192	-1.06232	0.246645	1.134	-0.494485	-0.217815	0.16276	-0.07583	0.18384	0.13456	0.79228	0.209745	0.99634	1.07227	0.352475	1.00761	0.66694	0.56913	-0.10944	1.24585	0.51988	0.29422	0.727065
YLR240W	0.43184	0.24149	0.32228	0.28828	0.62475	0.4998	0.55013	0.779375	0.650655	0.586485	0.56876	0.710445	0.453755	0.519675	0.473815	0.511785	0.49645	0.69485	0.65364	0.4946	0.46336	0.454345	0.59093	0.381455	0.4436	0.367725	0.39813	0.123865	0.222945	0.226675	0.181195	0.561305	0.30352	0.33343	0.53952	0.50194	0.80204	0.431075	0.50508	0.125295	0.631535	0.39537	0.2394	0.27632	0.39131	0.373015	0.57644	0.6033	0.663215
YDR223W	0.12587	1.06342	0.26291	0.70614	-0.29088	0.76416	0.17362	0.478235	0.165275	0.890165	-0.18967	0.759155	0.631255	1.00612	0.479825	1.42267	0.46151	1.06058	0.18906	0.35965	0.92463	0.752235	0.54808	0.588475	0.52614	0.535335	-0.13581	0.659365	0.567455	0.165255	0.198825	0.902925	-0.13849	0.76797	0.00704	0.86268	0.43026	0.684025	0.72565	0.745785	0.286245	0.37021	-0.04867	0.37397	0.42343	0.461825	0.14865	0.62868	0.287995
YPR062W	-0.1847	-0.40221	0.18647	-0.28995	-0.14802	-0.41547	-0.60806	-0.960085	-0.567065	-0.818745	-0.64081	-0.919465	-0.484845	-0.689075	-0.598345	-0.407045	-0.8004	-1.00008	-0.67383	-0.55431	-0.41147	-0.719515	-0.63313	-0.720025	-0.37676	-0.281035	-0.69252	-0.183785	-0.515195	-0.449925	-0.288175	-1.18962	-0.72702	-0.79864	-0.55365	-0.92299	-0.91325	-0.707135	-0.38749	-0.645025	-1.21056	-1.50948	-0.35276	-0.81531	-0.5619	-0.627405	-0.61814	-1.44588	-0.651145
YER174C	-1.15273	-1.41838	-1.03537	-1.1693	-0.89866	-1.20614	-1.58259	-1.19525	-1.3857	-1.50415	-1.7845	-1.34691	-1.84163	-1.66288	-1.59139	-0.302055	-1.80837	-1.84087	-0.61038	-0.89934	-1.5344	-0.933575	-1.08771	-1.02158	-0.46643	-0.204975	-0.4876	-0.743825	-1.01005	-1.01605	-1.14158	-0.983965	-1.15782	-0.67218	-1.02636	-1.05894	-0.51029	-0.781745	-0.95123	-0.714305	-0.944775	-0.89379	-0.43812	-0.94649	-1.29651	-1.08625	-1.48435	-1.56392	-1.23816
YGR104C	-0.25944	0.02899	-0.23749	-0.27028	-0.61815	0.13885	-0.32027	-0.411615	-0.539575	-0.257525	-0.46093	-0.417835	-0.348695	-0.380025	-0.197445	-0.305815	-0.54212	-0.43384	0.01672	-0.33599	-0.39396	-0.509125	-0.6078	-0.255915	-0.72759	-0.786335	-0.72575	-0.469985	-0.323165	-0.150095	-0.082355	-0.427265	-0.39131	-0.481	-0.31952	-0.15329	-0.63987	-0.323515	-0.86566	-0.271905	-0.203155	-1.02746	-0.57584	-0.27322	-0.059	-0.334445	-0.4872	-0.24516	-0.341175
YDR402C	0.20283	1.23171	0.16283	0.57119	0.24123	0.62624	-0.10414	0.625095	0.042005	0.616275	0.21285	0.621155	0.474655	0.614655	0.593035	0.973665	0.59414	0.6995	0.642	0.63896	0.88745	0.615735	0.65132	0.620025	0.48378	0.633575	0.37549	0.660235	0.392955	0.389905	0.367195	0.748335	0.59496	0.26439	0.11942	0.58776	0.6214	0.470825	0.46663	0.419685	0.797315	0.83829	0.71928	0.39607	0.61572	0.464805	0.56165	0.98341	0.585125
YLR037C	0.61059	0.56322	0.76061	0.64951	0.8161	1.05504	0.74436	0.555855	0.621635	1.1992	0.85113	0.704745	0.501155	0.281245	0.298625	0.444555	0.41012	0.06933	0.70502	0.58688	0.55119	0.906865	0.79729	0.442185	1.28752	0.568265	1.14544	1.2126	0.684575	0.948685	0.428005	0.601615	0.65824	0.21755	0.61076	0.46778	0.87085	0.211345	0.89087	0.617865	1.09	1.13392	0.71048	0.92806	0.69987	0.703665	0.55183	0.92168	0.586885
YMR146C	-0.75945	-0.9554	-0.86856	-0.97049	-1.0507	-0.80377	-1.51067	-2.02183	-1.80198	-1.49016	-1.84551	-1.57933	-1.11902	-1.3358	-0.930325	-0.917395	-1.21682	-1.02561	-0.65026	-1.17788	-1.38896	-1.2592	-1.17968	-0.804435	-1.49335	-1.10709	-1.83618	-1.2839	-0.956485	-1.366	-0.851635	-1.36119	-1.4445	-1.07448	-1.28498	-1.26259	-1.01804	-1.32522	-1.37492	-0.936365	-1.52053	-1.7662	-1.26141	-1.23341	-1.45186	-1.62214	-1.66029	-1.64945	-1.4728
YGR241C	0.60299	0.55002	0.60728	0.48397	0.70551	0.7301	0.70579	0.849915	0.667895	0.905295	0.48992	0.930435	0.752365	0.702215	0.721525	0.592305	0.67963	0.62813	0.5805	0.82849	0.50441	0.578955	0.52729	0.206295	0.64989	0.859375	0.4255	0.087295	0.250985	0.164685	0.966075	0.559375	0.72361	0.73233	0.33883	0.41456	0.63493	0.714455	0.55311	0.107655	0.641675	0.42025	0.19947	0.52184	0.64948	0.161355	0.37406	0.64607	0.177675
YGL062W	1.85288	1.59868	1.64259	1.66584	2.10925	1.40871	2.43429	2.66127	2.39358	2.08767	2.6858	2.60922	2.58991	2.78972	2.72478	2.60812	2.9383	2.70774	2.04877	2.27165	2.2314	1.67701	0.97426	2.69111	2.14631	1.39543	1.20728	0.881125	1.71114	2.60947	1.23655	1.73934	2.28073	2.2726	2.23605	2.22432	2.19708	2.26708	1.47529	1.82369	0.435995	2.07306	2.38014	1.94892	1.50937	2.55014	2.24161	0.86845	2.00972
YPR057W	-0.09527	0.0592	0.09006	0.02787	0.09182	0.07553	-0.48817	-0.158805	-0.143875	-0.277245	0.00152	-0.445825	0.255235	-0.098295	0.119715	-0.016305	-0.37381	-0.18285	-0.40734	-0.02665	-0.07831	-0.453275	0.02106	0.206915	-0.30719	-0.383855	-0.20095	0.214235	-0.213915	-0.119305	0.303025	-0.165215	-0.15248	-0.00822	-0.2445	-0.17665	-0.9146	-0.246585	-0.26497	0.117635	-0.144165	-0.61046	-0.27134	-0.14698	-0.27391	-0.245895	-0.58382	-0.65221	-0.200955
YIL012W	-0.5879	-1.04322	-0.75717	-0.53207	-1.002	-0.55078	-0.72546	-0.236735	-0.662875	0.060965	-0.70886	0.150575	-0.270275	0.134895	-0.162035	1.00215	-0.257	-0.02452	0.68927	-0.06601	-0.202	0.042025	-0.30999	-0.124575	-0.09226	-0.114515	-0.48652	0.371155	0.140275	0.162525	0.060675	-0.312415	0.9877	-0.05506	0.32888	0.12763	0.0574	-0.153965	-0.21268	-0.061375	-0.345845	0.1127	0.06471	0.61451	-0.33662	-0.496245	0.00998	0.2953	0.046645
YDR156W	-1.29737	-1.28938	-1.61081	-1.24712	-1.10224	-1.046	-1.70768	-2.26375	-1.95003	-2.04289	-1.69906	-1.91464	-1.44311	-2.02794	-1.38584	-1.32754	-1.4995	-1.51821	-1.45097	-2.29465	-1.551	-2.0519	-1.3709	-1.66644	-0.67124	-1.68656	-1.65135	-1.77221	-1.31858	-1.16098	-2.37217	-2.04827	-1.47136	-1.82838	-1.80237	-1.70803	-1.13532	-2.11714	-1.2673	-1.89312	-1.6584	-0.98437	-1.41727	-1.42536	-1.60345	-1.6356	-0.95809	-1.69277	-1.42707
YJR113C	0.177	-0.02423	0.32692	0.19539	0.02961	0.03892	-0.1516	0.054035	-0.256385	-0.188705	0.09806	-0.179555	0.020725	-0.122655	0.210255	-0.024415	0.30058	0.48106	0.15939	0.04405	-0.39155	-0.285395	-0.2224	-0.091645	0.08886	-0.179335	-0.10766	-0.165735	0.397505	0.010945	-0.449315	-0.391985	-0.22687	0.15225	0.19651	-0.19432	0.47543	0.063125	-0.15163	0.136805	-0.095175	0.10743	0.00013	0.04094	0.15092	-0.347275	0.24917	-0.09934	-0.241865
YPR131C	0.22978	-0.03696	0.17689	-0.026	0.11806	0.10236	0.30395	0.139055	-0.012565	0.168975	0.26436	-0.128735	0.035935	0.145395	0.048675	-0.079375	-0.00952	-0.12372	0.03273	-0.12882	0.06959	-0.242865	-0.20053	0.122555	-0.03723	0.214765	-0.19649	0.481415	0.167095	-0.103215	0.289855	0.340975	-0.04811	-0.03292	0.07739	-0.04624	0.12837	0.074575	-0.26024	0.025195	0.283665	-0.09416	0.02415	-0.38192	0.27887	0.050795	0.14632	0.28668	-0.150955
YLR416C	0.12236	0.71183	0.81147	0.70417	0.40135	0.65533	0.53841	0.509385	0.964245	1.14356	1.19352	0.970465	0.365585	0.454615	0.063835	0.221765	0.09943	-0.02424	0.57635	0.17547	0.57631	0.443595	1.52488	0.561195	0.85058	0.392555	0.89714	0.759115	0.682225	0.096485	0.780305	0.243945	1.55578	1.45692	0.05691	0.9025	0.73214	0.480635	1.07019	1.07444	1.26284	0.99466	0.98925	1.35552	0.26984	1.02778	1.13873	1.2715	0.693485
YLR029C	-2.62668	-2.4401	-2.73751	-2.15414	-2.8931	-2.3818	-1.16777	-1.09149	-1.14559	-1.32967	-1.46888	-1.06269	-0.953595	-0.696745	-0.912645	-0.845615	-0.5855	-1.20059	-1.53739	-1.40446	-1.99457	-1.46145	-1.6079	-1.02197	-1.55272	-1.60299	-2.36429	-2.24996	-1.95294	-1.94114	-0.950435	-1.87572	-1.57881	-1.57793	-1.91055	-1.76249	-1.49799	-1.50144	-1.65881	-1.10814	-2.44463	-2.31095	-1.89111	-2.14046	-2.45487	-2.18093	-1.8588	-2.62269	-2.16118
YMR155W	0.65277	0.20874	0.592	0.7966	0.66749	0.46631	1.01276	1.00984	0.926395	0.997655	0.87624	0.913705	0.149805	0.211325	0.375045	0.262175	0.48539	0.53622	0.19069	0.26128	0.24845	0.784495	0.95894	0.375845	0.91572	0.750715	0.90849	0.761925	0.712245	0.443535	-0.142105	0.590055	0.71654	0.34295	0.44227	0.35936	0.53707	0.622145	0.84614	0.067975	0.706275	1.24947	0.61455	0.84422	0.55592	0.477555	0.93128	1.13248	0.602995
YNL180C	0.41368	0.51199	0.16662	0.01358	-0.56021	0.80316	-0.20654	-0.286405	0.495955	0.673665	0.19328	0.312565	0.020135	-0.528195	-0.188815	-0.333305	-0.27636	-0.78398	0.51726	1.15115	0.42452	-0.044795	0.18577	-0.113845	-0.31714	0.621265	-0.73237	-0.118185	0.912185	-0.161575	1.73196	0.807755	0.7865	0.1867	0.28755	0.63562	-0.61079	0.492025	0.41556	0.297535	-0.414665	-0.4622	0.27074	0.45614	0.15822	0.261185	-0.62425	-0.70036	-0.013945
YIL080W	1.10273	0.9351	1.14433	0.25645	-0.29556	0.87709	0.00815	0.307875	0.545975	0.624395	-0.30431	0.573795	0.327025	-0.027425	0.291155	0.022515	-0.26647	-0.37912	-0.04151	-0.16059	-0.23204	-0.312995	0.27867	0.520045	-0.15095	0.673035	-0.04772	1.06324	-0.179885	0.143715	0.921515	0.450335	0.04242	-0.17552	0.73963	0.81024	0.03118	0.356605	-0.66526	-0.471425	-0.030415	0.38234	0.2578	0.38935	0.59109	0.645155	-0.14307	0.6613	0.458275
YGR164W	-0.0767	-0.35293	0.34075	-0.0827	0.52972	0.36119	0.4216	0.581615	-0.023295	0.430505	0.39453	0.207825	1.106	0.382005	-0.095635	1.06448	1.01097	0.03875	0.26266	0.29129	0.68927	0.828585	0.30101	0.651845	0.52245	0.714765	1.04115	-0.454205	1.89115	1.52425	-0.197735	0.524865	1.08706	0.51606	0.25137	0.40183	0.59377	-0.130585	0.64541	0.451075	0.065455	0.76332	0.11093	0.62883	-0.21048	0.638095	0.28388	1.03888	-0.221985
YOL106W	1.63236	0.71516	0.80446	-0.26582	0.92978	0.07967	1.10904	1.08648	1.04547	1.78085	0.82975	0.902955	0.599675	1.01364	0.902635	0.964715	0.73753	0.66668	1.21861	-0.33643	0.35277	0.184305	1.06902	0.559135	0.39642	-0.306865	0.18118	0.486565	0.327125	0.458495	0.629195	0.794875	-0.16546	0.31408	0.77726	0.35465	0.71332	-0.059635	0.78676	0.109415	0.720225	0.96134	0.82389	-0.25684	1.37712	0.211185	0.52345	0.45099	0.701265
YIL140W	-1.02075	-1.01872	-0.7296	-0.79716	-0.79107	-1.24411	-1.01218	-1.00829	-1.21839	-1.20145	-1.00688	-0.898185	-0.443505	-0.479745	-0.448185	-0.259755	-0.29472	-0.27338	-1.2213	-1.90978	-2.20176	-1.73591	-1.13527	-1.09742	-1.90736	-2.33277	-0.94112	-1.5883	-1.55761	-0.344065	-1.71835	-0.985915	-1.93291	-1.10931	-1.2443	-1.23789	-1.91114	-2.01315	-1.21104	-1.09909	-1.71738	-1.21572	-0.92005	-0.52806	-1.47738	-0.875755	-1.66428	-1.83996	-1.09025
YIL171W-A	0.06336	-0.23662	0.33078	0.25973	0.35021	-0.19792	0.1015	-0.839525	0.545925	-0.149625	-0.137	0.004805	0.089695	-1.09479	0.187985	-0.189605	-0.41342	-0.4506	0.60873	-0.2238	1.02483	0.282725	0.87262	0.385875	1.47035	0.278285	0.59868	0.056365	0.890445	1.10906	0.364645	0.112425	0.55484	0.0667	0.24494	0.0194	1.61134	0.451655	1.14328	-0.493845	-0.066025	0.47294	0.57196	-0.07456	0.59486	0.289435	0.72113	0.82199	0.695185
YDR272W	0.81713	0.78346	1.03544	0.85564	1.04452	0.96551	1.41252	2.03658	1.8195	1.84895	1.90746	1.77682	1.20915	1.32622	1.22098	0.887535	1.18168	0.90536	0.73229	1.42655	1.4141	1.07631	1.65579	1.33262	0.97531	1.32706	1.25612	1.49964	0.510815	1.32001	2.73628	1.40528	0.38354	0.00977	1.43891	1.3934	0.52628	1.47758	0.82644	0.832415	1.374	0.73054	1.20675	0.99139	1.2009	1.36251	0.85955	0.38365	1.21206
YDR114C	0.12234	0.869	-1.01886	0.38996	-0.18278	-0.21948	-0.80282	-0.364015	0.333545	0.268685	1.25711	-0.610415	0.683305	0.166415	-0.038225	-0.949255	-0.38672	0.63833	0.27506	0.62004	0.59976	1.13644	-0.12813	1.09526	0.78256	0.896595	0.69831	0.341515	0.645205	0.593995	0.604085	1.21192	1.784	0.2874	1.16348	0.2928	1.0395	0.482455	0.1162	0.817885	0.571585	0.35443	-0.0772	1.04287	-0.20685	0.377675	0.2107	0.801	-0.167615
YOR238W	-0.14124	-0.02599	0.06097	-0.21506	-0.33802	-0.26596	-0.25666	-0.151455	-0.073875	-0.069555	-0.08073	-0.030425	0.037015	-0.076175	0.069935	0.079785	-0.09483	-0.1922	0.32117	0.04673	-0.4034	-0.125685	-0.29651	-0.468055	-0.62117	-0.266915	-0.76774	0.139225	0.139115	-0.086385	0.268905	-0.374985	-0.38023	-0.40478	-0.09791	0.11967	-0.64992	-0.116275	-0.6495	-0.256795	-0.158325	-0.52939	-0.72566	-0.04395	-0.09039	-0.226655	-0.29566	-0.24317	-0.050305
YKL142W	1.99093	1.96919	2.28319	2.02723	2.15462	1.84574	3.14974	2.75054	3.01171	3.30218	3.39823	3.20512	2.28836	2.03951	2.55388	1.74642	2.20224	2.11861	2.14605	2.55318	2.47606	1.51423	1.87063	2.44019	1.29893	1.72066	1.35741	1.84027	2.10258	2.3569	3.14025	1.9669	2.05257	1.7189	2.42879	2.35305	1.44042	2.12217	1.5137	2.30667	1.86079	0.97196	1.83617	0.76652	2.45892	2.3322	1.88924	1.53392	2.20241
YLR139C	0.05835	0.13661	0.09882	-0.07849	0.28347	-0.0401	0.34143	-0.381005	-0.486175	0.058945	-0.06855	-0.017595	0.052545	-0.460345	0.040715	0.060145	-0.11182	0.08704	-0.3281	-0.75196	-0.21022	-0.134375	-0.10561	-0.322555	0.64837	-0.100865	0.24743	-0.773265	-0.305235	-0.046135	-0.457275	-0.454425	0.09651	-0.02712	-0.29445	-0.6529	-0.00544	-0.273545	0.00562	-0.379985	0.071965	0.42979	0.10997	0.15029	-0.12489	-0.294555	0.17405	0.09315	-0.147255
YNR044W	-0.64462	-0.69177	-1.06586	-0.96283	-0.84816	-0.87518	0.6812	0.465295	0.595345	0.748325	0.63116	0.316925	0.737255	0.689485	0.740195	0.853555	0.65844	0.94719	-2.67631	-3.01421	-3.03464	-2.59418	-1.1545	-1.39973	-0.59176	-0.908665	-0.08608	-0.442175	-2.18237	-0.756705	-0.771235	-0.167905	-2.06235	-1.24476	-0.78873	-0.66829	-0.61373	-1.15433	-2.0807	-2.93547	-0.228625	0.5847	-0.71195	0.15366	-0.63408	-0.719845	-0.23528	-0.14109	0.035145
YPR009W	-0.50748	-0.94445	-0.77787	-0.78576	-0.34674	-0.60946	-0.95063	-1.00697	-0.789395	-0.648705	-0.4409	-0.530305	-0.697195	-0.726095	-0.847445	-0.889115	-0.85291	-0.79487	-0.65279	-0.87658	-1.22437	-1.17433	-0.48851	-1.19125	-0.60287	-0.729245	-0.7221	-0.985545	-0.916335	-0.640985	-0.534515	-0.663235	-0.3879	-0.82903	-1.15546	-1.17564	-0.43681	-0.801905	-0.89093	-1.7573	-0.716315	-0.96613	-0.79259	-1.03945	-0.52976	-0.993305	-0.91695	-0.72498	-0.527815
YHR032W	-1.11716	-0.80349	-0.94718	-0.95352	-0.84893	-1.1814	-1.35445	-1.16536	-1.00805	-1.86825	-1.53763	-1.43979	-1.36688	-1.30994	-1.18258	-1.02799	-1.07212	-1.11771	-1.2545	-1.61545	-1.2775	-1.1302	-1.27638	-1.47359	-0.77045	-1.38699	-1.11019	-1.60796	-1.27523	-1.14047	-2.24005	-1.6156	-1.45129	-1.20474	-1.22865	-1.56808	-1.23035	-1.25429	-1.11579	-1.82129	-1.35715	-0.43626	-1.29853	-0.74543	-1.51828	-1.49164	-1.42123	-1.79241	-0.785905
YDR429C	-1.40315	-1.54539	-1.50283	-1.42577	-1.5952	-1.48991	-2.26851	-2.48764	-1.79774	-1.94508	-1.96458	-1.97483	-1.12708	-2.02935	-1.57289	-1.40064	-1.73166	-1.77695	-1.94399	-1.6621	-1.6072	-1.90909	-1.4612	-1.23283	-1.56639	-1.59908	-2.13155	-1.71859	-1.50778	-1.65141	-0.762925	-1.87052	-1.81751	-1.42219	-1.67136	-1.54639	-2.02802	-1.81184	-1.52593	-0.985835	-1.92254	-2.07096	-1.71569	-1.41362	-1.90888	-1.77466	-1.87617	-2.30032	-2.12161
YNR031C	0.14494	0.12924	0.33039	0.05812	0.21655	0.31035	0.03317	0.519175	0.181615	0.093645	-0.02969	0.222625	0.328445	0.537355	0.453995	0.485415	0.65987	0.68594	0.16295	0.25118	-0.07165	-0.032155	0.0057	0.391005	-0.21388	0.035735	-0.26746	-0.415105	-0.097515	-0.021355	-0.383345	0.143955	0.04967	0.22564	0.01066	0.26723	-0.26856	0.156155	0.19979	0.400575	-0.162175	-0.19524	-0.34725	0.11547	-0.31468	0.087935	0.02502	-0.10337	0.267275
YGL079W	-0.10249	-0.14508	-0.17015	-0.13673	0.23708	0.13135	0.07322	0.076495	-0.144985	0.123285	-0.01217	0.175155	-0.390835	-0.356625	-0.351275	-0.275985	-0.39449	-0.42816	0.2964	-0.38279	0.05717	-0.115525	-0.10971	-0.211805	0.13716	-0.243575	-0.00571	0.040405	-0.501065	-0.008225	-0.036455	0.142775	-0.13185	-0.45933	-0.27492	-0.27256	0.08598	0.052005	-0.177	-0.256325	-0.026395	-0.30968	0.11955	-0.59784	-0.2188	0.079985	-0.0585	0.1504	-0.171055
YHR084W	-1.22279	-0.93842	-1.00347	-1.53449	-0.80376	-0.85066	-0.83033	-1.02429	-0.947685	-0.930215	-0.97193	-0.957665	-0.102925	-0.452375	-0.494085	-0.385945	-0.45987	-0.20299	-1.34297	-1.94824	-1.5883	-1.64355	-1.01681	-1.09125	-1.49102	-1.6486	-1.07636	-1.36363	-1.85153	-0.933675	-1.01543	-1.01087	-1.48729	-1.29972	-1.35664	-1.13764	-1.15316	-1.54719	-1.23742	-1.62878	-1.05398	-0.70306	-1.37256	-0.8271	-1.07753	-0.923755	-0.93305	-0.95227	-0.872245
YOR004W	-3.26007	-3.07748	-2.63542	-3.2071	-3.18827	-3.76045	-3.61159	-4.43835	-2.94962	-3.74345	-3.68625	-3.07424	-3.8275	-4.00042	-3.50461	-2.77877	-3.77908	-3.91862	-2.80596	-3.37906	-3.44042	-3.01294	-2.64203	-3.00309	-3.02656	-2.67565	-3.03942	-3.03661	-2.87574	-2.37365	-2.73557	-3.16737	-3.63187	-1.98964	-2.58027	-2.81152	-2.91249	-2.96909	-2.90812	-3.32303	-3.26299	-2.87337	-3.0056	-2.27663	-3.42134	-3.17607	-3.07717	-4.18499	-3.5759
YMR086C-A	-0.60542	-0.10895	0.01755	0.19345	-0.60867	0.52065	-0.29414	0.246395	0.035305	0.545145	0.15332	0.122015	-0.522965	-0.048985	-0.207505	-0.074105	-0.35658	-0.10968	-0.11364	-0.13379	0.24561	0.690945	0.70625	0.039785	0.48538	0.380915	0.31246	0.558955	-0.071875	-0.268455	-0.571295	1.26215	0.94305	0.17051	-0.36704	0.24205	0.32662	0.121675	0.21359	0.164405	0.512725	0.43847	0.25401	0.53563	0.13749	0.230075	0.07688	0.20442	0.261205
YMR244W	1.07927	0.48551	0.95789	1.15874	1.25624	0.89898	0.2264	0.288935	0.423295	0.262755	0.20962	0.382005	-0.122845	0.188255	0.394975	0.629875	0.42549	0.20425	1.1177	1.03485	1.11985	0.680065	0.89643	0.740765	0.68507	1.17982	1.20507	1.39813	1.57031	1.01802	0.692815	0.875995	0.55289	1.13759	1.39633	1.2506	1.15953	1.27699	0.69946	0.088995	1.20637	0.5602	1.32468	0.33946	0.65989	1.09851	1.04048	0.73126	0.797365
YMR233W	-0.43591	-0.21946	-0.38557	-0.36673	-0.4304	-0.53604	-0.87643	-1.16603	-0.573235	-0.672555	-0.71256	-0.822205	-0.443345	-0.584485	-0.766825	-0.578755	-0.90401	-0.91494	-0.61791	-0.36167	-0.08121	-0.434335	-0.40205	-0.382005	-0.35722	-0.105015	-0.74961	0.082155	-0.680625	-0.191515	0.510585	-0.516945	-0.68283	-0.31213	-0.77076	-0.50931	-0.55232	-0.495335	-0.9765	-0.409705	-0.519645	-1.05494	-0.5395	-0.58601	-0.18507	-0.379485	-0.46363	-0.44903	-0.542205
YLL010C	0.0386	-0.15326	0.11889	-0.46351	0.16479	-0.37724	-0.26643	-0.636675	-0.534795	-0.548025	-0.28821	-0.450675	-0.060495	-0.401105	-0.181295	0.045315	0.01978	-0.12716	-0.04291	-0.35621	-0.38987	-0.327265	-0.08428	-0.584095	0.23681	-0.149675	0.47468	-0.345835	0.128365	-0.194115	-0.367135	-0.793355	0.073	-0.54921	-0.03662	-0.50889	0.38546	0.047545	-0.12141	-0.319085	0.015055	0.39776	0.06364	-0.09002	0.06192	-0.277175	0.14427	0.06357	0.050525
YNL188W	-0.87299	-0.65587	-0.81105	-1.09997	-1.10797	-0.31144	-1.5787	-1.82739	-1.07184	-0.871155	-1.05214	-1.20364	-0.266615	-0.207305	-0.610535	-0.419285	-0.86846	-0.78165	-1.3745	-1.07545	-0.3033	-0.734055	-0.49953	-0.576355	-0.98317	-0.234305	-1.27221	-0.806515	-0.855195	-0.695265	0.099645	-0.927545	-0.83532	-0.58968	-1.14493	-0.81228	-1.40321	-0.964675	-0.88355	-0.235465	-1.27048	-1.15992	-1.09318	-0.51142	-0.5109	-0.857985	-1.10803	-1.38502	-1.02364
YNL104C	0.12025	0.34883	0.19056	0.3811	0.36606	0.03537	0.29546	0.368255	0.348135	0.016195	0.36867	0.294355	1.21087	1.25802	0.974135	1.12142	1.48057	1.20483	0.57846	0.566	0.2134	0.313455	0.46772	0.624245	0.27305	-0.207275	0.66683	-0.219345	-0.022445	0.165255	-0.783595	0.246295	0.44636	0.34996	0.47002	0.54498	0.10412	0.014995	0.3426	0.027185	-0.047855	0.61774	0.48736	0.70774	-0.21715	0.316775	0.39305	0.34795	-0.395945
YKL156C-A	-0.20657	-0.45561	-1.42415	-1.54831	0.35989	-0.23299	-0.36117	1.13966	-0.400255	-0.865405	-0.17429	-0.219075	-0.272215	-0.105715	-0.084285	-0.044525	0.24471	0.3064	1.34195	0.01602	-0.32541	-0.364785	0.87367	-1.05642	0.79959	-0.602865	-0.49645	-0.365075	1.07716	0.312215	1.43823	1.04927	0.12952	1.4881	0.63639	-0.00672	0.34827	0.550445	-0.45998	-0.441065	-0.287545	-0.47381	0.74365	1.30991	-0.33476	-0.367555	1.05078	-0.34759	0.320715
YIL005W	-0.00202	0.11714	0.10018	-0.00249	-0.07843	0.23211	0.55277	0.602595	0.575015	0.701935	0.59439	0.676925	0.402255	0.647485	0.708245	0.542315	0.47123	0.53622	0.24705	0.25592	0.37974	0.499145	0.41561	0.463085	-0.01706	0.140465	-0.02766	0.037115	-0.159895	0.003075	0.565435	0.006445	0.15169	0.2498	-0.07258	0.13311	0.15225	0.278555	0.41002	0.265765	0.044115	0.3372	-0.06089	-0.13404	0.14588	0.120075	-0.11634	0.16283	0.109855
YOR365C	-0.11324	-0.11944	-0.00165	0.2452	-0.12535	-0.2174	0.00087	0.049865	0.255275	0.291375	-0.01215	0.096255	-0.003105	0.176295	0.474365	1.35102	0.09003	0.35686	0.95839	0.88153	0.30897	1.00127	0.92839	0.699035	0.95079	1.0334	0.4975	0.453355	0.815825	0.794455	0.557555	0.259005	0.86375	0.48075	0.42246	0.52232	0.66242	1.1281	0.69264	0.508535	0.595115	0.65088	0.45569	0.49361	0.98657	0.455005	0.8097	0.5363	0.632595
YNR030W	0.24051	0.30726	0.26837	0.30057	0.40407	0.15627	0.30321	0.234005	0.489105	-0.387925	0.32874	0.318085	0.048665	-3.5e-05	0.096935	0.122725	0.44283	0.34959	0.06568	-0.28393	-0.22872	0.051055	0.13823	-0.089185	0.32525	-0.175465	0.49216	0.414115	-0.125505	0.547585	-0.580555	-0.244715	-0.03426	-0.36425	-0.08026	-0.37078	-0.12945	-0.291545	0.33414	-0.068245	0.064035	0.30844	0.45369	0.77222	-0.24375	0.419145	0.47397	0.07713	0.213575
Q0055	0.18153	0.18951	-0.28098	0.74644	-1.12219	0.19514	-0.22997	1.81505	-0.914945	0.760775	-1.2328	1.49883	-0.305275	0.768285	0.621545	-0.083185	0.97945	0.29912	-0.8625	-0.01327	-0.33746	-0.300125	-1.06857	-0.355235	-0.55415	0.412235	-0.92219	-0.522005	0.148865	-0.180665	-0.910325	-0.520055	-0.16323	0.00455	-0.70359	-0.42352	-0.58656	1.37204	-0.57241	0.009845	-0.364225	-0.82438	-0.54827	0.35028	-0.74118	-0.022475	-0.40223	-0.21051	-0.061975
YBR265W	-0.5753	-0.80986	-0.54988	-0.61352	-0.16549	-0.83597	-0.18331	-0.231055	-0.746325	-0.340585	-0.59176	-0.321205	-0.463285	-0.384785	-0.230335	0.072295	-0.12802	0.14821	-0.68627	-1.18792	-0.87773	-0.862305	-0.62451	-0.491845	-0.66619	-1.08681	-0.32109	-0.699115	-1.10817	-0.456005	-0.751125	-0.874995	-0.8782	-0.63246	-0.83569	-0.93608	-0.5578	-0.968595	-0.63623	-0.651255	-0.377315	-0.42839	-0.36594	-0.62063	-0.62467	-0.881195	-0.41694	-0.78403	-0.284215
YGL131C	-0.13816	0.09523	-0.26831	-0.12682	-0.35962	0.05839	-0.30151	-0.049285	-0.164195	-0.066345	-0.323	-0.119415	-0.236185	-0.002095	-0.284145	-0.081805	-0.22811	-0.20229	-0.22332	0.02766	-0.11544	0.297565	-0.2721	-0.016925	-0.05112	0.145175	0.00585	-0.151875	0.093975	-0.155175	-0.820605	-0.150285	-0.04549	0.20065	-0.40193	-0.29418	-0.09618	0.042105	0.07914	0.067915	-0.246695	0.00999	-0.24269	0.34489	-0.34096	0.231895	-0.3531	-0.02889	-0.019345
YDL162C	-0.76175	0.10603	-0.3853	-0.21965	-0.54944	-0.71805	-0.40614	-0.493655	-1.31353	-0.502265	-0.31814	-0.572555	-0.114095	-0.555065	-0.396485	0.304135	-0.20217	0.14144	0.20212	-0.21493	-0.08411	-0.519455	-0.64564	-0.001255	-0.31969	0.160365	0.58843	0.189555	-0.147945	0.627855	0.546695	0.724525	0.2192	0.30607	0.30373	0.25628	-0.35366	0.143395	-0.8646	-0.161755	-0.203025	0.09033	0.08416	0.15871	0.07879	0.122535	0.09003	0.06529	-0.179305
YHR033W	-0.27736	-0.20012	-0.42451	-0.35627	0.03456	-0.17038	2.27904	2.08306	1.5152	2.72083	2.35541	2.10569	2.8032	2.82335	2.5656	3.08586	2.74099	2.9594	0.01979	-0.69179	0.03869	-0.470095	0.93528	1.47666	1.79775	0.408585	1.31307	0.813525	-0.196395	1.50802	2.51681	2.40279	2.01443	2.01536	-0.32681	-0.19084	0.82266	-0.044215	1.26227	1.40207	0.194495	0.7475	1.89068	2.81459	0.80607	1.82532	1.92112	0.80332	0.838845
YNR040W	-0.19725	-0.28188	-0.21424	-0.14635	0.24139	-0.53385	0.1232	0.012815	-0.220625	-0.075635	0.10861	-0.274525	-0.170005	-0.128435	-0.070945	-0.138255	0.1791	-0.0966	0.17131	-0.16332	0.04374	-0.202325	-0.05429	-0.095265	0.06882	-0.497895	-0.01154	0.079705	-0.334725	-0.032105	0.002515	-0.340025	-0.32201	-0.40925	0.01108	-0.12061	-0.27137	-0.448655	-0.57813	-0.191285	-0.060525	-0.2316	0.10504	-0.41144	-0.1952	-0.217205	0.37292	-0.21606	-0.397875
YDR246W-A	2.30583	1.05342	1.03732	0.80437	1.35867	0.43736	1.15214	0.615045	0.921425	0.892265	0.89993	0.166395	1.30329	0.867995	1.15322	0.655105	0.73036	1.14857	1.34987	0.16383	0.7636	-0.121525	0.79388	-1.64586	1.72722	0.860175	2.62905	1.28211	1.24789	0.730865	0.911145	-0.316625	1.31413	0.98482	1.71775	-2.68636	1.21657	0.162185	1.03601	-1.35888	1.31553	1.09951	2.76761	-0.01999	1.33745	0.184005	1.92334	0.7471	1.43185
YNR034W	2.15027	2.09821	2.12655	1.99954	2.4568	2.23566	1.8918	2.12248	1.62454	1.65985	1.51387	1.70747	1.0696	1.11193	1.37207	1.10641	1.35953	1.35223	2.41762	2.22625	1.90633	2.10435	2.43468	1.75567	2.16456	1.73364	2.6528	2.49394	2.5659	1.96469	1.94078	1.9622	1.7187	1.58003	1.93476	1.96499	2.30803	2.30265	2.04499	1.78201	2.35637	2.46939	2.15889	1.79127	2.26304	2.08201	2.3881	2.55924	1.93108
YEL076C	-0.79491	-1.25588	-0.38748	-1.19948	-0.33301	-1.46584	0.0165	-0.064725	-0.086725	-0.497435	-0.22904	-0.174585	-0.811335	-0.462975	-0.722705	-0.448665	-0.14165	-0.62808	-0.78319	-1.33832	-0.41197	-0.417215	-0.48208	-0.856025	-0.61626	-1.24063	-0.70467	-1.46869	-0.802435	-1.24347	-1.33411	-1.17446	-0.26611	-0.50228	-0.68253	-1.10659	-0.40137	-0.690095	-0.16	-0.736655	-1.20934	-1.06648	-0.58525	-1.03629	-0.72999	-1.33988	-0.25026	-0.56283	-0.602065
YHL046W-A	0.39428	-0.12606	0.00509	-0.97718	-0.67521	-0.39189	0.29908	-0.294005	-0.664855	-0.189665	0.58933	-0.155885	-0.282355	-0.463915	-0.368705	0.456595	0.14617	0.01503	0.52357	0.37733	0.90033	0.560465	0.6538	-2.09315	-0.12142	-0.020045	0.24989	0.949205	0.366025	0.119675	0.592485	-0.465805	0.39098	-0.11801	0.26407	-0.6648	0.3593	-0.135015	0.61694	-0.107895	-0.076945	0.03366	-0.22083	0.59629	0.07816	0.595355	0.30289	-0.43828	0.888995
YDL071C	-0.34766	0.42236	-0.52188	-0.11353	0.24017	0.21805	0.41026	0.363645	0.502135	1.00578	0.50544	0.237655	-0.246585	-0.064965	0.296095	0.622565	0.32178	0.98185	0.06824	-0.33149	-0.00126	0.059025	0.75966	-0.270595	0.86902	0.328575	0.45547	0.235465	-0.558455	0.070395	-0.321495	0.481885	0.8083	0.17698	0.36573	0.33271	0.93673	0.489235	0.83988	-0.647975	0.470065	0.79968	0.56454	0.60757	-0.11273	0.041015	0.31628	0.1915	0.510365
YOR173W	4.60327	4.41512	4.41065	4.21396	4.5547	5.16449	5.58155	5.39912	4.77959	5.68546	4.67243	5.27107	3.17354	4.11677	4.31586	4.32953	4.48443	4.80089	4.68604	5.10656	5.3837	5.18436	4.75521	4.33803	4.6861	4.84586	5.39749	5.05373	4.37617	3.21538	5.29918	3.88743	4.84512	3.36564	3.9271	4.0921	4.66473	4.79458	4.20338	4.35259	4.99327	4.65182	4.07367	3.84371	5.54573	3.61157	5.60963	5.09943	4.87802
YOR337W	-0.83825	-1.09607	-0.95456	-1.11489	-0.81421	-0.97592	-1.85394	-1.82662	-1.91318	-2.05035	-2.10878	-1.50138	-0.970875	-0.926375	-0.933575	-0.795875	-1.12384	-0.9897	-0.90635	-1.15147	-1.56308	-1.29468	-1.2452	-1.33458	-1.47457	-1.30127	-1.33716	-1.28809	-0.956975	-1.23077	-2.18919	-1.42254	-1.12305	-0.75885	-0.87214	-0.94008	-1.11932	-1.30774	-1.19964	-1.84204	-1.79479	-1.34314	-1.45789	-0.95777	-1.15038	-1.41646	-1.70314	-1.85186	-0.738125
YNL181W	-0.17233	-0.12681	-0.16667	-0.13211	-0.3576	-0.21721	0.05937	0.300835	0.122385	-0.006945	0.12237	0.176625	0.134255	0.314675	0.163605	0.119105	0.20603	0.24106	-0.2937	-0.1675	-0.06943	-0.205375	-0.3423	-0.017595	-0.38551	-0.010035	-0.60599	-0.279235	-0.441405	0.070005	0.070595	-0.185875	-0.19435	-0.0125	-0.28739	-0.21338	-0.35116	-0.248945	-0.10034	0.188085	-0.106725	-0.51787	-0.34206	-0.40454	-0.40659	-0.002675	-0.37423	-0.3738	-0.348835
YGL104C	1.99245	2.12314	1.99119	2.28214	2.38165	2.57167	2.56073	2.76783	2.5985	2.69546	2.58491	2.64536	1.71888	1.82334	1.88108	1.93119	2.2806	2.36769	2.03872	1.97321	1.67941	1.59753	1.79339	1.71883	2.34528	1.91073	2.2698	2.27106	2.02752	2.33004	2.53178	2.98767	1.57022	1.48651	2.12844	1.92342	1.78394	1.81432	2.53565	2.20138	2.26498	2.77202	1.56375	1.71494	1.83566	2.23271	2.24083	2.10652	1.8497
YDR164C	-0.34782	-0.63335	-0.71012	-0.68755	-0.4398	-0.52097	-0.15141	-5e-06	-0.321935	0.032385	-0.24728	-0.238695	-0.087755	-0.170685	-0.358375	0.097505	-0.50776	-0.23367	-0.26143	-0.32222	-0.12063	-0.150195	-0.45992	0.115525	-0.34975	-0.295035	-0.55872	-0.508125	-0.843345	-0.478805	-0.228045	0.036925	-0.46978	0.08921	-0.78825	-0.43217	0.08191	-0.542115	-0.39801	-0.164105	0.038325	-0.60643	-0.80273	-0.28096	-0.4536	-0.483585	-0.31662	-0.51458	-0.448515
YGR243W	3.17854	3.2254	2.93291	2.97823	3.06748	3.14543	3.61844	3.88585	3.69658	3.78812	3.54302	3.61449	1.17752	1.10136	1.50351	1.48199	1.74562	1.47037	4.07867	3.44953	3.52634	2.94226	2.9115	2.6054	4.68045	4.4227	3.79846	3.09111	3.30097	3.3343	3.77307	3.68094	3.72523	2.98477	3.09866	3.25968	4.1833	3.79408	3.44693	2.63061	4.522	4.3131	3.93642	2.33561	3.64545	3.69096	4.01933	4.01557	2.45819
YOR107W	-0.89911	-0.48432	-1.09507	-0.85176	-1.16233	-0.49761	-1.03014	-0.647905	-1.24769	-0.915785	-1.17914	-1.32245	-1.42179	-0.909875	-1.64586	-1.37543	-1.47424	-1.35052	0.18261	0.14968	-2.22072	-1.74877	-0.38221	-0.415995	-0.56116	-0.296395	-1.58443	-1.99042	-0.862435	-1.10936	-0.192085	-0.013035	-0.54755	0.49219	-0.46516	-0.47407	-0.56444	-0.480185	-1.14945	-1.44945	-1.21897	-0.2493	-1.12058	-1.34331	-1.4908	-1.1041	-0.66618	-0.017	-1.11658
YDR464W	-1.27891	-0.89298	-1.39047	-1.43509	-1.30978	-1.21911	-1.81567	-1.95215	-0.961155	-1.31804	-1.26546	-1.35508	-0.745755	-1.24594	-1.13908	-1.00361	-1.2761	-1.4461	-1.63763	-1.40962	-0.65058	-1.13888	-1.12284	-0.881885	-1.14775	-1.06662	-1.35664	-2.01099	-1.54516	-1.36834	-0.727545	-1.39604	-0.82404	-1.00363	-1.57647	-1.23796	-1.24621	-1.05397	-1.22225	-1.09546	-1.3537	-1.3491	-1.40715	-0.72552	-1.47396	-1.06675	-1.60632	-1.98186	-1.10224
YGR210C	0.10957	-0.20627	-0.09755	-0.1476	-0.11566	-0.28305	-0.70302	-0.475385	-0.459245	-0.770345	-0.61506	-0.611895	-0.230155	-0.125805	-0.129315	-0.456795	-0.31954	-0.46584	-0.48599	-0.29733	-1.12651	-1.11505	-0.35541	-0.851385	-0.75738	-0.621115	-0.97225	-0.502785	-0.037485	-0.604065	-0.789435	-0.090175	-0.5795	-0.21094	0.06588	-0.25641	-1.1276	-1.02076	-0.00136	-0.529405	-0.681075	-0.56137	-0.60076	-0.57939	-1.15642	-0.736275	-0.42994	-1.24939	-0.584135
YOR168W	-1.48196	-1.42831	-1.62584	-1.32685	-1.52274	-1.56936	-1.8074	-1.56181	-1.84112	-1.81669	-1.96385	-1.63891	-1.18813	-1.05046	-1.19556	-1.07397	-1.17094	-1.29976	-1.42439	-1.35749	-1.77205	-1.66837	-1.36231	-0.827215	-1.57828	-1.49141	-2.16906	-2.05218	-1.46782	-1.48128	-1.29456	-1.52131	-1.6728	-1.03397	-1.693	-1.39486	-1.42234	-1.4565	-1.47555	-1.35441	-1.5114	-1.85376	-1.69011	-1.53328	-1.73265	-1.77971	-1.69515	-1.51329	-1.99572
YLR012C	1.05376	1.15204	1.06321	1.24364	1.27457	1.12054	0.06226	1.17895	0.691005	0.680805	0.79488	0.279485	0.820305	0.802215	0.680535	0.730665	0.85244	0.39509	1.66257	1.4441	0.78999	0.929195	0.63081	1.22242	1.45046	1.33082	0.69738	1.1138	1.7893	0.731995	0.839345	0.797915	1.11414	0.34403	1.6756	1.04371	1.08724	1.59312	0.71659	0.936365	1.66284	0.98535	1.23497	1.45176	1.91861	1.67508	0.87658	1.57275	1.51099
YNL002C	-2.98389	-2.90348	-2.99408	-2.85974	-2.89042	-3.29547	-3.06514	-4.05576	-2.74321	-3.31224	-3.30515	-2.78329	-2.70079	-3.07518	-2.98263	-2.80366	-3.02293	-3.19555	-2.81146	-3.29195	-3.14874	-3.3664	-2.5197	-2.51616	-3.06325	-2.69991	-3.10658	-3.03578	-2.91792	-2.27656	-2.31178	-2.87988	-3.29854	-2.01295	-2.55647	-2.67514	-2.8313	-2.99116	-2.80506	-2.67022	-3.1407	-2.79335	-2.72425	-2.33563	-3.35549	-3.24975	-3.03727	-4.23079	-3.37487
YLR054C	1.08607	0.70279	0.68222	0.7664	0.23681	0.5033	0.19771	0.257755	0.520775	0.747805	0.48305	0.587045	0.103505	0.099205	0.133305	0.025515	-0.08459	0.23952	1.17079	0.90003	1.09342	0.773955	0.80972	0.732715	0.57699	0.547365	0.96545	0.913315	1.05404	0.766035	0.733015	0.905905	0.91894	0.11454	0.96143	0.87264	0.53711	0.916105	0.55174	0.765325	0.633475	0.96479	0.7105	1.00195	1.14231	0.751475	0.64336	0.8624	1.06855
YHR193C	-0.90534	-0.97088	-1.74243	-0.93088	-0.71655	-0.95529	-0.29208	-1.04273	-0.420515	-0.227795	-0.512	-0.495135	0.060625	-0.163685	-0.085515	-0.096845	-0.21638	-0.30665	-0.28219	-0.5307	-0.67178	-0.795875	-0.6784	-0.669495	-0.90713	-0.738175	-1.67256	-1.08736	-0.836245	-0.979605	0.445395	-0.973875	-0.84275	-1.27767	-0.7043	-0.83076	-0.70036	-0.593355	-1.16103	-0.484335	-0.877185	-2.21374	-0.71089	-1.12782	-1.29897	-1.26951	-0.9024	-1.33462	-1.0371
YNL294C	-0.16621	0.25763	0.31967	0.18409	-0.05564	-0.06549	0.1759	0.102505	0.246195	0.195255	0.21943	0.196425	-0.334345	-0.242415	-0.203885	-0.057215	-0.21655	-0.22497	-0.1593	-0.44997	-0.32334	-0.334395	-0.00885	-0.543335	0.20603	-0.353925	0.13496	0.210715	0.013445	0.041335	-0.194775	0.034135	-0.07225	-0.26709	0.17168	-0.22127	-0.22231	-0.296535	0.13704	-0.334545	-0.192165	0.0307	0.2222	0.28761	-0.20477	-0.315535	-0.15351	-0.242	-0.199535
YOR005C	0.76437	0.81435	0.46935	0.48553	0.71874	1.23754	0.69598	0.986255	0.764795	0.779975	0.68502	0.591225	0.425985	0.811355	0.437535	0.718425	0.46661	0.90902	0.61029	0.8787	0.94386	0.744165	0.32619	0.730115	0.31032	0.889285	0.725	0.798675	0.624485	0.420125	0.989235	1.46928	0.65196	0.83165	0.53038	0.80268	0.55258	0.882325	0.56089	0.526815	0.648815	0.64428	0.22469	1.02053	0.64973	0.573145	0.65957	0.94321	0.671315
YPR147C	-0.06297	0.21868	0.05613	0.30481	-0.03856	0.06282	0.01456	0.457375	0.316515	0.367635	0.24761	0.057515	-0.167585	0.193035	-0.112215	0.088485	-0.15775	0.35171	0.10497	0.02371	-0.32764	-0.063185	0.03886	-0.378615	0.23586	0.020455	0.39049	0.265495	0.026555	0.377025	-0.393895	0.159035	-0.2922	-0.42081	0.12227	-0.01401	-0.02442	0.057335	0.05093	-0.182355	0.270445	0.42856	0.1087	0.08518	-0.04546	0.226935	-0.04375	0.26106	0.040975
YBR092C	-2.24017	-2.41991	-1.94825	-2.24632	-2.13975	-2.76901	-2.26833	-2.39479	-2.02066	-1.97077	-2.36411	-2.26756	-2.77666	-2.93824	-2.45987	-2.32086	-2.62319	-3.06286	-2.29586	-1.87039	-3.31567	-2.85162	-2.32797	-2.59145	-1.8887	-2.194	-2.44177	-2.48047	-1.08465	-1.56726	-2.44026	-2.108	-3.00633	-2.39643	-2.33088	-1.4166	-2.33352	-2.95879	-2.41245	-2.8874	-1.99168	-1.70119	-1.24323	-1.54374	-2.55048	-2.48331	-2.43274	-2.97883	-2.71204
YOR242C	-1.20858	-0.87442	-1.34964	-1.27712	-1.49752	-0.61575	-0.80741	-0.875735	-0.856495	-0.630925	-0.94348	-0.851915	0.176155	0.314895	-0.128545	-0.109885	-0.0139	-0.11428	-0.91406	-0.42617	-0.61979	-0.035125	-0.1949	0.104815	-0.72846	-0.344555	-1.11538	-0.399525	-0.637455	-0.600385	-0.261995	-0.156475	-0.84458	-0.06734	-1.0876	-0.04927	-0.63354	-0.658135	-0.56992	-0.566175	-0.720835	-0.95544	-1.17227	-0.43355	-0.57309	-0.312595	-0.66262	-0.84339	-0.555915
YJL028W	0.47236	1.16477	0.28457	-0.04268	0.23691	0.05452	-0.223	-0.325065	0.135805	0.270285	0.31016	0.462525	0.301615	-0.535295	-0.310905	-0.133915	0.81673	0.16663	1.36091	0.38529	0.1836	0.024865	0.61633	0.823865	0.52273	0.895145	0.24259	0.915295	0.590095	0.247235	0.498035	0.177055	0.41917	1.25205	1.37376	0.46928	0.75476	0.086865	0.56809	0.582545	0.491685	1.52391	0.69123	0.85817	1.13307	0.445735	0.02059	0.18257	1.211
YLR077W	0.11359	0.17123	0.09594	-0.03715	0.05448	0.27492	0.32127	0.430665	0.451355	0.262455	0.39322	0.398895	0.527945	0.559325	0.548155	0.381485	0.66714	0.48468	0.26049	0.37498	0.49356	0.234175	0.38402	0.311675	-0.2111	0.029375	-0.27165	0.019345	-0.127345	-0.058795	-0.040805	0.026935	-0.14158	-0.07634	-0.01643	0.2609	-0.14942	0.085865	0.10937	0.292535	-0.097115	-0.22986	-0.19685	-0.12894	-0.1192	0.007575	-0.07305	-0.0955	0.130705
YCR081W	-0.21551	-0.04989	-0.16475	-0.0365	-0.03805	0.12613	-0.07003	0.265015	-0.253135	-0.023025	-0.27224	-0.083085	-0.135615	0.303725	0.081775	0.101225	0.14597	0.19049	-0.05047	-0.15747	-0.2547	0.061885	-0.29804	-0.027755	-0.16006	0.048185	-0.02658	-0.324965	-0.252235	-0.363025	-0.493545	-0.028265	-0.19215	-0.14194	-0.55803	-0.26248	0.21189	0.183565	-0.33767	-0.301955	-0.063165	-0.11066	-0.44022	-0.12009	-0.10171	-0.340605	-0.33325	0.11359	-0.297805
YOR396C-A	-0.64267	-0.51113	-0.63311	-0.58066	-0.08551	-1.16015	0.31286	-0.061375	0.651345	0.382585	0.38388	0.402855	-0.266495	-0.269845	-0.421465	-0.477565	-0.28263	-0.16275	-0.57197	-0.88903	-0.0729	-0.522315	0.00558	-0.221575	0.43105	-0.263025	0.03883	-1.05655	-1.2867	-0.697455	-1.15671	-0.695535	0.53109	0.73426	0.09039	-0.26458	0.76644	0.144865	0.82062	0.218205	-0.782615	0.26042	0.01435	-0.17393	-0.05171	-0.990495	-0.26577	-0.29047	-0.146865
YLR458W	0.46121	-0.14385	0.41172	-0.01826	-0.15884	-0.04107	0.4733	-0.078495	0.247315	0.229145	0.07463	0.332075	0.518395	0.250885	-0.178595	-0.200685	0.4451	-0.23832	1.324	0.79418	0.55777	0.612895	0.89988	0.411965	0.3213	0.930785	0.48355	0.618115	0.686585	0.691315	0.514925	0.010635	0.48299	0.49751	0.76351	0.17708	0.91117	0.644845	0.72226	0.508045	1.14097	0.69412	0.4315	0.99724	0.85174	0.029145	0.16888	-0.17371	1.00528
YBL040C	0.88107	1.11866	0.93609	1.01432	0.73037	0.78026	0.8974	1.23777	1.33292	0.951345	1.17248	1.3747	0.740615	0.815305	0.937735	0.564415	0.86256	0.95535	0.62494	0.46192	0.47096	0.162395	0.37096	0.010445	0.62368	0.264715	1.16019	1.20637	0.605565	1.28167	0.322765	0.591415	0.60025	0.44196	0.73245	0.70259	0.70078	0.553725	0.4469	0.033285	0.656585	0.94444	1.07189	0.78327	0.73037	1.03866	0.53515	0.6288	0.833155
YJR127C	1.61773	1.69501	1.86031	1.50118	1.79015	1.60959	1.74145	1.8939	1.69271	1.6826	1.35569	1.7028	1.33821	1.63725	1.57509	1.37521	1.66186	1.84301	2.0653	1.88246	1.26448	1.22994	1.74691	1.2246	2.24584	2.24098	1.71084	1.12658	2.25301	1.39275	0.898705	1.26185	2.45086	2.23642	2.20106	1.94237	1.85265	2.01864	2.30747	1.47897	1.79198	1.61899	2.09068	1.60827	1.42356	1.43284	1.98485	1.8533	1.2436
YJL176C	-0.67944	-0.61206	-0.7877	-0.87653	-0.91774	-0.62987	-0.71186	-0.751335	-0.365375	-0.575785	-0.59462	-0.605825	-0.256635	-0.587485	-0.452655	-0.615975	-0.6814	-0.5847	-0.81305	-0.90761	-0.8037	-0.617635	-0.58144	-0.630525	-0.96906	-0.822735	-0.82997	-1.22392	-0.836375	-0.886305	-0.632385	-0.837985	-0.58858	-0.54962	-0.72206	-0.72812	-0.80994	-0.661395	-0.53073	-0.377655	-0.966375	-0.73915	-1.11842	-0.50102	-0.91147	-0.683585	-1.13143	-1.0089	-0.740725
YLR453C	0.03665	0.00789	-0.10054	-0.13861	-0.1966	-0.07534	-0.0721	0.245235	-0.011925	0.411555	-0.0351	0.298715	0.378985	0.491175	0.070295	0.356645	0.33303	0.5801	0.01716	-0.05696	0.19284	0.258955	-0.46487	-0.093285	-0.29254	0.190135	-0.16762	-0.111655	-0.365525	-0.229075	0.300005	0.232025	0.02987	-0.02571	-0.25482	-0.0985	0.33224	0.034525	-0.15419	-0.036295	0.359815	0.09912	-0.40347	-0.86262	-0.03581	-0.330605	-0.16965	0.24479	-0.091655
YCR007C	0.30822	0.72285	0.81262	0.7472	0.49382	0.60574	-0.05889	0.582305	0.510775	0.789275	0.7634	0.500575	0.272715	0.595325	0.620225	1.01595	0.2138	0.60542	0.82757	0.81842	0.73866	0.528395	0.4403	-0.008295	0.24054	0.691865	0.5548	1.77309	1.20812	0.708665	0.732855	0.640735	0.87667	2.1762	0.16244	0.78646	0.61119	0.199895	0.16352	0.993485	0.363505	0.43143	0.56718	0.54215	0.43759	0.830175	0.35078	0.97794	0.491785
YHR128W	-1.78454	-2.06778	-1.78399	-1.75125	-1.95805	-1.75252	-1.86183	-2.46264	-2.41511	-2.27144	-2.30037	-2.16121	-1.91552	-1.81862	-1.58157	-1.54322	-1.60731	-1.74107	-2.19139	-2.70488	-2.48095	-2.2472	-1.95903	-1.95593	-1.53715	-1.87965	-2.20529	-2.29791	-2.35005	-1.82117	-2.48206	-2.34599	-2.17593	-2.07772	-2.0028	-1.95781	-1.65477	-2.17305	-1.64738	-1.96165	-1.54323	-1.66916	-1.47614	-1.70242	-2.42901	-2.43439	-1.60349	-2.63888	-2.25603
YOR297C	0.07381	0.07421	0.36777	0.01397	0.54216	0.04304	0.15814	-0.378575	-0.120535	0.100315	-0.07203	-0.314945	-0.484585	-0.394805	-0.189515	0.212435	-0.27874	0.07036	-0.47346	-0.79863	-0.39038	-0.033545	-0.27582	-0.278265	0.55215	-0.303815	0.07945	-0.019325	-0.133025	0.205945	-1.05066	-0.305145	-0.15794	0.06946	-0.57031	-0.51726	0.11507	-0.019645	-0.12416	-0.301025	-0.032645	0.39797	0.07757	-0.04359	0.04801	-0.239845	0.16593	0.27566	-0.258985
YDR225W	-0.76813	-0.74999	-1.07285	-0.61313	-0.71594	-0.79612	-0.84952	-1.53571	-1.28771	-0.964225	-1.25548	-0.991205	-1.60845	-1.66894	-1.45592	-1.34025	-1.78465	-1.63497	-0.70894	-0.99983	-1.4734	-1.26645	-1.30022	-1.06557	-0.66356	-0.307745	-1.14983	-1.44758	-0.943955	-1.05808	-0.821735	-0.841995	-1.10586	-1.22785	-0.95903	-0.96769	-1.2806	-1.29913	-0.88588	-0.753945	-1.40311	-1.25392	-0.55497	-1.3952	-1.75068	-1.50029	-1.96207	-1.66615	-1.46646
YPR020W	-0.22777	-0.33991	-0.44677	-0.33869	-0.33979	-0.55209	-0.52911	-0.671355	-0.400665	-0.410165	-0.2184	-0.437195	-0.902165	-0.970125	-0.917835	-1.00507	-0.95497	-1.15202	-0.46498	-0.49712	-0.43574	-0.886425	-0.91008	-0.477795	-0.24785	0.104785	-0.76493	-0.565805	-0.255125	-0.457785	-0.221405	-0.942955	-0.12852	-0.32373	-0.24195	-0.7197	0.07195	-0.338845	-0.74491	-0.289025	-0.391315	-0.66549	-0.04927	-0.69192	-0.50028	-0.322895	-0.37425	-0.91585	-0.847445
YJR003C	-0.5003	-0.57574	-0.52008	-0.69111	-0.56797	-0.53867	-1.35341	-1.737	-1.52633	-1.68371	-1.66541	-1.38533	-1.42912	-1.17307	-1.57988	-1.23056	-1.3378	-1.37204	-0.53928	-0.95094	-1.18064	-0.849665	-1.38176	-1.06905	-1.20738	-0.859495	-1.51824	-0.919595	-0.723125	-0.889765	-1.44169	-0.774715	-0.97052	-0.70962	-0.92045	-0.88945	-0.7381	-0.940425	-1.12389	-1.18613	-1.75561	-1.35126	-1.19116	-0.49544	-1.24468	-0.975275	-1.6982	-1.72339	-0.945695
YIL101C	2.04968	2.44707	2.28276	2.31563	2.31648	2.27852	4.04806	3.56678	3.09949	4.04627	3.50337	4.17955	1.60299	1.89281	1.76574	2.73401	1.82364	2.36587	2.69731	2.3404	3.87608	3.31133	3.43795	2.16228	3.51107	3.04752	3.7682	3.60879	2.45031	2.46409	3.61727	3.5381	4.37453	3.52653	2.30987	1.65213	3.30554	2.85899	3.9095	2.79625	2.98488	3.04814	2.65135	3.07025	2.05055	2.14065	2.64482	2.19665	2.25798
YHR136C	-0.97244	-0.86265	-0.46971	-0.61813	-1.01704	-1.27819	1.75296	1.10523	1.86433	2.10677	1.95775	2.17921	4.17502	4.41997	4.13065	4.39992	4.86804	4.38491	-0.20744	-0.71403	-2.12847	-1.89716	0.62573	1.29218	-0.59249	-0.495495	-0.92876	-1.04313	0.098735	-0.421835	-0.052865	-0.707255	1.14705	0.82476	-0.15307	-0.59549	1.10614	0.674995	1.01396	1.57676	0.850265	1.64078	1.53617	1.45987	0.91729	-0.542425	0.95566	1.53204	0.511375
YPL189W	-0.29294	0.30304	-0.04498	0.11976	-0.0484	0.29221	0.21483	-0.027485	-0.199235	-0.043675	-0.34988	-0.100005	-0.787395	-0.577185	-0.995595	-0.197865	-0.82059	-0.7026	-0.43212	-0.33071	0.03082	0.678755	0.02534	0.049275	0.537	0.635715	0.50327	1.0557	0.085905	1.00839	-0.931895	0.791635	-0.47447	0.52796	-0.52097	-0.41663	0.36028	0.270385	-0.08241	0.016755	-0.169715	0.47993	0.24773	0.92571	0.20379	0.620045	-0.02312	0.0483	0.336155
YPR114W	-0.45021	-0.30516	-0.45593	-0.43702	-0.2111	-0.63953	-0.59791	-0.586235	-0.581735	-0.815695	-0.57271	-0.711615	-1.14206	-1.14654	-1.08886	-0.853405	-0.94304	-1.02573	-0.71838	-0.95597	-0.55903	-0.502105	-0.35364	-0.355955	-0.21731	-0.404455	-0.48767	-0.751695	-0.544415	-0.472395	-1.16813	-0.833255	-0.50077	-0.51043	-0.44852	-0.59067	-0.21411	-0.557055	-0.41307	-0.547805	-0.202405	0.18389	-0.42178	-0.38412	-0.99379	-0.423505	-0.53661	-0.77897	-0.467385
YJL056C	-0.72464	-0.65284	-0.75258	-0.96781	-0.75606	-1.13978	-0.83279	-0.715405	-0.715975	-0.545655	-1.00029	-0.512805	-0.535075	-0.204065	-0.444165	-0.504135	-0.74568	-0.2931	-0.12711	-0.27087	-1.26668	-0.906505	-0.89775	-0.784275	-0.9227	-0.876555	-0.64857	-0.977375	-0.637635	-0.838605	-1.14721	-0.408285	-1.02765	-0.49769	-0.17758	-0.41648	-0.40111	-0.455445	-0.99064	-0.768935	-0.310065	-0.42123	-0.0909	-0.48608	-0.69783	-0.660435	-1.04921	-0.52678	-1.20945
YDR482C	-0.78488	-0.29956	-0.68759	-0.98612	-1.04031	-1.18863	-1.12942	-1.55324	-0.823265	-1.18171	-0.84208	-1.28651	-1.00167	-1.21873	-0.940875	-1.52639	-1.56383	-1.29925	-1.49471	-1.11955	-0.7993	-1.316	-0.83398	-1.51252	-1.15661	-0.809795	-1.57632	-1.25825	-1.82909	-0.895755	-0.406885	-1.46026	-1.46553	-0.98921	-1.12615	-1.08809	-1.67123	-1.37898	-0.93256	-1.21432	-1.70993	-1.25302	-1.74402	-0.80884	-1.34461	-1.11835	-1.29076	-1.93147	-1.50038
YPL247C	2.32244	1.79073	2.24443	1.84112	2.37122	1.95251	3.22088	3.61113	2.45328	3.30427	2.85749	3.31007	2.09224	2.11401	2.71678	2.62364	2.80929	3.23269	2.63495	1.98949	3.04782	2.70995	2.78471	1.41789	3.23785	2.82717	3.31436	1.98823	1.73134	1.74994	2.87724	2.19427	2.20373	1.49896	1.9566	1.46901	2.80874	2.2904	2.4865	1.6265	3.17054	3.33615	2.35028	1.66852	2.36404	1.76486	3.18518	3.34065	2.7816
YBL058W	0.33124	0.48441	0.61869	0.50296	0.52803	0.5023	0.88892	1.05686	0.857775	0.656335	0.96541	1.13803	1.19599	1.22778	1.31428	0.658155	1.28866	1.2956	0.23972	0.49375	0.49354	0.408965	0.7115	0.819045	0.25064	0.206035	0.29565	0.244015	0.108455	0.465795	0.796575	0.498695	0.07401	0.14294	0.68079	0.61457	0.15476	0.259545	0.6235	0.910765	0.383165	-0.30201	0.32823	0.26623	0.49954	0.417645	0.33998	-0.24865	0.250335
YJL122W	-2.92236	-2.82321	-2.6491	-2.89964	-2.73702	-3.22619	-3.07488	-4.17228	-2.7394	-3.6515	-3.3576	-3.05111	-2.6343	-3.28747	-2.80559	-2.40171	-2.99104	-2.88049	-2.50949	-3.1266	-3.12377	-3.22493	-2.39255	-2.69823	-2.93582	-2.69882	-3.00267	-2.40911	-2.62793	-2.44406	-2.17436	-3.18228	-3.48147	-2.74913	-2.2964	-2.78086	-2.88651	-3.08781	-2.50467	-2.83135	-3.17955	-2.61393	-3.04541	-2.56055	-3.26002	-3.15359	-3.12154	-4.02835	-3.30327
YKL107W	0.86285	1.14882	1.29453	1.24259	1.47432	1.53517	1.49018	1.93649	1.13767	1.94695	1.40466	1.77382	1.05577	1.2264	0.874195	1.59567	0.65816	0.7978	1.88955	1.69918	2.0745	2.06266	1.80671	1.66373	1.515	1.54729	2.19568	1.88914	0.908125	1.42247	2.2735	2.65246	2.78536	1.9093	1.37334	1.67309	1.82518	1.43681	1.06679	1.542	2.02053	1.5838	0.99013	1.66208	1.33775	1.40929	1.75816	2.50692	1.41074
YLL039C	3.37948	3.7004	3.56387	3.37653	3.62325	3.66197	5.34342	5.30602	5.19803	5.18156	5.13098	5.13385	4.78078	5.48628	5.36437	4.93309	5.43858	5.63932	3.95106	4.13016	3.81121	3.36137	3.56189	3.13692	3.1685	3.58102	3.85814	4.07951	3.97809	4.32547	4.40313	4.59811	4.14425	3.94544	4.1679	3.84543	3.71922	4.28418	3.76606	2.99161	3.84564	4.28413	3.94174	4.07962	4.81043	4.36862	3.90328	3.73835	4.79127
YCL017C	-0.66255	-0.46731	-0.47155	-0.28759	-0.41653	-0.56729	0.06329	-0.081505	-0.284585	-0.459455	-0.10626	-0.215755	-0.554735	-0.471655	-0.298795	-0.277315	-0.1713	-0.3462	-0.31917	-0.69139	-0.60757	-0.541925	-0.43648	-0.743165	-0.36409	-0.824865	-0.3935	-0.981555	-0.560695	-0.495475	-1.09779	-0.817855	-0.5698	-0.52062	-0.69295	-0.54258	-0.45213	-0.765375	-0.50746	-0.792025	-0.362865	-0.24024	-0.35584	-0.13511	-0.91817	-0.672325	-0.50454	-0.47929	-0.734515
YER085C	0.24588	0.26787	0.29494	0.21568	0.28227	0.61424	0.52607	0.130345	-0.060555	0.307735	0.05507	0.828095	0.240085	0.692915	-0.065295	0.335415	0.62929	0.41119	0.71737	0.73593	0.80881	1.24595	0.37629	0.879545	0.08725	0.423635	-0.19388	0.985685	0.560775	0.491155	0.063645	0.303315	0.94091	0.27826	0.2128	0.72678	1.00827	0.880355	0.47636	0.793905	0.112345	0.32285	0.11021	0.46185	0.46303	0.769345	0.22912	0.11453	0.530805
YMR186W	0.01587	-0.42522	-0.50874	-0.08645	-0.26084	-0.07867	0.2408	0.410015	0.190335	0.328155	0.07628	0.162345	0.558535	0.615995	0.654115	0.366335	0.4297	0.42966	0.412	0.59997	0.03596	0.067545	-0.06896	0.289685	-0.01499	0.354885	-0.57166	-0.136485	0.218975	-0.131295	0.379945	0.426245	0.52817	0.05606	0.25548	0.18073	0.05989	0.187775	0.21076	0.576365	-0.001685	-0.81333	0.11832	-0.33285	-0.20097	0.219235	-0.08382	-0.07882	0.350735
YCR065W	-0.49703	-0.72397	-0.44513	-0.56107	-0.25094	-0.54634	-0.24609	-0.307135	-0.855255	-0.315125	-0.58697	-0.257095	-0.023215	0.024885	-0.061085	-0.067165	0.22496	-0.03396	-0.58938	-1.12434	-1.21304	-0.848675	-0.48804	-0.284915	-0.94331	-1.21246	-0.35212	-0.892375	-0.875895	-0.774685	-0.827795	-0.518855	-1.03719	-0.79526	-1.02278	-0.74171	-0.7041	-1.29646	-0.32048	-0.543095	-0.683155	-0.17377	-0.5179	-0.52478	-0.66482	-1.05191	-0.63827	-0.60789	-0.790815
YFL045C	-0.77028	-0.75631	-0.84662	-0.45473	-0.55286	-0.96053	-0.35235	-0.397615	-0.410135	-0.551775	-0.67251	-0.451385	-0.276965	-0.203875	-0.095125	-0.161725	-0.04846	-0.06436	-0.84465	-0.98406	-0.533	-0.640165	-0.84719	-0.678325	-0.14706	-0.895635	-0.48635	-1.00287	-0.675195	-0.245845	-1.22839	-0.766065	-0.71641	-0.82046	-0.61988	-0.78586	-0.34602	-0.884175	-0.61389	-0.557985	-0.747895	-0.37592	-0.58719	-0.72493	-1.27928	-0.415395	-0.71845	-1.00592	-0.644275
YOR388C	0.02501	-0.27058	-0.04255	0.06511	-0.44215	0.24775	-0.12557	0.092535	-0.386105	0.348855	-0.04676	0.321355	-0.033695	-0.116025	-0.117695	-0.015925	-0.27004	0.11256	0.62489	0.92546	0.58472	0.825085	-1.01308	0.293325	0.03714	0.560335	0.00664	0.615405	-0.892225	0.428125	0.757355	0.688245	1.04261	1.35479	0.88529	1.22542	0.63898	0.768535	0.59871	0.866425	0.550525	0.5132	-0.48659	-0.34638	0.44707	0.518735	0.3723	0.60108	-0.720825
YLR002C	-3.2543	-2.70753	-2.69872	-2.71777	-2.82693	-2.80737	-2.80724	-2.77025	-2.44652	-3.21252	-3.01707	-2.31576	-2.32577	-2.50502	-2.50192	-2.09578	-2.64112	-2.6569	-2.28431	-2.64713	-2.65089	-2.35194	-2.6944	-2.27631	-2.68321	-2.29027	-2.73074	-2.90245	-2.77705	-2.14685	-2.56122	-2.20782	-2.46881	-2.20045	-2.6	-2.52583	-2.28017	-2.51598	-2.58698	-2.70961	-2.70018	-2.43366	-2.77444	-1.9373	-2.86605	-2.81589	-2.59204	-2.86764	-2.78539
YPR091C	0.93433	0.92316	1.02896	0.93335	0.93626	1.14258	1.40893	1.40736	1.48937	1.54007	1.48735	1.47646	0.886425	0.922375	1.13189	0.757735	1.26073	0.98266	1.00981	0.94903	1.1292	1.20186	1.21428	0.749965	1.10717	0.937745	0.96578	0.786535	0.889425	0.919015	1.34779	1.09567	0.89092	0.56984	0.92364	0.87241	0.95392	1.00957	1.09497	0.935545	0.920435	1.08691	0.63648	0.91735	1.01825	0.862275	1.0626	1.20018	1.07922
YOL083W	2.11275	2.15445	1.77635	1.80827	2.36691	2.14528	2.67076	2.7436	2.363	3.49695	2.67576	3.23543	2.06977	2.30888	2.29367	2.60817	2.0727	1.89724	2.33663	1.88028	2.70967	2.58526	2.13113	2.66925	1.72888	1.6827	2.37084	2.14497	2.24398	1.76103	2.89492	3.21383	2.16514	2.60906	1.4099	1.82816	1.4314	1.37539	1.76117	2.71183	2.12696	1.85365	1.31729	2.04554	2.20864	2.2471	2.26037	2.29424	2.26512
YDR366C	0.97162	0.41898	0.60117	0.66244	0.88346	0.62663	0.31282	0.954455	1.13604	0.696415	0.46635	0.149885	0.478625	1.56371	1.02171	1.58248	1.00342	0.1997	1.95511	0.47874	1.16471	0.615485	0.92879	1.25021	0.2785	1.06527	2.4961	1.29205	1.37071	0.681495	0.470615	1.30262	2.98034	-0.05221	1.09668	0.69838	1.86633	1.13023	0.66092	0.786085	0.582135	0.98516	1.37975	1.16579	0.66609	0.713345	0.44116	0.5816	1.33922
YLR307C-A	1.51572	0.99561	0.46656	0.62337	0.49852	0.23541	-0.34331	-0.295075	0.431545	-0.361035	-0.49738	0.151285	-0.141265	0.276765	0.290665	-0.236505	-0.48594	0.06507	0.24464	0.68444	-0.23294	0.646795	0.3026	0.751705	0.90384	0.695845	0.18184	-0.285805	1.12491	0.024035	0.898945	0.391525	-0.44038	-1.99442	0.85607	1.0318	0.34965	0.893075	0.51114	1.55604	0.136945	0.09978	0.91187	-0.59304	0.64036	0.378065	0.84583	0.35018	0.611465
Q0065	0.02924	0.27493	0.02794	0.66315	-1.4159	0.66704	-0.1251	-0.288995	0.359225	-0.201725	-0.5134	-0.099725	-0.399995	0.658665	-1.78784	0.907535	-0.86154	1.03951	-0.37292	0.41738	-0.33313	0.100925	-0.99163	0.024845	-0.39634	0.473525	-0.90472	-0.596795	0.413535	-0.143515	-0.352805	0.172525	-0.37008	1.1349	-0.58931	0.14741	-0.18399	0.892775	-0.23236	0.021255	0.252205	-0.45895	-0.57895	1.11151	-0.61158	0.472555	-0.24538	0.14048	0.151925
YER190C-A	-0.31968	-0.78102	-0.26832	-0.43689	0.45538	-0.30286	0.30758	-0.198055	0.671845	-0.723095	0.14352	-0.232055	-0.639145	0.269535	-0.264515	-0.262735	0.42227	-0.20912	-0.3698	-0.51705	-0.32797	-0.395115	0.33541	0.032035	0.06945	-0.728255	0.41831	-1.12752	-0.640485	-0.560045	-0.850055	-0.522245	0.33857	0.07413	0.29377	0.13598	0.3652	-0.110355	0.78821	-0.667285	-0.304335	-0.26734	-0.04235	-0.58682	0.0533	-0.491965	-0.01617	-0.09925	0.290575
YDR545C-A	-0.63661	-0.75598	-0.23369	-0.59754	0.20266	-1.01661	0.30955	-0.100575	0.799015	0.182915	0.32005	0.098035	-0.648175	-0.108255	-0.567815	-0.673815	-0.12449	-0.18376	-0.51968	-0.81476	-0.48247	-0.370765	0.18322	-0.141665	0.84124	-0.423715	-0.02466	-0.853595	-0.969105	-0.889375	-1.13176	-0.604855	0.45018	0.53785	-0.18308	-0.31164	0.68803	0.168625	0.46832	0.432125	-0.804335	0.18283	0.31367	-0.48727	-0.2045	-1.13396	-0.41203	-0.07627	-0.177325
YNL020C	0.64577	0.27256	0.50762	0.77792	0.6387	0.611	0.78754	0.690335	0.460525	0.936415	0.72359	0.725645	0.512805	0.664325	0.507875	0.236245	0.63346	0.67785	0.4274	0.47425	0.11391	0.405595	0.41891	0.162065	0.42877	0.213705	0.49718	0.277355	0.293785	0.905975	-0.075535	0.281925	0.17249	0.60933	0.32602	0.19196	0.3406	0.347205	0.45128	0.337505	0.103645	0.64074	0.72606	0.31328	0.44948	1.08152	0.18003	0.75065	0.371335
YGL125W	-0.05294	0.2035	0.07279	0.08987	0.29516	0.13662	0.74818	1.13024	0.684695	0.964235	0.79765	0.660985	1.5716	1.61567	1.40796	1.83865	2.21893	1.78202	-0.68255	-1.11058	0.50322	0.273905	1.67139	1.7853	0.75165	0.782705	0.8607	-0.281235	-0.472105	0.321595	-0.930915	-0.756505	-0.38137	-0.02362	-0.77919	-0.63818	0.6402	0.480985	1.3134	0.610955	-0.128965	1.05899	1.27808	1.39999	-0.47232	0.994575	1.07239	0.8908	1.52178
YKR038C	-0.58783	-0.76741	-0.53213	-0.78618	-0.6267	-0.70305	-0.60184	-0.935575	-0.755485	-0.952745	-0.5145	-0.777525	-0.597715	-0.661035	-0.713095	-0.656505	-0.62654	-0.77021	-0.23089	-0.50783	-0.9824	-0.838865	-0.68439	-0.767765	-1.03298	-0.660525	-1.1051	-0.584665	-0.613515	-0.859745	-1.15532	-0.805835	-0.61077	-0.60619	-0.36316	-0.64293	-0.68513	-0.795045	-0.69352	-0.958245	-0.846895	-0.84329	-1.03138	-0.74804	-0.89489	-0.940155	-0.71465	-0.88657	-0.994085
YDL215C	1.85519	2.04418	1.81685	2.03979	1.94181	2.05277	2.44587	2.99551	2.51109	2.08401	2.09822	2.48698	1.48782	2.08223	1.95894	1.65315	2.00053	2.19949	1.60894	1.97901	1.49822	1.56147	1.44861	1.91555	1.42796	1.4203	2.11389	1.48384	1.67931	1.75321	1.46664	1.87376	1.71912	1.74884	1.859	2.02411	2.40246	2.55613	1.68131	1.67761	2.12928	1.9573	1.79015	1.43547	2.43933	1.88845	2.18712	2.31395	2.4631
YCR022C	0.73782	0.41188	0.46128	0.44649	0.3267	0.57747	-0.26361	-0.287705	-0.054095	-0.002345	-0.28655	-0.144095	0.464185	0.723565	0.245985	1.37082	0.99287	0.43398	-0.2027	-0.0698	0.20035	0.516895	0.53753	0.131905	0.3509	0.169035	0.36255	-0.012535	0.857875	0.150385	-0.137245	1.6318	0.6609	0.16529	0.5632	0.49553	0.35716	0.001785	0.36748	0.528245	0.178645	0.2515	0.58112	0.44627	0.00199	0.459475	0.18862	-0.18622	0.485175
YLR354C	-0.14695	-0.26051	-0.29816	0.03966	-0.01719	-0.06783	0.48814	0.576585	0.118975	0.554205	0.40082	0.579815	0.679035	0.691435	0.707085	0.411425	0.62798	0.58783	0.25334	0.58141	-0.11303	-0.081695	0.18316	0.242365	-0.23899	-0.261415	-0.3472	-0.930265	0.355525	0.242165	0.265835	-0.188975	0.11636	-0.12397	0.06182	-0.24852	-0.02709	-0.123505	0.31879	0.273285	-0.316065	-0.0131	-0.0509	-0.40311	-0.17752	0.012715	-0.13873	-0.10527	0.151605
YFR008W	1.10932	1.11971	0.96695	1.07759	0.85104	1.05058	1.16625	1.56777	1.06224	1.72832	1.50646	1.55808	1.45978	1.75056	1.26446	1.16853	1.39637	1.05616	1.17244	1.43502	1.19774	0.776205	0.41502	1.11519	0.44506	1.02736	0.68616	0.911375	1.23168	0.873855	2.33636	1.32154	1.15257	1.06128	1.22065	1.23138	0.8287	0.594505	0.42762	1.12017	0.812545	-0.09186	0.84423	1.1491	1.0819	0.828875	0.83842	1.02213	0.968205
YDR284C	1.01381	0.95621	1.12098	1.23869	1.13466	1.01306	1.1966	1.82095	1.62722	1.02239	1.1506	1.32012	0.516515	0.812255	0.859825	0.577485	0.83584	0.93513	0.73971	0.87927	0.48159	0.904275	0.73274	0.669825	1.07199	0.764125	1.29609	0.898785	1.14104	1.20415	0.327735	0.934765	1.05756	0.46663	1.25644	0.79197	0.88447	1.14156	0.91411	0.644825	0.952075	1.09921	1.18838	0.96029	0.66565	0.903295	1.21041	0.88335	1.08864
YFL013C	0.1238	0.0893	-0.23105	-0.0922	-0.26212	0.05122	-0.16263	-0.134525	0.379795	0.219525	0.26383	-0.052745	0.269315	0.198255	0.148815	0.034955	-0.01976	-0.23263	-0.41229	0.31447	0.21613	-0.044945	-0.11186	-0.108715	-0.10467	0.034745	-0.31029	-0.268385	0.020965	0.098815	0.685695	-0.145235	-0.04381	-0.10429	0.31608	0.1938	-0.5544	0.037035	-0.20065	0.273745	-0.298455	-0.56362	0.1185	-0.28541	-0.21683	0.179225	-0.56025	-0.7315	0.006335
YKL051W	-0.04601	0.1527	-0.08912	-0.27967	0.22771	0.00874	1.36201	1.47005	1.43432	1.22903	1.386	1.38468	-0.580275	-0.653045	-0.490665	-0.228755	-0.22649	-0.2494	-0.37743	-0.85187	0.75848	1.31483	0.5574	-0.101735	1.852	1.56974	2.12	1.75682	0.662115	0.309105	0.660745	0.554605	0.15646	-0.04882	-0.10145	-0.23412	0.48534	0.148875	0.1126	-0.910635	0.519905	1.17216	0.23545	0.50409	0.31496	0.152705	0.51967	1.58157	0.327465
YPR174C	0.61499	0.72619	0.41801	0.67838	0.41132	-0.08479	-0.84929	-1.00093	-0.659075	-1.06401	-0.80922	-0.844915	-0.070895	0.012575	-0.353285	-0.561105	-0.56067	-0.2755	0.01546	0.38606	-0.91726	-1.01042	0.218	-0.775995	-0.7145	-0.282175	-0.66274	0.050835	0.826335	0.363265	-0.512905	-0.789655	-0.17488	0.0221	0.57268	-0.43487	-0.71958	-0.536175	-0.07592	-0.734705	-0.210865	-0.11533	0.19613	0.1258	-0.43995	0.181275	-0.78912	-0.69888	-0.178405
YJL143W	-0.26803	-0.24909	-0.29597	-0.16344	0.07948	-0.39811	-0.50288	-0.444275	-0.397295	-0.949345	-0.30505	-0.649305	-0.453925	-0.616245	-0.460555	-0.429605	-0.33682	-0.57399	-0.56232	-0.99922	-0.70542	-0.686905	-0.24521	-0.390055	0.31707	-0.472835	-0.12587	-0.526505	-0.596085	-0.267315	-1.07736	-0.817205	-0.38075	-0.46435	-0.07227	-0.5798	-0.17287	-0.524395	-0.18364	-0.505745	-0.257215	0.06262	-0.32519	-0.57551	-0.69869	-0.606605	-0.03339	-0.55236	-0.527875
YDR112W	-0.06437	0.69452	0.13628	0.79884	0.63905	-0.06276	-0.61027	0.297695	1.07054	-0.319375	0.23637	-0.255745	-0.216525	-0.248025	-0.008995	-0.515515	0.17863	-0.37708	0.96404	0.19625	0.78686	-0.159305	1.13849	0.102225	0.96942	-0.462655	0.77192	0.860325	0.861365	0.420635	0.891635	0.387805	0.5095	1.40404	1.14675	0.0181	1.08121	0.287235	0.20336	-0.658345	0.455965	0.21877	0.10005	-0.89357	0.46332	0.172915	0.17236	-0.06467	0.364145
YMR091C	-0.50968	-0.63524	-0.77196	-0.77384	-0.90971	-0.65906	-0.50098	-0.309645	-0.323105	-0.509375	-0.47597	-0.522125	-0.174575	-0.574595	-0.194215	-0.493035	-0.3721	-0.61666	-1.11556	-0.86167	-0.29504	-0.780605	-0.57663	-0.612495	-1.14207	-0.621775	-0.8048	-0.551815	-0.423645	-0.592485	-0.198385	-0.895385	-0.47629	-0.87165	-0.76168	-0.59096	-0.94004	-0.448355	-0.60527	-0.266475	-0.632475	-1.4168	-0.71627	-0.48518	-0.6639	-0.827835	-0.7922	-1.2211	-0.792645
YGR057C	-1.0836	-0.47868	-1.19655	-0.76584	-1.42286	-0.51495	-0.70081	-0.423915	-0.711845	-0.730745	-0.75128	-0.591115	-0.962565	-0.569515	-1.09859	-0.989475	-1.15547	-0.94802	-0.90698	-0.73471	-1.10759	-0.572555	-1.50967	-0.690215	-1.32206	-0.964925	-1.35304	-0.445235	-1.00856	-0.429805	-0.405175	-0.590985	-0.82842	-0.49032	-1.01421	-0.63735	-0.78782	-0.195985	-1.41193	-0.800355	-0.867315	-1.18507	-0.77366	-1.25692	-1.13977	-0.936815	-1.34469	-0.63896	-1.18307
YKL194C	0.45248	0.52768	0.38925	0.56568	0.63882	0.5216	0.65517	0.972555	0.658445	0.419695	0.6266	0.677455	0.425805	0.569605	0.497025	0.700155	0.91889	0.62389	0.1653	0.02649	0.37327	0.668685	0.41305	0.484625	0.74701	0.533395	0.36395	0.217325	0.361635	0.151775	-0.225525	0.466805	0.5805	0.90619	0.30336	0.46175	0.46276	0.662215	0.38565	0.510655	0.573645	0.64127	0.3254	0.50537	0.33345	0.259245	0.43437	0.73034	0.107235
YLR308W	0.19939	0.00237	-0.05677	-0.19737	-0.3866	-0.01459	-0.23931	-0.191755	-0.194185	-0.265645	-0.14208	-0.099615	-0.447035	-0.042785	0.037795	-0.175455	-0.41579	0.04505	0.41023	0.57845	-0.3444	0.529765	0.11731	0.419545	0.27554	0.461845	0.41651	0.613935	0.291845	0.412575	0.189645	0.360925	0.52019	0.56297	0.1707	-0.27393	0.17828	0.470885	0.68963	0.462775	0.429925	1.02803	0.54172	0.42307	0.5102	0.695335	0.56876	0.55563	0.562875
YBR065C	-0.36213	-0.5173	-0.41591	-0.39631	-0.13797	-0.3491	-0.99826	-0.859645	-0.721635	-0.852255	-0.99472	-0.732675	-0.957895	-0.902775	-0.814635	-0.525505	-1.25009	-0.9301	-0.43965	-0.39582	-0.41556	-0.263385	-0.49882	-0.814545	-0.82834	-0.497195	-0.86333	-0.413045	-0.434195	-0.544855	-0.103895	-0.504835	-0.73837	-0.65713	-0.66134	-0.42512	-0.87686	-0.734245	-0.77657	-0.999825	-0.666025	-0.99809	-0.78969	-0.44293	-0.54487	-0.719325	-0.72194	-0.56922	-0.935795
YMR029C	0.73466	0.80428	0.92073	0.79284	0.68622	0.76151	0.46636	0.552955	0.801675	0.812695	0.90627	0.645505	0.635685	0.856835	0.723375	0.462735	0.76826	0.43336	0.63755	1.06871	0.85658	0.574655	0.44196	0.659025	0.30729	0.900215	0.19935	0.812295	0.964355	0.635875	1.19636	0.503075	0.5532	0.79113	0.66378	0.62934	0.40014	0.770135	0.39178	0.873965	0.691275	-0.01381	0.46067	0.33602	0.85265	0.644765	0.47796	0.67258	0.588915
YHL042W	-0.14548	0.79131	0.08791	0.41905	0.14317	0.04609	0.13568	0.169295	0.294875	0.085395	0.08888	0.260445	-0.634765	-0.088605	0.030795	0.257125	0.27816	0.4467	0.97317	0.64954	-0.0538	0.103465	0.39136	0.768435	0.79201	0.364935	0.80934	1.01049	0.651305	0.684465	0.477265	1.61091	0.84377	-0.35278	0.48739	0.9891	0.18829	-0.407785	0.30086	0.477055	0.150205	0.90452	0.13218	-0.09862	0.00216	0.433405	0.8634	0.21616	0.752945
YLR156C-A	0.18529	-1.51148	-0.14112	-0.58714	0.64869	0.48826	0.42392	-0.265425	0.403575	-0.652715	-0.02079	-0.260895	0.387065	-0.179985	-0.289505	0.100685	0.3205	-0.12403	1.023	0.15207	1.10656	0.408975	0.57778	-0.940815	0.42177	0.520185	1.15745	0.636115	1.88773	0.739925	1.15301	-0.036465	1.07666	1.03196	2.14737	-0.05191	1.5561	0.388375	1.16451	-0.542905	0.891485	0.81965	1.21076	0.9698	0.84853	-0.455255	1.15315	0.25136	1.17898
YNL068C	-1.00561	-0.69885	-1.17036	-1.19185	-0.81936	-0.72922	-1.06791	-1.24952	-0.912285	-0.837755	-1.16216	-0.915745	-0.584325	-0.692775	-0.731795	-0.525235	-0.8121	-0.76954	-0.39173	-0.55379	-0.37974	-0.609395	-0.75872	-0.137645	-0.88685	-0.695685	-0.9888	-1.38502	-0.958975	-1.26185	-0.830245	-0.864145	-0.79179	-0.49727	-1.07732	-0.79233	-0.90911	-0.593395	-0.7482	-0.446605	-1.14976	-1.07568	-1.17751	-0.79674	-0.74617	-1.06363	-1.01886	-1.12361	-1.02157
YPR121W	0.60942	0.75006	0.79138	0.46173	0.80177	0.95847	0.41383	0.336925	0.193935	0.792955	0.44263	0.572965	0.504615	0.952285	0.308035	0.185425	0.25527	0.76834	0.79703	0.40015	0.33069	0.597235	0.50326	0.439465	0.66583	0.420415	0.95134	1.12853	0.408225	0.710195	0.341755	0.949505	0.07583	0.19275	0.88814	0.95562	0.32232	0.054205	0.67701	0.563195	0.651465	0.62881	0.46132	0.3598	0.64435	0.607465	0.71215	1.04981	0.608205
YGL178W	0.58004	0.7212	0.51049	0.57203	0.22066	0.4723	0.77531	0.517835	0.616815	0.650265	0.57051	0.802775	0.172215	0.106845	0.264315	0.570715	0.43808	0.37012	0.12757	-0.04553	0.16177	0.145545	0.12392	-0.068335	0.56996	0.331315	0.4485	-0.058045	0.512155	0.601875	-0.253265	0.213805	0.3523	0.30777	0.35224	0.21396	0.21212	0.088985	0.09175	-0.141885	0.532675	0.91114	0.43957	0.95335	0.19531	0.884055	0.51244	0.69847	1.09308
YGL157W	0.48261	0.04695	0.21994	0.08212	0.29236	0.14482	0.84105	0.550365	0.432715	0.689485	0.7178	0.698755	0.268015	0.314555	0.392305	0.371255	0.33311	0.64125	-0.08077	-0.33678	-0.0314	0.006445	-0.19433	-0.177645	-0.28678	-0.300255	0.12805	0.061725	0.022175	-0.024465	0.143265	0.334635	-0.07945	0.03454	-0.06589	-0.11558	-0.07696	-0.225365	-0.06044	-0.326265	0.237135	-0.06668	0.84382	0.05432	0.09144	-0.075115	0.06966	-0.08748	0.002465
YMR148W	1.09631	1.17699	1.03372	0.93853	1.72635	1.09147	1.25301	0.893905	1.16698	1.25718	1.47604	1.17118	0.847985	0.597585	0.788475	1.00852	1.00637	1.19902	0.92278	0.36873	1.13866	1.27221	1.40581	0.832395	1.63998	1.02201	1.38165	1.05255	0.565135	1.14786	1.01409	0.932795	0.93143	0.49278	0.73629	0.69058	1.36146	0.836985	1.2233	0.649565	1.21626	1.54384	1.1658	1.00763	0.96222	1.12986	1.5282	1.33454	1.23507
YML058W	-0.4764	-0.41551	-0.38422	-0.33576	-0.27129	-0.66897	-0.28875	-0.751705	0.033435	-0.416385	-0.08452	-0.434855	-0.058565	-0.644805	-0.225015	-0.347975	-0.19302	-0.34835	-0.49051	-0.80715	-0.66465	-0.466535	-0.37275	-0.909295	-0.06525	-0.356175	0.00247	-0.458745	-0.313165	-0.283395	-0.940115	-0.950065	-0.48755	-0.8046	-0.48998	-0.76186	-0.41073	-0.751375	-0.20625	-0.685465	-0.867235	0.4827	-0.4285	-0.16795	-0.85428	-0.663735	-0.4308	-0.68229	-0.501075
YGR019W	1.9653	2.10583	2.24542	2.00832	2.47024	2.33057	3.03778	3.09362	2.81315	2.86788	2.86267	2.89864	2.57205	2.71191	2.78519	2.60575	2.84888	3.23727	2.75297	2.90144	3.01318	2.60968	2.34173	2.69772	2.15786	2.03579	2.69234	1.70002	2.70229	1.95118	1.98513	2.59516	2.6358	1.86287	2.62465	2.5813	2.17344	2.19337	2.35954	2.52902	2.66655	2.52266	2.33789	2.12847	2.78915	2.40804	2.79105	2.42251	2.81236
YLR249W	-3.30604	-3.15161	-3.32997	-2.83286	-3.22952	-3.49223	-1.5868	-1.9815	-1.88193	-2.01912	-1.91907	-1.46033	-1.33736	-0.976165	-1.22062	-0.748805	-0.8491	-0.99347	-2.25846	-2.4809	-3.29914	-2.1774	-2.25658	-1.45121	-1.69989	-2.18895	-2.44072	-2.93281	-2.48915	-2.65185	-2.16199	-1.61546	-2.4228	-2.11626	-2.36784	-2.21613	-2.22679	-2.25622	-2.52839	-1.4845	-2.19734	-2.05571	-2.51085	-2.11989	-3.4598	-2.95463	-2.21814	-2.82031	-2.80104
YBR263W	-1.89674	-2.01502	-1.70693	-1.67413	-1.45057	-1.99665	-1.25216	-1.30185	-1.53832	-1.6156	-1.49265	-1.4101	-1.03134	-0.933175	-0.817305	-0.685835	-0.86908	-0.81808	-1.36566	-1.69557	-1.84324	-1.46852	-1.27619	-1.1889	-1.43277	-1.67959	-1.61238	-2.05898	-1.74205	-1.54136	-1.96934	-1.74642	-1.79354	-1.58119	-1.76205	-1.81115	-1.31654	-1.85503	-1.2856	-1.31791	-1.52452	-1.6159	-1.48659	-1.81742	-2.14264	-1.96839	-1.63465	-2.212	-2.0564
YJL049W	0.0651	0.50145	0.19945	0.29285	-0.27391	0.4501	-0.08151	-0.202115	0.074095	0.615335	0.34852	0.116265	-0.154015	0.079825	-0.111005	-0.089105	-0.78391	-0.50218	-0.39868	0.04304	0.43028	0.000385	0.03812	-0.031915	-0.18545	0.526565	-0.20451	0.706515	0.228225	0.090195	1.74755	0.419245	-0.10854	0.22871	-0.14373	0.23769	-0.66513	-0.338345	-0.20828	0.392085	0.105555	-0.37772	0.0425	0.24454	-0.0197	0.212495	-0.56965	-0.467	-0.212945
YOR249C	0.35339	0.35709	0.27554	0.4479	0.22357	0.5087	-0.11473	0.284715	0.048195	0.288915	-0.02939	0.216935	-0.287215	0.107115	-0.170605	0.066435	-0.23238	-0.12673	0.35615	0.51331	0.02445	0.315195	-0.26856	0.027865	-0.21678	0.504345	-0.3237	0.560835	0.245645	-0.008215	0.488395	0.391105	-0.34341	0.00626	-0.05065	0.30513	0.12735	0.403915	-0.07848	-0.010875	0.156545	-0.1852	0.0002	0.23735	0.26192	0.185185	-0.20209	0.42829	0.091305
YBL097W	-0.8898	-0.54275	-0.69271	-0.88733	-0.88648	-0.58673	-0.96627	-0.879445	-0.536275	-0.549685	-0.77104	-0.865355	-0.045155	-0.094805	-0.134365	-0.195955	-0.33247	-0.45766	-0.9546	-0.81178	-0.50195	-0.568625	-0.76309	-0.248395	-1.23845	-0.748075	-0.81823	-1.15701	-1.07899	-0.844485	-0.460285	-0.893615	-0.50719	-0.2742	-0.94939	-0.49309	-0.91833	-0.736775	-0.03061	-0.080755	-0.863135	-0.79789	-0.9654	-0.37468	-1.13698	-0.472305	-1.42103	-1.22624	-0.822685
YCR020W-B	-0.31573	-0.63085	-0.3272	-0.1732	-0.74201	-0.33377	-0.11196	-0.310265	0.140025	-0.020565	0.57784	-0.201035	-0.460435	-0.927625	-0.717965	-0.482635	-0.83252	-0.94394	0.22328	1.00824	-0.39101	-1.37664	-0.06772	0.650485	0.09304	1.06479	-0.19537	1.2088	0.538555	0.307835	1.253	-0.767725	-0.44224	-0.11049	-0.09281	-0.23819	0.23733	0.907335	-1.19461	-0.219935	-0.879365	-1.23416	0.36505	0.20675	-0.08656	0.190825	0.18062	0.57201	-0.496835
YDR286C	0.75581	0.07128	0.30443	0.36279	0.45106	0.38831	0.62741	0.239805	0.474735	0.573675	0.62666	0.506925	-0.018335	-0.520655	-0.179755	-0.557535	-0.72361	-0.46423	0.93069	0.74053	0.28308	0.689425	0.64094	0.481765	0.76499	0.163805	0.08967	0.875925	0.438905	0.504955	1.19212	0.398235	0.15902	1.74649	0.66301	0.46516	0.64637	-0.065745	0.2479	0.477865	0.647375	0.59483	0.47176	0.8207	0.71472	0.483865	0.25676	0.50392	0.356675
YPR044C	0.16171	-0.46295	-0.83228	-0.61773	-0.27744	0.06992	0.05996	-0.204535	-0.120825	-0.491875	-0.11383	-0.588515	-0.737515	0.055215	0.121405	-0.180125	0.48911	-0.3847	-0.38034	0.26162	-0.47703	0.149695	0.53568	-0.247265	0.41563	-0.400545	-0.35616	-0.148525	0.985655	0.534845	0.341265	-0.353205	0.16633	0.47382	1.22871	0.01198	1.14227	0.189435	0.25444	-0.329555	-0.047695	0.23403	0.78552	0.4285	0.86546	-0.137725	0.97662	0.23642	0.713375
YDR170W-A	0.44343	0.45948	0.44443	0.30309	0.28753	0.18825	0.73756	0.776385	0.647175	0.564705	0.26625	0.591895	2.05323	1.74299	1.57746	1.72262	1.09975	1.79302	0.50797	0.28684	0.43177	0.383705	0.26181	0.317455	0.08867	0.418695	0.22704	0.039355	0.432725	0.394325	0.394065	0.382895	0.50776	0.22232	0.65544	0.67476	0.42669	0.583255	0.49159	0.171455	0.168555	0.27359	0.3459	0.83593	0.6085	0.502345	0.48002	0.26274	1.0914
YBL043W	-0.2967	-0.53467	-0.48376	-0.23133	-0.42322	0.01877	0.66716	0.348345	-0.231495	0.751145	0.97146	0.064085	1.26462	1.61905	1.11532	2.16805	1.02339	1.58842	0.71804	0.58124	0.18568	0.199855	0.12172	2.24017	-0.31047	0.019905	-0.70625	-0.845595	-1.40145	-0.304095	0.529175	1.43769	0.95248	1.1881	0.65575	1.55152	-0.31712	-0.882245	0.77012	2.49021	-0.054965	0.96947	0.11361	-0.80493	0.42272	-0.170185	-0.42437	0.14853	-1.18973
YLR018C	-0.34117	-0.16063	-0.4274	-0.37626	-0.38039	-0.32681	-0.15825	-0.147365	-0.058395	-0.205925	-0.3582	-0.179605	-0.009795	0.112905	0.013755	-0.023765	0.14405	-0.05998	-0.29363	-1.11167	-0.25832	-0.452485	-0.12593	-0.298115	-0.27452	-0.480055	-0.3754	-0.131415	-0.914195	-0.503495	0.101635	-0.286125	-0.37541	-0.3567	-0.75854	-0.54977	-0.00836	-0.377785	-0.35597	-0.811715	-0.464555	-0.53827	-0.26177	-0.52842	-0.17316	-0.464575	-0.25001	-0.37412	-0.225645
YMR076C	-1.61939	-1.37786	-1.6636	-1.26244	-1.84214	-1.5846	-1.75518	-1.72098	-1.75303	-1.48436	-2.07561	-1.27195	-1.12858	-0.932745	-1.20915	-1.06542	-1.15123	-1.28762	-1.23559	-1.33857	-1.65757	-1.18505	-1.80596	-1.01731	-2.15082	-1.51113	-1.62817	-1.78991	-1.42237	-1.35421	-1.66085	-1.46158	-1.59637	-1.41728	-1.77637	-1.36209	-1.49891	-1.2529	-1.43041	-1.50306	-1.62583	-1.66692	-1.54259	-1.23047	-1.53383	-1.51614	-2.30051	-2.16113	-1.61705
YOR251C	-0.65572	-0.4652	-0.46953	-0.43188	-0.31207	-0.56046	-0.23495	-0.207955	-0.418225	-0.316545	-0.28654	-0.267795	-0.441165	-0.355405	-0.331295	-0.218705	-0.49611	-0.21886	-0.51404	-0.88082	-0.45401	-0.187815	-0.31369	-0.462395	-0.00021	-0.547445	-0.27131	-0.348605	-0.875715	-0.456565	-0.932475	-0.362585	-0.43264	-0.58523	-0.77598	-0.8973	-0.13299	-0.339525	-0.33266	-0.465225	-0.041985	-0.04196	-0.54546	-0.40157	-0.38182	-0.683855	-0.48733	-0.50701	-0.422605
YAR070C	-0.20155	-0.04769	0.09442	-0.22271	0.03177	-0.56176	0.39944	0.465155	0.304555	0.424915	0.31144	0.015735	0.466315	0.360775	0.773555	-0.024245	0.68287	-0.4249	-0.0973	-0.5722	-0.60468	-0.768805	1.08557	-0.047085	0.52992	0.364005	0.17198	-0.969265	-0.104045	0.281485	-0.257645	0.040415	0.67876	-0.31211	-0.61857	-1.0882	0.51991	0.721655	-0.0375	-0.221165	1.26523	0.57606	1.04369	0.38661	0.24492	0.031105	1.14824	0.88139	0.814655
YBR124W	-0.19752	-0.43566	-0.13425	-0.3283	0.21285	-0.16722	0.45616	-0.073055	-0.059805	0.376955	-0.21919	0.377445	0.250415	0.180055	0.379215	-0.572805	0.33507	0.9253	-0.22736	0.35326	0.46174	0.823465	0.94319	0.495585	0.31058	0.329335	0.20509	0.597785	0.019855	0.728305	0.107185	0.459895	-0.22127	-0.12236	0.23755	0.16284	0.56047	0.709105	0.29509	0.341735	0.586225	0.93576	0.32568	-0.46815	0.70589	0.263745	0.76982	0.58804	0.045265
YJR135W-A	-0.55567	-0.31088	-0.41649	-0.41079	0.16988	-0.6229	-0.22722	-0.885135	-0.159215	-0.318675	-0.06045	-0.421355	-0.678905	-0.611015	-0.494835	-0.195985	-0.53532	-0.26159	-0.4417	-1.0363	-0.67538	-0.412845	-0.39062	-0.535585	0.23352	-0.434215	-0.10328	-0.602525	-0.715095	-0.326175	-0.252665	-0.345485	-0.45022	-0.41293	-0.35931	-0.74719	-0.41266	-1.00449	-0.39598	-0.374565	-0.175095	-0.04965	-0.38755	-0.88594	-0.49765	-0.320445	-0.08572	-0.44707	-0.564575
YOR186W	1.54908	2.19517	1.4423	1.77375	2.07812	1.4602	2.71166	2.31139	2.69021	3.44243	2.50992	3.46291	2.16102	3.17863	2.47538	3.94889	2.38868	2.47416	1.87676	1.48348	2.2784	2.49021	3.21065	1.31854	3.1717	3.31548	3.21097	3.41807	1.65054	1.08139	3.22376	2.57301	2.92137	1.86991	2.94571	1.76662	2.38735	2.36192	1.9714	1.54266	2.85587	2.51645	2.84108	4.12988	1.83179	1.49143	2.21824	3.05005	2.29264
YDR083W	-3.59158	-3.22424	-3.3804	-3.33898	-3.54066	-3.66124	-3.58077	-4.08629	-2.99948	-3.38483	-3.53951	-2.93796	-2.94936	-3.49994	-3.23434	-2.48224	-3.41227	-3.54581	-3.38688	-3.37268	-3.00988	-2.95791	-2.47111	-2.86147	-3.17929	-2.63198	-3.21505	-3.35742	-3.50476	-2.70442	-2.30384	-2.698	-3.40276	-2.58093	-3.03274	-2.79194	-2.99116	-3.29379	-2.73495	-3.13315	-3.24632	-2.78061	-3.5201	-2.50854	-3.43167	-3.30394	-3.63379	-4.09147	-3.75445
YOR011W-A	1.10234	0.59227	1.10634	0.35545	0.57947	0.22324	-0.28065	0.186655	-0.350565	-0.240845	0.16006	-0.150705	0.217505	0.637305	-0.677665	-0.804995	0.2202	-0.16526	0.97832	0.59483	-0.38175	0.742645	1.06689	0.583385	0.44176	0.767425	0.50504	0.790155	0.359235	0.330405	0.737075	0.512255	0.98863	-0.29086	0.62129	-0.19901	0.94167	0.443025	0.81568	-0.215235	-0.073655	0.45695	1.30332	0.02461	0.99448	0.335655	0.32337	1.05849	0.869935
YOR267C	1.45423	1.54291	1.60523	1.5964	0.72115	1.41744	0.78518	0.657675	1.13416	1.25958	1.02255	1.01438	0.546935	0.342025	0.507735	0.254125	0.37655	0.39191	0.89625	0.94406	0.64479	0.603485	0.87502	0.322095	0.81388	1.18983	0.98706	0.889555	1.60364	0.917375	1.22162	0.609995	1.14246	0.44113	0.91537	0.81036	0.96321	1.08431	0.87646	0.536575	0.685825	1.24265	1.09251	1.4563	0.83215	1.02195	1.00648	1.25333	1.25292
YLR109W	1.61134	0.22878	1.32985	0.19762	2.08818	0.18605	1.50699	0.530375	0.817405	1.01797	1.62579	0.948225	1.24404	0.863825	1.56767	0.780405	1.1273	0.91863	0.87745	-0.12788	1.05694	0.964765	0.92148	1.73161	0.68112	0.383735	0.28174	0.219205	0.492325	0.665455	0.794335	-0.086265	1.0131	0.54093	0.68424	0.0484	0.58309	0.062415	1.04726	1.91187	0.333335	0.46398	0.75024	0.07082	1.31722	0.017435	0.67044	0.88318	1.11234
YOR032C	0.42518	1.48839	0.72067	0.71545	0.16354	0.93103	0.0914	0.541445	0.153365	0.540625	-0.24893	0.331835	1.62319	1.87989	1.64179	1.52534	1.29922	1.80176	0.94485	0.92513	0.74453	0.514405	0.48797	1.06889	0.74133	0.924925	-0.05012	1.18596	1.73805	1.96053	1.03801	1.35923	1.26143	0.74374	1.02558	1.17634	0.39127	0.555145	0.10743	0.047865	0.417945	-0.23247	1.61559	2.09836	0.75915	1.86054	0.37906	0.4061	0.683255
YOR091W	-2.77029	-2.54482	-2.86999	-2.96823	-3.0522	-2.86716	-3.12513	-3.72767	-2.16224	-3.0172	-2.85852	-3.00667	-1.94959	-2.68994	-2.48708	-2.19196	-2.68954	-2.74707	-2.91584	-3.22217	-2.29569	-2.84917	-1.95887	-2.13937	-2.71811	-2.46349	-2.84113	-3.28021	-2.89298	-2.49126	-1.98466	-2.78686	-2.66557	-2.11259	-2.81225	-2.56614	-2.86087	-2.95613	-2.26348	-2.38232	-2.86352	-2.78065	-2.85848	-2.21915	-3.12018	-2.8849	-3.39383	-4.07091	-2.81076
YKR059W	-2.32804	-2.0416	-2.37907	-1.3839	-2.25414	-1.78392	-0.891	-0.976415	-0.952865	-0.656385	-0.83444	-0.745415	-0.740925	-0.487095	-0.608025	-0.203865	-0.59857	-0.50004	-1.47249	-1.51443	-2.0995	-1.06309	-1.05279	-1.07747	-0.83331	-1.35848	-1.45712	-2.02386	-1.81905	-1.36045	-1.22981	-1.19668	-1.25601	-1.43293	-1.84851	-1.39033	-1.236	-1.2851	-1.45088	-0.998445	-1.33285	-0.84998	-1.03364	-1.14138	-2.29499	-1.80573	-1.12222	-1.48203	-1.76696
YBR205W	-0.50303	-0.65043	-0.73815	-0.51639	-0.6892	-0.37725	-0.1614	0.238045	-0.269425	-0.302415	-0.24801	-0.049095	-0.282495	-0.257125	-0.188355	-0.151665	-0.06987	0.11139	-0.46329	-0.48498	-0.72949	-0.611735	-0.43963	-0.289655	-0.29355	-0.509145	-0.36944	-0.238445	-0.757875	-0.436595	-0.325805	-0.350675	-0.50135	-0.24475	-0.67103	-0.49452	-0.71519	-0.562795	-0.40307	-0.463495	-0.346195	-0.55336	-0.40183	-0.2008	-0.40328	-0.590935	-0.45113	-0.47648	-0.732715
YLR316C	-1.14269	-0.71112	-0.94681	-1.20364	-1.04502	-0.84316	-1.44769	-1.45517	-1.08607	-1.46982	-1.14701	-0.960255	-0.636215	-0.900765	-1.19582	-0.997615	-0.84578	-0.78869	-1.51392	-1.42642	-0.89986	-1.24853	-0.99394	-0.690755	-0.87955	-1.07736	-1.07014	-1.27255	-1.42935	-0.646805	-1.0448	-1.39128	-1.27866	-0.8676	-1.12371	-0.98301	-0.87003	-0.964975	-1.02923	-0.742935	-1.15928	-1.1061	-1.31917	-1.33363	-0.93015	-0.798805	-1.3956	-1.49965	-1.12992
YDR406W-A	0.39642	-0.74069	0.39239	0.04285	-0.56078	0.11063	0.466	-0.071035	0.752445	0.499175	1.3521	0.854375	0.448745	-1.19731	-0.077775	0.701325	0.09273	0.76174	0.87079	0.2696	0.47487	0.727275	0.64246	0.631195	1.06541	0.482285	-0.33657	-0.050375	0.222835	0.400705	0.677425	0.391985	0.06358	0.12257	2.06825	-0.49806	0.58268	0.640555	-0.27811	0.043665	0.844475	0.99263	-0.37319	0.91008	0.29709	0.543845	0.50986	0.19193	-0.015185
YLR292C	0.71375	0.39024	0.63796	0.51653	0.65563	0.19358	0.27464	-0.005805	0.310455	0.034865	0.17333	0.365415	0.447035	0.193585	0.529895	0.246155	0.41301	0.25328	0.76153	0.43068	0.14095	-0.211635	-0.0934	-0.082555	-0.62074	-0.183695	0.09711	0.512215	0.394745	0.526515	0.429185	0.216725	0.06208	-0.06145	0.757	0.3623	0.01346	-0.347385	-0.41727	0.035295	-0.016485	-0.72838	0.5018	-0.04201	0.41147	0.348005	0.26181	0.03747	0.467205
YLR216C	2.12121	2.23235	2.09828	2.23276	1.98482	1.9739	1.57611	2.17884	1.70253	1.72042	1.65834	1.82563	1.96003	2.17984	2.08311	1.61885	2.29803	1.87744	1.95029	2.38832	1.65063	1.42529	1.25635	1.32868	1.67397	2.16203	1.51198	1.9467	2.08298	2.66859	2.16506	2.16152	1.89054	1.44513	2.32131	2.09411	1.49656	2.18518	1.7048	1.68165	1.22341	0.92794	2.33198	1.46591	1.89524	2.695	1.74208	1.65991	2.19776
YCR044C	0.18392	0.36522	0.36338	0.61612	-0.1561	0.16889	0.4215	0.852535	0.367645	0.323415	0.33697	0.170545	0.047675	0.300385	0.276145	0.280085	0.17396	0.48826	-0.44048	-0.53604	-0.0468	0.167245	-0.0998	-0.271105	0.60818	-0.075835	0.48296	-0.313865	-0.386295	0.465795	-0.502665	-0.056755	0.30689	0.17596	0.03404	-0.17744	-0.22644	-0.065495	0.51304	0.015195	0.158235	0.72243	0.1231	0.47477	0.22518	0.219185	0.4506	0.1236	0.292665
YDR046C	-0.74038	-0.4871	-0.4345	-0.60794	-0.33105	-0.5416	-0.96362	-0.905935	-0.902975	-1.27144	-0.79448	-1.02395	-0.098015	-0.172255	-0.278775	-0.274865	0.14059	-0.16912	-1.04355	-1.51737	-1.19519	-1.12153	-0.45086	0.479635	-0.36188	-0.841455	-1.01448	-0.929725	-1.35198	-0.177145	-1.422	-0.786325	-0.95766	-1.26547	-0.93454	-0.90516	-0.94845	-1.15434	-0.3695	0.227375	-0.790395	-0.36238	-0.70593	-0.30441	-1.10755	-0.014525	-0.42709	-0.72734	-0.817005
YGR069W	1.66439	0.05941	1.30282	0.64607	1.05048	-0.43598	1.46858	1.27252	1.25189	1.40785	2.29539	2.19564	0.582225	0.676795	-0.038385	-0.086065	1.57103	0.1925	0.1308	1.35911	0.64802	1.27486	0.6978	0.235865	1.66452	0.809285	0.38676	1.9086	1.0032	-0.034115	0.943365	0.927855	0.65422	0.52633	0.8705	0.81095	0.93229	1.49307	0.97091	1.27984	0.927925	1.77394	1.24548	0.72744	0.59833	1.2415	0.46233	1.19005	1.37214
YJL092W	-0.69696	-0.76732	-0.70642	-0.76731	-0.93067	-0.91754	-0.45456	-0.805245	-0.660305	-0.728765	-0.55845	-0.638065	-0.614655	-0.643485	-0.645395	-0.635465	-0.75673	-0.66626	-0.54318	-0.71277	-0.72127	-0.640235	-0.59646	-0.510765	-0.88439	-1.0154	-0.92457	-1.19274	-0.953185	-0.705645	-1.02829	-0.682255	-0.64256	-0.42922	-0.71802	-0.87109	-0.87468	-1.0839	-0.36876	-0.524705	-0.936545	-0.56252	-1.02706	-0.57745	-1.01805	-0.806895	-1.04472	-1.01041	-0.775555
YDR096W	2.18246	1.91218	2.21826	2.18257	2.07228	2.22915	2.23635	2.12179	1.71019	2.23934	1.91817	2.31185	1.39105	1.35359	1.61695	1.57542	1.62033	1.92774	1.7045	1.83636	1.49932	1.41397	1.33323	1.2833	2.30721	2.11318	1.91522	1.05093	1.96012	1.77642	1.39989	1.64129	1.97297	1.58337	1.62791	1.701	2.18232	2.07341	2.03415	1.98355	2.10247	2.10271	2.47765	1.79412	1.84195	2.11706	2.0776	1.87411	1.80547
YML018C	-1.95317	-1.56155	-1.65939	-1.68793	-1.66635	-2.11143	-1.95783	-1.87346	-1.6323	-2.34612	-1.89762	-1.91665	-1.66983	-2.04385	-2.02467	-1.52706	-1.77983	-1.80855	-2.17259	-3.0849	-2.27741	-2.13801	-1.59867	-2.08622	-1.26951	-1.79442	-1.62054	-2.01806	-2.49512	-1.5015	-3.08428	-2.57993	-2.24914	-1.74571	-2.04528	-2.52151	-1.30517	-1.67036	-1.53644	-2.18389	-1.83692	-0.91241	-1.74354	-1.19501	-2.1892	-1.66956	-1.65678	-2.11365	-1.57211
YLR445W	-0.04762	-0.42091	0.1672	-0.05903	-0.59726	-0.07063	0.43531	-0.216945	-0.122395	-0.347075	-0.21327	0.101615	0.112685	0.027605	-0.109075	-0.294695	-0.21696	0.03535	0.31054	0.46949	-0.12158	0.569065	-0.13045	0.731415	0.37489	0.585825	0.12127	0.498805	0.530065	0.667955	0.198315	-0.136315	-0.27989	0.08625	0.2642	0.50975	0.67807	0.392675	-0.06838	0.446875	0.373555	0.37314	0.70257	0.34319	0.59697	0.198225	0.82719	0.14895	0.025915
YOR138C	0.87597	0.75355	0.98979	0.6347	1.13162	0.88905	0.77946	0.975615	0.947015	0.928575	1.09258	0.827705	0.572335	0.439685	0.537575	0.314395	0.55587	0.58523	0.72952	0.92401	0.80272	0.509045	0.241	0.480525	0.62715	0.424775	0.88559	0.587005	0.543715	0.777295	0.258415	0.674975	0.98046	0.98152	0.78014	0.85028	1.01449	0.972205	1.01405	0.810745	0.656285	0.81822	0.58299	0.72929	0.99569	0.983745	0.99723	0.8897	0.611525
YOR369C	-1.75086	-1.54	-1.81677	-1.57399	-1.52521	-2.07322	-0.8983	-1.37691	-0.880205	-0.812685	-0.7695	-0.615245	-0.899085	-0.828565	-0.846745	-0.462075	-0.8704	-0.58097	-1.23705	-1.57664	-1.88165	-1.20632	-1.54493	-1.26658	-0.65646	-1.2976	-1.33411	-1.06102	-1.77433	-1.2108	-0.446355	-0.930685	-1.22648	-1.1196	-1.3008	-1.43974	-0.98162	-1.44849	-1.60402	-1.20667	-0.638095	-0.53506	-0.84851	-0.81717	-1.40192	-1.59844	-0.64953	-0.51279	-1.33693
YGR246C	-0.25629	-0.10684	-0.24713	-0.3203	-0.22767	-0.286	-0.50277	-0.868565	-0.323445	-0.459935	-0.45454	-0.430435	-0.394565	-0.493845	-0.349445	-0.180165	-0.67335	-0.61431	-0.85509	-0.57609	-0.18435	-0.311025	-0.42007	-1.01626	-0.23909	-0.090395	-0.36051	-0.258135	-0.646585	-0.232265	-0.048325	-0.380085	-0.36897	-0.40858	-0.59135	-0.77516	-0.84435	-0.499385	-0.58107	-0.575005	-0.442095	-0.63796	-0.37567	-0.28298	-0.40242	-0.185385	-1.16533	-1.08952	-0.668755
YJR145C	-2.38094	-2.18046	-2.47993	-2.34669	-2.18609	-2.50125	-0.89301	-1.26584	-1.24762	-0.840995	-0.95996	-0.913095	-0.805855	-0.524555	-0.708485	-0.448075	-0.61783	-0.56426	-1.62882	-1.75746	-2.10794	-1.35312	-1.52569	-1.05225	-1.11609	-1.47039	-1.88504	-2.00209	-1.91421	-1.91433	-1.16748	-1.09448	-1.44633	-1.27788	-1.62217	-1.77447	-1.22397	-1.54183	-1.821	-1.02534	-1.36366	-1.59066	-1.31655	-1.32347	-2.16552	-2.01608	-1.33543	-1.5751	-1.80117
YJR138W	-0.17125	-0.06688	-0.27097	-0.29134	-0.11272	-0.135	-0.26024	0.044425	-0.198245	-0.031535	-0.42911	-0.141185	-0.114545	0.175615	-0.070425	-0.011235	-0.27099	0.13261	-0.16451	-0.04877	0.14353	0.109565	-0.26501	0.070705	-0.25833	-0.200515	-0.05924	-0.484255	-0.084305	-0.261295	-0.123215	0.136225	-0.30441	0.03099	-0.25068	-0.12136	-0.06334	0.104275	-0.16955	-0.177605	0.003825	-0.24753	-0.4919	-0.00915	-0.06429	-0.180675	-0.30879	-0.32892	-0.073605
YHR059W	-0.70467	-0.16499	-0.04685	-0.29036	-0.10519	-0.19555	-0.35549	-0.384185	-0.310865	-0.200305	0.01449	-0.458475	-0.153345	-0.549035	-0.063985	-0.262885	-0.58489	-0.24483	-0.20962	-0.47852	-0.03224	-0.199135	-0.31395	0.070855	-0.16714	-0.281335	-0.46626	-0.213435	-0.518695	0.005925	0.404335	-0.408575	-0.41364	0.14786	-0.3358	-0.27888	-0.24228	-0.491325	-0.26304	0.014355	-0.177565	-0.14406	-0.63353	-0.38461	-0.00397	-0.149705	-0.41435	0.11848	-0.348345
YLR138W	-0.59668	-0.20678	-0.25319	-0.46831	-0.65266	-0.47731	-0.48721	-0.502405	0.126435	-0.136725	-0.05847	-0.294335	-0.374805	-0.356835	-0.345835	-0.342545	-0.27102	-0.4596	-0.89856	-0.89675	-0.72967	-0.409895	-0.14303	-0.929435	-0.2125	-0.327115	-0.33542	-0.161565	-0.970935	-0.041975	-0.650825	-0.808505	-0.27294	-0.48492	-0.69738	-0.79484	-0.71447	-0.657005	-0.44991	-1.06147	-0.705545	-0.16132	-0.90901	0.0354	-0.99915	-0.139445	-0.88596	-0.76972	-0.324575
YHL009W-B	-0.49317	0.35442	-0.3565	-0.11495	-0.81875	0.29431	-0.21489	-0.116095	-0.153705	-0.051545	-0.09362	0.142985	-0.336845	0.083565	-0.633425	-0.738515	-0.76263	-0.68447	-0.44419	0.24314	0.37137	0.289685	-0.35542	0.244135	-0.45153	0.291125	-0.48697	0.166195	-0.030435	0.345665	0.536945	0.620995	-0.28347	0.2216	-0.47424	0.37166	-0.61848	-0.010705	-0.50526	0.155025	0.100075	-0.38983	-0.72507	0.09691	-0.39885	0.476115	-0.04649	-0.10354	-0.086435
YNL156C	0.96003	0.84417	0.97546	1.13031	1.12495	0.90872	1.52776	1.75977	1.62079	1.19886	1.50042	1.57553	0.528905	0.776355	0.782195	0.726945	0.65063	0.62804	0.76908	0.88968	0.8851	1.04381	0.73113	1.08438	1.12143	1.03388	1.33621	1.33194	1.39379	1.13445	0.978575	0.980505	1.09431	0.83939	0.91672	0.92378	0.89811	1.07134	1.23716	1.08139	1.27912	1.15904	1.07656	0.88313	1.42696	1.37515	1.06542	1.20891	0.945325
YNL106C	0.77137	0.6678	0.67262	0.59396	0.75085	0.77034	0.71796	1.07784	0.687705	0.718965	0.57306	0.904105	0.696075	1.0255	0.988505	0.930025	0.94259	0.89833	0.40348	0.47287	0.16313	0.222245	0.28981	0.600875	0.25282	0.154745	0.67268	0.218515	0.089325	0.288865	0.235345	0.687035	0.62039	0.47145	0.92199	0.92919	0.62532	0.568645	0.26656	0.491955	0.505235	0.50038	0.66281	0.5825	0.61273	0.489345	0.67773	0.56686	0.731075
YNL286W	-0.28359	-0.11016	-0.36986	-0.06374	-0.89317	-0.43254	-0.40566	-0.578435	-0.008115	-0.326465	-0.18069	-0.459745	-0.363205	-0.303385	-0.440675	-0.368515	-0.71943	-0.62541	-0.78927	-0.2015	-0.15936	-0.155515	-0.02156	-0.333285	-0.4414	-0.104025	-0.37718	-0.071805	-0.405085	-0.093665	1.02602	0.301325	-0.15296	-0.45492	-0.28483	-0.20812	-1.01253	-0.291135	-0.84077	-0.269645	-0.304535	-0.67894	-0.00689	-0.53987	-0.58244	-0.089565	-1.06314	-0.86359	-0.474785
YNL093W	1.83858	2.44674	2.16729	2.26996	2.36949	2.34458	3.6207	3.16106	2.86775	3.79075	3.40609	3.42256	1.53527	1.40827	1.48423	1.75029	1.54252	1.67297	2.81997	2.65962	2.6645	2.81568	2.67228	2.51148	2.36797	2.32314	2.63335	3.05572	2.23327	3.3315	3.36305	3.31151	3.0336	2.83972	2.77106	2.25394	1.87894	2.47282	2.16267	2.47149	2.65042	2.54309	1.90726	2.16984	2.29551	3.40939	1.79384	2.72135	2.6645
YIL040W	-0.06534	-0.20683	0.01582	-0.06325	-0.28353	-0.38362	-0.18273	-0.336355	-0.010505	-0.380515	-0.14546	-0.368745	-0.458855	-0.484305	-0.421535	-0.470535	-0.60023	-0.35593	-0.67037	-1.02284	-0.52569	-0.369475	-0.38083	-0.673965	0.04419	-0.208525	-0.03579	-0.015835	-0.463395	0.131355	-1.00152	-0.741295	-0.35082	-0.47591	-0.58518	-0.76899	-0.49439	-0.890565	-0.1731	-0.526295	-0.390755	-0.26634	-0.01814	0.1223	-0.37127	-0.391785	-0.43003	-0.58136	-0.295225
YKL104C	0.09273	0.0462	-0.11689	0.12302	0.51308	0.1716	-0.13676	0.088765	-0.119085	-0.045185	-0.22222	0.021595	0.250195	0.351245	0.552075	0.476515	0.79393	0.61305	0.18374	0.07871	-0.50508	-0.577455	-0.06808	0.146625	-0.0653	-0.798365	0.13563	-0.482295	-0.150725	0.000165	-0.045705	0.395205	-0.16396	-0.22377	0.33896	0.19884	0.07529	-0.131295	-0.41471	-0.047795	-0.137375	-0.09618	-0.2013	-0.19541	-0.32274	0.144025	0.06435	-0.01914	-0.051575
YLR186W	-2.18628	-2.3306	-2.25229	-2.04998	-1.70703	-1.86675	-2.23001	-2.17597	-2.06418	-2.18499	-2.37194	-1.95304	-1.52155	-1.73876	-1.55723	-1.27774	-1.54426	-1.62521	-1.86959	-2.51394	-2.05425	-2.27232	-2.01904	-1.6567	-2.11542	-2.10603	-2.20446	-2.59504	-2.18197	-1.70124	-2.43067	-2.36273	-2.13619	-1.40691	-2.24213	-2.17174	-1.75189	-2.16674	-1.95146	-1.70151	-2.42759	-1.91621	-2.21714	-2.16844	-2.10792	-2.5336	-1.9082	-2.84797	-1.97413
YGL134W	0.49127	0.29343	0.49085	0.12651	0.46239	0.43221	0.48257	0.432895	0.307495	0.466055	0.44205	0.488255	0.273445	0.375315	0.387665	0.340435	-0.00785	0.21634	0.44114	0.53796	0.83974	0.573145	0.35254	0.710965	0.3192	0.246645	0.0093	0.328535	0.263865	0.409715	0.349005	0.044725	0.5715	0.69706	0.15345	0.19244	0.24683	0.518105	0.49635	0.987465	0.249455	0.05423	0.13379	0.33859	0.37568	0.273815	0.134	0.07696	0.414915
YDR425W	0.96199	0.88168	0.81029	0.72483	0.74973	1.31255	0.92468	0.915635	0.802875	0.949525	0.75044	0.866555	0.640495	0.752875	0.747645	0.631795	0.47604	0.83152	1.05818	0.96222	0.63443	0.908115	0.45617	0.704955	0.45121	0.801395	0.63827	0.576405	1.03456	0.507425	0.544955	0.812515	0.58813	0.69807	0.67354	0.65713	0.85109	0.760205	0.4043	0.685805	0.615875	0.72458	0.84668	0.82972	0.96782	0.854905	0.42096	1.20663	0.838875
YJR094W-A	-1.77533	-1.43355	-1.82805	-0.89186	-1.2859	-1.23013	-0.93331	-1.86119	-1.10326	-1.21189	-0.96692	-1.29527	-0.697065	-0.828695	-0.780005	-0.535485	-0.92194	-0.66628	-1.04177	-1.33192	-1.45323	-1.28635	-1.21829	-0.903265	-0.91636	-1.14576	-1.95787	-1.74195	-1.27852	-1.2793	-1.13462	-1.30981	-1.27208	-1.22485	-1.26916	-1.29582	-0.94962	-1.3701	-1.36865	-0.961485	-1.34841	-1.11592	-1.08836	-1.20575	-1.70129	-1.70666	-1.36244	-1.82792	-1.54726
YDR293C	0.64404	0.63754	0.51932	0.48614	0.6715	0.63051	0.9679	1.03411	0.887425	1.03974	0.86358	1.10126	1.10501	1.11367	1.21294	1.01961	1.03336	1.21032	0.94898	0.84591	0.78239	0.872695	0.79079	0.625375	0.91216	0.953095	1.20499	0.370005	0.485905	0.646755	0.628365	1.01509	1.09742	0.62831	0.53454	0.61083	1.03614	0.979665	0.83581	0.624705	0.729985	0.93769	0.60902	0.74449	0.64015	1.01975	0.89921	0.65939	0.996315
YBL113W-A	-0.75337	-0.46894	-0.28951	-0.54268	-0.0118	-1.13442	0.46602	-0.234765	0.256275	0.123375	0.301	0.090325	-0.710095	-0.254525	-0.497005	-0.454065	-0.04331	-0.39911	-0.5182	-1.06845	-0.21459	-0.328305	0.18369	-0.254175	0.9178	-0.579065	0.21423	-1.06743	-0.968705	-0.852145	-1.22218	-0.737945	0.35816	0.63066	-0.00789	-0.35945	0.74582	-0.195075	0.55922	0.283775	-0.611395	0.18826	0.21325	-0.20911	-0.0755	-0.988915	-0.38536	-0.46	-0.118455
YNR015W	-1.65577	-1.41764	-1.68075	-1.86718	-1.40028	-1.81882	-1.62057	-2.41759	-2.03222	-1.801	-1.94501	-1.73297	-1.70352	-1.9036	-1.86698	-1.6902	-2.04419	-1.68717	-1.04515	-1.84119	-1.72899	-1.56262	-1.35792	-1.49652	-1.34782	-1.29499	-1.62639	-1.60038	-1.64931	-1.41368	-1.71205	-1.68128	-1.7503	-1.55623	-1.54154	-1.78594	-1.31801	-1.61298	-1.62307	-1.70173	-1.80636	-1.33878	-1.73333	-1.5546	-1.81073	-1.80801	-1.61619	-1.64583	-1.72908
YKL006W	-2.40083	-2.39712	-2.31442	-2.37598	-2.07849	-2.5323	-1.11192	-1.73883	-1.33173	-1.26494	-1.05136	-1.11994	-0.996255	-0.998395	-0.892095	-0.617865	-0.93757	-0.69681	-1.83443	-2.77088	-2.19805	-1.98886	-1.80478	-1.40487	-0.78893	-1.81463	-1.43774	-1.81621	-2.42861	-1.69491	-0.878495	-1.32412	-1.41635	-1.41771	-1.89142	-2.05909	-1.54926	-1.72876	-1.79512	-1.31658	-1.2738	-1.0824	-1.66581	-1.27095	-1.55288	-1.8009	-0.92131	-1.67944	-1.76151
YLR456W	0.73401	0.45651	0.54472	0.4159	0.85083	1.23146	0.12693	0.120085	-0.032485	0.236735	0.10469	0.088075	0.246105	0.381475	-0.091985	0.063755	0.04876	0.23957	0.57702	0.21783	0.04678	0.008625	0.3532	0.222385	0.18903	0.352935	0.32009	0.845675	0.488815	0.445055	0.893735	0.810155	0.13546	-0.26728	0.35309	0.32383	0.45621	0.291535	-0.15472	0.231075	0.027355	-0.11078	0.07601	0.16481	0.56344	0.519465	-0.0301	0.56981	0.275675
YDR448W	-0.28055	-0.45866	-0.4543	-0.5756	-0.29278	-0.25861	-0.28895	-0.379335	-0.447025	-0.316325	-0.316	-0.371825	-0.088755	-0.145305	-0.218465	-0.349715	-0.18279	-0.20484	-0.15945	-0.70183	-0.22541	-0.488505	-0.09335	0.041345	-0.70432	-0.657845	-0.64778	-0.226735	-0.702935	-0.486015	-0.287485	-0.484705	-0.22166	-0.70808	-0.36759	-0.47952	-0.51809	-0.574635	-0.06298	-0.047155	-0.498475	-0.5039	-0.68009	-0.45059	-0.35515	-0.458785	-0.22228	-0.72934	-0.550635
YIL166C	0.27638	0.53853	0.4658	0.78713	0.39483	0.76697	1.09275	1.16898	0.814755	1.42772	1.02019	1.16898	0.292695	0.748695	0.508215	0.717835	0.64511	0.70268	0.84845	1.11789	0.56381	0.857755	1.11328	0.757195	0.93076	0.915615	0.55512	1.07489	1.16178	0.623425	0.499155	1.0592	0.70422	1.39756	1.10316	1.29955	0.59462	0.768235	0.81447	0.772335	0.537175	0.97971	0.89852	0.91408	0.58205	0.765965	0.55758	1.07265	0.634225
YDR097C	-2.09644	-1.91959	-1.76407	-1.95397	-1.98806	-2.15467	-1.99295	-1.90263	-2.08093	-1.9686	-2.15371	-1.62664	-1.05469	-0.755665	-0.935905	-0.859975	-0.89255	-1.08946	-1.5226	-1.69393	-1.81222	-1.46871	-1.79023	-1.5944	-2.1896	-1.84284	-1.82864	-1.82384	-1.84752	-1.5453	-1.58757	-1.67033	-2.25257	-1.76747	-1.77931	-1.58869	-2.08919	-1.74147	-1.69091	-1.91907	-1.587	-1.86298	-2.17825	-1.45171	-1.99429	-1.76751	-2.08614	-2.07056	-1.92542
YER184C	0.0517	0.12615	0.08161	0.52426	0.09915	0.28409	0.17303	0.559335	-0.324765	0.344755	-0.13088	0.530895	-0.101325	0.466255	-0.013105	-0.027015	-0.01839	0.22552	-0.07376	-0.1381	-0.02899	0.143015	-0.09404	0.090035	0.11444	0.204345	0.19811	0.302105	0.066795	0.452825	-0.384065	0.822355	0.04366	0.10308	0.06161	0.57223	0.13953	0.240955	0.17191	0.330615	0.247215	0.22696	-0.13174	0.37789	-0.02331	0.575055	-0.15773	0.43915	-0.137905
YJL047C-A	0.1186	0.64867	0.16588	0.42373	-0.53426	-0.55072	-1.05534	1.76798	1.08197	0.047215	-0.60447	1.9712	0.008525	0.785515	0.092565	-0.116575	1.97364	-0.20588	-0.24898	-0.01922	-0.61423	-0.316385	0.10966	-1.23135	-1.32682	0.853455	1.65836	0.783015	0.355775	0.802235	0.717535	-0.068285	0.51754	-0.15316	0.66621	0.34586	0.18216	1.13495	0.9168	-0.453705	-0.417475	0.11141	0.39458	0.68739	0.0689	0.978755	1.13374	0.47207	0.194915
YJL066C	2.77501	2.17298	2.66598	2.3723	2.51871	2.65616	2.46021	2.35019	2.21956	2.21229	2.37854	2.5766	2.15016	1.68918	2.32179	1.68223	2.15665	2.02843	2.61911	2.61174	2.30977	1.95887	1.92548	2.1319	2.01784	2.04435	2.55592	1.8235	2.60335	1.91999	2.10845	2.09852	2.10209	1.57925	2.40498	2.31951	2.16419	2.0148	1.94776	2.00176	2.14214	2.0065	2.25695	1.45872	2.38057	2.16412	2.52233	2.30378	2.48766
YLR368W	0.33292	-0.0041	0.23251	0.28804	0.01116	0.41029	-0.08009	-0.110045	-0.142805	-0.184345	-0.3634	-0.136275	-0.204785	-0.014345	-0.102545	0.055135	-0.29362	-0.24135	0.10007	-0.03816	-0.15048	0.372175	-0.09228	-0.142535	0.01613	0.090865	-0.14833	0.246295	-0.410425	-0.388605	-0.417385	0.502795	-0.09162	-0.35592	-0.08042	0.0848	0.17199	0.403085	-0.11591	-0.305675	0.173705	-0.23208	-0.22169	-0.04693	0.15783	-0.233125	0.08299	0.46794	-0.150295
YOR194C	-0.36479	-0.06088	-0.47181	-0.1134	-0.78573	-0.37581	-0.6352	-1.10576	0.075265	-0.136665	-0.06494	-0.508825	-0.018185	-0.693405	-0.432055	-0.598315	-0.72353	-0.90484	-1.12734	-0.3916	0.44566	-0.729365	-0.30342	-0.356015	-0.96579	-0.304305	-0.77913	-0.270685	-0.340745	-0.720785	1.09472	-0.422995	-0.09724	-0.21947	-0.33662	-0.32293	-1.36351	-0.331475	-0.64147	-0.092055	-0.506325	-1.06852	-0.36912	-0.39576	-0.4379	-0.310265	-1.38856	-1.54131	-0.466435
YKL095W	0.097	0.36437	0.13188	-0.03773	-0.14876	0.12686	-0.0316	-0.035635	0.647905	0.563445	0.30883	0.048795	0.943775	0.765415	0.810005	0.570055	0.55405	0.36637	-0.3598	-0.15805	0.68198	0.338145	0.35501	-0.034595	-0.03621	0.204685	0.03924	0.351685	-0.287985	-0.010875	0.993165	-0.081565	0.44771	0.36148	-0.03989	0.28162	-0.45165	-0.113575	0.12669	0.326035	-0.033855	0.07281	-0.1264	0.41112	0.24533	0.326745	-0.22684	-0.1695	0.253265
YGR060W	-1.7821	-1.82084	-1.64941	-1.66532	-1.86643	-2.02783	-2.11851	-2.4857	-2.02187	-2.45453	-2.31068	-1.95992	-2.19272	-2.16596	-2.06611	-1.66517	-2.14311	-2.14822	-1.67143	-2.11063	-3.13131	-2.31528	-1.88501	-2.21291	-1.75879	-2.01528	-2.33883	-2.50689	-1.43966	-1.99639	-2.78187	-2.50364	-2.4047	-1.97793	-1.80872	-2.06635	-1.97539	-2.30279	-1.89189	-2.25364	-1.84987	-1.61552	-1.51993	-2.04114	-3.505	-2.51225	-2.39703	-2.80765	-2.78327
YIR044C	2.55715	2.47169	2.64622	2.83617	2.68183	2.48275	1.16114	1.43583	1.85755	1.45104	0.90818	0.666745	0.383805	0.731105	0.869845	0.725445	0.81707	1.26666	0.80922	1.18665	0.74274	1.06593	2.41316	1.77364	1.53793	1.30787	1.70813	2.16372	1.15714	1.32953	2.54331	2.73069	2.91111	2.41235	3.15186	2.53863	2.42583	2.79907	2.66674	1.8181	1.12227	1.72327	1.3543	0.33771	2.73297	1.14149	0.87345	1.24782	1.29649
YHR041C	-0.09819	-0.26	-0.08626	-0.19889	0.16919	-0.33301	-0.05029	0.020955	0.263625	-0.170925	0.35052	-0.133115	-0.423725	-0.749795	-0.436005	0.178895	-0.45127	-0.32728	-0.24914	-0.90738	-0.33436	-0.386275	-0.05118	-0.235485	0.60372	-0.256405	0.3028	-0.493555	-0.313755	0.326855	-0.538105	-0.338625	-0.09049	-0.35575	-0.44107	-0.53976	-0.08044	-0.325015	0.14563	-0.461045	0.098015	0.59304	0.02458	0.14892	0.03079	-0.002215	0.20902	-0.24651	0.101105
YBR115C	-1.99773	-1.95199	-1.79598	-1.69883	-1.81855	-2.13544	-1.50804	-1.6885	-1.82049	-2.09435	-1.93353	-1.58119	-1.89355	-1.54337	-1.62182	-1.29207	-1.40515	-1.40884	-1.39548	-1.3898	-1.93192	-1.18081	-1.23634	-1.25991	-1.8679	-1.71718	-1.05252	-1.6057	-1.64402	-1.51229	-1.84369	-1.20904	-1.74074	-1.10632	-1.37161	-1.10008	-1.29454	-1.34806	-1.20975	-1.6644	-1.18517	-0.98912	-1.60285	-1.20784	-1.63672	-1.66395	-1.34598	-1.46782	-1.83215
YCR097W	1.1958	0.64527	0.88974	1.03117	1.19971	0.99456	0.83328	0.024075	1.22884	1.27136	1.12242	0.790635	0.537605	-0.090455	0.490585	0.393165	0.03353	0.54114	0.69108	0.59159	0.01393	0.767045	0.64961	0.606715	0.30578	1.05384	0.64035	1.6119	0.840295	1.02394	2.4396	0.748115	0.28628	0.55757	0.83947	0.60565	0.3309	0.321045	-0.02964	-0.018685	1.10857	-0.27839	1.15861	-0.10593	1.25091	0.773335	0.82111	0.54807	1.02504
YBR147W	2.77924	2.66479	2.66377	2.72908	2.86082	3.14277	3.61778	3.327	2.78873	3.63264	3.43231	3.63503	1.83157	2.06981	2.32717	2.66017	2.20586	2.46572	2.83109	2.38446	3.61273	3.78701	3.49607	2.40929	3.12522	3.46373	3.68679	3.98373	2.31485	2.44591	1.81933	3.81081	3.02941	3.17782	2.52646	2.48273	3.75534	3.16646	3.26003	2.51361	3.80958	4.32662	3.3125	4.08111	3.43189	2.75174	3.67651	3.322	3.03397
YFL003C	0.26565	0.27193	0.60117	0.28351	0.13049	0.54752	0.02512	-0.438465	-0.031335	0.125385	-0.04128	0.178205	-0.016395	0.168815	-0.072515	-0.040115	-0.02647	-0.00922	0.60561	0.51019	0.77964	0.887975	0.33919	0.693245	0.24395	0.233915	0.59751	0.475685	0.421675	0.454695	0.473455	0.744995	1.09161	0.39495	0.43446	0.76857	0.15509	0.498105	0.27409	0.519385	0.595105	0.39294	0.53268	1.11846	0.7098	0.626845	0.37479	0.46826	0.137555
YHR086W	-0.1438	0.01039	0.09441	0.23906	-0.05091	-0.0613	0.30712	0.536505	0.381825	0.263505	0.16381	0.240355	-0.029615	0.048655	0.114715	0.070965	0.19425	0.41543	-0.0374	-0.30674	-0.40792	-0.186665	-0.02519	0.008725	0.4626	-0.023925	0.20081	-0.214095	-0.050705	-0.129505	-0.509055	0.214695	0.11518	-0.00842	-0.27627	-0.23924	0.18731	0.067125	0.32897	-0.030105	0.377135	0.9796	-0.04826	0.13797	0.02873	-0.128345	0.42732	0.60383	-0.030715
YOL120C	-2.65276	-2.33883	-2.42329	-2.02694	-2.32209	-2.61819	-1.25345	-1.43929	-1.17321	-1.25551	-1.20792	-1.10739	-1.14173	-1.08127	-1.00009	-0.667345	-0.92497	-0.81635	-2.03173	-2.47343	-2.46167	-1.68708	-1.88661	-1.40846	-1.11116	-1.89058	-1.47444	-2.42812	-2.54955	-1.71759	-1.27683	-1.36119	-1.5025	-1.3547	-2.05178	-2.19159	-1.37834	-1.59933	-1.7773	-1.24819	-1.44321	-0.89495	-1.79622	-1.35461	-2.07673	-2.10771	-1.09119	-1.85449	-2.04134
YML079W	0.14158	-0.35271	-0.16227	-0.35389	0.11353	-0.17232	-0.11937	-0.303885	-0.175865	0.045255	0.02708	0.019035	0.151825	-0.085715	0.195635	0.270725	0.03596	0.06078	0.11446	-0.15432	-0.09712	-0.261235	-0.09781	0.210895	-0.19799	-0.104835	-0.30098	-0.351575	-0.407125	-0.300525	-0.239945	-0.251175	0.04419	-0.12902	-0.24756	-0.50912	0.16084	-0.087805	-0.14524	0.094285	-0.377355	0.00234	-0.19936	-0.39067	0.17518	-0.291365	-0.01953	0.10142	-0.092495
YOR125C	0.85171	0.75082	0.96341	1.04033	0.59569	0.43471	1.37542	1.34357	1.13156	1.27936	1.47819	1.1983	1.54974	1.72042	1.71256	1.60798	1.66832	1.69415	1.13276	0.90251	1.41733	1.03964	0.85948	1.11092	0.71268	0.851445	1.08668	1.2854	0.601685	1.21782	1.35794	0.992595	0.75588	0.54876	0.9038	0.96475	0.97488	0.853965	0.91667	1.25673	0.857435	0.61039	1.34097	0.77193	1.36732	1.2588	1.24686	1.12158	1.34003
YLR065C	-0.36945	-0.41147	-0.36492	-0.43692	-0.1279	-0.66152	-0.67432	-1.03482	-0.559535	-1.20518	-0.52147	-0.726515	-0.291885	-0.644075	-0.480715	-0.522845	-0.45813	-0.53199	-0.55919	-0.83415	-0.84903	-1.11447	-0.43574	-0.439595	-0.51784	-1.0052	-0.6929	-0.524485	-0.771655	-0.439705	-0.564735	-0.648595	-0.7403	-0.75264	-0.56834	-0.67595	-0.75975	-1.04853	-0.72389	-0.637285	-0.632365	-0.84732	-0.47275	-0.9054	-0.49964	-0.791835	-0.78958	-0.99374	-0.642035
YNL298W	-0.5833	-0.55537	-0.53876	-0.756	-0.23825	-0.58158	-0.29316	-0.476175	-0.311425	-0.706025	-0.4256	-0.481245	-0.162795	-0.155615	0.159125	-0.178755	-0.19606	0.01785	-0.04835	-0.48011	-0.60663	-0.541465	-0.35177	-0.479935	-0.53872	-0.538245	-0.33504	-0.602175	-0.127865	-0.572665	-0.930295	-1.08394	-0.57361	-0.64858	-0.57212	-0.56299	-0.24016	-0.503125	-0.33456	-0.610775	-0.785965	-0.40857	-0.81511	-0.4155	-0.56632	-0.903785	-0.43034	-0.59461	-0.220705
YPL134C	-0.18945	-0.3648	-0.05225	-0.31957	0.17664	-0.06365	0.56223	0.860885	0.447835	0.618385	0.40844	0.648255	0.027685	0.382185	0.310985	0.347305	0.33585	0.65025	0.16477	-0.01607	0.23263	0.406245	0.37589	0.770415	0.68374	0.528185	0.34616	-0.211005	-0.035975	-0.020915	-0.116575	0.298125	0.18525	0.28184	-0.16047	0.13218	0.4079	0.271355	0.60574	0.429385	0.293355	0.7544	0.18179	-0.12009	-0.04105	-0.031685	0.29868	0.32378	-0.046685
YER078C	0.58207	0.51588	0.63691	0.39071	0.5894	0.45501	0.83971	1.06153	0.631935	0.596765	0.64999	0.923165	0.640205	0.733965	0.819765	0.634115	0.64981	1.06262	0.93425	1.03234	0.4114	0.708695	0.62678	0.861045	0.41666	0.437765	0.41201	0.292995	0.196115	0.170825	0.246855	0.838615	0.33899	0.64522	0.58389	0.57963	0.65945	0.660135	0.62622	0.923375	0.356835	0.37465	0.1192	0.13735	0.22035	0.134245	0.5957	0.60019	0.421375
YGL225W	-1.46587	-1.24113	-1.38755	-1.08837	-1.20035	-1.49902	-1.05948	-1.03381	-0.866225	-1.43371	-1.09819	-1.04804	-0.941855	-1.07269	-1.11261	-0.775995	-0.86453	-0.86057	-1.44951	-1.79047	-1.73169	-1.21775	-0.92174	-1.14301	-0.60611	-1.36538	-0.89889	-1.19083	-1.38824	-0.950565	-2.00738	-1.32542	-1.64141	-1.45591	-1.2093	-1.45521	-1.33065	-1.47213	-0.74774	-1.06056	-1.25657	-0.85077	-1.32536	-0.82504	-1.35708	-1.12028	-1.29427	-1.77426	-1.31888
YLR129W	-2.89489	-2.73444	-2.60094	-2.65476	-2.51489	-2.67473	-2.87528	-2.87827	-2.53726	-3.07931	-2.87491	-2.61904	-1.70921	-1.8157	-2.00766	-1.67163	-2.01785	-2.15994	-2.37222	-2.8828	-2.62267	-2.69063	-2.27012	-1.99487	-2.86217	-2.59835	-2.77447	-2.87078	-3.14589	-2.43022	-2.8144	-2.55254	-2.4574	-2.01059	-2.55727	-2.54135	-2.39895	-2.49926	-2.34999	-2.40072	-2.60261	-2.5243	-2.82759	-1.98737	-2.91936	-3.02243	-2.75387	-3.32114	-2.4554
YNL224C	0.21805	0.04706	-0.03853	0.02238	-0.01152	0.22197	-0.0652	-0.373185	0.307175	0.458645	0.28642	0.103365	0.656055	0.655845	0.408795	-0.050895	0.25648	0.518	-0.40148	-0.02501	0.45375	-0.093825	-0.09201	0.034755	0.05689	0.204145	-0.06509	-0.087575	-0.098285	0.054635	0.896325	-0.093915	-0.18881	-0.09936	-0.16827	0.00234	-0.4549	-0.121195	-0.05671	0.326815	-0.026615	-0.50204	-0.00781	-0.28422	0.01163	0.215295	-0.48265	-0.40478	0.009045
YNL122C	0.30478	0.15002	0.23833	0.15167	0.09943	-0.13801	0.22264	0.162175	0.577365	-0.206825	0.42104	0.333165	0.145675	0.034015	0.172525	-0.042335	0.08386	-0.0471	0.22543	0.12883	0.28	-0.113795	-0.02233	0.122785	0.10206	0.434115	0.15803	0.512865	0.383365	-0.044015	1.27609	0.032865	-0.10555	0.93349	0.58479	0.67434	0.48193	0.463715	-0.43893	0.385805	-0.030245	-0.26958	0.05965	-0.07744	0.18829	0.276535	-0.00718	0.76218	0.076775
YGL066W	0.48649	0.47824	0.12365	0.2826	0.17714	0.61991	0.12595	-0.022825	0.759875	0.455435	0.62212	0.399695	0.524385	0.150115	0.410735	0.011605	0.03581	0.10767	0.33604	0.90264	0.87623	0.391475	0.31781	0.247015	0.1427	0.338975	-0.18956	-0.246035	0.382775	0.074115	0.593915	-0.111945	0.66229	0.50463	0.23193	0.52756	0.05131	0.469925	-0.04313	0.317335	-0.124645	0.06324	0.45435	0.50134	0.38371	0.226005	0.28115	0.21114	0.276725
YNL217W	-0.57605	-0.40338	-0.44	-0.41185	-0.87616	-0.65249	-0.5574	-0.800145	-0.577855	-0.484335	-0.566	-0.426205	-0.701605	-1.13628	-0.859265	-0.698435	-1.1139	-1.18057	-0.52735	-0.6787	-1.23083	-1.2206	-0.50198	-0.746045	-0.59147	-0.622575	-1.41374	-0.599705	-0.155015	-0.193985	0.144845	-0.523885	-0.79317	-0.40608	-0.46982	-0.61642	-1.01386	-1.01608	-0.50139	-0.384975	-0.672815	-0.93719	-0.28306	-0.10706	-0.53001	-0.354845	-0.62301	-0.39604	-0.799545
YCL067C	1.10842	0.6411	1.01131	0.83927	0.0975	0.76226	0.68196	-0.146405	1.18298	0.471495	1.16909	0.354275	0.260275	0.023255	0.320455	-0.018075	-0.29644	-0.18675	-0.02016	1.19926	0.31036	-0.715635	0.27225	0.517785	0.00782	0.772075	0.28327	1.87048	1.18135	0.565815	2.35826	0.387355	-0.25478	0.09744	0.74746	0.64638	-0.4977	0.681325	-0.74733	0.406495	0.679545	-0.60402	0.86646	0.14516	0.91992	0.803945	0.09464	-0.29855	0.329985
YGL063W	-0.0777	-0.36799	-0.34675	-0.15172	-0.18691	-0.23054	-0.08688	-0.217625	-0.080295	-0.062275	0.00554	-0.401405	-0.237235	-0.169165	-0.100185	0.014835	-0.26282	0.21479	-0.22662	-1.06461	-0.15789	-0.374905	-0.24683	-0.847335	0.35061	-0.495555	0.04839	-0.387665	-0.423835	-0.225175	-1.5818	-0.535295	0.23798	0.00655	-0.37789	-0.87666	0.05831	-0.205725	0.09806	-0.355905	0.287095	0.72776	0.14886	-0.12259	-0.19738	-0.222945	-0.01442	0.15749	0.262455
YML030W	0.82451	0.92142	0.68518	0.5739	1.16571	0.96989	0.80274	0.477535	1.09122	0.953345	1.50477	0.723785	0.975115	0.479205	0.736155	0.595815	0.72718	-0.02301	0.31018	0.90149	1.57076	0.744375	1.00799	1.19859	0.92592	0.832735	0.86766	1.41562	0.513395	1.09312	1.94863	0.708745	0.86285	0.40892	1.00986	0.76467	0.22001	1.07076	0.75565	1.38363	1.09994	0.44678	0.48682	0.68865	0.91431	1.03992	1.04709	0.24613	0.699545
YAL039C	0.15537	0.11539	0.47858	-0.00615	0.5828	0.13001	0.09705	0.141995	-0.328495	-0.001895	0.16596	-0.038505	-0.165395	-0.119365	0.002905	0.313535	-0.02008	0.6619	-0.21087	0.28839	0.16031	0.163975	-0.28731	0.336485	0.75849	0.546555	-0.23742	-0.342825	-0.556875	0.974645	-0.589705	-0.481175	-0.18151	0.19845	0.41805	0.4886	0.45592	0.555745	-0.04282	0.090355	-0.699555	0.23397	-0.21409	-0.14229	0.38947	0.647715	0.55859	0.14679	-0.436375
YOR261C	0.50628	0.33766	0.29314	0.39796	0.00512	0.79282	0.13643	0.004265	0.410875	0.229105	0.28221	0.445735	0.826275	0.652615	0.705935	0.470395	0.14314	0.25439	-0.18838	0.74749	0.49417	0.072975	-0.03713	0.363525	0.04439	0.600375	-0.58301	0.482055	0.107755	0.515105	1.22568	0.179135	-0.04056	0.44466	0.34372	0.41701	-0.53226	0.567085	-0.06648	0.732685	0.006885	-1.10441	-0.12287	-0.19189	0.34934	0.407785	-0.24535	-0.26459	-0.126785
YMR316W	-0.11118	0.20007	0.40453	0.57044	0.01344	0.0264	-0.47401	-0.039245	-0.291355	-0.133075	0.13695	-0.166075	-0.200105	0.207675	-0.091285	-0.608085	-0.04293	-0.24316	-0.42918	0.33111	-0.30234	-0.006635	0.28211	-0.078355	-0.35922	0.234505	0.15356	0.451795	0.512935	2.36739	0.361535	-0.498335	-0.37803	0.02886	0.14196	-0.39788	-0.19696	0.011845	-0.16413	-0.338925	-1.12641	0.66765	-0.49941	-0.26514	-0.37708	2.62008	-0.83633	0.32851	-0.778465
YLR191W	-0.05329	-0.0077	0.13968	0.03008	0.03029	-0.12823	0.12723	0.197765	0.035155	-0.083455	0.20978	0.066795	0.035245	0.039105	0.012955	-0.148455	0.11926	-0.00886	-0.11602	-0.37373	-0.06091	-0.382485	0.09652	-0.115355	-0.08658	-0.292615	-0.21441	0.251205	0.032245	0.125615	0.048365	-0.337065	-0.10292	-0.01066	0.01227	-0.21397	-0.24434	-0.285215	0.01676	-0.170615	-0.247265	-0.073	-0.24513	0.19423	-0.24306	-0.164505	-0.13169	-0.05125	-0.085535
YCR027C	-0.05478	0.191	0.25793	0.3758	0.37067	-0.12445	0.00162	0.022265	-0.131295	-0.192035	-0.21505	0.097685	-0.055035	0.176175	-0.130175	0.122635	0.2145	0.24798	-0.00113	-0.37562	-0.51579	-0.173845	-0.02283	-0.022515	0.14475	0.034505	0.01879	-0.011525	-0.019165	-0.081405	-0.640115	-0.059505	-0.09753	-0.0823	0.03756	0.0585	0.17329	-0.167055	0.15164	0.077495	0.268455	0.35602	0.08552	0.21726	-0.05993	-0.152375	0.00022	0.14868	-0.150965
YER125W	-0.0713	-0.06931	-0.18766	0.05801	-0.06762	-0.06966	0.27031	0.593985	0.197195	0.165335	0.08402	0.295045	0.154035	0.533285	0.447025	0.245805	0.6748	0.32912	-0.11019	-0.00815	-0.00683	0.097265	0.19582	0.307195	0.4521	0.230035	0.06239	-0.302345	-0.248015	-0.110505	-0.475935	-0.009645	0.20567	0.12763	-0.24689	-0.16559	0.18481	0.559785	0.32716	0.142475	0.023925	0.19487	-0.32189	0.23289	-0.13925	0.084815	0.34338	0.11272	-0.149695
YDL046W	0.24376	0.28101	0.23225	0.28363	0.18158	0.27883	0.69242	0.706165	0.643465	0.558105	0.88218	0.551865	0.540975	0.564205	0.602065	0.678895	0.8324	0.45677	-0.06873	-0.26014	0.36907	0.402935	0.17538	0.167235	0.86098	0.200305	0.6791	0.250465	-0.456555	0.434355	0.004625	-0.042805	0.38208	-0.15273	0.01463	-0.12003	0.42783	0.305235	0.20788	0.153955	0.483465	1.23059	-0.03155	0.31419	0.05155	0.253115	0.32025	0.30498	0.178225
YMR263W	-0.56505	-0.32486	-0.60538	-0.45208	-0.97257	-0.32898	-0.75374	-0.757745	-0.349255	-0.267805	-0.22705	-0.702165	-0.173885	-0.497915	-0.232365	-0.419005	-0.7478	-0.5946	-0.97224	-0.51962	-0.33778	-0.948075	-0.40507	-0.162685	-0.50486	-0.143075	-0.72499	-0.465245	-0.456375	-0.359255	0.944225	-0.317835	-0.38817	-0.17416	-0.51855	-0.19854	-1.1282	-0.735115	-0.56235	-0.094835	-0.766405	-0.77636	-0.49028	-0.63688	-0.63201	-0.295965	-1.22163	-1.32525	-0.565515
YOL113W	1.02766	0.92501	0.90262	1.00333	0.64859	1.18015	0.92804	1.12709	1.13977	1.29829	1.11439	1.14806	0.184675	0.615665	0.445685	0.209565	0.38292	0.8078	0.13849	0.67431	0.59025	0.778415	0.89992	0.714295	0.29323	0.554825	0.86602	1.49211	1.35804	0.686235	1.26262	0.438035	0.43495	0.44192	0.77361	0.93379	-0.09714	0.396905	0.64985	0.684095	0.178475	0.29205	0.93922	1.0844	1.05686	0.787555	0.22009	0.30185	1.01917
YAL001C	0.80962	0.71929	0.61678	0.54798	0.68026	0.69871	0.70655	0.761445	0.837565	0.833625	0.87078	0.753555	0.870885	1.13948	0.727605	0.548925	0.65661	0.66107	0.19167	0.57106	0.70098	0.405835	0.35118	0.765145	0.25473	0.255895	0.38312	0.044895	0.094615	0.518155	1.06612	0.547455	0.49948	1.01162	0.47707	0.58048	-0.12555	0.381485	0.26831	0.615585	0.495795	-0.03296	0.27776	0.41992	0.35606	0.602375	0.42901	0.31176	0.619445
YDR517W	0.92109	0.67941	0.8899	0.92121	0.78053	0.70352	0.71788	0.956795	0.477595	0.311695	0.41779	0.854005	0.435885	0.141965	0.167145	0.148685	0.25189	0.3109	1.25934	1.20152	0.08776	0.224175	0.3534	0.223505	0.63301	0.500795	0.57213	0.595265	0.991445	0.638135	0.153385	0.661105	0.58941	0.53433	1.45856	1.20064	0.44628	0.486105	0.55178	0.251555	0.572275	0.72093	1.05527	0.86212	0.61702	0.668515	0.88359	0.38136	0.839455
YBR197C	-0.48865	-0.93008	-0.69627	-1.18632	-0.36027	-0.98635	-0.68164	-0.535385	-0.154685	-0.847095	-0.7332	-0.715845	-0.281945	-0.164215	-0.329315	-0.307715	-0.2165	-0.08323	-0.42496	-1.01323	-0.32073	-0.160435	-0.77506	-0.938875	-0.28468	-0.495695	0.22803	-0.107095	-1.13967	-0.458295	-1.24405	-0.985955	-0.60185	-0.42688	-0.87432	-0.81736	-0.04253	-0.545315	-0.38707	-1.09181	-1.00232	-0.49544	-0.68015	-0.50818	-0.51325	-0.382815	-0.77486	-0.85792	-0.823455
YJR132W	-0.80758	-0.91917	-0.96834	-0.7544	-0.81168	-0.86276	-1.29121	-0.958255	-1.29262	-1.44741	-1.46716	-1.1919	-0.923865	-0.863435	-1.01588	-0.731625	-0.99524	-1.05206	-1.47176	-1.46606	-1.36558	-0.871255	-1.23352	-0.989425	-0.77669	-1.13116	-0.99942	-1.23693	-1.30817	-0.783515	-2.06323	-0.926505	-1.32718	-0.7597	-1.23657	-1.10394	-0.73139	-0.637565	-1.11451	-1.31095	-0.968495	-0.9355	-1.27834	-0.69195	-1.11838	-0.986075	-1.32903	-1.34241	-1.09281
YDR192C	0.15567	-0.14507	0.11556	-0.09207	0.47774	0.17636	0.39927	0.262825	-0.084855	-0.078945	0.16482	0.064975	0.166945	0.211635	0.140355	0.132615	0.22534	0.38045	-0.01847	-0.17591	0.05319	0.027125	-0.01815	-0.415885	0.18996	-0.178705	0.42069	-0.273905	-0.255395	0.020555	-0.230885	0.162195	-0.09612	-0.34086	-0.13442	-0.34991	0.39005	-0.220425	-0.03268	-0.462585	0.321545	0.43546	-0.08585	-0.33084	-0.07703	-0.228435	0.40952	0.30447	0.205765
YER021W	0.75153	0.32093	0.55049	0.42054	0.33558	0.50452	0.93125	1.02449	0.547105	0.752905	0.71661	0.844255	0.961955	1.02418	1.02146	0.714835	0.99565	0.82654	0.87928	0.91065	0.25724	0.420125	-0.11862	0.484195	-0.07256	0.340515	0.10927	0.343375	0.491695	0.504385	0.559735	0.756785	0.28337	0.44757	0.34721	0.70902	0.38077	0.564245	0.21952	0.541155	0.386945	-0.44481	0.54673	0.16486	0.54247	0.406285	0.1409	0.26866	0.304195
YKL014C	-3.2342	-2.78343	-2.77812	-2.6749	-3.03159	-2.88868	-2.76537	-2.87364	-2.69318	-2.9691	-3.09259	-2.292	-2.49615	-2.31055	-2.35298	-1.7449	-2.53792	-2.37272	-2.24848	-2.72423	-3.07669	-2.45662	-2.46732	-2.1677	-2.7449	-2.45661	-2.7194	-2.83555	-2.69622	-2.39705	-2.74853	-2.186	-2.90446	-2.21492	-2.69062	-2.40286	-2.4417	-2.34411	-2.48517	-2.64358	-2.50083	-2.24112	-2.83644	-1.74639	-3.30888	-2.96073	-3.14197	-3.27528	-2.94096
YGL034C	1.8706	0.01814	0.61702	0.46007	1.09413	0.06545	0.29878	0.043815	-0.297445	0.010755	0.40668	-0.792635	-0.303065	0.201095	-0.222885	1.07943	-0.01863	-0.45258	1.33882	0.3121	0.49603	0.660265	1.5174	-0.443605	0.11784	1.17881	0.36152	0.483065	0.524475	0.308825	0.121065	-0.132375	1.94625	1.31713	0.54684	0.22065	1.1224	0.110815	0.06843	-0.846415	0.668255	0.12447	0.67938	1.10294	1.94332	0.392595	0.83582	0.85555	0.787735
YGR197C	0.71812	0.74798	0.93146	0.96724	1.00826	0.5058	0.81544	0.867125	0.835785	0.722545	0.73158	0.823005	0.267655	0.379715	0.403585	0.459115	0.42394	0.50173	0.29617	-0.1404	-0.20613	0.345905	0.51634	-0.224005	1.02295	0.763955	0.61143	0.570915	0.392555	0.842895	-0.217345	0.188525	0.58581	0.28491	0.31235	0.302	0.57031	0.431685	1.05685	0.073775	0.732075	1.30102	1.24503	1.21769	0.45924	0.355315	0.7968	0.67364	0.484305
YDL106C	0.48187	0.58824	0.53062	0.35577	0.43956	0.75231	0.48956	0.765555	0.553595	0.876745	0.54567	0.591315	0.569195	0.525705	0.595675	0.589915	0.61499	0.54954	0.69506	0.90152	0.36716	0.449345	0.48847	0.777485	0.00252	0.631085	0.00664	0.161315	0.560525	0.290715	0.663585	0.536975	0.47398	-3e-05	0.11964	0.66154	0.31934	0.657935	0.35726	0.958305	0.773395	0.29587	0.33141	0.34415	0.54481	0.604875	0.26413	0.64169	0.251615
YDR365C	-2.98368	-2.54141	-2.47493	-2.67529	-3.18368	-2.97061	-3.70712	-4.643	-2.86677	-3.47734	-3.37949	-3.2613	-2.94859	-3.40835	-3.22967	-2.51125	-3.63734	-3.57288	-2.27277	-1.43518	-1.35943	-1.60391	-1.38331	-1.78649	-3.42873	-2.93298	-3.19387	-3.19566	-1.63678	-2.68183	-2.22985	-2.86238	-2.05653	-1.66161	-2.95818	-3.05953	-3.59246	-3.46924	-3.09813	-3.53092	-3.33163	-2.95341	-2.91778	-2.0441	-3.84251	-3.38331	-3.96181	-4.15208	-3.59321
YNL280C	-1.21351	-0.78916	-1.09663	-0.93722	-0.9496	-1.17831	-0.57356	-0.491345	-0.484225	-0.894825	-0.33312	-0.532365	-0.967785	-0.899605	-0.812205	-0.433255	-0.50697	-0.57047	-1.23732	-1.63997	-0.86695	-0.611645	-0.3058	-0.641995	-0.40695	-0.989965	-0.43739	-0.813645	-0.787115	-0.682885	-1.13058	-0.612155	-0.98527	-0.77241	-1.4126	-1.06526	-0.76386	-0.739965	-0.74806	-1.38603	-0.442215	-0.49855	-0.75093	-0.40462	-0.79297	-0.951065	-0.41905	-0.75006	-0.675605
YCR030C	1.46108	1.3605	1.43212	1.33509	1.46861	1.15514	2.07034	2.05316	2.05007	2.16927	1.98495	2.0275	1.84838	1.43626	1.7201	1.4583	1.57214	1.8213	1.52922	1.31125	1.26013	1.27808	1.67418	1.10641	1.80002	1.17894	1.77609	1.10586	1.42223	1.63116	1.84865	1.57726	1.72912	1.41363	1.48481	1.36017	1.55065	1.53538	1.73113	1.37949	1.86997	1.91633	1.48884	1.41001	1.65778	1.54272	1.80231	1.57585	1.70294
YDL154W	-0.78967	-0.71957	-0.78713	-0.68973	-0.64019	-0.06143	-0.22018	-0.181795	-0.138835	0.129565	-0.45365	-0.038145	0.392335	0.678215	0.325885	0.561185	0.39993	0.46743	-0.36605	-0.39221	-0.21112	-0.267055	-0.21236	0.326255	-0.88423	-0.430015	-0.94034	-0.377655	-0.705725	-0.541045	0.204125	0.051615	-0.1673	0.70044	-0.57881	0.40439	-0.69586	-0.129645	-0.51266	-0.093655	-0.394935	-0.30227	-0.76263	-0.56402	-0.31455	-0.450745	-0.76012	-0.54714	-0.355075
YDR505C	1.11747	1.10667	0.84591	1.14732	1.01459	1.26032	1.23573	1.69216	1.53747	1.46061	1.11539	1.48803	1.11123	1.26141	0.985945	0.908455	1.10688	1.09964	1.27963	1.47826	0.58762	1.11953	1.03792	1.07001	1.09716	1.07593	0.83331	0.591085	1.3539	1.08675	0.392905	1.29245	1.45588	1.40652	0.94279	1.25721	1.35869	1.66227	1.20247	0.784765	0.950775	1.2723	1.36013	0.98471	1.04105	1.43152	0.99482	1.09745	1.21494
YGL033W	-0.35518	-0.4893	-0.12972	-0.25602	-0.76015	0.25732	-0.1649	-1.45548	-0.408085	-0.239185	0.08829	-0.127545	-0.075655	-0.505295	-0.499895	0.083065	-0.38158	0.19501	-0.1924	0.01404	0.74476	0.123615	-0.11058	0.064045	0.50289	0.102815	0.11016	0.009005	-0.102435	-0.054125	0.328845	0.001555	0.24578	0.27209	0.10771	0.40482	-0.17905	-0.961355	0.33296	0.717625	0.920645	-0.06088	0.02958	0.32365	0.03078	-0.014395	-0.17334	0.17242	-0.068835
YMR211W	-1.18433	-0.83862	-0.95992	-0.96816	-1.10093	-1.06891	-1.0437	-0.429935	-1.00866	-1.14766	-1.1261	-0.817495	-1.35573	-0.989035	-1.26795	-1.06576	-1.10845	-1.27017	-0.73239	-0.79308	-0.92028	-0.748015	-1.14782	-1.15654	-0.99016	-0.882405	-0.9788	-0.820405	-0.811065	-0.993395	-1.20792	-0.815285	-1.17015	-0.86895	-0.81615	-0.90878	-0.63984	-0.688065	-1.26744	-1.23097	-0.945255	-1.02174	-0.79905	-0.63272	-0.86072	-1.0979	-1.2124	-0.663	-0.957975
YGL202W	-0.99512	-1.00215	-0.78997	-0.85346	-0.64373	-0.9736	-0.48204	-0.406945	-0.596695	-0.520105	-0.30737	-0.632965	-0.148795	-0.224585	-0.183415	-0.027345	0.06777	0.10521	-0.70217	-1.10426	-0.59293	-0.433215	-0.48736	-0.703765	-0.29842	-1.06446	-0.27354	-1.00584	-0.842995	-0.600055	-1.47287	-0.898855	-0.74189	-1.28055	-0.71893	-0.79352	-0.48541	-1.09488	-0.43548	-0.577305	-0.604835	-0.26752	-0.50276	-0.43201	-1.08805	-0.807895	-0.65835	-0.94758	-0.840915
YBL036C	-0.23198	-0.41586	-0.13138	-0.37167	-0.21171	-0.35677	-0.56502	-0.434345	-0.644185	-0.553335	-0.33419	-0.653825	-0.161635	-0.328475	-0.366685	-0.563705	-0.20217	-0.28131	-0.63184	-0.55308	-0.36302	-0.694635	-0.60318	-0.698275	-0.74947	-0.609725	-0.64489	-0.226355	-0.272315	-0.410355	-0.068495	-0.461345	-0.35382	-0.4503	-0.26293	-0.59664	-0.53622	-0.206255	-0.15267	-0.427255	-0.495845	-1.58793	-0.67505	-0.62171	-0.19776	-0.479585	-0.34055	-0.90936	-0.359125
YIL176C	1.31555	1.5118	1.55817	1.28245	1.10424	1.32224	1.06827	0.372255	1.00128	1.43304	0.73914	0.884495	0.837325	0.772475	0.824655	0.943545	0.6803	0.76559	1.08498	1.16918	0.24829	0.466945	1.19239	0.406705	1.16433	0.972065	1.54856	1.67152	1.33763	1.05852	0.731485	0.758505	0.30308	0.88457	1.34822	1.39603	1.01403	1.00933	0.75368	0.604215	0.873745	1.19714	1.11869	1.16323	0.90302	1.71155	0.964	1.21938	1.17956
YPR178W	0.12538	-0.07234	-0.02077	-0.10085	0.19851	0.17163	-0.20442	0.104475	-0.170225	0.288805	-0.10818	0.049795	-0.039855	-0.007285	0.100075	0.147265	-0.19838	-0.01213	-0.21323	-0.23877	-0.26172	-0.210525	-0.3039	-0.057285	-0.24584	-0.396725	-0.25821	-0.243985	-0.375095	-0.152475	-0.049015	0.097285	-0.54527	-0.41218	0.0435	0.15069	-0.52587	-0.326955	-0.25481	-0.032995	-0.272645	-0.41207	-0.10289	-0.18609	-0.19126	-0.146685	-0.21498	-0.43241	-0.283065
YOL147C	-1.60193	-1.2527	-1.19616	-1.36975	-0.94315	-1.43561	-0.59699	-1.38479	-1.08255	-1.32255	-0.89506	-1.08702	-1.8553	-1.87739	-1.67616	-1.08593	-1.25246	-1.39991	-1.87985	-2.44392	-0.89319	-0.362505	-0.61754	-1.46046	-0.90364	-1.33489	0.24777	-0.436455	-1.70545	-0.825315	-1.84966	-1.41719	-1.4931	-1.37215	-1.62579	-1.81698	-0.90302	-1.25666	-0.95464	-1.28893	-0.601165	0.25099	-0.88484	-0.33634	-1.62777	-1.49951	-1.52656	-1.5829	-1.32303
YFR007W	0.19329	0.23543	0.43329	0.38557	0.46536	0.43001	0.89688	0.632365	0.460815	0.517315	0.6652	0.624085	0.015515	0.362095	0.489955	0.294645	0.3747	0.27302	0.70925	0.23488	0.48736	0.459635	0.55162	0.585195	0.5556	0.627275	0.6089	0.415155	0.403355	0.360405	0.459505	0.860885	0.15911	0.48339	0.5039	0.59694	0.89056	0.398425	0.35034	0.387375	0.652875	0.74975	0.63511	-0.02228	0.55852	0.524245	0.52598	0.40746	0.397945
YEL008W	-0.409	-0.64476	-0.55816	-0.58888	-0.75961	-0.56411	-0.41039	-0.062615	-0.531885	-0.113175	-0.06845	-0.278475	-0.020245	-0.063315	-0.107545	1.45486	0.12598	-0.14887	-0.11122	0.07907	-0.22557	-0.342165	0.43673	0.354805	0.07739	-0.283805	-0.05152	-0.230615	0.251625	-0.019855	-0.496345	-0.216395	0.74041	-0.05571	0.27001	0.09717	0.01694	-0.374305	0.29916	-0.052425	-0.182035	0.30464	-0.55587	-0.43551	-0.15487	0.064435	0.09269	-0.24383	-0.009865
YGR072W	-0.71888	-0.34695	-1.0541	-0.70618	-0.69924	-0.51822	-1.17134	-1.64054	-0.749465	-0.856895	-0.55784	-1.21521	-0.326785	-0.544915	-0.889725	-0.783795	-1.15437	-0.77319	-1.32113	-0.68437	0.22994	-0.700965	-0.46234	-0.225165	-0.67945	-0.358145	-0.78104	-0.511395	-0.572715	-0.675505	0.747085	-0.934305	-0.45242	-0.47032	-0.79915	-0.52797	-1.09009	-0.680555	-1.06096	-0.388945	-1.19412	-1.30981	-1.04644	-0.8939	-0.68714	-0.520895	-1.10924	-1.09265	-0.467425
YNL069C	-2.75355	-2.73871	-2.53805	-2.84354	-2.47766	-3.0259	-0.94769	-1.37715	-1.45616	-1.23009	-1.2267	-1.09495	-0.970985	-1.01106	-1.06149	-0.712935	-0.55492	-1.06541	-2.09297	-2.87634	-2.38098	-2.08832	-1.80036	-1.18572	-0.94376	-2.45437	-1.84023	-2.70304	-2.24838	-1.81364	-1.61279	-1.62119	-1.61542	-1.82945	-2.33277	-2.35783	-1.34258	-1.70703	-1.78016	-1.23357	-1.67826	-1.48733	-2.088	-1.44658	-2.48186	-2.39892	-1.12929	-2.2791	-2.21948
YER022W	0.14671	0.14379	0.33569	0.25527	-0.15689	0.40454	-0.22976	-0.097255	-0.092835	0.000985	-0.02601	-0.103075	0.122555	-0.013965	-0.007175	-0.135875	-0.68437	-0.29124	-0.37973	0.21105	0.23902	0.064975	-0.01775	0.304155	-0.28033	0.183145	-0.59242	-0.335665	0.027525	-0.201595	0.666215	0.086315	-0.1685	-0.01265	-0.53201	0.12098	-0.52695	0.242725	-0.37498	0.293155	-0.179425	-0.77975	-0.32849	-0.33023	-0.05655	-0.146025	-0.4675	0.00394	-0.374105
YIL118W	-0.49715	-0.08441	-0.20889	-0.35061	-0.52043	-0.23624	-0.56676	-0.520495	-0.332115	-0.650515	-0.36945	-0.468895	-0.134235	-0.227945	-0.344225	-0.219715	-0.24704	-0.43551	-0.16129	-0.4855	-0.64625	-0.458625	-0.32727	-0.378795	-0.55907	-0.626035	-0.87398	-0.338675	-0.422865	-0.431775	-0.695125	-0.397415	-0.40372	-0.34291	-0.37983	-0.22409	-0.52287	-0.586445	-0.30943	-0.354475	-0.364885	-0.48135	-0.42684	-0.31071	-0.70078	-0.556895	-0.80743	-0.75007	-0.690275
YJR008W	2.5379	2.4376	2.61334	2.3888	2.70046	2.94625	2.55295	2.36363	2.03326	3.04001	2.23573	2.62891	1.5901	1.83764	1.88272	1.74354	1.63649	1.84882	2.54026	2.26462	2.40517	2.4011	2.68819	2.40813	2.27212	2.21048	2.98888	3.26451	2.06898	1.43983	3.04752	2.82305	2.3125	2.30427	2.15938	1.61659	1.96205	2.08695	2.0821	2.19268	2.27133	1.88804	1.61047	1.56794	2.36412	1.37045	2.8322	2.78714	2.92247
YKL217W	0.6775	1.4205	0.71742	1.14702	1.23151	1.02839	3.45342	2.96821	2.52745	3.57049	3.21248	3.51231	0.770375	0.987125	1.1221	1.61733	1.18621	1.25214	1.28473	0.92105	2.06882	2.51521	2.05276	1.31127	2.16338	2.08465	2.87571	2.00849	0.821895	1.65854	2.15253	2.64253	2.14074	0.86398	1.55233	1.37034	2.57817	1.86702	2.36239	1.67656	2.0026	2.88398	1.83104	1.92554	1.88048	1.77771	1.73732	2.31885	1.32618
YAR060C	-0.11789	-0.13439	0.1001	-0.05746	-0.19007	0.26292	-1.15655	-0.237335	-0.457965	-0.251625	-1.14626	-0.715745	-0.324815	0.319745	-0.667805	0.475785	-0.53865	0.05151	-0.38534	-0.29718	-0.21791	-0.036525	-0.7131	-0.271715	-0.3646	-0.374175	0.12454	-0.160365	-0.281775	-0.261385	-0.932295	-0.225055	0.16578	1.74249	-0.6249	-0.13998	-0.243	-0.322755	-0.47937	-0.530075	-0.020835	0.19292	-0.18311	0.35276	-0.86115	-0.189925	-0.92492	-0.6717	-0.544875
YCL010C	-0.03837	0.13154	0.15575	0.22385	0.15198	0.03099	-0.49133	-0.171765	-0.211175	-0.741045	-0.40867	-0.309965	0.067815	0.240305	0.081485	0.425225	-0.02455	0.06464	-0.36731	0.25973	-0.50408	-0.447975	-0.14286	-0.132915	-0.33269	-0.035685	-0.37663	-0.125855	0.068655	-0.161165	-0.526565	-0.270075	-0.2635	0.33975	0.37307	0.09393	-0.78829	-0.183665	0.13159	-0.188595	-0.470125	-0.19182	-0.18024	0.02735	-0.4562	-0.179515	-0.50643	-0.42962	-0.394005
YPL036W	-0.55868	-0.0232	-0.13676	-0.1077	-0.19556	-0.33789	-0.07781	0.147525	0.095685	-0.303865	-0.07954	-0.159105	-0.979665	-0.618295	-1.04286	-0.434405	-0.86573	-0.6974	-0.33542	-0.32353	-0.2637	0.033095	0.21829	-0.712835	0.64815	0.481115	0.5295	0.105035	0.206795	0.208505	-0.756755	-0.218025	0.13316	0.19564	0.45936	-0.25655	0.53179	0.412545	0.09486	-0.456825	0.117935	1.19555	0.36898	0.57561	-0.1445	0.287645	0.27349	0.75978	0.426835
YNL303W	-0.09081	0.93863	-0.36165	-0.24101	-0.45368	0.34578	0.56058	-0.102945	0.038975	0.447315	0.08444	0.817175	0.863895	0.217695	0.200725	0.543835	-0.02807	0.53703	0.78245	0.35534	1.00827	0.909695	0.54514	0.551865	-0.13893	0.261115	0.23339	0.342695	0.706665	0.554845	0.913645	0.116505	1.52312	-0.56391	-0.19617	0.96043	0.29331	0.543205	-0.14873	1.09465	0.228355	0.6642	0.5909	0.44135	0.45045	1.25297	0.28145	0.89869	-0.091515
YJR024C	-0.61158	-0.72811	-0.57318	-0.45361	-0.53771	-0.7287	-0.86288	-0.685455	-0.790975	-1.08387	-0.90711	-0.791225	-1.07075	-0.929385	-0.869875	-0.759445	-0.6858	-0.65163	-0.84174	-1.46582	-1.07769	-0.991285	-0.67552	-1.32791	-0.45822	-0.816515	-0.46722	-0.616645	-0.780665	-0.378685	-1.33801	-0.673765	-1.13907	-0.74901	-0.60222	-0.82909	-0.75074	-1.38035	-0.92968	-1.27418	-0.421205	-0.45722	-0.51578	-0.89312	-0.80193	-0.732195	-0.58968	-0.80661	-0.833925
YFR011C	-0.12949	0.02528	-0.15906	0.05287	-0.41217	0.05915	-0.17647	0.070025	0.211805	0.434335	0.57927	0.034655	-0.054385	-0.303015	-0.164715	0.066645	-0.31658	-0.30427	-0.17845	0.27985	0.17657	-0.500135	-0.07962	0.227155	-0.00202	0.195265	-0.82776	-0.188815	0.206305	-0.147665	1.41926	0.092505	-0.10749	0.20099	0.40508	0.34701	-0.57537	0.014405	-0.2989	0.571205	0.202965	-1.13884	-0.08039	-0.48401	-0.08009	-0.139185	-0.10077	-0.79605	-0.323445
YAL047C	-0.05363	-0.01587	-0.00099	0.18797	-0.38735	0.40731	-0.38455	-0.120535	-0.103655	0.076145	-0.25658	-0.146735	-0.289645	0.201335	-0.184485	-0.081755	-0.48893	-0.19678	-0.23008	0.15463	0.21831	-0.026285	-0.19238	0.108065	-0.48341	0.233055	-0.28711	-0.140845	-0.189475	-0.073165	0.519005	-0.101555	-0.41789	0.8206	-0.09993	0.15473	-0.59675	0.086805	-0.39768	0.067475	-0.157725	-0.58474	-0.282	0.02802	-0.07392	-0.008165	-0.47297	-0.23941	-0.240175
YER056C-A	-1.96749	-1.85425	-1.63813	-1.9587	-1.65628	-2.17582	-1.04338	-1.98195	-0.792655	-0.972535	-0.84139	-0.974925	-0.570835	-0.885295	-0.749915	-0.503695	-1.05291	-0.61156	-0.98528	-1.60116	-1.67934	-1.41982	-1.16019	-1.05618	-1.23286	-1.47029	-1.89493	-1.55252	-2.18556	-1.53774	-0.159935	-0.992535	-1.28115	-1.12311	-1.30633	-1.58916	-1.33066	-1.42742	-1.88812	-0.832665	-1.36173	-1.82621	-1.25268	-1.26403	-1.54166	-1.77577	-0.80061	-1.42184	-1.45226
YBR042C	-0.43799	-0.32585	-0.29514	-0.36068	-0.32576	-0.53657	-0.54481	0.065145	-0.098995	-0.336835	-0.08154	-0.166435	-0.690755	-0.411405	-0.425455	-0.066575	-0.34977	-0.18999	-0.52891	-0.9789	-0.68736	-0.723685	-0.37846	-0.949295	-0.35619	-0.566685	-0.16125	-0.459985	-0.452385	-0.201405	-0.553335	-0.309305	-0.42909	-0.22911	-0.44237	-0.85486	-0.53371	-0.420875	-0.34735	-0.775155	-0.366745	-0.13654	-0.46809	-0.0369	-0.49713	-0.492205	-0.37873	-0.0715	-0.307685
YDR256C	-0.65636	-0.59005	-0.46946	-0.43205	-0.73311	-0.37471	0.34387	0.441865	0.255245	0.695975	-0.00475	0.244515	-0.223625	0.322175	0.110455	0.468655	-0.11888	0.48328	-0.10323	0.14329	0.16651	0.651975	0.80974	0.570155	0.55884	0.698425	0.67529	0.410155	-0.040655	0.120445	0.438125	-0.240745	0.04991	1.3502	-0.19862	0.47096	0.78362	0.811805	0.93519	0.763385	0.042995	-0.05597	-0.3735	-0.26827	0.75241	-0.102915	0.29517	1.2027	0.360755
YFL065C	-0.48146	-0.69267	-0.35526	-0.57724	-0.20246	-0.8126	-0.35722	-0.737535	-0.550885	-0.705925	-0.84345	-0.719635	-0.538165	-0.778655	-0.506835	-0.559755	0.03847	-0.46241	-0.52486	-0.93993	-0.73256	-0.966705	-0.51095	-0.492155	-0.59302	-0.970185	-1.02517	-1.19944	-0.470325	-1.07258	-1.10684	-1.40992	-0.32731	-1.00046	-0.59249	-0.88774	-0.41644	-0.851895	-0.05332	-0.333825	-0.661625	-1.03002	-0.74072	-0.65991	-0.92864	-1.2109	-0.89532	-1.39068	-0.744095
YNL287W	-0.03476	0.02723	-0.15111	-0.01699	0.10119	-0.00999	0.32055	0.776945	0.200825	0.387025	0.14352	0.331065	0.509525	0.728875	0.734885	0.551075	0.70913	0.6039	0.28308	0.55931	-0.12468	0.046185	0.04837	0.538845	-0.14489	-0.033855	0.04819	-0.041805	0.021495	-0.077785	0.072195	0.477195	0.18153	0.18866	0.21793	0.43907	0.31818	0.160475	0.04882	0.275835	0.086595	-0.41789	0.00962	-0.18884	-0.10368	-0.021935	-0.23743	-0.19147	-0.191305
YGR103W	-2.7228	-2.48693	-2.25057	-2.11224	-3.14869	-3.26327	-3.08366	-3.96029	-2.72538	-3.40733	-3.35999	-2.70619	-3.38949	-3.72283	-3.27642	-2.74386	-3.63434	-3.74901	-2.89115	-2.5611	-3.7137	-3.10412	-2.44694	-3.26975	-3.1138	-2.25405	-3.09151	-3.02412	-2.09043	-2.49097	-2.22666	-2.84044	-3.21975	-2.41812	-2.37102	-2.48611	-3.09431	-2.82618	-2.58859	-3.42704	-2.59199	-2.35289	-2.63229	-1.94594	-3.37511	-2.73416	-3.07162	-3.37415	-3.07265
YAL065C	1.28877	1.03977	1.14844	1.44453	0.78895	1.09803	-0.12589	0.334435	0.435815	-0.248215	-0.434	-0.593075	0.544235	0.199395	0.307245	0.793695	0.82456	0.68932	0.55263	0.67884	0.18581	0.207315	0.66929	-0.025645	0.80902	0.600925	1.23096	0.885975	1.03541	-0.076645	-0.334305	0.296085	0.80925	0.5863	0.42263	0.5063	0.93764	0.488955	0.38279	0.580735	1.36641	1.03061	0.78371	0.71516	0.31579	-0.008725	-0.11745	0.20419	1.10204
YLR061W	-2.62682	-2.40985	-2.64689	-2.30085	-2.43154	-2.33906	-1.11316	-2.3541	-1.31341	-1.1723	-1.20297	-1.20239	-0.922585	-1.33462	-1.06991	-0.745085	-1.39631	-1.21125	-1.9385	-2.43694	-2.42678	-1.84333	-2.09252	-1.20535	-1.36056	-1.56618	-2.27037	-2.36434	-2.60814	-2.06786	-1.09634	-2.16342	-1.79989	-2.09561	-2.23715	-2.04561	-1.35558	-1.92673	-2.17612	-1.09825	-1.79385	-1.77759	-2.01885	-1.92805	-2.13733	-2.24185	-1.55691	-2.218	-2.04942
YLR171W	0.19725	0.32836	1.2659	0.40883	0.28297	-0.12032	2.03364	1.2878	1.61515	1.13884	1.5892	0.996565	0.853105	-0.591195	1.43931	0.744955	0.92422	0.16513	1.5689	0.31142	1.57843	0.842095	2.08608	0.427855	1.62528	1.54404	2.13045	0.976895	1.60048	1.19684	1.8336	1.2548	2.38354	-0.25165	1.43463	0.85988	1.563	0.580815	1.68366	0.747175	1.39916	1.39655	2.0089	0.55986	1.11145	0.636755	1.62329	0.46029	1.07693
YOR281C	-0.78254	-0.29705	-0.83212	-0.6363	-0.99437	-0.60723	-1.10435	-0.971475	-0.603405	-0.616125	-0.4953	-0.832635	-0.302595	-0.524195	-0.909875	-0.859045	-0.94631	-0.82013	-1.38962	-1.03793	-0.10664	-0.819925	-0.58519	-0.230895	-0.5697	-0.459605	-0.99634	-0.471745	-0.591295	-0.482245	0.546775	-0.589595	-0.55552	-0.63704	-0.85219	-0.52788	-1.33198	-0.452055	-1.20427	-0.301195	-0.935925	-1.51673	-0.81958	-0.91331	-0.77987	-0.500315	-0.88205	-1.58598	-1.03439
YJL078C	-0.03483	-0.12125	-0.04654	-0.24621	0.18652	-0.0631	-1.02256	-1.2654	-1.03547	-1.09316	-0.74444	-1.36499	-0.555225	-0.852075	-0.759775	-0.496795	-0.62882	-0.6042	-0.75565	-1.62227	-0.92639	-0.884635	0.20263	-0.174925	-0.1312	-0.980225	-0.00992	-0.724665	-1.37732	-0.263475	-0.965295	-1.02056	0.02215	-0.25021	-0.84564	-0.50058	-0.20282	-1.0489	-0.61244	-0.882635	-0.108555	1.04386	-0.00582	0.47587	-0.52521	-0.368165	-0.06512	-0.62873	-0.352205
YBR162C	-0.74539	-0.57851	-0.60961	-0.37486	-0.8519	-1.04543	-1.08664	-1.05638	-0.761745	-1.1344	-0.88069	-0.947935	-0.813745	-0.845425	-0.894375	-0.613965	-0.72827	-0.48253	-1.25722	-1.33874	-1.5278	-1.38855	-0.92441	-1.02246	-0.69325	-0.925195	-1.01045	-1.06421	-0.849235	-0.408935	-1.76404	-1.24239	-1.35278	-1.09511	-1.14401	-1.1538	-1.07697	-1.06588	-0.57012	-1.00404	-0.874705	-0.19405	-0.88544	-0.54755	-1.38449	-0.478965	-1.10622	-1.27329	-1.18351
YMR114C	0.88574	0.57174	0.8805	0.59417	0.7057	0.68451	0.70558	0.686135	0.754195	1.24466	0.96829	0.834175	0.909685	0.787735	0.719125	0.642335	0.49757	1.07998	0.25868	0.79484	1.06417	0.912625	1.09699	0.654835	0.75135	0.864515	0.98467	0.940395	0.449895	0.340645	1.64738	0.739105	1.00363	0.40226	0.50918	0.37969	0.37534	0.525655	0.75464	1.01992	0.763425	0.58936	0.66327	0.66676	0.62948	0.640485	0.27137	0.32189	0.669055
YJL152W	0.42071	-0.18896	0.31372	0.62359	0.53322	0.73078	0.68557	0.517205	0.679885	0.510875	0.59623	0.371215	0.772105	0.889685	0.932335	1.11825	1.27872	0.79436	1.2039	0.50011	1.68582	0.991505	0.99276	0.604905	0.51539	0.677105	1.36683	0.839995	1.05567	0.460405	0.772835	1.26242	1.40786	0.04823	1.1294	0.97454	1.56445	1.19576	0.76283	1.04175	0.236105	0.58714	1.00341	1.11944	0.61517	0.882925	0.9382	1.17145	0.706735
YGR251W	-2.12373	-1.8895	-2.10305	-2.19569	-2.03512	-2.05984	-2.4756	-3.20761	-2.50365	-2.5639	-2.50287	-2.05898	-1.63001	-1.97541	-1.94762	-1.86899	-2.16441	-2.33467	-1.98586	-2.1721	-1.96924	-2.25317	-1.83286	-2.27607	-1.95579	-1.5232	-2.29622	-2.06926	-1.77753	-1.65351	-1.79483	-2.04768	-1.98937	-1.94472	-1.79396	-2.39548	-2.28522	-2.15968	-1.86569	-2.22781	-2.56753	-2.27945	-2.10942	-1.5833	-2.21066	-1.8271	-2.92887	-2.77401	-2.5193
YJL067W	0.32196	1.32845	0.30943	1.08184	0.38148	0.49871	0.36581	1.06341	0.910155	0.767325	0.46196	0.363985	0.017335	0.611485	0.015585	0.439795	0.11302	0.71969	0.7649	0.26996	1.06834	0.598025	0.87863	0.262505	0.77263	1.2449	1.35182	1.32581	1.36627	0.857245	1.35529	0.792225	0.85318	0.45918	1.00153	0.28266	1.65702	0.813515	0.92107	0.991175	0.162985	1.16338	1.04683	-0.57308	0.46754	0.826925	0.27939	0.37983	0.508645
YBR094W	-0.14831	-0.1438	-0.25153	-0.17057	-0.15563	-0.21304	0.09513	0.326955	-0.244265	-0.150065	-0.09859	0.208845	-0.139735	-0.212545	-0.129465	0.121795	-0.05772	0.10338	0.15763	0.15644	-0.37092	0.182465	-0.31577	-0.410385	-0.29596	-0.107515	-0.26573	-0.439295	-0.245265	-0.439825	-0.150595	0.069185	-0.1005	0.33701	-0.26753	-0.16299	0.07367	0.090895	-0.44702	-0.602885	-0.184855	-0.0114	-0.47279	-0.22493	-0.31927	-0.337355	-0.20779	0.12606	-0.213235
YDR118W-A	0.49835	-0.10961	0.22326	0.31063	0.13851	0.35175	0.5767	0.124605	0.136735	0.748455	0.43313	0.570285	0.441095	-0.006075	0.534985	-0.523635	-0.15147	-0.38915	0.61881	0.45872	0.12513	0.553735	0.21974	0.766425	0.20778	0.464625	0.01361	0.179525	-0.081925	0.220625	0.366055	0.575105	0.32706	0.8939	0.26185	0.5926	0.25976	0.285795	0.3626	0.300595	0.178575	0.08411	0.41261	0.39174	0.57021	0.429975	-0.08202	0.0805	0.513115
YGR065C	-1.17739	-0.80325	-0.97953	-0.98294	-0.61536	-0.6989	-1.79729	-2.10293	-1.85665	-2.04637	-1.7954	-1.7806	-1.10783	-0.952325	-0.900435	-1.07346	-1.0522	-0.90816	-1.34801	-2.02761	-1.81851	-1.97236	-0.99596	-0.693445	-1.69129	-2.14568	-1.79854	-2.14474	-1.61326	-0.986325	-2.58868	-1.70351	-1.13523	-1.44331	-1.31278	-1.41813	-1.14116	-1.49479	-1.41196	-1.23789	-1.89979	-0.99453	-2.23677	-1.77871	-1.55854	-1.05536	-0.83423	-1.12066	-1.20751
YGR031C-A	0.01341	0.81804	0.08163	0.48295	-0.01504	0.21319	0.13828	0.640815	0.821415	0.849515	0.39466	0.357125	0.469395	0.387005	0.522235	0.856175	0.4947	0.00107	0.59903	0.01163	0.22359	0.493545	0.65305	-0.149165	1.16243	0.584745	0.88441	0.654005	0.481115	0.694965	0.527495	0.731905	1.0671	1.19551	0.36073	0.20527	0.40026	-0.220695	0.83972	0.213395	0.538065	0.31879	0.62359	0.8825	0.22713	0.794805	0.21726	0.87919	1.05862
YGL251C	-0.33173	0.12499	-0.3067	-0.41788	-0.35806	0.0904	-0.64481	-0.288135	-0.825585	-0.264595	-0.69884	-0.600785	-0.104525	-0.142945	-0.220515	-0.458705	-0.27126	-0.33783	-0.35718	0.05862	-0.06096	0.216815	-0.62819	0.111135	-0.5834	0.260005	-0.66146	0.129815	-0.351175	-0.340745	0.009335	0.144535	-0.28397	0.09805	-0.43656	0.1945	-0.33847	-0.004235	-0.03589	-0.036565	-0.168145	-0.42548	-0.61994	0.18397	-0.37266	-0.292825	0.07488	0.0175	-0.314845
YOR260W	-0.76445	-1.02572	-1.06481	-1.08325	-0.93779	-0.83035	-0.96594	-1.16861	-1.27208	-1.2503	-1.24351	-1.09306	-0.396055	-0.559925	-0.485675	-0.442005	-0.59559	-0.5915	-0.73634	-1.13685	-1.4983	-1.24848	-1.24465	-0.688655	-0.97893	-1.24655	-1.37208	-1.64522	-1.24771	-1.34316	-1.41231	-0.938915	-0.96106	-0.9754	-1.35098	-0.81465	-0.72573	-1.12765	-1.03383	-0.884195	-0.941145	-1.06618	-1.09217	-1.19773	-1.30117	-1.39349	-1.17339	-1.40844	-1.279
YEL017C-A	-1.06328	-0.3905	-0.83743	-0.43667	-0.16768	-0.62723	-0.89798	-1.14813	-0.747865	-1.09472	-0.98934	-0.534975	-0.628605	-0.605315	-0.662435	-0.310485	-0.60685	-0.37124	-0.79293	-1.06844	-1.16582	-0.646775	-0.4441	-1.19861	-0.12902	-0.450855	-0.89504	-0.289275	-0.603265	-0.532685	-0.615055	-0.933485	-0.72028	-0.6951	-0.75293	-1.12978	-0.59803	-0.879545	-0.06814	-0.904985	-0.866335	0.18463	-0.2151	-0.24527	-1.35535	-0.809545	-0.70646	-1.0275	-0.819485
YKL021C	-1.60073	-1.54987	-1.82105	-1.80413	-1.91565	-2.06664	-1.75846	-2.38388	-1.86597	-2.22872	-1.96574	-1.82251	-1.68005	-2.15863	-1.69163	-1.50564	-2.00766	-2.18677	-1.70925	-2.22323	-1.67704	-1.76575	-1.57921	-1.75686	-1.80063	-1.73649	-1.73379	-1.42488	-1.63328	-1.43613	-1.64973	-1.96416	-1.89698	-1.80791	-1.86686	-1.94838	-1.73766	-1.89745	-1.9519	-1.74794	-1.82414	-2.22447	-1.65242	-1.33364	-1.79155	-1.99765	-2.15161	-2.28059	-1.9483
YKR028W	-0.38434	-0.24259	-0.41014	-0.36777	-0.37792	-0.38978	-0.70971	-0.292905	-0.413135	-0.567515	-0.65847	-0.328545	-0.155295	0.151335	-0.101815	-0.046015	-0.00425	-0.17159	-0.43062	-0.2892	-0.52928	-0.311455	-0.5107	-0.177195	-0.4784	-0.405115	-0.59721	-0.636915	-0.719085	-0.516845	-1.14847	-0.495595	-0.20734	-0.2993	-0.63052	-0.61835	-0.52768	0.036455	-0.26897	-0.407855	-0.773355	-0.60995	-0.72628	-0.17491	-0.67988	-0.430265	-0.41187	-0.6186	-0.440665
YOR374W	3.34167	3.55668	3.44512	3.19553	3.67777	3.21565	5.33058	5.4231	4.40991	4.93532	4.92426	5.56489	3.24117	3.31146	3.8819	3.58712	4.26342	4.43654	4.65076	4.4378	5.16371	4.3198	2.48541	2.59971	4.15395	3.60636	4.60632	3.89351	3.10713	3.51261	4.00716	3.73978	4.03505	2.65001	4.29693	4.07606	3.4191	2.61977	3.87294	2.93918	3.27473	4.20029	4.5482	3.47074	3.18682	3.39398	3.06323	3.0215	3.71849
YNR062C	-0.4067	-0.11787	-0.82699	-0.70633	-0.62739	-0.77776	-0.5697	-0.573815	-0.373355	-0.430425	-0.4216	-0.464675	-0.573555	-0.809405	-0.533545	-0.252705	-0.34336	-0.72173	-0.45194	-0.28561	-0.86019	-0.623275	-0.33461	-0.776475	0.27166	-0.047845	0.2482	-0.208145	0.021725	-0.074185	0.330045	0.045855	0.08356	-0.8939	0.2674	-0.21539	-0.3098	-0.775315	-0.44216	-0.529475	0.150785	-0.23391	0.03253	-0.85261	0.06867	-0.248415	-0.04997	-0.04974	-0.014625
YHL026C	-1.4411	-1.12468	-1.03096	-1.13269	-1.11332	-1.24794	-1.1211	-1.34563	-1.21893	-1.4545	-1.10164	-1.273	-1.54452	-1.26361	-1.13967	-1.00527	-1.25753	-0.98914	-1.5919	-2.20784	-1.48563	-1.06442	-1.37756	-1.33333	-0.92924	-1.58872	-0.9943	-1.6321	-1.61936	-1.37735	-1.91433	-1.29699	-0.97934	-0.75778	-1.05276	-1.20832	-0.94468	-1.26331	-1.36332	-1.6808	-1.32841	-0.30109	-1.3867	-0.96147	-1.73716	-1.37478	-1.36242	-1.48146	-0.981885
YHR014W	0.53676	0.90008	0.45367	0.45036	0.58966	0.92794	0.48076	0.623475	-0.006235	0.704005	0.32783	0.594175	0.979135	1.08428	0.825355	1.30042	0.53498	0.68274	0.55587	0.89189	1.27254	1.08244	0.73685	1.36915	0.7517	0.898215	0.70136	1.08848	0.307475	0.253195	0.911065	1.58083	1.40696	1.18523	0.83541	1.0494	1.07468	0.762325	0.4664	1.27506	0.595585	0.97081	0.29982	0.69731	0.86699	0.481125	0.65636	0.97106	1.04748
YJL102W	1.32635	1.10242	1.21909	1.39473	1.27254	1.55148	1.3972	1.64958	1.47619	1.50187	1.48294	1.41143	1.00104	1.16914	0.919415	0.908245	1.01685	1.23605	1.03621	1.55704	0.7371	0.970035	0.80647	1.40434	0.94517	1.48741	0.1609	0.039785	0.804245	0.885325	0.251195	0.706715	0.96225	1.67547	1.01588	1.57982	0.77159	1.38321	1.33036	1.77307	0.610395	0.64393	0.72183	0.7896	0.73917	1.31841	0.87398	0.86761	0.530945
YDL015C	-0.27868	-0.27738	-0.24725	-0.078	-0.03292	-0.27858	0.10751	0.360995	0.096685	-0.253945	-0.08518	-0.073495	-0.202365	-0.140795	-0.098275	-0.095825	-0.05669	0.01127	-0.49113	-0.63709	-0.349	-0.103365	0.02202	-0.342235	0.41729	0.023125	0.13761	-0.004555	-0.566365	0.016405	-0.675905	-0.343075	-0.12991	-0.37472	-0.54705	-0.28124	-0.28549	0.066095	-0.02753	-0.376545	0.028755	0.45093	-0.05906	0.05779	-0.36134	-0.251775	0.06996	-0.06884	-0.219685
YCR028C	-1.04799	-0.77073	-0.77227	-0.85591	-0.63046	-1.0748	-0.74047	-0.585595	-0.766975	-1.02595	-0.84352	-0.899585	-1.18569	-1.22321	-0.817865	-0.792985	-0.91776	-0.83282	-1.13887	-1.40021	-1.37308	-0.887135	-0.71421	-1.18064	-0.494	-0.960735	-0.46428	-0.686675	-1.00517	-0.699395	-1.6563	-0.911305	-0.91042	-0.6823	-0.89263	-1.36399	-0.8015	-0.742845	-0.49555	-1.46679	-0.826185	-0.07708	-0.67386	-0.42385	-1.15301	-1.18881	-0.94649	-0.95608	-1.09696
YCR016W	-2.61357	-2.05836	-2.37539	-2.3235	-2.81461	-2.59039	-3.00382	-3.53654	-2.40943	-2.4899	-2.1201	-2.45973	-1.95781	-2.52	-2.36402	-2.07686	-2.64263	-2.73596	-2.95235	-2.75883	-1.85893	-2.73393	-2.14352	-2.42082	-2.68925	-2.13143	-2.80608	-2.28715	-1.80035	-2.055	-0.959735	-2.19836	-2.07103	-2.70709	-2.43661	-2.49633	-2.71817	-2.4023	-2.48544	-2.37326	-2.56517	-2.60042	-2.31141	-1.77306	-2.65223	-2.56824	-3.2462	-3.45989	-2.28288
YER058W	0.56981	0.58026	0.68825	0.88764	0.97511	0.45173	1.09754	-0.010295	0.808355	0.887045	1.46684	0.622205	0.690585	0.303665	0.511125	0.212355	0.49362	0.4738	0.19033	0.44398	1.51932	0.558985	0.94169	1.25944	0.95061	0.925495	0.53001	0.876165	0.814855	0.432615	2.55884	0.543425	0.37869	0.45899	1.25885	0.87019	0.22152	0.539255	0.61558	1.43762	0.787845	0.49808	0.98515	0.43266	0.83381	0.897375	0.8915	-0.2652	0.487035
YER149C	-0.0374	0.11769	-0.12521	-0.10498	-0.2988	-9e-05	-0.87761	-0.943465	-0.422415	-0.587515	-0.70112	-0.770255	-0.603295	-0.566305	-0.719615	-0.746955	-0.76574	-0.98532	-0.37252	-0.00224	-0.86568	-0.485215	-0.59966	-0.883015	-1.05893	-0.214055	-0.79058	0.091795	0.106795	-0.130195	-0.353955	-0.657025	-0.55686	-0.763	-0.09027	-0.32961	-0.90637	-0.401295	-0.66252	-0.652615	-0.913605	-0.99155	-0.54255	-0.21516	-0.42971	-0.249575	-1.02832	-0.87728	-0.638875
YJL147C	-0.184	-0.42149	0.00906	-0.15905	-0.39523	0.17014	-0.2347	0.205595	-0.302435	-0.242425	-0.47585	-0.014895	-0.070025	0.207115	-0.250715	-0.441935	-0.66048	-0.50683	0.05572	-0.00999	-0.39131	-0.080915	-0.43124	0.116415	-0.3934	-0.354635	-0.8324	0.137235	-0.213635	-0.218595	-0.545805	0.042265	-0.20657	-0.57974	-0.18515	0.25077	-0.18769	-0.030905	-0.33654	0.424735	-0.239545	-0.1571	-0.07915	-0.2298	-0.25637	-0.086175	-0.43517	-0.19408	-0.179485
YDL035C	0.66406	1.21151	0.94899	1.06075	0.79439	1.15446	0.8921	1.42606	1.26086	1.25292	0.95075	1.25543	0.472105	0.779895	0.636165	0.563885	0.78179	0.9066	0.35656	0.84075	1.0025	1.297	0.76778	0.847005	0.68971	0.750755	0.91619	0.972465	0.488185	1.07814	0.948555	0.664345	0.94204	0.62768	0.40364	0.77808	0.7917	1.27825	0.92502	0.610835	1.02838	1.06813	0.30358	1.02225	0.69697	1.30276	1.04876	1.04025	0.938565
YDR533C	2.51511	2.52142	2.84715	2.62961	3.0741	2.66978	4.27859	4.13729	3.70711	4.20554	3.86179	4.3282	2.21564	2.53396	2.53453	2.67042	2.54733	3.11885	2.72266	2.42592	3.74888	3.68434	3.34334	3.1361	4.00339	3.82849	3.71079	3.06113	2.52495	1.87078	3.1879	2.95362	3.29038	3.04697	2.48046	2.33137	3.3879	3.10052	2.64685	2.49309	3.22548	3.34352	2.71673	1.90722	3.74361	2.0581	3.35418	5.02574	2.95724
YGL222C	0.58482	0.61365	0.41472	0.39346	0.96651	0.58313	0.30911	1.24131	0.807245	-0.126825	0.21816	0.844885	0.693295	0.774325	0.798475	0.369715	1.65637	1.10406	-0.11964	-0.26361	0.09105	0.105765	0.62358	0.332825	0.19193	0.889485	1.42538	0.698525	0.912455	1.06864	0.817815	0.745965	0.21485	-0.07797	0.35847	0.50385	0.88002	0.451485	0.56736	-0.424825	0.954005	1.19179	0.88089	0.2003	1.09131	0.988935	1.38759	1.09965	1.14552
YDL090C	0.02043	0.03122	-0.06113	0.2412	0.44107	0.28472	0.22067	0.413915	-0.110735	0.239055	-0.07811	0.228565	0.152915	-0.056345	-0.159375	-0.015815	0.12509	0.01965	0.70396	0.35617	-0.1647	0.144845	0.16553	-0.132295	0.08157	0.086235	0.16654	0.176205	-0.058675	0.218595	-0.117415	0.591035	-0.32843	-0.21164	0.11788	0.23338	0.10563	-0.189245	0.05252	0.062245	-0.016465	0.15723	0.13754	-0.04103	-0.0116	-0.017815	0.26192	0.35014	0.037465
YBR177C	1.56352	1.13038	1.56973	1.38644	1.79107	1.30103	2.29945	2.33054	1.84215	1.98208	2.00859	2.24869	1.12584	1.16048	1.21327	0.788975	1.2145	1.29737	1.77117	1.34117	1.17712	1.12698	1.53998	1.04685	1.68173	1.39481	2.0006	1.16088	2.23454	1.18189	1.21324	1.03744	2.42819	1.6067	1.61764	1.08132	1.96968	1.68928	1.46431	1.25582	2.18617	1.93496	1.87582	0.84476	1.46113	1.25462	2.35535	2.05648	1.46879
YJL034W	2.34364	2.22239	2.59355	2.85952	2.46816	2.14196	2.27945	2.25556	2.25918	2.25109	2.33298	2.25727	2.38788	2.49182	2.55014	2.14968	2.50694	2.29304	2.18883	2.59983	1.81754	1.59251	1.45891	1.69886	1.7206	1.63702	2.76861	2.92988	1.91172	2.94908	2.84861	2.49243	1.80825	1.78556	2.18355	1.83498	1.69809	1.41237	1.72677	2.0388	2.36503	2.23826	2.32899	2.24311	2.65959	2.87343	2.01972	2.03658	2.82533
YML012C-A	-0.66513	0.79771	-0.32281	0.19049	-0.16808	-0.09309	-0.68442	-1.25171	-0.452865	-0.811205	-1.07999	-0.221635	-0.150195	-0.519355	-0.676865	-0.161145	-0.38606	1.24353	-0.15868	-0.40025	1.18496	0.663025	-0.26666	-0.431625	-0.23773	-0.453725	0.2374	0.451465	0.848715	-0.471205	-1.10604	-0.791705	0.37313	-0.17734	0.71173	-0.13074	1.0342	-0.353325	-0.38738	-0.402035	-0.619035	-0.21263	0.91808	0.83685	-0.50356	0.075585	-0.6313	-0.23708	0.712435
YNR059W	0.29872	0.25661	0.55979	0.47171	0.75046	0.58874	0.40364	0.205595	-0.004565	0.469685	0.27502	0.313445	0.040155	0.201785	0.070845	-0.111775	-0.01103	0.2056	0.21287	0.24816	-0.23716	0.029165	-0.17379	0.272955	0.0545	-0.359465	0.17454	0.210215	0.201935	1.31296	-0.145945	-0.254335	-0.23147	-0.06397	0.56562	0.24265	0.10154	0.024305	-0.17998	0.018695	0.040905	0.37646	0.22759	-0.10018	-0.04455	0.866415	-0.20955	0.32568	-0.043685
YOR034C-A	0.80259	1.14505	0.39253	0.84332	0.31949	1.1928	0.92394	0.493095	0.698405	1.21944	0.69982	0.622975	0.364515	0.570095	0.624535	1.12333	0.57855	0.39812	1.01389	0.69426	0.53872	0.954885	0.60503	0.510845	0.80545	1.09669	0.69605	0.601625	0.725955	0.708665	0.465325	1.47602	0.3338	0.72874	0.43674	0.80768	0.36125	0.958345	0.29478	1.02029	1.12548	0.94718	0.38297	1.32761	0.99477	1.10337	0.64764	1.08943	0.794955
YGR156W	0.03487	0.01799	0.0217	-0.2414	0.14659	-0.03952	0.13835	-0.279715	-0.131465	-0.106355	0.05157	-0.120755	0.249015	0.243825	0.238105	0.138845	0.15712	0.39354	-0.01106	-0.4365	0.05073	-0.314005	-0.08837	0.193035	-0.22386	-0.373705	-0.09765	-0.395345	-0.219995	-0.667955	-0.368345	-0.521775	0.39959	0.27425	-0.15445	-0.62616	0.17731	0.010565	-0.0799	0.447545	-0.170075	0.11605	-0.13636	-0.43916	-0.1234	-0.681925	-0.14432	0.00159	-0.051445
YLR066W	-0.1097	0.21906	-0.07949	0.14616	0.2342	0.08731	0.05592	-0.286065	-0.066825	0.105145	0.12624	0.054055	-0.083285	-0.025005	0.164335	0.089385	-0.34195	-0.09546	-0.19778	-0.19197	-0.20345	-0.306685	-0.11224	-0.126395	-0.04829	-0.176905	-0.31328	0.146765	-0.403655	0.015015	0.239075	-0.318905	-0.26448	-0.20419	-0.26332	-0.31715	-0.13031	-0.333025	-0.34972	0.097785	0.159275	-0.59015	-0.0251	-0.16122	0.02237	0.059585	-0.18275	-0.1503	-0.188065
YBR125C	0.30329	0.46768	0.67484	0.48256	0.21932	0.19457	0.73693	0.967535	0.589635	0.482425	0.35762	0.691785	0.046645	0.267375	0.391945	0.302375	0.21955	0.46777	-0.03184	-0.18757	0.09064	0.481115	0.3202	-0.059275	0.96162	0.850465	0.54886	0.462725	0.305265	0.023485	-0.041135	0.404105	0.10513	0.24139	0.09502	0.09637	0.79787	0.702555	0.37949	0.028465	0.482505	0.78293	0.29144	0.15973	0.43574	0.484685	0.25379	0.61268	-0.029555
YOR376W	-0.28626	0.30943	-0.04298	-0.29903	-0.32794	-0.16517	0.07701	0.310105	-0.034235	0.138135	-0.2299	-0.250805	-0.146715	-0.250625	-0.265675	0.104325	-0.03961	-0.17127	0.30566	0.42741	0.29845	0.190575	0.8282	0.634475	0.55019	0.607735	0.65432	-0.007495	1.14701	0.765355	0.361735	0.736475	0.45203	0.55579	0.40892	0.52294	0.14107	0.257515	0.25965	0.633825	0.791495	1.08781	0.62499	0.33324	0.3972	0.489365	-0.02405	0.01787	0.705675
YBR173C	0.89705	0.74893	0.74066	0.72999	0.4474	1.00056	1.20225	0.334895	1.04635	1.12058	1.1116	0.943365	1.49456	1.23699	1.45612	1.47184	0.95716	1.37419	0.81642	0.33531	0.29143	0.327615	0.78429	0.715285	0.67406	0.506475	0.42567	0.380815	0.514135	0.705885	1.38336	1.02402	0.68348	0.45817	0.44523	0.62274	0.64285	0.029015	0.50037	0.886045	0.308255	0.68734	0.82238	0.64993	0.73534	0.696585	0.52742	0.53765	0.633935
YCL023C	0.1414	0.01271	-0.04461	-0.47296	-0.03443	-1.04454	0.15173	-0.070165	-0.175795	0.048975	0.07608	-0.348755	0.534835	-0.709685	0.404295	-0.248825	0.0738	0.65607	0.65942	0.28167	0.53672	0.533985	0.33212	-0.103885	0.21818	0.051635	0.4517	0.056405	1.06299	0.422215	0.310955	0.650415	0.5944	0.66559	0.38499	0.09866	1.07774	-0.042135	0.16088	0.157805	0.556795	0.60328	-0.10038	0.57421	0.51688	0.077585	0.82693	-0.21936	0.304605
YHR057C	0.12467	0.12081	0.36569	0.24826	0.39779	0.18942	0.59908	0.676995	0.657815	0.313505	0.59326	0.287565	0.700095	0.439185	0.626925	0.491665	0.71668	0.25032	0.02809	0.02956	0.45325	0.433465	0.45477	0.413475	0.34797	0.127775	0.34428	0.535425	-0.449755	0.153075	0.197885	0.169355	0.0466	0.04264	0.03377	-0.11599	-0.06064	-0.132035	0.26028	0.487955	0.166665	0.22657	-0.13712	0.08562	0.09461	0.127285	0.27625	0.12264	0.146495
YAL051W	0.42751	0.38375	0.65793	0.43042	0.23246	0.48507	0.40107	0.432895	0.256605	0.428435	0.26742	0.271205	0.351215	0.489475	0.521505	0.408805	0.29846	0.39643	0.559	0.46108	0.5838	0.716135	0.38284	0.383785	0.39565	0.445435	0.40093	0.197125	0.627165	0.653085	0.105875	0.153555	0.23507	0.52512	0.14027	0.40952	0.61431	0.625945	0.457	0.290005	0.549965	0.48155	0.6024	0.39468	0.72244	0.598445	0.6271	0.63274	0.674225
YOL162W	0.54597	1.0957	0.65287	0.65327	1.09099	0.69977	-0.48927	-0.547265	0.149955	-0.201385	0.05594	-0.403095	0.523615	0.657425	0.890225	0.835475	0.36779	0.67257	0.63964	0.1125	0.89805	1.10587	0.35537	0.368615	0.37868	0.127905	0.55031	-0.195175	0.454755	0.530585	0.802345	0.160265	0.90219	0.20402	0.94908	1.07333	0.42632	0.538685	0.7019	0.050925	0.705985	0.66236	0.07988	-0.4401	0.49331	0.742535	-0.09409	0.68347	0.699195
YOR077W	-0.04657	0.3327	-0.14497	0.25853	0.31538	0.49069	-0.3268	-0.042835	0.216355	0.315065	0.14225	-0.156595	0.480885	0.646065	0.375635	0.244145	-0.20683	0.22864	-0.71824	-0.02249	0.53207	0.515435	0.22948	0.139955	0.09522	0.441165	0.3621	0.806585	-0.311675	0.342795	0.623115	0.053085	0.00888	0.34465	0.01558	0.51323	-0.56433	0.077805	0.15671	0.361935	0.077645	-0.37173	-0.1045	-0.00804	-0.07173	0.404715	-0.6183	-0.50131	0.221415
YLR234W	-0.83078	-0.66584	-0.84687	-0.67372	-0.74342	-0.80044	-0.64314	-0.565115	-0.381955	-0.480115	-0.72033	-0.579305	-0.878875	-0.754015	-0.917035	-0.653845	-0.8748	-0.47974	-0.69116	-0.71617	-0.67144	-0.607275	-0.93849	-0.352215	-0.81016	-0.567155	-0.39098	-0.723755	-0.982335	-0.617965	-1.3175	-0.448185	-0.52729	0.28383	-0.7318	-0.4	-0.49348	-0.613845	-0.02469	-0.362855	-0.650715	0.24032	-0.56705	-0.56871	-0.59385	-0.434335	-1.02224	-0.37918	-0.384415
YDR198C	-0.71652	-0.46527	-0.77773	-0.69512	-0.54737	-0.49733	-0.89775	-0.764025	-0.853255	-0.890755	-0.93405	-0.706725	-1.15792	-0.710965	-1.08093	-0.731125	-1.30969	-1.01933	-0.77032	-0.89976	-0.92197	-0.550125	-1.132	-0.813155	-0.82015	-0.589555	-0.92997	-0.405265	-0.625055	-0.466955	-1.09875	-0.733395	-0.74929	-1.28643	-0.98447	-0.9242	-0.17175	-0.449825	-1.16123	-1.10526	-0.887075	-0.73293	-1.00917	-0.21189	-0.65043	-0.788885	-1.26055	-0.56485	-0.672935
YJR124C	-1.46359	-1.33918	-1.4605	-1.38487	-1.35799	-1.67655	-1.37319	-1.04333	-1.14665	-1.86787	-1.21678	-1.3019	-1.09336	-1.0491	-1.22025	-0.924045	-0.67246	-1.14438	-1.64079	-2.11325	-1.87773	-1.69226	-1.30391	-1.56811	-0.97409	-1.3518	-1.0198	-1.53024	-1.56031	-1.03141	-1.97725	-1.22908	-1.20009	-1.0921	-1.46438	-1.74893	-1.08205	-1.06039	-1.16718	-1.87251	-1.28554	-0.73333	-1.33681	-1.09021	-1.7265	-1.5197	-1.45427	-1.66351	-1.37586
YHR107C	0.17939	0.05949	0.04445	-0.11683	-0.10691	0.1846	-0.12407	-0.188235	-0.133245	-0.337205	-0.21747	-0.099535	0.104525	-0.063605	0.047845	-0.200665	-0.03885	-0.15397	-0.10986	-0.05328	-0.12556	-0.319785	-0.30425	0.024925	-0.60253	-0.349055	-0.39217	-0.388855	-0.019255	-0.112135	-0.232055	-0.129155	-0.02606	0.06157	0.03073	-0.05864	-0.44485	-0.064335	-0.22553	-0.098905	-0.363845	-0.51712	-0.34	-0.22331	-0.17145	-0.289555	-0.17614	-0.41641	-0.009915
YLL066C	0.00158	-0.19322	0.08984	-0.19193	0.07745	-0.00202	-0.46872	-0.484535	-0.482295	-0.635725	-0.38173	-0.502725	-0.406735	-0.441875	-0.372315	-0.213555	-0.1684	-0.2359	-0.52842	-0.34836	-0.49532	-0.669835	-0.29297	-0.327595	-0.51395	-0.430875	-0.49719	-0.500835	-0.310385	-0.618415	-0.967065	-0.787605	-0.41644	-0.5208	-0.21421	-0.28731	-0.56148	-0.359445	-0.00549	-0.247565	-0.532045	-0.28068	-0.43966	-0.29497	-0.98954	-0.813095	-0.38236	-0.70602	-0.238025
YER112W	-0.5719	-0.23069	-0.61379	-0.46843	-1.233	-0.33662	-0.60703	-0.580205	-0.431695	-0.336095	-0.22594	-0.376995	-0.069835	-0.709775	-0.333495	-0.546765	-0.55455	-1.02963	-0.93112	-0.15921	-0.30511	-0.811625	-0.73827	-0.095195	-0.94189	-0.215825	-1.21064	-0.545085	-0.308515	-0.418255	0.731105	-0.284685	-0.75184	-0.71699	-0.48532	-0.4982	-1.09867	-0.333045	-0.74031	0.268835	-0.649505	-1.50722	-0.70835	-0.97045	-0.39117	-0.528445	-0.95146	-0.96028	-0.891465
YLR174W	0.57924	0.69209	0.41141	0.67101	0.68558	1.28557	1.23039	1.00182	0.929995	1.42958	0.92022	1.17464	0.747565	1.45508	1.07231	1.12708	1.14098	1.24932	0.33777	0.70787	0.67218	0.881735	0.63158	1.10166	0.60875	1.24429	0.15419	0.712235	0.481635	0.264865	0.841295	1.5205	1.19701	1.67056	0.63849	1.17131	0.6018	0.790455	1.19458	1.14536	0.665155	1.01366	0.19281	1.33925	0.4313	0.569485	0.34741	0.91316	0.549165
YCL026C-A	0.49943	1.26762	0.44462	0.83173	0.38539	1.06444	0.14031	0.125665	0.420395	0.234885	0.2833	0.570235	0.704635	0.451185	0.625245	0.921265	0.88075	0.48452	0.87352	0.78223	0.23597	0.654885	0.80954	0.886495	0.80736	0.536005	1.04004	1.33112	0.990805	1.10191	0.010205	-0.162025	0.63637	1.17223	1.11131	1.27406	0.59459	0.397715	0.10167	0.883745	0.323215	0.33767	0.58062	0.63319	0.04181	0.492145	0.40117	0.71736	0.852665
YCR018C-A	1.32369	0.43047	0.98376	0.64205	1.17804	0.27793	1.16364	1.02727	1.03858	0.322345	0.67611	0.406795	0.104375	-0.058465	0.470255	0.316745	0.15366	0.18889	0.52484	-0.36349	0.42455	-0.177335	0.66868	-0.119125	0.66282	-0.092065	1.00126	0.315505	0.401095	0.105045	0.186835	-0.047515	1.15159	0.61561	0.87547	0.38687	0.51138	0.456745	0.79892	-0.084625	0.913905	0.44937	0.79408	0.38497	1.21259	0.165795	1.18667	-0.15329	0.794325
YGR108W	-1.5779	-1.41667	-1.36753	-1.08103	-1.08172	-1.12916	-1.42468	-0.999515	-1.33258	-1.15684	-1.37272	-0.957405	-1.31298	-1.30485	-1.44684	-1.54252	-1.39681	-1.54376	-0.58064	-0.50981	-1.39759	-1.61475	-1.25345	-0.124315	-1.98381	-1.84095	-2.02655	-2.22247	-1.04191	-1.05383	-1.53085	-1.13647	-1.41046	-1.26295	-1.23899	-1.04649	-1.60328	-0.925875	-0.51323	0.115745	-1.49555	-1.74836	-1.74421	-0.67165	-1.4398	-1.11881	-1.58696	-1.79081	-1.68985
YDR346C	-1.17361	-1.24359	-1.17914	-1.10543	-1.14978	-1.281	-1.24444	-1.46884	-1.31363	-1.55174	-1.45851	-1.10753	-1.2779	-1.18257	-1.2248	-0.719795	-1.4074	-1.3394	-1.02012	-0.84271	-1.60964	-1.20739	-1.3678	-1.13157	-1.34768	-1.18145	-1.29544	-1.09526	-1.23202	-1.2634	-0.849725	-1.06732	-1.63945	-1.26743	-1.20795	-0.93088	-1.70051	-1.37908	-1.2803	-1.11462	-1.40589	-1.58414	-1.39808	-1.30113	-1.94572	-1.4409	-1.45218	-0.96453	-1.28215
YDR091C	-1.94911	-1.93773	-1.80427	-1.62725	-1.61376	-1.93135	-1.817	-1.58991	-1.80551	-2.05782	-2.13865	-1.72791	-1.60566	-1.52961	-1.61248	-1.27946	-1.55704	-1.67874	-2.02078	-2.40585	-2.39385	-2.00555	-1.70914	-1.5839	-1.36052	-1.868	-1.71203	-2.17211	-2.14824	-1.43572	-2.37508	-1.95558	-2.13425	-1.37953	-2.23596	-2.13556	-1.52682	-1.53275	-1.82298	-1.77144	-1.79509	-1.54608	-1.58805	-1.61624	-2.2115	-1.94921	-1.68668	-2.25574	-1.98344
YKR092C	-3.28786	-3.05431	-2.86558	-2.89816	-3.03986	-3.39047	-3.0523	-3.97974	-2.85725	-3.35862	-3.19721	-2.77059	-2.82194	-3.47857	-3.04387	-2.46294	-3.07301	-3.33262	-2.93651	-3.7013	-3.15465	-3.28194	-2.80045	-2.4817	-2.8902	-2.7754	-2.92243	-2.95085	-2.89737	-2.532	-2.70397	-3.10921	-3.04458	-2.22231	-2.6716	-3.00204	-2.50836	-3.21029	-2.2604	-2.7896	-2.45445	-2.42158	-2.69935	-2.65471	-3.22909	-3.17394	-3.06675	-4.1122	-3.29516
YLR269C	0.50953	-0.18379	0.94041	-0.55135	1.5223	-0.53462	0.68878	0.239875	0.564905	-0.216555	0.94971	0.314115	1.43972	-0.696675	1.14228	1.3402	1.3935	0.27775	1.06634	0.81704	1.30884	0.080915	1.3888	0.513115	1.33558	0.783945	1.28756	0.336145	0.394865	0.328395	0.483005	0.709435	1.30094	1.28606	2.06395	0.54112	1.03585	0.537475	1.0654	0.224135	0.809065	0.72344	1.34001	1.15968	1.18452	0.497315	1.40964	0.37629	0.746865
YER165C-A	0.10201	-0.0174	-0.03403	-0.47131	0.65588	-0.69398	-0.03235	0.194495	0.510755	-0.014205	-0.04977	0.269865	-0.167825	0.100045	0.019495	-0.421835	0.24816	-0.59148	0.54962	0.08867	0.36102	0.006705	0.57084	-0.056495	0.42944	-0.541865	-0.10738	-0.193075	0.896265	0.117135	0.768435	-0.278355	-0.07747	-0.03195	0.4519	-0.3424	0.89833	-0.157935	0.14553	-0.488135	0.648965	0.19408	0.97865	-0.64856	0.72765	0.388315	0.83083	0.26275	0.350885
YLR117C	0.09978	-0.04097	-0.33398	-0.16917	-0.50444	-0.4397	-0.42156	-0.200115	-0.309545	-0.112095	-0.42975	-0.119025	-0.395135	-0.074735	-0.261285	-0.326595	-0.52093	-0.38787	-0.8293	-0.25547	-0.23871	0.006575	-0.33091	-0.585515	-0.60181	0.110475	-0.77271	0.165915	-0.499705	-0.296025	0.086725	-0.334335	-0.58847	-0.39017	-0.40927	-0.46207	-0.67805	-0.246115	-0.5778	-0.347225	-0.655315	-0.64982	-0.51886	-0.49536	-0.56546	-0.349615	-1.10724	-0.54021	-0.504745
YEL069C	-0.19067	-0.09342	-0.08463	0.22114	-0.00041	-0.02711	0.0196	0.782165	0.040815	0.128215	0.08357	0.348655	0.190925	0.557165	0.358495	1.07113	0.3379	0.44239	0.65182	0.29471	0.76356	0.443975	0.19518	0.343305	0.78812	0.593415	0.59354	0.399035	0.315135	0.218265	0.290295	0.559285	0.58527	0.54261	0.83962	0.36837	0.70368	0.747335	0.53591	0.308835	0.628755	0.59181	0.52739	0.66372	0.35004	0.403665	0.59642	0.29149	0.586395
YLR385C	-0.51944	-0.68243	-0.69813	-0.79597	-0.83175	-1.3767	-0.95539	-1.04892	-1.13346	-1.43769	-1.3298	-1.17535	-1.00657	-0.647565	-0.906175	-0.909275	-0.95158	-0.70352	-0.75017	-0.78316	-1.19444	-1.01409	-0.5567	-0.971675	-0.82513	-1.02744	-1.06998	-0.852355	-0.509545	-0.747865	-1.69281	-1.04415	-0.75125	-0.56484	-0.55685	-0.76207	-1.02581	-1.18043	-0.88684	-1.27341	-0.968175	-0.99839	-0.66814	-0.34569	-1.19337	-1.03754	-1.22713	-1.38551	-0.564145
YBR250W	0.18037	0.72487	0.10098	0.42364	0.02798	0.68682	-0.00227	-0.186095	-0.398775	0.292475	-0.0688	-0.165385	0.224125	0.265445	0.103955	0.698925	-0.01822	0.26893	0.34755	0.62776	0.38329	0.516545	-0.01879	0.462295	-0.2421	0.509155	-0.01107	0.564275	0.622875	0.207745	-0.343245	0.541885	1.37441	0.36279	0.3099	0.52309	0.49029	0.321015	0.096	0.526245	0.160325	0.40028	0.02661	0.60746	0.07445	0.327885	0.07435	0.36375	0.351625
YDR143C	0.27343	0.04028	0.33348	0.13919	0.15822	0.02736	0.28033	-0.123895	-0.277035	0.213415	-0.10626	0.052325	0.278385	0.048785	0.317875	0.215585	0.27273	0.36007	0.05289	-0.23322	-0.06177	0.086345	0.41376	0.231825	0.31619	0.273905	0.32035	-0.492445	-0.210235	-0.364415	-0.020985	0.124765	0.47739	0.06248	-0.05822	-0.34719	0.75558	0.357425	0.34188	0.122965	0.308925	0.70323	0.21251	-0.12246	0.41094	-0.456895	0.20993	0.00776	0.008805
YER185W	0.149	0.68156	0.13531	0.2771	-0.35302	0.58151	0.68619	0.605125	0.790485	0.789595	0.64975	0.384345	0.250805	0.962785	0.160455	1.43598	0.49009	0.79243	0.51307	0.3467	0.48758	-0.074685	0.16602	0.684615	0.75476	0.691045	-0.04139	0.570175	0.394165	0.726655	0.711895	0.796365	0.9877	0.50735	0.30267	0.36762	0.28016	0.012735	0.18976	0.840175	1.0574	0.8231	0.5295	0.03988	0.3571	0.784045	0.32326	1.07785	0.647405
YGL007W	-0.50298	-0.34767	-0.51128	-0.7677	-0.65546	-0.29945	-0.59268	-0.636715	-0.118485	0.190795	-0.41939	-0.181085	0.008995	-0.242395	-0.201855	-0.543015	0.08468	0.41617	1.09128	0.20106	-0.02003	0.257105	0.30223	-0.024085	0.06367	-0.056105	0.31748	0.461715	0.453535	0.162545	0.001135	-0.378345	0.34921	0.24444	0.00473	0.29454	0.8136	0.001285	0.19726	0.291145	0.068125	0.12526	0.10946	-0.45763	-0.5046	-0.364165	-0.12603	-0.01463	0.287835
YAL031C	1.20902	0.94295	1.26127	1.28192	1.26261	1.12299	1.16601	1.34059	0.933965	1.00931	0.67098	1.04611	0.764985	0.898295	0.935265	0.815005	0.94077	0.88733	1.12619	0.85042	0.9077	0.886635	0.84946	0.645855	0.8396	0.969095	1.10595	1.01829	0.997075	0.801635	0.771345	0.889575	0.70478	0.9008	1.04963	0.83205	0.89871	0.912815	0.81076	0.497865	1.06201	0.97361	1.15185	0.84587	1.02893	0.894965	1.09981	1.30195	0.701205
YOL013C	1.5321	1.69984	1.65032	1.90967	1.24609	1.39734	1.76051	2.037	1.5245	1.88285	1.6532	1.93684	1.13956	1.32649	1.47151	1.17607	1.52444	1.45747	1.46607	1.98725	0.62457	1.19622	1.17045	1.17254	1.13924	0.956075	1.66009	1.69179	1.90908	1.7891	1.22046	1.37325	0.90524	0.69565	1.47896	1.68655	1.19974	1.30794	0.93283	1.04235	1.50048	1.51195	1.54012	1.34785	1.35949	1.90907	1.42037	1.757	1.32573
YGR139W	-0.21008	-0.34559	-0.32997	-0.20942	-0.39236	-0.11085	0.83553	-0.420015	0.387515	-0.374415	0.83379	-0.297885	-0.156785	-0.450185	0.920565	0.200405	0.23752	-0.3473	-0.21385	0.31517	-0.86017	0.491775	0.51887	1.21399	0.95273	0.362715	-0.84717	0.895695	0.009565	-0.112695	0.094595	0.805885	0.19162	0.28315	-0.46464	0.63571	0.23382	0.331055	0.20547	0.140815	-0.444125	0.46963	-0.43638	0.49357	0.37391	0.246455	0.67379	0.2514	0.227405
YLR089C	-0.33875	-0.0425	-0.11274	-0.13947	-0.005	-0.27477	0.72857	1.01893	0.796405	0.585595	0.73126	0.801155	-0.043575	0.010075	0.265205	-0.115695	0.2265	0.3455	-0.41096	-0.62046	-0.09184	0.015595	0.23894	-0.003825	0.39618	-0.119785	0.25638	-0.727045	-0.480545	0.080295	-0.527535	-0.123285	0.16883	-0.37723	-0.49401	-0.44096	0.46355	0.329885	0.39362	-0.229965	0.680865	0.77982	0.20109	0.07662	-0.21369	0.123185	0.19696	0.35599	0.117585
YKL155C	0.21645	0.2435	0.2142	0.16067	0.28806	0.21949	0.18935	0.314215	0.331585	0.042555	0.43832	-0.023595	0.634895	0.570635	0.587105	0.459045	0.49088	0.4493	-0.46001	0.10266	0.43609	-0.071825	0.08456	0.753105	-0.0218	0.233825	-0.6795	-0.368305	-0.554525	-0.142795	0.095015	-0.012075	0.05794	0.43735	-0.1942	0.24717	-0.24563	0.068585	0.18943	0.748825	-0.428065	-0.61141	-0.57929	-0.20833	-0.18589	0.194225	-0.15328	-0.42303	-0.316895
YKL222C	-0.03399	-0.14249	-0.13018	-0.22466	0.08603	-0.0236	0.19797	0.326825	-0.090855	0.123345	0.08964	0.299375	-0.316595	0.251315	-0.186485	0.003525	-0.10754	-0.19339	0.08513	-0.20753	-0.01094	0.343525	0.04287	-0.106535	-0.13659	-0.135515	0.07181	-0.116205	-0.309185	-0.499105	-0.284645	0.098105	0.11865	-0.07255	-0.18678	-0.50157	0.38114	0.207405	0.09355	-0.056185	0.014575	0.07232	-0.14257	-0.22861	-0.18109	-0.303705	-0.1389	0.0858	-0.304465
YGR154C	0.40406	0.20971	0.42312	0.27763	0.32351	1.08096	-0.03937	0.480835	-0.242775	0.042055	-0.1729	0.020875	-0.177995	0.119625	-0.105475	-0.296245	-0.08331	0.07424	0.34299	0.53117	-0.2465	0.166945	0.1378	0.358725	0.1335	0.669855	0.36351	0.700575	0.226665	0.262385	0.312795	0.654755	-0.03616	0.86558	0.4903	0.54972	0.33399	0.412405	-0.02563	0.328145	-0.151875	0.06521	-0.04369	0.05304	-0.09752	0.396825	0.29734	0.66304	0.352205
YNL277W	-0.92487	-0.6354	-0.78758	-0.84681	-0.72487	-0.38027	-0.63531	-0.668265	-0.799755	-0.557855	-0.42398	-0.460685	1.06719	1.06082	1.05459	1.60441	1.07273	1.16596	-1.02303	-2.20905	-1.10361	-1.72012	-0.17971	0.758085	-0.55233	-1.49493	-1.67018	-1.98362	-2.05195	0.741955	-1.23426	-1.69112	-1.61995	-1.63422	-1.52898	-1.53027	-0.67737	-1.18558	0.38734	0.696755	-0.588155	-0.25553	-0.63116	-0.35083	-1.37555	1.9002	-0.00013	-0.8462	-0.231675
YOL061W	-1.38704	-1.4067	-1.203	-1.12563	-1.19822	-1.52376	-1.32967	-1.03781	-1.36018	-1.66721	-1.40632	-1.39326	-1.25731	-1.26012	-1.21283	-0.966945	-0.90397	-1.17725	-1.35368	-1.78211	-1.85725	-1.72914	-1.31392	-1.31759	-0.94581	-1.40566	-1.1573	-1.63315	-1.53819	-1.13548	-2.04744	-1.517	-1.4606	-1.39277	-1.50657	-1.58804	-1.08705	-1.47585	-1.04416	-1.45056	-1.32317	-0.87108	-1.27632	-1.11764	-1.6354	-1.63548	-1.30371	-1.62699	-1.40213
YDL014W	-2.85922	-3.12552	-3.41899	-2.67974	-2.70755	-3.14335	-3.10121	-3.69455	-2.93881	-3.22018	-3.3953	-2.94896	-2.77081	-2.99358	-2.90436	-2.16188	-3.07313	-3.0324	-2.8369	-3.64011	-3.45779	-3.10312	-2.78405	-2.55385	-2.3122	-3.12892	-3.17248	-3.55979	-2.86657	-3.02358	-4.08735	-3.69864	-3.28644	-2.8628	-2.87732	-3.17008	-2.97779	-3.55504	-2.32876	-2.33894	-3.22307	-2.59916	-2.94236	-2.95146	-4.30826	-3.78017	-3.35662	-4.40792	-3.37769
YFR013W	-0.05092	-0.19292	-0.12513	-0.17835	0.25161	-0.05244	-0.19815	0.024855	-0.210235	-0.222705	-0.2705	0.025605	-0.038955	0.128605	-0.008025	-0.023855	-0.0456	-0.04369	0.25161	0.18831	-0.21012	-0.056925	-0.38699	-0.172995	-0.39809	-0.123965	-0.51512	-0.536775	-0.094585	-0.134665	-0.069095	-0.232425	-0.14598	-0.53764	0.12798	-0.01198	-0.04699	-0.029425	-0.26826	-0.285165	-0.583385	-0.41839	-0.66467	-0.25969	-0.43211	-0.413305	-0.21101	-0.07883	-0.150835
YCL064C	0.08156	-0.09386	-0.09598	0.00404	-0.02998	0.20573	2.09602	2.20614	1.48246	2.039	1.84926	2.14445	1.55333	1.7794	1.91585	1.84546	2.26199	1.84096	0.04297	-0.3154	-0.47132	-0.177745	0.18466	0.445055	-0.56388	-0.579945	-1.01474	-0.953085	0.166875	-0.220405	0.164705	0.052075	-0.01864	-0.24796	-0.40953	-0.33059	1.68228	1.07543	1.5851	1.48249	3.62984	3.43404	-0.17516	-0.64118	0.77882	-0.312155	0.67184	-0.51411	-0.582775
YDR493W	-0.32055	0.1238	-0.2533	-0.11349	0.66452	-0.02142	0.16409	0.161075	0.101305	0.140765	0.24873	-0.091355	0.152295	-0.222115	-0.162865	-0.056515	-0.00269	0.11234	-0.02581	-0.21858	0.07788	-0.001795	-0.17441	-0.012505	-0.12973	-0.185485	-0.09987	-0.012165	-0.391985	-0.150705	0.260515	0.185305	-0.15463	-0.04406	-0.15657	-0.05311	0.30271	-0.170765	-0.44343	0.074905	-0.085875	-0.1	-0.19923	-0.43982	-0.09444	-0.095375	0.09298	0.15808	-0.395065
YLR345W	2.38021	2.31146	2.25759	2.29335	2.03949	2.53464	3.26511	3.36677	2.91071	3.4442	2.91909	3.49246	2.61212	2.79854	2.90301	2.52519	2.80358	2.96761	2.37743	2.80861	2.57034	2.13516	2.29564	2.52585	2.02981	2.31826	1.80454	2.08256	2.58962	2.08272	2.97477	2.27449	2.33832	2.26299	2.45906	2.52945	1.90315	2.05628	2.37078	2.82009	2.35831	1.98419	2.17957	1.63293	2.67842	2.40397	2.50099	2.18315	2.34125
YGL022W	-0.76994	-0.52902	-0.68075	-0.49399	-0.57277	-0.69891	-0.42789	-0.228935	-0.276195	-0.598355	-0.28472	-0.584575	-0.236835	-0.305395	-0.265205	-0.406395	-0.01242	-0.24137	-0.62852	-0.78613	-0.69835	-0.692225	-0.29224	-0.411465	-0.2617	-0.844895	-0.38083	-0.947125	-0.853665	-0.449165	-1.05899	-0.571805	-0.45418	-0.30582	-0.54731	-0.6445	-0.43403	-0.651455	-0.10971	-0.441525	-0.829305	-0.01297	-0.70983	-0.49626	-0.78754	-0.541675	-0.62361	-0.84794	-0.563395
YLR192C	-0.56285	-0.64859	-0.69658	-0.71014	-0.13421	-0.41726	-0.7862	-1.04672	-1.07868	-0.671835	-0.70049	-0.757755	0.105175	-0.045965	0.098705	-0.342445	0.1412	-0.1604	-0.30766	-0.06204	-0.24237	-0.666685	-0.64949	-0.196575	-1.13481	-0.897955	-1.12517	-1.32869	-0.717005	-0.854755	-0.487855	-0.861165	-0.67349	-0.41035	-0.46647	-0.44209	-0.98558	-0.791385	-0.56437	-0.234585	-0.951445	-1.2824	-0.76282	-0.94825	-0.78597	-0.705265	-0.60994	-0.98885	-0.992635
YOR265W	-0.59186	-0.42206	-0.14772	-0.65987	-0.77349	-0.30588	-0.0761	-0.616575	-0.111325	-0.311375	-0.10308	-0.268625	-0.295975	-0.619945	-0.266265	-0.263075	-0.29403	-0.51261	-0.38077	-0.79737	-0.33024	-0.879365	-0.75756	-0.428495	-0.64934	-0.510745	-0.85123	-0.410085	-0.466105	-0.352095	0.435515	-0.056275	-0.8024	-0.54633	-0.45192	-0.21604	-0.86228	-0.740985	-0.79011	-0.368825	-0.458535	-1.57602	-0.71568	-1.0336	-0.23026	-0.138375	-0.5775	-0.74476	-0.752995
YCL019W	2.56822	2.87054	2.44795	2.52243	2.66253	2.6812	2.93579	3.41669	3.60541	2.98779	2.90508	3.2111	1.04632	0.834165	0.831365	0.747915	0.69871	0.99371	2.23503	3.1112	2.73716	1.76469	1.03569	1.58283	1.41932	1.97067	2.18852	2.48109	1.27063	4.09236	2.35866	2.38389	1.02823	1.10482	2.5197	1.94494	1.04706	1.54967	1.02941	1.34631	2.01161	1.64978	1.46741	3.0344	3.76573	4.44564	3.6216	2.74598	3.59974
YDR031W	1.82209	1.58758	1.52161	1.73378	1.47689	1.59645	1.70843	1.35017	1.915	1.87874	2.32667	1.55987	0.862845	0.484215	1.04222	0.891015	0.83001	1.10571	1.29748	1.61428	1.91324	0.948445	1.43025	1.09391	1.89691	1.6018	1.20343	1.77297	1.57476	1.42878	2.38481	1.7383	1.16713	1.20207	1.76294	1.19169	1.48152	1.32282	1.24393	1.15943	1.36993	0.91906	1.55933	1.3269	1.94666	1.44969	1.48912	1.70664	1.46575
YOR333C	-0.45217	-0.5949	-0.37389	0.02474	-0.46415	-0.05315	0.33711	-0.081775	0.200875	-0.006305	-0.27028	0.003425	0.030985	-0.287255	-0.026805	0.502865	-0.36569	-0.0023	-0.74072	0.21244	0.38965	0.766845	0.47887	0.665685	0.61081	0.461305	-0.46709	0.237255	0.182925	0.494205	-0.221255	0.656005	-0.25167	0.24525	0.13623	0.50941	0.56151	0.491175	0.22957	0.573765	0.734615	0.31406	-0.24306	0.2756	0.15082	0.581565	0.24854	-0.12541	0.055975
YDL190C	0.46569	0.35028	0.57122	0.43715	0.4977	0.24483	0.87792	0.723965	0.625175	0.564195	0.65193	0.761315	0.673525	0.525825	0.759935	0.574115	0.87654	0.80444	0.4943	0.33919	0.36946	0.377665	0.29862	0.153875	0.50874	-0.051095	0.69436	-0.018365	0.178865	-0.032085	0.102435	0.212455	0.39663	0.22353	0.10875	0.06676	0.6107	0.223485	0.47068	0.173485	0.503525	0.30402	0.5128	0.34351	0.47871	0.285635	0.33096	0.27106	0.165315
YKR083C	-0.6955	-0.22364	-0.16389	-0.08707	-0.79152	-0.20195	-0.64877	-0.735265	-0.454885	-0.321225	-0.12609	-0.743795	-0.262845	-0.321645	-0.803445	-0.866845	-1.00321	-0.90635	-1.00406	-0.564	-0.17336	-1.0149	-0.7588	-0.203535	-0.46858	0.350755	-0.59911	0.064445	-0.652685	-0.220745	1.64421	0.211815	-0.51553	0.00406	-0.23695	-0.11959	-1.25767	-0.329645	-0.56601	0.184555	-0.377485	-1.70733	-0.41845	-0.82514	-0.18884	-0.224505	-0.63431	-1.0626	-0.579305
YBR141C	-2.73407	-2.28538	-2.26971	-2.08968	-2.38456	-2.29015	-2.36272	-2.41058	-2.40446	-2.91795	-2.44219	-2.29819	-2.40333	-2.26591	-2.24267	-2.18519	-2.22237	-2.60924	-2.28482	-1.9746	-1.96597	-1.75707	-1.85183	-1.79082	-1.95265	-1.50842	-1.95496	-1.77161	-2.00332	-1.52012	-2.07159	-1.88891	-3.07839	-2.40481	-2.17737	-1.6899	-1.86341	-1.47805	-1.89913	-1.98063	-1.99398	-1.73567	-2.29805	-2.29788	-1.98628	-1.85238	-2.21084	-1.98801	-2.07714
YDR453C	1.40564	1.23546	1.03309	1.27126	1.84691	1.7169	2.60518	2.413	1.69707	2.63991	2.54353	2.71959	2.19474	2.67265	2.57691	2.34227	2.93922	2.73301	2.5947	1.98809	3.6833	3.87295	3.47228	3.19585	2.90193	2.38768	2.53452	2.16655	0.701195	1.56425	3.08502	2.74417	2.10921	1.76615	1.72873	1.29589	2.14921	1.4016	2.2262	3.29054	2.87631	3.50511	1.08058	1.16198	1.9918	0.766975	3.60266	6.56808	1.94585
YAL008W	1.50045	1.39585	1.65572	1.54793	2.10942	1.69493	2.08905	2.03046	1.76524	1.85356	2.14051	1.99293	1.72832	1.97222	1.85553	1.6276	2.03738	1.87811	1.60228	1.30923	1.65483	1.4748	1.64655	1.62464	2.03193	1.59861	1.66959	1.344	1.34469	1.37555	1.82587	1.53188	1.66354	1.14706	1.74629	1.75665	1.49614	1.08587	1.96468	1.723	1.76497	1.44132	1.49065	0.77208	1.77953	1.37546	1.81437	1.67876	1.95294
YDR490C	1.29975	0.71452	1.21444	0.99618	1.40676	1.08251	1.67643	1.66037	1.27344	1.43112	1.40239	1.5178	1.4199	1.4603	1.60288	1.18474	1.37599	1.74028	1.30271	1.31502	1.3318	1.05737	1.22371	1.11373	0.99621	1.05747	1.28134	0.850145	0.892185	0.699105	1.13216	1.35105	1.11047	0.72827	1.25046	1.20719	1.14347	1.09516	1.04937	0.871485	1.20461	0.95609	0.82146	0.71043	1.21931	0.963545	1.28372	1.36864	1.39024
YDR191W	0.06504	0.32523	0.16871	0.27406	0.50267	0.75917	0.42111	0.210715	-0.008185	0.680145	-0.07053	0.377105	0.196745	0.616475	0.647715	0.907225	0.45069	0.74435	0.52433	0.1765	0.20616	0.129285	0.27303	0.677545	0.08041	0.191785	0.31032	0.612335	0.274115	0.119165	0.236765	0.316975	-0.16118	0.05034	0.12615	0.65576	0.22005	-0.040235	-0.00555	0.552255	0.117535	0.12652	0.4268	0.50341	0.31572	0.230705	0.20428	0.57391	0.490915
YER107W-A	-0.20373	-0.1772	0.15273	0.23416	-0.20312	0.04645	0.61737	-0.067865	0.358595	-0.413895	0.46936	0.441585	-0.214595	-0.398245	0.290335	0.980435	-0.17041	-0.62042	0.60231	0.38033	0.2302	1.22671	0.86261	0.854885	1.22059	0.997035	0.86168	0.880415	1.00863	0.831815	0.471775	0.546595	0.61279	0.70578	1.21657	0.49232	0.60255	1.1045	0.82536	0.526185	0.801375	1.01211	0.9325	-0.00661	1.40225	0.696085	1.38241	0.75299	0.793645
YLR459W	-0.00095	0.13128	0.10523	-0.06414	0.05014	-0.2761	0.14018	0.207065	0.502655	-0.019435	0.31391	0.144085	-0.184525	-0.290635	-0.186605	0.025825	-0.04842	-0.1734	-0.19319	-0.39316	-0.31014	-0.051315	0.04988	-0.327505	0.18602	-0.034785	0.26876	0.399205	-0.246745	0.223675	-0.681875	-0.178725	0.10939	-0.34444	0.05605	-0.29456	0.12449	0.070595	0.15026	-0.078385	0.011895	0.6079	0.14199	0.1016	-0.09188	0.062275	0.46105	0.07584	0.100805
YNL193W	0.78615	0.55901	0.6433	1.05846	0.55725	0.76093	0.55054	1.06832	0.648585	0.786265	0.46661	0.785555	-0.181545	0.198105	-0.082865	0.056525	-0.34594	0.03437	1.21484	1.17347	0.09222	0.451445	0.6255	0.216845	0.58855	1.11183	0.99465	0.876435	1.31151	0.584175	1.05994	1.20359	0.80813	1.07376	1.02542	1.13429	0.57744	0.798275	0.55197	0.377845	0.684505	0.50806	0.62115	0.09533	0.95026	0.836885	0.24414	0.77988	0.743115
YHR099W	-1.14324	-1.12797	-1.05416	-1.00677	-1.01434	-1.10769	-0.97365	-0.762025	-0.891785	-1.03082	-1.24714	-0.849135	-0.819205	-0.666645	-0.667085	-0.494505	-0.64723	-0.65811	-0.77568	-0.82711	-1.01068	-0.763455	-0.99549	-0.669915	-0.7857	-0.943725	-0.80417	-1.38369	-0.963775	-1.02171	-1.2812	-0.878585	-0.62985	-0.48705	-1.08379	-0.77715	-0.55157	-0.695175	-0.92433	-0.962035	-0.682365	-0.79656	-1.16085	-0.77586	-1.30677	-0.863635	-1.01547	-1.08285	-0.767095
YLR360W	0.29102	0.22913	0.39954	0.2149	0.29446	0.4963	0.53975	0.516885	0.331685	0.578165	0.53178	0.353325	0.394105	0.573855	0.433165	0.634615	0.31826	0.58106	0.86364	0.85396	0.4944	0.720075	-0.14188	0.320865	0.28398	0.254115	0.32652	0.437005	0.317795	-0.077165	0.239575	1.29587	0.07241	0.46976	0.14735	0.10071	0.39937	0.820195	0.15619	0.336315	0.450985	0.20591	0.31548	0.48265	0.47154	0.054815	0.31284	0.8534	0.216515
YKL070W	0.26375	-1.77854	-0.22684	0.44332	-0.21544	-0.05325	0.06019	-0.506895	-0.717395	-0.117775	-0.3892	-0.066385	0.445455	0.156205	0.034555	0.139115	-0.03846	-0.17089	0.35023	0.33684	-0.03517	0.459765	-0.49353	0.303595	0.09194	0.651815	0.03558	0.364915	0.643125	0.229805	0.352315	-0.578255	-0.37916	-0.28703	0.07696	0.28877	0.5676	-0.063485	-0.06887	0.295415	0.118775	0.76332	0.30165	-0.12764	0.26081	0.418065	0.61276	0.55908	-0.088895
YPR170W-B	-0.07576	-0.16908	-0.24487	-0.32081	0.07421	-0.19788	-0.38763	-0.227775	0.032925	-0.416175	0.0165	-0.222835	-0.198885	-0.373555	-0.392115	-0.141135	0.20963	-0.3081	-0.44291	-0.74299	-0.4222	-0.368675	-0.15519	-0.361845	0.19707	-0.401995	-0.04158	-0.184495	-0.494635	0.202955	-0.712235	-0.373095	-0.21358	-0.50169	-0.36299	-0.49951	-0.33968	-0.276605	0.12422	-0.446985	-0.186655	0.16872	-0.19893	-0.41471	-0.03269	-0.119795	0.18488	-0.32451	-0.210405
YKL145W-A	0.22639	0.35147	0.51112	0.27567	0.4655	0.39116	0.51468	0.436635	0.610535	-0.084365	0.42188	0.627745	0.861745	0.706035	0.628935	0.595855	0.65926	0.74674	-0.07014	0.48091	0.34942	0.076375	-0.04297	0.553765	-0.2004	0.166685	-0.16786	-0.014785	0.079945	0.261985	-0.081035	0.040305	0.10597	-0.08219	0.39125	0.06697	-0.14243	0.368375	0.25316	0.640715	-0.020475	-0.40516	0.13487	-0.24394	0.53788	0.473035	0.03171	-0.23859	0.274315
YOR142W	0.69794	0.45921	0.93598	0.74179	0.87078	0.3801	1.12337	1.07872	0.944785	1.14119	1.47188	1.05271	0.827005	0.920385	1.00303	0.641865	1.36537	0.91952	0.60044	0.33596	0.22431	0.346965	0.56329	0.527585	0.86578	0.308415	1.29442	0.308675	0.294155	0.596395	0.221115	0.766745	0.71303	0.34501	0.99457	0.76792	0.80253	0.611725	0.58153	0.622265	0.474415	0.88332	0.97654	0.4492	0.49857	0.256395	0.74832	0.38322	0.582635
YLR430W	-1.25429	-1.027	-1.05615	-1.14243	-0.90668	-1.07175	-0.64046	-0.519415	-0.518655	-0.821855	-0.74314	-0.693765	-0.411075	-0.176405	-0.315815	-0.137665	-0.22139	-0.15407	-1.05348	-1.33818	-0.93508	-0.710895	-0.78013	-0.624535	-0.62979	-0.886105	-0.88934	-1.37901	-1.46576	-1.11942	-1.30981	-0.969435	-0.75042	-0.56792	-1.13128	-0.86057	-0.64398	-0.936035	-0.74265	-1.04556	-1.22428	-0.93775	-1.40982	-0.71549	-1.08848	-1.24971	-0.8708	-1.21082	-0.602275
YDR304C	0.19461	0.16714	0.38437	0.29176	0.29435	0.10847	0.50244	0.479075	0.490615	0.376385	0.76873	0.411745	0.393785	0.073095	0.323405	0.402115	0.23019	0.47705	0.31198	-0.06982	0.23791	0.178265	0.24531	-0.187485	0.30207	-0.122585	0.34852	0.291655	-0.053095	0.440215	0.203255	0.141075	0.08054	-0.23016	0.07853	0.09268	0.32056	-0.429415	0.21793	0.020175	0.522725	0.20301	0.46607	0.44464	0.39795	0.153095	0.27196	0.22202	0.301125
YPL020C	0.62679	0.63572	0.61052	0.3959	-0.12543	0.62192	-0.13355	0.022625	0.483295	0.490255	0.17217	0.231205	0.329675	0.145205	0.058715	0.064855	-0.162	-0.25546	-0.47359	0.26678	0.28168	0.386345	0.08458	0.327965	0.11061	0.740685	0.07583	0.680425	0.628905	0.421095	0.813845	-0.106685	0.20192	0.52657	0.25978	0.48612	0.0013	0.442785	-0.05671	0.447735	-0.008025	-0.26931	0.05756	0.6981	0.34654	0.955695	0.14478	0.05815	0.355465
YHL023C	0.19812	0.22667	0.16685	-0.1106	0.09838	0.42793	0.04169	0.175675	0.148775	0.178135	0.04298	0.058665	0.533505	0.499785	0.403275	0.424635	0.22501	0.46439	0.29959	0.19688	0.33679	0.262315	-0.00085	0.282085	-0.00981	0.300275	-0.34104	-0.144885	0.040045	0.076315	-0.103105	-0.206505	0.1644	0.0418	-0.20176	0.07851	0.19491	0.240685	0.15453	0.212235	-0.066515	-0.09682	-0.26706	0.15599	0.05373	0.349885	-0.14367	-0.06053	0.002995
YLR165C	0.90337	1.23956	1.07989	0.87087	0.71481	1.25534	0.40213	0.786455	0.556835	1.2072	0.59484	0.733355	0.646325	0.579405	0.431445	0.527365	0.04636	1.1018	0.87337	1.19611	0.41155	0.737565	0.9011	1.10993	0.81343	1.22798	0.34518	1.30113	1.19047	0.962465	2.06211	0.839325	0.8015	0.68034	0.86736	1.05226	0.34784	0.858135	0.62293	1.02652	1.29971	0.33787	0.41584	1.58903	1.41759	0.948865	0.72683	1.1009	0.829035
YOR283W	-0.3868	-0.61599	-0.7946	-0.36964	-0.56862	-0.48381	-0.90384	-0.890955	-1.0294	-1.09207	-0.96312	-0.839285	-0.736345	-0.455365	-0.700375	-0.594365	-0.73242	-0.75344	-0.62219	-0.89773	-0.91928	-0.546275	-0.8643	-0.669895	-0.72631	-0.740095	-0.68593	-0.380915	-0.420475	-0.639665	-0.609215	-0.572945	-0.56606	-0.5519	-0.79717	-0.94325	-0.56077	-0.521065	-1.05765	-0.924105	-0.908655	-0.89113	-0.90222	-0.647	-0.52886	-0.872665	-1.11257	-0.91194	-0.426515
YMR052C-A	0.36438	1.91656	0.70415	0.6426	0.9215	1.14699	1.20885	1.66023	1.28889	1.81919	1.30828	1.47934	0.495615	1.09705	0.785015	0.710665	0.39388	1.80281	1.61508	0.93872	0.68592	0.952705	0.97415	1.05967	1.25357	1.19741	1.06491	1.03022	0.614165	0.654525	1.96992	1.21002	0.84527	2.05752	1.70055	1.84726	0.86516	0.971045	0.86247	1.20731	1.47826	1.30125	1.83387	0.35122	0.76871	0.810975	1.35007	1.20939	1.18274
YOR053W	0.19186	1.28894	0.27526	0.82115	-0.4955	0.24416	1.23062	0.846865	0.927135	0.281095	0.26338	0.690915	0.070055	0.529795	0.418635	0.502885	0.5836	0.10358	-1.04384	-0.03566	0.86311	0.700695	-0.06249	-0.695225	0.59385	0.985585	0.80594	0.249115	-0.297775	0.955485	0.521625	1.21724	0.9494	0.96299	-0.86032	-0.20869	1.09204	0.688995	0.19187	-0.364445	0.128775	0.59091	-1.35833	0.70219	-0.88255	0.189145	0.42028	0.21546	-0.649345
YJR054W	-0.35142	-0.07576	-0.2787	0.16623	-0.41452	-0.27202	-0.65817	-0.569425	-0.571555	-0.541805	-0.54918	-0.469595	-0.275795	-0.078185	-0.432925	-0.223555	-0.43172	-0.32538	-0.42477	-0.40336	-1.11734	-0.774535	-0.84249	-0.475795	-1.14615	-0.847695	-0.76689	-0.000265	-0.388405	-0.429805	-0.359315	-0.314465	-0.79484	-0.40802	0.04057	-0.14722	-0.62693	-0.597015	-0.87031	-0.927295	-0.759455	-0.89461	-0.42144	-0.45992	-0.58486	-0.218815	-1.01009	-0.63189	-0.492895
YER084W-A	-0.06618	-0.47852	0.03619	-0.25654	-0.12748	-0.0122	-0.10208	-0.371265	0.339455	-0.135975	0.21196	0.021555	0.108915	-0.197635	-0.117555	0.424095	-0.0448	-0.4828	0.3584	0.24965	0.92111	0.548655	0.79395	0.655235	0.71392	0.536665	0.43665	0.735185	0.411025	0.570235	0.502615	0.124485	0.44392	-1.49925	0.5927	0.9841	0.37753	0.783505	0.84819	0.346065	0.101215	0.60612	0.52779	0.85333	0.35501	0.478925	0.46148	0.45642	0.394525
YHL005C	0.6208	0.32738	0.6449	0.28673	-0.13484	-0.2523	0.28501	0.598055	0.278245	0.346815	0.06049	0.026055	-0.043095	0.622875	0.561655	0.246005	0.05222	0.44508	0.64682	0.49704	0.38697	1.39211	0.30828	0.475205	0.33332	0.621395	0.67267	0.942655	0.607585	0.250985	0.327005	0.941285	0.535	0.32459	0.65555	0.57782	0.53345	0.308195	-0.03211	-0.639275	0.220885	0.66708	0.45261	0.56883	1.05759	0.106525	0.98209	0.36345	-0.215355
YMR255W	-0.00806	-0.03578	-0.25939	-0.08972	-0.57904	-0.23936	-0.2604	-0.390655	0.605715	0.136775	0.16063	0.182465	0.296695	-0.042185	0.135745	0.221785	-0.28836	0.12426	-0.29434	0.11434	0.32958	-0.047845	0.17911	0.282175	-0.22989	0.185765	-0.11416	0.193835	0.104675	-0.015255	1.00094	0.212775	0.0462	0.27493	0.02454	0.13939	-0.47136	0.233705	0.27139	0.337425	-0.195405	-0.27397	-0.24608	0.02743	0.50199	0.309825	0.14468	-0.35344	0.159425
YDR029W	-0.1389	0.17365	-0.21013	-0.06537	-0.21125	-0.32449	0.24753	-0.156265	0.121125	-0.505395	-0.14357	-0.362905	-0.351315	-0.143355	-0.232025	-0.099365	-0.26395	-0.32326	0.17519	-0.02409	0.58054	0.288415	0.26822	0.218265	0.29826	0.603435	0.06447	0.663445	0.101705	0.690845	0.621885	0.166035	0.31183	1.07874	-0.02679	0.65654	-0.10047	0.019435	0.58301	0.509485	0.301225	0.18357	0.01524	1.13311	0.50026	0.672305	0.44241	0.5456	0.949875
YPL154C	1.22004	1.41374	1.23834	1.38352	1.50134	1.34085	2.60237	2.73679	2.34262	2.55091	2.89501	2.73202	2.11308	2.59091	2.50855	1.90482	2.43463	2.35898	1.46318	1.23181	1.4347	1.12149	1.40054	1.25792	1.17656	0.690355	1.41078	1.39811	0.937445	2.08424	1.62596	1.84478	1.77947	1.46549	1.52852	1.35066	1.09271	0.911575	1.30916	1.43207	1.25799	2.24609	1.37274	1.68545	1.23567	1.96103	1.23549	1.45365	1.51354
YDR033W	-0.54854	-0.26382	-0.52363	-0.24697	-0.61721	-0.38761	1.18604	1.91124	2.10139	0.754675	1.30576	1.46863	-0.423605	-0.252695	-0.172985	0.079145	0.2654	0.02198	-0.57642	-0.29759	1.18638	1.66021	0.42811	0.237165	-0.00977	0.151435	1.43363	2.37276	0.276555	2.16527	0.908935	2.01121	-0.29483	-0.03884	-0.51282	-0.32339	0.60044	1.39993	1.43568	0.587535	1.32536	1.95585	1.20922	1.93314	-0.39915	2.10319	1.81471	1.47856	-0.705545
YNL043C	0.00911	0.1456	-0.19846	0.44615	0.43076	0.44738	0.39745	0.947515	0.255795	0.530985	0.69403	0.631035	0.786075	0.645555	0.297425	1.0337	0.63392	0.37009	1.64369	0.50919	-0.00724	0.297095	0.97497	0.576525	-0.31026	-0.029685	0.28441	0.281555	0.003775	0.271045	0.304685	-0.317245	2.17381	0.0956	-0.2985	-1.03763	0.12276	0.103995	0.65019	0.246895	1.15112	0.01943	-0.28311	1.06597	0.44773	-0.086335	0.65039	1.1044	0.481535
YDR253C	-0.7237	-0.47928	-0.785	-0.9952	-0.78323	-0.13086	-1.10273	-1.09665	-1.06245	-0.504245	-0.74656	-0.898755	0.567565	0.156565	-0.196155	0.505305	-0.03527	-0.21021	-1.35049	-1.12422	-0.8068	-1.14498	-0.89365	0.076285	-0.77214	-0.546195	-1.76321	-1.85946	-1.35017	-0.018455	-0.465905	-1.74388	-1.41894	-1.2241	-1.68101	-1.04184	-1.06163	-0.469395	-0.28477	0.569095	-0.940115	-0.84215	-0.88069	-0.74133	-1.47805	0.331745	-1.01622	-1.12523	-0.773665
YNL014W	0.02129	0.40255	0.11569	0.34655	0.2231	0.64848	-0.19925	0.109045	-0.523945	0.316015	-0.34984	0.292415	-0.152845	0.373325	0.004545	0.503125	-0.07073	0.09608	0.59242	0.87652	0.19685	0.612575	0.33635	0.679635	0.11396	0.632735	0.37927	0.205975	0.526695	0.337845	0.384085	0.590605	0.03319	0.1416	0.3357	0.39599	-0.21892	0.152555	0.0749	0.338635	0.156565	0.14894	0.16669	0.31512	-0.20332	0.323785	0.28026	0.86008	0.128055
YNL241C	0.65157	0.5763	0.63953	0.50758	0.85654	0.55836	1.16916	0.950365	0.652415	0.766265	1.41816	0.814625	1.31988	1.17033	1.24629	0.898195	1.48674	1.54306	0.18702	-0.2713	0.6869	0.586375	0.59074	0.650535	0.68511	0.260855	-0.16494	-0.577615	-0.246255	0.760125	-0.936335	-0.508635	0.78088	0.48322	-0.01097	-0.10853	0.75932	0.248345	1.1336	0.966875	0.559635	1.3743	0.48352	0.21093	-0.02002	0.869685	0.82492	0.96201	0.465845
YAL032C	-0.10085	0.03317	0.02948	-0.17561	0.02357	-0.25503	0.05937	0.131585	0.408865	0.230645	0.19233	0.014025	-0.099505	-0.016875	0.085835	0.020155	-0.26471	-0.00862	-0.41184	-0.29693	0.34729	0.157625	0.22611	-0.156345	0.12039	0.021775	-0.09189	0.047335	-0.317235	-0.214365	0.457105	-0.176215	-0.16062	0.11215	-0.19921	-0.15102	-0.22946	-0.085415	0.10745	0.093555	0.112205	-0.22045	-0.09539	0.05554	-0.15423	0.015125	-0.42542	-0.20097	-0.103925
YEL011W	4.64964	4.58459	4.74464	4.29734	5.30542	5.09371	5.80533	5.50152	5.55462	5.34239	5.2382	5.81576	4.70983	4.94132	4.80469	4.70714	5.70166	5.65623	5.68057	5.06465	4.73402	4.02599	4.93683	4.2366	5.46532	4.41331	4.97251	3.76753	5.10159	4.91284	5.25741	4.82498	5.78703	4.46108	4.89119	4.45759	4.57566	4.75772	5.71223	4.65907	5.5092	5.541	4.93573	4.05594	5.1299	4.33899	5.48019	5.30414	5.24484
YNL291C	-0.67525	-0.35834	-0.8499	-0.429	-0.34951	-0.60356	-0.36999	-0.068205	-0.414435	-0.308225	-0.14878	-0.261985	-1.02102	-0.848895	-0.657395	-0.526775	-0.54642	-0.86723	-0.81619	-1.15562	-0.68117	-0.494085	-0.76397	-0.452135	-0.30491	-0.870045	-0.41754	-0.305855	-1.21209	-0.384275	-0.679675	-0.255845	-0.69154	-0.34283	-0.83403	-0.9279	-0.34508	-0.928995	-0.41541	-0.442995	-0.519075	-0.23847	-0.76921	-0.41318	-0.67924	-0.571785	-0.46953	-0.94492	-0.515065
YMR104C	1.71757	1.68005	1.62196	1.82395	1.80095	2.05535	2.35296	2.5827	2.15653	2.34117	2.12109	2.38307	0.911245	1.00534	1.20199	1.52174	1.32634	1.54148	1.47168	1.57745	1.81183	1.89224	1.79944	1.10189	1.95073	1.68888	2.16507	1.91722	1.31122	1.2371	1.90494	1.81943	1.36349	1.32009	1.83616	1.69997	1.90821	1.79655	1.72405	1.12757	1.88343	2.15346	1.99901	1.94282	1.85152	1.43873	2.24686	2.38723	1.75452
YDL140C	-0.55409	-0.48773	-0.49015	-0.37911	-0.40258	-0.38001	-0.20287	-0.001025	-0.171945	-0.299915	-0.33933	-0.162985	0.109695	0.237325	0.160735	0.164475	0.38413	0.4131	-0.57632	-0.67339	-0.51199	-0.456855	-0.33698	-0.012545	0.06854	-0.669755	0.13235	-0.847305	-0.827835	-0.425065	-0.884435	-0.278405	-0.04614	-0.42568	-0.6048	-0.44426	-0.0758	-0.289085	-0.12176	-0.140265	-0.407475	-0.16519	-0.38204	-0.36825	-0.45729	-0.489235	-0.15847	-0.50011	-0.063665
YLR079W	-0.1118	-0.36689	0.14842	-0.23216	-0.10647	-0.09435	-0.24744	-0.473415	-0.162335	-0.268525	0.0981	-0.434765	0.268655	-0.179295	0.193135	-0.152095	0.06084	0.35845	-0.22543	-0.07389	0.1635	-0.269585	-0.26423	-0.055545	-0.80901	-0.370505	-0.37087	-0.152575	-0.089205	-0.098605	0.123865	-0.467335	-0.0551	-0.15891	0.20386	-0.21246	-0.42052	-0.119425	-0.08354	-0.352465	-0.478435	-0.21276	-0.30896	-0.25388	-0.16541	-0.085295	-0.15296	-0.1445	-0.128955
YOR348C	0.58734	1.02742	0.19425	0.34259	0.53444	0.51779	3.0039	3.55294	2.90008	3.61593	3.20248	3.6397	1.04516	1.22135	1.37272	1.95852	2.01975	1.78355	0.66463	0.35812	1.79529	1.78343	2.06504	0.275855	0.88516	1.15342	3.48567	2.81173	1.352	1.30462	1.31692	1.4954	1.6142	1.48114	0.03084	0.26388	1.83413	1.00368	1.26434	0.416535	1.49686	2.05654	1.76548	1.4781	2.06948	1.19491	1.87047	1.1653	1.36163
YOR097C	1.28502	1.17069	1.6688	1.12143	1.21659	1.3854	1.62927	1.58123	1.47673	1.68325	1.57266	1.38438	1.10787	0.987385	0.912655	0.750645	0.83005	1.03415	1.16822	1.09197	1.29386	0.761855	1.11738	1.05438	1.18557	0.606505	1.03042	1.48863	1.03293	1.24876	1.50907	0.830315	0.72084	0.82192	1.15999	0.8597	0.87706	0.470455	0.66776	0.797965	1.07666	0.67826	0.89061	0.49831	1.28777	1.12593	1.19727	1.33611	1.34614
Q0143	0.39562	0.26455	-0.47979	0.52727	-0.59726	-1.34185	0.36903	0.367765	-0.073205	-0.502085	0.95446	-0.586575	0.747905	-2.03256	0.520295	-1.39857	1.03427	-0.56749	0.2513	0.42809	0.68265	-0.150565	0.35041	0.622355	0.79533	0.063615	-0.61546	1.15238	0.065655	0.957895	0.537235	0.548265	-0.30442	0.23355	0.48386	0.2347	0.49044	-0.354825	1.2113	0.951475	0.313385	0.4452	0.39535	1.38579	0.54574	-0.018275	0.64728	0.22083	0.455385
YOR072W-B	-1.88282	-1.60596	-0.88413	-0.24024	-0.17139	-2.46182	-2.09924	0.545555	0.467865	-2.51959	-1.28232	0.409185	-0.828515	-0.099915	-0.372585	-0.141685	0.49625	-0.72273	-2.11773	-1.19659	-2.75855	-1.51387	0.58917	-1.62199	-2.92025	0.012875	0.64421	-0.328115	-0.693505	-0.016565	0.257615	0.015285	-1.09308	-0.59006	-0.12141	-1.08631	-0.8646	-0.378025	0.54765	-2.06399	-1.15233	-0.63536	0.48255	-0.43521	-0.79869	0.618565	1.26561	-1.32191	-0.572075
YHR103W	-0.21042	-0.27481	-0.09171	-0.1193	-0.20929	-0.24434	0.12197	0.205065	0.104065	-0.010565	-0.11403	0.090665	-0.180895	-0.080345	0.074575	0.079945	-0.03315	0.07639	-0.26825	0.16448	-0.08057	-0.165885	-0.25009	-0.136595	-0.28067	0.067925	-0.38453	-0.466125	-0.376075	-0.382225	0.142595	-0.260985	-0.13994	-0.07358	-0.1173	-0.23546	-0.43484	0.078875	-0.61985	-0.418435	-0.041915	-0.26494	-0.3842	-0.27678	-0.18044	-0.303105	0.04632	-0.19621	-0.286375
YOL107W	0.68002	0.86646	1.12011	1.03607	1.04796	0.88256	1.48002	1.64563	1.11767	1.46215	1.448	1.20266	0.639195	0.851235	0.775775	0.968055	0.92611	0.97086	0.58674	0.19329	0.62999	0.424555	0.67138	0.579905	0.93751	0.147635	1.47364	1.21273	0.615145	0.960515	0.293975	1.46555	0.54266	0.2819	0.5286	0.74535	0.69039	0.516375	1.07178	0.732415	0.975235	1.31182	0.92468	1.09689	0.48317	0.962585	0.73402	1.03323	0.975205
YOL126C	-1.9636	-1.90479	-1.61989	-1.45606	-1.43717	-2.10123	1.63069	1.33898	1.50103	1.49056	1.79738	1.63749	-0.545405	-0.685105	-0.722015	-0.110205	-0.12856	0.06623	-1.72297	-2.37334	1.05856	1.26978	-1.08997	-1.54944	-0.67588	-1.09596	-0.43302	-0.896995	-2.21385	1.42877	-1.29161	-1.56759	0.44015	0.03069	-1.88621	-1.97038	0.84167	0.256755	-0.91522	-1.3518	1.12526	1.28576	1.44219	1.15151	-1.87659	1.17227	-0.90754	-1.09712	-2.35805
YHR026W	-0.58696	-0.35581	-0.69553	-0.37857	-0.40956	-0.6955	-0.26844	-0.668715	-0.089105	-0.605385	-0.24861	-0.306315	-0.285935	-0.443675	-0.272565	-0.259335	-0.20675	-0.40818	-0.63181	-1.02632	-0.50876	-0.347185	-0.15992	-0.343365	0.36051	-0.384915	-0.28198	-0.404015	-0.585525	-0.440375	-0.985115	-0.484225	-0.40956	-0.50627	-0.59004	-0.69982	-0.29938	-0.625305	0.10984	-0.555815	-0.380775	-0.14791	-0.39599	0.00587	-0.5355	-0.449085	-0.3217	-0.55654	-0.630155
YGR028W	1.70428	1.51832	1.50932	1.66629	1.52188	1.58881	1.38425	1.37509	1.30764	1.18229	1.2989	1.29906	1.04371	1.10739	1.16796	0.940135	1.21133	1.21012	1.62953	1.69123	1.15145	1.13932	0.91274	1.43538	0.76474	1.03858	1.20008	1.47986	1.69203	1.45396	1.42335	1.07595	0.88114	1.6707	1.50391	1.26252	1.04224	1.15979	0.79393	1.11742	1.03104	0.88697	1.30289	1.03914	0.89784	1.45344	1.14443	1.54741	1.34274
YGL061C	-1.01157	-0.92282	-1.25706	-0.81452	-1.21025	-1.14123	-0.92406	-1.59221	-0.582525	-0.861295	-0.70761	-1.05144	-0.666455	-0.846935	-0.942465	-1.13766	-1.51648	-1.42642	-1.56813	-0.78129	-0.75341	-1.03192	-0.79587	-0.854095	-1.22423	-0.489495	-1.29966	-0.282005	-0.916235	-0.682265	-0.152905	-0.709865	-1.31803	-0.54554	-0.7366	-0.73171	-1.24839	-0.891725	-1.217	-0.776055	-0.865725	-1.17939	-1.08253	-0.75413	-0.95399	-0.513125	-1.39094	-1.12647	-1.13549
YMR141W-A	-0.16906	1.46136	-0.74987	-0.24263	-0.33892	-0.31744	0.13055	-0.882905	-0.369385	0.388495	0.07732	-0.686365	-0.943925	-0.083755	-0.503545	-0.024485	1.11571	0.87019	-0.13513	1.0703	0.43146	1.57689	0.90078	0.139415	-0.55834	0.266255	1.50483	-0.210065	0.696255	-0.410385	0.139145	0.543905	0.64336	0.91888	0.42059	0.22705	0.2476	0.425115	-0.28143	-0.196295	1.52496	-0.15508	0.20301	0.13665	0.06058	1.18329	0.65502	0.33837	0.233505
YJL089W	1.21942	2.03972	1.40647	1.54493	1.3811	1.68104	2.15304	1.96551	1.52714	2.32859	1.89908	2.25935	2.22843	2.52565	2.01119	2.34684	2.00211	2.03071	1.97556	1.59131	1.64263	2.08114	1.51057	1.26011	1.74298	1.35631	1.97189	1.49528	1.38414	1.57471	2.43555	2.49934	1.94404	2.03623	1.86851	2.2067	1.67478	1.6425	1.86106	1.88587	2.03096	1.87499	1.08158	1.94548	1.70846	1.47524	1.57347	2.24151	1.43799
YKL116C	-0.13427	-0.33864	0.0347	-0.15708	-0.23378	-0.2902	-0.05299	0.363525	-0.355865	-0.077805	-0.11927	-0.023125	-0.299105	0.007095	-0.318985	-0.040175	0.03872	0.26058	-0.42367	-0.57154	-0.53204	-0.080015	-0.48785	-0.514315	-0.0789	-0.426245	-0.05304	-0.318265	-0.364285	-0.429265	-0.740055	-0.327165	-0.44873	-0.28859	-0.53589	-0.33846	-0.32061	-0.291345	-0.42375	-0.686505	-0.146865	-0.33032	-0.29787	-0.12091	-0.49522	-0.206955	-0.10198	-0.27241	-0.246265
YHR134W	0.25817	-0.10264	-0.10723	-0.19089	0.2695	-0.24513	-0.32925	-0.277715	-0.234885	-0.279225	-0.17357	-0.543855	-0.061495	-0.130755	-0.088065	-0.130225	-0.01843	-0.51915	-0.3716	-0.32578	-0.00891	-0.348495	0.26766	-0.403375	-0.24162	-0.332625	-0.13009	0.388075	-0.091375	-0.076245	-0.187495	-0.409535	-0.28476	-0.32922	0.1946	-0.29408	-0.30316	-0.320605	0.06137	0.209735	-0.357655	-0.13186	-0.03613	-0.07463	-0.10582	-0.052505	-0.75843	-0.20982	-0.009955
YOR022C	0.83616	0.93639	0.91146	0.76883	0.83483	1.10467	0.63715	0.900305	0.797005	1.03882	0.92237	0.602445	0.921915	0.961395	1.06628	0.727245	0.82394	0.5801	0.66813	0.80486	0.83307	0.866625	0.7874	0.892245	0.67982	1.0701	0.26714	0.560655	0.710415	0.613145	0.938885	1.0114	0.49063	1.29791	0.3734	0.72258	0.72817	0.725525	0.97719	0.680765	0.569925	0.30977	0.18473	0.92166	0.68291	0.785205	0.67721	1.28566	0.841235
YBR228W	-0.1914	0.06727	-0.0435	0.07023	0.05128	0.18462	-0.21371	-0.097565	-0.267235	-0.233565	-0.12048	-0.139415	-0.150455	0.215785	-0.084955	-0.116385	-0.13239	-0.06091	-0.28067	0.02005	0.02162	-0.026105	0.06952	0.291435	-0.1872	-0.051495	-0.39862	0.265605	-0.155105	-0.059485	-0.212865	0.011105	-0.29375	-0.07271	-0.11891	0.07416	-0.45628	-0.262615	-0.23933	0.100645	-0.062205	-0.26799	-0.43371	-0.05093	-0.04629	-0.175305	0.16174	-0.17925	-0.189435
YNL320W	-0.05244	0.22122	0.09585	0.54835	0.03433	0.2336	0.1341	0.267625	0.420115	0.179505	0.26059	0.208875	-0.232315	0.029535	0.011465	0.335585	-0.12048	0.17282	-0.24856	-0.3401	-0.41076	-0.111945	-0.03302	-0.402935	0.37898	0.017585	0.41023	-0.052535	-0.029135	0.337675	-0.717805	0.177165	0.02131	-0.1783	0.24584	-0.00854	-0.1445	-0.161145	0.0289	-0.339275	0.126445	0.50281	-0.06673	0.11871	-0.13564	0.195015	0.22669	0.17254	0.080365
YGR123C	-2.25951	-2.33319	-2.1683	-1.92665	-1.90044	-2.4107	-2.12761	-2.13851	-2.17294	-2.37682	-2.37242	-1.9023	-2.00794	-1.87301	-1.93538	-1.4509	-1.69013	-1.63672	-1.76476	-2.15618	-2.64817	-2.29014	-1.91072	-1.75282	-2.00248	-2.21807	-2.15253	-2.24654	-2.14581	-1.87566	-2.18188	-1.87654	-2.43736	-1.44473	-2.19025	-2.0123	-1.94096	-2.14392	-2.05911	-2.25414	-1.76744	-1.94326	-1.74255	-1.77708	-2.43782	-2.179	-2.1509	-2.2521	-2.26275
YMR220W	-0.33677	-0.50277	-0.58777	-0.53273	-0.75751	-0.55308	-0.68489	-0.756475	-0.972865	-1.24389	-1.05717	-0.898905	-1.27035	-1.20534	-1.12865	-1.10404	-0.95474	-1.21161	-0.65797	-0.88472	-1.18133	-0.814115	-1.18053	-0.839535	-1.00356	-0.882625	-0.85052	-0.811515	-0.603545	-0.924015	-1.21165	-1.08581	-0.98777	-0.94237	-0.95928	-0.78656	-1.10176	-1.21966	-0.8851	-0.713375	-0.707905	-0.98812	-0.86327	-1.14652	-0.99423	-1.01978	-1.07313	-1.1892	-1.33549
YBR269C	1.32207	1.13316	1.33736	1.23369	1.5852	1.21893	1.78488	1.86105	1.63779	2.2046	2.08025	2.03161	1.40183	1.30736	1.70487	1.36844	1.45423	1.48806	1.25468	0.70139	1.33025	1.07125	1.41344	1.2162	1.05796	0.960155	1.36773	0.973655	1.07157	1.47405	1.37068	1.30411	1.44748	0.97699	1.4772	1.18016	1.37759	0.711515	1.35459	1.31557	1.50693	1.97845	1.37283	0.78084	1.44791	1.24352	1.77202	1.66682	1.35136
YMR188C	-0.09409	-0.04653	-0.04003	0.03165	-0.07541	-0.15384	-0.20779	-0.352775	-0.001735	0.344515	0.71212	-0.170325	-0.164535	-0.364675	-0.317645	-0.486615	-0.44185	-0.35651	-0.60999	-0.04303	0.60236	-0.328285	-0.41427	0.107995	0.24601	0.399325	-0.18667	0.184445	-0.087165	-0.005905	1.51984	-0.090905	-0.05393	0.08806	-0.01548	-0.15834	-0.53958	-0.043605	-0.79158	0.340865	0.117405	-0.71852	-0.36695	-0.68896	-0.24744	-0.094635	-0.146	-0.88732	-0.734455
YLR290C	1.67985	1.38394	1.65321	1.6169	1.39555	1.69973	1.05354	1.11579	1.02076	1.26154	1.26845	1.17148	1.28717	1.41047	1.35953	1.29058	1.1808	1.37462	1.0518	1.14332	0.92821	0.741035	1.22789	1.47158	0.98674	1.1403	0.96375	0.944675	0.919425	0.652345	1.82656	1.52146	1.25444	0.86082	1.50272	1.59306	1.17257	1.02391	1.02868	1.35587	1.82391	1.31006	1.0764	0.89552	1.2423	0.775295	1.46637	1.77095	1.02968
YNL258C	0.43821	0.40736	0.5513	0.25576	0.08915	0.26735	-0.28316	-0.020385	0.113325	-0.178735	-0.11749	-0.045025	0.007575	0.103035	-0.073725	-0.000505	0.02015	-0.43734	-0.02772	0.19043	-0.25053	-0.186805	-0.37227	-0.298195	-0.45921	-0.103175	-0.30953	0.109215	0.151635	0.178235	0.055835	5e-06	0.15886	-0.21778	0.07104	0.12701	-0.38257	-0.284735	-0.37425	-0.350495	-0.128045	-0.38741	-0.22879	0.11031	0.13779	0.049205	-0.07748	-0.1494	0.086015
YNL075W	-2.74118	-2.61503	-2.58262	-2.47876	-2.43958	-2.67586	-2.91438	-3.13225	-2.39676	-3.19915	-2.84297	-2.70234	-2.40655	-2.58928	-2.51512	-2.10181	-2.77294	-2.60703	-2.38004	-2.75637	-2.26386	-2.5057	-2.08651	-2.37019	-2.66325	-2.07504	-2.64343	-2.55688	-2.40146	-2.22932	-2.54699	-2.90709	-2.49323	-2.38445	-2.32561	-2.48384	-2.61009	-2.31243	-2.4916	-2.57057	-2.6215	-2.33015	-2.74117	-1.99976	-2.73711	-2.94902	-2.68932	-3.2673	-2.85472
YPR159W	-0.1189	-0.14404	-0.07805	0.01915	-0.12118	-0.14414	0.0439	0.246685	-0.019525	0.036195	0.02502	0.114425	-0.078605	-0.004815	0.016855	-0.283895	0.15866	0.02671	-0.36572	-0.66221	-0.93435	-0.786365	-0.23497	-0.313495	-0.14975	-0.557545	-0.39716	-0.380335	-0.411745	0.137155	-0.658565	-0.325155	-0.25886	-0.65768	-0.17176	-0.23674	-0.51445	-0.477275	-0.2176	-0.537255	-0.426875	0.00532	-0.16949	0.01047	-0.67984	-0.113315	-0.6018	-0.67569	-0.450025
YMR198W	-0.14626	-0.11708	-0.09689	-0.22335	-0.29874	0.15234	-0.42878	-0.135645	-0.134585	-0.185625	-0.32022	-0.217855	0.164125	0.189785	0.080295	0.037055	-0.0137	-0.14998	-0.62702	-0.13381	0.11218	0.089685	-0.14072	0.358695	-0.45063	-0.293715	-0.38244	-0.584925	-0.301015	-0.524665	-0.111595	0.313935	-0.05663	0.28146	-0.36157	0.17446	-0.65184	-0.096545	0.34264	0.367515	-0.368955	-0.66373	-0.58745	0.19155	-0.65948	-0.411175	-0.69702	-0.6219	-0.218295
YHR089C	-2.2215	-2.59985	-2.48988	-2.32179	-2.05333	-2.68105	-2.81236	-3.71428	-2.87104	-3.26947	-3.11829	-2.47492	-2.23249	-2.28316	-2.16974	-1.7587	-2.22933	-2.2973	-2.13158	-2.76915	-3.01498	-2.85742	-2.11525	-1.88455	-2.46548	-2.29624	-2.89662	-2.71579	-2.36917	-2.24485	-3.05219	-2.94814	-3.12766	-2.31278	-2.13451	-2.30358	-2.26884	-2.89858	-2.06028	-2.14582	-3.0617	-2.84052	-2.34348	-2.72858	-3.58822	-3.49471	-2.73305	-3.74515	-3.06168
YBR190W	0.08961	1.19681	0.71925	0.99982	0.26692	0.75277	1.49426	1.32109	0.498835	1.11163	0.39436	2.02542	0.587435	0.904345	0.592785	0.596735	0.46915	0.59131	0.66894	1.38241	0.63106	1.04251	0.52619	1.26764	-0.42869	1.3662	0.78647	1.23008	0.533165	0.702875	0.456135	1.74696	0.54192	0.45954	0.83309	2.04065	0.84933	1.36799	0.35135	1.38485	0.365185	1.14919	0.49338	-0.66454	1.21533	0.999835	0.05741	1.17417	0.847065
YBR194W	-0.33168	0.0895	0.02572	-0.19265	-0.34898	-0.00557	-0.26406	0.027965	-0.312055	-0.503405	-0.11682	-0.086775	-0.144235	-0.153215	-0.305565	-0.605375	-0.50792	-0.13433	0.28834	0.29299	0.05642	-0.195155	0.33673	0.339125	0.40406	0.466045	-0.20874	-0.064435	0.040465	-0.024895	0.594725	0.108965	0.01282	-0.66813	-0.15981	0.34119	-0.09439	0.025745	-0.07985	0.369845	-0.112205	-0.71258	-0.14548	-0.44252	-0.06474	-0.278565	0.91591	0.2881	-0.174345
YNR018W	-0.62841	-1.03369	-0.6702	-0.82419	-0.77953	-1.04638	-1.05483	-1.10328	-1.05296	-0.950145	-0.9457	-0.947885	-0.933945	-1.29154	-1.06194	-1.05282	-1.03877	-0.99008	-0.69034	-0.9244	-1.2225	-1.11658	-1.11458	-1.09693	-1.21809	-1.1829	-0.70457	-0.791055	-0.832425	-0.567705	-0.994275	-0.793505	-1.11312	-0.79917	-0.59082	-0.78537	-0.7661	-1.01815	-1.06124	-1.45304	-1.04127	-0.75196	-0.59457	-0.88634	-0.60281	-0.717295	-0.82782	-1.53055	-1.1079
YAL044C	-0.22349	-0.369	-0.19592	-0.26892	-0.03437	-0.00471	0.29177	-0.014585	-0.133045	-0.119665	0.22099	-0.091225	0.019475	-0.137185	0.195525	-0.260945	0.13272	-0.15693	-0.02293	-0.28332	-0.05888	-0.437095	-0.38624	-0.658115	-0.92608	-0.977465	-0.92101	-0.623545	-0.656565	-0.455415	-0.562945	-0.481695	-0.11785	-0.10769	0.17784	0.18682	-0.7744	-0.753245	-0.5717	-0.656575	-0.648335	-0.58693	-0.51194	-0.38207	-0.43182	-0.736725	-0.27143	-0.99694	-0.761915
YKL139W	-0.54975	-0.27284	-0.54695	-0.76518	-0.53563	-0.26668	-1.11339	-0.581535	-0.736455	-0.862165	-0.83615	-0.744875	-0.403865	-0.394625	-0.506035	-0.532055	-0.80932	-0.66446	-0.8565	-0.27329	-0.2694	-0.550175	-0.49952	-0.314225	-0.8652	-0.342845	-0.93297	-0.455725	-0.612925	-0.625455	0.212845	-0.053395	-0.58676	-0.68243	-0.55479	-0.2806	-0.75321	-0.335285	-0.65103	-0.550795	-0.998335	-0.72926	-1.0838	-0.41413	-0.64961	-0.589315	-0.57537	-0.76948	-0.703215
YKL197C	-0.10423	-0.14576	-0.28282	-0.31599	-0.10711	-0.29919	-0.06522	0.122675	0.021255	-0.058045	0.06807	0.003575	-0.045495	0.275465	0.057885	0.192285	0.04065	0.05788	-0.02696	0.14109	-0.02917	0.042545	0.09349	0.083385	-0.238	-0.386635	-0.0975	-0.590945	-0.218475	-0.144525	-0.701285	-0.077545	-0.312	-0.41395	0.03731	-0.01866	-0.22721	-0.258825	0.137	-0.264225	-0.357825	-0.28984	-0.52583	-0.19416	-0.30572	-0.054245	-0.48257	-0.39938	-0.043705
YGR138C	0.95082	1.24649	0.94477	1.11618	0.63963	0.34375	-0.60622	-0.498875	-0.206425	-0.789655	-0.9652	-0.688925	-0.327385	-0.396795	-0.301345	0.007465	0.03212	-0.15071	-0.01178	-0.05021	-1.89681	-1.0893	-0.02742	-0.670945	0.5382	0.536105	-1.24185	-0.797835	1.10967	1.04167	-1.06313	-0.309135	-0.14555	0.13373	0.5604	-0.03335	-1.0173	-0.537325	0.1829	-0.994475	-0.291715	0.26805	0.72026	0.91924	-0.58357	0.377215	0.62398	0.82843	-0.546825
YHR129C	-1.19047	-1.08946	-1.23263	-1.14429	-1.00905	-1.18268	-0.94149	-1.18792	-1.32835	-0.726855	-0.9095	-0.625055	-0.914985	-0.697425	-1.00625	-0.599725	-0.74971	-0.70882	-1.06713	-0.92174	-0.94197	-0.723425	-1.04696	-0.693405	-1.15315	-0.833805	-1.21524	-0.638275	-1.13892	-1.08781	-0.652345	-1.17355	-0.98726	-0.75737	-1.34043	-1.06957	-1.26408	-1.0859	-1.16166	-0.743115	-0.799535	-1.09098	-0.99642	-0.97864	-1.20772	-0.776785	-1.49184	-1.03266	-1.38309
YLR436C	0.66616	0.79347	0.89306	0.58685	0.74179	0.60294	1.08016	1.06143	0.993255	0.755435	0.76252	0.930265	0.449435	0.246195	0.416185	0.621085	0.43275	0.61109	0.75932	0.4983	0.96305	0.949885	0.67398	0.586805	0.92309	0.521925	1.29918	0.399755	0.618445	0.516325	0.281115	0.608595	0.73799	0.47736	0.5913	0.43605	1.12994	0.769805	0.96728	0.332215	0.909045	1.15189	0.82035	0.789	0.79445	0.706245	0.92664	0.83979	1.0774
YOR253W	-1.25242	-1.34531	-1.21113	-1.19057	-1.34245	-1.28219	-0.8537	-0.747675	-0.963425	-0.820235	-1.02836	-0.890535	-0.842975	-0.854895	-0.997955	-0.832655	-1.08392	-1.0895	-0.92283	-1.30517	-1.09914	-1.29977	-0.91052	-0.777895	-0.89103	-1.09773	-1.18167	-0.724155	-1.21751	-0.958485	-0.420445	-0.953415	-0.96286	-0.74838	-1.15823	-0.92204	-0.81907	-1.42687	-0.89959	-1.13139	-0.792005	-1.52314	-1.14816	-1.27924	-0.95583	-1.25608	-0.81372	-1.36019	-1.13132
YNL268W	-0.32587	-0.15368	-0.14954	-0.1879	0.07076	-0.1572	-0.56896	-0.275415	-0.334345	-0.726865	-0.41448	-0.582995	-0.508615	-0.458445	-0.655485	-0.396285	-0.33071	-0.47928	-0.61826	-0.71159	-0.49929	-0.216535	-0.08006	-0.152515	-0.19413	-0.548945	-0.13764	-0.410235	-0.172035	-0.391295	-1.22961	-0.464835	-0.19242	0.00848	-0.4677	-0.60532	0.0985	0.092265	0.00999	-0.391395	0.076285	0.55845	-0.21985	-0.14452	-0.23866	-0.433165	0.10535	0.0853	-0.157735
YIL105C	0.47832	0.51512	0.45085	0.51845	0.23571	0.65186	0.69506	0.810555	0.586785	0.994905	0.63097	0.809865	0.120815	0.253935	0.406085	0.248125	0.16066	0.32581	0.66059	0.98133	0.84657	0.652955	0.41773	0.042715	0.07425	0.321015	0.13262	0.133895	0.958825	0.325615	0.778205	0.323655	0.16004	0.7246	0.42372	0.4754	0.4837	0.972845	0.18669	0.180795	0.883195	0.22154	0.48673	0.30825	0.50285	0.458815	0.34693	1.04755	0.156475
YDR403W	-0.01834	0.88948	0.32787	0.48955	0.10747	0.4032	0.1412	0.426465	0.411485	0.614275	0.42178	0.395565	0.373075	0.627005	0.396825	1.15407	0.48621	0.68546	0.62502	0.60694	0.60237	0.939295	0.85185	0.673735	0.45316	0.562055	0.74263	0.904085	0.515975	0.611915	0.486455	0.873695	1.31709	1.26225	0.61482	1.04418	0.71883	0.383305	0.37996	0.880155	0.988935	0.89829	0.78966	-0.03987	1.14235	0.733735	0.423	2.01542	0.535855
YDL029W	0.63965	0.75083	0.58817	0.62687	0.91984	0.66626	1.14148	1.45232	0.948605	0.736175	1.00421	1.18762	0.829965	0.996785	0.936405	0.734545	1.02336	0.76116	0.69411	0.95007	0.56519	0.491965	0.25629	0.768935	0.27419	0.316775	0.58662	0.445395	0.570845	0.749315	0.456485	1.051	0.73234	0.69237	0.99439	0.85808	0.51232	0.788165	0.43962	0.650135	0.473955	0.3119	0.5217	0.23848	0.55291	0.677135	0.64515	0.68507	0.534585
YOR132W	0.80401	0.89384	0.82559	0.60166	0.59386	0.86296	0.79348	0.916275	0.788775	0.993545	0.77024	0.810465	1.15406	0.903235	1.09028	0.805175	1.04826	1.22398	0.73107	1.13259	0.74687	0.607315	0.97792	0.969665	0.38972	0.451185	0.40889	0.513185	0.888805	0.713745	0.610865	0.453355	0.82918	0.7065	0.75888	0.63558	0.64169	0.780685	0.63614	0.633225	0.532765	0.45404	0.4537	0.83907	0.84348	0.676455	0.58453	0.61974	0.701065
YPR160C-A	-0.62973	-0.60609	-0.45124	-0.67598	-0.58517	-0.80018	-0.6257	-0.426145	-0.564405	-0.544105	-0.35568	-0.570185	0.384825	-0.761135	-0.376005	-0.788815	0.41825	-0.57606	0.80639	-0.03146	0.8832	-0.041565	0.19792	0.242055	0.92049	0.117665	0.33601	-0.469915	-0.181745	-0.592185	0.610065	0.079065	-0.93031	0.10111	-0.02378	-0.05819	-0.09982	-0.071945	0.07684	0.181305	-0.198335	-0.07429	-0.31643	0.04775	0.14495	-0.596475	-0.13929	0.27455	0.403855
YCL026C-B	1.70764	1.26927	1.34764	1.36405	2.01853	1.83023	0.55256	0.576895	0.328985	0.475685	0.79013	0.582905	1.37203	1.1118	1.49491	1.5958	1.74908	1.40713	0.72033	0.46	0.30378	0.131265	0.13426	0.246145	0.2185	-0.230945	0.17287	-0.281005	0.310015	1.05181	-0.551095	-0.600945	1.02467	0.20964	0.65839	0.34791	1.32765	0.641225	1.34906	1.29842	0.441305	0.76494	0.49254	0.04583	1.14364	0.910615	0.91107	2.96276	0.508685
YPR092W	-0.56454	0.10613	-0.28719	-0.15032	-0.28177	-0.20054	1.22859	0.704685	0.314735	0.245965	0.3633	-0.856955	0.183905	-0.372605	0.550555	-0.350615	0.23835	0.49948	1.81869	0.23249	1.28839	0.985695	0.2942	-0.410955	0.74097	0.213255	1.6784	0.185915	0.933485	0.451225	1.74672	0.372635	0.78904	0.3673	1.81075	0.60355	1.41603	0.074095	0.46906	0.283595	1.09875	0.59097	1.2968	-0.1927	0.31893	0.689995	0.03163	-0.61477	0.545295
YDR525W-A	1.65607	1.87865	1.73774	1.79099	1.83896	1.24879	1.6404	1.11702	1.83567	1.45504	2.00292	1.56578	1.19118	0.936205	1.08926	1.33488	1.2133	1.39905	1.25938	0.71917	1.24826	0.847995	1.92383	1.10357	1.93062	1.58655	2.18328	1.4022	1.15932	1.7311	0.774325	0.911605	1.92797	1.0953	1.37307	1.22519	1.4419	1.38718	1.47216	1.01493	1.70202	2.14945	2.07795	1.66369	1.49318	1.73633	1.74632	1.6085	1.94893
YPL255W	-0.58367	-0.31822	-0.52993	-0.5324	-0.84889	-0.30425	-1.15747	-0.593615	-0.543715	-0.508025	-0.55013	-0.658055	-0.055825	-0.201675	-0.204845	-0.207915	-0.30749	-0.37516	-1.0111	-0.59157	-0.44603	-0.630995	-0.53896	-0.078665	-0.83705	-0.358515	-0.96182	-0.334535	-1.21054	-0.625895	0.227165	-0.458075	-0.666	-0.39883	-0.92741	-0.42214	-1.45828	-0.603835	-0.79165	0.043375	-0.611145	-0.83182	-0.86239	-0.49293	-0.68314	-0.785735	-1.28661	-1.07123	-0.995165
YEL012W	2.7882	2.82328	3.04277	2.93602	2.63814	2.90303	2.95922	2.99259	3.17155	3.46102	3.32361	2.97926	2.92817	3.09834	2.96372	2.40686	2.94067	3.14188	2.02196	2.82394	2.84871	2.08229	2.23833	2.21242	2.03198	2.18986	2.20368	2.70321	2.71605	2.91054	4.10233	2.57028	2.33825	2.24665	2.67667	2.60466	1.35273	2.42285	1.87159	2.61844	2.85521	1.70373	2.79768	1.76182	2.54571	3.03659	2.47128	1.88031	2.40537
YOR192C	-0.31746	0.50021	-0.07695	0.19914	-0.18103	-0.05901	-0.09616	0.312525	0.054545	0.354445	0.07559	0.162635	0.430805	0.708555	0.334455	0.578595	0.79296	0.67728	0.11315	0.2917	0.27537	0.490885	0.40668	0.395145	0.17547	0.417995	0.09542	0.313285	0.135765	0.372025	-0.457705	0.981055	0.5304	1.21748	0.49398	0.29195	0.01207	0.304085	0.4906	0.138535	0.021445	0.64486	0.16752	0.6216	-0.10643	0.333105	-0.06461	0.15635	0.643105
YGL229C	1.63738	1.67906	1.71939	1.67263	1.57219	1.79501	2.4935	2.6509	2.4784	2.6109	2.29056	2.35957	1.96647	2.56171	2.36926	2.19266	2.59897	2.59312	2.45639	2.24607	2.29355	2.57855	2.2495	1.94741	2.41284	2.09126	2.35914	2.21296	1.7412	1.14336	1.55147	2.3315	1.85104	1.27317	1.91889	2.26365	1.82075	1.9643	2.43882	2.38756	2.25088	2.22578	1.88076	1.11808	1.92405	1.48361	2.48682	2.19814	1.9581
YER065C	2.0981	1.86094	1.84103	1.81345	1.99094	1.84812	1.50165	1.68969	1.4667	1.65688	1.19481	1.43392	0.885365	1.29421	0.915855	0.933725	0.90407	1.34491	1.47992	1.51307	1.16433	1.26324	0.91927	1.114	1.50077	1.74886	1.15874	1.62241	1.5879	0.738055	1.37376	1.52502	1.73244	1.28076	1.90082	1.69292	1.38091	1.13682	1.66696	1.70249	1.38929	1.46554	2.1245	1.58719	1.19529	0.804225	1.17342	1.22609	1.15179
YPR194C	1.40892	1.73296	1.39939	1.749	1.28818	1.39785	2.55093	2.17176	2.45795	2.35186	2.54644	2.2508	-0.223575	-0.175715	-0.008665	0.417075	0.10427	-0.05922	1.93904	1.52924	0.97593	1.04992	2.30867	1.628	0.94641	0.983715	1.04735	2.17522	2.10255	1.42247	1.89691	2.94484	2.94526	2.75961	2.06652	1.52459	0.85798	0.704105	1.0342	1.6139	2.40099	2.33775	1.97304	2.72119	1.40751	1.57631	0.59317	0.63261	2.49368
YOL005C	0.01261	-0.17541	-0.00162	-0.21252	0.2316	-0.26454	-0.26111	-0.729745	-0.283575	-0.118015	-0.07879	-0.394045	-0.339645	-0.871435	-0.482075	-0.517235	-0.32759	-0.61501	0.15055	-0.54967	-0.31683	-0.474845	-0.31401	-0.565555	-0.13328	-0.371175	-0.48057	-0.303075	-0.526685	-0.020745	-0.167735	-0.648555	-0.44101	-0.36987	-0.0599	-0.52643	-0.00614	-0.541045	-0.59884	-0.352935	-0.304345	-0.31731	-0.38186	-0.75563	-0.29683	-0.431555	-0.22258	-0.5431	-0.380115
YML052W	-0.19823	0.07275	0.06504	0.11795	0.06238	-0.45127	-0.52305	-0.502965	0.123485	-0.359535	-0.26878	-0.247725	-1.10129	-1.37566	-1.13003	-1.15709	-1.15189	-1.13963	-0.47685	-0.92907	-0.84948	-0.524485	-0.09304	-0.688355	0.07991	0.076675	0.20976	-0.115645	-0.131895	-0.273535	-0.394885	-0.320975	-0.59242	-0.5496	-0.28298	-0.58082	-0.44922	-0.324095	-0.11473	-0.918055	0.036495	0.70161	0.14149	0.16533	-0.4283	-0.456085	-0.0421	-0.09258	-0.169355
YML064C	-0.16998	-0.23572	-0.41233	-0.38838	0.14719	0.04096	-0.15235	-0.128965	-0.027595	-0.130865	-0.00298	-0.042495	0.177255	0.147995	0.138965	0.193175	0.02732	0.13561	-0.48857	-0.46865	0.16012	-0.202935	-0.04018	0.341455	-0.33424	-0.388245	-0.06674	0.040825	-0.432075	-0.203565	-0.019245	-0.479215	-0.26014	-0.00427	-0.26479	0.00028	-0.3166	-0.272785	-0.19	0.297665	-0.013065	-0.30658	-0.64971	-0.64059	0.21201	-0.700175	0.03277	-0.00527	-0.391885
YHL019C	0.42322	0.57503	0.54752	0.36144	0.30697	0.5542	0.66563	0.435685	0.792345	0.813245	0.78975	0.487745	0.700045	0.625935	0.705705	0.370355	0.53576	0.33204	0.07274	0.43875	0.73457	0.459205	0.52853	0.588475	0.27292	0.456365	0.57422	0.069275	0.276865	0.327115	1.1314	0.465205	0.286	0.15027	0.30854	0.47603	-0.10071	0.447265	0.6032	0.577485	0.141525	0.10439	0.3365	0.49207	0.34981	0.560325	0.32465	0.10506	0.581075
YBR167C	-0.15832	-0.31387	-0.55925	-0.31292	-0.7193	-0.20528	-0.80271	-0.741515	-0.269905	-0.766005	-0.39769	-0.584585	-0.764065	-0.654535	-0.918555	-0.648435	-1.28237	-0.96509	-0.74125	-0.53474	-0.38713	-0.617045	-0.61734	-0.130285	-0.4432	-0.550255	-0.98279	-0.222025	-0.667825	-0.305915	0.010205	-0.340745	-1.1185	-0.24503	-0.32421	-0.49128	-0.77999	-0.934455	-0.98934	-0.349015	-0.272645	-0.7889	-0.61142	-0.16892	-0.46682	-0.725305	-0.68115	-0.18273	-0.318855
YHL046C	1.56458	1.60809	1.68856	1.30173	1.40839	1.37004	1.14645	0.570095	1.09817	1.60342	1.02633	1.04133	0.759045	0.597515	0.884335	0.745815	0.59987	1.22164	1.46779	1.22025	0.52508	0.511835	1.27784	0.457565	1.14861	0.676385	1.37319	1.64566	0.846905	1.23388	0.549045	1.37217	0.40408	0.42595	1.1011	1.31642	1.54802	0.682795	0.56329	0.437935	1.29827	1.09956	1.05944	0.81713	1.36714	1.38236	1.25617	1.33746	1.30676
YFL016C	1.81913	1.73059	2.13337	1.66152	0.89237	1.43996	1.137	1.09908	1.47514	1.2284	1.22645	1.25111	0.731445	0.647035	0.937705	0.656435	0.86867	0.80618	1.43083	1.56001	0.95762	0.965375	1.29241	0.752345	0.90717	1.08068	0.75459	0.745475	2.47533	1.45551	1.0734	1.5661	1.51754	1.29414	2.00759	1.53071	0.83548	0.866185	1.10945	1.199	0.655945	1.53529	1.15204	1.34481	0.90403	1.55749	1.05237	0.90807	1.3645
YPR176C	0.03314	-0.19099	0.0272	0.28588	0.09307	-0.12777	0.17161	0.244745	0.167335	-0.090865	0.31541	-0.030055	-0.335055	-0.257395	-0.170425	0.023585	0.16495	0.03452	-0.23062	-0.48914	-0.7909	-0.456645	-0.10006	-0.480815	0.17594	-0.492885	0.10537	-0.062845	0.179215	0.175575	-0.844255	-0.070675	-0.33939	-0.15701	-0.10859	-0.34061	-0.32639	-0.133395	-0.02512	-0.685065	0.054815	0.55681	0.02181	0.05334	-0.1671	-0.071735	0.22661	-0.05584	-0.395805
YLR383W	-1.0309	-0.68465	-0.9156	-0.71286	-0.97592	-0.61537	-0.93171	-1.07282	-0.699805	-0.693015	-0.91696	-0.760565	-0.539705	-0.132255	-0.778595	-0.640915	-0.76007	-0.67564	-1.10671	-0.75162	-0.36331	-0.603105	-0.82579	-0.518555	-1.19813	-0.738505	-0.8919	-0.851915	-1.08784	-0.655475	-0.204115	-0.478575	-0.61227	-0.84267	-0.97011	-0.65136	-1.33937	-0.925515	-0.83511	-0.416875	-0.815605	-1.20572	-1.25563	-0.53094	-1.04698	-0.409805	-1.37528	-1.46579	-0.672395
YDR140W	-0.5085	-0.63966	-0.23722	-0.46393	-0.34126	-0.84179	-0.43719	-0.892355	-0.663505	-0.545435	-0.5338	-0.572195	-0.878275	-0.610115	-0.586255	-0.412905	-0.9272	-0.74701	-0.34353	-0.61463	-0.88676	-0.751775	-0.79858	-1.05648	-0.72284	-0.746705	-0.77209	-0.486005	-0.748615	-0.593065	-0.828935	-0.604505	-0.72649	-0.28741	-0.61694	-0.80422	-0.61513	-0.932595	-0.42078	-0.966065	-1.00087	-0.93573	-0.69731	-0.72645	-0.62833	-0.715915	-0.60867	-0.60203	-0.826915
YJL062W	0.01456	0.02283	0.00717	-0.06176	0.15367	-0.25682	0.57842	0.764615	0.657455	0.546105	0.64169	0.547335	0.121865	0.161805	0.121635	0.460705	0.46289	0.33538	0.10061	-0.26885	-0.05929	0.189825	0.39479	0.132685	0.46458	-0.255745	0.52551	0.442785	-0.426235	0.266025	-0.235075	0.118775	0.02843	-0.26875	-0.03423	-0.17293	0.16085	-0.243395	0.42925	-0.020545	0.411205	0.80172	0.05747	0.27366	-0.05744	0.134545	0.28877	0.09149	0.271405
YNL252C	0.24636	0.22648	0.22434	0.18526	0.30227	0.52186	-0.25742	-0.276425	-0.240645	0.028505	0.15782	-0.211765	0.144625	-0.087945	-0.089035	-0.140305	0.067	-0.23705	-0.39651	-0.18387	0.24444	0.285885	-0.00962	0.545815	0.33101	0.094875	-0.54767	0.103995	-0.137485	-0.069535	0.299925	-0.340525	-0.20307	0.30678	-0.2659	-0.18845	-0.20263	0.165615	-0.3861	0.251545	-0.214995	-0.27737	-0.27987	0.00782	0.19125	-0.030855	-5e-05	0.28013	-0.200315
YLR048W	-2.7106	-2.8092	-2.84491	-2.73294	-2.53789	-2.89681	-1.0315	-1.20589	-1.25462	-0.922635	-1.20591	-1.0678	-1.07987	-0.902625	-1.08491	-0.621385	-0.89578	-0.88818	-2.22313	-3.01998	-2.378	-1.94405	-1.83639	-1.48738	-1.04015	-2.12455	-1.672	-2.5367	-2.73354	-1.84879	-1.54713	-1.4874	-1.70615	-1.29933	-2.2794	-2.2565	-1.30065	-1.85068	-1.7987	-1.20694	-1.55509	-1.3119	-1.79358	-1.18137	-2.66409	-2.08583	-1.20857	-2.188	-2.0093
YGR282C	-0.54014	-0.35513	-0.35569	-0.13027	-0.144	-0.43266	-0.01696	0.197815	0.125915	-0.100415	0.09655	0.109455	-0.149735	-0.059295	-0.091515	0.146495	0.26369	0.21805	-0.31821	-0.43234	-0.6244	-0.333415	0.11764	-0.323675	-0.22035	-0.398875	0.09304	0.092015	-0.505645	-0.156025	-0.553065	-0.450705	-0.42167	-0.45592	-0.21449	-0.49407	-0.26798	-0.359645	-0.18374	-0.340285	-0.342525	0.58078	-0.33462	0.09791	-1.18571	-0.574685	0.08451	-0.03382	-0.426515
YEL033W	-0.93786	-1.5622	-1.4006	-1.44449	-2.51908	-1.62263	-0.29348	-2.13028	-0.497715	-0.901875	-0.73022	-1.38682	-0.711665	-1.89807	-0.626065	-1.23917	-1.61866	-2.41955	-0.97605	-1.62586	-0.99339	-0.872955	-1.60733	-2.02244	-0.49122	-1.51293	-0.88869	-1.55272	-0.681445	-1.6751	-1.56302	-1.76229	-0.95342	-1.29902	-1.45224	-1.56934	-0.88491	-1.5413	-1.48148	-1.83699	-0.824265	-1.29414	-0.8075	-0.70204	-0.7254	-1.67905	-1.74429	-1.71483	-1.28893
YMR196W	4.63511	4.52712	4.76801	4.5406	4.99302	5.15961	5.83228	5.77304	5.84868	5.71072	5.17808	5.67089	4.57249	5.22889	5.00619	4.87939	5.04789	5.49038	4.7796	4.91181	5.16726	4.20089	3.7363	4.56783	4.10799	3.39546	4.53904	4.05896	4.44323	4.55405	4.27004	4.64116	4.88521	4.29868	4.90098	4.55255	4.37309	4.12929	4.46452	4.3671	4.6628	4.34278	5.03353	3.90653	4.82289	4.73421	4.39567	2.97655	5.65695
YOR205C	-0.72817	-0.90926	-0.97893	-1.36607	-0.50076	-0.95149	-0.67692	-1.27988	-1.04455	-0.907245	-0.76572	-1.01389	-0.297905	-0.705155	-0.772435	-0.486495	-0.6922	-0.62728	-0.77826	-1.09789	-0.68747	-0.884155	-0.89611	-0.526945	-1.10479	-1.15386	-1.19536	-1.02516	-1.30558	-1.30462	-1.33876	-1.18311	-0.80543	-0.89285	-1.13627	-1.23928	-0.63812	-1.00825	-0.91801	-0.849275	-1.21501	-1.00723	-1.4013	-0.76838	-1.06655	-1.33553	-1.14802	-1.46623	-0.948225
YBR188C	-0.23759	-0.34802	-0.6575	-0.75896	-0.18282	-0.48976	-0.17439	-0.983905	-0.101365	-0.072985	-0.07534	-0.164655	0.205895	-0.485425	-0.349465	-0.182825	-0.41179	-0.33824	-0.39643	-0.63671	0.31495	-0.067485	-0.14661	-0.296865	-0.33565	-0.014685	-0.526	0.210865	-0.512075	-0.140065	0.434785	-0.409305	-0.40297	-0.53304	-0.18373	-0.45087	-0.55264	-0.343735	0.05625	-0.013245	-0.323985	-0.49002	-0.68133	-0.18145	0.07372	0.143105	-0.2762	-0.54747	-0.433875
YER056C	-2.87484	-3.15667	-2.59771	-2.65956	-2.26615	-2.92714	-2.99133	-3.12568	-2.61477	-3.38586	-3.03662	-3.04124	-3.0819	-3.27915	-3.12621	-2.79214	-3.00463	-3.23089	-2.59007	-3.32018	-3.23941	-2.98618	-2.15315	-2.21014	-2.16967	-2.6641	-2.82404	-3.05995	-2.92229	-2.62412	-3.45058	-2.81523	-3.14111	-2.43823	-2.50353	-2.7293	-2.63391	-2.74704	-2.35353	-2.80938	-3.25805	-2.03155	-2.92376	-2.5987	-3.19049	-3.48318	-2.68925	-3.55003	-3.26863
YLR299W	0.83341	1.01244	1.00881	1.10603	1.18152	1.20954	1.97929	1.71652	1.4994	1.6623	1.84703	1.86088	1.99822	2.47288	2.16052	1.58184	2.25482	2.54903	0.90449	0.85574	0.76735	0.721535	1.50774	1.41561	1.17876	0.863495	0.8043	0.443445	0.461555	0.729485	1.20009	1.34296	1.33366	0.96583	1.45825	1.60151	0.94532	0.814685	1.5586	1.34956	1.03388	1.46722	0.77079	0.8375	0.85595	0.841985	0.82402	0.36965	1.14749
YHR178W	0.0773	0.12924	0.27454	0.2494	0.00662	0.04438	0.16159	0.076515	0.296575	0.330515	0.10925	0.207725	-0.052045	0.166025	-0.034025	0.168735	-0.08944	0.10331	0.36516	0.42963	-0.3608	0.094355	0.15856	0.255255	0.03295	0.185285	0.11795	0.180115	0.322565	-0.039685	-0.342825	0.334075	-0.05926	0.15958	0.08319	0.35323	0.15479	0.223005	0.14955	0.088385	0.201395	0.45381	0.01572	0.23451	0.2108	0.148815	0.06189	0.38877	-0.026025
YOR195W	-1.24939	-0.77041	-1.40171	-0.74837	-1.94119	-0.90259	-1.64585	-1.88311	-1.45399	-0.969665	-1.171	-1.30468	-1.1033	-1.16776	-1.46236	-1.20213	-1.64551	-1.58165	-1.78693	-1.16974	-0.67125	-1.15141	-1.08578	-1.0431	-1.8901	-0.905535	-1.62339	-1.49474	-1.02733	-0.899645	-0.210515	-1.28547	-1.12598	-0.80983	-1.31111	-0.84918	-2.26242	-1.08461	-1.22218	-0.874075	-1.22313	-1.7571	-1.53855	-0.48018	-1.41797	-0.938845	-2.41522	-2.27303	-1.22179
YER114C	-0.62354	-0.68894	-0.54507	-0.83169	-0.69557	-0.71672	-0.29671	-0.357345	-0.172765	-0.369975	-0.49698	-0.269145	-0.666065	-0.826745	-0.734095	-0.598815	-0.70324	-0.61622	-0.61134	-0.62405	-0.68093	-0.638495	-0.29836	-0.401035	-0.62516	-0.500205	-0.70704	-1.04493	-0.683325	-0.458205	-0.488145	-0.343475	-0.38248	-0.40735	-0.8779	-0.79879	-0.3973	-0.167235	-0.34263	-0.653255	-0.483155	-0.30364	-0.38401	-0.3485	-0.63599	-0.530265	-0.22993	-0.37657	-0.664215
YOR192C-C	1.10297	0.94701	0.7985	0.78087	0.55968	1.01732	0.6765	0.244145	0.194565	0.509535	-0.33742	-0.142585	0.520495	0.241115	0.133545	0.100335	0.57735	0.26453	0.69619	0.56445	1.14584	1.21951	0.26112	0.348795	-0.11424	0.041645	0.44774	-0.100725	0.568315	1.69318	0.188955	0.131735	0.2036	0.08965	1.20881	1.03074	0.24487	0.376185	0.25113	0.651985	0.549225	0.14149	0.10757	0.95626	1.92333	1.71599	0.15546	1.39627	0.331015
YJL191W	-2.28416	-1.8471	-2.416	-1.54447	-2.16489	-1.77008	-0.63906	-1.09997	-1.46504	-0.847155	-0.85352	-0.972725	-0.992725	-0.776855	-0.899635	-0.515855	-0.93494	-0.94921	-1.38645	-1.87507	-1.44973	-1.45348	-1.08102	-1.29398	-0.84925	-1.50819	-1.82223	-2.64954	-1.49168	-1.80554	-2.26401	-1.60421	-0.947	-1.49726	-1.57017	-1.46872	-1.18827	-1.59482	-0.65461	-0.972625	-1.18322	-1.07459	-1.46547	-1.39192	-2.27849	-2.0654	-1.4376	-2.20723	-1.58647
YGL258W	0.25247	-0.31552	0.43209	0.21974	-0.16089	0.11772	0.83615	1.04506	-0.289315	0.094365	-0.22154	1.09756	-0.364795	-0.217585	-0.549755	-0.339585	0.94868	-0.20609	0.75092	0.54675	1.78171	0.964465	0.36655	0.221895	0.1	0.231225	0.5467	0.905205	1.12957	0.408485	0.359565	0.711445	1.20789	-0.21331	1.1684	0.63807	0.89287	0.174355	0.50997	0.435045	1.10759	0.49808	0.92825	0.69746	0.44123	0.175165	0.79373	-0.28578	0.929635
YIL002C	-0.27997	-0.4251	-0.42764	-0.36548	-0.27148	-0.27228	0.00269	0.195175	-0.234595	0.023025	-0.17697	0.026295	0.101525	0.334935	0.058965	0.103625	-0.04028	0.13156	-0.26912	-0.16066	-0.16828	-0.054085	-0.38292	0.067045	-0.33561	-0.168695	-0.48167	-0.546885	-0.583275	-0.607685	-0.453125	0.023745	-0.37963	-0.17596	-0.49905	-0.2702	-0.37563	-0.248875	-0.37102	-0.113835	-0.355955	-0.51828	-0.57944	-0.0277	-0.50334	-0.386275	-0.53066	-0.62816	-0.535475
YDR518W	1.13259	1.2774	1.18821	1.61406	1.46935	1.39644	1.55148	1.87698	1.84127	1.61115	1.4894	1.72653	1.60357	1.89166	1.85972	1.78211	1.54805	1.77027	1.04416	1.13213	1.0666	1.4895	0.92681	1.04757	0.55998	0.555765	2.39198	2.04276	0.788285	1.86285	0.743875	1.32281	0.63715	0.53335	0.84391	0.62966	0.9298	0.844985	0.59263	1.1547	1.05011	1.01144	1.57261	1.589	1.21825	1.73171	0.8612	1.26508	1.77365
YKR021W	0.45044	0.24901	0.43533	0.27636	0.44929	0.44065	0.62667	0.597315	0.162125	0.500615	0.49507	0.491345	0.286745	0.487965	0.462095	0.444035	0.48002	0.54022	0.53978	0.25902	0.34306	0.574805	0.40304	0.524365	0.28273	0.078785	0.38771	0.076335	0.297965	0.033135	0.186355	0.445535	0.30406	0.26196	0.24293	0.22328	0.53872	0.380675	0.2904	0.312985	0.297935	0.1998	0.13204	0.06623	0.44388	0.172535	0.34176	0.37515	0.339505
YLR328W	-0.80813	-0.87141	-0.89533	-0.95798	-0.61314	-1.04707	-0.9208	-1.0131	-1.29734	-1.24652	-1.19588	-0.995095	-1.43917	-1.40609	-1.19274	-1.02231	-1.55513	-1.23703	-0.98709	-1.25492	-1.85453	-1.4485	-1.21934	-1.44578	-1.05154	-1.2027	-0.83447	-1.22606	-0.979965	-0.948435	-1.14312	-0.520735	-1.10089	-0.80785	-1.02465	-0.96283	-0.92902	-0.967615	-1.11063	-1.20758	-1.03388	-0.95324	-0.63229	-0.43726	-1.32101	-0.849645	-1.37125	-0.98652	-1.3493
YKL173W	-0.61849	-0.77364	-0.80964	-0.68541	-0.49996	-0.70964	-0.69495	-0.662165	-0.841465	-0.913415	-0.9766	-0.709375	-0.498575	-0.259625	-0.399825	-0.407145	-0.34403	-0.29712	-0.61404	-0.49379	-0.74098	-0.718055	-0.69701	-0.660645	-0.87915	-0.829535	-1.05681	-0.932985	-0.837795	-0.550175	-0.937075	-0.720625	-0.69762	-0.64815	-0.73374	-0.91274	-0.73326	-0.833615	-0.68639	-0.919095	-0.839295	-1.01787	-0.86421	-0.64885	-0.82534	-0.560525	-0.85176	-0.70108	-0.770075
YBL003C	-0.20207	-0.42818	-1.24228	-0.2913	-0.39094	-0.55339	-0.70993	-1.19687	-0.866595	-0.647545	-0.82674	-0.629725	-0.859455	-1.13468	-1.00506	-1.11401	-1.43819	-1.18606	-0.43365	-0.41984	-1.17618	-1.08817	-0.96948	-0.688895	-0.7783	-0.470345	-1.38692	-0.805005	-0.686555	-0.792315	-0.361205	-0.545295	-0.57488	-0.61903	-0.65132	-0.55317	-0.92798	-0.615155	-0.67004	-0.567895	-1.04946	-1.70616	-0.34374	-0.9483	-1.4609	-1.04174	-1.30548	-1.24522	-1.11505
YNR013C	-0.22387	-0.21519	-0.47707	-0.38015	-0.06329	-0.29576	0.40132	0.225285	0.566525	0.170725	0.38642	0.263005	0.142415	-0.071565	-8.5e-05	0.183735	0.09416	0.12002	-0.37024	-0.82931	-0.35183	-0.396105	0.13064	-0.310995	0.79662	-0.111965	-0.0336	-0.752165	-0.586255	-0.091945	-0.569645	-0.305965	0.45563	0.22986	0.04504	-0.19987	0.26598	0.032295	0.50126	0.025515	0.251805	0.53798	-0.08198	0.04304	0.31402	-0.088065	0.11313	-0.41522	0.583085
YJR077C	-0.88726	-0.77592	-0.90505	-0.55566	-0.72573	-1.13567	-0.56433	-0.789305	-0.374795	-0.736145	-0.27863	-0.822755	-0.638185	-0.632705	-0.879085	-0.492095	-0.44062	-0.53599	-0.79816	-1.15691	-0.96906	-0.738645	-0.46085	-0.942265	0.21587	-0.501395	-0.9878	-1.42548	-0.746965	-0.727355	-1.17483	-1.21986	-0.56003	-0.43554	-0.65492	-1.1594	-0.34759	-0.704005	-0.2357	-0.653975	-1.10458	-0.08478	-0.70238	-0.69357	-1.53551	-0.997335	-0.76269	-1.55498	-1.11511
YDR376W	-0.26114	-0.01214	-0.05182	0.15589	-0.27125	-0.47898	0.24949	0.622295	0.345755	-0.138155	0.16736	0.234085	-0.204635	-0.092235	-0.081305	0.074745	0.19243	0.1272	-0.01819	0.08842	-0.32094	0.371615	-0.02093	-0.283875	-0.08666	0.307305	-0.14579	0.114345	0.263465	0.053095	-0.830895	0.226405	-0.02335	0.16632	0.15744	0.14135	0.22	0.263145	-0.10169	-0.379575	-0.160555	0.2276	-0.01889	0.37046	-0.09417	0.089395	0.02604	-0.02249	-0.405155
YJL120W	-0.031	0.18176	-0.43785	-0.14861	-0.59765	-0.31367	-0.11156	-0.105955	0.204385	-0.386285	-0.0188	-0.066195	-0.729315	-0.086175	-0.223905	-0.015795	-1.01633	-0.27701	-0.27241	-0.10941	1.09262	0.404105	0.4288	0.055705	1.13416	0.451065	0.18834	0.877485	0.121455	0.743125	0.219635	0.967145	0.04017	-0.01362	0.12989	0.29224	0.60468	-0.175235	0.1007	0.370865	0.572165	0.62409	0.11234	-0.52334	0.35426	0.589615	0.10387	0.1769	0.854845
YPR078C	-0.35106	0.13315	-0.42164	-0.12399	-0.26573	-0.28144	-0.43039	-0.856865	-0.546395	-0.393725	-0.77703	0.266945	-0.722605	-0.455195	-0.586245	-0.858835	-0.59503	-0.39897	0.34458	0.43529	-0.04136	0.624405	-0.0766	0.319825	-0.1845	-0.171115	0.19114	0.469965	0.570435	0.306165	0.144635	0.227495	0.19606	0.6317	-0.13136	0.16394	0.34946	0.325135	-0.14078	0.407805	0.023545	0.70686	-0.22375	0.25798	-0.27966	0.156165	0.26274	0.31594	0.546175
YGL058W	0.725	0.66223	0.50432	0.81127	0.49071	0.30135	0.16359	0.065235	0.161305	0.066925	0.07542	-0.003305	0.732195	0.250795	0.631175	0.378965	0.60489	0.70904	0.51811	0.49446	-0.07757	-0.167205	-0.18795	0.001315	-0.08672	0.025525	-0.14102	0.619405	0.542955	0.622425	0.289165	0.387595	0.13034	0.17792	0.58952	0.65183	0.03163	0.401975	-0.23773	-0.060105	0.154255	-0.47823	0.45965	-0.25219	0.70884	0.307805	0.10742	0.08783	0.167925
YFL005W	0.16827	-0.06758	-0.0912	0.04235	-0.02011	0.0031	-0.03281	0.229685	-0.103925	-0.368625	-0.43857	-0.222465	-0.281035	-0.015675	-0.125805	-0.323975	-0.22772	-0.6331	-0.23977	-0.07857	-0.38151	-0.268375	-0.42516	-0.094705	-0.28247	-0.348925	-0.13401	-0.471645	-0.004275	-0.111835	-0.429565	0.098845	-0.12051	-0.19613	0.0011	-0.03228	0.00648	0.098075	-0.45827	-0.179275	-0.040805	-0.25502	0.00395	-0.34434	-0.15425	-0.319455	-0.15059	-0.29044	-0.132235
YMR284W	0.86633	0.42635	0.75057	0.61014	0.54742	0.96715	0.83098	1.03408	0.719885	1.55967	1.09373	0.991305	1.23487	1.52401	1.30607	1.1624	1.02296	1.04463	0.91929	0.77928	0.66131	0.451595	0.5052	0.726125	0.60348	0.841715	0.41554	0.715035	0.502385	0.452485	1.46602	1.10919	0.5067	0.94844	0.64628	0.89179	0.19658	0.426175	0.42014	0.889345	0.680005	0.20083	0.2905	0.25751	0.85808	0.744765	0.1688	0.83235	0.355045
YML061C	-0.43296	-0.33775	-0.44763	-0.56751	-0.33932	-0.5098	-0.83412	-0.620185	-0.643375	-0.894285	-0.83147	-0.675385	-0.323205	-0.010025	-0.153375	-0.301605	-0.075	-0.40794	-0.68986	-0.5066	-0.37361	-0.592435	-0.38113	-0.622875	-1.11891	-0.586395	-0.95962	-0.695045	-0.919465	-0.426705	-0.716285	-0.996945	-0.97335	-0.05311	-0.77695	-0.62069	-0.90003	-0.705765	-0.43455	-0.732125	-1.13267	-0.89228	-1.0899	-0.49918	-0.98366	-0.637265	-1.06483	-1.03192	-0.749745
YJL139C	-0.33809	-0.42109	-0.18016	-0.28351	0.0721	-0.31426	0.21275	-0.083105	-0.060705	-0.257835	0.08161	-0.111855	-0.108475	-0.222015	-0.136335	-0.060555	-0.25312	-0.05836	-0.26252	-0.64191	-0.11151	0.382595	-0.07703	0.029055	0.22097	-0.243525	-0.02656	-0.367695	-0.546565	-0.241095	-0.563785	-0.219265	-0.05748	-0.57994	-0.41942	-0.52537	-0.16706	-0.433435	-0.14005	-0.299715	0.220035	0.08768	-0.23066	-0.47273	-0.21576	-0.214065	-0.04673	-0.02908	-0.121755
Q0045	0.04436	0.41337	0.11999	0.5624	0.02706	0.27589	0.46615	0.842995	0.804245	0.444975	0.25185	-0.065995	0.299145	0.610465	0.476335	0.442125	0.35138	0.22985	-0.33303	0.24481	-0.24161	0.303505	-0.17529	-0.103995	-0.05457	0.669055	0.00359	-0.049085	0.294385	0.109855	-0.561845	-0.042665	0.18254	-0.06404	-0.20148	-0.29867	0.16516	1.19565	0.20625	-0.118415	-0.296405	-0.0378	0.31312	0.7482	-0.80998	0.386525	-0.31053	0.4879	0.278785
YDL129W	-1.29923	-1.16361	-1.0697	-1.17772	-1.3249	-1.51871	-1.66077	-1.99418	-1.58074	-1.95094	-2.2567	-1.77536	-2.6132	-2.40422	-2.5277	-2.24995	-2.64997	-2.0083	-0.98022	-1.20391	-1.71443	-1.10058	-1.25695	-1.87027	-1.28172	-0.892875	-1.96457	-1.52445	-1.04781	-1.30466	-1.73511	-1.4407	-1.29148	-1.07902	-1.32703	-1.40354	-0.93459	-0.945495	-1.31762	-2.2204	-1.61549	-0.77638	-1.45109	-0.98888	-1.72111	-1.62403	-1.94273	-1.20828	-1.81017
YLR449W	-2.56187	-2.34587	-2.40046	-2.27451	-2.74791	-2.60595	-3.00494	-3.958	-2.55451	-3.03287	-3.04208	-2.91773	-2.14243	-2.85696	-2.57096	-2.32478	-2.52225	-2.77918	-2.87273	-2.86813	-2.79655	-2.84637	-2.27008	-2.59226	-3.0846	-2.4872	-2.77405	-3.20366	-2.30077	-2.35269	-2.21408	-2.98727	-2.82906	-2.50297	-2.74452	-2.57279	-2.93695	-2.74053	-2.55705	-2.73101	-2.52361	-2.28307	-2.3302	-1.59222	-3.07802	-2.28986	-3.13424	-3.21573	-2.7697
YAL037C-B	-0.10793	-0.32496	-0.28609	0.0824	0.41098	-0.05115	-0.04415	0.553895	0.112685	-0.527255	0.17432	-0.174005	-0.523105	0.493545	0.376465	-0.057365	0.06877	-0.33992	0.61264	0.25166	0.04293	0.151245	0.56511	0.369085	-0.1216	0.259095	0.18795	0.190835	0.285105	0.047585	0.497505	0.470495	0.11017	0.59158	0.47012	0.18098	0.29358	0.461935	0.47431	0.057185	0.492805	0.27659	0.64473	0.29328	0.30544	0.401275	0.48329	0.65986	0.475695
YLR021W	-0.33683	-0.27553	-0.21062	-0.2683	-0.5497	-0.3893	-0.72839	-0.615435	-0.434915	-0.348175	-0.31473	-0.405145	-0.543405	-0.551955	-0.377285	-0.406465	-0.48404	-0.84644	-0.28792	-0.27923	-0.52272	-0.620705	-0.45479	-0.492375	-0.86121	-0.548415	-0.6482	-0.062705	-0.285415	-0.122235	0.129025	-0.728215	-0.58047	-0.6513	-0.36379	-0.39201	-0.74019	-0.546955	-0.46456	-0.447445	-0.389295	-1.12201	-0.44837	-0.67115	-0.19107	-0.550145	-0.76748	-0.47419	-0.470845
YDL007W	0.78096	0.68695	0.71434	0.54965	0.72857	0.81851	0.66916	0.590575	0.910515	0.801065	1.07345	1.01754	1.27442	1.16013	1.16999	0.656005	1.26535	1.07976	0.08532	0.54681	0.76306	0.125625	0.361	0.870655	0.2323	0.522195	-0.11295	0.044085	0.122135	0.672385	1.45731	0.757735	0.17171	0.37808	0.38113	0.65367	-0.29051	0.368655	0.63244	1.07964	0.222495	-0.42572	0.57667	0.37428	0.63895	0.485905	0.23889	-0.30125	0.262185
YKR069W	-0.69356	-0.48107	-0.30872	-0.44782	-0.10112	-0.02675	-1.43494	-1.24575	-1.25154	-1.1802	-1.41633	-0.962485	0.096015	0.397715	-0.115075	-0.036995	0.18056	-0.02448	-1.74762	-2.05376	-0.65627	-1.37911	-0.46906	-0.282715	-0.98252	-0.594555	-1.94972	-2.32472	-1.49225	-0.309445	-2.30952	-2.35684	-2.03717	-1.46457	-1.80284	-1.75846	-0.74533	-0.722615	-0.41042	-0.407705	-0.975265	-0.57689	-1.0808	-1.01292	-2.49339	-0.301315	-1.21848	-1.04749	-0.767845
YOR145C	-2.92759	-3.07489	-2.9205	-2.71853	-3.13939	-3.29467	-3.37483	-3.77846	-2.86869	-3.55472	-3.52987	-2.86253	-3.3329	-3.65815	-3.37148	-2.79063	-3.38745	-3.83091	-2.5624	-3.21394	-3.4922	-2.9358	-2.71776	-3.1673	-3.0895	-2.549	-3.17713	-2.95223	-3.00258	-2.42057	-2.60873	-2.96583	-3.52953	-1.8837	-2.9004	-2.85833	-2.59387	-2.96596	-2.58339	-3.26971	-2.99618	-2.6619	-2.83503	-2.43006	-3.46384	-3.29805	-3.09886	-4.07869	-3.69514
YMR317W	-0.31228	0.53234	-0.17249	0.33309	-0.25308	-0.00589	0.41409	0.491255	0.786815	0.964185	0.27446	0.907255	-0.086155	0.064405	0.066025	1.28002	-0.14217	0.31883	-0.59991	-1.02917	0.34377	0.655325	-0.60768	-0.179565	0.30181	0.723835	1.14297	2.13578	0.441695	-0.611585	-0.410835	-0.108335	0.41201	0.46953	-0.41974	0.19607	0.33774	0.245475	-0.86371	-0.008365	-0.232245	0.00511	0.84926	1.68027	0.09046	-0.385835	-0.1534	-0.13783	0.473215
YOR287C	-3.5791	-2.13902	-3.11704	-2.93339	-3.68645	-2.87988	-2.96302	-3.56026	-2.39764	-2.8085	-2.20388	-2.86402	-2.55592	-2.50984	-2.80265	-2.23752	-2.97068	-3.2475	-3.446	-2.87648	-2.22842	-2.73251	-1.76505	-2.10475	-2.48749	-1.64559	-2.72274	-1.88284	-3.20469	-2.27658	-1.12058	-2.61526	-2.68336	-2.67327	-2.99597	-2.20423	-2.9703	-2.54162	-2.58307	-2.26038	-3.16019	-2.1702	-3.02088	-2.13786	-2.72906	-2.7048	-3.23143	-3.14327	-2.69584
YHR071C-A	-0.98291	0.3605	-0.6596	-0.82739	-0.66894	-0.4732	-0.78497	-0.701925	0.057705	-0.915355	-0.61797	-0.565365	-0.917295	-0.324505	-0.504745	-0.018425	-0.88276	-0.66373	-0.11855	-0.19847	-0.45489	0.039715	-0.18578	-0.671675	-0.19911	-0.653405	-0.58301	-0.161465	0.192425	0.390475	-0.760185	0.023405	0.12824	0.52473	-0.3208	0.01341	-0.00861	-1.36457	-0.59206	-0.121595	0.132615	0.24541	0.2591	-0.1506	0.00751	-0.074235	0.10945	-0.48294	-0.050435
YIL122W	0.0008	0.16128	-0.17939	-0.30807	0.03021	0.64233	-0.39918	-0.246295	-0.064735	0.177215	-0.02942	0.004375	0.187705	0.116535	0.340045	0.221545	-0.02492	0.14947	-1.09815	-0.77299	0.2029	0.036915	-0.29736	-0.120545	0.48626	0.520165	-0.68066	-1.09794	-1.02123	-0.134895	-0.030185	-0.321515	-0.09358	0.12467	-0.54513	-0.23114	0.2925	0.247115	0.13999	0.237995	-0.164835	0.1798	-0.31011	0.00765	-0.39179	0.053025	0.50701	0.57461	-0.059105
YPL218W	-0.02704	-0.03465	0.02944	0.11422	0.08244	-0.21362	0.27324	-0.084225	-0.060975	-0.037435	0.00891	-0.120255	-0.061385	0.035085	0.217065	0.034005	0.39992	0.17441	-0.17989	-0.19165	-0.2422	-0.057105	-0.04951	-0.385375	0.31528	-0.221955	0.30862	0.017385	-0.103345	0.315765	-0.592065	-0.367505	-0.059	-0.42209	0.08083	-0.24111	0.04187	-0.211335	0.09829	-0.281205	-0.183255	0.3543	0.07413	0.23397	-0.23784	-0.176755	-0.13225	-0.16027	-0.056025
YGR296C-B	-0.6098	-0.62402	-0.36003	-0.66024	0.13306	-0.96901	0.43044	-0.038465	0.671505	0.498885	0.12017	0.219115	-0.611245	-0.209575	-0.616465	-0.350235	-0.24531	-0.21463	-0.66726	-1.00628	-0.33048	-0.208295	0.15304	0.042795	0.63898	-0.499175	0.10928	-1.07322	-0.837035	-1.10711	-0.989115	-0.859405	0.45668	0.92212	-0.42621	-0.33497	0.80962	0.060325	0.73253	0.297465	-0.605345	0.096	-0.06237	-0.43311	-0.13411	-0.962295	0.02397	-0.24542	0.021785
YJL145W	-1.30974	-1.64006	-1.46957	-1.49132	-1.40064	-1.53814	-1.43346	-1.71978	-1.59783	-1.6467	-1.56044	-1.63685	-1.28245	-1.31744	-1.15006	-1.57367	-1.13351	-1.69885	-0.91688	-1.66846	-1.53814	-1.38983	-1.4835	-1.74798	-1.92241	-1.57183	-1.57597	-1.90345	-1.31119	-1.20911	-0.843165	-1.51307	-1.46076	-0.9378	-1.516	-1.57281	-0.93557	-1.85166	-1.67588	-1.66132	-1.51811	-1.8235	-1.34675	-1.37376	-1.72082	-1.56492	-1.66304	-1.33741	-1.52995
YLR080W	1.86064	1.36291	1.76147	1.60374	1.86297	2.32458	1.98197	1.96894	2.22203	2.20575	2.2724	2.19175	1.96626	1.82353	1.67467	1.79371	1.28228	1.30795	1.22858	1.74835	2.36182	1.85708	1.46055	2.16127	1.6456	1.55309	1.87583	1.83925	0.674735	1.68247	2.09502	1.91946	1.88465	1.9184	1.72293	2.09013	1.18121	1.43986	1.17813	1.79744	1.72611	1.39326	1.30743	1.53593	1.74945	1.56367	2.03913	1.41606	1.70991
YPR037C	-0.2489	-0.53587	-0.40048	-0.26931	-0.085	-0.70787	-0.22808	-0.319735	-0.141615	-0.494845	-0.16535	-0.607845	0.144745	-0.165345	-0.204995	0.008855	-0.12953	-0.23339	-0.52943	-0.78626	-0.09105	-0.531695	-0.18386	-0.336575	-0.43716	-0.559255	-0.47734	0.072765	-0.824435	-0.032745	-0.403965	-0.637515	-0.73121	-0.38336	-0.52154	-0.617	-0.44391	-0.713435	-0.23973	-0.293065	-0.803225	-0.63487	-0.29475	-0.24278	-0.82317	-0.606915	-0.39665	-0.94928	-0.289465
YJR149W	0.04995	0.11072	-0.30053	-0.36092	0.3524	0.12424	0.53125	0.494065	0.120755	0.731105	0.55875	0.722095	0.402345	0.548315	0.453165	0.498045	0.62934	0.81682	-0.0688	-0.39142	0.32206	0.305625	0.28549	0.665175	-0.2641	-0.612075	0.52803	-0.606685	-1.05764	0.111785	0.634175	0.996715	0.50172	0.54851	-0.61691	-0.0663	0.79167	0.366975	0.20866	0.118165	0.807865	0.7063	-0.6492	-0.02767	0.58896	0.394855	-0.48392	0.05915	0.616695
YKL036C	-0.02656	-0.67099	-0.28419	-0.16526	-0.35364	-0.43296	-0.18101	-0.825005	-0.109765	-0.124595	-0.18712	0.068905	0.039305	-0.222425	-0.229685	-1.42146	-0.2921	-0.2464	0.41893	0.01754	-0.02301	0.152495	0.2968	0.309405	-0.29639	0.133975	0.20738	0.198455	-0.260275	0.125035	-0.311575	0.557135	0.31392	0.30602	0.42867	0.34318	0.6808	-0.048125	0.34247	0.042405	-0.020225	0.18852	0.55907	-0.86837	-0.31557	-0.531345	0.17657	-0.28085	0.096555
YNR052C	0.14448	-0.17222	0.40307	0.01787	0.14449	0.21717	0.16051	-0.178395	0.083465	0.299495	-0.04479	0.142815	0.374455	0.072895	0.398285	0.341065	0.20673	0.28676	0.28415	-0.26664	-0.09849	-0.194795	-0.02867	-0.157985	-0.21299	-0.402035	0.03063	-0.293615	0.045995	-0.201505	0.027795	-0.289845	-0.05702	-0.0634	-0.26582	-0.03862	-0.00064	-0.173115	0.07747	-0.146615	0.308245	0.08762	-0.31833	-0.20645	0.11877	-0.297565	0.20726	-0.30315	-0.078705
YPR198W	-0.31774	-0.05854	-0.03363	0.01994	-0.1532	-0.15187	0.53446	0.596465	0.603575	0.487375	0.55062	0.470265	-0.254345	-0.106995	-0.229925	-0.090465	-0.09504	-0.1222	-0.40812	-0.67731	-0.36461	-0.017355	-0.06351	-0.406275	0.26887	-0.263605	0.30885	0.233135	-0.168675	0.455815	-0.767255	-0.164675	-0.09154	-0.11232	-0.04766	-0.26564	0.03332	-0.065275	0.1853	-0.544675	-0.290865	0.49786	-0.17334	0.42946	-0.44245	0.192535	-0.13041	-0.09721	-0.297165
YHR098C	0.21849	0.32242	0.23596	0.17684	0.25872	0.15619	0.51297	0.744825	0.309435	0.346765	0.21103	0.532465	0.554805	0.911665	0.703105	0.688245	0.54516	0.9391	0.43248	0.50812	0.07751	0.226485	0.22056	0.585945	0.24448	-0.324275	0.63069	0.023195	-0.047875	0.426185	0.136745	0.545545	0.31617	0.28279	0.41104	0.43611	0.47186	-0.107505	0.14919	0.366575	0.315135	0.12152	-0.0794	0.41029	0.03795	0.526595	0.2356	0.04392	0.098635
YLR173W	0.52673	0.78357	0.30235	0.90856	0.78149	0.66119	0.47186	0.712625	0.298195	0.329415	0.52171	0.487915	0.162475	0.816655	0.513415	0.756395	0.55858	0.49453	0.42782	0.48496	-0.01521	0.382645	0.36866	-0.000115	0.80389	0.855515	0.30312	0.427525	0.080545	0.536395	0.151055	0.388685	0.61173	0.36031	0.2222	0.2373	0.46374	0.136525	0.40703	0.213515	0.575145	1.01224	-0.01531	0.32566	0.26357	0.199025	0.89295	0.85792	0.349165
YMR314W	0.82502	0.34423	0.50475	0.50493	0.70573	0.40167	0.44954	0.538295	0.333185	0.484435	0.56707	0.617665	0.932615	1.10299	1.14478	0.751755	1.23868	0.84617	0.73215	0.41604	0.39461	0.062515	0.19451	0.599195	0.12551	0.251485	0.02519	0.186685	0.233715	0.496015	0.324965	0.488175	0.27356	0.09092	0.52799	0.64688	0.11959	0.242365	0.32277	0.628565	0.030735	-0.5135	0.41343	-0.28403	0.52805	0.326615	0.53566	0.13705	0.266205
YOR244W	0.23661	0.26392	0.09543	0.03844	-0.3865	0.34205	-0.06164	-0.150485	0.208915	0.069565	0.02114	-0.056105	0.135275	0.136815	0.032365	-0.053105	-0.20691	-0.15087	0.03318	0.17834	0.26011	-0.046575	-0.08289	0.036955	-0.12422	0.095315	-0.44255	0.110455	0.006265	0.223555	0.503875	-0.058815	0.00684	-0.1542	-0.14127	-0.06663	-0.2983	0.293865	-0.34023	0.146605	-0.373975	-0.57357	-0.12603	0.07489	0.23091	0.005335	-0.19312	-0.07049	-0.179065
YHR190W	0.12275	0.14184	0.19954	0.23778	0.12347	0.24417	0.79967	1.24849	0.445255	0.719825	0.59219	0.893435	0.398335	0.500915	0.530765	0.562875	0.95081	0.56024	0.35543	0.46249	0.02822	0.268045	0.14563	0.332795	0.14469	-0.006325	0.48257	0.252475	0.514595	0.343695	0.272975	0.427715	0.11686	-0.04998	0.26654	0.56721	0.13973	-0.076455	0.07409	0.288285	0.241755	0.22066	0.82739	-0.00372	0.18225	0.320965	-0.00877	0.0081	-0.058585
YPL097W	0.55617	0.38294	0.60332	0.4754	0.72833	0.57813	0.48078	0.621125	0.377135	0.510045	0.54023	0.397675	0.376885	0.384205	0.307005	0.389055	0.63273	0.29862	0.39717	0.29058	0.47104	0.640235	0.03654	0.491295	0.31004	0.501535	0.01866	0.390785	0.077465	0.185125	-0.350445	0.113115	0.19288	0.5607	0.36425	0.29374	0.27847	0.534045	-0.07229	0.261385	0.038665	0.23328	-0.17196	0.1248	0.15933	0.064195	0.18511	0.33641	0.246255
YLR103C	-0.78879	-0.81995	-1.14254	-0.78088	-1.09433	-0.60556	-1.22651	-0.945085	-1.14599	-1.04001	-1.30539	-0.911405	-0.536325	-0.549815	-0.633435	-0.496585	-0.74512	-0.82084	-0.85273	-0.68866	-0.72186	-0.615355	-1.01094	-0.542165	-1.44628	-0.788955	-1.3366	-0.617495	-0.516185	-0.461935	-0.375695	-0.701045	-1.39006	-0.88844	-0.94493	-0.53259	-1.48938	-0.723305	-0.78387	-0.729065	-0.969765	-1.35243	-1.26372	-0.55846	-1.0919	-0.869475	-1.38233	-0.93405	-1.01623
YNL115C	1.20398	1.27024	1.27974	1.21009	1.29253	1.50406	2.41915	2.77632	2.23725	2.38309	2.32747	2.6732	1.55878	1.77975	1.76927	1.699	1.80354	1.91005	1.49142	1.37028	1.74431	1.60825	1.69091	1.15159	1.5328	1.23118	1.53248	1.65613	0.857085	1.39695	2.02278	1.4626	1.51034	0.81557	1.14274	1.2295	1.28513	1.33403	1.20455	1.06862	1.6992	1.85836	1.17197	1.14434	1.24708	1.47236	1.73445	1.75804	1.21504
YBR112C	0.18565	0.28785	0.10699	-0.00751	-0.06794	0.24401	-0.91818	-0.803765	-0.578285	-0.914825	-0.93273	-0.736345	-0.709905	-0.902305	-0.765995	-0.699195	-0.90917	-0.75139	-0.4257	-0.38918	-0.63193	-0.622285	-0.38151	-0.485785	-0.65393	-0.419605	-0.56347	-0.756675	-0.203195	-0.355635	-0.515375	-0.740605	-0.0856	-0.59961	-0.37709	-0.27887	-0.86887	-0.663635	-0.31147	-0.577605	-0.731495	-0.46565	-0.28717	0.01267	-0.65414	-0.211795	-0.41824	-0.61929	-0.329725
YLR123C	0.14876	1.3397	0.68553	0.3428	0.37603	1.13076	0.02667	1.04564	0.520855	0.912245	0.19287	1.11715	-0.508905	0.425825	-0.156495	0.650055	0.3721	0.17779	0.49288	0.33792	0.74281	1.03632	1.01144	0.559775	0.55786	1.3249	1.58677	1.483	1.26662	0.833515	0.249035	1.43846	1.62606	0.93493	-0.09177	0.82501	1.33187	1.15247	0.4091	-0.084595	0.802535	1.40069	1.46481	1.10747	0.46292	0.445825	0.76014	1.61429	0.672885
YNL247W	-1.53289	-1.50738	-1.32813	-1.4371	-1.57667	-1.61624	-1.49639	-1.80258	-1.48401	-1.55482	-1.6432	-1.46847	-0.973635	-1.12396	-1.19525	-0.867935	-0.99535	-1.19207	-1.32979	-1.48623	-1.74031	-1.53737	-1.32119	-1.13284	-1.87221	-1.59197	-1.8887	-1.79705	-1.54821	-1.41734	-1.27367	-1.44067	-1.65119	-1.11944	-1.57118	-1.56473	-1.5319	-1.4569	-1.43978	-1.37054	-1.29459	-1.49646	-1.58745	-1.20161	-1.92944	-1.47111	-1.69129	-1.79764	-1.63478
YOR345C	1.07456	1.13974	1.0041	0.83821	0.57783	1.01322	2.44361	2.12274	2.379	2.55578	1.70128	3.18777	4.28962	4.2066	4.17159	5.02705	4.51696	4.56363	1.16142	1.05972	1.58402	0.947475	2.21973	1.2815	2.31505	2.07515	1.52084	1.56349	0.500915	0.572495	1.92674	2.55978	2.17369	1.73352	1.36104	1.40095	2.50247	2.38223	1.49212	0.388475	0.581555	0.77162	2.87716	2.27513	1.35155	0.451655	1.07933	0.43092	1.47287
YER014C-A	0.0738	0.23069	-0.47227	0.46195	0.3038	-0.20175	-0.27701	-0.126705	0.020555	-0.147315	-0.37505	0.299085	-0.175295	0.286395	-0.352415	0.652475	-0.25139	0.21804	0.21128	0.32622	-0.00753	0.903005	0.44026	0.717915	0.45521	0.702725	0.30583	1.25466	-0.009815	0.794865	0.133315	0.400585	-0.1268	0.65347	0.21041	0.66866	0.53876	0.329945	0.35552	0.216545	-0.278665	0.40519	-0.14812	0.90223	0.52357	0.028355	0.4813	0.67688	0.632485
YNR065C	0.15923	0.06125	0.37623	0.04025	0.14501	0.38472	0.04165	0.461505	-0.033815	0.180845	-0.18478	0.247235	0.227175	0.467055	0.527345	0.243385	0.54171	0.37917	0.10349	0.16478	-0.01112	0.210245	-0.1996	0.006575	0.05168	-0.039435	-0.08739	-0.192285	0.082355	-0.283545	-0.294125	0.454955	0.08861	0.67422	0.07998	0.12714	0.10778	0.274505	0.27167	-0.223305	0.178235	0.35473	-0.21514	0.25821	-0.1087	0.005535	-0.11152	0.19091	0.077735
YKL132C	0.6968	0.44418	0.49499	0.53129	0.61933	0.33282	-0.39845	0.167425	-0.160855	0.084385	-0.66594	-0.291605	-0.369455	0.114825	-0.433895	0.274375	-0.29462	-0.04991	0.77493	0.84382	0.19472	0.552115	0.13607	0.407895	0.12425	0.456055	0.04973	-0.224845	1.15248	-0.242775	0.044285	0.646975	0.50547	0.88592	0.68543	0.82677	0.82073	0.776205	0.10235	-0.138985	0.036495	0.2272	0.71597	0.52498	0.15395	-0.144645	-0.46676	-0.46906	0.148705
YKL012W	-0.24318	-0.3043	-0.19677	-0.31515	-0.47091	-0.15562	-0.38326	-0.175335	0.008775	0.141975	0.01375	-0.200575	-0.250865	-0.372755	-0.308845	-0.359685	-0.38632	-0.44984	-0.62903	-0.23062	0.20422	-0.299325	-0.43936	-0.357675	-0.16578	-0.180515	-0.43873	-0.574575	-0.386555	-0.300415	0.608495	-0.099525	-0.15114	-0.39188	-0.44163	-0.48106	-0.80744	-0.306825	-0.77122	-0.075105	-0.195345	-0.87725	-0.16673	-0.35539	-0.37882	-0.208545	-0.59322	-0.92387	-0.449255
YPL222W	2.54158	2.14897	2.50844	2.48933	2.52467	2.63887	3.07189	3.12348	3.07885	3.1231	3.08877	3.02191	2.21678	2.73706	2.54067	2.15644	2.61147	2.49591	2.58712	2.6332	2.50855	2.76869	2.74934	2.17368	2.25791	2.26073	2.21353	2.46188	2.21864	2.72174	2.01301	2.25411	2.60257	3.096	2.72783	2.73538	2.22721	2.44225	2.69563	2.2656	2.05869	2.49197	2.28041	2.16223	2.48444	2.76627	2.7906	2.21008	2.4346
YLR395C	0.34861	0.26612	0.24255	0.43427	0.0025	0.16254	0.29069	-0.182265	0.108515	-0.102575	0.06293	0.142795	-0.370395	-0.446635	-0.482795	-0.210185	-0.42149	-0.54631	-0.10755	-0.0754	-0.24238	-0.201305	-0.42924	-0.145135	0.60252	0.405755	0.04384	-0.055765	0.460735	0.267455	-0.209195	-0.416095	0.38761	0.17524	0.34009	-0.05026	0.09494	0.096995	0.14572	0.247365	-0.118655	0.27963	0.56257	-0.11805	0.21507	0.114615	-0.02205	-0.3033	-0.240755
YHR141C	-2.38225	-2.10613	-2.48962	-2.12025	-2.24212	-2.30613	-1.1319	-1.82908	-1.23494	-1.28374	-1.25563	-1.18788	-1.15558	-1.1275	-1.16441	-0.813285	-1.30146	-1.03639	-1.81013	-2.31648	-2.21962	-1.70616	-1.69959	-1.19264	-0.9122	-1.61502	-1.9882	-2.25121	-2.53948	-1.77117	-0.945295	-1.47544	-1.38712	-1.51487	-1.96034	-1.96341	-1.29899	-1.75466	-1.92181	-1.1199	-1.50798	-1.52861	-1.42952	-1.85265	-1.96972	-2.08906	-1.68577	-2.07652	-1.95878
YAL041W	0.24029	0.03387	0.2793	-0.02846	0.20759	0.16268	0.09863	-0.353545	-0.257065	-0.127835	-0.04278	-0.040105	-0.059325	-0.138875	-0.197635	-0.044325	-0.01368	-0.24136	0.18321	-0.15693	-0.39194	-0.168905	-0.23551	-0.045225	-0.09822	-0.292855	-0.35902	-0.231675	-0.034345	-0.046255	-0.421905	-0.296325	-0.16342	0.31153	-0.23956	0.12823	0.04464	-0.206545	0.05846	-0.285505	-0.122705	-0.11549	-0.17739	-0.19018	-0.00761	0.039195	-0.0813	-0.16906	-0.187495
YBL052C	-1.25366	-0.8502	-1.21942	-1.15727	-1.22284	-1.00518	-1.47894	-1.30934	-0.793935	-0.987705	-0.99412	-0.910695	-0.857635	-0.855195	-0.956215	-0.794565	-1.06619	-1.25097	-1.34276	-1.04205	-0.97472	-0.995075	-1.15348	-0.686825	-1.5106	-1.142	-1.29613	-1.1202	-1.55473	-1.04436	-0.546005	-1.04983	-1.04362	-0.70371	-1.09697	-0.86228	-1.3804	-1.03631	-1.05247	-0.948615	-1.19301	-1.28047	-1.38718	-0.43531	-1.54655	-1.01795	-1.77622	-1.56318	-1.1057
YCL045C	-0.50516	-0.28083	-0.33108	-0.29211	-0.31639	-0.19047	0.12191	0.096675	-0.022905	-0.004225	0.06197	0.153915	0.070475	-0.042325	0.176845	0.176255	0.01885	0.06223	-0.42348	-0.64568	-0.2538	0.068635	-0.04661	-0.223975	0.02258	-0.311875	0.04542	-0.521785	-0.628515	-0.354215	-0.648505	-0.370375	-0.36907	-0.53399	-0.70689	-0.52172	0.05516	-0.277895	-0.01193	-0.114865	0.110525	-0.05089	-0.34439	-0.17779	-0.31092	-0.372415	-0.2697	-0.49127	-0.345415
YDL135C	-0.19966	-0.37688	-0.01763	-0.1268	-0.35312	-0.10328	-0.33818	-0.426605	-0.323955	-0.429845	0.13761	-0.337875	-0.353815	-0.393955	-0.187395	-0.382945	-0.21072	-0.98962	-0.26927	-0.26987	0.06664	-0.672955	-0.35783	-0.279305	-0.7197	-0.562895	-0.45211	-0.338305	-0.194245	-0.212795	0.620785	-0.300765	-0.63097	-1.17324	-0.35229	-0.44248	-0.73446	-0.429005	-0.65976	-0.288925	-0.009935	-0.96414	-0.33549	-0.33685	-0.10007	-0.570115	-0.5149	-0.74763	-0.249475
YNL011C	1.50371	1.63497	1.60512	1.85183	1.70577	1.88968	2.18996	2.12532	1.70415	2.17069	1.91076	2.18213	1.62302	1.96494	1.72358	1.78686	2.04971	2.14894	1.53649	1.62112	1.22179	1.46158	1.5181	1.2205	1.52236	1.61045	1.47959	1.80211	1.49537	1.36729	1.46571	1.82407	1.56351	1.90199	1.73978	1.86214	1.42305	1.37877	1.44518	1.26212	1.73727	1.64065	1.30486	1.33854	1.83066	1.51321	1.75296	2.06667	1.64624
YMR237W	0.25136	0.03799	0.19909	0.08555	0.26502	0.29282	0.57929	0.770635	0.174995	0.397085	0.17385	0.505995	0.368025	0.563885	0.661725	0.396515	0.74447	0.53666	0.41691	0.65419	-0.02025	0.266175	0.00496	0.325105	-0.10115	0.142765	-0.04785	-0.304525	-0.062685	0.013235	-0.159745	0.311985	0.24561	0.36173	0.20736	0.37161	0.3665	0.503055	0.22767	0.340545	0.233215	-0.16376	-0.16501	-0.00667	0.00176	0.028325	0.08646	0.08464	-0.044685
Q0032	-0.20605	0.10713	-0.47834	-0.14245	-1.31335	-0.21006	-0.04144	-0.144275	0.291855	-0.281745	0.08	-0.222195	0.388805	0.101285	0.520325	-0.211835	-0.0125	0.04656	0.39772	0.33447	0.81405	0.759405	0.13059	-0.111115	1.09304	0.429215	0.52393	-0.169155	0.722705	0.530405	-0.086665	-0.055375	0.0127	0.62707	0.67399	0.07807	0.51087	-0.096435	-0.38601	0.347285	0.452285	-0.48358	0.14344	0.9064	0.68095	0.281925	0.75384	0.16325	0.738375
YOR020W-A	1.32389	0.83418	1.20187	0.96326	1.24409	1.05362	1.74412	1.67439	1.78099	2.02427	2.01707	1.8175	1.92782	1.70958	1.75713	1.3114	1.58978	2.02504	1.34186	1.18817	0.98145	0.508575	1.21414	1.44226	0.6578	0.899895	1.17879	1.1784	1.17796	0.905275	1.89316	1.48422	0.90934	0.47238	1.58622	1.43684	0.73265	0.621825	0.851	1.60669	0.933095	0.19681	0.92608	0.49232	1.73595	1.03758	0.87626	0.91979	1.05764
YOR054C	2.52102	2.44648	2.68766	2.35563	2.47592	2.65328	1.72022	1.6843	2.00502	2.07362	1.69419	1.92939	1.74141	1.82421	1.85401	1.20914	1.69371	1.75548	1.59527	1.96748	1.93743	1.64139	1.6542	1.45826	1.55315	1.81035	2.05211	1.75164	2.14676	1.95138	1.70273	1.28777	1.82304	1.70816	2.13697	2.13771	1.35786	1.7753	1.75275	1.86732	1.53533	1.56758	2.08298	1.93484	2.01297	2.20031	1.99868	1.43237	2.20917
Q0070	-0.47462	-0.13066	-0.56953	0.24607	-0.9143	-0.0273	0.16904	1.20874	-0.627615	0.720445	-1.31777	1.38332	-0.421725	-1.07042	-0.249665	-0.577155	-0.85443	-0.94117	-0.54403	-0.54122	-0.42155	0.072685	-0.77567	-0.288745	-0.4959	0.650195	-0.73373	-0.635505	-0.513215	-0.918045	-0.688745	-0.469445	0.01918	0.38845	-0.94015	-0.46817	-0.64318	0.390335	-0.4273	-0.194895	-0.075825	-0.96957	-0.43487	0.77218	-0.88844	0.300445	-1.15472	-0.54129	-0.139675
YGR214W	-3.10875	-2.6677	-2.84554	-2.08291	-2.90984	-2.6386	-1.14037	-2.11902	-1.60099	-1.45188	-1.38129	-1.32095	-1.10777	-1.1428	-1.09672	-0.832005	-1.01928	-1.08686	-2.2456	-2.62139	-2.87142	-1.9768	-1.68667	-1.43012	-1.59044	-1.97046	-2.44135	-2.74367	-2.28701	-1.91023	-1.87647	-2.23488	-2.25051	-2.2425	-2.42796	-2.25742	-1.63922	-2.29394	-1.45421	-1.35072	-2.22083	-1.92206	-1.94212	-2.04026	-2.85676	-2.46535	-2.03905	-2.47507	-2.60896
[truncated: 5,625 more rows]
[truncated: 147 more columns]
