# Supplementary material for: Genetic Architecture of Ethanol-Responsive Transcriptome Variation in Saccharomyces cerevisiae Strains
Source: Oxford University Press journal article supplement (doi:10.1534/genetics.114.167429), 2014-06-26
Supplement: genetics.114.167429-9.xls [file genetics.114.167429-9.xls]

## Sheet: limma header descriptions
Header description for limma output
Coef.	Average expression for denoted strain
t.	T value from T test
p.value.	p value calculated from T test
q.value	q value FDR
F.	F value from ANOVA
F.p.value.	p value calculated from ANOVA
ID	gene identifier

## Sheet: EtOH response mean centered
Coef.DBY	Coef.M22	Coef.YPS	t.DBY	t.M22	t.YPS	p.value.DBY	q.value.DBY	p.value.M22	q.value.M22	p.value.YPS	q.value.YPS	F	F.p.value	q.value	ID
3.14949	-1.0556	-2.0939	32.8129	-10.9977	-21.8152	2.81872e-18	7.89245e-15	1.03785e-09	5.04993e-08	5.67009e-15	4.89348e-12	576.865	6.38472e-19	1.58945e-15	YOR273C
-0.925838	1.99137	-1.06553	-13.0198	28.0041	-14.9843	5.92203e-11	3.45178e-09	5.49932e-17	1.65579e-13	5.07026e-12	4.62279e-10	406.148	1.74612e-17	2.17989e-14	YLR300W
-0.76137	1.82645	-1.06508	-10.5227	25.2428	-14.7201	2.15382e-09	5.01441e-08	3.80754e-16	5.73507e-13	6.9423e-12	5.57648e-10	332.498	1.14271e-16	6.62686e-14	YDL168W
-2.6545	0.0428957	2.61161	-21.9618	0.354894	21.6069	5.01184e-15	2.97786e-12	0.726554	0.38482	6.76535e-15	4.89348e-12	327.224	1.32743e-16	6.62686e-14	YHR136C
-1.57353	0.460299	1.11324	-24.6072	7.19824	17.409	6.11474e-16	8.55015e-13	7.46807e-07	1.07601e-05	3.4745e-13	6.50589e-11	331.049	1.19047e-16	6.62686e-14	YPL019C
1.93986	-0.307323	-1.63254	22.9455	-3.63514	-19.3103	2.23279e-15	2.0804e-12	0.00174722	0.00436158	5.30138e-14	1.86318e-11	314.57	1.9205e-16	7.97216e-14	YER188W
-1.46751	-0.851769	2.31928	-15.0083	-8.71107	23.7194	4.92882e-12	5.11029e-10	4.39651e-08	1.11314e-06	1.20867e-15	3.40294e-12	297.729	3.21352e-16	1.14244e-13	YGL009C
0.235076	1.24504	-1.48011	3.37337	17.8664	-21.2398	0.00316934	0.00547202	2.17476e-13	1.10888e-10	9.27201e-15	5.21409e-12	269.456	8.16017e-16	2.54113e-13	YOR192C-B
-1.23835	0.407656	0.830696	-21.8912	7.20642	14.6848	5.31825e-15	2.97786e-12	7.34859e-07	1.06671e-05	7.24298e-12	5.65594e-10	257.42	1.24947e-15	3.11412e-13	YAL003W
-0.834546	-0.309978	1.14452	-15.7304	-5.84279	21.5732	2.13987e-12	2.972e-10	1.22448e-05	9.22827e-05	6.96264e-15	4.89348e-12	257.484	1.24656e-15	3.11412e-13	YGR233C
0.275606	1.17193	-1.44754	3.90979	16.6252	-20.535	0.000932158	0.00201651	7.95849e-13	1.84337e-10	1.72254e-14	8.06206e-12	245.897	1.91403e-15	4.3258e-13	YFL002W-A
-0.676254	2.04236	-1.3661	-6.89354	20.8192	-13.9257	1.37103e-06	9.44403e-06	1.33873e-14	1.34471e-11	1.8397e-11	1.23208e-09	232.631	3.20591e-15	6.66423e-13	YOR049C
-2.00684	0.616295	1.39055	-20.3375	6.24557	14.0919	2.05628e-14	9.60901e-12	5.20095e-06	4.65916e-05	1.49464e-11	1.07446e-09	224.468	4.4673e-15	8.56624e-13	YAR071W
0.151689	1.16343	-1.31512	2.17528	16.684	-18.8593	0.0423567	0.0439872	7.46963e-13	1.84337e-10	8.1526e-14	2.29206e-11	220.18	5.343e-15	9.50253e-13	YDR210W-B
0.155983	1.25698	-1.41296	2.06471	16.6384	-18.7031	0.0527822	0.0519605	7.84622e-13	1.84337e-10	9.48414e-14	2.42373e-11	217.471	5.99331e-15	9.94859e-13	YDR261W-B
-0.594899	-1.00488	1.59978	-7.46645	-12.612	20.0785	4.4206e-07	3.77147e-06	1.0243e-10	8.52985e-09	2.59999e-14	1.04459e-11	213.008	7.2637e-15	1.13043e-12	YHR208W
1.33374	-0.454381	-0.879356	19.2903	-6.57189	-12.7185	5.40233e-14	1.88915e-11	2.63908e-06	2.81837e-05	8.86582e-11	4.45455e-09	198.913	1.36917e-14	1.93768e-12	YGR238C
-1.07818	0.405428	0.67275	-19.3901	7.29128	12.0988	4.91734e-14	1.88915e-11	6.21917e-07	9.36276e-06	2.08332e-10	9.37448e-09	198.381	1.40355e-14	1.93768e-12	YPL131W
-0.966329	0.119544	0.846786	-17.7617	2.19729	15.5644	2.41864e-13	4.83782e-11	0.0405199	0.0491683	2.58456e-12	2.59138e-10	193.913	1.73258e-14	2.26839e-12	YJL012C
-1.00403	0.26571	0.73832	-18.632	4.93083	13.7012	1.01638e-13	2.90051e-11	9.11944e-05	0.000443555	2.44338e-11	1.49177e-09	192.75	1.83161e-14	2.27954e-12	YJR123W
-1.33314	-1.06714	2.40029	-10.6248	-8.50482	19.1296	1.83741e-09	4.47799e-08	6.35561e-08	1.50764e-06	6.29239e-14	1.96552e-11	189.983	2.09333e-14	2.45733e-12	YKL120W
-0.276546	1.66978	-1.39323	-2.95604	17.8486	-14.8925	0.00807468	0.0117642	2.21443e-13	1.10888e-10	5.65216e-12	4.81508e-10	189.272	2.16703e-14	2.45733e-12	YOR391C
0.357171	0.960256	-1.31743	4.9895	13.4143	-18.4038	7.99422e-05	0.000267808	3.53108e-11	3.936e-09	1.2712e-13	2.9764e-11	187.357	2.38042e-14	2.57795e-12	YGR243W
-0.846367	-0.227862	1.07423	-14.1779	-3.81702	17.9949	1.34346e-11	1.13646e-09	0.00115279	0.00318982	1.91022e-13	4.13198e-11	185.93	2.55445e-14	2.64701e-12	YFL021W
-0.362968	1.41699	-1.05402	-4.63652	18.1005	-13.464	0.000177262	0.000513041	1.71819e-13	1.10888e-10	3.31138e-11	1.98061e-09	182.829	2.98315e-14	2.96963e-12	YCR020C
-1.38998	0.856908	0.533075	-18.5455	11.4331	7.11241	1.10599e-13	2.90051e-11	5.42402e-10	3.1355e-08	8.85072e-07	7.56512e-06	181.048	3.26499e-14	3.12371e-12	YER062C
-1.16131	0.479354	0.681956	-18.5168	7.6432	10.8736	1.13749e-13	2.90051e-11	3.14566e-07	5.21054e-06	1.25304e-09	4.18504e-08	179.08	3.61106e-14	3.14419e-12	YLR048W
-1.5687	1.74445	-0.17575	-15.1878	16.8894	-1.70157	3.99296e-12	4.29499e-10	5.99627e-13	1.84337e-10	0.105041	0.0881067	178.834	3.65707e-14	3.14419e-12	YOL126C
-0.362685	1.67996	-1.31728	-3.81997	17.6941	-13.8742	0.00114503	0.0023969	2.59119e-13	1.1139e-10	1.96273e-11	1.23743e-09	179.3	3.57035e-14	3.14419e-12	YOR343W-B
0.35155	0.930187	-1.28174	4.82931	12.7781	-17.6074	0.000114609	0.000357992	8.18004e-11	7.69568e-09	2.83161e-13	5.68496e-11	171.186	5.46936e-14	4.54247e-12	YDL024C
-1.82365	0.585231	1.23842	-17.773	5.70354	12.0694	2.39115e-13	4.83782e-11	1.65398e-05	0.000116332	2.17142e-10	9.53561e-09	170.308	5.73419e-14	4.60489e-12	YHR033W
-1.15533	0.493954	0.66138	-17.9361	7.66843	10.2677	2.02689e-13	4.73454e-11	2.99752e-07	4.98984e-06	3.21903e-09	8.87819e-08	167.5	6.68143e-14	5.20059e-12	YDR385W
0.375135	1.22264	-1.59778	3.99437	13.0185	-17.0129	0.000767972	0.00172778	5.93225e-11	6.15602e-09	5.25991e-13	8.43704e-11	163.688	8.25557e-14	6.2358e-12	YGR161W-B
0.230594	0.674799	-0.905391	4.32665	12.6613	-16.9879	0.000358984	0.000920901	9.57944e-11	8.48262e-09	5.40045e-13	8.43704e-11	161.187	9.50905e-14	6.96831e-12	YHR001W-A
-1.47386	0.100864	1.373	-15.6935	1.07399	14.6195	2.23132e-12	2.972e-10	0.296195	0.213909	7.83489e-12	5.95153e-10	158.964	1.08016e-13	7.68744e-12	YGR234W
0.198262	1.0905	-1.28876	2.47877	13.634	-16.1127	0.0226689	0.0268263	2.66196e-11	3.33668e-09	1.39418e-12	1.77689e-10	155.682	1.30787e-13	9.06556e-12	YPR194C
0.932705	0.00892	-0.941625	14.8123	0.141659	-14.954	6.21787e-12	6.07037e-10	0.888831	0.432078	5.25521e-12	4.62279e-10	152.717	1.55987e-13	1.05039e-11	YML091C
0.405094	0.956593	-1.36169	4.96994	11.7361	-16.706	8.35274e-05	0.00027689	3.49102e-10	2.28408e-08	7.29536e-13	1.08053e-10	152.193	1.60978e-13	1.05552e-11	YCL019W
-2.0839	0.686964	1.39694	-16.7799	5.53154	11.2484	6.73949e-13	1.25757e-10	2.40544e-05	0.000157695	7.12673e-10	2.63842e-08	151.215	1.70768e-13	1.06503e-11	YHR215W
-0.661323	-0.590553	1.25188	-9.03731	-8.0702	17.1075	2.48142e-08	3.65309e-07	1.4067e-07	2.70373e-06	4.76004e-13	8.36673e-11	151.484	1.68011e-13	1.06503e-11	YOL007C
1.13149	0.160562	-1.29205	13.6511	1.93714	-15.5883	2.60429e-11	1.90889e-09	0.0676457	0.0722964	2.5152e-12	2.59138e-10	149.288	1.92031e-13	1.16666e-11	YGR121C
-1.63574	2.65344	-1.0177	-10.3001	16.7084	-6.40832	3.05759e-09	6.85132e-08	7.27654e-13	1.84337e-10	3.70156e-06	2.35956e-05	146.954	2.21802e-13	1.28621e-11	YDL223C
-1.08024	1.68301	-0.602766	-10.6925	16.6589	-5.96635	1.65445e-09	4.19811e-08	7.67446e-13	1.84337e-10	9.39583e-06	4.98793e-05	147.34	2.16551e-13	1.28621e-11	YLR053C
-0.911345	0.324677	0.586667	-16.5909	5.91068	10.6802	8.2592e-13	1.44485e-10	1.05841e-05	8.26727e-05	1.68637e-09	5.3403e-08	146.241	2.31893e-13	1.31359e-11	YDR481C
-0.852875	-0.344674	1.19755	-11.5828	-4.68095	16.2637	4.35817e-10	1.62032e-08	0.000160274	0.000684412	1.18003e-12	1.58027e-10	144.973	2.51111e-13	1.38959e-11	YLR303W
-0.971618	0.327139	0.644479	-16.2894	5.48455	10.8048	1.1472e-12	1.78808e-10	2.66615e-05	0.000169224	1.39205e-09	4.59901e-08	142.073	3.02002e-13	1.6326e-11	YBL092W
-1.11582	0.484588	0.631228	-16.5117	7.17086	9.34082	8.99898e-13	1.48169e-10	7.88307e-07	1.11376e-05	1.47473e-08	2.89101e-07	141.777	3.07816e-13	1.6326e-11	YOR133W
-0.324936	1.5325	-1.20756	-3.32538	15.6835	-12.3581	0.00353286	0.00599424	2.25683e-12	4.53587e-10	1.4512e-10	7.12784e-09	141.241	3.1865e-13	1.65568e-11	YDR034C-D
-0.710489	-0.686489	1.39698	-8.3824	-8.09924	16.4816	7.92998e-08	9.40425e-07	1.33295e-07	2.617e-06	9.29771e-13	1.30774e-10	140.466	3.35042e-13	1.67415e-11	YER001W
0.408585	1.11706	-1.52565	4.26292	11.6547	-15.9177	0.000415268	0.00103419	3.926e-10	2.46488e-08	1.73288e-12	1.99114e-10	140.422	3.36012e-13	1.67415e-11	YLR410W-B
1.0076	-0.0801927	-0.927409	14.561	-1.15888	-13.4022	8.40827e-12	7.35544e-10	0.260775	0.194993	3.58709e-11	2.08917e-09	135.461	4.66438e-13	2.27636e-11	YPR013C
-1.08235	-0.199002	1.28136	-12.6379	-2.3236	14.9615	9.88907e-11	4.87367e-09	0.0313194	0.0405302	5.20881e-12	4.62279e-10	134.074	5.12263e-13	2.45297e-11	YER091C
-0.67108	-0.545422	1.2165	-8.82469	-7.17229	15.997	3.59698e-08	4.891e-07	7.86087e-07	1.11376e-05	1.58579e-12	1.94419e-10	132.784	5.59377e-13	2.57896e-11	YNL277W
-1.0134	0.407711	0.605689	-15.9277	6.40802	9.51966	1.7135e-12	2.51887e-10	3.70385e-06	3.58167e-05	1.09095e-08	2.34004e-07	132.839	5.5729e-13	2.57896e-11	YNR044W
-0.706465	2.00865	-1.30218	-5.5392	15.7493	-10.2101	2.36546e-05	9.68324e-05	2.09464e-12	4.4943e-10	3.52824e-09	9.45484e-08	132.008	5.90024e-13	2.67249e-11	YOL084W
1.26412	1.12566	-2.38978	8.40967	7.48859	-15.8983	7.54714e-08	9.03013e-07	4.23519e-07	6.75379e-06	1.77097e-12	1.99114e-10	130.832	6.40067e-13	2.8472e-11	YLL053C
-1.03801	0.34399	0.694017	-15.5727	5.16072	10.412	2.56028e-12	3.24897e-10	5.45322e-05	0.000302162	2.562e-09	7.49959e-08	130.141	6.71653e-13	2.93711e-11	YER102W
-0.590887	2.13533	-1.54445	-4.2414	15.3275	-11.0861	0.000436218	0.00107712	3.39451e-12	6.00336e-10	9.08392e-10	3.11416e-08	129.545	7.00292e-13	3.00674e-11	YAL054C
-1.02006	0.305743	0.71432	-15.383	4.61075	10.7723	3.18327e-12	3.56e-10	0.000187937	0.000773996	1.46328e-09	4.71957e-08	128.896	7.33e-13	3.04354e-11	YJR145C
-0.327152	1.0548	-0.727649	-4.78657	15.4328	-10.6463	0.000126212	0.000386049	3.00566e-12	5.66357e-10	1.7772e-09	5.56219e-08	129.064	7.24368e-13	3.04354e-11	YKL051W
-1.17378	0.424893	0.74889	-15.5363	5.62391	9.91235	2.66923e-12	3.24897e-10	1.96633e-05	0.00013418	5.70258e-09	1.43128e-07	127.972	7.82522e-13	3.19785e-11	YNL209W
-1.22184	0.43427	0.787572	-15.4874	5.50458	9.98285	2.82282e-12	3.28852e-10	2.55163e-05	0.000162991	5.08519e-09	1.31329e-07	127.476	8.10635e-13	3.22287e-11	YDL229W
0.585378	1.6145	-2.19988	4.03254	11.1219	-15.1545	0.000703672	0.00161957	8.60794e-10	4.32012e-08	4.15152e-12	4.02456e-10	127.406	8.14682e-13	3.22287e-11	YHR139C
1.11917	1.13225	-2.25142	7.7463	7.83684	-15.5831	2.58438e-07	2.47286e-06	2.17723e-07	3.78467e-06	2.52991e-12	2.59138e-10	125.558	9.30233e-13	3.62017e-11	YLL052C
-0.897185	1.27495	-0.377768	-10.6621	15.1515	-4.48938	1.73413e-09	4.362e-08	4.16603e-12	6.97441e-10	0.00024767	0.000688274	125.264	9.50254e-13	3.64113e-11	YJL108C
-0.0274837	1.12845	-1.10097	-0.328303	13.4798	-13.1515	0.746251	0.360283	3.24451e-11	3.75159e-09	4.97607e-11	2.69336e-09	122.29	1.18163e-12	4.45414e-11	YFL002W-B
-1.15208	1.45074	-0.298655	-11.5281	14.5165	-2.98844	4.71942e-10	1.6936e-08	8.87371e-12	1.33517e-09	0.00751582	0.0106915	121.526	1.25071e-12	4.64795e-11	YHL024W
-1.65946	-0.202375	1.86184	-12.3584	-1.50713	13.8655	1.45064e-10	6.44155e-09	0.148121	0.129846	1.98427e-11	1.23743e-09	119.697	1.43479e-12	5.23906e-11	YOR345C
-0.392993	1.34862	-0.955631	-4.28745	14.7131	-10.4257	0.000392625	0.000992643	7.00079e-12	1.10914e-09	2.50742e-09	7.49959e-08	118.422	1.58088e-12	5.70472e-11	YJL163C
-0.863231	1.1625	-0.299264	-10.6969	14.4054	-3.70841	1.64324e-09	4.19811e-08	1.01588e-11	1.39579e-09	0.00147796	0.00288047	115.712	1.94902e-12	6.94005e-11	YJL107C
-0.986109	-0.649364	1.63547	-8.92116	-5.87468	14.7958	3.03727e-08	4.28207e-07	1.14338e-05	8.75513e-05	6.34128e-12	5.2442e-10	114.79	2.09516e-12	7.36863e-11	YLR355C
-1.88488	1.11446	0.770424	-14.8024	8.75206	6.05029	6.29217e-12	6.07037e-10	4.08866e-08	1.0524e-06	7.85719e-06	4.27564e-05	114.548	2.13545e-12	7.4047e-11	YDL124W
-1.27063	0.687011	0.583617	-14.7706	7.98624	6.78433	6.5356e-12	6.10126e-10	1.64473e-07	3.02889e-06	1.70976e-06	1.29277e-05	113.053	2.40441e-12	8.19057e-11	YCL064C
-1.02111	0.371099	0.650014	-14.5679	5.29436	9.27356	8.33827e-12	7.35544e-10	4.05353e-05	0.000236292	1.65339e-08	3.22248e-07	112.459	2.52149e-12	8.47042e-11	YBL072C
-0.643497	0.663826	-0.020329	-12.5615	12.9583	-0.396835	1.09734e-10	4.96551e-09	6.42621e-11	6.45258e-09	0.695883	0.344949	112.325	2.54864e-12	8.47042e-11	YDR513W
-1.88927	1.89177	-0.002501	-12.669	12.6858	-0.0167712	9.47949e-11	4.82401e-09	9.26641e-11	8.45687e-09	0.986793	0.427417	110.798	2.88366e-12	9.44072e-11	YPR151C
-1.41139	-0.387616	1.79901	-10.8935	-2.99173	13.8852	1.21565e-09	3.34751e-08	0.00746118	0.013307	1.93559e-11	1.23743e-09	110.448	2.96713e-12	9.6093e-11	YML123C
-0.645885	-0.698445	1.34433	-6.99996	-7.56959	14.5696	1.10734e-06	7.96565e-06	3.62266e-07	5.89088e-06	8.32187e-12	6.15756e-10	109.81	3.12598e-12	9.93366e-11	YJR109C
-0.966719	0.168573	0.798146	-13.6343	2.37751	11.2568	2.66071e-11	1.90889e-09	0.0280154	0.0373192	7.03748e-10	2.63842e-08	109.705	3.15321e-12	9.93366e-11	YLL045C
-0.198897	1.06215	-0.863252	-2.54576	13.5948	-11.0491	0.0196748	0.0240562	2.79856e-11	3.3718e-09	9.60419e-10	3.25283e-08	108.022	3.62416e-12	1.12731e-10	YHR140W
-0.491709	0.928419	-0.436709	-7.63707	14.4199	-6.78283	3.18278e-07	2.93729e-06	9.98023e-12	1.39579e-09	1.71499e-06	1.29277e-05	107.637	3.74258e-12	1.13628e-10	YAL049C
-0.826196	0.213794	0.612401	-13.9087	3.59915	10.3096	1.87925e-11	1.46156e-09	0.00189676	0.00464203	3.01192e-09	8.57907e-08	107.785	3.69667e-12	1.13628e-10	YPR102C
-1.13361	-0.420406	1.55402	-10.1654	-3.76987	13.9352	3.78973e-09	8.15941e-08	0.00128415	0.00343638	1.81773e-11	1.23208e-09	107.455	3.80004e-12	1.1406e-10	YLR348C
-1.20612	0.209458	0.996665	-13.4754	2.34018	11.1353	3.26277e-11	2.22534e-09	0.0302667	0.0395299	8.4372e-10	2.96702e-08	107.221	3.87528e-12	1.15074e-10	YLR249W
-0.897834	0.273961	0.623874	-13.9872	4.26799	9.71923	1.70313e-11	1.35939e-09	0.000410485	0.00142355	7.82803e-09	1.80497e-07	106.277	4.19602e-12	1.231e-10	YLR075W
-0.168689	-0.802733	0.971421	-2.31326	-11.008	13.3212	0.0319932	0.0352939	1.02188e-09	5.03401e-08	3.98485e-11	2.23863e-09	104.781	4.76636e-12	1.3818e-10	YJR137C
0.0485393	-1.01937	0.970828	0.598611	-12.5713	11.9727	0.556458	0.297551	1.08268e-10	8.78751e-09	2.48939e-10	1.06102e-08	104.01	5.09347e-12	1.45755e-10	YBL029W
-0.157548	-0.868733	1.02628	-2.0195	-11.1357	13.1552	0.0576764	0.055605	8.43217e-10	4.32012e-08	4.95221e-11	2.69336e-09	103.802	5.18588e-12	1.4693e-10	YJR016C
-0.915291	0.206185	0.709105	-13.4395	3.02748	10.412	3.41779e-11	2.22598e-09	0.00689178	0.0125214	2.56194e-09	7.49959e-08	102.787	5.66407e-12	1.58435e-10	YGL123W
1.17083	-0.473993	-0.696834	14.0054	-5.6699	-8.33553	1.66477e-11	1.35939e-09	1.77922e-05	0.000123759	8.63546e-08	1.23234e-06	102.644	5.73533e-12	1.5889e-10	YGL053W
-0.782631	0.0565993	0.726033	-12.6229	0.912881	11.7101	1.00922e-10	4.87367e-09	0.372673	0.25061	3.6243e-10	1.41398e-08	102.478	5.81962e-12	1.59227e-10	YJL079C
0.668073	0.61409	-1.28216	7.32943	6.73718	-14.0666	5.77158e-07	4.70809e-06	1.8817e-06	2.20226e-05	1.54241e-11	1.08275e-09	102.368	5.87563e-12	1.59227e-10	YOR019W
-1.11363	0.393819	0.719809	-13.8047	4.88184	8.92286	2.14265e-11	1.61873e-09	0.000101816	0.000484126	3.02826e-08	5.2928e-07	101.348	6.42824e-12	1.72248e-10	YNL069C
-0.842758	0.237397	0.605362	-13.4569	3.79069	9.66627	3.34162e-11	2.22567e-09	0.00122439	0.00332695	8.545e-09	1.95264e-07	99.5815	7.52525e-12	1.99569e-10	YBL087C
-1.07304	0.0151293	1.05791	-12.0272	0.169579	11.8577	2.30461e-10	9.46633e-09	0.867123	0.425671	2.93234e-10	1.16059e-08	98.3377	8.42173e-12	2.20808e-10	YPL018W
-0.657184	1.61	-0.952815	-5.56955	13.6445	-8.07499	2.2137e-05	9.20419e-05	2.62623e-11	3.33668e-09	1.39424e-07	1.76088e-06	97.3422	9.22446e-12	2.39269e-10	YBL107W-A
0.609012	-0.695421	0.0864087	10.9913	-12.5508	1.55948	1.04801e-09	2.99865e-08	1.11354e-10	8.79393e-09	0.135282	0.106247	96.7778	9.71684e-12	2.49644e-10	YNL064C
-1.31606	0.934737	0.381326	-13.2021	9.37681	3.82527	4.65612e-11	2.83525e-09	1.3875e-08	4.22691e-07	0.00113124	0.00233929	95.4303	1.10141e-11	2.74043e-10	YBR126C
1.14351	-0.601852	-0.54166	13.5842	-7.14963	-6.43459	2.83692e-11	1.98711e-09	8.22128e-07	1.14568e-05	3.50496e-06	2.24731e-05	95.4991	1.09434e-11	2.74043e-10	YIL117C
-1.74194	0.348818	1.39312	-12.8451	2.5722	10.273	7.47552e-11	3.94992e-09	0.0185985	0.0268287	3.1921e-09	8.87819e-08	95.5321	1.09098e-11	2.74043e-10	YLR343W
-0.46494	1.22443	-0.759489	-5.07743	13.3715	-8.29407	6.56633e-05	0.00022534	3.73256e-11	4.01046e-09	9.31409e-08	1.29618e-06	94.2296	1.23326e-11	3.03396e-10	YPR001W
0.904464	-0.325248	-0.579218	13.3099	-4.78629	-8.52367	4.04377e-11	2.51265e-09	0.000126293	0.000570885	6.14375e-08	9.33395e-07	94.0045	1.25987e-11	3.07749e-10	YLR213C
-1.32405	0.529556	0.794496	-13.351	5.33974	8.01124	3.83341e-11	2.43618e-09	3.66661e-05	0.000216216	1.56976e-07	1.93657e-06	93.3929	1.33542e-11	3.20994e-10	YJR061W
0.26421	0.691984	-0.956193	3.59571	9.4174	-13.0131	0.00191172	0.0036451	1.29555e-08	4.11968e-07	5.97485e-11	3.06801e-09	93.3983	1.33474e-11	3.20994e-10	YLR312C
-1.56209	1.54978	0.0123103	-11.6565	11.5646	0.0918613	3.91594e-10	1.50289e-08	4.47465e-10	2.63865e-08	0.927764	0.412284	92.9384	1.39481e-11	3.2904e-10	YMR195W
0.0688223	-1.07923	1.0104	0.763328	-11.97	11.2067	0.454584	0.259964	2.49902e-10	1.75031e-08	7.58298e-10	2.76852e-08	92.88	1.40266e-11	3.2904e-10	YPL092W
-0.728847	-0.698947	1.42779	-6.83606	-6.55562	13.3917	1.53969e-06	1.03359e-05	2.72899e-06	2.86368e-05	3.63616e-11	2.08917e-09	92.739	1.42178e-11	3.30621e-10	YPL256C
1.49632	0.0434247	-1.53975	11.3241	0.328636	-11.6528	6.36905e-10	2.07302e-08	0.746003	0.391244	3.93711e-10	1.5179e-08	91.0453	1.67557e-11	3.87536e-10	YNR060W
-0.942934	0.337581	0.605354	-13.0014	4.65465	8.34678	6.06822e-11	3.46701e-09	0.000170119	0.000719311	8.46041e-08	1.22301e-06	89.7494	1.90362e-11	4.26439e-10	YHR203C
0.800095	0.171098	-0.971194	10.1719	2.17523	-12.3471	3.7504e-09	8.13588e-08	0.0423612	0.0508599	1.47342e-10	7.12784e-09	89.8453	1.8856e-11	4.26439e-10	YMR020W
-0.260885	1.5421	-1.28121	-2.08449	12.3215	-10.237	0.0507615	0.0504072	1.52661e-10	1.12344e-08	3.3799e-09	9.14012e-08	89.9528	1.86567e-11	4.26439e-10	YPL280W
-0.907359	0.324111	0.583248	-12.9827	4.63747	8.34527	6.22064e-11	3.46824e-09	0.00017688	0.000736519	8.48368e-08	1.22301e-06	89.5185	1.94775e-11	4.33753e-10	YMR242C
-1.29765	0.464277	0.833376	-12.9713	4.64091	8.33041	6.31594e-11	3.46824e-09	0.000175505	0.000736418	8.71643e-08	1.23234e-06	89.3418	1.98227e-11	4.36529e-10	YJL116C
-0.469301	-0.726574	1.19587	-5.11655	-7.92148	13.038	6.01715e-05	0.000209125	1.85669e-07	3.31337e-06	5.78051e-11	3.06705e-09	89.2488	2.00072e-11	4.3707e-10	YBR045C
-0.31852	1.54888	-1.23036	-2.55046	12.4022	-9.85178	0.019479	0.0238899	1.36537e-10	1.05755e-08	6.29535e-09	1.54068e-07	88.7176	2.10978e-11	4.57099e-10	YMR322C
-0.913985	0.340408	0.573578	-12.9528	4.82417	8.12859	6.47401e-11	3.48228e-09	0.000115944	0.000537075	1.26247e-07	1.63297e-06	88.6288	2.12864e-11	4.57454e-10	YBL106C
-1.12918	0.535544	0.593639	-13.0793	6.20319	6.8761	5.47338e-11	3.25726e-09	5.6858e-06	4.95085e-05	1.42007e-06	1.11551e-05	88.528	2.15029e-11	4.57803e-10	YLL039C
-0.889407	0.244137	0.64527	-12.6345	3.46809	9.1664	9.9348e-11	4.87367e-09	0.00255639	0.00579963	1.98605e-08	3.80719e-07	88.1325	2.23756e-11	4.71044e-10	YFR031C-A
-0.46919	-0.621338	1.09053	-5.5973	-7.41239	13.0097	2.08366e-05	8.78037e-05	4.90956e-07	7.5417e-06	6.00195e-11	3.06801e-09	88.0789	2.24968e-11	4.71044e-10	YGR109C
0.115367	0.475743	-0.59111	2.4007	9.89988	-12.3006	0.0266962	0.0306337	5.81971e-09	2.24632e-07	1.5716e-10	7.4837e-09	87.9237	2.28521e-11	4.75423e-10	YDL025C
0.655611	-0.475886	-0.179726	12.5928	-9.14068	-3.45212	1.0515e-10	4.8978e-09	2.07581e-08	6.07953e-07	0.00265082	0.0045962	87.5694	2.36865e-11	4.87965e-10	YCR037C
-0.908886	0.359322	0.549564	-12.822	5.06909	7.75289	7.71162e-11	3.99598e-09	6.6898e-05	0.00034725	2.55221e-07	2.82342e-06	86.2455	2.71162e-11	5.53395e-10	YMR116C
-0.237811	0.970787	-0.732975	-3.03218	12.3779	-9.34569	0.00682017	0.0101748	1.41205e-10	1.06121e-08	1.46259e-08	2.89101e-07	86.0875	2.75606e-11	5.59023e-10	YJL048C
-1.47476	2.4514	-0.976634	-7.7011	12.801	-5.09991	2.81643e-07	2.65739e-06	7.93207e-11	7.69568e-09	6.24476e-05	0.000228801	85.8924	2.8121e-11	5.64561e-10	YDL222C
0.005623	1.03733	-1.04295	0.0603093	11.1259	-11.1862	0.952535	0.416092	8.5572e-10	4.32012e-08	7.81888e-10	2.81956e-08	85.8015	2.83862e-11	5.66023e-10	YOR393W
-0.879564	0.19117	0.688393	-12.2165	2.65522	9.56132	1.76659e-10	7.62119e-09	0.0155703	0.0234492	1.01753e-08	2.20661e-07	85.3861	2.96344e-11	5.85258e-10	YML063W
-1.37743	1.65744	-0.280016	-9.90937	11.9238	-2.01446	5.73035e-09	1.15148e-07	2.6684e-10	1.82685e-08	0.0582454	0.0555652	84.2549	3.33516e-11	6.55192e-10	YML054C
-0.468007	1.22461	-0.756607	-4.83043	12.6396	-7.80915	0.000114318	0.000357482	9.86632e-11	8.48971e-09	2.29415e-07	2.59688e-06	84.132	3.37856e-11	6.57859e-10	YPL189C-A
-0.745714	0.281044	0.464671	-12.5696	4.73722	7.83239	1.08528e-10	4.96551e-09	0.000141105	0.000618343	2.1956e-07	2.52537e-06	83.3417	3.67293e-11	7.08765e-10	YHR037W
1.59953	-0.669447	-0.93008	12.6031	-5.27475	-7.32835	1.0368e-10	4.8978e-09	4.23334e-05	0.000244425	5.78376e-07	5.41845e-06	82.8536	3.86885e-11	7.41641e-10	YOR344C
-0.962846	0.204688	0.758158	-11.9805	2.54689	9.4336	2.46214e-10	9.83558e-09	0.0196276	0.0279383	1.26063e-08	2.54932e-07	82.3868	4.06709e-11	7.68151e-10	YEL054C
-1.27269	1.51251	-0.239819	-9.8807	11.7426	-1.86187	6.0047e-09	1.19045e-07	3.45844e-10	2.28408e-08	0.0780646	0.0695342	82.3768	4.07143e-11	7.68151e-10	YOR348C
-0.519174	-0.158059	0.677232	-9.23104	-2.81033	12.0414	1.77782e-08	2.78311e-07	0.0111235	0.01819	2.25908e-10	9.77831e-09	82.074	4.20616e-11	7.88599e-10	YEL032W
-0.715895	0.454307	0.261587	-12.3013	7.80643	4.49489	1.56994e-10	6.86566e-09	2.30599e-07	3.95133e-06	0.000244579	0.00068103	80.1309	5.19724e-11	9.66773e-10	YOL143C
-0.08124	0.6264	-0.54516	-1.48127	11.4213	-9.94004	0.154827	0.118491	5.51857e-10	3.1355e-08	5.45121e-09	1.39339e-07	79.7785	5.40328e-11	9.9652e-10	YOL122C
-0.708096	0.130136	0.577959	-11.6358	2.13847	9.49736	4.03491e-10	1.52418e-08	0.0455988	0.0535819	1.13249e-08	2.37487e-07	79.3375	5.67397e-11	1.03865e-09	YGR085C
-0.738503	0.104791	0.633711	-11.4369	1.62285	9.81404	5.39355e-10	1.81252e-08	0.120994	0.111496	6.69699e-09	1.6201e-07	79.1949	5.76466e-11	1.04744e-09	YML026C
-0.684063	0.444599	0.239462	-12.1716	7.91079	4.26077	1.88118e-10	7.97217e-09	1.89432e-07	3.34701e-06	0.000417316	0.00103313	78.8951	5.96058e-11	1.06821e-09	YGR244C
-0.595726	-0.37341	0.969135	-7.53069	-4.72034	12.251	3.90449e-07	3.46511e-06	0.000146598	0.000637772	1.6837e-10	7.74548e-09	78.9635	5.91529e-11	1.06821e-09	YOR306C
0.517429	0.375058	-0.892486	7.11829	5.15968	-12.2779	8.74808e-07	6.59058e-06	5.46585e-05	0.000302714	1.62178e-10	7.59333e-09	78.605	6.15728e-11	1.09617e-09	YER158C
0.812666	-0.144574	-0.668093	11.5051	-2.04677	-9.45835	4.88068e-10	1.70343e-08	0.0546775	0.0617239	1.20919e-08	2.4659e-07	77.9075	6.66001e-11	1.17674e-09	YKR052C
0.562884	-0.825651	0.262769	8.17752	-11.995	3.81748	1.15347e-07	1.25236e-06	2.41212e-10	1.72747e-08	0.00115159	0.00236571	77.6689	6.84231e-11	1.20003e-09	YDL170W
0.361346	0.810472	-1.17182	3.66145	8.21238	-11.8738	0.00164533	0.00323602	1.08181e-07	2.33912e-06	2.86534e-10	1.16059e-08	76.4669	7.84832e-11	1.3676e-09	YGR110W
0.738207	0.344882	-1.08309	8.10133	3.78485	-11.8862	1.3278e-07	1.41533e-06	0.00124088	0.0033655	2.81537e-10	1.16059e-08	76.2602	8.03731e-11	1.37704e-09	YDL214C
1.2566	-0.774666	-0.481931	12.0335	-7.41838	-4.61508	2.28436e-10	9.46633e-09	4.85274e-07	7.48774e-06	0.000186099	0.00054292	76.225	8.07e-11	1.37704e-09	YLR160C
0.857669	-0.175979	-0.681689	11.5018	-2.35997	-9.14179	4.90445e-10	1.70343e-08	0.029053	0.0382947	2.07183e-08	3.85533e-07	76.3273	7.97539e-11	1.37704e-09	YMR008C
0.899075	0.818583	-1.71766	6.33046	5.76371	-12.0942	4.35367e-06	2.40129e-05	1.45207e-05	0.000104683	2.09702e-10	9.37448e-09	75.6833	8.59182e-11	1.4558e-09	YDR261W-A
-0.87198	0.285572	0.586409	-11.8515	3.88135	7.97017	2.95822e-10	1.1668e-08	0.000994903	0.00283099	1.69486e-07	2.03986e-06	75.5049	8.7717e-11	1.47626e-09	YOL120C
0.957052	-0.75276	-0.204293	11.4306	-8.99061	-2.43998	5.44395e-10	1.81252e-08	2.69098e-08	7.2958e-07	0.024593	0.0281703	74.9519	9.35636e-11	1.565e-09	YBR085W
0.754329	-0.358066	-0.396261	11.9883	-5.69062	-6.29764	2.43516e-10	9.83558e-09	1.701e-05	0.000119299	4.66303e-06	2.87402e-05	74.3727	1.00154e-10	1.66087e-09	YPL088W
-0.924106	0.112773	0.811334	-10.955	1.33689	9.61812	1.10722e-09	3.1066e-08	0.19695	0.160393	9.2562e-09	2.06386e-07	73.8712	1.06274e-10	1.73735e-09	YKL081W
-0.598493	-0.933217	1.53171	-4.634	-7.22569	11.8597	0.000178279	0.00051483	7.0748e-07	1.0485e-05	2.92387e-10	1.16059e-08	73.8813	1.06147e-10	1.73735e-09	YML027W
2.06574	0.217876	-2.28362	9.75503	1.02887	-10.7839	7.37923e-09	1.39559e-07	0.31638	0.22408	1.43743e-09	4.70904e-08	73.2522	1.14406e-10	1.84421e-09	YER053C-A
0.583618	0.434838	-1.01845	6.79722	5.06442	-11.8616	1.66565e-06	1.09716e-05	6.7599e-05	0.000349077	2.91576e-10	1.16059e-08	73.2651	1.1423e-10	1.84421e-09	YIL029C
-0.979377	0.290833	0.688545	-11.5758	3.43752	8.13831	4.40234e-10	1.62032e-08	0.00274019	0.0061107	1.24001e-07	1.622e-06	73.0925	1.16613e-10	1.88053e-09	YIL018W
-1.44369	0.438296	1.00539	-11.5441	3.50473	8.03935	4.61065e-10	1.67561e-08	0.00235203	0.00545755	1.4897e-07	1.84599e-06	72.4486	1.26006e-10	2.0122e-09	YDR281C
-1.05017	0.291624	0.758551	-11.4453	3.17826	8.26704	5.32769e-10	1.81252e-08	0.00492101	0.00967084	9.78614e-08	1.32005e-06	72.1933	1.29958e-10	2.06286e-09	YJL190C
0.919455	-0.544041	-0.375413	11.7428	-6.94823	-4.79459	3.45712e-10	1.34495e-08	1.22826e-06	1.57573e-05	0.000123947	0.000391665	72.0971	1.31484e-10	2.06557e-09	YHR049W
-0.488896	1.48325	-0.994358	-3.81731	11.5813	-7.76396	0.00115204	0.00240599	4.36768e-10	2.63121e-08	2.49918e-07	2.779e-06	72.0337	1.32499e-10	2.06825e-09	YML089C
-0.895638	0.194948	0.70069	-11.1759	2.43259	8.74329	7.93987e-10	2.36404e-08	0.0249766	0.0341271	4.1526e-08	6.74638e-07	71.443	1.4239e-10	2.21103e-09	YBR181C
-0.625105	-0.38517	1.01028	-7.19765	-4.43496	11.6326	7.47687e-07	5.83136e-06	0.000280363	0.0010577	4.05375e-10	1.53919e-08	71.281	1.45243e-10	2.22987e-09	YCL018W
-0.873185	0.91353	-0.0403463	-9.93046	10.3893	-0.458846	5.53686e-09	1.13175e-07	2.65525e-09	1.19523e-07	0.651518	0.330858	71.2704	1.45431e-10	2.22987e-09	YKL035W
-1.00033	0.327547	0.67278	-11.4976	3.76477	7.73283	4.93455e-10	1.70343e-08	0.0012992	0.00345827	2.65137e-07	2.91122e-06	71.0645	1.49154e-10	2.27732e-09	YLR029C
-0.87935	0.211923	0.667428	-11.2205	2.70413	8.51635	7.42875e-10	2.23598e-08	0.0140118	0.0216767	6.2251e-08	9.41984e-07	70.9179	1.5187e-10	2.30901e-09	YBR084C-A
-0.544292	1.13649	-0.592201	-5.60217	11.6974	-6.09528	2.06166e-05	8.72225e-05	3.69088e-10	2.36359e-08	7.14178e-06	4.01363e-05	70.7895	1.54293e-10	2.32521e-09	YML042W
-1.11513	0.297204	0.817929	-11.281	3.0066	8.27439	6.78947e-10	2.08829e-08	0.00721905	0.0129983	9.65536e-08	1.31243e-06	70.5823	1.58293e-10	2.37124e-09	YKL096W
0.663893	0.0248897	-0.688782	9.90627	0.371391	-10.2776	5.75938e-09	1.15148e-07	0.71443	0.38108	3.16837e-09	8.87819e-08	70.2846	1.64243e-10	2.44655e-09	YGR203W
-0.740339	1.55084	-0.810498	-5.55536	11.6372	-6.08182	2.28337e-05	9.4256e-05	4.0271e-10	2.47601e-08	7.34852e-06	4.08513e-05	70.0682	1.68724e-10	2.4913e-09	YNR002C
0.045078	0.935518	-0.980595	0.473866	9.83429	-10.3081	0.640962	0.327535	6.47831e-09	2.4694e-07	3.0187e-09	8.57907e-08	70.041	1.69295e-10	2.4913e-09	YPL281C
0.916348	-0.972832	0.0564833	9.75056	-10.3516	0.601021	7.43367e-09	1.39561e-07	2.81811e-09	1.24849e-07	0.554885	0.295723	69.8323	1.7376e-10	2.54992e-09	YLL028W
-0.555439	0.815998	-0.26056	-7.71015	11.327	-3.61689	2.76832e-07	2.62797e-06	6.34187e-10	3.35912e-08	0.00182156	0.00340567	69.2255	1.875e-10	2.73897e-09	YBR230C
-0.880363	0.745566	0.134796	-10.7184	9.07728	1.64114	1.58965e-09	4.14628e-08	2.31558e-08	6.58909e-07	0.117115	0.0956356	68.931	1.94597e-10	2.82444e-09	YIL136W
-0.75673	0.284615	0.472115	-11.3738	4.27781	7.09597	5.91857e-10	1.94924e-08	0.000401369	0.00140014	9.1444e-07	7.74242e-06	68.2555	2.12023e-10	3.05292e-09	YIL050W
-0.855604	0.145704	0.709901	-10.72	1.82555	8.89447	1.5858e-09	4.14628e-08	0.0835795	0.0845494	3.18242e-08	5.48666e-07	68.0305	2.18206e-10	3.12128e-09	YPL090C
-0.750969	0.264756	0.486214	-11.2941	3.98176	7.31235	6.65877e-10	2.08829e-08	0.00079048	0.00237739	5.96768e-07	5.54116e-06	67.8646	2.22892e-10	3.17463e-09	YML126C
0.97685	-0.347085	-0.629764	11.2899	-4.01141	-7.27844	6.70067e-10	2.08829e-08	0.000738568	0.00225277	6.37779e-07	5.84455e-06	67.7428	2.26402e-10	3.19906e-09	YKR044W
-0.773934	-0.0671027	0.841037	-9.43849	-0.818348	10.2568	1.25029e-08	2.10749e-07	0.423241	0.273371	3.27492e-09	8.92851e-08	67.2014	2.42763e-10	3.42026e-09	YGL125W
1.32054	-0.819759	-0.500786	11.2806	-7.00271	-4.27792	6.79319e-10	2.08829e-08	1.10126e-06	1.45885e-05	0.000401276	0.00100224	67.075	2.46769e-10	3.45703e-09	YLR158C
-0.763052	1.40728	-0.644229	-6.15543	11.3523	-5.1969	6.28834e-06	3.24799e-05	6.10894e-10	3.35912e-08	5.03155e-05	0.000190648	66.7929	2.55974e-10	3.56298e-09	YKL217W
-0.915856	0.393582	0.522272	-11.2868	4.85044	6.43639	6.73071e-10	2.08829e-08	0.000109277	0.000513233	3.49185e-06	2.24731e-05	66.3015	2.7293e-10	3.70987e-09	YCR031C
-0.580657	0.237291	0.343368	-11.2623	4.60243	6.65986	6.9809e-10	2.12339e-08	0.000191523	0.000785397	2.20329e-06	1.56637e-05	66.3111	2.72588e-10	3.70987e-09	YDR135C
-0.85781	0.22226	0.635549	-10.9073	2.8261	8.08118	1.19043e-09	3.29753e-08	0.0107466	0.0177374	1.37834e-07	1.75613e-06	66.272	2.73988e-10	3.70987e-09	YKL006W
-0.42934	0.821215	-0.391874	-5.92101	11.3253	-5.40431	1.03526e-05	4.95015e-05	6.35775e-10	3.35912e-08	3.18011e-05	0.000133681	66.3639	2.70708e-10	3.70987e-09	YKL150W
-0.509863	0.984082	-0.474219	-5.86749	11.3248	-5.4573	1.16118e-05	5.4019e-05	6.36277e-10	3.35912e-08	2.83038e-05	0.000122445	66.3407	2.71533e-10	3.70987e-09	YPL014W
-0.154956	0.983757	-0.828803	-1.65754	10.5231	-8.86556	0.113728	0.0936713	2.15246e-09	9.95792e-08	3.34777e-08	5.70991e-07	66.2098	2.76227e-10	3.71675e-09	YNL093W
-0.963562	0.123571	0.839991	-10.3202	1.3235	8.99669	2.96159e-09	6.68087e-08	0.201277	0.162846	2.66266e-08	4.73471e-07	65.2163	3.14943e-10	4.21914e-09	YGL076C
0.750351	0.941451	-1.6918	4.95703	6.21949	-11.1765	8.5984e-05	0.000283835	5.4941e-06	4.8327e-05	7.9322e-10	2.82303e-08	64.8613	3.30198e-10	4.36307e-09	YDL022C-A
-0.858074	0.299256	0.558818	-11.0379	3.8495	7.18839	9.76737e-10	2.8483e-08	0.00107018	0.00300824	7.61478e-07	6.7514e-06	64.9157	3.27808e-10	4.36307e-09	YDR064W
1.40628	-0.552353	-0.853928	11.1136	-4.36514	-6.74843	8.71624e-10	2.56895e-08	0.000328777	0.00119685	1.83911e-06	1.35819e-05	64.8401	3.31134e-10	4.36307e-09	YPR158W
-0.995016	1.42116	-0.426146	-7.63001	10.8978	-3.26779	3.22606e-07	2.97366e-06	1.20775e-09	5.78214e-08	0.00402336	0.0064547	64.6851	3.38074e-10	4.43189e-09	YNL065W
-1.54631	1.53903	0.00727967	-9.67602	9.63047	0.0455525	8.40795e-09	1.54851e-07	9.06799e-09	3.1029e-07	0.964139	0.421105	64.2425	3.58783e-10	4.6826e-09	YNL160W
0.531825	0.105847	-0.637673	8.65262	1.7221	-10.3747	4.87779e-08	6.35249e-07	0.10119	0.0979226	2.71696e-09	7.88616e-08	63.9306	3.7422e-10	4.85284e-09	YCL047C
-0.360912	-0.392862	0.753774	-5.30892	-5.7789	11.0878	3.92503e-05	0.000148636	1.40522e-05	0.000102533	9.06012e-10	3.11416e-08	63.6035	3.91196e-10	5.04714e-09	YFR030W
1.09219	-1.41077	0.318582	8.16446	-10.5459	2.38149	1.18158e-07	1.28004e-06	2.07701e-09	9.78424e-08	0.0277842	0.0308436	63.2682	4.09493e-10	5.25228e-09	YHR214W-A
-0.712792	0.709089	0.00370267	-9.57574	9.52599	0.0497421	9.93327e-09	1.77782e-07	1.07944e-08	3.57294e-07	0.960844	0.420322	62.8872	4.31432e-10	5.50641e-09	YMR031C
0.0915393	-0.858684	0.767144	1.06905	-10.0282	8.95912	0.298361	0.192493	4.72544e-09	1.91069e-07	2.84256e-08	4.99191e-07	62.7257	4.41125e-10	5.60542e-09	YJR010W
1.18745	-0.692488	-0.49496	10.9591	-6.39108	-4.56806	1.10028e-09	3.1066e-08	3.83669e-06	3.69126e-05	0.000207077	0.000595472	62.6714	4.44435e-10	5.61491e-09	YLR157C
-1.1043	0.57791	0.526395	-10.9939	5.7534	5.24054	1.04379e-09	2.99865e-08	1.48479e-05	0.000106339	4.56683e-05	0.000178011	62.539	4.52628e-10	5.69979e-09	YPR002W
-0.436449	-0.055637	0.492085	-8.89131	-1.13343	10.0247	3.20003e-08	4.45571e-07	0.271044	0.200834	4.75183e-09	1.23691e-07	62.3335	4.65672e-10	5.8339e-09	YLR410W
0.0976757	-1.06442	0.966741	0.909079	-9.90665	8.99757	0.374625	0.227584	5.75578e-09	2.24632e-07	2.65858e-08	4.73471e-07	62.0195	4.86411e-10	6.05386e-09	YDR380W
0.160353	0.983266	-1.14362	1.41656	8.68618	-10.1027	0.1727	0.128823	4.59518e-08	1.1445e-06	4.19026e-09	1.10128e-07	61.8806	4.95911e-10	6.14769e-09	YIL056W
-0.72891	0.897827	-0.168917	-8.34809	10.2827	-1.93458	8.44023e-08	9.84224e-07	3.14321e-09	1.35044e-07	0.0679786	0.0629293	61.7583	5.04451e-10	6.21592e-09	YDL022W
-0.853211	0.836909	0.0163027	-9.53593	9.35374	0.182207	1.06162e-08	1.83128e-07	1.44276e-08	4.33517e-07	0.857338	0.394104	61.5146	5.21938e-10	6.4062e-09	YPL265W
-0.811806	0.151501	0.660306	-10.2433	1.91163	8.33172	3.34601e-09	7.36856e-08	0.0710293	0.074925	8.69566e-08	1.23234e-06	61.3555	5.33721e-10	6.52134e-09	YLR441C
-0.868904	0.248216	0.620688	-10.5392	3.0107	7.52852	2.09895e-09	4.93896e-08	0.00715367	0.012927	3.92082e-07	3.96561e-06	60.9487	5.65205e-10	6.85712e-09	YKL180W
-0.445202	-0.251917	0.69712	-6.84533	-3.87342	10.7188	1.51109e-06	1.01834e-05	0.00101314	0.00286931	1.58886e-09	5.0814e-08	60.9266	5.66974e-10	6.85712e-09	YPL160W
1.93904	-0.58932	-1.34972	10.577	-3.2146	-7.36241	1.97894e-09	4.73633e-08	0.00453526	0.00911452	5.41154e-07	5.12282e-06	60.8086	5.76516e-10	6.94435e-09	YFL051C
-0.742101	0.253742	0.488359	-10.6456	3.63999	7.00563	1.77895e-09	4.40864e-08	0.00172797	0.00432428	1.09486e-06	9.01605e-06	60.5487	5.9817e-10	7.16249e-09	YKR094C
-0.599067	0.229883	0.369186	-10.7161	4.11213	6.60398	1.59543e-09	4.14628e-08	0.000586409	0.0018841	2.47064e-06	1.70676e-05	60.445	6.07063e-10	7.2355e-09	YML059C
-0.815539	0.862304	-0.0467643	-9.08177	9.60253	-0.520763	2.29771e-08	3.51754e-07	9.49943e-09	3.17779e-07	0.608511	0.315571	60.3077	6.19059e-10	7.33221e-09	YJR048W
-1.02474	0.601296	0.423449	-10.7444	6.30453	4.43983	1.52745e-09	4.11738e-08	4.5962e-06	4.24799e-05	0.000277271	0.000752685	60.2878	6.20822e-10	7.33221e-09	YNL134C
1.04433	-0.551435	-0.492898	10.7887	-5.69669	-5.09197	1.42692e-09	3.88563e-08	1.67873e-05	0.000118171	6.35644e-05	0.000231691	60.2449	6.24633e-10	7.34463e-09	YHR046C
-0.721901	0.483412	0.238489	-10.5768	7.08265	3.49419	1.97944e-09	4.73633e-08	9.38985e-07	1.28495e-05	0.0024091	0.00426115	60.061	6.41272e-10	7.49729e-09	YGR281W
-0.66793	-0.168053	0.835984	-8.12814	-2.04506	10.1732	1.26354e-07	1.35112e-06	0.0548613	0.0618121	3.74237e-09	9.9228e-08	59.8888	6.57301e-10	7.64852e-09	YER070W
-0.929204	0.242015	0.687188	-10.3685	2.70052	7.66798	2.74378e-09	6.2857e-08	0.0141215	0.0217931	3.00013e-07	3.18379e-06	59.8383	6.62084e-10	7.67089e-09	YBR048W
-0.253219	-0.54235	0.79557	-3.34892	-7.17281	10.5217	0.00334966	0.00573735	7.85281e-07	1.11376e-05	2.157e-09	6.6029e-08	59.7607	6.69516e-10	7.72764e-09	YKL029C
-0.592647	0.201096	0.391553	-10.5493	3.57956	6.96973	2.06629e-09	4.90966e-08	0.00198345	0.00481164	1.17642e-06	9.67512e-06	59.5215	6.92996e-10	7.95609e-09	YEL021W
-1.58126	0.809524	0.771739	-10.7163	5.48619	5.23012	1.59489e-09	4.14628e-08	2.65657e-05	0.000169224	4.67367e-05	0.000180655	59.3885	7.06443e-10	8.06815e-09	YLR258W
0.159682	-0.674931	0.515247	2.41406	-10.2036	7.78947	0.0259624	0.0300132	3.56522e-09	1.51375e-07	2.38123e-07	2.67735e-06	58.8109	7.68278e-10	8.73661e-09	YMR108W
1.4038	-0.725559	-0.678241	10.647	-5.50292	-5.14404	1.77523e-09	4.40864e-08	2.56091e-05	0.000163283	5.65951e-05	0.000209998	58.6335	7.8845e-10	8.92338e-09	YLR157W-E
0.617789	-0.321075	-0.296713	10.6395	-5.52954	-5.10998	1.7958e-09	4.41907e-08	2.41599e-05	0.000157695	6.10602e-05	0.00022462	58.5598	7.97009e-10	8.98446e-09	YBR112C
1.23253	0.121159	-1.35369	8.72845	0.858016	-9.58647	4.26315e-08	5.70461e-07	0.401512	0.263462	9.75712e-09	2.14441e-07	58.1927	8.41168e-10	9.43776e-09	YKL044W
0.736365	-0.225973	-0.510391	10.3331	-3.171	-7.16213	2.9015e-09	6.59866e-08	0.00500182	0.00979073	8.02029e-07	7.04844e-06	57.9524	8.71533e-10	9.74176e-09	YLR214W
-0.176753	-0.817275	0.994028	-1.75779	-8.12768	9.88547	0.0947832	0.0811731	1.26461e-07	2.58046e-06	5.95817e-09	1.48333e-07	57.5202	9.29242e-10	1.03322e-08	YER073W
-0.585046	0.68117	-0.0961247	-8.35897	9.73237	-1.3734	8.27477e-08	9.72504e-07	7.66011e-09	2.7784e-07	0.185519	0.134852	57.3844	9.48227e-10	1.04502e-08	YBL064C
0.380907	0.337916	-0.718824	5.58081	4.95092	-10.5317	2.15999e-05	9.0363e-05	8.71705e-05	0.000429797	2.12354e-09	6.55184e-08	57.4179	9.43506e-10	1.04502e-08	YMR256C
-0.643404	0.760091	-0.116687	-8.27227	9.77252	-1.50025	9.69278e-08	1.08591e-06	7.16967e-09	2.63238e-07	0.149881	0.114563	57.2831	9.62689e-10	1.05688e-08	YPR026W
-0.357772	-0.332548	0.69032	-5.44881	-5.06466	10.5135	2.8837e-05	0.00011417	6.75636e-05	0.000349077	2.18506e-09	6.62262e-08	57.1761	9.78211e-10	1.06864e-08	YDR097C
-1.82132	1.2719	0.549426	-10.2386	7.14997	3.0886	3.37162e-09	7.36856e-08	8.21573e-07	1.14568e-05	0.00601455	0.00892612	57.0439	9.97777e-10	1.08573e-08	YDR342C
-0.249212	0.597158	-0.347944	-4.36077	10.4492	-6.08839	0.000332076	0.000861348	2.41653e-09	1.10386e-07	7.24674e-06	4.06165e-05	56.9683	1.00916e-09	1.08927e-08	YHR080C
0.118061	0.668904	-0.786964	1.45961	8.26979	-9.72939	0.160634	0.122001	9.73703e-08	2.15607e-06	7.69786e-09	1.79665e-07	56.9374	1.01385e-09	1.08927e-08	YPR149W
-0.993999	0.438111	0.555889	-10.4677	4.61372	5.85404	2.34717e-09	5.43557e-08	0.000186675	0.00077286	1.19522e-05	6.11379e-05	56.9199	1.01652e-09	1.09531e-08	YDR275W
-0.545311	0.630662	-0.0853527	-8.35209	9.65935	-1.30728	8.37905e-08	9.81316e-07	8.64357e-09	3.02454e-07	0.206622	0.14604	56.7956	1.0357e-09	1.112e-08	YNL115C
0.554132	-0.0185177	-0.535616	9.21781	-0.308035	-8.90979	1.81853e-08	2.8142e-07	0.761386	0.395886	3.0982e-08	5.38165e-07	56.6846	1.05317e-09	1.11789e-08	YDR151C
-0.834996	0.228929	0.606067	-10.1303	2.77741	7.35292	4.00858e-09	8.50224e-08	0.0119517	0.0192515	5.51263e-07	5.20001e-06	56.6693	1.0556e-09	1.12374e-08	YML024W
-0.503646	-0.074608	0.578255	-8.33822	-1.23519	9.57342	8.59334e-08	9.93438e-07	0.231724	0.179937	9.9717e-09	2.17357e-07	56.083	1.15369e-09	1.20886e-08	YGL245W
0.971729	-0.0871063	-0.884623	9.41512	-0.843977	-8.57115	1.30053e-08	2.17866e-07	0.409118	0.266682	5.64189e-08	8.71518e-07	56.1242	1.14648e-09	1.20886e-08	YPR124W
0.856088	-0.112079	-0.744009	9.51066	-1.24513	-8.26552	1.10751e-08	1.90589e-07	0.228128	0.178016	9.81326e-08	1.32005e-06	55.2626	1.30825e-09	1.37126e-08	YOR303W
0.285888	-0.530553	0.244665	5.56266	-10.3232	4.76056	2.24724e-05	9.34298e-05	2.94741e-09	1.28711e-07	0.000133851	0.000417551	55.212	1.31851e-09	1.37595e-08	YGL256W
-0.960294	-0.0474057	1.0077	-8.71566	-0.430256	9.14593	4.36084e-08	5.81072e-07	0.67182	0.367548	2.05713e-08	3.85533e-07	55.0813	1.34542e-09	1.40136e-08	YOL058W
-1.76688	0.873208	0.893671	-10.2903	5.08556	5.20474	3.10536e-09	6.908e-08	6.44804e-05	0.000341264	4.9446e-05	0.000188252	54.7526	1.41579e-09	1.4679e-08	YDR042C
0.546209	0.114229	-0.660438	7.95089	1.66277	-9.61367	1.75712e-07	1.81763e-06	0.112665	0.105961	9.32496e-09	2.06386e-07	54.6015	1.44951e-09	1.49272e-08	YNL202W
-0.906524	0.309325	0.5972	-10.1027	3.44725	6.65546	4.1905e-09	8.81709e-08	0.00268033	0.00601283	2.22323e-06	1.57265e-05	54.546	1.46211e-09	1.49683e-08	YGL103W
-0.926366	0.280665	0.6457	-10.0136	3.03386	6.97972	4.83822e-09	9.96023e-08	0.00679472	0.0123899	1.15312e-06	9.48445e-06	54.5286	1.46608e-09	1.50091e-08	YDR418W
1.015	0.0538987	-1.0689	8.64721	0.459187	-9.1064	4.92509e-08	6.35843e-07	0.651278	0.360487	2.20206e-08	4.0705e-07	54.4317	1.48845e-09	1.51512e-08	YBR240C
-0.90483	0.215581	0.689248	-9.80371	2.33579	7.46791	6.81143e-09	1.32357e-07	0.0305418	0.0397867	4.40815e-07	4.34635e-06	54.2341	1.53523e-09	1.55959e-08	YGL031C
-0.64766	-0.119967	0.767626	-8.01093	-1.48388	9.49479	1.57068e-07	1.65189e-06	0.15414	0.133769	1.13738e-08	2.37487e-07	53.9548	1.60416e-09	1.6138e-08	YMR199W
-0.0347817	0.982085	-0.947303	-0.318629	8.99671	-8.67808	0.753462	0.362203	2.66257e-08	7.28002e-07	4.66175e-08	7.40425e-07	53.894	1.61962e-09	1.62738e-08	YMR323W
-0.885717	0.209611	0.676106	-9.73357	2.30351	7.43005	7.64493e-09	1.42549e-07	0.03264	0.0417231	4.74395e-07	4.61264e-06	53.5157	1.71952e-09	1.71401e-08	YDR450W
0.610162	-0.496868	-0.113294	9.56332	-7.7876	-1.77571	1.01414e-08	1.77782e-07	2.38965e-07	4.04223e-06	0.0917003	0.0794005	53.5167	1.71926e-09	1.71401e-08	YOR222W
-0.937916	0.356362	0.581552	-10.0731	3.8273	6.24581	4.39481e-09	9.10109e-08	0.00112599	0.00313584	5.19833e-06	3.13152e-05	53.4716	1.73161e-09	1.71711e-08	YGL135W
1.22198	-0.657551	-0.564431	10.1503	-5.46189	-4.6884	3.88226e-09	8.2894e-08	2.80201e-05	0.000174886	0.000157593	0.000476566	53.3736	1.7588e-09	1.73996e-08	YAR027W
0.113442	0.520878	-0.63432	1.69647	7.78951	-9.48598	0.106018	0.0884399	2.38104e-07	4.04223e-06	1.15433e-08	2.37809e-07	52.9243	1.88966e-09	1.86109e-08	YLR176C
-0.833201	0.390715	0.442487	-10.0896	4.73132	5.35824	4.28005e-09	8.93926e-08	0.000143001	0.000625741	3.51988e-05	0.000144729	52.7026	1.95814e-09	1.92242e-08	YKL056C
-1.87274	1.24468	0.628058	-9.90922	6.58598	3.32324	5.73176e-09	1.15148e-07	2.56369e-06	2.76235e-05	0.00355	0.00583508	52.6049	1.98921e-09	1.94419e-08	YDR343C
0.252046	-0.610182	0.358136	4.14252	-10.0287	5.88617	0.000546985	0.00130509	4.72139e-09	1.91069e-07	1.11552e-05	5.79012e-05	52.5259	2.01472e-09	1.95606e-08	YBR079C
-0.520645	0.392732	0.127912	-9.67006	7.29431	2.37574	8.49137e-09	1.55303e-07	6.18238e-07	9.3493e-06	0.0281182	0.0311179	52.5186	2.0171e-09	1.95814e-08	YHR001W
0.593663	-0.399225	-0.194437	9.87669	-6.64186	-3.23482	6.04418e-09	1.19045e-07	2.286e-06	2.55338e-05	0.00433353	0.00685436	52.4379	2.04355e-09	1.96986e-08	YJR003C
-0.437874	-0.0145623	0.452438	-8.56072	-0.284703	8.84545	5.7484e-08	7.24899e-07	0.778932	0.400417	3.4681e-08	5.84362e-07	52.2592	2.10352e-09	2.01997e-08	YHR064C
-0.517954	1.02185	-0.503897	-5.09446	10.0507	-4.95621	6.32117e-05	0.000217298	4.55686e-09	1.90667e-07	8.61424e-05	0.000292797	52.2332	2.11241e-09	2.02179e-08	YLR180W
-0.329579	0.881749	-0.552169	-3.71565	9.94078	-6.22512	0.00145366	0.00291853	5.44471e-09	2.15491e-07	5.42939e-06	3.22855e-05	52.1794	2.13094e-09	2.03313e-08	YLR120C
0.523511	-0.0471177	-0.476393	9.06997	-0.816327	-8.25363	2.34504e-08	3.55516e-07	0.424368	0.273864	1.00293e-07	1.33921e-06	52.0677	2.16998e-09	2.0634e-08	YOR081C
-0.505084	1.0864	-0.581316	-4.65993	10.0232	-5.36325	0.000168095	0.000492622	4.76371e-09	1.91069e-07	3.48124e-05	0.000144138	52.0299	2.18335e-09	2.06503e-08	YBR183W
-0.617049	-0.379894	0.996943	-6.14314	-3.7821	9.92523	6.45376e-06	3.32447e-05	0.00124871	0.00337761	5.58417e-09	1.41377e-07	51.8951	2.23182e-09	2.10439e-08	YDR451C
-0.815637	0.144829	0.670809	-9.38308	1.66611	7.71698	1.37286e-08	2.2688e-07	0.11199	0.105524	2.73253e-07	2.97585e-06	51.8322	2.25489e-09	2.1073e-08	YGR034W
1.18759	-0.862664	-0.324927	9.68798	-7.03733	-2.65065	8.24309e-09	1.52726e-07	1.02769e-06	1.38431e-05	0.015724	0.0196103	51.8449	2.25019e-09	2.1073e-08	YLR157W-D
-0.769196	0.259389	0.509807	-9.83092	3.31519	6.51572	6.51414e-09	1.27411e-07	0.00361517	0.00761623	2.96299e-06	1.97733e-05	51.7364	2.29046e-09	2.13673e-08	YNL301C
-0.704657	0.861808	-0.157151	-7.67446	9.386	-1.71154	2.96321e-07	2.76142e-06	1.36611e-08	4.2086e-07	0.103156	0.0869207	51.6783	2.31232e-09	2.14735e-08	YKL037W
0.394116	0.225383	-0.619497	6.27427	3.58806	-9.86231	4.89698e-06	2.66288e-05	0.00194537	0.00473451	6.18788e-09	1.52705e-07	51.5343	2.36757e-09	2.19494e-08	YJR058C
-0.772019	0.0808093	0.691211	-9.06956	0.949336	8.12024	2.34667e-08	3.55516e-07	0.354296	0.242524	1.28212e-07	1.64375e-06	51.3932	2.42309e-09	2.2247e-08	YBL027W
-1.09409	0.938162	0.155927	-9.21711	7.90351	1.3136	1.82071e-08	2.8142e-07	1.9204e-07	3.38025e-06	0.204525	0.144667	51.4103	2.41631e-09	2.2247e-08	YKR049C
-0.52711	-0.0313003	0.558411	-8.32242	-0.494193	8.81662	8.84438e-08	1.00983e-06	0.626799	0.352118	3.64844e-08	6.074e-07	50.7532	2.69377e-09	2.46382e-08	YDR127W
-0.8569	0.323728	0.533173	-9.79849	3.70177	6.09673	6.87006e-09	1.32602e-07	0.00150055	0.00388098	7.11978e-06	4.01281e-05	50.6304	2.7494e-09	2.50955e-08	YPL220W
-0.858811	0.776764	0.0820487	-8.96224	8.10602	0.85623	2.82716e-08	4.04104e-07	1.31631e-07	2.617e-06	0.402474	0.236933	50.5887	2.76861e-09	2.51858e-08	YDR074W
0.28398	0.653908	-0.937889	2.91845	6.7202	-9.63867	0.00877352	0.01256	1.9479e-06	2.2579e-05	8.94541e-09	2.01364e-07	50.5266	2.79746e-09	2.5366e-08	YOL151W
-0.23575	0.591408	-0.355658	-3.90971	9.808	-5.89829	0.000932334	0.00201651	6.76367e-09	2.5439e-07	1.08691e-05	5.66628e-05	50.4198	2.84787e-09	2.57224e-08	YGL191W
0.482207	0.716622	-1.19883	3.94579	5.86395	-9.80975	0.000858383	0.00189016	1.17004e-05	8.93991e-05	6.74428e-09	1.6201e-07	50.3901	2.86206e-09	2.57224e-08	YGR144W
-0.901036	0.809921	0.0911143	-8.9635	8.05709	0.906405	2.82095e-08	4.04104e-07	1.44136e-07	2.70948e-06	0.376003	0.225893	50.3544	2.87922e-09	2.58091e-08	YBR001C
0.330164	1.15568	-1.48584	2.08689	7.30479	-9.39167	0.0505212	0.0502473	6.05674e-07	9.21406e-06	1.35306e-08	2.69267e-07	50.2978	2.90665e-09	2.59845e-08	YHR096C
-0.808	0.944577	-0.136577	-7.79336	9.11068	-1.31732	2.36373e-07	2.3014e-06	2.18587e-08	6.33646e-07	0.203302	0.144091	50.1453	2.98203e-09	2.65088e-08	YBR182C-A
-0.573718	0.764285	-0.190566	-7.09965	9.45789	-2.35822	9.07781e-07	6.79481e-06	1.21013e-08	3.95951e-07	0.0291582	0.0320324	50.1252	2.99214e-09	2.65088e-08	YMR173W
0.745523	0.155506	-0.90103	7.60801	1.58693	-9.19496	3.36497e-07	3.05317e-06	0.128928	0.117269	1.89109e-08	3.66575e-07	49.963	3.07499e-09	2.71216e-08	YOL104C
-0.75417	0.53948	0.21469	-9.53627	6.82158	2.7147	1.06102e-08	1.83128e-07	1.58543e-06	1.96178e-05	0.0136949	0.0175626	49.9274	3.09353e-09	2.72018e-08	YPL154C
-1.43803	2.26333	-0.825293	-6.16098	9.6968	-3.53581	6.21503e-06	3.22374e-05	8.12373e-09	2.87595e-07	0.00219135	0.00396129	49.8045	3.15846e-09	2.77201e-08	YOR134W
-0.357253	0.658212	-0.300958	-5.31368	9.79006	-4.47636	3.88395e-05	0.000147743	6.96592e-09	2.59055e-07	0.000255121	0.00070411	49.6772	3.22729e-09	2.82347e-08	YGL237C
-1.07972	0.605255	0.474467	-9.76935	5.47637	4.29299	7.20727e-09	1.37843e-07	2.71443e-05	0.000171398	0.000387685	0.000975227	49.5883	3.27631e-09	2.8472e-08	YLR267W
-0.290971	1.17705	-0.886083	-2.3239	9.40078	-7.07688	0.0313	0.0346796	1.33241e-08	4.12785e-07	9.49827e-07	7.9921e-06	49.5873	3.2769e-09	2.8472e-08	YMR206W
0.578357	-0.322456	-0.255903	9.76663	-5.44526	-4.32139	7.23956e-09	1.37843e-07	2.90622e-05	0.00017977	0.000363325	0.000930597	49.5373	3.30484e-09	2.85461e-08	YBR107C
-0.616966	-0.515676	1.13264	-5.31088	-4.43897	9.74985	3.90808e-05	0.00014828	0.000277814	0.00104971	7.44238e-09	1.77321e-07	49.2812	3.45219e-09	2.97404e-08	YOR108W
-0.215752	-0.623569	0.839321	-2.41518	-6.98038	9.39556	0.0259018	0.0299804	1.1516e-06	1.49875e-05	1.34421e-08	2.69182e-07	49.235	3.47957e-09	2.98956e-08	YKR077W
-0.955994	0.738056	0.217939	-9.30038	7.18017	2.12022	1.57958e-08	2.54139e-07	7.73943e-07	1.1096e-05	0.0472887	0.0474126	49.1357	3.53918e-09	3.02881e-08	YKL093W
-0.336475	-0.294992	0.631468	-5.18948	-4.54968	9.73918	5.11517e-05	0.000183948	0.000215911	0.000858663	7.57454e-09	1.78903e-07	49.1132	3.55284e-09	3.02881e-08	YNL104C
-0.371244	-0.331072	0.702318	-5.14164	-4.58527	9.72693	5.68992e-05	0.00019981	0.000199134	0.000806864	7.72917e-09	1.79665e-07	48.9727	3.63947e-09	3.09499e-08	YCR072C
-0.897931	0.229844	0.668087	-9.35452	2.39448	6.96004	1.44086e-08	2.35683e-07	0.0270439	0.0362981	1.1995e-06	9.7538e-06	48.8377	3.72488e-09	3.15226e-08	YLR150W
-0.310073	0.650071	-0.339998	-4.62605	9.69856	-5.07251	0.000181523	0.000522134	8.10001e-09	2.87595e-07	6.63885e-05	0.00023941	48.6688	3.8349e-09	3.23447e-08	YGR111W
0.381052	-0.639262	0.25821	5.74413	-9.6365	3.89236	1.51484e-05	6.65527e-05	8.97772e-09	3.1029e-07	0.000970121	0.00205173	48.605	3.87743e-09	3.26562e-08	YGR065C
0.0108553	-0.465793	0.454939	0.19783	-8.48871	8.29089	0.845266	0.388901	6.54272e-08	1.5382e-06	9.36827e-08	1.29811e-06	48.5459	3.91724e-09	3.28818e-08	YNL221C
-0.905	0.348266	0.556733	-9.58841	3.68985	5.89854	9.72561e-09	1.75689e-07	0.00154197	0.00395413	1.08631e-05	5.66628e-05	48.3767	4.03378e-09	3.36911e-08	YLR287C-A
0.476055	-0.354743	-0.121313	9.29206	-6.92418	-2.36789	1.60209e-08	2.55885e-07	1.28905e-06	1.63176e-05	0.0285798	0.0314954	48.221	4.14442e-09	3.44949e-08	YKR043C
-0.867468	0.363182	0.504287	-9.6107	4.0237	5.58701	9.37107e-09	1.70287e-07	0.000718059	0.00220361	2.13095e-05	9.74032e-05	48.1786	4.17515e-09	3.47121e-08	YPL143W
-0.275775	-0.26803	0.543804	-4.89146	-4.75409	9.64554	9.96347e-05	0.000320776	0.000135824	0.000601328	8.84391e-09	2.00493e-07	48.1074	4.22723e-09	3.50106e-08	YJL080C
-0.224193	-0.414488	0.63868	-3.33297	-6.16199	9.49495	0.00347275	0.00590671	6.20181e-06	5.31775e-05	1.13708e-08	2.37487e-07	47.9932	4.31237e-09	3.55546e-08	YDL055C
-0.423608	0.953286	-0.529679	-4.27063	9.61062	-5.34	0.000408015	0.0010196	9.37242e-09	3.16952e-07	3.66451e-05	0.000149393	47.9536	4.34233e-09	3.55666e-08	YDR533C
1.41037	0.152055	-1.56243	7.88405	0.849993	-8.73404	1.99194e-07	1.98911e-06	0.405847	0.265179	4.22111e-08	6.82075e-07	47.9696	4.33021e-09	3.55666e-08	YER150W
0.06401	-0.47683	0.41282	1.18958	-8.86155	7.67197	0.248774	0.168789	3.3714e-08	8.97832e-07	2.97734e-07	3.17454e-06	47.8445	4.42606e-09	3.61851e-08	YPR145W
-0.749934	0.132571	0.617364	-9.00833	1.59246	7.41588	2.60936e-08	3.80454e-07	0.127678	0.116685	4.87635e-07	4.70972e-06	47.8031	4.4583e-09	3.61928e-08	YMR142C
-0.72947	0.700137	0.0293333	-8.49345	8.15191	0.341537	6.48706e-08	8.00169e-07	1.20925e-07	2.54738e-06	0.736424	0.358496	47.8126	4.45084e-09	3.61928e-08	YNL015W
-0.440086	-0.247371	0.687459	-6.05731	-3.4048	9.46212	7.7409e-06	3.88213e-05	0.00295141	0.00648563	1.20154e-08	2.46337e-07	47.5047	4.6985e-09	3.78936e-08	YBR069C
1.1663	-0.527851	-0.638451	9.57043	-4.33143	-5.23899	1.00216e-08	1.77782e-07	0.000355086	0.0012711	4.58258e-05	0.000178154	47.4998	4.70252e-09	3.78936e-08	YLR159W
-0.542191	0.398969	0.143224	-9.23627	6.79646	2.43983	1.76202e-08	2.76729e-07	1.66821e-06	2.03512e-05	0.0246009	0.0281703	47.3798	4.80321e-09	3.8575e-08	YBL047C
-0.824872	0.412918	0.411953	-9.56591	4.78854	4.77735	1.00976e-08	1.77782e-07	0.000125652	0.000568842	0.000128868	0.000405393	47.3131	4.86018e-09	3.89316e-08	YDR506C
-0.918315	0.405403	0.512913	-9.5404	4.21174	5.32866	1.05373e-08	1.83128e-07	0.000466845	0.0015845	3.75742e-05	0.00015215	47.2762	4.89208e-09	3.90463e-08	YEL034W
0.757601	-0.311412	-0.446189	9.50067	-3.90525	-5.59541	1.12623e-08	1.9284e-07	0.000941912	0.00270837	2.09229e-05	9.58858e-05	47.1623	4.99185e-09	3.97175e-08	YMR177W
-0.800106	0.567136	0.232969	-9.26328	6.56605	2.69721	1.68261e-08	2.67153e-07	2.67098e-06	2.84033e-05	0.0142227	0.0181155	46.9466	5.18703e-09	4.11779e-08	YJR073C
0.870554	-0.287778	-0.582775	9.32944	-3.08402	-6.2454	1.50348e-08	2.42665e-07	0.00607631	0.0113762	5.20278e-06	3.13152e-05	46.7254	5.39595e-09	4.26517e-08	YAR031W
-0.639776	-0.730838	1.37061	-4.43325	-5.06425	9.49749	0.000281461	0.000754974	6.76255e-05	0.000349077	1.13224e-08	2.37487e-07	46.7074	5.4133e-09	4.26517e-08	YNL289W
0.586339	-0.779339	0.192999	6.85019	-9.10501	2.25481	1.49632e-06	1.01649e-05	2.20733e-08	6.33646e-07	0.0360595	0.0382638	46.5033	5.61507e-09	4.4107e-08	YGL117W
0.159746	-0.745623	0.585876	1.92922	-9.00475	7.07551	0.0686803	0.0634384	2.62565e-08	7.26395e-07	9.52412e-07	7.9921e-06	46.4894	5.6291e-09	4.4107e-08	YKR069W
-0.631057	0.320941	0.310118	-9.47525	4.81889	4.65638	1.17531e-08	2.00152e-07	0.000117333	0.000540115	0.000169454	0.000506485	46.4253	5.69444e-09	4.44373e-08	YDL072C
-0.552151	0.936745	-0.384593	-5.55093	9.41735	-3.86642	2.30561e-05	9.50749e-05	1.29564e-08	4.11968e-07	0.00102952	0.00216394	46.3441	5.77827e-09	4.49991e-08	YBR105C
-0.902998	0.21735	0.685647	-9.04282	2.17659	6.86622	2.45786e-08	3.64281e-07	0.042245	0.0507705	1.44868e-06	1.13591e-05	46.0706	6.07095e-09	4.71096e-08	YBR191W
0.324504	-0.666596	0.342091	4.58696	-9.42252	4.83556	0.00019837	0.000563641	1.2844e-08	4.11968e-07	0.000113005	0.000363671	45.9161	6.24348e-09	4.82786e-08	YER052C
0.0801183	-0.59717	0.517052	1.16432	-8.67839	7.51406	0.258617	0.173563	4.65923e-08	1.14993e-06	4.03175e-07	4.04777e-06	45.89	6.27311e-09	4.82882e-08	YJR030C
1.36911	-0.781793	-0.587313	9.38877	-5.36121	-4.02755	1.35972e-08	2.26565e-07	3.49691e-05	0.000208239	0.000711761	0.00159372	45.8837	6.28035e-09	4.82882e-08	YLR155C
0.495973	0.201983	-0.697957	6.50202	2.64792	-9.14995	3.04808e-06	1.80469e-05	0.0158165	0.0236661	2.04296e-08	3.85046e-07	45.848	6.32117e-09	4.84462e-08	YJR151C
0.285589	-0.719434	0.433846	3.70958	-9.34487	5.63531	0.001474	0.00295512	1.46462e-08	4.35186e-07	1.91814e-05	8.96961e-05	45.7911	6.38695e-09	4.87594e-08	YKR071C
-0.207437	0.448863	-0.241425	-4.34447	9.40079	-5.05631	0.000344667	0.000889063	1.33238e-08	4.12785e-07	6.8837e-05	0.000245234	45.7812	6.39854e-09	4.87594e-08	YPR198W
0.783373	-0.326794	-0.456577	9.33856	-3.8957	-5.44284	1.48038e-08	2.40822e-07	0.000962736	0.00275509	2.92171e-05	0.000124993	45.5034	6.73139e-09	5.08015e-08	YIL167W
0.0134357	-0.861599	0.848162	0.127636	-8.18501	8.05736	0.89977	0.402722	1.13767e-07	2.43405e-06	1.44065e-07	1.80794e-06	45.4766	6.76459e-09	5.08015e-08	YKL001C
-0.897017	0.288675	0.608341	-9.19058	2.95768	6.23289	1.90534e-08	2.93714e-07	0.00804555	0.0141315	5.34141e-06	3.18852e-05	45.522	6.70862e-09	5.08015e-08	YKR059W
-0.651226	0.425516	0.225711	-9.24026	6.03765	3.20261	1.75004e-08	2.76712e-07	8.07127e-06	6.59063e-05	0.00465907	0.00727536	45.5319	6.69641e-09	5.08015e-08	YMR315W
-0.864152	0.452378	0.411773	-9.37451	4.9075	4.467	1.39291e-08	2.28838e-07	9.61054e-05	0.000461423	0.000260619	0.000717173	45.4722	6.77004e-09	5.08015e-08	YOR317W
0.626505	0.254995	-0.8815	6.45689	2.62803	-9.08493	3.34647e-06	1.95099e-05	0.0165064	0.0244192	2.28519e-08	4.18199e-07	45.2016	7.11503e-09	5.32674e-08	YOR062C
0.593897	0.251559	-0.845455	6.37808	2.70158	-9.07965	3.94197e-06	2.21101e-05	0.0140891	0.0217628	2.30613e-08	4.1913e-07	44.9549	7.44643e-09	5.55694e-08	YOR065W
-0.0633513	0.538475	-0.475123	-1.00331	8.52792	-7.5246	0.328243	0.207561	6.09696e-08	1.46914e-06	3.95062e-07	3.98164e-06	44.9319	7.47824e-09	5.56266e-08	YDR185C
1.05984	-0.306043	-0.753802	9.04766	-2.61262	-6.43504	2.43732e-08	3.64281e-07	0.0170604	0.0250542	3.50168e-06	2.24731e-05	44.8437	7.60146e-09	5.63508e-08	YIR044C
-0.517812	-0.274852	0.792663	-5.98673	-3.17773	9.16446	8.99586e-06	4.41907e-05	0.00492686	0.00967546	1.99266e-08	3.80719e-07	44.7853	7.68428e-09	5.6775e-08	YDR170W-A
-0.354751	-0.153016	0.507769	-6.30601	-2.72	9.02603	4.58198e-06	2.51338e-05	0.0135387	0.0211844	2.53042e-08	4.56105e-07	44.3396	8.34995e-09	6.15454e-08	YPL110C
0.962435	-0.118655	-0.843781	8.48015	-1.04548	-7.43467	6.64445e-08	8.15072e-07	0.308838	0.220606	4.70158e-07	4.58959e-06	44.2179	8.54272e-09	6.27602e-08	YGR250C
-0.15264	-0.485376	0.638015	-2.11615	-6.72912	8.84526	0.0476726	0.0480529	1.91283e-06	2.22873e-05	3.46922e-08	5.84362e-07	44.1206	8.70038e-09	6.3748e-08	YOR375C
-0.511545	-0.327401	0.838945	-5.58496	-3.57451	9.15947	2.14051e-05	8.99295e-05	0.00200639	0.00483999	2.00983e-08	3.81947e-07	44.0747	8.77583e-09	6.39579e-08	YOR285W
-0.492065	0.158168	0.333896	-9.04254	2.90661	6.13592	2.45902e-08	3.64281e-07	0.0090056	0.0154747	6.55301e-06	3.73648e-05	44.0749	8.77542e-09	6.39579e-08	YOR336W
-0.745585	1.14033	-0.394748	-5.93002	9.06965	-3.13963	1.01548e-05	4.88821e-05	2.34634e-08	6.60645e-07	0.00536603	0.00812662	43.8734	9.1153e-09	6.6241e-08	YDR033W
-0.974396	1.61211	-0.637708	-5.52648	9.14338	-3.61689	2.43218e-05	9.87074e-05	2.06619e-08	6.07953e-07	0.00182155	0.00340567	43.8542	9.1484e-09	6.62657e-08	YDR040C
-0.622505	0.42681	0.195695	-8.96084	6.14385	2.817	2.83409e-08	4.04104e-07	6.444e-06	5.46136e-05	0.0109627	0.0146049	43.4247	9.92579e-09	7.17061e-08	YDR038C
-0.238213	-0.516028	0.754239	-2.83002	-6.13052	8.96053	0.0106549	0.0147115	6.62818e-06	5.57538e-05	2.83562e-08	4.99191e-07	43.3917	9.98837e-09	7.17954e-08	YHR137W
-0.828486	0.235662	0.592824	-8.88701	2.5279	6.35911	3.22426e-08	4.46136e-07	0.0204341	0.0287466	4.10096e-06	2.56236e-05	43.3655	1.00384e-08	7.17954e-08	YOR293W
-1.01586	1.05211	-0.036248	-7.7869	8.06475	-0.277851	2.39284e-07	2.32257e-06	1.42102e-07	2.70567e-06	0.784109	0.371915	43.3468	1.00743e-08	7.2305e-08	YHL021C
0.304966	1.33274	-1.63771	1.6018	7.00004	-8.60184	0.125593	0.101018	1.10717e-06	1.45925e-05	5.34044e-08	8.34329e-07	43.2795	1.02047e-08	7.28116e-08	YMR107W
-0.147612	0.907647	-0.760035	-1.38515	8.51715	-7.132	0.181955	0.134011	6.21612e-08	1.48615e-06	8.51346e-07	7.36402e-06	43.1995	1.03621e-08	7.38163e-08	YGR292W
-0.777823	0.998029	-0.220208	-6.7798	8.6992	-1.91941	1.72556e-06	1.12863e-05	4.4901e-08	1.12644e-06	0.0699812	0.0641916	43.1995	1.03621e-08	7.38163e-08	YPL201C
-0.38996	-0.0611853	0.451146	-7.2728	-1.14111	8.41392	6.44885e-07	5.20227e-06	0.267915	0.199226	7.48927e-08	1.11452e-06	43.0837	1.05948e-08	7.48096e-08	YDR170C
-0.405127	0.553529	-0.148402	-6.45403	8.81821	-2.36418	3.36639e-06	1.95275e-05	3.63828e-08	9.529e-07	0.0288007	0.0317015	43.0888	1.05845e-08	7.48096e-08	YJR059W
0.055637	-0.517306	0.461669	0.89354	-8.30803	7.41448	0.382678	0.230972	9.07961e-08	2.02486e-06	4.88966e-07	4.70972e-06	43.017	1.07315e-08	7.5302e-08	YGR285C
-0.654874	0.401	0.253873	-9.04154	5.53642	3.50511	2.46332e-08	3.64281e-07	2.37992e-05	0.000156785	0.00235	0.00418028	42.9793	1.08095e-08	7.57917e-08	YIL051C
0.0854677	-0.600209	0.514741	1.19914	-8.42114	7.22199	0.245124	0.167041	7.39201e-08	1.68544e-06	7.12642e-07	6.4064e-06	42.9186	1.09366e-08	7.62786e-08	YJR155W
-0.317901	-0.402672	0.720574	-4.00903	-5.07808	9.08712	0.000742616	0.00168087	6.55679e-05	0.000342272	2.27656e-08	4.18199e-07	42.8924	1.09919e-08	7.67627e-08	YMR307W
-0.631662	0.008358	0.623305	-7.93521	0.104997	7.83023	1.80948e-07	1.85558e-06	0.917472	0.438008	2.2046e-07	2.52537e-06	42.8428	1.10974e-08	7.72442e-08	YOL121C
0.598595	-0.205159	-0.393435	8.95302	-3.0685	-5.8845	2.87299e-08	4.07735e-07	0.00629033	0.0116609	1.11952e-05	5.79012e-05	42.8113	1.11652e-08	7.7723e-08	YDR111C
-0.728929	0.142964	0.585964	-8.57674	1.68215	6.89458	5.5857e-08	7.11135e-07	0.108801	0.103468	1.36816e-06	1.08533e-05	42.7168	1.13709e-08	7.88912e-08	YOR312C
-1.12101	0.458062	0.662947	-9.01935	3.68545	5.3339	2.5599e-08	3.75119e-07	0.00155757	0.00398733	3.71418e-05	0.000150966	42.5294	1.17913e-08	8.14331e-08	YHR007C-A
-0.231527	-0.545019	0.776548	-2.6317	-6.19506	8.82678	0.0163771	0.0207775	5.78396e-06	5.00026e-05	3.5838e-08	5.99297e-07	42.4725	1.19224e-08	8.16707e-08	YBR068C
0.300372	-0.609686	0.309315	4.46557	-9.06408	4.59853	0.000261472	0.000711169	2.36902e-08	6.60645e-07	0.000193227	0.000561385	42.4824	1.18995e-08	8.16707e-08	YOR337W
-0.709512	0.244378	0.465133	-8.9177	3.07154	5.84616	3.05568e-08	4.28207e-07	0.00624789	0.0116036	1.21564e-05	6.19325e-05	42.4451	1.1986e-08	8.21308e-08	YHR141C
-0.14353	-0.661027	0.804557	-1.51308	-6.96847	8.48154	0.146615	0.113887	1.17941e-06	1.53122e-05	6.62775e-08	9.97104e-07	42.3239	1.22723e-08	8.3724e-08	YHR018C
-0.600438	0.653184	-0.052746	-7.4865	8.14416	-0.657658	4.25234e-07	3.67983e-06	1.22668e-07	2.5715e-06	0.518598	0.28287	42.3315	1.22542e-08	8.3724e-08	YNL055C
-0.265323	0.432635	-0.167312	-5.4961	8.96191	-3.46581	2.59951e-05	0.000104852	2.8288e-08	7.60698e-07	0.00256965	0.00449424	42.2374	1.24811e-08	8.48535e-08	YOR219C
-0.950104	0.924149	0.025956	-7.92574	7.70922	0.216524	1.84192e-07	1.87945e-06	2.77319e-07	4.65876e-06	0.830873	0.385849	42.1552	1.26832e-08	8.59769e-08	YLR142W
-1.04302	0.431479	0.611538	-8.96605	3.70911	5.25694	2.80846e-08	4.04104e-07	0.00147558	0.00382626	4.40377e-05	0.000172826	41.9783	1.31307e-08	8.84445e-08	YOR347C
-0.755281	-0.087544	0.842824	-7.33343	-0.850012	8.18344	5.7266e-07	4.68912e-06	0.405837	0.265179	1.14096e-07	1.49817e-06	41.8706	1.34117e-08	9.02255e-08	YPL198W
1.17294	-0.155022	-1.01792	8.27428	-1.09357	-7.18071	9.65719e-08	1.08591e-06	0.28773	0.209012	7.73108e-07	6.8363e-06	41.785	1.36394e-08	9.10798e-08	YHR055C
-0.130572	-0.402524	0.533095	-2.11234	-6.51188	8.6242	0.048035	0.0482374	2.98663e-06	3.05136e-05	5.13131e-08	8.05996e-07	41.7923	1.36199e-08	9.10798e-08	YJL194W
-0.955931	0.250544	0.705387	-8.65298	2.2679	6.38509	4.87468e-08	6.35249e-07	0.0351094	0.0440592	3.88483e-06	2.45211e-05	41.6349	1.40497e-08	9.35072e-08	YGR214W
-0.782544	0.447694	0.334851	-8.91904	5.10259	3.81646	3.04854e-08	4.28207e-07	6.20762e-05	0.000332659	0.00115429	0.00236952	41.4157	1.46733e-08	9.79201e-08	YER043C
0.415933	-1.20611	0.790173	3.03401	-8.79792	5.7639	0.0067924	0.0101388	3.77064e-08	9.78424e-07	1.45146e-05	7.10436e-05	41.3055	1.49984e-08	9.9387e-08	YGL255W
-0.748557	0.221847	0.52671	-8.70063	2.57857	6.12206	4.47874e-08	5.94235e-07	0.0183479	0.0265562	6.74796e-06	3.84278e-05	41.3049	1.50002e-08	9.9387e-08	YIL052C
-0.750221	0.137528	0.612693	-8.3905	1.53812	6.85238	7.8142e-08	9.30135e-07	0.140406	0.12491	1.48972e-06	1.15757e-05	41.2677	1.51119e-08	9.97842e-08	YNL302C
-0.814412	0.331016	0.483396	-8.87962	3.6091	5.27051	3.26627e-08	4.50832e-07	0.00185421	0.00455686	4.27325e-05	0.000168899	41.2436	1.51846e-08	1.00179e-07	YKR053C
-0.871958	0.238099	0.63386	-8.62768	2.35589	6.2718	5.09958e-08	6.54751e-07	0.0292992	0.0385805	4.92244e-06	2.9885e-05	41.1302	1.55321e-08	1.01887e-07	YPL079W
-0.202392	-0.266465	0.468858	-3.83699	-5.0517	8.8887	0.00110129	0.00231572	6.95495e-05	0.000358274	3.21472e-08	5.50465e-07	41.1056	1.56088e-08	1.02006e-07	YLL011W
-0.0992903	-0.438415	0.537705	-1.54723	-6.83179	8.379	0.1382	0.108192	1.55304e-06	1.92824e-05	7.979e-08	1.18119e-06	41.1138	1.55832e-08	1.02006e-07	YLR032W
0.684799	-0.304085	-0.380713	8.86737	-3.93756	-4.92981	3.33714e-08	4.58225e-07	0.000874724	0.00256665	9.14043e-05	0.00030674	40.8252	1.65113e-08	1.07608e-07	YKL072W
0.973231	-0.011712	-0.961519	7.73882	-0.0931301	-7.64569	2.62135e-07	2.50263e-06	0.926769	0.440839	3.13071e-07	3.29687e-06	40.7965	1.66067e-08	1.07978e-07	YKL043W
-0.6449	0.0471863	0.597713	-7.9642	0.582728	7.38146	1.7139e-07	1.77254e-06	0.566886	0.329211	5.21421e-07	4.96689e-06	40.7619	1.6723e-08	1.08346e-07	YHL030W
-1.16123	0.644877	0.516354	-8.85728	4.9188	3.93849	3.39679e-08	4.64181e-07	9.36943e-05	0.000452788	0.000872862	0.00188106	40.7286	1.68353e-08	1.0843e-07	YCL040W
-0.247886	0.979039	-0.731152	-2.16134	8.53633	-6.37498	0.0435592	0.0449524	6.00556e-08	1.46914e-06	3.96749e-06	2.49219e-05	40.7366	1.68084e-08	1.0843e-07	YDR034W-B
-1.02546	0.696499	0.328959	-8.68923	5.90179	2.78744	4.57029e-08	6.01795e-07	1.07878e-05	8.40149e-05	0.0116934	0.0154321	40.7101	1.68985e-08	1.08793e-07	YGR008C
0.886633	-0.234566	-0.652067	8.55032	-2.26205	-6.28827	5.85661e-08	7.35454e-07	0.0355305	0.0444161	4.75543e-06	2.92287e-05	40.5941	1.72987e-08	1.11081e-07	YNL006W
0.375133	-0.85589	0.480757	3.86974	-8.82905	4.95931	0.00102172	0.00217289	3.56954e-08	9.42773e-07	8.55446e-05	0.000291815	40.5094	1.75973e-08	1.12717e-07	YPR167C
-0.377784	-0.231412	0.609198	-5.4357	-3.32965	8.76538	2.96791e-05	0.000117405	0.00349888	0.00743367	3.99354e-08	6.52399e-07	40.49	1.76667e-08	1.13067e-07	YHR149C
-0.774291	0.633045	0.141245	-8.29989	6.78583	1.51406	9.21553e-08	1.04471e-06	1.70457e-06	2.03901e-05	0.146367	0.112641	40.4082	1.79619e-08	1.14689e-07	YHR008C
0.458472	0.119587	-0.57806	6.6337	1.73032	-8.36403	2.32452e-06	1.44271e-05	0.0996815	0.0968985	8.19903e-08	1.20111e-06	40.3148	1.83059e-08	1.16303e-07	YLR038C
-0.452363	0.517872	-0.0655093	-7.06797	8.09153	-1.02355	9.66818e-07	7.15974e-06	1.35213e-07	2.63911e-06	0.318822	0.200725	40.1492	1.89336e-08	1.19811e-07	YNL117W
-0.236419	0.855264	-0.618846	-2.35807	8.53048	-6.17243	0.0291675	0.0328199	6.06894e-08	1.46914e-06	6.06668e-06	3.52705e-05	40.1326	1.89978e-08	1.20139e-07	YBR299W
-0.42016	8e-06	0.420153	-7.62433	0.00014517	7.6242	3.26135e-07	2.99144e-06	0.999886	0.460838	3.26218e-07	3.39565e-06	40.0742	1.9226e-08	1.21096e-07	YLR430W
-0.623816	0.326361	0.297456	-8.79623	4.60191	4.19433	3.78187e-08	5.11075e-07	0.000191749	0.000785397	0.000485821	0.00116182	40.0344	1.93827e-08	1.22049e-07	YOR321W
-0.235493	-0.278105	0.513597	-4.02848	-4.75742	8.78589	0.000710249	0.00163336	0.000134806	0.0005977	3.85152e-08	6.36914e-07	40.0033	1.95063e-08	1.22369e-07	YPL157W
-0.260977	-0.43658	0.697558	-3.25383	-5.44323	8.69707	0.00415193	0.00686365	2.91921e-05	0.00017977	4.50709e-08	7.20664e-07	39.935	1.97811e-08	1.23939e-07	YPL212C
-0.868074	0.062206	0.805868	-7.87207	0.564111	7.30796	2.03734e-07	2.03183e-06	0.579236	0.333233	6.01924e-07	5.55092e-06	39.8794	2.00078e-08	1.24565e-07	YER072W
0.091719	0.544184	-0.635903	1.17169	6.95183	-8.12351	0.255716	0.172122	1.21942e-06	1.5696e-05	1.27439e-07	1.63838e-06	39.8788	2.00103e-08	1.24565e-07	YJL103C
-0.602539	0.314891	0.287648	-8.77471	4.58572	4.18898	3.92825e-08	5.28801e-07	0.00019893	0.000806864	0.000491803	0.00117413	39.8374	2.01814e-08	1.25497e-07	YHR028C
1.37033	-0.021058	-1.34927	7.65771	-0.117677	-7.54004	3.05956e-07	2.84523e-06	0.907551	0.436413	3.83474e-07	3.88855e-06	39.8148	2.02749e-08	1.25804e-07	YCR102W-A
-0.207776	-0.212296	0.420071	-4.33825	-4.43262	8.77084	0.000349601	0.000899304	0.000281864	0.00106203	3.95519e-08	6.5128e-07	39.7768	2.04343e-08	1.2611e-07	YLR398C
-0.460783	-0.171128	0.63191	-6.181	-2.29553	8.47652	5.95802e-06	3.11203e-05	0.0331792	0.0421642	6.68806e-08	1.00078e-06	39.7524	2.05367e-08	1.26415e-07	YDR353W
-0.143788	-0.302844	0.446631	-2.7642	-5.82193	8.5861	0.0123003	0.0165031	1.28071e-05	9.58578e-05	5.49287e-08	8.53026e-07	39.7288	2.0637e-08	1.26718e-07	YPL177C
0.0724007	-0.529704	0.457304	1.10308	-8.07044	6.96737	0.283684	0.185158	1.40607e-07	2.70373e-06	1.182e-06	9.67512e-06	39.6034	2.11772e-08	1.30088e-07	YAL035W
0.0727443	0.477513	-0.550256	1.06445	6.9873	-8.05172	0.300386	0.193576	1.13575e-06	1.49218e-05	1.45582e-07	1.8249e-06	39.5663	2.13399e-08	1.3038e-07	YOR230W
-0.482281	0.562801	-0.0805193	-6.92565	8.08193	-1.15627	1.28525e-06	8.95875e-06	1.37642e-07	2.68035e-06	0.261813	0.172865	39.5089	2.15944e-08	1.31892e-07	YCR083W
0.539321	-0.147385	-0.391935	8.44938	-2.30904	-6.14033	7.0239e-08	8.49273e-07	0.0322717	0.041413	6.49218e-06	3.71734e-05	39.4428	2.1892e-08	1.33397e-07	YPL011C
-0.339879	0.633203	-0.293324	-4.68272	8.72403	-4.0413	0.000159634	0.000472266	4.29665e-08	1.09706e-06	0.000689688	0.00155322	39.4226	2.19838e-08	1.3368e-07	YLR152C
-0.234369	-0.25685	0.49122	-4.15606	-4.55472	8.71079	0.000530299	0.00126852	0.000213451	0.000850002	4.3987e-08	7.07104e-07	39.2597	2.27396e-08	1.37597e-07	YMR308C
-0.399583	-0.00708133	0.406665	-7.46147	-0.132231	7.59372	4.46345e-07	3.78254e-06	0.896183	0.4339	3.45855e-07	3.56436e-06	39.0734	2.36397e-08	1.42016e-07	YBR106W
0.669274	-0.477286	-0.191987	8.44189	-6.02024	-2.42163	7.11965e-08	8.55238e-07	8.37589e-06	6.76361e-05	0.0255553	0.0290385	39.0794	2.361e-08	1.42016e-07	YGL035C
-0.820634	0.438904	0.381729	-8.68763	4.64645	4.04117	4.58333e-08	6.01795e-07	0.000173312	0.000731784	0.000689895	0.00155322	39.0871	2.3572e-08	1.42016e-07	YLR340W
-0.325102	-0.275365	0.600468	-4.69642	-3.97793	8.67436	0.000154755	0.000459299	0.000797452	0.00239358	4.6927e-08	7.41006e-07	38.9939	2.40359e-08	1.44075e-07	YGR173W
0.85418	-0.64531	-0.208869	8.32416	-6.28869	-2.03547	8.81627e-08	1.00983e-06	4.75124e-06	4.35977e-05	0.0559027	0.0537783	38.9448	2.4284e-08	1.45525e-07	YGR138C
-1.01689	0.759599	0.25729	-8.33983	6.22971	2.11012	8.56815e-08	9.93438e-07	5.37727e-06	4.77258e-05	0.048248	0.0481511	38.8869	2.45801e-08	1.46969e-07	YBR214W
1.26973	-0.681084	-0.588647	8.64705	-4.63828	-4.00878	4.92645e-08	6.35843e-07	0.000176554	0.000736418	0.000743041	0.00165255	38.7287	2.54107e-08	1.51385e-07	YLR161W
-0.710427	0.230853	0.479573	-8.4737	2.75353	5.72016	6.72214e-08	8.2129e-07	0.0125891	0.0199788	1.59549e-05	7.73153e-05	38.6426	2.58752e-08	1.5363e-07	YOL123W
-1.00153	1.27822	-0.276691	-6.43734	8.21577	-1.77844	3.485e-06	2.0098e-05	1.07509e-07	2.33912e-06	0.0912382	0.0791222	38.641	2.58842e-08	1.5363e-07	YPL171C
0.725523	-0.075144	-0.650377	7.85137	-0.813184	-7.03817	2.11837e-07	2.10402e-06	0.426123	0.274269	1.02597e-06	8.57016e-06	38.5514	2.6378e-08	1.56224e-07	YIL047C-A
-0.493166	-0.032509	0.525676	-7.22659	-0.47637	7.70298	7.0622e-07	5.55031e-06	0.639209	0.35632	2.80636e-07	3.05123e-06	38.5325	2.64833e-08	1.56444e-07	YPR074C
0.00432867	1.09739	-1.10172	0.0293985	7.45303	-7.48244	0.976851	0.422232	4.53703e-07	7.19359e-06	4.28588e-07	4.26324e-06	38.446	2.69722e-08	1.59019e-07	YBR056W-A
-0.500416	0.194899	0.305519	-8.54736	3.32897	5.21841	5.88781e-08	7.35919e-07	0.00350432	0.00743996	4.79675e-05	0.000184921	38.3894	2.72977e-08	1.60407e-07	YLR087C
-0.501312	0.619083	-0.117769	-6.56632	8.1089	-1.54257	2.66953e-06	1.61396e-05	1.30931e-07	2.617e-06	0.139325	0.10863	38.3477	2.75398e-08	1.60447e-07	YBR151W
-0.529296	0.1977	0.331595	-8.52518	3.18429	5.34088	6.12704e-08	7.62502e-07	0.00485485	0.00958148	3.65737e-05	0.000149393	38.3798	2.7353e-08	1.60447e-07	YKL129C
-0.703367	0.319273	0.384096	-8.60062	3.904	4.69664	5.35208e-08	6.83711e-07	0.000944617	0.00271355	0.000154678	0.000469264	38.3546	2.74995e-08	1.60447e-07	YLL012W
-0.245152	-0.150872	0.396023	-5.27901	-3.24882	8.52783	4.19356e-05	0.000156148	0.00419906	0.0085996	6.09789e-08	9.32354e-07	38.312	2.77491e-08	1.61236e-07	YMR001C
-0.465627	0.595495	-0.129869	-6.39185	8.1746	-1.78276	3.83053e-06	2.17428e-05	1.1597e-07	2.45931e-06	0.0905111	0.0787101	38.2125	2.83424e-08	1.63582e-07	YKL065C
-0.38866	-0.144333	0.532993	-6.0613	-2.25093	8.31223	7.67562e-06	3.85895e-05	0.0363451	0.0452515	9.01026e-08	1.26696e-06	38.2267	2.82568e-08	1.63582e-07	YPL231W
0.380019	0.021284	-0.401303	7.23505	0.405219	-7.64026	6.94554e-07	5.47923e-06	0.689815	0.372852	3.16337e-07	3.31418e-06	38.2214	2.82889e-08	1.63582e-07	YPR007C
-0.657631	0.657582	5.03333e-05	-7.44209	7.44154	0.000569598	4.63434e-07	3.90306e-06	4.63936e-07	7.23776e-06	0.999551	0.430356	38.1791	2.85444e-08	1.64357e-07	YCL035C
-0.499433	1.45173	-0.952295	-2.90728	8.45074	-5.54346	0.00899231	0.0128077	7.00663e-08	1.63596e-06	2.34355e-05	0.000104958	38.1226	2.88902e-08	1.66278e-07	YGR052W
-0.581465	0.121272	0.460192	-8.1356	1.69678	6.4388	1.24624e-07	1.34555e-06	0.105957	0.101415	3.47442e-06	2.24731e-05	38.0978	2.90436e-08	1.66469e-07	YJL117W
-0.562252	0.849935	-0.287683	-5.57837	8.43262	-2.85425	2.17148e-05	9.06458e-05	7.23999e-08	1.66384e-06	0.0101041	0.0137077	38.0457	2.93682e-08	1.67991e-07	YDL079C
-0.153474	0.451781	-0.298306	-2.86547	8.43504	-5.56957	0.00985836	0.0138206	7.20837e-08	1.66384e-06	2.21362e-05	0.000100247	38.048	2.93535e-08	1.67991e-07	YJR015W
0.463033	0.077716	-0.540747	6.78879	1.13944	-7.92821	1.69437e-06	1.1077e-05	0.268594	0.199493	1.8334e-07	2.17156e-06	38.0003	2.96542e-08	1.69317e-07	YLR326W
0.378877	0.319764	-0.698641	4.64119	3.91706	-8.55825	0.000175394	0.000508513	0.00091677	0.00265394	5.77394e-08	8.86734e-07	37.9607	2.99065e-08	1.70068e-07	YDL181W
-0.845005	0.439775	0.405229	-8.56145	4.45573	4.10571	5.74083e-08	7.24899e-07	0.000267398	0.00102236	0.000595089	0.00137631	37.9198	3.01695e-08	1.71383e-07	YJR156C
0.453966	0.212768	-0.666734	5.70116	2.67206	-8.37322	1.66255e-05	7.19181e-05	0.015016	0.022843	8.06318e-08	1.18678e-06	37.832	3.0743e-08	1.73825e-07	YML052W
-0.687307	0.880976	-0.19367	-6.3465	8.13482	-1.78833	4.21026e-06	2.3286e-05	1.24803e-07	2.57751e-06	0.0895821	0.0780479	37.7966	3.09773e-08	1.74729e-07	YGR067C
-0.945343	1.35272	-0.407376	-5.8231	8.33243	-2.50934	1.2775e-05	5.85358e-05	8.68443e-08	1.95011e-06	0.0212528	0.0250294	37.7908	3.10158e-08	1.74729e-07	YMR081C
0.542894	-0.490543	-0.0523527	7.74679	-6.99977	-0.747043	2.58197e-07	2.47286e-06	1.10777e-06	1.45925e-05	0.464126	0.262368	37.7677	3.11703e-08	1.75459e-07	YJL078C
0.901746	0.178218	-1.07996	6.64966	1.31421	-7.96386	2.24977e-06	1.40562e-05	0.204323	0.164647	1.71498e-07	2.05518e-06	37.699	3.16342e-08	1.77309e-07	YLR411W
-0.276038	-0.110285	0.386324	-5.91995	-2.36518	8.28515	1.03761e-05	4.95015e-05	0.0287409	0.0379664	9.46712e-08	1.29917e-06	37.6698	3.18334e-08	1.7803e-07	YPL242C
-1.90847	0.849327	1.05915	-8.5178	3.79067	4.72713	6.20883e-08	7.69035e-07	0.00122445	0.00332695	0.000144363	0.000445365	37.6644	3.18705e-08	1.78189e-07	YDL204W
0.19527	0.663495	-0.858764	1.84897	6.28248	-8.13144	0.0799864	0.0712027	4.8134e-06	4.38808e-05	1.25584e-07	1.63297e-06	37.575	3.24906e-08	1.81135e-07	YOR161C
-0.03584	1.07529	-1.03945	-0.249795	7.49451	-7.24471	0.80541	0.377712	4.18698e-07	6.70965e-06	6.81475e-07	6.15822e-06	37.4741	3.32067e-08	1.84623e-07	YNL097W-A
-0.476689	-0.0383743	0.515062	-7.07049	-0.569187	7.63966	9.61975e-07	7.15974e-06	0.575855	0.332114	3.16704e-07	3.31418e-06	37.4618	3.32952e-08	1.84767e-07	YHR019C
-0.802673	0.210767	0.591907	-8.20423	2.15427	6.04995	1.09814e-07	1.2073e-06	0.0441802	0.0524471	7.86289e-06	4.27564e-05	37.4177	3.36149e-08	1.86017e-07	YJL138C
-0.699594	0.281907	0.417686	-8.44803	3.40421	5.04381	7.041e-08	8.49273e-07	0.00295538	0.00648963	7.07874e-05	0.000250773	37.3645	3.40044e-08	1.87814e-07	YHR016C
0.0921203	0.520447	-0.612568	1.18366	6.68724	-7.8709	0.251057	0.169803	2.08339e-06	2.38096e-05	2.04184e-07	2.37074e-06	37.2519	3.4846e-08	1.91808e-07	YJL165C
3.23245	-0.045055	-3.1874	7.40048	-0.10315	-7.29733	5.02466e-07	4.21912e-06	0.918918	0.438421	6.14594e-07	5.65226e-06	37.2372	3.49574e-08	1.92485e-07	YCR021C
-0.701954	0.340497	0.361457	-8.47054	4.10881	4.36173	6.7606e-08	8.22587e-07	0.000590885	0.00189041	0.000331343	0.000869264	37.1091	3.59463e-08	1.96999e-07	YHL015W
-0.731808	0.139624	0.592184	-7.97063	1.52074	6.44988	1.69342e-07	1.75832e-06	0.144691	0.127799	3.39549e-06	2.22371e-05	37.0359	3.65258e-08	1.99852e-07	YMR291W
0.388433	-0.541771	0.153338	5.87747	-8.19767	2.32019	1.13654e-05	5.32649e-05	1.11147e-07	2.38692e-06	0.0315399	0.0342211	36.9274	3.7403e-08	2.0433e-07	YAR023C
0.0497727	0.599389	-0.649162	0.581524	7.00303	-7.58456	0.56768	0.300964	1.10056e-06	1.45885e-05	3.51993e-07	3.61294e-06	36.8503	3.80401e-08	2.07154e-07	YGL226W
-0.579585	-0.201842	0.781427	-6.01375	-2.0943	8.10805	8.49242e-06	4.19811e-05	0.0497859	0.0572944	1.31137e-07	1.67462e-06	36.6385	3.98536e-08	2.17037e-07	YDR523C
0.533973	-0.0790617	-0.454912	7.79512	-1.15417	-6.64095	2.35589e-07	2.3014e-06	0.262654	0.196162	2.29025e-06	1.60206e-05	36.6063	4.01385e-08	2.1765e-07	YOL059W
0.565232	0.304357	-0.869588	5.38325	2.89869	-8.28193	3.33104e-05	0.000129262	0.00916404	0.0156843	9.52302e-08	1.29969e-06	36.5284	4.08348e-08	2.20967e-07	YDR247W
-0.843334	0.189329	0.654006	-8.00848	1.79791	6.21058	1.57786e-07	1.65618e-06	0.0880013	0.0880462	5.59798e-06	3.31455e-05	36.5171	4.09362e-08	2.21029e-07	YDL083C
-0.262644	0.60369	-0.341045	-3.63935	8.3651	-4.72574	0.0017305	0.00336575	8.18312e-08	1.85159e-06	0.000144819	0.000445562	36.3837	4.21643e-08	2.2756e-07	YGR143W
1.18506	-0.776192	-0.408867	8.24736	-5.40187	-2.84549	1.01453e-07	1.12619e-06	3.19721e-05	0.000193837	0.0102999	0.0139264	36.2953	4.29995e-08	2.31373e-07	YLR156W
0.520254	-0.161487	-0.358766	8.17779	-2.53839	-5.63938	1.1529e-07	1.25236e-06	0.0199847	0.0282995	1.90126e-05	8.90576e-05	36.2354	4.35763e-08	2.33092e-07	YAR033W
-0.387908	0.312494	0.075414	-7.89556	6.36058	1.53499	1.94927e-07	1.96315e-06	4.08841e-06	3.84784e-05	0.141167	0.109732	36.246	4.34732e-08	2.33092e-07	YLR189C
0.592106	-0.291732	-0.300372	8.37088	-4.12436	-4.24651	8.09758e-08	9.56532e-07	0.000570216	0.00184388	0.000431157	0.00105808	36.2328	4.36011e-08	2.33092e-07	YMR265C
0.418838	0.47539	-0.894228	3.91503	4.44364	-8.35868	0.000921033	0.00200135	0.000274869	0.00104262	8.27922e-08	1.20654e-06	36.1729	4.41868e-08	2.35793e-07	YIL045W
-0.30238	-0.141691	0.444072	-5.57171	-2.61083	8.18256	2.20332e-05	9.1762e-05	0.017126	0.0251015	1.14282e-07	1.49817e-06	36.1293	4.46182e-08	2.37419e-07	YMR012W
0.467077	-0.429002	-0.038075	7.51972	-6.90673	-0.61299	3.98798e-07	3.51163e-06	1.3351e-06	1.68791e-05	0.547106	0.292909	36.0639	4.52743e-08	2.40119e-07	YBR002C
-0.309401	-0.170068	0.479469	-5.31454	-2.92123	8.23577	3.87653e-05	0.000147743	0.0087199	0.0150525	1.03634e-07	1.37964e-06	36.0574	4.53408e-08	2.40119e-07	YIL074C
0.138629	-0.532363	0.393734	2.09313	-8.03805	5.94491	0.0499017	0.0497195	1.49332e-07	2.78615e-06	9.83642e-06	5.17787e-05	35.9635	4.63034e-08	2.44898e-07	YGR155W
-0.324205	-0.35401	0.678216	-3.98388	-4.35013	8.33401	0.000786654	0.0017585	0.000340243	0.0012281	8.65944e-08	1.23234e-06	35.9349	4.66001e-08	2.45963e-07	YLR409C
-0.422281	0.228029	0.194252	-8.32716	4.49661	3.83055	8.76828e-08	1.00983e-06	0.000243624	0.000952518	0.00111763	0.00231796	35.9293	4.66592e-08	2.4597e-07	YOR175C
-0.265759	-0.182962	0.448721	-4.90829	-3.37912	8.2874	9.59345e-05	0.000312055	0.00312829	0.00679496	9.42829e-08	1.29917e-06	35.9143	4.68163e-08	2.45976e-07	YAR018C
-0.795169	0.315523	0.479645	-8.27187	3.28228	4.98958	9.69986e-08	1.08591e-06	0.00389398	0.00810156	7.9928e-05	0.000276732	35.8807	4.71705e-08	2.47557e-07	YPR043W
-0.764463	0.0844857	0.679976	-7.58987	0.838805	6.75105	3.4842e-07	3.13171e-06	0.411943	0.267971	1.82933e-06	1.35437e-05	35.8094	4.79316e-08	2.50175e-07	YDL082W
0.0870933	0.38139	-0.468483	1.45443	6.36909	-7.82352	0.162047	0.122841	4.01649e-06	3.80577e-05	2.2327e-07	2.5494e-06	35.81	4.79254e-08	2.50175e-07	YMR281W
0.256294	0.424591	-0.680886	3.10029	5.1361	-8.2364	0.00585965	0.00904558	5.76054e-05	0.000314713	1.03512e-07	1.37964e-06	35.7898	4.81429e-08	2.50687e-07	YJL166W
0.0129263	0.690711	-0.703639	0.133549	7.13612	-7.26968	0.895155	0.401953	8.4442e-07	1.16555e-05	6.48846e-07	5.915e-06	35.7763	4.82903e-08	2.50687e-07	YPL119C
0.377121	0.306299	-0.683419	4.58175	3.72132	-8.30305	0.000200733	0.000569199	0.00143497	0.00374472	9.16251e-08	1.28165e-06	35.7732	4.83238e-08	2.50687e-07	YPR061C
0.297889	1.08426	-1.38215	1.70248	6.19672	-7.8992	0.104867	0.0877156	5.76384e-06	4.99731e-05	1.936e-07	2.27331e-06	35.7435	4.86478e-08	2.5172e-07	YNL194C
-0.695832	0.320013	0.375818	-8.30104	3.81765	4.48339	9.19621e-08	1.04471e-06	0.00115112	0.00318813	0.000251071	0.000694295	35.7047	4.9075e-08	2.53782e-07	YDR039C
0.438219	-0.031029	-0.407191	7.44385	-0.527077	-6.91678	4.61857e-07	3.90306e-06	0.604203	0.343527	1.30838e-06	1.04962e-05	35.6867	4.92736e-08	2.54288e-07	YOR319W
0.698029	-0.633896	-0.064134	7.50924	-6.8193	-0.689939	4.06951e-07	3.55965e-06	1.59278e-06	1.96178e-05	0.498522	0.275391	35.6305	4.99021e-08	2.56851e-07	YPR174C
-0.667143	0.484254	0.182887	-8.024	5.82432	2.19966	1.5329e-07	1.61588e-06	1.27413e-05	9.53461e-05	0.0403266	0.0418187	35.5541	5.07714e-08	2.60407e-07	YDR501W
-0.398688	0.530502	-0.131815	-5.98424	7.96275	-1.97852	9.04378e-06	4.43093e-05	1.71855e-07	3.11935e-06	0.0624594	0.0588467	35.549	5.08294e-08	2.60407e-07	YLR089C
-0.421974	0.387266	0.0347063	-7.4647	6.85073	0.613954	4.43558e-07	3.77702e-06	1.49469e-06	1.86128e-05	0.546482	0.292727	35.5146	5.12266e-08	2.61919e-07	YGR266W
-0.650084	0.646619	0.00346567	-7.1942	7.15585	0.038353	7.52788e-07	5.83782e-06	8.1206e-07	1.14232e-05	0.969804	0.422267	35.4915	5.14953e-08	2.62914e-07	YBR056W
0.53084	-0.086678	-0.444163	7.719	-1.26039	-6.45862	2.72203e-07	2.58931e-06	0.222693	0.174681	3.33453e-06	2.18811e-05	35.4643	5.18133e-08	2.63905e-07	YEL044W
-0.0248473	-0.452962	0.477809	-0.382045	-6.9646	7.34664	0.706641	0.348321	1.18858e-06	1.53757e-05	5.58065e-07	5.24846e-06	35.3745	5.28797e-08	2.68959e-07	YNL102W
0.420754	0.126467	-0.547221	6.07254	1.82524	-7.89779	7.49456e-06	3.78386e-05	0.0836281	0.0845701	1.94113e-07	2.27331e-06	35.3599	5.30556e-08	2.69426e-07	YPL095C
-0.541968	0.549358	-0.00739	-7.10768	7.2046	-0.0969167	8.93415e-07	6.70047e-06	7.37499e-07	1.06671e-05	0.923801	0.411658	35.309	5.36725e-08	2.71916e-07	YKL038W
-0.765802	0.304453	0.461348	-8.20373	3.26148	4.94224	1.09914e-07	1.2073e-06	0.00408094	0.00841787	8.8887e-05	0.000301226	35.2847	5.39706e-08	2.72881e-07	YIL148W
0.525249	-0.251031	-0.274218	8.2434	-3.93975	-4.30365	1.02193e-07	1.13282e-06	0.000870327	0.00255704	0.000378351	0.000957744	35.158	5.55515e-08	2.79831e-07	YHR207C
0.483895	-0.677606	0.193712	5.71692	-8.00549	2.28858	1.60675e-05	6.98601e-05	1.5867e-07	2.95478e-06	0.033655	0.0360569	35.1621	5.54996e-08	2.79831e-07	YHR211W
0.595962	-0.371559	-0.224403	8.15878	-5.08668	-3.07209	1.19402e-07	1.28591e-06	6.43198e-05	0.000340805	0.00624018	0.00922688	35.117	5.60741e-08	2.81778e-07	YDR300C
-0.752805	0.322668	0.430138	-8.2116	3.51966	4.69195	1.08336e-07	1.19472e-06	0.00227343	0.00530972	0.000156332	0.000473261	35.1015	5.6273e-08	2.82214e-07	YGR027C
-0.372895	0.832598	-0.459702	-3.68053	8.21786	-4.53732	0.00157517	0.0031202	1.07097e-07	2.33912e-06	0.000222066	0.000632112	35.0443	5.70139e-08	2.85149e-07	YOR100C
-0.145002	-0.405684	0.550686	-2.08324	-5.82843	7.91167	0.0508878	0.0505042	1.2629e-05	9.48318e-05	1.8912e-07	2.23333e-06	34.7817	6.05573e-08	3.02551e-07	YDR075W
0.548586	-0.423237	-0.125347	7.82357	-6.03593	-1.78762	2.23251e-07	2.20537e-06	8.10092e-06	6.59063e-05	0.0896995	0.0780767	34.758	6.08891e-08	3.0344e-07	YJL218W
-0.813339	0.717088	0.096251	-7.5002	6.61262	0.887578	4.14115e-07	3.59838e-06	2.4272e-06	2.65058e-05	0.385797	0.230123	34.7344	6.12217e-08	3.04326e-07	YOR152C
-0.458964	0.120018	0.338946	-7.89681	2.06499	5.83181	1.94472e-07	1.96013e-06	0.0527535	0.0600439	1.25375e-05	6.30006e-05	34.6882	6.18766e-08	3.07194e-07	YFL004W
0.641841	-0.0509807	-0.590859	7.36289	-0.584826	-6.77805	5.40642e-07	4.46643e-06	0.565503	0.328763	1.73169e-06	1.3009e-05	34.6408	6.25582e-08	3.1005e-07	YER045C
-0.371881	-0.120829	0.492709	-5.92432	-1.9249	7.8492	1.02794e-05	4.9277e-05	0.0692513	0.073617	2.12707e-07	2.46514e-06	34.612	6.29756e-08	3.11412e-07	YOR335C
-0.370729	-0.20716	0.577888	-5.17661	-2.89265	8.06924	5.26378e-05	0.000187773	0.00928668	0.0158049	1.40921e-07	1.77821e-06	34.5653	6.36596e-08	3.14249e-07	YFL022C
-0.501798	0.144971	0.356826	-7.94141	2.29429	5.64709	1.7886e-07	1.84182e-06	0.0332635	0.0422368	1.86962e-05	8.79446e-05	34.5454	6.39544e-08	3.15105e-07	YLL040C
0.257833	-0.434536	0.176703	4.82054	-8.12424	3.3037	0.000116898	0.000362615	1.27267e-07	2.58336e-06	0.0037102	0.00602445	34.5233	6.42825e-08	3.15958e-07	YOL139C
0.172746	0.369349	-0.542096	2.54731	5.44643	-7.99374	0.0196098	0.0240188	2.89881e-05	0.000179641	1.62185e-07	1.98952e-06	34.4878	6.48141e-08	3.17788e-07	YNL100W
0.647693	-0.207644	-0.440049	7.98549	-2.56007	-5.42542	1.64703e-07	1.72311e-06	0.0190853	0.027333	3.03578e-05	0.000128952	34.3861	6.63632e-08	3.24995e-07	YOR327C
-0.190314	0.456999	-0.266684	-3.37969	8.1156	-4.73591	0.00312424	0.00541085	1.29317e-07	2.60644e-06	0.000141525	0.000438345	34.3712	6.65929e-08	3.25334e-07	YJL059W
-0.867664	0.189901	0.677762	-7.75218	1.69667	6.05549	2.55569e-07	2.47061e-06	0.105978	0.101415	7.7709e-06	4.24309e-05	34.347	6.69688e-08	3.26648e-07	YBR189W
-0.507188	1.00283	-0.495644	-4.11601	8.13832	-4.02233	0.000581224	0.00137274	1.23997e-07	2.57453e-06	0.000720326	0.00161034	34.2467	6.85525e-08	3.33795e-07	YOR031W
-0.338578	-0.172988	0.511565	-5.28959	-2.70259	7.99217	4.09649e-05	0.000153407	0.0140585	0.0217268	1.62663e-07	1.9931e-06	34.1797	6.96338e-08	3.38001e-07	YEL009C
-0.491996	0.0338007	0.458196	-7.2771	0.499945	6.77716	6.39467e-07	5.16877e-06	0.622819	0.350711	1.73484e-06	1.3009e-05	34.1719	6.97606e-08	3.38313e-07	YMR032W
-0.593529	-0.0355403	0.629068	-6.82177	-0.408486	7.23025	1.58483e-06	1.05537e-05	0.687456	0.372232	7.01154e-07	6.31876e-06	34.1181	7.06438e-08	3.41526e-07	YPL240C
0.513146	-0.281989	-0.231159	8.10768	-4.4554	-3.65229	1.31228e-07	1.39937e-06	0.0002676	0.00102236	0.00168013	0.0031948	34.099	7.09616e-08	3.42795e-07	YHR054C
-0.277805	0.521956	-0.24415	-4.31082	8.09941	-3.78858	0.000372204	0.000945284	1.33252e-07	2.617e-06	0.00123032	0.00249106	33.9655	7.32181e-08	3.52533e-07	YCR061W
0.720886	-0.0790877	-0.641798	7.38866	-0.810603	-6.57806	5.14154e-07	4.28141e-06	0.427569	0.274795	2.60582e-06	1.76699e-05	33.9597	7.33178e-08	3.52533e-07	YJL077C
-0.161204	-0.551071	0.712276	-1.74856	-5.9774	7.72596	0.0964045	0.0820844	9.17691e-06	7.27282e-05	2.68624e-07	2.94366e-06	33.9449	7.35739e-08	3.53294e-07	YCL037C
0.0434843	-0.444069	0.400586	0.718955	-7.34208	6.62315	0.480864	0.269154	5.63056e-07	8.60371e-06	2.37533e-06	1.64862e-05	33.8801	7.47038e-08	3.57198e-07	YIL022W
-0.413619	-0.280304	0.693922	-4.796	-3.25018	8.04616	0.000123555	0.000380416	0.00418619	0.00858492	1.47095e-07	1.82927e-06	33.8859	7.46021e-08	3.57198e-07	YOL034W
-0.628074	-0.0163287	0.644403	-6.91658	-0.179817	7.09641	1.30889e-06	9.07513e-06	0.859188	0.423397	9.1365e-07	7.74242e-06	33.8598	7.5061e-08	3.58423e-07	YJL177W
-0.514995	0.276035	0.23896	-8.062	4.3212	3.74081	1.4283e-07	1.51598e-06	0.00036348	0.00129807	0.00137241	0.00272576	33.6639	7.86138e-08	3.74409e-07	YOR086C
-0.381485	0.697951	-0.316467	-4.40343	8.05635	-3.65293	0.000301267	0.000796946	1.44336e-07	2.70948e-06	0.00167767	0.00319444	33.6559	7.87637e-08	3.74646e-07	YOL023W
-0.402683	1.05621	-0.65353	-3.04438	7.98521	-4.94083	0.00663761	0.00997153	1.64791e-07	3.02889e-06	8.91676e-05	0.000301854	33.5886	8.00301e-08	3.79627e-07	YIL101C
-0.110863	-0.334248	0.445112	-1.92794	-5.81265	7.74059	0.0688491	0.0635314	1.30656e-05	9.73778e-05	2.61256e-07	2.87852e-06	33.5806	8.01806e-08	3.79852e-07	YGL148W
0.603635	-0.0189183	-0.584717	7.08277	-0.221979	-6.86079	9.38756e-07	7.00805e-06	0.826684	0.415001	1.46463e-06	1.14056e-05	33.534	8.10721e-08	3.83386e-07	YLR332W
0.0775003	0.524025	-0.601526	0.95338	6.44636	-7.39975	0.352296	0.218332	3.42037e-06	3.36472e-05	5.03179e-07	4.8116e-06	33.5118	8.15023e-08	3.84547e-07	YML120C
-0.160684	-0.400988	0.561671	-2.23466	-5.5766	7.81124	0.0375677	0.0398871	2.17993e-05	0.000146169	2.28513e-07	2.59688e-06	33.4727	8.22616e-08	3.87588e-07	YIL094C
-0.0586557	-0.425892	0.484548	-0.891359	-6.47206	7.36341	0.383817	0.23146	3.24297e-06	3.21919e-05	5.40092e-07	5.12282e-06	33.4019	8.36612e-08	3.93437e-07	YBR121C
-0.676234	-0.0684127	0.744647	-6.59983	-0.667685	7.26752	2.4918e-06	1.51827e-05	0.512314	0.309582	6.51609e-07	5.915e-06	33.3737	8.42241e-08	3.943e-07	YER142C
-0.527181	-0.201237	0.728418	-5.62983	-2.14904	7.77886	1.94116e-05	8.30208e-05	0.0446455	0.0528329	2.42954e-07	2.72271e-06	33.375	8.41981e-08	3.943e-07	YPL081W
-0.785382	0.267021	0.518361	-7.89057	2.68271	5.20787	1.96768e-07	1.97617e-06	0.0146752	0.0224721	4.9104e-05	0.000187617	33.2908	8.59066e-08	4.01506e-07	YDL061C
-0.51266	0.387175	0.125485	-7.69481	5.81134	1.88348	2.85042e-07	2.67665e-06	1.31026e-05	9.73778e-05	0.0749371	0.0672674	33.2734	8.62656e-08	4.0262e-07	YPL006W
-0.23785	-0.197525	0.435376	-4.36391	-3.62405	7.98798	0.000329702	0.000857575	0.001792	0.00444023	1.63941e-07	1.99664e-06	33.0859	9.02284e-08	4.20028e-07	YOR264W
0.413482	0.335416	-0.748898	4.40753	3.57537	-7.9829	0.000298464	0.000791776	0.00200246	0.00483698	1.65503e-07	2.01228e-06	33.069	9.0595e-08	4.21104e-07	YOL014W
-0.776989	0.16651	0.61048	-7.59224	1.62703	5.96522	3.46839e-07	3.13171e-06	0.120099	0.110841	9.41859e-06	4.98913e-05	33.0473	9.10696e-08	4.22639e-07	YML073C
-0.438318	0.166612	0.271704	-7.89954	3.00275	4.89676	1.93478e-07	1.95709e-06	0.00728089	0.0130784	9.84548e-05	0.000327056	32.8833	9.47384e-08	4.38046e-07	YGR255C
-0.20552	-0.249438	0.454957	-3.59566	-4.36403	7.95968	0.00191193	0.0036451	0.000329608	0.00119698	1.72844e-07	2.07036e-06	32.8601	9.52703e-08	4.38046e-07	YKL101W
-0.295682	0.73288	-0.437197	-3.19689	7.92384	-4.72694	0.00471936	0.00759344	1.8485e-07	3.31337e-06	0.000144425	0.000445365	32.8674	9.51029e-08	4.38046e-07	YLR350W
-0.0771623	0.462753	-0.385591	-1.24086	7.44158	-6.20073	0.229669	0.159184	4.63899e-07	7.23776e-06	5.71539e-06	3.3654e-05	32.8724	9.49881e-08	4.38046e-07	YNL156C
0.275923	0.216216	-0.49214	4.45895	3.49409	-7.95306	0.000265443	0.000719174	0.00240966	0.00555249	1.75001e-07	2.08543e-06	32.8642	9.5176e-08	4.38046e-07	YOL105C
-0.41131	0.772222	-0.360911	-4.24119	7.96271	-3.72151	0.000436429	0.00107712	1.71867e-07	3.11935e-06	0.00143433	0.00282877	32.8297	9.59708e-08	4.40451e-07	YKL187C
0.677325	-0.608682	-0.068642	7.23575	-6.50245	-0.733291	6.93602e-07	5.47923e-06	3.04537e-06	3.07095e-05	0.472277	0.265515	32.8068	9.65043e-08	4.41931e-07	YDR528W
-0.398453	0.356254	0.0422003	-7.24542	6.47807	0.767365	6.80533e-07	5.39927e-06	3.20287e-06	3.18997e-05	0.452237	0.257511	32.7636	9.75182e-08	4.45691e-07	YOL003C
-0.207254	0.439656	-0.232402	-3.74941	7.95378	-4.20437	0.00134567	0.00274904	1.74765e-07	3.15475e-06	0.000474786	0.0011393	32.7454	9.795e-08	4.467e-07	YGL160W
-0.538977	0.491129	0.0478493	-7.18529	6.54741	0.637895	7.66154e-07	5.91359e-06	2.77552e-06	2.88596e-05	0.531108	0.287463	32.7131	9.87179e-08	4.49527e-07	YDR452W
1.01985	-0.058567	-0.96128	7.06302	-0.40561	-6.65742	9.76392e-07	7.18835e-06	0.689532	0.37282	2.21433e-06	1.56952e-05	32.5298	1.03214e-07	4.68255e-07	YOL109W
-0.610068	0.593289	0.0167787	-6.95891	6.76751	0.19139	1.20223e-06	8.50251e-06	1.76916e-06	2.08967e-05	0.850238	0.391865	32.4919	1.0417e-07	4.71082e-07	YDR391C
-0.232103	0.63695	-0.404847	-2.85393	7.8319	-4.97797	0.0101111	0.0140858	2.19765e-07	3.78467e-06	8.2037e-05	0.000283308	32.4925	1.04157e-07	4.71082e-07	YOR292C
0.322688	0.898655	-1.22134	2.02043	5.62669	-7.64711	0.0575717	0.0555232	1.95446e-05	0.000133421	3.12219e-07	3.29687e-06	32.4774	1.04539e-07	4.73889e-07	YJR115W
-0.656799	0.225471	0.431327	-7.796	2.67627	5.11972	2.35196e-07	2.3014e-06	0.0148805	0.0226711	5.97483e-05	0.000220049	32.4538	1.05144e-07	4.73889e-07	YLR167W
-0.57136	0.697887	-0.126528	-6.0836	7.43081	-1.34722	7.32074e-06	3.71811e-05	4.73692e-07	7.35564e-06	0.19366	0.139291	32.4161	1.06115e-07	4.77537e-07	YNR001C
-0.692171	0.345475	0.346695	-7.91613	3.95108	3.96504	1.87542e-07	1.91332e-06	0.00084803	0.00250808	0.000821352	0.00178787	32.4008	1.06513e-07	4.80305e-07	YGL156W
0.594236	-0.080897	-0.51334	7.29456	-0.993053	-6.30152	6.17934e-07	5.02797e-06	0.333086	0.231747	4.62528e-06	2.86179e-05	32.3691	1.0734e-07	4.80305e-07	YNL211C
1.32787	-0.229552	-1.09832	7.39801	-1.27891	-6.1191	5.0488e-07	4.23163e-06	0.216233	0.1714	6.79028e-06	3.85774e-05	32.336	1.08215e-07	4.83922e-07	YHR053C
-0.234432	-0.454866	0.689299	-2.64227	-5.12676	7.76905	0.0160096	0.020376	5.8817e-05	0.00031953	2.47515e-07	2.7677e-06	32.2718	1.09929e-07	4.91998e-07	YOR342C
-0.557855	0.0319403	0.525914	-7.0299	0.402502	6.62739	1.04303e-06	7.56024e-06	0.691779	0.37323	2.35476e-06	1.63185e-05	32.2306	1.11046e-07	4.93811e-07	YDL076C
-0.444764	0.503641	-0.058876	-6.37755	7.22179	-0.844233	3.94627e-06	2.21101e-05	7.12926e-07	1.05221e-05	0.408978	0.240023	32.2431	1.10705e-07	4.93811e-07	YDR512C
-0.255566	0.633382	-0.377816	-3.16618	7.84689	-4.68072	0.00505613	0.00804023	2.13634e-07	3.74567e-06	0.000160359	0.000483371	32.2318	1.11011e-07	4.93811e-07	YML132W
-0.337251	-0.310321	0.647574	-4.10635	-3.77845	7.88481	0.000594227	0.00139521	0.00125919	0.00339184	1.98911e-07	2.32223e-06	32.1634	1.12894e-07	5.01813e-07	YOR063W
0.795959	-0.500288	-0.295673	7.79544	-4.8997	-2.89575	2.35447e-07	2.3014e-06	9.78053e-05	0.000467828	0.00922352	0.0127468	32.1125	1.14316e-07	5.04455e-07	YIL100W
0.080365	0.719802	-0.800167	0.718821	6.43823	-7.15705	0.480945	0.269154	3.47855e-06	3.41129e-05	8.10134e-07	7.07453e-06	32.1227	1.14029e-07	5.04455e-07	YLR349W
-0.534544	0.529336	0.00520933	-6.85701	6.79021	0.0668242	1.47584e-06	1.00537e-05	1.6895e-06	2.03512e-05	0.947415	0.416672	32.1017	1.14619e-07	5.07978e-07	YMR297W
-0.465799	0.679856	-0.214056	-5.27499	7.6991	-2.4241	4.23109e-05	0.000157429	2.82717e-07	4.73323e-06	0.025424	0.028901	32.0493	1.16109e-07	5.10584e-07	YDR018C
-0.75875	0.655604	0.103145	-7.25747	6.27088	0.98659	6.64589e-07	5.31043e-06	4.93194e-06	4.46608e-05	0.336165	0.209162	32.0459	1.16205e-07	5.10584e-07	YPL061W
-0.401374	0.689729	-0.288356	-4.55697	7.83079	-3.27383	0.000212363	0.000596095	2.20224e-07	3.78467e-06	0.00396896	0.00638564	31.9897	1.17827e-07	5.18472e-07	YKL142W
-0.894067	0.196363	0.697705	-7.47164	1.64099	5.83065	4.37642e-07	3.74877e-06	0.117147	0.108859	1.25688e-05	6.32778e-05	31.8896	1.2078e-07	5.29784e-07	YER074W
-0.544221	0.364124	0.180097	-7.70669	5.15633	2.55034	2.78662e-07	2.638e-06	5.50671e-05	0.000304362	0.019484	0.0233074	31.8794	1.21087e-07	5.29784e-07	YLR450W
0.361665	0.251247	-0.612911	4.60057	3.19599	-7.79655	0.000192332	0.000547597	0.00472888	0.00940321	2.3495e-07	2.65422e-06	31.7694	1.24435e-07	5.41967e-07	YML087C
-0.846738	0.330922	0.515817	-7.77629	3.03912	4.73716	2.44144e-07	2.36295e-06	0.00671566	0.0122904	0.000141123	0.000437582	31.7631	1.2463e-07	5.44427e-07	YER117W
-0.435424	0.475031	-0.039606	-6.47357	7.0624	-0.588833	3.23287e-06	1.89915e-05	9.77589e-07	1.33226e-05	0.562866	0.2989	31.7575	1.24803e-07	5.44427e-07	YML034W
0.0924253	0.323495	-0.41592	1.6549	5.79228	-7.44717	0.114267	0.0939491	1.36522e-05	0.000101089	4.58897e-07	4.49779e-06	31.6258	1.28958e-07	5.60869e-07	YLR001C
-0.158079	-0.478707	0.636786	-1.86258	-5.64042	7.503	0.0779598	0.0697983	1.89695e-05	0.000130594	4.11886e-07	4.12344e-06	31.5669	1.30868e-07	5.67583e-07	YEL040W
-0.272603	-0.522297	0.7949	-2.63619	-5.05082	7.68701	0.0162202	0.0206066	6.96862e-05	0.000358691	2.89312e-07	3.10217e-06	31.5572	1.31185e-07	5.67583e-07	YKR075C
0.110894	0.349799	-0.460694	1.7973	5.66933	-7.46665	0.0881011	0.076766	1.78143e-05	0.000123759	4.41885e-07	4.34635e-06	31.4097	1.36115e-07	5.88224e-07	YJR019C
0.371026	0.146316	-0.517344	5.41857	2.13685	-7.55543	3.08183e-05	0.000120899	0.0457469	0.053693	3.7227e-07	3.79055e-06	31.3715	1.37426e-07	5.91522e-07	YMR272C
-0.704201	0.094781	0.609419	-7.17343	0.965499	6.20793	7.84315e-07	6.02806e-06	0.346349	0.23844	5.62938e-06	3.31939e-05	31.3429	1.38416e-07	5.94809e-07	YER131W
0.468362	0.132192	-0.600555	5.77236	1.62921	-7.40158	1.42519e-05	6.39329e-05	0.119633	0.110479	5.01388e-07	4.80882e-06	31.284	1.40479e-07	6.01348e-07	YGR230W
-0.774293	0.127377	0.646915	-7.25647	1.19374	6.06272	6.65907e-07	5.31043e-06	0.24718	0.188248	7.65254e-06	4.20204e-05	31.3116	1.39509e-07	6.01348e-07	YLR325C
-0.597619	0.431867	0.165752	-7.52358	5.43688	2.0867	3.95841e-07	3.49622e-06	2.96022e-05	0.00018149	0.0505409	0.0498557	31.2014	1.43431e-07	6.12123e-07	YBR139W
0.0127647	0.470518	-0.483282	0.180066	6.63741	-6.81747	0.858995	0.391867	2.3069e-06	2.56618e-05	1.59869e-06	1.22609e-05	31.2177	1.42842e-07	6.12123e-07	YLL023C
-0.180772	0.598286	-0.417514	-2.28733	7.57017	-5.28285	0.0337415	0.0366591	3.61863e-07	5.89088e-06	4.15813e-05	0.000165642	31.1772	1.44311e-07	6.15347e-07	YGR183C
-0.39771	-0.012392	0.410101	-6.61724	-0.206182	6.82341	2.40431e-06	1.47302e-05	0.838828	0.4181	1.5796e-06	1.22074e-05	31.157	1.45048e-07	6.17502e-07	YGL202W
-0.246985	-0.403364	0.65035	-2.92051	-4.76963	7.69015	0.00873377	0.0125461	0.000131136	0.0005842	2.87582e-07	3.10217e-06	31.1666	1.44695e-07	6.17502e-07	YLR222C
0.109468	-0.366484	0.257015	2.25728	-7.55705	5.29975	0.0358784	0.0385025	3.71118e-07	6.00488e-06	4.00546e-05	0.000160877	31.1233	1.46286e-07	6.20699e-07	YDR194C
-0.528311	0.018851	0.509461	-6.83587	0.243915	6.59197	1.54027e-06	1.03359e-05	0.809895	0.40944	2.53233e-06	1.7312e-05	31.1065	1.46909e-07	6.23886e-07	YBL015W
-0.457061	-0.0674257	0.524488	-6.20732	-0.915705	7.12304	5.63661e-06	2.99524e-05	0.371227	0.250036	8.66601e-07	7.47946e-06	31.0597	1.48657e-07	6.30227e-07	YBR084W
-0.489141	-0.179629	0.668771	-5.47583	-2.01091	7.48675	2.71763e-05	0.000108907	0.0586505	0.0651067	4.25025e-07	4.23846e-06	31.0503	1.49008e-07	6.30227e-07	YOR242C
-0.188443	-0.285773	0.474215	-3.05734	-4.63644	7.69377	0.00644876	0.00976756	0.000177293	0.000737219	2.85605e-07	3.09358e-06	31.0359	1.49554e-07	6.33381e-07	YDR213W
-0.47572	0.453057	0.022662	-6.86395	6.53696	0.32698	1.45533e-06	9.96625e-06	2.83596e-06	2.92805e-05	0.747236	0.361654	31.0064	1.50674e-07	6.3545e-07	YMR189W
-0.773248	0.27512	0.498128	-7.638	2.71758	4.92042	3.17708e-07	2.93729e-06	0.0136097	0.0212403	9.3353e-05	0.000312334	31.0003	1.50906e-07	6.3545e-07	YPR132W
-0.444245	0.261976	0.18227	-7.69061	4.53524	3.15538	2.87332e-07	2.68642e-06	0.000223123	0.000883499	0.00518	0.00790447	30.9091	1.54438e-07	6.46982e-07	YIL125W
0.9109	-0.318591	-0.592308	7.60951	-2.66146	-4.94804	3.35533e-07	3.05317e-06	0.0153627	0.0232178	8.77356e-05	0.000297518	30.8405	1.57157e-07	6.56265e-07	YBR101C
-0.428588	-0.0736943	0.502282	-6.10242	-1.04929	7.15171	7.03452e-06	3.58891e-05	0.307127	0.219676	8.18739e-07	7.13099e-06	30.8461	1.56932e-07	6.56265e-07	YBR263W
-0.405522	-0.007702	0.413223	-6.62537	-0.125834	6.75119	2.36455e-06	1.45165e-05	0.901177	0.435477	1.82883e-06	1.35437e-05	30.847	1.56899e-07	6.56265e-07	YPR069C
0.391918	0.052551	-0.444467	6.2293	0.835268	-7.06455	5.38183e-06	2.87352e-05	0.413883	0.268942	9.73422e-07	8.14408e-06	30.8193	1.58006e-07	6.59339e-07	YPL069C
-0.823859	0.233876	0.589984	-7.47745	2.12269	5.35477	4.32743e-07	3.72878e-06	0.0470566	0.0549278	3.54694e-05	0.000145537	30.7097	1.62484e-07	6.74901e-07	YDR025W
-0.414094	-0.309714	0.723809	-4.38989	-3.28334	7.67325	0.000310716	0.000818845	0.00388468	0.0080878	2.97008e-07	3.17454e-06	30.654	1.64811e-07	6.86251e-07	YER165W
-0.274727	-0.469781	0.744508	-2.80712	-4.80015	7.60727	0.0112018	0.0153155	0.000122402	0.000558616	3.36981e-07	3.48441e-06	30.6063	1.66835e-07	6.93412e-07	YLR265C
-0.497846	0.344489	0.153357	-7.50329	5.19197	2.31133	4.11655e-07	3.59215e-06	5.087e-05	0.000285385	0.0321204	0.0347304	30.5395	1.69715e-07	7.00035e-07	YDR032C
-1.25916	0.186181	1.07298	-7.11849	1.05254	6.06595	8.74461e-07	6.59058e-06	0.305671	0.218946	7.60026e-06	4.18274e-05	30.5321	1.7004e-07	7.00035e-07	YFR015C
-0.546913	-0.0208763	0.567789	-6.52659	-0.249128	6.77571	2.89725e-06	1.73426e-05	0.805918	0.40839	1.73993e-06	1.30493e-05	30.5294	1.70155e-07	7.00035e-07	YGR141W
-0.216846	-0.348416	0.565262	-2.92324	-4.6969	7.62014	0.00868134	0.0124855	0.000154588	0.000669135	3.28768e-07	3.41425e-06	30.5653	1.686e-07	7.00035e-07	YLR129W
-0.002555	0.53706	-0.534505	-0.0317411	6.67197	-6.64022	0.975008	0.421747	2.14942e-06	2.43333e-05	2.29366e-06	1.60206e-05	30.5432	1.69556e-07	7.00035e-07	YMR104C
-0.471457	0.0568317	0.414625	-7.03094	0.847544	6.1834	1.04088e-06	7.56024e-06	0.407177	0.265732	5.92794e-06	3.4672e-05	30.4667	1.72917e-07	7.11213e-07	YOR125C
-0.0291017	-0.738527	0.767628	-0.256453	-6.50812	6.76457	0.80034	0.376335	3.0099e-06	3.06105e-05	1.77975e-06	1.33138e-05	30.3957	1.76105e-07	7.22354e-07	YOR226C
0.555039	-0.224114	-0.330924	7.6155	-3.075	-4.5405	3.31702e-07	3.03654e-06	0.0061999	0.0115573	0.000220468	0.000629474	30.3567	1.77885e-07	7.29361e-07	YLR307W
-0.870287	0.506598	0.363688	-7.60442	4.42657	3.17784	3.38826e-07	3.07046e-06	0.000285781	0.00107544	0.00492556	0.0075945	30.1681	1.86769e-07	7.6498e-07	YDR155C
-0.490999	0.356874	0.134124	-7.38529	5.36787	2.01741	5.17547e-07	4.30192e-06	3.44594e-05	0.000206899	0.0579116	0.055303	30.1357	1.88343e-07	7.6781e-07	YDR100W
-0.628692	0.124763	0.503931	-7.20753	1.43032	5.77723	7.33253e-07	5.73038e-06	0.168765	0.142797	1.4103e-05	6.96908e-05	30.1164	1.89286e-07	7.69372e-07	YBR038W
-0.009872	-0.471267	0.481138	-0.137033	-6.54166	6.67868	0.892437	0.401488	2.80861e-06	2.90708e-05	2.12013e-06	1.52096e-05	30.1324	1.88505e-07	7.69372e-07	YHR048W
1.01071	0.66389	-1.6746	4.56292	2.99719	-7.5601	0.000209511	0.000588722	0.00737139	0.0132094	3.68939e-07	3.77366e-06	29.9744	1.96404e-07	7.93975e-07	YBR054W
0.049719	0.383577	-0.433296	0.798273	6.1586	-6.95686	0.434516	0.252407	6.2464e-06	5.33027e-05	1.20717e-06	9.80674e-06	29.9761	1.96317e-07	7.93975e-07	YDL197C
0.600465	-0.0275367	-0.572928	6.74488	-0.309313	-6.43557	1.85243e-06	1.19301e-05	0.760429	0.395593	3.49781e-06	2.24731e-05	29.9906	1.95575e-07	7.93975e-07	YNL087W
0.545522	-0.392695	-0.152826	7.37254	-5.30713	-2.06539	5.30565e-07	4.39684e-06	3.94059e-05	0.000231218	0.0527115	0.0514376	29.9149	1.99476e-07	8.04819e-07	YAR028W
-0.315485	-0.062885	0.37837	-5.91754	-1.17953	7.09707	1.04298e-05	4.95015e-05	0.252656	0.190729	9.1245e-07	7.74242e-06	29.9118	1.99635e-07	8.06246e-07	YDL140C
-0.328796	0.614083	-0.285287	-4.06912	7.59979	-3.53067	0.000647109	0.00150765	3.41851e-07	5.62625e-06	0.00221717	0.00398176	29.9129	1.99578e-07	8.06246e-07	YGL006W
-0.190504	0.596949	-0.406444	-2.37532	7.44312	-5.0678	0.0281425	0.0319897	4.62507e-07	7.23776e-06	6.70914e-05	0.000241007	29.8938	2.00573e-07	8.08968e-07	YAL060W
0.489446	-0.181727	-0.307719	7.51654	-2.79083	-4.72572	4.01251e-07	3.51817e-06	0.0116072	0.018858	0.000144826	0.000445562	29.8576	2.02482e-07	8.11682e-07	YIL108W
-0.41237	0.40175	0.01062	-6.66156	6.49	0.171559	2.19563e-06	1.38055e-05	3.12476e-06	3.13096e-05	0.865587	0.396148	29.8253	2.04197e-07	8.17082e-07	YDR006C
0.4984	-0.328407	-0.169994	7.47137	-4.92306	-2.54833	4.37871e-07	3.74877e-06	9.28015e-05	0.000449883	0.0195676	0.0233876	29.8342	2.03723e-07	8.17082e-07	YPL016W
-0.265326	-0.093321	0.358647	-5.40976	-1.90273	7.3125	3.14219e-05	0.000122226	0.0722449	0.0758354	5.966e-07	5.54116e-06	29.7676	2.07306e-07	8.27767e-07	YOL004W
0.491592	-0.0892943	-0.402298	7.11938	-1.29319	-5.82619	8.72911e-07	6.59058e-06	0.211354	0.16839	1.26901e-05	6.34401e-05	29.7482	2.08357e-07	8.30433e-07	YMR164C
-0.587547	-0.0537073	0.641254	-6.26062	-0.572279	6.83289	5.03923e-06	2.7231e-05	0.573801	0.3315	1.54956e-06	1.20086e-05	29.7168	2.1008e-07	8.37077e-07	YDL126C
-0.164513	-0.34428	0.508793	-2.40097	-5.02456	7.42553	0.0266808	0.0306337	7.39041e-05	0.000377082	4.78575e-07	4.64522e-06	29.6955	2.11259e-07	8.39719e-07	YDR507C
-0.3804	0.158153	0.222247	-7.54208	3.13566	4.40642	3.81972e-07	3.41572e-06	0.00541401	0.0104081	0.000299221	0.000802205	29.6894	2.11596e-07	8.42353e-07	YLR153C
-0.660731	0.419268	0.241463	-7.48548	4.74992	2.73555	4.26075e-07	3.67983e-06	0.00013711	0.00060613	0.01309	0.016957	29.6707	2.1264e-07	8.43636e-07	YAL056W
-0.187987	-0.342754	0.530743	-2.64584	-4.82411	7.46997	0.0158874	0.0202297	0.000115959	0.000537075	4.39055e-07	4.34635e-06	29.6692	2.12724e-07	8.43636e-07	YGR162W
-0.116096	-0.354516	0.470612	-1.79267	-5.47418	7.26684	0.0888621	0.0773567	2.72747e-05	0.000171941	6.52469e-07	5.915e-06	29.6396	2.14381e-07	8.46251e-07	YML082W
-0.326186	0.369831	-0.043644	-6.1063	6.92335	-0.817029	6.97691e-06	3.57788e-05	1.2912e-06	1.63176e-05	0.423976	0.246182	29.6051	2.16335e-07	8.52806e-07	YPR155C
0.586904	-0.0238963	-0.563008	6.68376	-0.272135	-6.41163	2.09825e-06	1.32672e-05	0.788435	0.403195	3.67615e-06	2.35214e-05	29.5942	2.16956e-07	8.54047e-07	YDL129W
-0.767631	0.417501	0.350131	-7.5558	4.10946	3.44634	3.72008e-07	3.33696e-06	0.000589999	0.00189041	0.00268588	0.00464266	29.594	2.16967e-07	8.54047e-07	YMR090W
-0.712791	0.618437	0.0943553	-6.95122	6.03107	0.920164	1.22091e-06	8.57906e-06	8.1851e-06	6.6459e-05	0.368951	0.222856	29.4854	2.23268e-07	8.74897e-07	YER053C
-0.423905	0.191017	0.232887	-7.53885	3.39711	4.14173	3.84352e-07	3.42266e-06	0.00300334	0.00658054	0.000547973	0.00128317	29.4815	2.23498e-07	8.74897e-07	YIL137C
-0.730276	0.222256	0.508021	-7.35913	2.23972	5.11943	5.44623e-07	4.47306e-06	0.0371838	0.0459537	5.97871e-05	0.000220129	29.4309	2.26508e-07	8.8919e-07	YNL162W
-0.516521	-0.0524077	0.568929	-6.18855	-0.627907	6.81646	5.86395e-06	3.06554e-05	0.537493	0.318563	1.60197e-06	1.22609e-05	29.3532	2.31209e-07	9.03438e-07	YDL154W
1.01742	-0.539968	-0.47745	7.52743	-3.99499	-3.53245	3.92908e-07	3.48071e-06	0.000766879	0.00232499	0.00220822	0.00397569	29.3339	2.32397e-07	9.04509e-07	YDL037C
-0.258399	0.476896	-0.218498	-4.07689	7.52421	-3.44734	0.000635699	0.00148511	3.95359e-07	6.35915e-06	0.00267978	0.00464068	29.3403	2.32004e-07	9.04509e-07	YML057W
-0.341577	0.0328363	0.30874	-6.82529	0.656126	6.16915	1.57358e-06	1.0512e-05	0.519562	0.311523	6.10885e-06	3.54298e-05	29.3246	2.32969e-07	9.06989e-07	YDL145C
-0.366819	0.028364	0.338456	-6.75926	0.522654	6.23661	1.79908e-06	1.16885e-05	0.607219	0.344721	5.29983e-06	3.17137e-05	29.2497	2.3765e-07	9.25007e-07	YNL073W
-0.538817	-0.159354	0.698171	-5.53703	-1.63756	7.17458	2.37674e-05	9.70992e-05	0.117866	0.109332	7.82526e-07	6.90303e-06	29.2355	2.38545e-07	9.27446e-07	YDR277C
-0.770349	0.631416	0.138934	-7.05118	5.77949	1.27169	9.99702e-07	7.32655e-06	1.40343e-05	0.0001023	0.218734	0.152266	29.2093	2.40215e-07	9.29879e-07	YIL155C
0.470799	-0.164099	-0.306699	7.39548	-2.57773	-4.81774	5.0738e-07	4.23571e-06	0.0183808	0.026591	0.000117638	0.000377239	29.1436	2.44449e-07	9.43909e-07	YGL051W
-0.114187	0.566916	-0.452729	-1.42762	7.08784	-5.66022	0.169532	0.127137	9.29339e-07	1.27707e-05	1.81705e-05	8.63148e-05	29.0627	2.49782e-07	9.6562e-07	YLR168C
-0.593029	0.172621	0.420409	-7.26938	2.11599	5.15339	6.49224e-07	5.21949e-06	0.0476879	0.0554952	5.54286e-05	0.000206637	28.9128	2.60004e-07	1.00269e-06	YGL062W
-0.745864	0.568489	0.177376	-7.15371	5.45247	1.70124	8.15516e-07	6.23982e-06	2.86058e-05	0.000178264	0.105105	0.0881308	28.8854	2.61926e-07	1.00884e-06	YPL004C
-0.58579	0.556623	0.0291663	-6.62541	6.29552	0.329877	2.36434e-06	1.45165e-05	4.6837e-06	4.30866e-05	0.745079	0.361155	28.83	2.6585e-07	1.02266e-06	YBR026C
-0.412267	0.108918	0.303351	-7.1675	1.89359	5.27393	7.93567e-07	6.08822e-06	0.0735119	0.0768172	4.24108e-05	0.000168185	28.5317	2.88143e-07	1.10554e-06	YPL085W
0.457905	0.0333987	-0.491305	6.19207	0.451637	-6.64372	5.82057e-06	3.05031e-05	0.656612	0.362574	2.27731e-06	1.60206e-05	28.5012	2.90533e-07	1.11534e-06	YNR034W
0.431065	0.0618167	-0.492882	5.95489	0.853957	-6.80884	9.62886e-06	4.67104e-05	0.403701	0.264355	1.62687e-06	1.24569e-05	28.4549	2.9421e-07	1.1251e-06	YDR319C
-0.772629	0.301888	0.47074	-7.35929	2.87548	4.48379	5.44458e-07	4.47306e-06	0.00964386	0.0162335	0.000250839	0.000694295	28.4486	2.94715e-07	1.1272e-06	YGL030W
-0.724772	0.033413	0.691358	-6.55954	0.302404	6.25713	2.70703e-06	1.63109e-05	0.765609	0.396711	5.07629e-06	3.07903e-05	28.3585	3.02025e-07	1.15218e-06	YHL033C
0.068844	0.360319	-0.429164	1.10571	5.78712	-6.89285	0.282571	0.18469	1.38051e-05	0.000101578	1.37294e-06	1.08533e-05	28.3426	3.03332e-07	1.15423e-06	YGR260W
-0.309776	-0.0648043	0.374579	-5.72221	-1.19707	6.91926	1.58843e-05	6.92068e-05	0.24591	0.187851	1.30187e-06	1.04459e-05	28.2834	3.08272e-07	1.17148e-06	YGL224C
-0.362742	0.52061	-0.157869	-5.02241	7.2082	-2.1858	7.42604e-05	0.000251143	7.32286e-07	1.06671e-05	0.0414695	0.0427099	28.2516	3.10964e-07	1.18109e-06	YDR272W
-0.887587	0.145895	0.741692	-6.88939	1.13243	5.75696	1.38255e-06	9.48959e-06	0.271457	0.201036	1.4734e-05	7.17734e-05	28.2268	3.13075e-07	1.18687e-06	YIL069C
-0.778626	0.928933	-0.150306	-5.76356	6.87616	-1.1126	1.45254e-05	6.46206e-05	1.4199e-06	1.78123e-05	0.279676	0.181524	28.1749	3.17552e-07	1.204e-06	YER054C
-0.847299	-0.093697	0.940996	-6.0303	-0.66685	6.69716	8.19844e-06	4.07632e-05	0.512836	0.309711	2.04162e-06	1.47107e-05	28.1484	3.19868e-07	1.20974e-06	YBL043W
0.0238713	-0.429432	0.40556	0.364803	-6.56259	6.19778	0.719263	0.352051	2.69006e-06	2.85153e-05	5.751e-06	3.36896e-05	28.1319	3.21321e-07	1.20984e-06	YDR046C
0.611746	0.272548	-0.884294	4.98216	2.21968	-7.20184	8.12688e-05	0.000271201	0.038727	0.0475097	7.41534e-07	6.62464e-06	28.1326	3.21254e-07	1.20984e-06	YLR237W
-0.095803	-0.404935	0.500737	-1.32911	-5.61781	6.94691	0.199455	0.143354	1.99263e-05	0.000134932	1.23152e-06	9.9117e-06	28.1225	3.22151e-07	1.21178e-06	YDR488C
-0.483937	0.10949	0.374448	-7.01901	1.58803	5.43098	1.06598e-06	7.73812e-06	0.128678	0.117107	2.99889e-05	0.00012764	28.0183	3.31495e-07	1.24377e-06	YPL037C
0.380675	-0.443077	0.0624013	5.82763	-6.78293	0.955283	1.26508e-05	5.83646e-05	1.71462e-06	2.04286e-05	0.351358	0.215195	27.8798	3.44392e-07	1.29067e-06	YML008C
0.297644	0.236042	-0.533685	4.07618	3.23256	-7.30873	0.000636728	0.00148542	0.00435566	0.00883617	6.01021e-07	5.55092e-06	27.742	3.5778e-07	1.34118e-06	YPL149W
-0.696529	0.0767277	0.619803	-6.67711	0.735532	5.94159	2.12693e-06	1.34264e-05	0.470943	0.292768	9.90645e-06	5.19969e-05	27.7231	3.5966e-07	1.34665e-06	YDR216W
-0.391941	0.330915	0.061027	-6.80085	5.74195	1.05892	1.65342e-06	1.09171e-05	1.52201e-05	0.00010818	0.30283	0.192553	27.694	3.62577e-07	1.34976e-06	YBR235W
-0.421948	0.0632803	0.358667	-6.78615	1.01773	5.7684	1.70348e-06	1.11165e-05	0.321512	0.226733	1.43742e-05	7.09243e-05	27.7006	3.61914e-07	1.34976e-06	YDL185W
0.423601	0.396704	-0.820306	3.77841	3.53849	-7.3169	0.00125931	0.00260109	0.00217801	0.00514675	5.91476e-07	5.52191e-06	27.6911	3.62873e-07	1.34976e-06	YGR023W
-0.933429	1.5058	-0.572372	-4.49425	7.25009	-2.75584	0.000244938	0.000672077	6.74307e-07	1.00451e-05	0.0125258	0.0163618	27.6988	3.62097e-07	1.34976e-06	YLR205C
-0.756018	0.228371	0.527646	-7.12792	2.15314	4.97477	8.58253e-07	6.52533e-06	0.0442809	0.0525046	8.2627e-05	0.000284333	27.6419	3.67868e-07	1.36428e-06	YNL178W
-0.604069	0.477924	0.126146	-6.93071	5.4834	1.44732	1.27225e-06	8.84179e-06	2.67285e-05	0.000169224	0.164005	0.122605	27.6438	3.67672e-07	1.36428e-06	YOR176W
-0.234969	-0.107844	0.342814	-4.89942	-2.2487	7.14813	9.78659e-05	0.000317126	0.0365108	0.0454014	8.24568e-07	7.16106e-06	27.6298	3.69099e-07	1.36596e-06	YNL262W
-0.447831	0.019892	0.42794	-6.46167	0.287018	6.17466	3.31354e-06	1.93399e-05	0.777186	0.400025	6.03813e-06	3.51689e-05	27.5627	3.76063e-07	1.38981e-06	YGL137W
-0.11183	0.436262	-0.324432	-1.80125	7.0269	-5.22564	0.0874562	0.0763228	1.04931e-06	1.40492e-05	4.72033e-05	0.000182339	27.5514	3.77253e-07	1.39144e-06	YOR392W
-0.050001	-0.376129	0.426129	-0.782496	-5.88628	6.66875	0.443507	0.255643	1.11527e-05	8.62353e-05	2.16358e-06	1.54572e-05	27.4837	3.84443e-07	1.41309e-06	YMR093W
0.322465	-0.596662	0.274197	3.93661	-7.28397	3.34736	0.000876611	0.00192273	6.30895e-07	9.45098e-06	0.00336151	0.00558732	27.4924	3.83512e-07	1.41309e-06	YMR181C
-0.474441	0.228559	0.245882	-7.28836	3.51111	3.77723	6.25496e-07	5.07018e-06	0.0023181	0.00539731	0.00126269	0.00254196	27.4778	3.85083e-07	1.41468e-06	YJL172W
-0.417898	0.178556	0.239342	-7.25399	3.09942	4.15458	6.69151e-07	5.3192e-06	0.00587094	0.0111092	0.000532097	0.00125646	27.3991	3.93649e-07	1.44561e-06	YOR124C
0.0582987	-0.467231	0.408932	0.832302	-6.67044	5.83813	0.415514	0.244044	2.15614e-06	2.43549e-05	1.23683e-05	6.26088e-05	27.3246	4.01959e-07	1.46205e-06	YBL035C
-0.62533	0.390736	0.234593	-7.19488	4.49571	2.69916	7.5178e-07	5.83782e-06	0.000244127	0.000952815	0.0141629	0.0180722	27.3218	4.02271e-07	1.46205e-06	YBR196C
-0.293492	0.477373	-0.183882	-4.43241	7.20945	-2.77704	0.000281998	0.000754978	7.30474e-07	1.06671e-05	0.0119612	0.0157339	27.3464	3.99506e-07	1.46205e-06	YDL019C
-0.337783	-0.122376	0.46016	-5.15135	-1.8663	7.01766	5.56821e-05	0.000196335	0.0774151	0.0798701	1.06886e-06	8.87672e-06	27.3231	4.02125e-07	1.46205e-06	YDL164C
-0.459141	0.525334	-0.0661943	-5.8336	6.67461	-0.841029	1.24894e-05	5.77298e-05	2.13784e-06	2.43115e-05	0.410727	0.240663	27.3306	4.01283e-07	1.46205e-06	YNR041C
0.673418	-0.02842	-0.644998	6.42943	-0.271339	-6.1581	3.54264e-06	2.0344e-05	0.789038	0.403356	6.253e-06	3.59451e-05	27.346	3.99548e-07	1.46205e-06	YPL156C
0.0923963	-1.00784	0.915441	0.602555	-6.57254	5.96998	0.553885	0.296628	2.63557e-06	2.81837e-05	9.32341e-06	4.95483e-05	27.3007	4.04661e-07	1.46867e-06	YIL169C
-0.88948	0.461096	0.428385	-7.26485	3.76601	3.49884	6.55032e-07	5.25265e-06	0.00129553	0.00345458	0.00238375	0.00422427	27.301	4.04629e-07	1.46867e-06	YNL332W
0.172103	0.353898	-0.526002	2.32931	4.7898	-7.11913	0.0309527	0.0344311	0.000125295	0.00056808	8.73347e-07	7.50819e-06	27.2483	4.10663e-07	1.48826e-06	YML075C
0.271748	0.185896	-0.457642	4.28345	2.9302	-7.21363	0.000396232	0.00099835	0.00854904	0.014817	7.24483e-07	6.48452e-06	27.2209	4.13839e-07	1.49695e-06	YPR042C
0.0544907	-0.396816	0.342324	0.917653	-6.6826	5.76492	0.370232	0.225896	2.10322e-06	2.39474e-05	1.44827e-05	7.10436e-05	27.1393	4.23477e-07	1.52728e-06	YER180C
-0.409888	0.161495	0.248394	-7.18458	2.83071	4.35388	7.67228e-07	5.91359e-06	0.0106387	0.0176308	0.000337338	0.000878436	27.0889	4.29544e-07	1.5503e-06	YIL009C-A
-0.607566	0.0912027	0.516363	-6.70457	1.00643	5.69813	2.01098e-06	1.28143e-05	0.326775	0.229115	1.6735e-05	8.00105e-05	27.0356	4.36062e-07	1.56966e-06	YJL132W
-0.869263	0.470495	0.398769	-7.21572	3.90556	3.31016	7.21507e-07	5.6602e-06	0.00094123	0.00270837	0.00365642	0.00596468	26.982	4.42739e-07	1.59256e-06	YFL058W
-0.514263	0.508413	0.00585	-6.28884	6.2173	0.0715386	4.74977e-06	2.59649e-05	5.51946e-06	4.84494e-05	0.943712	0.415408	26.9586	4.45687e-07	1.60104e-06	YNL037C
0.608312	-0.158058	-0.450256	6.95594	-1.80736	-5.14859	1.20941e-06	8.53017e-06	0.0864674	0.0868	5.60245e-05	0.000208322	26.9414	4.4786e-07	1.6036e-06	YGR049W
-0.708134	0.568683	0.139451	-6.81295	5.4713	1.34166	1.61339e-06	1.0703e-05	2.74478e-05	0.00017221	0.195424	0.140133	26.9386	4.4822e-07	1.6036e-06	YLR304C
-0.122693	-0.261986	0.38468	-2.25245	-4.80965	7.06212	0.036233	0.0387789	0.000119804	0.000548971	9.78138e-07	8.16164e-06	26.9139	4.51369e-07	1.61202e-06	YDL209C
-0.740947	0.135127	0.60582	-6.77296	1.23519	5.53777	1.74969e-06	1.13902e-05	0.231724	0.179937	2.37287e-05	0.000105798	26.909	4.52002e-07	1.61328e-06	YHL001W
1.07713	-0.351054	-0.726072	7.06442	-2.30241	-4.762	9.73675e-07	7.18835e-06	0.0327139	0.0417492	0.000133416	0.000416902	26.8464	4.60128e-07	1.63948e-06	YBR201C-A
-1.11465	0.872295	0.242351	-6.84557	5.35718	1.4884	1.51035e-06	1.01834e-05	3.52815e-05	0.000209197	0.152955	0.116135	26.8094	4.64995e-07	1.65493e-06	YMR250W
0.390575	0.442929	-0.833503	3.36945	3.8211	-7.19054	0.00319755	0.00550376	0.00114208	0.003166	7.58246e-07	6.74607e-06	26.7685	4.70451e-07	1.67034e-06	YIR043C
-0.643908	0.395943	0.247965	-7.13245	4.38579	2.74666	8.50584e-07	6.48972e-06	0.000313641	0.001156	0.0127782	0.0166528	26.7662	4.70764e-07	1.67151e-06	YMR122W-A
0.390933	-0.647434	0.2565	4.31253	-7.14209	2.82954	0.000370754	0.000942456	8.34497e-07	1.15704e-05	0.0106659	0.0142976	26.7532	4.72504e-07	1.67622e-06	YCL026C-B
0.336105	0.200234	-0.53634	4.45922	2.65656	-7.11579	0.000265284	0.000719174	0.0155253	0.0234018	8.79158e-07	7.53674e-06	26.7404	4.74238e-07	1.67738e-06	YML101C
0.078282	0.468872	-0.547153	0.949893	5.68941	-6.63929	0.35402	0.218836	1.70548e-05	0.000119721	2.29807e-06	1.60506e-05	26.663	4.84852e-07	1.71145e-06	YMR103C
-0.013946	0.376462	-0.362518	-0.234594	6.3327	-6.09813	0.817018	0.380723	4.33336e-06	4.03579e-05	7.09876e-06	4.00957e-05	26.6607	4.85163e-07	1.71145e-06	YMR150C
0.67069	-0.260205	-0.410484	7.11735	-2.76129	-4.35604	8.76446e-07	6.59058e-06	0.0123783	0.0197694	0.000335675	0.000875727	26.6301	4.89432e-07	1.72312e-06	YIL168W
0.0847777	-0.565207	0.480431	0.997506	-6.65031	5.65282	0.330977	0.208771	2.24678e-06	2.5275e-05	1.8465e-05	8.7296e-05	26.6024	4.93341e-07	1.73476e-06	YJL088W
0.379657	-0.475155	0.095497	5.41675	-6.77926	1.3625	3.09423e-05	0.000120953	1.72744e-06	2.05859e-05	0.188874	0.136766	26.5955	4.94316e-07	1.73583e-06	YOR204W
0.392231	0.333186	-0.725416	3.87042	3.28778	-7.1582	0.00102012	0.00217115	0.00384596	0.00802939	8.08302e-07	7.07453e-06	26.5519	5.00542e-07	1.75547e-06	YGR045C
-0.116463	0.83226	-0.715797	-0.925928	6.61679	-5.69086	0.366024	0.224061	2.40654e-06	2.64795e-05	1.70011e-05	8.13093e-05	26.5504	5.00756e-07	1.75547e-06	YNL196C
-0.604986	0.404386	0.200601	-7.02399	4.69499	2.32901	1.05543e-06	7.68566e-06	0.000155258	0.000669135	0.030972	0.0336959	26.474	5.11866e-07	1.7915e-06	YBR013C
0.0676953	-0.549778	0.482082	0.807133	-6.55501	5.74787	0.429517	0.2503	2.73237e-06	2.86368e-05	1.50263e-05	7.28587e-05	26.4237	5.19335e-07	1.81344e-06	YAR035W
-0.0749157	-0.289437	0.364354	-1.38845	-5.36428	6.75275	0.180966	0.133459	3.47335e-05	0.000207685	1.82303e-06	1.35437e-05	26.3014	5.38005e-07	1.8772e-06	YOR260W
-1.25804	0.840224	0.417814	-6.99918	4.67464	2.32454	1.10906e-06	7.96565e-06	0.000162582	0.000691326	0.0312589	0.0339555	26.2812	5.41157e-07	1.88503e-06	YML100W
-0.11865	0.521755	-0.403105	-1.54422	6.7906	-5.24638	0.138925	0.108669	1.68817e-06	2.03512e-05	4.5081e-05	0.000175918	26.2044	5.53351e-07	1.92415e-06	YPL017C
-0.376457	-0.176657	0.553113	-4.73965	-2.22414	6.96379	0.000140331	0.000423679	0.0383785	0.0471977	1.19052e-06	9.70055e-06	26.1644	5.59803e-07	1.94579e-06	YMR092C
0.0120063	0.430856	-0.442862	0.169153	6.07017	-6.23931	0.867453	0.394568	7.53244e-06	6.19381e-05	5.26981e-06	3.16014e-05	26.1296	5.6549e-07	1.96042e-06	YFL054C
-0.235819	-0.185906	0.421724	-3.96503	-3.1258	7.09082	0.00082136	0.00182168	0.00553483	0.0106065	9.23847e-07	7.80362e-06	26.1184	5.67346e-07	1.96463e-06	YOR151C
0.062152	0.563672	-0.625823	0.640205	5.80618	-6.44637	0.529637	0.28871	1.32492e-05	9.7639e-05	3.42029e-06	2.23161e-05	26.0858	5.72756e-07	1.97991e-06	YIR020C
0.727765	-0.0744513	-0.653315	6.45435	-0.660288	-5.79407	3.36417e-06	1.95099e-05	0.516945	0.311008	1.35997e-05	6.75758e-05	26.0818	5.73414e-07	1.97991e-06	YOR394W
-0.440294	0.137959	0.302334	-6.94187	2.17512	4.76673	1.24403e-06	8.6761e-06	0.0423701	0.0508599	0.000131998	0.000413851	26.0738	5.74759e-07	1.98407e-06	YLR354C
-0.484014	0.573973	-0.089959	-5.56294	6.59687	-1.03393	2.24587e-05	9.34298e-05	2.50697e-06	2.71814e-05	0.31407	0.198265	26.0364	5.81053e-07	2.002e-06	YHR097C
-0.446029	0.412429	0.0336007	-6.36553	5.88601	0.479534	4.04636e-06	2.25346e-05	1.11592e-05	8.62353e-05	0.636998	0.325838	25.9885	5.89238e-07	2.02676e-06	YMR152W
0.746178	-1.24042	0.49424	4.23238	-7.03575	2.80337	0.000445313	0.00109518	1.03094e-06	1.38431e-05	0.011294	0.0149471	25.9467	5.96486e-07	2.04802e-06	YDR534C
-0.113804	0.632151	-0.518347	-1.19576	6.64215	-5.44639	0.246408	0.167672	2.28462e-06	2.55168e-05	2.89903e-05	0.000124755	25.9251	6.00255e-07	2.05893e-06	YIL099W
-0.593885	0.31903	0.274854	-7.06815	3.79696	3.27119	9.6646e-07	7.15974e-06	0.00120696	0.0032913	0.00399264	0.00641405	25.8786	6.0848e-07	2.08065e-06	YBR046C
0.199627	-0.461231	0.261604	3.05292	-7.05366	4.00073	0.00651261	0.0098525	9.94775e-07	1.34932e-05	0.000756862	0.00167339	25.88	6.08243e-07	2.08065e-06	YGR041W
-0.569895	0.363872	0.206022	-6.97834	4.4556	2.52273	1.1563e-06	8.28199e-06	0.000267478	0.00102236	0.0206592	0.0244578	25.8226	6.18561e-07	2.11538e-06	YBR149W
0.419881	-0.180661	-0.239219	7.03423	-3.0266	-4.00763	1.03406e-06	7.52664e-06	0.00690527	0.0125383	0.000745	0.00165367	25.7495	6.31988e-07	2.15685e-06	YBR007C
-0.769135	0.369047	0.400087	-7.05418	3.38474	3.66943	9.93741e-07	7.3017e-06	0.00308868	0.00673323	0.00161563	0.00310222	25.7429	6.3322e-07	2.15731e-06	YHR021C
0.497326	-0.433728	-0.0635993	6.4807	-5.65195	-0.828769	3.18548e-06	1.87958e-05	1.84999e-05	0.000128034	0.417461	0.243225	25.7251	6.36556e-07	2.16798e-06	YGL028C
-0.368938	-0.0655513	0.43449	-5.55186	-0.98643	6.5383	2.30092e-05	9.48027e-05	0.336241	0.233616	2.82812e-06	1.89951e-05	25.6957	6.42091e-07	2.18201e-06	YJL101C
-0.305287	-0.0841473	0.389434	-5.24874	-1.44673	6.69546	4.48457e-05	0.000164115	0.16417	0.14009	2.04872e-06	1.4745e-05	25.6701	6.46949e-07	2.19601e-06	YFR050C
0.51576	-0.331215	-0.184544	6.94554	-4.46035	-2.48518	1.2349e-06	8.6277e-06	0.000264597	0.00101604	0.0223648	0.0260986	25.615	6.57562e-07	2.23031e-06	YCR035C
-0.625995	0.40175	0.224244	-6.93501	4.45074	2.48426	1.26131e-06	8.79405e-06	0.000270457	0.00103196	0.0224084	0.0261386	25.5335	6.73613e-07	2.28143e-06	YIR007W
-0.616788	-0.085666	0.702452	-5.6539	-0.785274	6.43917	1.84214e-05	7.89829e-05	0.441915	0.280616	3.4718e-06	2.24731e-05	25.5235	6.75594e-07	2.2851e-06	YLR448W
-0.760501	0.21542	0.54508	-6.81112	1.92932	4.88179	1.6194e-06	1.0744e-05	0.0686666	0.0730987	0.000101828	0.000336516	25.4888	6.82585e-07	2.30563e-06	YGR148C
-1.08623	0.643529	0.442699	-6.97961	4.13502	2.84458	1.15338e-06	8.23159e-06	0.000556463	0.00181108	0.0103205	0.0139431	25.4749	6.85415e-07	2.30926e-06	YNL237W
-0.542116	0.21091	0.331207	-6.96175	2.70847	4.2533	1.19539e-06	8.50251e-06	0.0138808	0.0215628	0.000424514	0.00104543	25.4705	6.86302e-07	2.3095e-06	YGL206C
-0.72815	0.29672	0.43143	-6.9742	2.84197	4.13222	1.16594e-06	8.33213e-06	0.0103796	0.0173311	0.000560039	0.00130491	25.4358	6.93419e-07	2.32992e-06	YJL191W
-1.40816	1.58382	-0.17566	-5.68131	6.39002	-0.708713	1.73571e-05	7.50356e-05	3.84516e-06	3.69126e-05	0.487055	0.271341	25.3738	7.06304e-07	2.37043e-06	YGR088W
-0.629301	0.621303	0.00799767	-6.10443	6.02685	0.0775801	7.00459e-06	3.58157e-05	8.25895e-06	6.68468e-05	0.938968	0.414919	25.3673	7.07676e-07	2.37394e-06	YJL164C
-0.236082	-0.340275	0.576357	-2.85265	-4.11165	6.96431	0.0101395	0.0141183	0.000587046	0.00188414	1.18929e-06	9.70055e-06	25.3507	7.11175e-07	2.37442e-06	YGL179C
-0.153411	-0.386505	0.539915	-1.9305	-4.86369	6.79418	0.0685125	0.0633252	0.000106062	0.000499692	1.67594e-06	1.27696e-05	25.3502	7.11298e-07	2.37442e-06	YMR309C
-0.467321	0.237775	0.229547	-7.00252	3.56291	3.43962	1.10169e-06	7.93458e-06	0.00206015	0.00492822	0.00272719	0.00469676	25.3561	7.10032e-07	2.37442e-06	YOR162C
-0.112645	0.54891	-0.436266	-1.35996	6.62698	-5.26703	0.189665	0.138307	2.35676e-06	2.61208e-05	4.30636e-05	0.000170242	25.338	7.13878e-07	2.38124e-06	YBR177C
-0.183045	-0.382684	0.56573	-2.21852	-4.63814	6.85666	0.0388181	0.0409602	0.000176611	0.000736418	1.47689e-06	1.15298e-05	25.3174	7.18287e-07	2.39138e-06	YCL024W
-0.3488	0.20739	0.14141	-6.95591	4.13584	2.82004	1.20949e-06	8.53017e-06	0.000555417	0.00180963	0.0108899	0.0145286	25.3154	7.18698e-07	2.39151e-06	YIL005W
0.328534	-0.108434	-0.220099	6.85933	-2.26395	-4.59535	1.46896e-06	1.00101e-05	0.0353935	0.0443419	0.000194625	0.000564281	25.264	7.2982e-07	2.42487e-06	YBR165W
-0.100496	0.492717	-0.392221	-1.34634	6.60092	-5.25458	0.193937	0.140489	2.48619e-06	2.70622e-05	4.42689e-05	0.000173761	25.1613	7.52574e-07	2.4913e-06	YDR357C
0.591932	0.0529637	-0.644896	5.76698	0.516006	-6.28299	1.44184e-05	6.42773e-05	0.611766	0.346488	4.80826e-06	2.94714e-05	25.163	7.52189e-07	2.4913e-06	YMR056C
-0.691379	1.00123	-0.309849	-4.70447	6.81284	-2.10836	0.000151959	0.000453405	1.61375e-06	1.97835e-05	0.0484168	0.048234	25.1602	7.52835e-07	2.4913e-06	YOR374W
-0.451566	0.00710233	0.444462	-6.08026	0.0956317	5.98461	7.37284e-06	3.72997e-05	0.924808	0.440463	9.0367e-06	4.83338e-05	25.092	7.68387e-07	2.5342e-06	YGL026C
-0.899442	0.180448	0.718995	-6.58423	1.32094	5.26329	2.57296e-06	1.56364e-05	0.202113	0.163303	4.3422e-05	0.000170946	25.0937	7.67997e-07	2.5342e-06	YOL039W
-0.207625	-0.16402	0.371645	-3.88092	-3.06585	6.94675	0.000995896	0.00213911	0.00632756	0.0117083	1.23191e-06	9.9117e-06	25.0658	7.74453e-07	2.54725e-06	YJL087C
-0.573702	0.615023	-0.0413217	-5.80973	6.22819	-0.418454	1.3148e-05	5.97126e-05	5.39446e-06	4.77258e-05	0.680278	0.340408	25.0659	7.74443e-07	2.54725e-06	YOR136W
0.332096	-0.474757	0.142663	4.73847	-6.77401	2.03556	0.000140708	0.000424359	1.74596e-06	2.07419e-05	0.0558926	0.0537783	24.985	7.93522e-07	2.60962e-06	YMR146C
-0.225585	-0.142215	0.367799	-4.22678	-2.66467	6.89144	0.000451059	0.00110737	0.0152567	0.0230924	1.37685e-06	1.09018e-05	24.9761	7.95645e-07	2.61275e-06	YER031C
0.434986	-0.374367	-0.0606187	6.41428	-5.52039	-0.893879	3.65593e-06	2.09476e-05	2.46482e-05	0.00015961	0.382501	0.22878	24.9619	7.99067e-07	2.61914e-06	YJR056C
-0.547024	-0.0981503	0.645175	-5.46359	-0.980311	6.44391	2.79159e-05	0.000111232	0.339175	0.235005	3.43781e-06	2.23946e-05	24.934	8.05822e-07	2.63862e-06	YKR005C
-0.299894	-0.196363	0.496257	-4.16509	-2.72719	6.89228	0.000519447	0.00124897	0.0133296	0.0209115	1.37452e-06	1.08533e-05	24.9179	8.09753e-07	2.64476e-06	YBR202W
-0.222655	0.43756	-0.214904	-3.53226	6.94155	-3.40928	0.00220916	0.00408582	1.24484e-06	1.58181e-05	0.00292154	0.00497058	24.9165	8.10073e-07	2.64476e-06	YER119C
-0.410457	0.0634013	0.347055	-6.44674	0.995797	5.45093	3.41767e-06	1.97355e-05	0.331785	0.231001	2.87028e-05	0.000123985	24.9095	8.11804e-07	2.64782e-06	YNL243W
-0.604401	0.097874	0.506526	-6.46413	1.04677	5.41734	3.2967e-06	1.93219e-05	0.308258	0.220363	3.09021e-05	0.000130483	24.8969	8.14891e-07	2.65413e-06	YLR299W
-0.402651	0.298116	0.104534	-6.68451	4.9491	1.7354	2.09503e-06	1.32672e-05	8.75274e-05	0.000429797	0.0987594	0.0838603	24.883	8.18323e-07	2.65695e-06	YER026C
-0.264864	-0.100599	0.365463	-4.86641	-1.84833	6.71474	0.000105414	0.000334118	0.0800819	0.0817989	1.96971e-06	1.42792e-05	24.8824	8.18482e-07	2.65695e-06	YLR419W
-0.177707	-0.240449	0.418155	-2.93374	-3.96953	6.90326	0.00848257	0.0122374	0.000812935	0.00243762	1.34447e-06	1.07061e-05	24.8248	8.32864e-07	2.70215e-06	YOL076W
0.085153	-0.423749	0.338595	1.31555	-6.54662	5.23105	0.203881	0.145638	2.78003e-06	2.88596e-05	4.66401e-05	0.000180517	24.802	8.38637e-07	2.71808e-06	YOR361C
-0.269105	-0.108937	0.378042	-4.78705	-1.93785	6.7249	0.000126076	0.000386049	0.0675528	0.0722531	1.92934e-06	1.40617e-05	24.7822	8.43683e-07	2.73072e-06	YJL041W
0.611228	-0.59984	-0.011387	6.0487	-5.93601	-0.112685	7.88389e-06	3.94527e-05	1.00255e-05	7.8604e-05	0.911455	0.408433	24.7616	8.48973e-07	2.74334e-06	YAR050W
-0.487222	0.142106	0.345115	-6.72008	1.96002	4.76005	1.94838e-06	1.24887e-05	0.0647318	0.0700745	0.000134008	0.000417551	24.7008	8.64796e-07	2.79142e-06	YBR011C
-0.360553	0.179064	0.181489	-6.91028	3.4319	3.47838	1.3256e-06	9.19093e-06	0.00277537	0.00616631	0.00249728	0.004395	24.6904	8.67535e-07	2.79386e-06	YCL014W
-0.500818	0.300545	0.200273	-6.86463	4.11952	2.74511	1.45334e-06	9.92219e-06	0.000576573	0.00185845	0.0128213	0.0167012	24.6904	8.67528e-07	2.79386e-06	YGL229C
-0.532442	-0.091005	0.623447	-5.45759	-0.932812	6.3904	2.8286e-05	0.000112666	0.362548	0.245902	3.84209e-06	2.43779e-05	24.6434	8.80033e-07	2.82883e-06	YLR273C
-0.696454	0.544374	0.152079	-6.56056	5.12797	1.43258	2.70134e-06	1.62858e-05	5.86587e-05	0.00031953	0.168127	0.125021	24.6077	8.89637e-07	2.85729e-06	YGL074C
0.297769	-0.347079	0.049311	5.46912	-6.37479	0.905693	2.75794e-05	0.000110193	3.9691e-06	3.79175e-05	0.37637	0.226027	24.6009	8.91503e-07	2.86002e-06	YKL027W
-0.353592	-0.04199	0.395582	-5.6096	-0.666156	6.27576	2.02855e-05	8.62131e-05	0.513269	0.309752	4.88172e-06	2.97706e-05	24.5758	8.98356e-07	2.87556e-06	YPR119W
0.0514877	0.303739	-0.355226	0.924061	5.45128	-6.37532	0.36697	0.224493	2.86805e-05	0.000178517	3.96468e-06	2.49147e-05	24.5477	9.06097e-07	2.89746e-06	YKL034W
0.426855	0.008697	-0.435553	5.9028	0.120267	-6.02308	1.07644e-05	5.08862e-05	0.905526	0.43597	8.32547e-06	4.4879e-05	24.5201	9.13774e-07	2.91929e-06	YER065C
0.260289	0.222689	-0.482976	3.706	3.17065	-6.87663	0.00148612	0.0029709	0.00500574	0.00979204	1.41857e-06	1.11551e-05	24.4995	9.19526e-07	2.93469e-06	YJL091C
0.803851	-0.386746	-0.417106	6.88095	-3.31054	-3.57042	1.40625e-06	9.67212e-06	0.00365333	0.00767514	0.0020252	0.0037226	24.4925	9.21502e-07	2.93731e-06	YPL239W
0.0820093	0.261153	-0.343162	1.57453	5.01397	-6.5885	0.131767	0.10453	7.56783e-05	0.000383666	2.55047e-06	1.74065e-05	24.4829	9.24207e-07	2.93992e-06	YOR288C
-0.200032	0.790296	-0.590264	-1.6742	6.6145	-4.94029	0.110372	0.0912567	2.41789e-06	2.64927e-05	8.92759e-05	0.000301854	24.4601	9.307e-07	2.95842e-06	YNL195C
-0.603689	0.0743863	0.529301	-6.30351	0.776716	5.52678	4.60609e-06	2.52489e-05	0.446829	0.282782	2.4306e-05	0.000108304	24.4331	9.38418e-07	2.97687e-06	YBR078W
-0.702505	0.179074	0.523432	-6.61394	1.68594	4.92801	2.42065e-06	1.48205e-05	0.108057	0.103044	9.1775e-05	0.000307349	24.4293	9.39509e-07	2.97942e-06	YHR010W
-0.205331	0.294924	-0.089593	-4.66625	6.70228	-2.03604	0.000165703	0.000487143	2.02038e-06	2.32999e-05	0.0558399	0.0537628	24.4184	9.42672e-07	2.98134e-06	YKL064W
0.67601	-0.17938	-0.496631	6.63289	-1.76004	-4.87286	2.32837e-06	1.44271e-05	0.0943904	0.0929253	0.000103896	0.000342145	24.4176	9.42897e-07	2.98134e-06	YPR065W
0.427304	-0.0227023	-0.404601	6.10233	-0.324212	-5.7781	7.03579e-06	3.58891e-05	0.749298	0.392106	1.40764e-05	6.96908e-05	24.3805	9.53706e-07	3.01229e-06	YNR019W
0.616601	0.208211	-0.824811	4.9332	1.66582	-6.59902	9.071e-05	0.000297571	0.112049	0.105547	2.49595e-06	1.72325e-05	24.3558	9.60962e-07	3.02672e-06	YGR035C
-0.595523	0.225677	0.369846	-6.79783	2.57608	4.22175	1.66358e-06	1.09573e-05	0.0184453	0.0266716	0.000456274	0.00110621	24.3598	9.59792e-07	3.02672e-06	YOR369C
-0.293579	-0.137336	0.430914	-4.5759	-2.1406	6.71648	0.000203418	0.000573906	0.045405	0.0534376	1.96271e-06	1.42434e-05	24.3468	9.63633e-07	3.03234e-06	YLR027C
0.607109	0.23095	-0.83806	4.80713	1.82868	-6.63581	0.00012049	0.000371798	0.0830912	0.0841686	2.31449e-06	1.60805e-05	24.2965	9.78642e-07	3.07564e-06	YLR004C
-0.391974	-0.0146537	0.406628	-5.82365	-0.217713	6.04137	1.27598e-05	5.85358e-05	0.829959	0.415967	8.00769e-06	4.3375e-05	24.2875	9.81358e-07	3.0773e-06	YDR144C
0.19591	0.277303	-0.473213	2.82337	3.99638	-6.81975	0.010811	0.0148976	0.000764448	0.00231996	1.59133e-06	1.2251e-05	24.2844	9.82291e-07	3.0773e-06	YEL024W
0.0699063	0.291956	-0.361864	1.24756	5.21032	-6.4579	0.227255	0.158098	4.88372e-05	0.000276674	3.33951e-06	2.18956e-05	24.2696	9.86802e-07	3.08909e-06	YGL187C
0.662351	0.030326	-0.692676	5.79496	0.265324	-6.06027	1.35736e-05	6.15904e-05	0.793599	0.404736	7.69239e-06	4.21578e-05	24.2594	9.89897e-07	3.09459e-06	YBR196C-A
-0.71983	0.158505	0.561325	-6.51425	1.43442	5.07982	2.97203e-06	1.76481e-05	0.167607	0.142257	6.53129e-05	0.000236657	24.2314	9.98485e-07	3.11569e-06	YPL249C-A
0.158096	0.294008	-0.452104	2.35801	4.38515	-6.74317	0.0291708	0.0328199	0.0003141	0.001156	1.85891e-06	1.36579e-05	24.2185	1.00248e-06	3.11802e-06	YOR245C
-0.445416	0.3096	0.135815	-6.67494	4.63962	2.03531	2.13638e-06	1.34591e-05	0.000176018	0.000736418	0.0559205	0.0537783	24.2058	1.00639e-06	3.13742e-06	YBR286W
-0.295174	0.461952	-0.166778	-4.31645	6.75531	-2.43885	0.000367448	0.000935752	1.81357e-06	2.12854e-05	0.024651	0.0282161	24.2026	1.00741e-06	3.13742e-06	YDL206W
-0.138962	-0.258432	0.397395	-2.35737	-4.38408	6.74147	0.0292094	0.0328444	0.000314864	0.0011574	1.86535e-06	1.36955e-05	24.2063	1.00625e-06	3.13742e-06	YJR064W
0.113129	0.317372	-0.430501	1.73306	4.86194	-6.59501	0.0991836	0.0840416	0.000106482	0.000500887	2.51658e-06	1.72856e-05	24.1757	1.0158e-06	3.15668e-06	YKR102W
0.477549	-0.271458	-0.206093	6.81638	-3.8747	-2.9417	1.60221e-06	1.06619e-05	0.00101017	0.00286557	0.00833473	0.0117021	24.1736	1.01646e-06	3.15668e-06	YNL103W
0.226613	0.156301	-0.382915	4.02286	2.77468	-6.79755	0.000719452	0.00164507	0.012023	0.0193353	1.66452e-06	1.26517e-05	24.1595	1.02091e-06	3.15668e-06	YPR020W
-0.224504	-0.392079	0.616582	-2.45533	-4.28804	6.74336	0.023814	0.0279686	0.000392094	0.00137899	1.85819e-06	1.36579e-05	24.0905	1.04296e-06	3.20662e-06	YER115C
-0.751706	0.280574	0.471131	-6.757	2.52205	4.23494	1.80736e-06	1.17262e-05	0.0206891	0.0290509	0.000442712	0.00107984	24.1125	1.03589e-06	3.20662e-06	YKL169C
-0.581104	0.708781	-0.127676	-5.24949	6.40287	-1.15338	4.47714e-05	0.000164115	3.74373e-06	3.60878e-05	0.26297	0.1732	24.0889	1.04349e-06	3.20662e-06	YMR173W-A
0.48476	-0.0477667	-0.436993	6.17763	-0.608723	-5.5689	6.00053e-06	3.12709e-05	0.549872	0.322745	2.21684e-05	0.000100376	23.9724	1.08191e-06	3.32173e-06	YJL134W
0.85893	-0.152202	-0.706727	6.38217	-1.13092	-5.25124	3.90854e-06	2.20627e-05	0.272076	0.201301	4.45971e-05	0.000174694	23.9863	1.07725e-06	3.32173e-06	YNL077W
-0.610322	0.336612	0.27371	-6.79477	3.74753	3.04724	1.67394e-06	1.09716e-05	0.00135148	0.00356588	0.00659543	0.00962373	23.956	1.08747e-06	3.34836e-06	YMR015C
-0.43904	0.479048	-0.040007	-5.61844	6.13043	-0.511974	1.98987e-05	8.50305e-05	6.62956e-06	5.57538e-05	0.614532	0.317698	23.9259	1.09772e-06	3.37076e-06	YCR091W
0.226793	0.346048	-0.572841	2.67303	4.07859	-6.75162	0.0149847	0.0193353	0.000633226	0.00198975	1.82722e-06	1.35437e-05	23.9097	1.10325e-06	3.37076e-06	YDR286C
0.243647	-0.487038	0.243392	3.39955	-6.79554	3.396	0.00298672	0.00522114	1.67134e-06	2.03512e-05	0.0030109	0.00509294	23.8769	1.11462e-06	3.39306e-06	YFL027C
-0.599473	1.12174	-0.522271	-3.62964	6.79185	-3.16221	0.00176929	0.00342127	1.68389e-06	2.03512e-05	0.00510138	0.00779727	23.8886	1.11055e-06	3.39306e-06	YKL163W
-0.168328	0.655213	-0.486885	-1.67889	6.53502	-4.85614	0.109443	0.0906218	2.84731e-06	2.92834e-05	0.000107883	0.000351977	23.8211	1.13421e-06	3.44996e-06	YIR016W
0.415637	-0.166956	-0.248681	6.74079	-2.70769	-4.03311	1.86794e-06	1.20038e-05	0.0139042	0.0215721	0.00070276	0.00157734	23.7965	1.14299e-06	3.47198e-06	YDR348C
0.505293	-0.166916	-0.338376	6.65863	-2.19958	-4.45904	2.20883e-06	1.38372e-05	0.0403334	0.0490079	0.000265392	0.00072746	23.8043	1.14018e-06	3.47198e-06	YOR054C
-0.321483	0.368975	-0.0474917	-5.4311	6.23342	-0.802318	2.99811e-05	0.000118257	5.33549e-06	4.75629e-05	0.432229	0.249748	23.7828	1.1479e-06	3.49816e-06	YCR030C
-0.447647	0.402271	0.0453747	-6.15702	5.53291	0.624091	6.26728e-06	3.24364e-05	2.39823e-05	0.000157695	0.539943	0.290328	23.7536	1.15843e-06	3.52428e-06	YCR011C
-0.329221	-0.0569923	0.386214	-5.34945	-0.926058	6.27553	3.58888e-05	0.000138205	0.365958	0.247432	4.88411e-06	2.97706e-05	23.7346	1.16534e-06	3.55033e-06	YHR027C
-0.557296	-0.033916	0.591211	-5.68061	-0.345711	6.0263	1.73836e-05	7.50356e-05	0.733335	0.387173	8.2685e-06	4.46413e-05	23.6825	1.18457e-06	3.57197e-06	YCL027W
-0.59195	0.361137	0.230813	-6.71697	4.09788	2.61908	1.96078e-06	1.2524e-05	0.000605853	0.00192602	0.0168262	0.0207185	23.7048	1.17629e-06	3.57197e-06	YGL208W
-0.401841	0.325176	0.0766657	-6.37043	5.15505	1.21539	4.00528e-06	2.23565e-05	5.52251e-05	0.000304362	0.239013	0.162168	23.658	1.19372e-06	3.59787e-06	YOR367W
0.197825	-0.4869	0.289074	2.73095	-6.72158	3.99062	0.0132213	0.0174955	1.94244e-06	2.255e-05	0.000774599	0.00170398	23.6334	1.20299e-06	3.61058e-06	YDR214W
0.273113	-1.20003	0.926919	1.46832	-6.45167	4.98335	0.158277	0.120522	3.3829e-06	3.33626e-05	8.10531e-05	0.000280543	23.651	1.19634e-06	3.61058e-06	YHR213W-A
0.0593493	0.411004	-0.470354	0.78348	5.42573	-6.20922	0.442943	0.255605	3.03369e-05	0.000184654	5.61411e-06	3.31455e-05	23.6486	1.19725e-06	3.61058e-06	YHR214W
-0.803997	0.262118	0.541879	-6.63121	2.16189	4.46931	2.33643e-06	1.44571e-05	0.0435106	0.0518772	0.000259252	0.00071411	23.6536	1.19536e-06	3.61058e-06	YLR061W
0.588299	-0.268988	-0.319313	6.75108	-3.08679	-3.6643	1.82923e-06	1.18284e-05	0.00603886	0.0113484	0.00163467	0.00313377	23.623	1.20694e-06	3.63628e-06	YBR203W
-0.375364	0.0381063	0.337256	-6.13337	0.62265	5.5107	6.58846e-06	3.39039e-05	0.54087	0.319841	2.51768e-05	0.000111608	23.5682	1.22793e-06	3.68305e-06	YJR045C
-0.229557	-0.2936	0.523156	-2.95559	-3.78016	6.73573	0.00808283	0.0117699	0.00125427	0.00338962	1.88726e-06	1.38061e-05	23.5756	1.22507e-06	3.68305e-06	YKR079C
-0.408299	0.293218	0.115081	-6.54598	4.70097	1.84502	2.7837e-06	1.66964e-05	0.00015317	0.000665402	0.0805818	0.0714676	23.5612	1.23068e-06	3.68305e-06	YML035C
0.511506	-0.271137	-0.24037	6.74147	-3.57349	-3.168	1.86534e-06	1.20038e-05	0.00201108	0.00484355	0.0050356	0.00772604	23.5268	1.2441e-06	3.70854e-06	YNL281W
0.386954	-0.641995	0.255042	4.03283	-6.69086	2.65804	0.000703211	0.00161957	2.06804e-06	2.37855e-05	0.015476	0.0193784	23.4727	1.26555e-06	3.79371e-06	YOL162W
-0.842719	0.266905	0.575813	-6.57501	2.08243	4.49257	2.62222e-06	1.58717e-05	0.0509695	0.0584331	0.000245875	0.000683962	23.3534	1.31431e-06	3.90383e-06	YDR382W
-0.0850007	0.375023	-0.290021	-1.453	6.41062	-4.9576	0.16244	0.12307	3.68386e-06	3.5738e-05	8.58733e-05	0.000292797	23.3653	1.30934e-06	3.90383e-06	YPR010C-A
0.137912	0.553665	-0.691577	1.26504	5.07866	-6.34369	0.22106	0.15506	6.54831e-05	0.000342272	4.23501e-06	2.63813e-05	23.3138	1.33096e-06	3.95397e-06	YDR178W
-0.410631	0.105969	0.304662	-6.46915	1.66945	4.7997	3.26255e-06	1.91277e-05	0.111319	0.105221	0.000122525	0.000388043	23.3271	1.32532e-06	3.95397e-06	YIL030C
-0.192274	-0.189697	0.38197	-3.37745	-3.33219	6.70962	0.00314013	0.00543166	0.00347886	0.00740157	1.99035e-06	1.43871e-05	23.2773	1.34648e-06	4.00865e-06	YOR001W
0.427454	0.039334	-0.466788	5.5317	0.509023	-6.04072	2.40459e-05	9.77726e-05	0.61656	0.348381	8.0188e-06	4.3375e-05	23.2151	1.37347e-06	4.04873e-06	YBL006C
-0.280166	-0.0196597	0.299827	-5.59798	-0.392818	5.99081	2.08061e-05	8.78037e-05	0.698799	0.376074	8.91792e-06	4.77831e-05	23.2262	1.36859e-06	4.04873e-06	YBL023C
-0.089876	0.498039	-0.408163	-1.13445	6.28643	-5.15198	0.27063	0.179474	4.77376e-06	4.36482e-05	5.56036e-05	0.000207108	23.2151	1.37347e-06	4.04873e-06	YLR231C
-0.4967	0.431368	0.0653317	-6.16795	5.35667	0.811279	6.12429e-06	3.1837e-05	3.53214e-05	0.000209197	0.42719	0.247508	23.2311	1.36645e-06	4.04873e-06	YOL155C
-0.951662	0.271005	0.680658	-6.50159	1.85146	4.65013	3.05082e-06	1.80469e-05	0.0796124	0.0815224	0.000171872	0.000510955	23.2058	1.37753e-06	4.06863e-06	YOL040C
-0.31343	-0.205387	0.518816	-4.01834	-2.63317	6.6515	0.000726933	0.00165406	0.0163255	0.0242231	2.2413e-06	1.57886e-05	23.2061	1.3774e-06	4.06863e-06	YPL158C
0.592103	-0.310042	-0.282062	6.69284	-3.50456	-3.18829	2.0597e-06	1.31032e-05	0.00235292	0.00545755	0.00481142	0.00746394	23.1779	1.38987e-06	4.08844e-06	YJR046W
0.482119	-0.259814	-0.222304	6.68937	-3.6049	-3.08445	2.07435e-06	1.31369e-05	0.00187207	0.00459327	0.00607052	0.00899495	23.1832	1.3875e-06	4.08844e-06	YLR461W
-0.120503	0.677506	-0.557004	-1.11548	6.2716	-5.15614	0.278468	0.182863	4.92443e-06	4.46608e-05	5.50913e-05	0.000206064	23.1509	1.40188e-06	4.11299e-06	YGR182C
-0.215451	-0.0855123	0.300963	-4.64088	-1.84197	6.48284	0.000175516	0.000508513	0.081046	0.0824344	3.17139e-06	2.09768e-05	23.0802	1.43398e-06	4.19618e-06	YLR433C
-0.624741	0.066701	0.558041	-6.08032	0.649171	5.43116	7.37186e-06	3.72997e-05	0.52395	0.313094	2.99768e-05	0.00012764	23.0566	1.44489e-06	4.22055e-06	YDR500C
0.427369	-0.0880047	-0.339365	6.32159	-1.30176	-5.01985	4.4351e-06	2.44134e-05	0.208466	0.166825	7.4688e-05	0.000262603	23.0451	1.45022e-06	4.23989e-06	YDL160C-A
-0.283979	-0.0642727	0.348252	-5.11544	-1.15777	6.27321	6.03218e-05	0.000209125	0.261217	0.195185	4.90788e-06	2.9885e-05	23.0469	1.44937e-06	4.23989e-06	YLR024C
0.423874	0.165717	-0.58959	4.64835	1.81731	-6.46565	0.000172568	0.000502051	0.0848768	0.0855749	3.2863e-06	2.16689e-05	22.9963	1.47312e-06	4.29333e-06	YOL081W
0.322828	0.254978	-0.577805	3.71702	2.9358	-6.65281	0.00144914	0.00291154	0.00844411	0.0146689	2.23531e-06	1.57886e-05	22.9896	1.47629e-06	4.31243e-06	YBR293W
-0.142829	-0.266417	0.409248	-2.29175	-4.27477	6.56653	0.0334377	0.0364563	0.000404175	0.00140669	2.66833e-06	1.7964e-05	22.9724	1.48448e-06	4.31243e-06	YDR309C
-0.413022	-0.3991	0.812122	-3.38864	-3.27442	6.66305	0.00306156	0.00533531	0.00396368	0.00821253	2.18896e-06	1.56321e-05	22.9572	1.49177e-06	4.33649e-06	YLL061W
-0.434215	0.552901	-0.118687	-4.96642	6.32391	-1.3575	8.41905e-05	0.000278881	4.41365e-06	4.09767e-05	0.190429	0.137505	22.9224	1.50857e-06	4.38446e-06	YEL060C
0.743416	-0.0350243	-0.708393	5.89945	-0.277939	-5.62152	1.08419e-05	5.08862e-05	0.784042	0.401991	1.97657e-05	9.21928e-05	22.9163	1.51153e-06	4.38446e-06	YPR154W
-0.698423	0.29928	0.399144	-6.63154	2.84167	3.78988	2.33483e-06	1.44271e-05	0.0103864	0.017333	0.00122668	0.00248728	22.8933	1.52278e-06	4.40323e-06	YDR461C-A
-0.367224	-0.058791	0.426016	-5.29188	-0.847206	6.13909	4.07584e-05	0.000153068	0.40736	0.265794	6.50924e-06	3.72121e-05	22.8914	1.52371e-06	4.40323e-06	YIR006C
-0.631856	0.517541	0.114314	-6.24094	5.11183	1.1291	5.25185e-06	2.81483e-05	6.08085e-05	0.00032803	0.272823	0.177994	22.8724	1.53308e-06	4.42705e-06	YGR295C
1.15919	-0.523862	-0.635325	6.63991	-3.00072	-3.63919	2.29512e-06	1.43365e-05	0.00731383	0.0131297	0.00173115	0.00326532	22.866	1.53624e-06	4.44566e-06	YCR018C
-0.261534	0.446764	-0.185231	-3.87269	6.6155	-2.74282	0.00101484	0.00216154	2.41289e-06	2.64795e-05	0.0128852	0.0167534	22.8485	1.54495e-06	4.44566e-06	YIL088C
0.672016	-0.126781	-0.545234	6.25292	-1.17966	-5.07326	5.12129e-06	2.76099e-05	0.252605	0.190729	6.62777e-05	0.000239356	22.8288	1.5548e-06	4.46935e-06	YPL058C
-0.171558	0.454783	-0.283225	-2.48038	6.57524	-4.09486	0.022592	0.0267693	2.62095e-06	2.817e-05	0.000610069	0.0014046	22.8031	1.56779e-06	4.51135e-06	YGR149W
-0.465272	0.464991	0.000281333	-5.75238	5.74891	0.00347826	1.48805e-05	6.60876e-05	1.49926e-05	0.000107519	0.997261	0.429921	22.7983	1.57024e-06	4.51135e-06	YLR345W
0.658025	-0.408074	-0.24995	6.57611	-4.07817	-2.49793	2.61625e-06	1.58717e-05	0.00063383	0.00198975	0.0217713	0.0255437	22.7902	1.57436e-06	4.51135e-06	YPR175W
-0.723536	0.180752	0.542784	-6.37733	1.59317	4.78416	3.94812e-06	2.21101e-05	0.127519	0.116581	0.000126902	0.000400103	22.7834	1.57783e-06	4.53485e-06	YLR344W
-0.395646	-0.249301	0.644947	-4.03622	-2.54327	6.57949	0.000697769	0.00160863	0.0197791	0.0280611	2.59817e-06	1.76621e-05	22.7669	1.58627e-06	4.5583e-06	YDR433W
-0.632394	0.205685	0.42671	-6.4995	2.11395	4.38556	3.06398e-06	1.80678e-05	0.047882	0.055558	0.000313804	0.000833772	22.7312	1.6047e-06	4.5817e-06	YJL136C
0.479454	0.137789	-0.617243	4.90536	1.40974	-6.3151	9.6568e-05	0.000313641	0.174676	0.146727	4.49577e-06	2.78757e-05	22.726	1.60741e-06	4.60504e-06	YIL111W
-0.256792	-0.169122	0.425913	-3.965	-2.61133	6.57631	0.000821426	0.00182168	0.0171078	0.025087	2.61519e-06	1.76699e-05	22.677	1.63319e-06	4.6569e-06	YDR226W
0.173755	0.262408	-0.436164	2.61972	3.95635	-6.57609	0.0168032	0.0212507	0.000837853	0.00248756	2.61639e-06	1.76699e-05	22.6675	1.63823e-06	4.67475e-06	YHR198C
0.11386	-0.496813	0.382954	1.44816	-6.31881	4.87067	0.163774	0.123681	4.46094e-06	4.13138e-05	0.000104408	0.000343027	22.6632	1.64054e-06	4.67475e-06	YPR035W
-0.540849	0.630086	-0.089237	-5.24885	6.11489	-0.866031	4.48342e-05	0.000164115	6.85111e-06	5.69673e-05	0.39721	0.234881	22.644	1.65081e-06	4.69788e-06	YML118W
-0.643934	0.352835	0.2911	-6.60634	3.61985	2.98649	2.45871e-06	1.50325e-05	0.00180927	0.00447933	0.00754828	0.0107322	22.635	1.65566e-06	4.71557e-06	YDR502C
0.421678	-0.360499	-0.0611773	6.1212	-5.23311	-0.888069	6.76023e-06	3.47147e-05	4.64273e-05	0.000264562	0.38554	0.230088	22.6271	1.65993e-06	4.71557e-06	YPL185W
-0.343648	-0.0483243	0.391972	-5.31134	-0.746889	6.05823	3.90412e-05	0.000148102	0.464217	0.290549	7.72582e-06	4.22946e-05	22.5675	1.69247e-06	4.79533e-06	YGR124W
0.209783	-0.341579	0.131796	4.02201	-6.54883	2.52683	0.000720849	0.00164691	2.76741e-06	2.88596e-05	0.0204806	0.0242929	22.56	1.69659e-06	4.81821e-06	YOR060C
0.336476	0.340113	-0.67659	3.28041	3.31587	-6.59629	0.00391041	0.00653777	0.00360959	0.00761017	2.50995e-06	1.72591e-05	22.4974	1.73159e-06	4.89767e-06	YKL148C
0.205287	-0.54237	0.337084	2.47133	-6.52926	4.05795	0.0230269	0.0271925	2.88137e-06	2.9491e-05	0.000663889	0.00150815	22.4762	1.74365e-06	4.91481e-06	YDR432W
0.318477	-0.227497	-0.09098	6.40228	-4.57333	-1.82896	3.74828e-06	2.13319e-05	0.000204612	0.000823518	0.0830483	0.0734005	22.4914	1.73502e-06	4.91481e-06	YNL267W
-0.147674	-0.271671	0.419346	-2.2884	-4.20989	6.49829	0.0336677	0.0366357	0.000468831	0.00158766	3.07166e-06	2.0363e-05	22.47	1.74717e-06	4.93746e-06	YIL140W
-0.353149	0.079293	0.273855	-6.27915	1.40987	4.86927	4.84712e-06	2.64084e-05	0.174639	0.146727	0.000104739	0.000343713	22.4485	1.75952e-06	4.96005e-06	YOR165W
-0.595166	0.0172553	0.57791	-5.78569	0.167741	5.61794	1.38477e-05	6.20943e-05	0.868548	0.426071	1.99204e-05	9.25052e-05	22.4273	1.7718e-06	4.9826e-06	YOR096W
-0.419516	-0.484804	0.904319	-3.05208	-3.52706	6.57913	0.0065248	0.00986027	0.00223544	0.00524915	2.60007e-06	1.76621e-05	22.4192	1.77648e-06	5.00509e-06	YCR098C
0.467819	-0.048876	-0.418944	5.98661	-0.625459	-5.36117	8.99817e-06	4.41907e-05	0.539064	0.319023	3.49723e-05	0.000144541	22.396	1.79006e-06	5.02188e-06	YDR367W
-0.796401	0.256553	0.539848	-6.44739	2.07696	4.37042	3.4131e-06	1.97184e-05	0.0515226	0.0589326	0.000324837	0.000852991	22.3995	1.78799e-06	5.02188e-06	YPL111W
-0.620421	0.017824	0.602596	-5.779	0.166024	5.61296	1.40492e-05	6.28931e-05	0.869881	0.426377	2.01377e-05	9.29739e-05	22.3811	1.79882e-06	5.03858e-06	YKR057W
-0.513268	0.0529453	0.460322	-5.98149	0.617011	5.36447	9.09702e-06	4.43703e-05	0.544506	0.320756	3.47185e-05	0.000143936	22.3835	1.79743e-06	5.03858e-06	YLR333C
-0.300601	0.083559	0.217041	-6.36337	1.76884	4.59449	4.06469e-06	2.25454e-05	0.0928703	0.091789	0.000195006	0.000564523	22.3125	1.83983e-06	5.14477e-06	YDR293C
-0.629136	0.0551577	0.573978	-5.92718	0.519649	5.40753	1.02167e-05	4.88821e-05	0.609272	0.345691	3.15764e-05	0.000133039	22.2823	1.85823e-06	5.19486e-06	YMR232W
-0.187789	0.377663	-0.189874	-3.26179	6.5598	-3.29801	0.0040781	0.00677362	2.7056e-06	2.86265e-05	0.00375818	0.00609533	22.2492	1.87856e-06	5.24484e-06	YPR028W
-0.506873	0.809815	-0.302941	-4.05749	6.48253	-2.42503	0.000664582	0.00154355	3.17346e-06	3.17056e-05	0.0253745	0.0288681	22.1872	1.91739e-06	5.35044e-06	YER037W
-0.127356	-0.633109	0.760466	-1.02373	-5.08913	6.11286	0.318743	0.202884	6.39693e-05	0.000340414	6.88067e-06	3.89315e-05	22.169	1.92898e-06	5.3723e-06	YOR032C
-0.307251	0.178094	0.129158	-6.51774	3.77793	2.73983	2.95069e-06	1.75666e-05	0.00126067	0.00339184	0.0129689	0.0168234	22.1504	1.94085e-06	5.3881e-06	YBL007C
-0.341915	0.518556	-0.176642	-4.24425	6.43693	-2.19269	0.000433382	0.00107332	3.48795e-06	3.41129e-05	0.0408979	0.0423331	22.1488	1.94191e-06	5.3881e-06	YNL098C
0.226361	-0.381314	0.154951	3.8624	-6.50635	2.64393	0.00103904	0.00220302	3.02094e-06	3.06105e-05	0.0159527	0.0198252	22.1437	1.94514e-06	5.40984e-06	YGL253W
-0.160485	-0.35708	0.517565	-1.98076	-4.40721	6.38798	0.0621881	0.0588724	0.000298679	0.001117	3.86154e-06	2.44497e-05	22.1135	1.96473e-06	5.43153e-06	YER069W
-0.206808	-0.153969	0.360776	-3.73351	-2.77962	6.51311	0.0013955	0.002822	0.0118943	0.0192103	2.97904e-06	1.98597e-05	22.0903	1.97987e-06	5.48086e-06	YEL007W
-0.761128	0.251495	0.509632	-6.4133	2.11911	4.29418	3.66339e-06	2.09476e-05	0.0473929	0.0552159	0.000386628	0.000974888	22.0817	1.98551e-06	5.49633e-06	YDL136W
-0.442493	0.23323	0.209262	-6.53098	3.44236	3.0886	2.87117e-06	1.72e-05	0.00271024	0.00606461	0.00601451	0.00892612	22.0755	1.98962e-06	5.49633e-06	YPL144W
-0.200867	-0.195487	0.396355	-3.30952	-3.22088	6.53041	0.00366174	0.00616251	0.00447163	0.00902278	2.87453e-06	1.92177e-05	22.0514	2.00555e-06	5.54542e-06	YBL022C
0.340095	-0.155204	-0.18489	6.51897	-2.97496	-3.544	2.94322e-06	1.75443e-05	0.00774364	0.0136891	0.00215089	0.00391017	22.0287	2.02076e-06	5.56684e-06	YDL235C
0.172933	-0.444307	0.271374	2.51677	-6.46622	3.94944	0.0209215	0.0251776	3.28243e-06	3.24821e-05	0.000851226	0.00184433	21.9725	2.05885e-06	5.6708e-06	YGR078C
-0.0257513	0.36529	-0.339538	-0.411597	5.83863	-5.42702	0.685212	0.341172	1.23548e-05	9.35605e-05	3.02512e-05	0.000128722	21.9612	2.06658e-06	5.67951e-06	YGR038W
-0.05802	-0.418618	0.476638	-0.726944	-5.24495	5.97189	0.476067	0.267173	4.52239e-05	0.0002587	9.28532e-06	4.95483e-05	21.9577	2.06898e-06	5.67951e-06	YOR359W
-0.361996	-0.108144	0.470139	-4.78968	-1.43089	6.22056	0.000125328	0.000384185	0.168603	0.1427	5.48172e-06	3.2514e-05	21.9517	2.07316e-06	5.67951e-06	YPL241C
-0.337759	0.286202	0.0515573	-6.04371	5.12117	0.922543	7.96794e-06	3.98321e-05	5.95549e-05	0.000323293	0.367741	0.222316	21.9241	2.09228e-06	5.72178e-06	YGL101W
0.247431	-0.542039	0.294608	2.96932	-6.50477	3.53546	0.00784098	0.0114955	3.03079e-06	3.06105e-05	0.00219309	0.00396129	21.9326	2.08641e-06	5.72178e-06	YJR007W
-0.222731	0.735994	-0.513264	-1.92104	6.34791	-4.42688	0.0697635	0.0641426	4.19788e-06	3.92678e-05	0.000285578	0.000772997	21.9171	2.09717e-06	5.74284e-06	YJR108W
-0.792366	0.309696	0.482671	-6.45557	2.52316	3.93242	3.35567e-06	1.95099e-05	0.0206406	0.0289963	0.00088507	0.00189864	21.8899	2.11629e-06	5.79118e-06	YDR516C
-0.423131	0.105864	0.317267	-6.24677	1.56288	4.68387	5.18794e-06	2.788e-05	0.13448	0.121106	0.000159218	0.000480507	21.855	2.14112e-06	5.83941e-06	YCR088W
0.263649	0.253779	-0.517426	3.31139	3.18742	-6.49879	0.00364634	0.00614769	0.00482081	0.00953562	3.06847e-06	2.0363e-05	21.8398	2.15202e-06	5.86028e-06	YNL193W
-0.18811	-0.231803	0.419914	-2.90311	-3.57743	6.48056	0.0090752	0.0129061	0.00199307	0.0048272	3.18639e-06	2.10596e-05	21.7931	2.1859e-06	5.95627e-06	YGR200C
-0.435546	0.467808	-0.0322623	-5.41072	5.81151	-0.40079	3.13556e-05	0.000122226	1.30979e-05	9.73778e-05	0.693018	0.344226	21.7884	2.18936e-06	5.95627e-06	YJL070C
-0.32946	-0.0283403	0.3578	-5.37468	-0.462333	5.837	3.39459e-05	0.000131409	0.649061	0.35979	1.23984e-05	6.26088e-05	21.7751	2.19915e-06	5.97695e-06	YBR229C
-0.452144	0.110387	0.341757	-6.22178	1.519	4.70279	5.46762e-06	2.91048e-05	0.145126	0.128	0.00015254	0.000463779	21.7622	2.20864e-06	5.99757e-06	YOL011W
-0.0430757	-0.305192	0.348268	-0.735205	-5.20895	5.94414	0.471138	0.26531	4.89864e-05	0.000276766	9.85254e-06	5.17787e-05	21.7182	2.2415e-06	6.06577e-06	YER025W
-0.331783	0.538417	-0.206634	-3.95892	6.42454	-2.46562	0.000832939	0.00184138	3.57881e-06	3.48793e-05	0.0233049	0.026994	21.7253	2.23616e-06	6.06577e-06	YFL062W
-0.170209	-0.341576	0.511786	-2.11397	-4.24233	6.35632	0.0478796	0.0481638	0.000435297	0.00149598	4.12489e-06	2.56915e-05	21.6708	2.27747e-06	6.16739e-06	YHL014C
0.482175	0.13974	-0.621914	4.77855	1.38488	-6.16342	0.000128521	0.000392254	0.182038	0.151684	6.18317e-06	3.56885e-05	21.6264	2.31179e-06	6.24176e-06	YOL032W
-0.321852	0.0175277	0.304324	-5.74702	0.312975	5.43404	1.50541e-05	6.65527e-05	0.757688	0.394897	2.9788e-05	0.000127368	21.597	2.33475e-06	6.28898e-06	YKR082W
-0.400949	-0.00935933	0.410309	-5.53068	-0.129102	5.65979	2.40994e-05	9.80373e-05	0.898625	0.434663	1.81873e-05	8.63148e-05	21.5913	2.33926e-06	6.30914e-06	YFL007W
0.266019	0.492757	-0.758776	2.22962	4.13001	-6.35963	0.0379542	0.0401755	0.000562883	0.00182802	4.09652e-06	2.56236e-05	21.5343	2.3847e-06	6.40312e-06	YDR034C-A
-0.267434	-0.043294	0.310728	-5.12793	-0.830143	5.95807	5.86644e-05	0.000205615	0.416703	0.270143	9.56363e-06	5.05376e-05	21.5379	2.38183e-06	6.40312e-06	YEL022W
0.390131	-0.137424	-0.252708	6.35867	-2.23985	-4.11883	4.10474e-06	2.27225e-05	0.0371735	0.0459537	0.000577473	0.00133777	21.5141	2.40105e-06	6.44997e-06	YCL050C
0.79407	-0.504049	-0.290022	6.37094	-4.04406	-2.32689	4.00103e-06	2.23452e-05	0.000685347	0.00212711	0.0311077	0.0338174	21.4946	2.41697e-06	6.49671e-06	YIR039C
-0.291171	-0.152252	0.443424	-4.1631	-2.17687	6.33999	0.000521816	0.00125359	0.0422212	0.0507621	4.26784e-06	2.65093e-05	21.4628	2.44306e-06	6.53631e-06	YDL070W
0.422439	-1.13948	0.717038	2.36291	-6.37364	4.01074	0.0288766	0.0325923	3.9786e-06	3.79175e-05	0.000739709	0.00164712	21.4721	2.4354e-06	6.53631e-06	YHR213W-B
-0.359013	0.147085	0.211927	-6.40616	2.62456	3.78159	3.71814e-06	2.12043e-05	0.0166296	0.0245532	0.00125017	0.00252037	21.4497	2.45392e-06	6.54902e-06	YER009W
-0.73024	-0.00943	0.73967	-5.5432	-0.0715825	5.61479	2.34486e-05	9.57464e-05	0.943678	0.446273	2.00578e-05	9.29739e-05	21.4602	2.44524e-06	6.54902e-06	YJL153C
-0.385499	0.162314	0.223186	-6.41057	2.69917	3.71142	3.68427e-06	2.10191e-05	0.0141628	0.0218275	0.0014678	0.00286665	21.4249	2.47471e-06	6.5954e-06	YIL129C
0.26826	0.0298703	-0.29813	5.2586	0.585536	-5.84411	4.38759e-05	0.000162305	0.565035	0.32858	1.221e-05	6.19325e-05	21.4227	2.47649e-06	6.61501e-06	YDR408C
-0.45684	0.395381	0.061458	-5.92731	5.1299	0.797391	1.02139e-05	4.88821e-05	5.84066e-05	0.000318506	0.435015	0.250699	21.4005	2.49528e-06	6.65411e-06	YLR257W
-0.114251	-0.288608	0.402859	-1.77011	-4.47143	6.24153	0.0926541	0.0799492	0.000258003	0.000998364	5.24532e-06	3.15487e-05	21.4001	2.4956e-06	6.65411e-06	YLR274W
-0.156655	-0.173908	0.330563	-3.04297	-3.37811	6.42108	0.00665842	0.00998769	0.00313546	0.00680563	3.60466e-06	2.30625e-05	21.3373	2.54942e-06	6.77995e-06	YDR172W
-0.363126	-0.174884	0.538011	-4.24846	-2.04609	6.29456	0.000429231	0.00106404	0.0547505	0.0617566	4.69317e-06	2.88619e-05	21.3221	2.56265e-06	6.79928e-06	YOL082W
-0.296533	0.366994	-0.0704597	-4.88814	6.04964	-1.16148	0.000100382	0.000322183	7.86819e-06	6.45583e-05	0.259742	0.172006	21.3165	2.56758e-06	6.81857e-06	YIL010W
0.508648	-0.298706	-0.209941	6.38053	-3.74699	-2.63352	3.92192e-06	2.20746e-05	0.00135314	0.00356714	0.0163134	0.0201932	21.2632	2.61463e-06	6.91733e-06	YHR035W
-0.170648	-0.211303	0.381951	-2.85696	-3.5376	6.39457	0.0100441	0.0139994	0.00218244	0.00514915	3.80893e-06	2.42422e-05	21.2221	2.65154e-06	7.00843e-06	YDR238C
-0.530875	0.3646	0.166274	-6.26253	4.30106	1.96147	5.01904e-06	2.71754e-05	0.000380604	0.00134803	0.0645514	0.0603728	21.2216	2.65204e-06	7.00843e-06	YNL208W
0.46188	-0.29404	-0.16784	6.32536	-4.02683	-2.29854	4.40032e-06	2.42411e-05	0.000712936	0.00219236	0.0329748	0.0355721	21.2019	2.66988e-06	7.05384e-06	YBL033C
0.383464	-0.921393	0.537929	2.65138	-6.37078	3.7194	0.0156993	0.0200603	4.00236e-06	3.79878e-05	0.00144127	0.0028332	21.1819	2.68827e-06	7.09915e-06	YAR064W
0.52041	-0.235659	-0.284752	6.3844	-2.89107	-3.49334	3.89041e-06	2.20387e-05	0.00931905	0.0158415	0.00241373	0.00426167	21.1376	2.7293e-06	7.19709e-06	YEL049W
-0.442812	0.393928	0.048883	-5.82964	5.18608	0.643547	1.25963e-05	5.80958e-05	5.15404e-05	0.000287116	0.527514	0.286124	21.128	2.73835e-06	7.21582e-06	YGR209C
-0.00178133	0.385162	-0.38338	-0.0256467	5.54536	-5.5197	0.979805	0.423218	2.33383e-05	0.000154166	2.46856e-05	0.000109913	21.102	2.7629e-06	7.26081e-06	YKR055W
-0.551559	0.573544	-0.021986	-5.42046	5.63651	-0.216068	3.0691e-05	0.000120676	1.91315e-05	0.000130982	0.831223	0.385948	21.0949	2.76959e-06	7.27176e-06	YGL205W
1.10916	-0.728885	-0.380279	6.28533	-4.1304	-2.15494	4.78474e-06	2.60779e-05	0.000562379	0.00182802	0.0441213	0.0449255	21.0987	2.76595e-06	7.27176e-06	YGR161C
-0.397242	0.061421	0.335823	-5.92937	0.916791	5.0126	1.01689e-05	4.88821e-05	0.370672	0.249759	7.59097e-05	0.000265494	21.0693	2.794e-06	7.31655e-06	YMR186W
-0.472935	0.2287	0.244235	-6.38147	3.08593	3.29555	3.91417e-06	2.20627e-05	0.00605044	0.011356	0.00377907	0.00612567	21.0634	2.79972e-06	7.32735e-06	YGR097W
-0.278651	-0.325899	0.604551	-2.93876	-3.43706	6.37583	0.00838911	0.0121401	0.00274309	0.00611264	3.96048e-06	2.49147e-05	21.0613	2.80172e-06	7.32735e-06	YKR013W
-0.392091	0.358946	0.033144	-5.75387	5.26746	0.486382	1.48329e-05	6.57482e-05	4.30223e-05	0.000247994	0.632224	0.324267	21.0575	2.80542e-06	7.34581e-06	YPR003C
-0.311214	0.0246957	0.286519	-5.73699	0.455245	5.28175	1.53841e-05	6.77683e-05	0.65406	0.361629	4.1682e-05	0.000165642	21.0325	2.82961e-06	7.39033e-06	YIL128W
0.143052	-0.472757	0.329705	1.88041	-6.21436	4.33395	0.0753754	0.0681383	5.55369e-06	4.85711e-05	0.000353045	0.000909235	21.005	2.85657e-06	7.46086e-06	YOR343C
0.376524	0.019912	-0.396435	5.37041	0.284008	-5.65441	3.42667e-05	0.000132592	0.779457	0.400441	1.84013e-05	8.697e-05	20.9901	2.87118e-06	7.47911e-06	YOR013W
0.165921	-0.345994	0.180074	3.05226	-6.36487	3.31263	0.00652206	0.00986027	4.05199e-06	3.82215e-05	0.00363613	0.00594192	20.9581	2.90308e-06	7.54151e-06	YLR396C
0.476848	-0.141807	-0.335041	6.20039	-1.8439	-4.35649	5.71943e-06	3.02011e-05	0.0807515	0.0822413	0.000335333	0.000875647	20.9658	2.89533e-06	7.54151e-06	YPR047W
-0.0609763	0.546734	-0.485758	-0.647817	5.80854	-5.16073	0.524807	0.286817	1.31819e-05	9.7639e-05	5.45307e-05	0.000204637	20.9548	2.90633e-06	7.55175e-06	YDL248W
-0.016751	-0.295873	0.312622	-0.303166	-5.35481	5.65795	0.765037	0.365808	3.54664e-05	0.000209969	1.826e-05	8.6643e-05	20.9502	2.91102e-06	7.55175e-06	YOR168W
-0.334727	0.259064	0.0756627	-6.06708	4.69565	1.37142	7.58205e-06	3.81555e-05	0.000155026	0.000669135	0.186126	0.135259	20.9367	2.92457e-06	7.56982e-06	YMR304W
-0.508078	-0.150638	0.658717	-4.6805	-1.3877	6.06821	0.000160439	0.000473657	0.181189	0.151018	7.56378e-06	4.16889e-05	20.908	2.95373e-06	7.63964e-06	YKL156W
0.152214	-0.470586	0.318372	2.01407	-6.22673	4.21265	0.0582903	0.0561195	5.41101e-06	4.77624e-05	0.000465871	0.00112559	20.8801	2.98233e-06	7.70932e-06	YPR163C
-0.0700553	0.532133	-0.462077	-0.769661	5.84626	-5.07659	0.450906	0.258722	1.21538e-05	9.22827e-05	6.57854e-05	0.000237856	20.869	2.99379e-06	7.72716e-06	YMR120C
0.205018	-0.404662	0.199643	3.21695	-6.34957	3.13261	0.00451128	0.00733638	4.18339e-06	3.92026e-05	0.00545103	0.00822434	20.847	3.0167e-06	7.79661e-06	YOL019W
0.0742787	0.505835	-0.580115	0.74612	5.08106	-5.82718	0.46467	0.263273	6.5133e-05	0.000341963	1.26631e-05	6.34401e-05	20.7956	3.07095e-06	7.9093e-06	YBR230W-A
0.539366	-0.669014	0.129649	4.8203	-5.97896	1.15867	0.000116962	0.000362615	9.1464e-06	7.26818e-05	0.260858	0.172576	20.7941	3.07249e-06	7.9093e-06	YMR182C
-0.327922	-0.00982733	0.337749	-5.40686	-0.162035	5.56889	3.1623e-05	0.000122834	0.872978	0.427061	2.2169e-05	0.000100376	20.7759	3.09193e-06	7.9526e-06	YGL116W
-0.100377	0.324741	-0.224364	-1.91281	6.18834	-4.27553	0.0708692	0.0649884	5.8665e-06	5.06356e-05	0.000403468	0.00100504	20.7627	3.10616e-06	7.99581e-06	YDR306C
-0.284842	0.738491	-0.45365	-2.41847	6.27022	-3.85175	0.0257245	0.0298121	4.93878e-06	4.46608e-05	0.00106467	0.00222454	20.6821	3.19451e-06	8.19304e-06	YMR174C
0.468774	0.155932	-0.624706	4.55612	1.51554	-6.07166	0.000212774	0.000596095	0.145993	0.128439	7.50864e-06	4.15498e-05	20.6543	3.22556e-06	8.28723e-06	YJR161C
0.152374	0.349948	-0.502321	1.86805	4.29021	-6.15824	0.0771593	0.0692366	0.000390152	0.00137537	6.25103e-06	3.59451e-05	20.6196	3.26483e-06	8.34701e-06	YLR266C
0.385353	-0.144833	-0.24052	6.25166	-2.34966	-3.902	5.13492e-06	2.76107e-05	0.0296795	0.0389255	0.000948948	0.00201265	20.6232	3.26083e-06	8.34701e-06	YOR179C
-0.555061	0.00393933	0.551123	-5.48434	0.0389231	5.44543	2.66735e-05	0.000107211	0.969355	0.453429	2.90514e-05	0.000124755	20.5896	3.2993e-06	8.44075e-06	YIL133C
0.281535	0.0537103	-0.335246	4.93257	0.941019	-5.8736	9.08382e-05	0.000297571	0.358433	0.244423	1.14603e-05	5.90182e-05	20.5836	3.30619e-06	8.45764e-06	YPR114W
-0.531662	0.105441	0.426221	-5.95685	1.18139	4.77547	9.58861e-06	4.65971e-05	0.251936	0.190573	0.000129418	0.000406668	20.5732	3.31824e-06	8.4745e-06	YGR118W
-0.01738	0.581457	-0.564077	-0.165458	5.53548	-5.37002	0.87032	0.395166	2.3848e-05	0.000156785	3.42964e-05	0.000142697	20.5116	3.39061e-06	8.64433e-06	YBR147W
-0.150431	-0.221576	0.372007	-2.52947	-3.72576	6.25524	0.0203664	0.0247075	0.00142045	0.00372178	5.09644e-06	3.08451e-05	20.4776	3.4312e-06	8.73738e-06	YML111W
-0.681502	0.0957493	0.585753	-5.81137	0.816483	4.99489	1.31017e-05	5.97126e-05	0.42428	0.273864	7.89835e-05	0.00027429	20.4708	3.4395e-06	8.7539e-06	YDR447C
-0.990095	0.280173	0.709923	-6.09777	1.72552	4.37225	7.10411e-06	3.61292e-05	0.10056	0.0975003	0.000323481	0.000852615	20.4326	3.48594e-06	8.87208e-06	YBR118W
-0.138633	-0.269593	0.408224	-2.09846	-4.08079	6.17923	0.0493769	0.0493019	0.000630048	0.00198408	5.98025e-06	3.48918e-05	20.4196	3.50185e-06	8.88843e-06	YOR271C
-0.363529	-0.074951	0.438481	-4.8636	-1.00276	5.86637	0.000106084	0.000335862	0.3285	0.22979	1.16398e-05	5.9423e-05	20.3628	3.57262e-06	9.05697e-06	YKL182W
0.085277	-0.303386	0.21811	1.70911	-6.08042	4.37133	0.103613	0.0869264	7.37039e-06	6.07881e-05	0.000324164	0.000852722	20.3375	3.60461e-06	9.12378e-06	YOR007C
0.432891	-0.209374	-0.223516	6.26847	-3.03184	-3.23662	4.95693e-06	2.69026e-05	0.00682529	0.0124306	0.00431601	0.00683067	20.3239	3.62199e-06	9.16515e-06	YER149C
-0.207621	0.499572	-0.291951	-2.593	6.2392	-3.6462	0.0177916	0.0222137	5.27102e-06	4.70787e-05	0.00170366	0.00322644	20.3186	3.62879e-06	9.17182e-06	YIL087C
-0.283754	0.580996	-0.297242	-3.06111	6.26774	-3.20662	0.00639482	0.00970051	4.96453e-06	4.47073e-05	0.0046173	0.00722618	20.3156	3.63264e-06	9.17182e-06	YJL196C
0.380722	-0.151373	-0.22935	6.22427	-2.47474	-3.74955	5.43906e-06	2.90003e-05	0.0228621	0.0315432	0.00134526	0.00267941	20.3113	3.63811e-06	9.18777e-06	YNR076W
-0.281246	-0.166298	0.447542	-3.89509	-2.30312	6.19819	0.00096409	0.00207557	0.0326663	0.0417239	5.74598e-06	3.36896e-05	20.3005	3.65201e-06	9.20369e-06	YCR052W
-0.0457617	-0.304198	0.34996	-0.753143	-5.00648	5.75962	0.460538	0.261938	7.69581e-05	0.000388945	1.46495e-05	7.14091e-05	20.27	3.69154e-06	9.29514e-06	YDR134C
-1.35446	0.834652	0.519805	-6.20307	3.82249	2.38058	5.68724e-06	3.01037e-05	0.00113844	0.00315881	0.0278373	0.0308464	20.2533	3.71348e-06	9.33608e-06	YFR053C
0.166222	-0.364943	0.198719	2.84679	-6.25015	3.40334	0.0102707	0.0142797	5.15124e-06	4.62814e-05	0.00296121	0.00501987	20.2514	3.71596e-06	9.3518e-06	YPL063W
-0.348268	0.215114	0.133154	-6.19978	3.8294	2.37037	5.72681e-06	3.02011e-05	0.00112059	0.00312946	0.0284335	0.031371	20.2407	3.73005e-06	9.36749e-06	YNL088W
-0.0695283	-0.256133	0.325662	-1.26759	-4.66964	5.93723	0.220165	0.154548	0.000164437	0.000698228	9.99933e-06	5.23714e-05	20.221	3.75618e-06	9.42383e-06	YJL014W
-0.38958	0.596805	-0.207225	-4.02001	6.15832	-2.13832	0.000724159	0.00165043	6.24999e-06	5.33027e-05	0.0456122	0.0461761	20.2192	3.75854e-06	9.42383e-06	YNL336W
-0.298609	-0.077849	0.376459	-4.69733	-1.22462	5.92197	0.000154437	0.000458842	0.235593	0.181862	1.03313e-05	5.38423e-05	20.2111	3.76935e-06	9.4394e-06	YGR092W
-1.25612	0.559732	0.696385	-6.23473	2.77823	3.4565	5.32075e-06	2.8469e-05	0.0119305	0.0192433	0.00262458	0.00457402	20.1779	3.81407e-06	9.52997e-06	YHR157W
-0.101998	-0.213969	0.315966	-1.97357	-4.14012	6.11366	0.0630605	0.0594042	0.000549999	0.00180522	6.86892e-06	3.89315e-05	20.1346	3.87306e-06	9.66065e-06	YDR190C
0.31969	-0.225556	-0.0941347	6.07165	-4.28383	-1.78783	7.50884e-06	3.78713e-05	0.00039589	0.00138909	0.0896642	0.0780767	20.1346	3.87309e-06	9.66065e-06	YIL026C
-0.382663	-0.0848617	0.467525	-4.79311	-1.06295	5.85605	0.000124364	0.000382067	0.301047	0.216562	1.19006e-05	6.07385e-05	20.1293	3.88036e-06	9.67592e-06	YJR041C
-0.210684	-0.390367	0.601051	-2.15476	-3.99247	6.14724	0.0441368	0.0454378	0.000771321	0.00232908	6.39803e-06	3.67327e-05	20.1205	3.8926e-06	9.69116e-06	YCR057C
-0.216741	0.379771	-0.163031	-3.54454	6.2107	-2.66617	0.00214824	0.00399759	5.59659e-06	4.88667e-05	0.0152076	0.0190934	20.0769	3.95341e-06	9.8308e-06	YHR078W
-0.164639	-0.147572	0.312213	-3.28385	-2.94344	6.22732	0.0038802	0.00649502	0.00830271	0.0144734	5.40429e-06	3.21751e-05	20.0707	3.96213e-06	9.83604e-06	YBR017C
0.240806	-0.324402	0.0835947	4.45414	-6.00039	1.54623	0.00026837	0.000724998	8.73763e-06	6.97933e-05	0.13844	0.108188	20.0734	3.95832e-06	9.83604e-06	YLR278C
-0.0633453	0.465708	-0.402364	-0.781122	5.74272	-4.96161	0.444296	0.255935	1.51947e-05	0.00010818	8.51036e-05	0.000290803	20.0637	3.97212e-06	9.84125e-06	YIL006W
-0.514228	0.109832	0.404396	-5.91468	1.2633	4.65138	1.04939e-05	4.98927e-05	0.22167	0.174152	0.000171386	0.000510049	20.0665	3.96818e-06	9.84125e-06	YOR227W
-0.360739	0.379287	-0.0185477	-5.25431	5.52447	-0.270154	4.42951e-05	0.000163352	2.44294e-05	0.000158655	0.789936	0.373436	20.0616	3.9751e-06	9.84645e-06	YDL174C
-0.946727	0.243147	0.70358	-5.99703	1.54021	4.45682	8.8004e-06	4.33608e-05	0.139896	0.124715	0.000266735	0.000730429	20.0614	3.97536e-06	9.84645e-06	YPR080W
-0.420939	0.640404	-0.219464	-4.02638	6.12562	-2.09923	0.000713664	0.00163589	6.69735e-06	5.61855e-05	0.0493021	0.0489427	20.0413	4.00392e-06	9.87631e-06	YJL141C
0.45066	-0.187235	-0.263425	6.19716	-2.57473	-3.62244	5.75853e-06	3.03022e-05	0.0184987	0.0267319	0.00179862	0.00337222	20.0463	3.99686e-06	9.87631e-06	YOR274W
-0.547131	0.415797	0.131334	-5.95979	4.5292	1.4306	9.52847e-06	4.63861e-05	0.000226209	0.000893714	0.168687	0.125239	20.0198	4.03473e-06	9.94053e-06	YHR104W
-0.00437567	0.399591	-0.395216	-0.0593239	5.41753	-5.35821	0.95331	0.41617	3.08891e-05	0.00018793	3.52013e-05	0.000144729	20.0144	4.04256e-06	9.95534e-06	YNR055C
0.0307177	0.442668	-0.473386	0.360226	5.19117	-5.5514	0.722627	0.353265	5.09606e-05	0.000285385	2.30324e-05	0.000103329	19.9566	4.1269e-06	1.01671e-05	YNL305C
-0.313366	0.329295	-0.015928	-5.24105	5.50746	-0.266395	4.56173e-05	0.000166392	2.53561e-05	0.000162697	0.792786	0.374595	19.9482	4.13932e-06	1.01816e-05	YJL062W
-0.741653	0.179986	0.561667	-5.95253	1.44457	4.50796	9.67748e-06	4.68717e-05	0.164767	0.140392	0.00023741	0.000667012	19.9377	4.15493e-06	1.01961e-05	YDL191W
-0.483917	0.238331	0.245588	-6.20455	3.05576	3.1488	5.66956e-06	3.00547e-05	0.00647146	0.0119366	0.00525695	0.00799587	19.906	4.20241e-06	1.02987e-05	YEL027W
-0.168893	-0.335861	0.504752	-2.0394	-4.05556	6.09494	0.0554742	0.0539278	0.00066753	0.00208251	7.14687e-06	4.01363e-05	19.908	4.19935e-06	1.02987e-05	YNR053C
-0.45665	0.69153	-0.234879	-4.02709	6.09844	-2.07134	0.000712505	0.00163586	7.09403e-06	5.88008e-05	0.0520973	0.0509797	19.8887	4.22854e-06	1.0362e-05	YKL091C
0.856041	-0.651649	-0.204394	5.93421	-4.51733	-1.41689	1.00642e-05	4.87367e-05	0.000232403	0.000913391	0.172604	0.127565	19.8644	4.26548e-06	1.04498e-05	YAL063C
0.451729	-0.225348	-0.226381	6.1923	-3.08907	-3.10324	5.81778e-06	3.05031e-05	0.00600823	0.0112979	0.00582115	0.0087034	19.826	4.32485e-06	1.05617e-05	YOR191W
-0.183888	0.325748	-0.14186	-3.48532	6.17405	-2.68874	0.0024582	0.00445626	6.04592e-06	5.20392e-05	0.0144855	0.0183696	19.8186	4.33628e-06	1.06002e-05	YOL087C
-0.1349	0.77857	-0.64367	-1.00222	5.78428	-4.78206	0.328753	0.207743	1.38899e-05	0.000101816	0.000127506	0.000401558	19.7617	4.42613e-06	1.08095e-05	YEL039C
-0.233544	-0.185268	0.418812	-3.43913	-2.72822	6.16736	0.0027302	0.0048515	0.0132998	0.0208756	6.13195e-06	3.54726e-05	19.7536	4.43896e-06	1.08233e-05	YGR094W
-0.0944813	-0.20306	0.29754	-1.91839	-4.123	6.04138	0.0701189	0.064427	0.000571987	0.00184763	8.00758e-06	4.3375e-05	19.709	4.51104e-06	1.09831e-05	YDR477W
0.330349	0.147632	-0.477983	4.16185	1.85992	-6.02179	0.000523312	0.0012561	0.0783521	0.0805332	8.34834e-06	4.49007e-05	19.6623	4.58774e-06	1.11671e-05	YER035W
0.663384	0.369997	-1.03338	3.90589	2.17848	-6.08437	0.000940524	0.00203113	0.0420849	0.0506995	7.30888e-06	4.07094e-05	19.6551	4.59973e-06	1.11805e-05	YJL144W
0.392281	-0.187382	-0.2049	6.16286	-2.94383	-3.21905	6.19038e-06	3.21414e-05	0.00829563	0.0144695	0.00449007	0.0070506	19.651	4.60662e-06	1.11939e-05	YOL031C
-0.37061	0.0449687	0.325642	-5.64653	0.685133	4.96141	1.87191e-05	8.01477e-05	0.501482	0.305552	8.51418e-05	0.000290803	19.6368	4.63024e-06	1.12315e-05	YER143W
0.613024	-0.691534	0.0785093	4.98257	-5.62069	0.638113	8.11942e-05	0.000271191	1.98017e-05	0.000134557	0.530969	0.287444	19.5876	4.71366e-06	1.14033e-05	YGR211W
0.256748	0.150162	-0.40691	3.84011	2.24592	-6.08604	0.00109344	0.00230267	0.0367174	0.0455831	7.28306e-06	4.07035e-05	19.5893	4.71066e-06	1.14033e-05	YJL053W
0.110328	-0.389184	0.278856	1.6922	-5.96927	4.27707	0.106842	0.0888625	9.3375e-06	7.38016e-05	0.000402054	0.0010033	19.575	4.73514e-06	1.14648e-05	YOR224C
-0.805511	0.669054	0.136457	-5.74722	4.77361	0.973603	1.50477e-05	6.64258e-05	0.000129962	0.000582812	0.342411	0.211783	19.567	4.74894e-06	1.14779e-05	YBR093C
-0.452839	0.721683	-0.268844	-3.81835	6.08525	-2.2669	0.0011493	0.00240402	7.29522e-06	6.03761e-05	0.0351812	0.0374212	19.5612	4.75899e-06	1.14909e-05	YHR138C
-0.897718	0.687961	0.209756	-5.8783	4.5048	1.37349	1.13454e-05	5.28859e-05	0.000239125	0.000936143	0.185492	0.134852	19.5561	4.76783e-06	1.15039e-05	YPL186C
-0.234102	-0.137125	0.371228	-3.83346	-2.24545	6.07892	0.00111021	0.00233098	0.0367528	0.0455974	7.3938e-06	4.09926e-05	19.5412	4.79374e-06	1.15298e-05	YBL076C
0.181735	-0.362175	0.180439	3.08511	-6.14822	3.0631	0.00606161	0.00928057	6.38487e-06	5.42577e-05	0.00636658	0.00936945	19.5447	4.78759e-06	1.15298e-05	YDL230W
-0.548583	0.671894	-0.123313	-4.71384	5.77342	-1.0596	0.000148772	0.00044437	1.42193e-05	0.000102763	0.302531	0.192407	19.5359	4.80297e-06	1.15427e-05	YNR014W
-0.298612	0.514553	-0.215942	-3.54943	6.1162	-2.56678	0.00212444	0.0039749	6.83211e-06	5.69583e-05	0.0188148	0.0226902	19.5081	4.8518e-06	1.16517e-05	YEL038W
0.160744	-0.332075	0.171332	2.97242	-6.14061	3.16821	0.00778735	0.0114288	6.48831e-06	5.48831e-05	0.00503314	0.00772604	19.503	4.86079e-06	1.16645e-05	YDR188W
-0.24639	0.55527	-0.308881	-2.71622	6.12134	-3.40513	0.0136501	0.0179357	6.75826e-06	5.65312e-05	0.0029492	0.00501158	19.4559	4.94477e-06	1.18451e-05	YKL221W
-0.32924	-0.00774	0.33698	-5.24747	-0.123361	5.37083	4.4972e-05	0.000164632	0.903109	0.435864	3.42353e-05	0.000142492	19.4399	4.97378e-06	1.19055e-05	YGL173C
0.0429673	-0.316449	0.273482	0.767183	-5.65021	4.88304	0.452343	0.259318	1.85697e-05	0.000128431	0.000101542	0.000335966	19.4263	4.99849e-06	1.19659e-05	YDR023W
0.269746	0.0206773	-0.290423	5.09425	0.390499	-5.48474	6.32421e-05	0.000217298	0.700484	0.376604	2.66502e-05	0.000117144	19.3673	5.1075e-06	1.22174e-05	YDR409W
-0.380253	-0.0149897	0.395244	-5.19426	-0.204759	5.39903	5.06114e-05	0.000182026	0.839924	0.418425	3.21726e-05	0.000134758	19.3623	5.11681e-06	1.22296e-05	YNR016C
-0.314987	-0.0745273	0.389516	-4.65085	-1.10041	5.75129	0.000171591	0.000500249	0.284815	0.207362	1.49159e-05	7.26238e-05	19.275	5.2831e-06	1.25997e-05	YKR103W
0.515564	-0.00174067	-0.513824	5.29035	-0.0178615	-5.27249	4.08964e-05	0.000153238	0.985934	0.456992	4.25459e-05	0.000168345	19.2297	5.37171e-06	1.28022e-05	YIL047C
-0.193167	-0.144087	0.337256	-3.47708	-2.59362	6.07073	0.00250467	0.00451961	0.0177678	0.0257786	7.52347e-06	4.15498e-05	19.1896	5.45172e-06	1.29681e-05	YGR090W
-0.273164	0.215556	0.0576073	-5.77838	4.55976	1.2186	1.40678e-05	6.32408e-05	0.000211022	0.000842558	0.23782	0.161558	19.188	5.45494e-06	1.29681e-05	YNR008W
-0.0360463	0.359544	-0.323496	-0.554413	5.52999	-4.97556	0.585723	0.307846	2.4136e-05	0.000157695	8.24814e-05	0.000284333	19.1805	5.47e-06	1.30033e-05	YDR329C
-1.14613	0.82566	0.320472	-5.90207	4.25178	1.65029	1.07813e-05	5.08862e-05	0.000425986	0.00146901	0.115216	0.0943832	19.1774	5.47616e-06	1.30146e-05	YDR077W
-0.374339	0.270944	0.103394	-5.89508	4.26682	1.62824	1.09441e-05	5.1185e-05	0.00041159	0.00142355	0.119839	0.0972498	19.1683	5.4947e-06	1.30259e-05	YML072C
-0.282268	-0.289358	0.571625	-3.00474	-3.08022	6.08495	0.00724882	0.0107285	0.00612814	0.011459	7.29982e-06	4.07094e-05	19.1455	5.54101e-06	1.31321e-05	YMR305C
-0.0197097	0.38895	-0.36924	-0.273449	5.39623	-5.12277	0.78744	0.372724	3.23717e-05	0.000195866	5.93433e-05	0.000218861	19.1089	5.61626e-06	1.32964e-05	YBR241C
-0.211226	-0.0795347	0.29076	-4.2726	-1.6088	5.88138	0.00040618	0.00101863	0.124048	0.113927	1.12704e-05	5.8311e-05	19.108	5.61826e-06	1.32964e-05	YDR524C
-0.336948	0.0901333	0.246815	-5.86728	1.56949	4.29779	1.1617e-05	5.4019e-05	0.132935	0.119894	0.000383458	0.000969799	19.0822	5.67208e-06	1.3402e-05	YLR272C
0.324498	-0.303549	-0.0209487	5.427	-5.07664	-0.350352	3.02524e-05	0.000119271	6.57788e-05	0.000342722	0.729905	0.356953	19.0781	5.68067e-06	1.34129e-05	YER075C
-0.35697	0.0456103	0.311359	-5.58	0.712962	4.86703	2.16378e-05	9.0363e-05	0.484481	0.298728	0.000105268	0.000344244	19.0731	5.69125e-06	1.34238e-05	YOR087W
0.329677	-0.29007	-0.0396063	5.55747	-4.8898	-0.667657	2.27286e-05	9.39814e-05	0.000100008	0.000476389	0.512331	0.280431	19.0416	5.75795e-06	1.35761e-05	YBL061C
-0.419675	0.244589	0.175087	-6.03934	3.51976	2.51959	8.04236e-06	4.00389e-05	0.00227293	0.00530972	0.020797	0.0245749	19.031	5.78062e-06	1.36103e-05	YER178W
0.402069	0.00604567	-0.408114	5.21322	0.0783881	-5.29161	4.8523e-05	0.0001756	0.938334	0.444724	4.07826e-05	0.000162988	19.0221	5.79961e-06	1.36445e-05	YBR111W-A
0.341898	0.070566	-0.412462	4.69821	0.969687	-5.66788	0.000154131	0.00045855	0.34431	0.237541	1.78707e-05	8.51793e-05	19.006	5.83434e-06	1.37021e-05	YBR076W
0.465662	0.055022	-0.520685	4.93293	0.582868	-5.5158	9.07652e-05	0.000297571	0.566794	0.329211	2.48969e-05	0.000110453	18.992	5.86474e-06	1.37597e-05	YOR267C
0.0979957	-0.449098	0.351102	1.25699	-5.76057	4.50359	0.223896	0.156305	1.46194e-05	0.000105153	0.000239785	0.000671672	18.9744	5.9032e-06	1.38406e-05	YEL037C
-0.725476	0.292694	0.432781	-6.01926	2.42848	3.59077	8.39339e-06	4.15601e-05	0.0251922	0.0343177	0.00193337	0.00358188	18.9662	5.92128e-06	1.38744e-05	YDR453C
0.456421	-0.064224	-0.392197	5.59049	-0.78665	-4.80384	2.11487e-05	8.88022e-05	0.441129	0.280531	0.000121386	0.00038487	18.9409	5.97723e-06	1.40019e-05	YOR300W
0.372082	-0.271441	-0.100643	5.84842	-4.26653	-1.58191	1.20975e-05	5.61605e-05	0.000411859	0.00142355	0.130071	0.103306	18.9272	6.00759e-06	1.40589e-05	YDR132C
-0.0319137	-0.357309	0.389223	-0.44669	-5.00119	5.44789	0.660117	0.33308	7.78752e-05	0.000392832	2.88949e-05	0.000124658	18.9208	6.02204e-06	1.40691e-05	YBL024W
0.281717	0.0923003	-0.374016	4.37284	1.43269	-5.80552	0.000323051	0.000843411	0.168093	0.142408	1.32681e-05	6.62021e-05	18.9164	6.03182e-06	1.40792e-05	YLR395C
0.331182	-0.152391	-0.17879	6.04186	-2.78013	-3.26172	7.99929e-06	3.99108e-05	0.0118812	0.0192099	0.00407878	0.00652499	18.9143	6.0367e-06	1.40894e-05	YNL236W
-0.287789	-0.0860157	0.373806	-4.44392	-1.32822	5.77215	0.000274699	0.000740666	0.199744	0.162042	1.42583e-05	7.05553e-05	18.8999	6.06911e-06	1.41461e-05	YNL186W
-0.4641	0.333399	0.1307	-5.85943	4.20928	1.65014	1.18146e-05	5.48591e-05	0.000469483	0.00158808	0.115246	0.0943832	18.8804	6.11327e-06	1.4226e-05	YFL039C
0.439041	0.0125927	-0.451634	5.15708	0.147916	-5.305	5.49757e-05	0.000194357	0.883957	0.430424	3.95921e-05	0.000159326	18.8758	6.12387e-06	1.4236e-05	YNL107W
-0.486869	-0.0192087	0.506076	-5.12831	-0.20233	5.33063	5.86151e-05	0.000205522	0.841796	0.418886	3.74118e-05	0.000151559	18.8743	6.12728e-06	1.4246e-05	YBR127C
0.267454	-0.446643	0.179189	3.59424	-6.0023	2.40807	0.00191816	0.00365328	8.7022e-06	6.97933e-05	0.0262892	0.0297163	18.8704	6.13604e-06	1.42559e-05	YOL163W
-0.116909	-0.326232	0.443143	-1.53726	-4.28968	5.82695	0.140615	0.109806	0.000390627	0.00137543	1.26693e-05	6.34401e-05	18.8611	6.15736e-06	1.42856e-05	YCR063W
-0.192194	0.4021	-0.209905	-2.88555	6.03703	-3.15147	0.00943278	0.0133131	8.08191e-06	6.59063e-05	0.00522564	0.00796116	18.8563	6.16847e-06	1.42856e-05	YDR255C
-0.218936	0.552854	-0.333918	-2.37443	5.99586	-3.62144	0.0281949	0.0320253	8.82249e-06	7.02458e-05	0.00180274	0.00337769	18.856	6.16916e-06	1.42856e-05	YKL188C
0.229243	-0.384012	0.154771	3.58193	-6.00021	2.4183	0.00197276	0.00373563	8.74103e-06	6.97933e-05	0.0257336	0.0292175	18.8484	6.18674e-06	1.43186e-05	YMR038C
0.60497	-0.634933	0.0299637	5.09463	-5.34696	0.252333	6.31879e-05	0.000217298	3.60866e-05	0.000213099	0.803476	0.377679	18.8236	6.24434e-06	1.44209e-05	YAL065C
-0.527155	0.291922	0.235232	-6.02075	3.3341	2.68664	8.36685e-06	4.15345e-05	0.00346383	0.00737481	0.0145513	0.0184339	18.8149	6.26466e-06	1.44537e-05	YCR004C
-0.322603	0.043184	0.279417	-5.55125	0.743097	4.80813	2.30398e-05	9.48027e-05	0.466456	0.291164	0.000120217	0.00038289	18.7814	6.34345e-06	1.46249e-05	YOR197W
-0.256969	0.457086	-0.200117	-3.37696	6.00682	-2.62985	0.00314361	0.00543431	8.61881e-06	6.93872e-05	0.0164424	0.020335	18.7522	6.41329e-06	1.47726e-05	YPL152W
0.977431	-0.450004	-0.527426	6.01222	-2.768	-3.24422	8.52014e-06	4.20552e-05	0.0121991	0.0195558	0.00424277	0.00674132	18.7287	6.47005e-06	1.48971e-05	YHR054W-A
0.388526	-0.142059	-0.246466	5.93926	-2.1716	-3.76763	9.95604e-06	4.81442e-05	0.0426706	0.0511191	0.00129074	0.00258916	18.6777	6.59503e-06	1.51824e-05	YCR095C
1.099	-0.291817	-0.807182	5.79836	-1.53964	-4.25872	1.34745e-05	6.12366e-05	0.140036	0.124802	0.000419279	0.00103617	18.6578	6.6444e-06	1.52604e-05	YHR052W-A
0.23221	0.210022	-0.442231	3.14917	2.84826	-5.99741	0.00525265	0.00830316	0.0102376	0.0171227	8.79332e-06	4.71766e-05	18.6132	6.7568e-06	1.55218e-05	YLR306W
0.412779	-0.0474623	-0.365317	5.48147	-0.630272	-4.8512	2.6842e-05	0.000107459	0.535977	0.317759	0.000109089	0.000354677	18.6061	6.7751e-06	1.55534e-05	YLR375W
0.11684	-0.386216	0.269375	1.76874	-5.84658	4.07783	0.0928881	0.0800893	1.21453e-05	9.19886e-05	0.000634327	0.00144918	18.5929	6.80884e-06	1.56079e-05	YGL060W
0.567994	-0.864795	0.2968	3.8743	-5.89879	2.02448	0.00101109	0.00216056	1.08574e-05	8.43569e-05	0.0571172	0.0546743	18.5807	6.84006e-06	1.56622e-05	YIL119C
0.334462	0.255971	-0.590433	3.38208	2.58838	-5.97046	0.00310735	0.00539495	0.017968	0.026044	9.31384e-06	4.95483e-05	18.5394	6.94763e-06	1.58995e-05	YGR213C
-0.0779153	-0.27444	0.352355	-1.26021	-4.43884	5.69903	0.222756	0.155704	0.000277898	0.00104971	1.67024e-05	8.00105e-05	18.5345	6.96044e-06	1.59077e-05	YMR078C
1.47564	-0.791504	-0.684137	5.98138	-3.20829	-2.77309	9.09927e-06	4.43703e-05	0.00460004	0.00922009	0.0120647	0.015834	18.5309	6.96988e-06	1.5916e-05	YMR319C
-0.884066	0.419192	0.464875	-5.98151	2.83621	3.1453	9.09667e-06	4.43703e-05	0.0105114	0.0174899	0.00529833	0.00804576	18.5156	7.01038e-06	1.59927e-05	YDL130W
0.268804	0.381276	-0.650081	2.46007	3.4894	-5.94948	0.0235783	0.0277617	0.0024355	0.00559708	9.74086e-06	5.13926e-05	18.4841	7.09445e-06	1.61604e-05	YPL015C
-0.357489	0.228453	0.129036	-5.90326	3.77248	2.13079	1.07538e-05	5.08862e-05	0.00127651	0.00342207	0.0463026	0.0466901	18.4828	7.09792e-06	1.61684e-05	YNR043W
-0.0691957	-0.365576	0.434771	-0.885374	-4.67762	5.56299	0.386955	0.23265	0.000161489	0.00068765	2.24565e-05	0.000101407	18.4795	7.1067e-06	1.61764e-05	YLR401C
-0.609874	0.182419	0.427454	-5.82228	1.7415	4.08077	1.27974e-05	5.85358e-05	0.0976624	0.0954598	0.00063007	0.00144063	18.4704	7.13119e-06	1.62071e-05	YLR388W
-0.009333	-0.251905	0.261237	-0.188131	-5.07779	5.2659	0.852757	0.390436	6.56105e-05	0.000342272	4.31714e-05	0.000170397	18.4582	7.16429e-06	1.62604e-05	YOR127W
-1.15087	1.25424	-0.103364	-4.93479	5.378	-0.44321	9.03875e-05	0.000297571	3.36986e-05	0.00020291	0.662588	0.33479	18.4315	7.23733e-06	1.64271e-05	YBR117C
-0.375792	0.257021	0.118771	-5.83891	3.9935	1.84542	1.23476e-05	5.69942e-05	0.000769513	0.00232766	0.0805213	0.0714365	18.4229	7.26102e-06	1.64276e-05	YBR274W
-0.0905603	-0.366925	0.457486	-1.11574	-4.52068	5.63643	0.27836	0.182834	0.000230638	0.000908076	1.9135e-05	8.93774e-05	18.4243	7.25697e-06	1.64276e-05	YKL062W
-0.209272	0.38836	-0.179087	-3.21359	5.96367	-2.75007	0.00454551	0.00737918	9.4498e-06	7.44753e-05	0.012684	0.0165453	18.426	7.25246e-06	1.64276e-05	YNL321W
-0.298174	0.109076	0.189099	-5.89673	2.1571	3.73966	1.09054e-05	5.1185e-05	0.0439304	0.0522559	0.00137603	0.00272955	18.4102	7.29608e-06	1.65032e-05	YMR275C
0.034041	-0.308396	0.274354	0.600513	-5.44037	4.83985	0.555216	0.297171	2.93763e-05	0.000180632	0.000111916	0.000361157	18.4008	7.32207e-06	1.65334e-05	YLR228C
0.389424	-0.378156	-0.0112663	5.23841	-5.08684	-0.151551	4.5885e-05	0.000167269	6.42966e-05	0.000340805	0.881129	0.400588	18.3861	7.36301e-06	1.66087e-05	YLL029W
0.195661	0.362407	-0.558069	2.06017	3.8159	-5.87608	0.0532565	0.0522437	0.00115576	0.0031951	1.13995e-05	5.87193e-05	18.384	7.36895e-06	1.66162e-05	YDR031W
-0.321812	0.289623	0.0321893	-5.40955	4.86846	0.541092	3.14361e-05	0.000122226	0.000104931	0.000495916	0.594693	0.310482	18.3579	7.44248e-06	1.67588e-05	YNR013C
-0.007248	-0.459685	0.466932	-0.0807144	-5.11909	5.19979	0.936508	0.412916	5.98324e-05	0.000323795	4.99926e-05	0.000190023	18.355	7.45076e-06	1.67662e-05	YBR213W
-0.305503	0.490928	-0.185425	-3.67075	5.89871	-2.22796	0.00161075	0.00317471	1.08591e-05	8.43569e-05	0.0380821	0.0400374	18.3493	7.46678e-06	1.6796e-05	YOR137C
0.00422467	-0.387697	0.383473	0.0565143	-5.18631	5.1298	0.955519	0.416809	5.15141e-05	0.000287116	5.842e-05	0.000216391	18.3434	7.48366e-06	1.68034e-05	YOL017W
0.386358	-0.098834	-0.287522	5.73149	-1.46617	-4.2653	1.55684e-05	6.85406e-05	0.158856	0.13711	0.000413018	0.00102339	18.3353	7.50668e-06	1.68556e-05	YDR480W
0.302359	0.138295	-0.440653	3.99165	1.82573	-5.81737	0.000772773	0.0017344	0.0835507	0.0845487	1.29335e-05	6.43249e-05	18.3063	7.59001e-06	1.70198e-05	YDR338C
0.556174	-0.334764	-0.221409	5.90842	-3.55631	-2.3521	1.06355e-05	5.02825e-05	0.00209139	0.00498118	0.02953	0.0323776	18.2997	7.60921e-06	1.70493e-05	YFR026C
-0.554047	0.522588	0.0314593	-5.29484	4.99419	0.300646	4.04922e-05	0.000152351	7.91072e-05	0.000396228	0.766929	0.367111	18.2923	7.63079e-06	1.70787e-05	YPR192W
-0.0882573	-0.286901	0.375159	-1.33805	-4.34963	5.6877	0.196578	0.141687	0.000340625	0.0012281	1.71179e-05	8.16487e-05	18.2895	7.63876e-06	1.70858e-05	YDR324C
0.123021	0.503343	-0.626364	1.10214	4.50941	-5.61155	0.284083	0.185246	0.000236627	0.000928779	2.01997e-05	9.3283e-05	18.2824	7.65954e-06	1.71151e-05	YLL041C
0.229396	-0.275172	0.0457763	4.62355	-5.54617	0.922635	0.000182558	0.000524033	2.32971e-05	0.000154166	0.367695	0.222316	18.265	7.71068e-06	1.72114e-05	YDR034C
-0.256309	-0.0849177	0.341226	-4.28217	-1.41872	5.70087	0.00039739	0.000999787	0.172075	0.144987	1.66359e-05	7.98033e-05	18.2172	7.85284e-06	1.74769e-05	YER086W
0.0957137	-0.405893	0.310179	1.33886	-5.67769	4.33882	0.196319	0.14161	1.74939e-05	0.000122237	0.00034914	0.000900828	18.2187	7.84834e-06	1.74769e-05	YKL045W
-0.203401	-0.113111	0.316511	-3.7638	-2.09304	5.85684	0.0013021	0.00267762	0.0499102	0.0574155	1.18805e-05	6.07385e-05	18.2171	7.85302e-06	1.74769e-05	YNL123W
-0.296625	0.601452	-0.304826	-2.92623	5.93337	-3.00714	0.00862442	0.0124228	1.00822e-05	7.91833e-05	0.00721043	0.0103248	18.2037	7.89353e-06	1.75503e-05	YER079W
-0.21434	0.472091	-0.25775	-2.68917	5.92298	-3.2338	0.0144719	0.0187775	1.03089e-05	8.05416e-05	0.00434346	0.00686253	18.19	7.93499e-06	1.75922e-05	YBR287W
-0.0676727	-0.238599	0.306271	-1.2476	-4.39877	5.64635	0.227242	0.158098	0.000304485	0.00113308	1.87264e-05	8.79446e-05	18.1955	7.91813e-06	1.75922e-05	YCR084C
-0.308489	0.0158347	0.292655	-5.26655	0.270331	4.99623	4.31091e-05	0.000159981	0.789802	0.403472	7.87451e-05	0.000273925	18.1904	7.93375e-06	1.75922e-05	YKR001C
0.318839	-0.084653	-0.234186	5.72349	-1.51961	-4.20389	1.58405e-05	6.89861e-05	0.144973	0.127953	0.000475309	0.00113958	18.1794	7.9672e-06	1.76652e-05	YMR013C
0.368314	-0.251848	-0.116466	5.79665	-3.96366	-1.83298	1.35241e-05	6.12366e-05	0.00082394	0.00245594	0.0824242	0.0729406	18.1558	8.0397e-06	1.78045e-05	YOR150W
0.0929287	-0.333378	0.240449	1.5997	-5.73887	4.13916	0.126059	0.101177	1.53219e-05	0.000108635	0.000551219	0.00128756	18.1401	8.08805e-06	1.78993e-05	YGR185C
-0.529459	0.342617	0.186841	-5.83815	3.77791	2.06022	1.23677e-05	5.73626e-05	0.00126073	0.00339184	0.0532511	0.0518562	18.1315	8.11499e-06	1.79276e-05	YDR256C
0.59539	0.054102	-0.649491	4.8891	0.444264	-5.33336	0.000100165	0.000321855	0.66184	0.364525	3.71867e-05	0.000150966	18.1123	8.17506e-06	1.80503e-05	YBR196C-B
-0.252687	0.341428	-0.088742	-4.22103	5.70342	-1.4824	0.000457024	0.00111809	1.65445e-05	0.000116332	0.154529	0.117011	18.1116	8.17703e-06	1.80503e-05	YDR251W
0.326334	-0.344928	0.0185937	4.97641	-5.25996	0.283543	8.23247e-05	0.000273884	4.37435e-05	0.000251069	0.779808	0.370956	18.1008	8.21105e-06	1.81005e-05	YGR040W
0.557724	0.00494933	-0.562672	5.10016	0.0452596	-5.1454	6.24137e-05	0.000215873	0.96437	0.452082	5.6424e-05	0.000209533	18.0928	8.23657e-06	1.81506e-05	YGL072C
-0.0607697	-0.372778	0.433547	-0.76534	-4.69481	5.46014	0.453413	0.259719	0.000155322	0.000669135	2.81282e-05	0.000122144	18.076	8.28996e-06	1.82446e-05	YLR192C
-0.806325	0.249432	0.556894	-5.77122	1.78529	3.98593	1.42871e-05	6.39329e-05	0.0900871	0.089597	0.000782963	0.0017176	18.0559	8.35419e-06	1.83604e-05	YKL086W
-0.581301	0.480847	0.100454	-5.52522	4.57041	0.954807	2.43893e-05	9.897e-05	0.000205971	0.000827881	0.351592	0.215237	18.0375	8.41374e-06	1.8476e-05	YOR120W
0.403941	-0.429296	0.0253543	4.95041	-5.26113	0.310724	8.72716e-05	0.000287786	4.36301e-05	0.000250974	0.759372	0.365317	18.0217	8.46508e-06	1.85915e-05	YGL215W
-0.0934877	-0.353318	0.446804	-1.17091	-4.42523	5.59612	0.256021	0.172286	0.000286657	0.00107739	2.08904e-05	9.58858e-05	18.0174	8.47901e-06	1.8597e-05	YPL183C
-0.232851	-0.213989	0.446841	-3.07349	-2.82453	5.89802	0.00622079	0.00949831	0.0107837	0.0177791	1.08754e-05	5.66628e-05	17.997	8.54617e-06	1.8734e-05	YDL042C
-0.23071	-0.192998	0.423708	-3.20699	-2.68278	5.88977	0.00461345	0.00745489	0.0146729	0.0224721	1.10694e-05	5.7596e-05	17.9834	8.59107e-06	1.88052e-05	YDL084W
-0.385187	0.493189	-0.108002	-4.38062	5.60889	-1.22828	0.000317364	0.000830888	2.03171e-05	0.000137335	0.234248	0.15959	17.9788	8.60637e-06	1.88324e-05	YDL247W
-0.268712	0.662046	-0.393335	-2.37766	5.85803	-3.48037	0.0280063	0.0318758	1.18502e-05	9.06971e-05	0.00248599	0.00438225	17.9528	8.69322e-06	1.89907e-05	YBL044W
-0.575721	0.313061	0.262659	-5.88348	3.19927	2.6842	1.12199e-05	5.25057e-05	0.00469422	0.00935901	0.0146281	0.0185062	17.9434	8.72477e-06	1.90396e-05	YKR058W
-0.297471	-0.394374	0.691846	-2.52448	-3.34684	5.87132	0.0205831	0.0249056	0.00336546	0.0071908	1.15166e-05	5.90182e-05	17.9404	8.73507e-06	1.90665e-05	YPR059C
-0.177352	-0.112395	0.289747	-3.56928	-2.262	5.83128	0.00203046	0.00383451	0.0355345	0.0444161	1.25519e-05	6.32778e-05	17.8761	8.95525e-06	1.95293e-05	YMR180C
-0.44908	0.292264	0.156815	-5.7896	3.76791	2.02169	1.37314e-05	6.18432e-05	0.00128993	0.00344576	0.0574303	0.054918	17.8566	9.0231e-06	1.96429e-05	YGR019W
0.244644	0.0524537	-0.297096	4.53206	0.971711	-5.50375	0.000224743	0.000625246	0.343328	0.237064	2.55629e-05	0.000113201	17.8467	9.05792e-06	1.97128e-05	YHR115C
-0.522618	0.104194	0.418422	-5.54704	1.10591	4.44111	2.32528e-05	9.56168e-05	0.282487	0.206116	0.000276458	0.00075193	17.8264	9.12955e-06	1.98478e-05	YBR244W
-0.707431	0.250217	0.457212	-5.78615	2.04655	3.73959	1.38339e-05	6.20943e-05	0.054701	0.0617239	0.00137625	0.00272955	17.8045	9.20784e-06	2.00042e-05	YDL075W
-0.197924	0.411434	-0.213511	-2.82056	5.86323	-3.04268	0.0108777	0.0149674	1.17184e-05	8.93991e-05	0.00666272	0.00970874	17.7833	9.2841e-06	2.01387e-05	YPL222W
0.391956	0.071763	-0.46372	4.60204	0.842584	-5.44463	0.000191692	0.00054633	0.409878	0.266916	2.91024e-05	0.000124755	17.7632	9.3569e-06	2.02947e-05	YER034W
-0.169894	-0.126517	0.296413	-3.3457	-2.49149	5.83721	0.00337419	0.00576878	0.0220695	0.0306603	1.23927e-05	6.26088e-05	17.743	9.4308e-06	2.04287e-05	YDL040C
-0.342566	0.0314943	0.311071	-5.29894	0.487167	4.81177	4.01262e-05	0.000151426	0.631678	0.353803	0.000119234	0.000381054	17.7413	9.43709e-06	2.04326e-05	YNL287W
-0.278149	0.330984	-0.0528357	-4.57896	5.44875	-0.869794	0.000202011	0.000572243	2.88407e-05	0.00017877	0.395201	0.234136	17.7217	9.50967e-06	2.05662e-05	YHR123W
-0.827994	0.259003	0.56899	-5.72021	1.78933	3.93087	1.59534e-05	6.95339e-05	0.089416	0.0891062	0.000888216	0.00190394	17.7086	9.55847e-06	2.06564e-05	YDL081C
0.692947	0.0503937	-0.74334	4.88062	0.354937	-5.23555	0.000102096	0.000326188	0.726522	0.38482	4.61771e-05	0.000179462	17.7028	9.58017e-06	2.06817e-05	YGR249W
-0.530854	0.0774097	0.453445	-5.41229	0.789226	4.62307	3.12476e-05	0.000121956	0.439658	0.28001	0.000182756	0.000535947	17.679	9.66944e-06	2.08579e-05	YLR438W
0.219971	-0.853431	0.633459	1.44978	-5.62477	4.17499	0.163326	0.123509	1.96264e-05	0.000133802	0.000507809	0.00120824	17.6383	9.82459e-06	2.11631e-05	YIL014C-A
-0.305725	-0.0210467	0.326772	-4.88074	-0.335999	5.21674	0.000102068	0.000326188	0.740531	0.389618	4.81458e-05	0.000185053	17.6309	9.85324e-06	2.12094e-05	YNL203C
-0.010213	-0.34428	0.354492	-0.147604	-4.97572	5.12332	0.884201	0.399026	8.24517e-05	0.000411207	5.9271e-05	0.000218861	17.5892	1.00156e-05	2.15138e-05	YOR370C
-0.452657	0.214141	0.238516	-5.82687	2.75655	3.07032	1.26717e-05	5.83646e-05	0.0125065	0.0198908	0.00626486	0.00924879	17.5719	1.00837e-05	2.16915e-05	YDL194W
-0.322282	0.494429	-0.172146	-3.74318	5.7426	-1.9994	0.00136499	0.00277574	1.51987e-05	0.00010818	0.0599791	0.0568847	17.5749	1.0072e-05	2.16915e-05	YPL229W
0.385817	0.0245357	-0.410353	4.87841	0.310238	-5.18865	0.000102604	0.000327064	0.759736	0.395438	5.12468e-05	0.000193538	17.5166	1.03055e-05	2.2064e-05	YDR225W
0.547385	-0.048267	-0.499117	5.2552	-0.46339	-4.7918	4.42081e-05	0.000163198	0.648316	0.359594	0.000124731	0.0003937	17.5083	1.03392e-05	2.2064e-05	YMR016C
-0.155747	0.39456	-0.238814	-2.28115	5.77893	-3.49779	0.0341708	0.0370536	1.40511e-05	0.000102533	0.00238943	0.00423168	17.5225	1.02817e-05	2.2064e-05	YPL219W
0.357111	-0.324491	-0.032619	5.26181	-4.78117	-0.480621	4.35649e-05	0.000161623	0.000127762	0.00057666	0.63624	0.325569	17.5028	1.03617e-05	2.22209e-05	YBR233W
0.605701	-0.496205	-0.109497	5.45646	-4.47006	-0.986403	2.83565e-05	0.000112904	0.000258809	0.0010002	0.336254	0.209171	17.4856	1.0432e-05	2.22209e-05	YDL012C
-0.402949	0.681727	-0.278779	-3.4181	5.78288	-2.3648	0.00286372	0.00504711	1.39318e-05	0.000101816	0.0287636	0.0316732	17.4822	1.04461e-05	2.22209e-05	YJL185C
0.480002	-0.41211	-0.0678917	5.37191	-4.61211	-0.759806	3.41535e-05	0.000132389	0.000187359	0.000773732	0.456637	0.259282	17.4783	1.04618e-05	2.23961e-05	YJR154W
-0.019284	0.292509	-0.273226	-0.342564	5.19618	-4.85363	0.735664	0.35702	5.03953e-05	0.00028414	0.000108495	0.000353154	17.4677	1.05059e-05	2.23961e-05	YLR248W
0.320793	-0.174635	-0.146157	5.7979	-3.1563	-2.64159	1.34878e-05	6.12366e-05	0.00516942	0.0100469	0.0160332	0.0198901	17.4265	1.06782e-05	2.28032e-05	YDR487C
-0.667853	0.300639	0.367212	-5.79022	2.60651	3.1837	1.3713e-05	6.18432e-05	0.0172851	0.0252854	0.00486129	0.00752014	17.3922	1.08237e-05	2.29378e-05	YBR284W
-0.00112467	-0.295015	0.29614	-0.0191149	-5.01409	5.03322	0.984948	0.424546	7.56579e-05	0.000383666	7.24856e-05	0.000255508	17.3985	1.07968e-05	2.29378e-05	YLR256W
0.437769	-0.15659	-0.281178	5.72516	-2.04789	-3.67726	1.57832e-05	6.89861e-05	0.054558	0.0616549	0.00158699	0.00305906	17.405	1.07691e-05	2.29378e-05	YLR437C
0.171605	0.277105	-0.44871	2.19777	3.54892	-5.74667	0.0404809	0.0423377	0.0021269	0.00504515	1.50653e-05	7.3218e-05	17.3897	1.08343e-05	2.29378e-05	YOR071C
-0.640016	0.133956	0.506061	-5.49625	1.15037	4.34589	2.59866e-05	0.000104852	0.264176	0.196957	0.000343552	0.000889675	17.3792	1.08794e-05	2.31108e-05	YER056C-A
-0.245248	-0.097216	0.342462	-4.02793	-1.59667	5.62458	0.000711137	0.00163406	0.126735	0.116005	1.96346e-05	9.14129e-05	17.376	1.08932e-05	2.31108e-05	YOR332W
0.382376	-0.028971	-0.353404	5.20159	-0.394102	-4.80748	4.9794e-05	0.000179379	0.697866	0.375639	0.000120394	0.00038302	17.3464	1.10216e-05	2.3303e-05	YKL016C
-0.190009	-0.161452	0.351461	-3.12666	-2.65675	5.78341	0.00552418	0.00864695	0.0155192	0.0234018	1.39158e-05	6.89446e-05	17.3321	1.10843e-05	2.34948e-05	YLR057W
-0.484741	0.0641573	0.420582	-5.32058	0.704199	4.61637	3.82515e-05	0.000146437	0.489797	0.300561	0.000185557	0.000542012	17.2746	1.13403e-05	2.38979e-05	YLR185W
-0.330351	0.21174	0.11861	-5.69777	3.65201	2.04574	1.67483e-05	7.22395e-05	0.0016812	0.0042354	0.054788	0.0529676	17.2303	1.15418e-05	2.42796e-05	YBR059C
0.163521	-0.323734	0.160214	2.91728	-5.77555	2.85828	0.00879634	0.0125862	1.4154e-05	0.000102763	0.010015	0.0136136	17.2477	1.14622e-05	2.42796e-05	YPL169C
0.356693	0.317568	-0.674262	3.04875	2.71434	-5.76308	0.00657334	0.00990519	0.0137058	0.021357	1.45404e-05	7.10436e-05	17.192	1.17195e-05	2.46392e-05	YGR066C
0.409727	-0.18494	-0.224786	5.7569	-2.59851	-3.15838	1.47361e-05	6.54078e-05	0.0175834	0.0255851	0.00514539	0.0078602	17.1899	1.17295e-05	2.46392e-05	YKL106W
-0.412103	0.53546	-0.123356	-4.23875	5.50756	-1.2688	0.000438878	0.00108221	2.53507e-05	0.000162697	0.219742	0.152817	17.2039	1.16643e-05	2.46392e-05	YOR396C-A
-0.300794	0.18116	0.119633	-5.72127	3.44576	2.27549	1.59166e-05	6.92068e-05	0.00268939	0.00602867	0.0345689	0.0368993	17.1605	1.18679e-05	2.50392e-05	YDR099W
-0.215919	-0.26253	0.478448	-2.59402	-3.15401	5.74802	0.0177527	0.0221809	0.00519598	0.0100855	1.50215e-05	7.28587e-05	17.1372	1.1979e-05	2.52284e-05	YPL226W
-0.0301057	0.313623	-0.283516	-0.500468	5.21357	-4.71308	0.622457	0.321124	4.84854e-05	0.000275492	0.000149026	0.000455063	17.1125	1.20976e-05	2.54171e-05	YDR239C
0.274354	-0.0216507	-0.252704	5.17206	-0.408153	-4.76391	5.31733e-05	0.000189191	0.687696	0.372247	0.000132842	0.00041557	17.101	1.21535e-05	2.55841e-05	YDR377W
-0.297643	-0.0857363	0.383379	-4.25239	-1.2249	5.47729	0.000425393	0.00105547	0.235488	0.181862	2.70895e-05	0.000118714	17.0914	1.22001e-05	2.55841e-05	YGR258C
0.576597	-0.0656147	-0.510981	5.24936	-0.597359	-4.652	4.47835e-05	0.000164115	0.557277	0.325799	0.000171148	0.000509881	17.081	1.2251e-05	2.57288e-05	YIR041W
-0.41542	0.195622	0.219798	-5.74429	2.70499	3.0393	1.51433e-05	6.65527e-05	0.0139857	0.0216586	0.00671306	0.00975682	17.0802	1.22553e-05	2.57288e-05	YNR033W
-0.416083	0.00261533	0.413467	-4.99299	0.0313839	4.96159	7.93209e-05	0.000266435	0.975289	0.454599	8.51071e-05	0.000290803	17.0792	1.22601e-05	2.57288e-05	YOR190W
-0.459596	0.0287277	0.430868	-5.12625	0.320423	4.80582	5.88845e-05	0.000206057	0.752123	0.39297	0.000120845	0.00038402	17.0546	1.23815e-05	2.58945e-05	YCL057W
0.199906	0.210128	-0.410035	2.79948	2.94263	-5.74212	0.0113902	0.0155125	0.00831771	0.0144842	1.52143e-05	7.3576e-05	17.0516	1.23967e-05	2.58945e-05	YOL116W
0.393573	0.0152533	-0.408827	4.87308	0.188861	-5.06195	0.000103843	0.000330637	0.852192	0.421827	6.79744e-05	0.000243307	17.0301	1.25038e-05	2.60596e-05	YDR475C
0.479244	0.171814	-0.651058	4.07607	1.46131	-5.53738	0.000636897	0.00148542	0.160171	0.137929	2.37488e-05	0.000105798	17.0323	1.24927e-05	2.60596e-05	YDR540C
0.075313	0.396441	-0.471754	0.851436	4.48189	-5.33332	0.405065	0.240212	0.000251931	0.00097738	3.71901e-05	0.000150966	16.9786	1.27653e-05	2.65739e-05	YBR120C
-0.0911927	-0.300561	0.391754	-1.27434	-4.20009	5.47443	0.217814	0.153097	0.000479462	0.00161245	2.72597e-05	0.000119404	16.9709	1.28052e-05	2.65739e-05	YDL156W
-0.041932	-0.39318	0.435111	-0.500554	-4.69351	5.19405	0.622398	0.321124	0.000155781	0.000669977	5.06351e-05	0.000191527	16.979	1.27633e-05	2.65739e-05	YDL198C
-0.654718	0.336822	0.317897	-5.72728	2.94642	2.78087	1.57109e-05	6.87641e-05	0.00824837	0.0144204	0.0118621	0.0156181	16.9648	1.28367e-05	2.65739e-05	YFL052W
-0.347483	0.167377	0.180107	-5.72891	2.75952	2.96939	1.56557e-05	6.87641e-05	0.0124263	0.0198341	0.00783966	0.0110849	16.9773	1.27723e-05	2.65739e-05	YJR066W
-0.043109	-0.346437	0.389548	-0.577822	-4.64356	5.2214	0.570127	0.301843	0.000174455	0.000735578	4.76505e-05	0.000184018	16.9451	1.29385e-05	2.66925e-05	YDR065W
-0.429589	0.682316	-0.252728	-3.56548	5.66304	-2.09757	0.00204814	0.00386268	1.80593e-05	0.000125555	0.0494642	0.0489998	16.9531	1.28972e-05	2.66925e-05	YIL113W
0.173112	0.235078	-0.40819	2.41854	3.28427	-5.70281	0.0257209	0.0298121	0.0038765	0.00807636	1.65661e-05	7.98033e-05	16.9446	1.29413e-05	2.66925e-05	YMR274C
-0.07971	-0.247183	0.326893	-1.3386	-4.15104	5.48964	0.196402	0.141633	0.000536427	0.00177076	2.63658e-05	0.000116191	16.945	1.29392e-05	2.66925e-05	YOR098C
-0.145637	-0.184894	0.330533	-2.51466	-3.19249	5.70717	0.0210152	0.0252302	0.00476626	0.00946503	1.64104e-05	7.91123e-05	16.9203	1.30689e-05	2.70838e-05	YCR014C
-0.55978	-1.65847	2.21825	-1.38684	-4.10882	5.49566	0.181448	0.133709	0.000590863	0.00189041	2.60199e-05	0.00011461	16.893	1.32137e-05	2.7268e-05	YOR382W
-0.164115	0.321036	-0.15692	-2.91932	5.71067	-2.79134	0.00875676	0.0125553	1.62864e-05	0.000115463	0.0115944	0.0153087	16.8646	1.33661e-05	2.76582e-05	YPR091C
-0.274826	-0.159581	0.434408	-3.56884	-2.07229	5.64115	0.0020325	0.00383576	0.052	0.0592759	1.89394e-05	8.87368e-05	16.8397	1.35012e-05	2.78185e-05	YHR084W
-0.211372	-0.308664	0.520036	-2.3066	-3.3683	5.67491	0.0324336	0.0356393	0.00320588	0.00693847	1.75996e-05	8.38937e-05	16.8456	1.34693e-05	2.78185e-05	YOR066W
-0.253922	0.350666	-0.0967437	-3.99358	5.51514	-1.52155	0.000769357	0.0017295	2.49332e-05	0.000160519	0.14449	0.111667	16.7801	1.38314e-05	2.84132e-05	YPR106W
-0.367856	0.127198	0.240658	-5.60562	1.93832	3.66729	2.04624e-05	8.69306e-05	0.0674922	0.0722316	0.00162353	0.00311455	16.7623	1.39314e-05	2.85954e-05	YPL176C
0.203468	-0.330962	0.127494	3.46938	-5.64333	2.17394	0.00254887	0.00459642	1.88497e-05	0.000129515	0.0424707	0.0435603	16.7557	1.3969e-05	2.873e-05	YKL015W
-0.0524403	-0.290914	0.343355	-0.806637	-4.47483	5.28148	0.429796	0.250341	0.000256013	0.000991938	4.17075e-05	0.000165642	16.7415	1.40496e-05	2.873e-05	YLR060W
-0.732553	0.838095	-0.105542	-4.56701	5.22499	-0.657985	0.000207573	0.000583862	4.72716e-05	0.000269184	0.518392	0.282812	16.7492	1.40059e-05	2.873e-05	YPL230W
-0.15911	-0.318458	0.477567	-1.85995	-3.72268	5.58262	0.0783487	0.0701047	0.0014305	0.00373834	2.15147e-05	9.79991e-05	16.7121	1.42188e-05	2.91164e-05	YDR174W
0.316789	0.160221	-0.477011	3.70782	1.87528	-5.58311	0.00147995	0.00296279	0.0761102	0.0789145	2.14919e-05	9.79991e-05	16.6957	1.43143e-05	2.92493e-05	YBR201W
-0.336946	0.095727	0.24122	-5.51373	1.56646	3.94729	2.501e-05	0.000101257	0.133642	0.120495	0.000855433	0.00185059	16.6958	1.43132e-05	2.92493e-05	YNL138W
-0.516101	-0.125638	0.641737	-4.31258	-1.04984	5.3624	0.000370714	0.000942456	0.306882	0.219553	3.48775e-05	0.000144339	16.7026	1.42738e-05	2.92493e-05	YNL277W-A
-0.378675	-0.020958	0.399634	-4.77797	-0.26444	5.04243	0.000128687	0.000392333	0.79427	0.404873	7.10071e-05	0.000251165	16.6575	1.45384e-05	2.9634e-05	YLR374C
-0.286274	0.138037	0.148237	-5.66868	2.73336	2.93533	1.78394e-05	7.66425e-05	0.0131525	0.0207309	0.0084528	0.0118211	16.6218	1.4752e-05	3.01976e-05	YDL195W
-0.242144	-0.116167	0.358311	-3.75439	-1.80115	5.55554	0.00133044	0.0027239	0.0874738	0.0876349	2.28247e-05	0.000102594	16.6157	1.4789e-05	3.01976e-05	YDL226C
0.537764	-0.266471	-0.271294	5.66572	-2.80745	-2.85827	1.79546e-05	7.73846e-05	0.0111937	0.0182849	0.0100153	0.0136136	16.5978	1.48971e-05	3.03519e-05	YOR047C
-0.609422	0.234462	0.37496	-5.61507	2.16028	3.4548	2.00453e-05	8.53275e-05	0.0436518	0.0520045	0.00263478	0.00457402	16.5908	1.49401e-05	3.03519e-05	YOR167C
-0.427761	0.164381	0.263379	-5.61181	2.15652	3.45529	2.01881e-05	8.59188e-05	0.0439815	0.0522731	0.00263184	0.00457402	16.5738	1.50445e-05	3.05306e-05	YOL075C
0.438687	-0.320542	-0.118145	5.4703	-3.99706	-1.47323	2.7508e-05	0.000109951	0.000763248	0.00231865	0.156961	0.118409	16.57	1.50678e-05	3.07091e-05	YJR078W
0.130135	0.20774	-0.337876	2.16055	3.44897	-5.60953	0.0436281	0.0450069	0.00266988	0.00599832	2.02888e-05	9.35912e-05	16.5559	1.5155e-05	3.08621e-05	YBL085W
-0.32581	0.105924	0.219885	-5.54668	1.80327	3.74339	2.32712e-05	9.56168e-05	0.0871278	0.0873755	0.00136433	0.00271164	16.556	1.51546e-05	3.08621e-05	YGR116W
0.115462	-0.426256	0.310794	1.48031	-5.4649	3.9846	0.155081	0.11862	2.78358e-05	0.000173998	0.000785361	0.00172152	16.5225	1.53636e-05	3.12427e-05	YGR157W
-0.320225	0.341873	-0.021647	-4.72458	5.04396	-0.319378	0.0001452	0.000436965	7.07637e-05	0.00036373	0.752903	0.363194	16.499	1.55127e-05	3.13435e-05	YGL161C
0.249441	-0.0275043	-0.221936	5.15123	-0.567995	-4.58322	5.5697e-05	0.000196335	0.576649	0.33238	0.000200062	0.000577663	16.4985	1.5516e-05	3.13435e-05	YGR028W
-0.452069	0.287501	0.164569	-5.58111	3.5494	2.03172	2.15856e-05	9.0363e-05	0.00212456	0.00504421	0.0563142	0.0540529	16.5024	1.54913e-05	3.13435e-05	YOR020W-A
0.244117	0.118732	-0.362848	3.72718	1.8128	-5.53999	0.00141584	0.00285489	0.0855946	0.0860386	2.36141e-05	0.000105687	16.5005	1.5503e-05	3.13435e-05	YPR079W
-0.188708	0.607157	-0.418449	-1.71443	5.5161	-3.80166	0.102614	0.0862691	2.48809e-05	0.000160519	0.00119404	0.00243308	16.4832	1.56139e-05	3.14946e-05	YBR298C
0.262124	-0.192122	-0.0700023	5.45352	-3.99713	-1.45641	2.85397e-05	0.000113141	0.00076314	0.00231865	0.161507	0.121026	16.49	1.55702e-05	3.14946e-05	YHL050C
0.0236547	0.513906	-0.537562	0.219705	4.77316	-4.99288	0.82843	0.383872	0.000130093	0.000582812	7.93399e-05	0.000274993	16.4628	1.57451e-05	3.15685e-05	YGL188C
-0.225655	0.327516	-0.10186	-3.79951	5.51462	-1.71509	0.00119992	0.002495	2.49616e-05	0.000160819	0.102491	0.0864765	16.4727	1.56812e-05	3.15685e-05	YJL005W
-0.296787	0.0886763	0.208111	-5.49693	1.64242	3.85453	2.59476e-05	0.000104751	0.116849	0.108741	0.00105793	0.00221704	16.4666	1.57206e-05	3.15685e-05	YMR190C
-0.122175	-0.197352	0.319527	-2.13791	-3.45341	5.59132	0.0456496	0.0465942	0.00264308	0.00595146	2.11101e-05	9.66457e-05	16.4626	1.57464e-05	3.15685e-05	YNL247W
0.181766	-0.252013	0.0702473	3.94468	-5.46918	1.52451	0.00086057	0.00189348	2.75758e-05	0.000173106	0.143753	0.111219	16.4753	1.56643e-05	3.15685e-05	YOL068C
0.407592	-0.263898	-0.143695	5.55843	-3.59884	-1.9596	2.26812e-05	9.39814e-05	0.00189812	0.00464203	0.0647847	0.0605305	16.4379	1.59075e-05	3.19449e-05	YDL092W
-0.151189	-0.217079	0.368268	-2.2991	-3.30108	5.60017	0.0329371	0.0360744	0.00373224	0.00782453	2.07067e-05	9.52791e-05	16.3886	1.62338e-05	3.24691e-05	YDR158W
0.550301	-0.096106	-0.454196	5.27219	-0.920749	-4.35145	4.25743e-05	0.000158335	0.368653	0.248788	0.000339214	0.000880989	16.4003	1.61555e-05	3.24691e-05	YJR022W
-0.480773	0.418877	0.0618967	-5.17464	4.50844	0.666204	5.28686e-05	0.000188603	0.000237153	0.000929632	0.51324	0.280794	16.3892	1.62296e-05	3.24691e-05	YMR261C
0.409898	-0.17715	-0.232749	5.61103	-2.42498	-3.18606	2.02227e-05	8.59188e-05	0.025377	0.0345381	0.00483557	0.00749272	16.3784	1.63027e-05	3.25908e-05	YBR239C
0.323717	-0.285841	-0.0378763	5.14796	-4.54564	-0.602334	5.61036e-05	0.000197496	0.000217907	0.000865457	0.554029	0.29549	16.3825	1.62749e-05	3.25908e-05	YHR031C
0.109524	-0.374553	0.265027	1.60065	-5.47393	3.87326	0.125848	0.101072	2.72896e-05	0.000171941	0.0010135	0.00213347	16.3828	1.62725e-05	3.25908e-05	YKL068W-A
0.371851	-0.0473257	-0.324524	5.16814	-0.657751	-4.51037	5.36391e-05	0.000190371	0.518539	0.311137	0.000236113	0.000664031	16.3682	1.63711e-05	3.27645e-05	YBL021C
-0.216346	-0.181006	0.397352	-3.05789	-2.55838	5.61628	0.00644089	0.0097651	0.0191538	0.0274064	1.99928e-05	9.28167e-05	16.352	1.64813e-05	3.29379e-05	YMR266W
0.521398	-0.646772	0.125373	4.27212	-5.29938	1.02725	0.000406628	0.00101884	4.0087e-05	0.000234869	0.317122	0.199878	16.3351	1.65964e-05	3.3111e-05	YAR029W
0.778951	-1.23995	0.461001	3.49212	-5.55885	2.06672	0.00242045	0.00440169	2.26606e-05	0.000151528	0.0525742	0.051357	16.3273	1.66502e-05	3.32838e-05	YAR068W
-0.236682	0.529778	-0.293095	-2.5046	5.60618	-3.10157	0.0214669	0.0256973	2.04373e-05	0.000137702	0.0058428	0.00872648	16.3118	1.67573e-05	3.34296e-05	YBL049W
-0.549711	0.115344	0.434366	-5.32364	1.11704	4.20659	3.79934e-05	0.000145489	0.277817	0.204193	0.000472381	0.0011345	16.2988	1.68477e-05	3.34296e-05	YGL147C
-0.287173	0.50198	-0.214808	-3.19982	5.5933	-2.39349	0.00468842	0.00755857	2.10191e-05	0.000141435	0.0270996	0.0302795	16.2879	1.6924e-05	3.36017e-05	YOR003W
0.294017	0.0102853	-0.304301	4.77223	0.166943	-4.93916	0.000130367	0.000397022	0.869168	0.426305	8.95035e-05	0.000302142	16.2688	1.70583e-05	3.39723e-05	YMR286W
0.302949	0.133414	-0.436362	3.79544	1.67145	-5.46688	0.00121117	0.00251278	0.110919	0.104942	2.77153e-05	0.000120591	16.2304	1.73326e-05	3.43422e-05	YDR227W
-0.237903	-0.106373	0.344276	-3.77981	-1.69005	5.46987	0.00125527	0.00259466	0.107257	0.10241	2.75339e-05	0.000120092	16.2224	1.73902e-05	3.45132e-05	YNL035C
-0.761664	0.398756	0.362907	-5.59571	2.92954	2.66617	2.09089e-05	8.80929e-05	0.00856165	0.0148304	0.0152077	0.0190934	16.2017	1.75405e-05	3.46564e-05	YFR032C-A
-0.0417067	0.626003	-0.584297	-0.333519	5.00601	-4.67249	0.742373	0.359092	7.70397e-05	0.000388945	0.000163379	0.000491947	16.202	1.75384e-05	3.46564e-05	YGR236C
-0.141827	0.35316	-0.211334	-2.23072	5.55465	-3.32395	0.0378698	0.0401074	2.28695e-05	0.000152525	0.0035443	0.00582912	16.159	1.78549e-05	3.53642e-05	YDL054C
-0.208357	-0.249559	0.457916	-2.53977	-3.04199	5.58175	0.0199266	0.0243004	0.00667292	0.012242	2.15553e-05	9.82956e-05	16.1526	1.7903e-05	3.53642e-05	YJL187C
-1.26711	1.25194	0.0151743	-4.87008	4.81175	0.0583218	0.000104549	0.000332129	0.000119238	0.000547211	0.954098	0.418669	16.1574	1.78673e-05	3.53642e-05	YOL052C-A
-0.171253	0.371229	-0.199976	-2.57502	5.58193	-3.00691	0.0184874	0.0228577	2.15469e-05	0.000144479	0.00721402	0.0103248	16.1423	1.79801e-05	3.55055e-05	YPL128C
0.0363893	-0.338717	0.302329	0.546737	-5.08911	4.54239	0.590884	0.309194	6.39717e-05	0.000340414	0.00021952	0.000627405	16.1426	1.79772e-05	3.55055e-05	YPR135W
-0.28281	0.000481333	0.282328	-4.83897	0.00823576	4.83072	0.000112138	0.000352635	0.993514	0.459166	0.000114244	0.000366773	16.1152	1.81844e-05	3.58432e-05	YFL044C
-0.303195	0.231313	0.071883	-5.34261	4.07597	1.26665	3.64343e-05	0.000139745	0.000637034	0.00199772	0.220493	0.153169	16.1186	1.81586e-05	3.58432e-05	YLR324W
-0.399478	0.261134	0.138342	-5.49431	3.59157	1.90272	2.60971e-05	0.000105104	0.00192987	0.00470439	0.0722459	0.0656442	16.0998	1.83011e-05	3.60117e-05	YGR086C
-0.35071	1.18494	-0.834228	-1.6072	5.43022	-3.82302	0.124399	0.100277	3.00393e-05	0.000183197	0.00113707	0.00234789	16.0925	1.83574e-05	3.61799e-05	YOL085C
-0.390588	-0.398768	0.789356	-2.75804	-2.8158	5.57384	0.0124662	0.0166697	0.0109915	0.0180623	2.19309e-05	9.94998e-05	16.064	1.85774e-05	3.65155e-05	YPL136W
-0.277463	-0.0619743	0.339437	-4.27802	-0.955543	5.23357	0.000401181	0.00100742	0.35123	0.240918	4.63804e-05	0.00017999	16.0645	1.85732e-05	3.65155e-05	YPR190C
0.252495	-0.451835	0.19934	3.10629	-5.55864	2.45236	0.00578159	0.00894976	2.26706e-05	0.000151528	0.0239631	0.0275747	16.0497	1.86892e-05	3.66829e-05	YMR007W
0.670775	-1.18233	0.511557	3.14904	-5.55062	2.40157	0.00525411	0.00830316	2.30715e-05	0.000153517	0.0266475	0.0299888	16.0262	1.8874e-05	3.70461e-05	YDL039C
-0.239266	-0.243038	0.482304	-2.75983	-2.80334	5.56317	0.0124176	0.0166365	0.0112947	0.0184299	2.24478e-05	0.000101118	16.0023	1.90637e-05	3.73793e-05	YBR073W
0.258452	0.032004	-0.290458	4.51285	0.558823	-5.07169	0.000234785	0.00064867	0.582769	0.335074	6.65099e-05	0.000239463	15.994	1.91303e-05	3.73793e-05	YPR107C
0.627105	-0.354972	-0.272133	5.54392	-3.13813	-2.40579	2.34118e-05	9.57464e-05	0.00538417	0.0103755	0.0264141	0.0297977	15.9839	1.92117e-05	3.75455e-05	YHR210C
0.609892	-0.0222383	-0.587653	4.89719	-0.178565	-4.71863	9.83581e-05	0.000318009	0.860158	0.423472	0.000147167	0.000450364	15.9526	1.94662e-05	3.80724e-05	YLR164W
0.097991	0.202919	-0.300911	1.77327	3.67209	-5.44536	0.0921139	0.0796918	0.00160586	0.00408693	2.90558e-05	0.000124755	15.9528	1.94639e-05	3.80724e-05	YMR036C
0.399466	-0.292538	-0.106929	5.36134	-3.92623	-1.43513	3.49593e-05	0.000134926	0.000897714	0.00261121	0.167407	0.124585	15.9315	1.96392e-05	3.82077e-05	YGR017W
0.364999	-0.0867807	-0.278217	5.31341	-1.26329	-4.05009	3.88628e-05	0.000147923	0.221672	0.174152	0.000675936	0.00153427	15.9359	1.96033e-05	3.82077e-05	YPR071W
-0.107001	0.730373	-0.623371	-0.752596	5.13712	-4.38452	0.460859	0.262053	5.74748e-05	0.000314713	0.000314553	0.000833772	15.9183	1.97491e-05	3.83726e-05	YGR131W
-1.03387	0.259233	0.774633	-5.33087	1.33667	3.9942	3.73917e-05	0.000143388	0.197019	0.160393	0.000768275	0.00169596	15.9107	1.9812e-05	3.85072e-05	YMR170C
-0.259842	-0.13541	0.395253	-3.58825	-1.86993	5.45819	0.00194452	0.00369967	0.0768852	0.0794186	2.82488e-05	0.000122201	15.9126	1.97961e-05	3.85072e-05	YOR153W
-0.219007	-0.151805	0.370812	-3.25761	-2.25802	5.51563	0.00411673	0.00682006	0.0358241	0.0446952	2.49065e-05	0.000110453	15.9019	1.98859e-05	3.86414e-05	YNL085W
0.0217197	0.453618	-0.475337	0.224347	4.68551	-4.90985	0.824868	0.383296	0.000158629	0.000681253	9.55983e-05	0.000318555	15.8943	1.99493e-05	3.86414e-05	YNL144C
0.359057	0.163944	-0.523001	3.72022	1.69863	-5.41885	0.00143858	0.00289447	0.105602	0.101184	3.07997e-05	0.000130256	15.8869	2.0012e-05	3.87751e-05	YBR018C
-0.063402	0.414956	-0.351555	-0.786255	5.14592	-4.35968	0.441354	0.255161	5.63593e-05	0.000309843	0.000332904	0.000870922	15.8924	1.99652e-05	3.87751e-05	YJR094C
0.186123	-0.415787	0.229663	2.47483	-5.52861	3.05377	0.0228575	0.0270183	2.42091e-05	0.000157695	0.00650018	0.00952619	15.8615	2.0227e-05	3.9102e-05	YLR372W
0.295226	0.043454	-0.338679	4.43648	0.653002	-5.08948	0.000279393	0.000750431	0.52153	0.312268	6.39191e-05	0.000232482	15.8601	2.02395e-05	3.9102e-05	YOR311C
0.4989	-0.0869213	-0.41198	5.1836	-0.903118	-4.28049	5.18249e-05	0.000185627	0.377701	0.252854	0.00039892	0.000998132	15.8588	2.02501e-05	3.92346e-05	YGR161W-C
0.346552	-0.0459197	-0.300633	5.09731	-0.675415	-4.4219	6.2812e-05	0.000216721	0.507499	0.307661	0.000288839	0.000778826	15.8533	2.02975e-05	3.92346e-05	YPR073C
-0.395216	0.289396	0.105821	-5.34705	3.91536	1.43169	3.60793e-05	0.000138784	0.000920348	0.00266161	0.168376	0.125087	15.846	2.03602e-05	3.93973e-05	YBR052C
-0.401469	0.325049	0.0764207	-5.21016	4.2184	0.991766	4.88547e-05	0.00017682	0.000459791	0.00156862	0.333698	0.208026	15.83	2.04986e-05	3.95598e-05	YPL134C
0.020545	0.254193	-0.274738	0.371296	4.59386	-4.96515	0.7145	0.350616	0.000195287	0.000795559	8.44296e-05	0.000289819	15.8196	2.05885e-05	3.96912e-05	YDL091C
-0.403098	0.524625	-0.121527	-4.05991	5.28389	-1.22399	0.000660912	0.00153631	4.14849e-05	0.000240727	0.235826	0.160471	15.8218	2.05694e-05	3.96912e-05	YJR160C
0.303028	0.0713477	-0.374374	4.21482	0.992375	-5.20717	0.000463573	0.00112873	0.333408	0.231917	4.91798e-05	0.000187744	15.8093	2.06789e-05	3.98223e-05	YNL066W
0.196566	-0.295193	0.0986273	3.61666	-5.43132	1.81467	0.00182251	0.00350085	2.99667e-05	0.000183197	0.085297	0.0751002	15.8121	2.06538e-05	3.98223e-05	YNR027W
-0.0884567	-0.230052	0.318508	-1.48698	-3.86723	5.35421	0.153325	0.117599	0.0010276	0.00290208	3.55133e-05	0.000145537	15.7989	2.07694e-05	3.99222e-05	YBR028C
0.312363	0.137353	-0.449714	3.74525	1.64687	-5.3921	0.00135854	0.00276927	0.115923	0.108151	3.26675e-05	0.000136647	15.7919	2.08312e-05	3.99222e-05	YBR058C-A
0.424578	0.0466727	-0.471249	4.51882	0.496741	-5.01554	0.000231616	0.000640547	0.625035	0.35152	7.54113e-05	0.000264403	15.7948	2.08059e-05	3.99222e-05	YDL241W
0.331112	-0.0491513	-0.28196	5.1186	-0.759822	-4.35877	5.98971e-05	0.000208773	0.456628	0.287173	0.000333596	0.000871921	15.779	2.09457e-05	4.00524e-05	YLL056C
-0.671952	0.404555	0.267396	-5.48751	3.30381	2.1837	2.64887e-05	0.000106561	0.0037093	0.00778187	0.0416453	0.0428387	15.7859	2.0884e-05	4.00524e-05	YNL274C
-0.359384	-0.014421	0.373806	-4.68543	-0.188012	4.87344	0.000158658	0.000469886	0.852848	0.421838	0.000103759	0.000342094	15.7661	2.10599e-05	4.03736e-05	YKL047W
0.220414	-0.407084	0.186671	2.98649	-5.51577	2.52929	0.0075483	0.011113	2.48987e-05	0.000160519	0.0203743	0.0242143	15.7665	2.10564e-05	4.03736e-05	YLR086W
-0.249848	-0.189143	0.438992	-3.13105	-2.37031	5.50136	0.00547013	0.00858154	0.028437	0.0376642	2.56972e-05	0.000113465	15.7481	2.12214e-05	4.05338e-05	YPL238C
0.407768	0.0894567	-0.497225	4.2435	0.930943	-5.17444	0.000434134	0.00107335	0.363489	0.246393	5.2892e-05	0.000199428	15.735	2.13397e-05	4.06938e-05	YML053C
0.180058	0.824783	-1.00484	0.926859	4.24562	-5.17248	0.365552	0.223919	0.000432032	0.00148815	5.31238e-05	0.000199646	15.7316	2.13707e-05	4.08535e-05	YCL048W-A
0.325272	0.196962	-0.522234	3.4005	2.05911	-5.45961	0.0029803	0.00521645	0.053368	0.0606039	2.81611e-05	0.000122201	15.7219	2.14591e-05	4.09816e-05	YJR008W
-0.735469	0.038588	0.696881	-4.89751	0.256959	4.64056	9.82882e-05	0.000318009	0.799955	0.406697	0.000175646	0.000519976	15.7135	2.15354e-05	4.09816e-05	YLR264W
0.343458	-0.0386553	-0.304802	5.03092	-0.566218	-4.4647	7.28586e-05	0.000247008	0.577832	0.332879	0.000261992	0.000720246	15.7059	2.16051e-05	4.11407e-05	YBL095W
-0.114632	-0.212157	0.32679	-1.90477	-3.52529	5.43007	0.0719646	0.0657344	0.00224451	0.00526259	3.0049e-05	0.00012764	15.698	2.16776e-05	4.12996e-05	YJL071W
0.294575	0.100145	-0.39472	3.95295	1.34386	-5.2968	0.000844419	0.00186381	0.194724	0.159473	4.0317e-05	0.00016122	15.6795	2.18487e-05	4.14583e-05	YIL020C
0.0219413	0.28006	-0.302	0.358656	4.57789	-4.93654	0.723782	0.35346	0.0002025	0.000819338	9.00322e-05	0.000303127	15.6683	2.19536e-05	4.18067e-05	YOR380W
0.219488	0.0867743	-0.306262	3.82384	1.51175	-5.3356	0.00113493	0.00237931	0.146949	0.129042	3.70028e-05	0.000150807	15.6409	2.22109e-05	4.21546e-05	YBR211C
0.370655	-0.275197	-0.0954587	5.29329	-3.93007	-1.36324	4.0631e-05	0.000152522	0.000889857	0.00259336	0.188646	0.136701	15.6227	2.23846e-05	4.2502e-05	YIL120W
-0.239944	-0.337412	0.577355	-2.27185	-3.19471	5.46655	0.034827	0.0376485	0.00474257	0.0094242	2.77353e-05	0.000120591	15.5978	2.26236e-05	4.28488e-05	YOL101C
0.169262	0.193169	-0.36243	2.56273	2.92469	-5.4874	0.0189776	0.0233671	0.00865372	0.014964	2.64954e-05	0.000116449	15.5917	2.26825e-05	4.30057e-05	YKR088C
-0.199286	0.5168	-0.317513	-2.09878	5.44266	-3.34387	0.0493464	0.049289	2.92288e-05	0.00017977	0.00338812	0.0056249	15.5834	2.27629e-05	4.30968e-05	YDR504C
-0.054929	0.337184	-0.282254	-0.833361	5.11563	-4.28225	0.414931	0.243916	6.02958e-05	0.000325916	0.000397322	0.000995019	15.5809	2.27868e-05	4.30968e-05	YMR155W
-0.273132	-0.0352037	0.308336	-4.44209	-0.572535	5.01463	0.000275846	0.000742328	0.573631	0.331495	7.55651e-05	0.000264774	15.5826	2.2771e-05	4.30968e-05	YNL311C
-0.325981	0.001016	0.324966	-4.7588	0.014832	4.74399	0.000134384	0.000407482	0.98832	0.457749	0.000138961	0.00043183	15.5637	2.2955e-05	4.34419e-05	YLR452C
-0.0195747	0.346902	-0.327328	-0.27487	4.87124	-4.59638	0.786364	0.372638	0.000104274	0.000493586	0.00019417	0.000563543	15.4877	2.37149e-05	4.47302e-05	YOR228C
-0.227684	-0.094564	0.322248	-3.76094	-1.56203	5.32297	0.00131065	0.00269077	0.13468	0.121214	3.80502e-05	0.000153511	15.4833	2.37595e-05	4.48849e-05	YOL049W
-0.308814	0.235501	0.073313	-5.23258	3.99037	1.24223	4.6482e-05	0.000169235	0.000775047	0.00233798	0.229175	0.157661	15.4583	2.4016e-05	4.52278e-05	YMR205C
-0.522721	0.402394	0.120327	-5.21514	4.01464	1.20049	4.83169e-05	0.000175103	0.00073312	0.00224069	0.244611	0.164616	15.4274	2.43378e-05	4.57586e-05	YJL159W
-0.0146547	-0.266963	0.281617	-0.252403	-4.59801	4.8504	0.803423	0.377277	0.000193454	0.000791304	0.000109286	0.000354748	15.419	2.44262e-05	4.59122e-05	YPL030W
-0.0169773	0.445353	-0.428374	-0.183641	4.81731	-4.63366	0.856228	0.390987	0.000117752	0.000541216	0.000178418	0.000526519	15.4118	2.45018e-05	4.60655e-05	YOL110W
-0.096983	-0.194036	0.291019	-1.78616	-3.57362	5.35977	0.0899424	0.0782242	0.0020105	0.00484355	3.5081e-05	0.000144729	15.4039	2.45848e-05	4.62187e-05	YLR429W
0.0784763	-0.287099	0.208623	1.44276	-5.2782	3.83545	0.165272	0.124572	4.20114e-05	0.000243159	0.00110516	0.00229888	15.3913	2.47187e-05	4.63716e-05	YGL092W
-0.357929	0.317257	0.0406707	-4.98105	4.41505	0.565985	8.14719e-05	0.000271545	0.000293388	0.00110132	0.577987	0.304344	15.3817	2.48209e-05	4.64893e-05	YCL039W
0.0277793	-0.282862	0.255083	0.485918	-4.94785	4.46192	0.632547	0.324416	8.7774e-05	0.000429797	0.000263652	0.000723396	15.3825	2.48126e-05	4.64893e-05	YML061C
-0.567419	-0.092484	0.659904	-4.3302	-0.705782	5.03599	0.000356088	0.0009144	0.488835	0.300154	7.20376e-05	0.000254383	15.3769	2.48724e-05	4.66416e-05	YDR037W
-0.00916433	-0.276101	0.285266	-0.154058	-4.64142	4.79548	0.879179	0.39764	0.000175302	0.000736418	0.000123698	0.000391318	15.3608	2.50458e-05	4.67938e-05	YNL207W
0.117324	-0.391548	0.274222	1.59115	-5.31017	3.719	0.127975	0.102305	3.91422e-05	0.000229906	0.00144258	0.0028332	15.3599	2.50555e-05	4.69457e-05	YFR034C
-0.494944	0.278009	0.216934	-5.43386	3.05219	2.38166	2.97997e-05	0.000117634	0.00652313	0.0119988	0.0277744	0.0308436	15.3442	2.52259e-05	4.7062e-05	YCL043C
-0.285961	0.000310333	0.285652	-4.7206	0.00512293	4.71549	0.000146513	0.000439498	0.995966	0.459594	0.000148216	0.000453081	15.3459	2.52076e-05	4.7062e-05	YML007W
0.267699	-0.210144	-0.057556	5.17248	-4.06041	-1.1121	5.3123e-05	0.000189075	0.000660152	0.00206592	0.279884	0.181576	15.3315	2.53644e-05	4.74e-05	YLR466W
0.0414213	0.288021	-0.329442	0.628058	4.36717	-4.99522	0.537396	0.291254	0.000327257	0.00119415	7.89248e-05	0.000274282	15.3111	2.559e-05	4.77375e-05	YOR097C
-0.418849	-0.276482	0.69533	-3.25392	-2.14791	5.40183	0.00415107	0.00686365	0.0447461	0.0528687	3.19752e-05	0.000134321	15.2981	2.57336e-05	4.78166e-05	YGR239C
-0.270681	-0.0209057	0.291588	-4.52674	-0.349617	4.87638	0.000227477	0.000631597	0.730448	0.386067	0.000103075	0.000340238	15.3021	2.569e-05	4.78166e-05	YHR165C
0.251805	-0.239212	-0.012592	4.82749	-4.58606	-0.241408	0.00011508	0.000358625	0.000198775	0.000806864	0.811809	0.380324	15.3028	2.56816e-05	4.78166e-05	YJL225C
-0.901297	0.446436	0.454861	-5.43851	2.69384	2.74468	2.94965e-05	0.000116779	0.0143268	0.0219945	0.0128334	0.0167092	15.2934	2.57869e-05	4.78953e-05	YLR044C
-0.255751	-0.362983	0.618732	-2.2368	-3.17464	5.41143	0.0374052	0.0397597	0.00496106	0.00972359	3.13067e-05	0.000131974	15.2926	2.57956e-05	4.78953e-05	YLR406C
0.449506	0.350221	-0.799726	3.04855	2.3752	-5.42373	0.00657627	0.00990519	0.02815	0.0374227	3.04705e-05	0.000129182	15.2881	2.5846e-05	4.78953e-05	YOR178C
-0.176164	-0.428516	0.604681	-1.53977	-3.74546	5.28524	0.140004	0.109451	0.0013579	0.00357656	4.1362e-05	0.00016515	15.2815	2.59196e-05	4.80094e-05	YDR253C
0.70854	-0.0179347	-0.690605	4.76769	-0.12068	-4.647	0.000131712	0.000400247	0.905203	0.435954	0.000173096	0.00051405	15.2839	2.58924e-05	4.80094e-05	YMR325W
0.202535	-0.263385	0.0608513	3.9919	-5.19125	1.19936	0.000772334	0.0017344	5.09516e-05	0.000285385	0.24504	0.164786	15.2779	2.59595e-05	4.8159e-05	YBL103C
0.236234	0.0641273	-0.300361	4.05713	1.10134	-5.15846	0.000665127	0.00154355	0.284422	0.207177	5.48066e-05	0.000205489	15.2642	2.61141e-05	4.83083e-05	YDL159W
-0.548276	0.616084	-0.0678073	-4.40687	4.9519	-0.545015	0.000298911	0.000792211	8.69798e-05	0.000429797	0.592045	0.309774	15.249	2.6287e-05	4.86423e-05	YBR148W
-0.173727	0.378278	-0.204552	-2.48762	5.41662	-2.92901	0.02225	0.0264762	3.09512e-05	0.000188158	0.00857158	0.0119515	15.2036	2.68102e-05	4.95303e-05	YPL057C
-0.277577	-0.0266503	0.304226	-4.46605	-0.428788	4.89482	0.000261185	0.000711079	0.672869	0.367907	9.88841e-05	0.000327996	15.1973	2.68841e-05	4.96783e-05	YFL045C
0.109597	0.287647	-0.397244	1.44752	3.79914	-5.24666	0.163949	0.123746	0.00120094	0.00328083	4.50525e-05	0.000175918	15.1861	2.70153e-05	4.9826e-05	YOL113W
-0.261208	0.126022	0.135187	-5.41677	2.61337	2.80343	3.09406e-05	0.000120953	0.0170333	0.0250265	0.0112925	0.0149471	15.1772	2.71206e-05	4.99735e-05	YCL045C
0.15092	0.328994	-0.479915	1.66565	3.63097	-5.29662	0.112084	0.0924805	0.00176394	0.00439604	4.03326e-05	0.00016122	15.171	2.71932e-05	5.01208e-05	YJL213W
0.0310957	0.367239	-0.398336	0.380072	4.48863	-4.86872	0.708081	0.348713	0.000248089	0.000964962	0.000104868	0.000343735	15.1656	2.72576e-05	5.02679e-05	YJL016W
-0.376499	0.437616	-0.0611187	-4.29996	4.99798	-0.698032	0.000381555	0.000967277	7.84371e-05	0.000394536	0.49356	0.273348	15.1518	2.74217e-05	5.04148e-05	YLR356W
-0.390788	0.506465	-0.115678	-3.98424	5.16361	-1.17938	0.000786007	0.00175846	5.41818e-05	0.000301053	0.252713	0.16878	15.1419	2.75404e-05	5.05614e-05	YML133W-B
0.0393357	-0.279686	0.240349	0.702853	-4.99745	4.29457	0.490617	0.273307	7.85307e-05	0.000394536	0.000386283	0.000974888	15.1363	2.76071e-05	5.07079e-05	YOL021C
-0.193641	0.456831	-0.263189	-2.28285	5.38562	-3.10276	0.0340526	0.036954	3.31371e-05	0.000199697	0.00582735	0.00870804	15.1127	2.78927e-05	5.12213e-05	YLR317W
0.233604	-0.328283	0.0946787	3.73506	-5.24887	1.5138	0.00139058	0.00281408	4.48322e-05	0.000256899	0.146431	0.112641	15.0953	2.81055e-05	5.15505e-05	YPL237W
-0.186479	-0.186417	0.372896	-2.7008	-2.69991	5.40073	0.0141128	0.0183968	0.01414	0.0218079	3.20529e-05	0.00013454	15.0811	2.82805e-05	5.18792e-05	YHR020W
-0.603896	0.159702	0.444195	-5.20831	1.37735	3.83097	4.90557e-05	0.000177314	0.184315	0.153241	0.00111657	0.00231748	15.0632	2.85023e-05	5.22074e-05	YPR184W
0.200154	-0.334663	0.134509	3.20701	-5.36221	2.1552	0.00461323	0.00745489	3.48923e-05	0.000208055	0.0440981	0.0449255	15.0575	2.85744e-05	5.23136e-05	YGL070C
0.39179	-0.130373	-0.261418	5.29805	-1.76299	-3.53507	4.02052e-05	0.000151426	0.0938786	0.0926031	0.00219506	0.0039623	15.0544	2.86128e-05	5.23136e-05	YHR082C
-0.218975	-0.0812013	0.300177	-3.80445	-1.41079	5.21525	0.00118645	0.00247249	0.174371	0.146634	4.83049e-05	0.000185063	15.0505	2.86612e-05	5.2458e-05	YGL150C
0.241418	-0.228597	-0.0128217	4.79246	-4.53794	-0.254527	0.000124544	0.0003822	0.000221756	0.000879584	0.801806	0.377132	15.0376	2.88244e-05	5.26022e-05	YPR204W
0.311036	0.110815	-0.421852	3.83287	1.36556	-5.19844	0.00111171	0.00233237	0.187928	0.15543	5.01428e-05	0.000190146	15.0217	2.90248e-05	5.28513e-05	YBR161W
-0.293738	-0.00717967	0.300917	-4.61119	-0.112709	4.72389	0.000187749	0.000536732	0.911436	0.437137	0.000145425	0.000446491	15.0257	2.89746e-05	5.28513e-05	YJR092W
-0.287678	-0.321596	0.609274	-2.54396	-2.8439	5.38785	0.01975	0.0241271	0.0103358	0.0172677	3.29746e-05	0.000137696	15.0248	2.89855e-05	5.28513e-05	YPL113C
0.0685897	0.307375	-0.375964	0.922974	4.13618	-5.05914	0.367522	0.224732	0.000554992	0.00180963	6.84019e-05	0.000244117	15.0132	2.91335e-05	5.29948e-05	YDR126W
0.38062	-0.133537	-0.247082	5.3092	-1.86269	-3.44651	3.92257e-05	0.000148458	0.0779445	0.0802398	0.00268486	0.00464266	15.0066	2.92177e-05	5.3138e-05	YBR076C-A
-0.262468	-0.0640717	0.32654	-4.08509	-0.997219	5.08231	0.000623872	0.00145991	0.331112	0.230612	6.49512e-05	0.000235874	14.9986	2.93213e-05	5.32811e-05	YOL098C
-0.0599827	-0.254843	0.314824	-0.96576	-4.10313	5.06887	0.346222	0.215858	0.000598614	0.00190878	6.69302e-05	0.000240596	14.9812	2.95456e-05	5.36056e-05	YGL105W
-0.169929	0.506187	-0.336259	-1.77515	5.28784	-3.5127	0.0917946	0.0794893	4.11242e-05	0.000238867	0.00230973	0.00412168	14.9776	2.9592e-05	5.37482e-05	YKR046C
0.241822	0.049882	-0.291703	4.17029	0.860229	-5.0305	0.0005133	0.00123525	0.400321	0.262853	7.29277e-05	0.000256596	14.9727	2.96559e-05	5.38905e-05	YDR302W
-0.134489	0.265045	-0.130555	-2.72794	5.3761	-2.64815	0.0133079	0.0175672	3.38396e-05	0.000203106	0.0158087	0.0196897	14.945	3.00193e-05	5.43952e-05	YIL065C
-0.350485	0.155468	0.195016	-5.36403	2.37937	2.98464	3.47524e-05	0.00013434	0.027907	0.0372572	0.00757926	0.01076	14.94	3.00853e-05	5.45368e-05	YDR122W
0.040484	0.258421	-0.298906	0.67064	4.28088	-4.95154	0.51047	0.28129	0.000398564	0.00139522	8.70487e-05	0.0002955	14.9232	3.0309e-05	5.48593e-05	YKL146W
-1.41984	0.9148	0.505042	-5.29804	3.41351	1.88453	4.02064e-05	0.000151426	0.00289367	0.0063727	0.0747887	0.0671986	14.916	3.04047e-05	5.50004e-05	YBR296C
-0.205423	-0.174636	0.38006	-2.89955	-2.465	5.36457	0.00914657	0.0129824	0.0233352	0.0320929	3.47113e-05	0.000143936	14.9124	3.04532e-05	5.51413e-05	YDL167C
0.282576	-0.312984	0.0304063	4.39452	-4.8674	0.472868	0.000307454	0.000811012	0.00010518	0.000496314	0.641661	0.327397	14.9003	3.06164e-05	5.52819e-05	YNR029C
-0.147368	-0.204306	0.351674	-2.23881	-3.10381	5.34262	0.0372527	0.0396428	0.00581365	0.0110215	3.64334e-05	0.000149009	14.8873	3.07912e-05	5.55225e-05	YFR009W
-0.174375	-0.111463	0.285839	-3.24711	-2.0756	5.32274	0.00421524	0.00694465	0.0516609	0.0590011	3.80696e-05	0.000153511	14.8852	3.082e-05	5.55225e-05	YLR131C
-0.0706777	0.320712	-0.250034	-1.12543	5.10685	-3.98141	0.274335	0.181211	6.14885e-05	0.000330621	0.000791115	0.00173008	14.8903	3.07511e-05	5.55225e-05	YOR014W
-0.121016	-0.32769	0.448707	-1.39816	-3.78596	5.18413	0.178074	0.131673	0.00123772	0.00335997	5.17636e-05	0.000195543	14.8784	3.09128e-05	5.56624e-05	YBR083W
-0.0588403	-0.23593	0.29477	-1.01152	-4.05584	5.06734	0.3244	0.205503	0.000667096	0.00208251	6.71599e-05	0.000241058	14.874	3.09724e-05	5.57619e-05	YDR035W
0.237583	-0.490492	0.252908	2.59747	-5.36249	2.76501	0.0176226	0.0220676	3.48708e-05	0.000208055	0.0122786	0.0160986	14.8732	3.09843e-05	5.57619e-05	YLR175W
0.028387	0.249957	-0.278345	0.496809	4.37457	-4.87139	0.624988	0.321985	0.000321775	0.00117849	0.00010424	0.000342876	14.8613	3.11464e-05	5.58612e-05	YLL019C
0.412478	-0.101676	-0.310802	5.14534	-1.26833	-3.87702	5.64319e-05	0.000198303	0.219908	0.173126	0.00100482	0.00211837	14.8614	3.11448e-05	5.58612e-05	YLL064C
-0.518632	0.140495	0.378136	-5.18248	1.40391	3.77856	5.19547e-05	0.000185868	0.176381	0.147829	0.00125886	0.00253606	14.8587	3.11823e-05	5.60004e-05	YMR143W
-0.178067	-0.356602	0.534669	-1.75168	-3.50796	5.25964	0.0958537	0.0817397	0.00233478	0.00543194	4.37747e-05	0.000172281	14.8351	3.15094e-05	5.64982e-05	YOL157C
0.322093	-0.207021	-0.115072	5.28337	-3.39581	-1.88756	4.15334e-05	0.000154864	0.00301216	0.00659506	0.0743594	0.0669198	14.8249	3.16519e-05	5.6816e-05	YDR539W
0.0127877	-0.266166	0.253378	0.227924	-4.74407	4.51614	0.822125	0.382402	0.000138935	0.000612399	0.00023303	0.000657807	14.806	3.19169e-05	5.71333e-05	YIL142W
0.509385	-0.301914	-0.20747	5.31781	-3.15188	-2.16592	3.8486e-05	0.000147001	0.00522081	0.0101142	0.0431601	0.0441475	14.7892	3.21563e-05	5.75053e-05	YCL059C
0.224663	-0.016124	-0.208539	4.79377	-0.344048	-4.44973	0.000124177	0.000381911	0.734565	0.387472	0.000271081	0.00073945	14.7871	3.21858e-05	5.75053e-05	YCR090C
-0.177214	-0.241122	0.418336	-2.25655	-3.07032	5.32688	0.0359317	0.0385301	0.00626485	0.0116208	3.77228e-05	0.000152335	14.7856	3.22065e-05	5.75053e-05	YGL201C
0.127549	0.291329	-0.418879	1.58826	3.62768	-5.21595	0.128626	0.102737	0.00177724	0.0044182	4.82305e-05	0.000185063	14.7836	3.2235e-05	5.75053e-05	YPL036W
-0.046418	-0.324016	0.370434	-0.614675	-4.29068	4.90535	0.546015	0.294442	0.000389735	0.00137537	9.65704e-05	0.000321506	14.7704	3.24251e-05	5.7821e-05	YBR121C-A
0.529589	-0.0729413	-0.456648	4.92955	-0.678957	-4.2506	9.14571e-05	0.000299514	0.505301	0.30692	0.00042714	0.00104914	14.7631	3.25304e-05	5.79579e-05	YBR010W
-0.065134	-0.328391	0.393524	-0.823511	-4.15196	4.97546	0.420371	0.246286	0.000535301	0.00177076	8.24996e-05	0.000284333	14.709	3.33209e-05	5.93421e-05	YDL003W
0.202043	0.140047	-0.34209	3.13162	2.17069	-5.30231	0.00546315	0.0085754	0.0427493	0.0511926	3.98284e-05	0.000159902	14.6956	3.35191e-05	5.96559e-05	YKL171W
-0.224565	0.269077	-0.0445113	-4.14914	4.97157	-0.822409	0.000538755	0.00128655	8.32226e-05	0.000414011	0.420983	0.244833	14.687	3.36486e-05	5.97912e-05	YPR021C
0.374701	0.114941	-0.489641	3.89929	1.19612	-5.0954	0.000954864	0.00205729	0.246273	0.187891	6.30796e-05	0.000230167	14.6835	3.37005e-05	5.99263e-05	YLL054C
0.0191157	-0.239898	0.220781	0.381701	-4.79027	4.40854	0.706892	0.348321	0.000125162	0.00056808	0.000297772	0.00080061	14.6592	3.40674e-05	6.05944e-05	YBR245C
-0.564011	0.738979	-0.174969	-3.88707	5.09293	-1.20586	0.000981946	0.00211099	6.34283e-05	0.000338418	0.242583	0.163721	14.6501	3.42052e-05	6.07288e-05	YOR316C-A
0.392274	0.0709073	-0.463181	4.18244	0.756016	-4.93845	0.000499225	0.00120448	0.458854	0.288059	8.96467e-05	0.000302142	14.6333	3.44627e-05	6.12178e-05	YLL055W
-0.402263	0.0139653	0.388299	-4.68227	0.162554	4.51972	0.000159799	0.000472266	0.872575	0.427061	0.000231139	0.000654625	14.6076	3.48609e-05	6.18395e-05	YDR001C
-0.198704	0.339489	-0.140784	-3.09595	5.28948	-2.19352	0.00591663	0.00909342	4.09755e-05	0.000238746	0.0408295	0.0422778	14.6066	3.48767e-05	6.18395e-05	YHR101C
0.33898	-0.087838	-0.251141	5.11544	-1.32553	-3.78989	6.03213e-05	0.000209125	0.200615	0.162486	0.00122665	0.00248728	14.5766	3.53471e-05	6.25038e-05	YKR068C
0.0228667	-0.28568	0.262813	0.381764	-4.76949	4.38772	0.706846	0.348321	0.000131179	0.0005842	0.00031226	0.000831613	14.5276	3.61314e-05	6.37843e-05	YGR152C
0.235021	-0.34759	0.11257	3.51202	-5.19418	1.68217	0.00231333	0.00424713	5.06202e-05	0.000284735	0.108795	0.0904435	14.5268	3.61444e-05	6.37843e-05	YHR003C
0.0672257	0.246987	-0.314214	1.07701	3.95693	-5.03395	0.294879	0.19073	0.000836757	0.00248676	7.23663e-05	0.000255475	14.5317	3.60641e-05	6.37843e-05	YJL137C
-0.0697943	-0.206553	0.276347	-1.28708	-3.80904	5.09612	0.213432	0.150691	0.00117406	0.00323186	6.29787e-05	0.000230101	14.5241	3.61878e-05	6.39157e-05	YBR060C
0.337479	-0.684685	0.347205	2.61148	-5.29822	2.68674	0.0171025	0.0215804	4.01901e-05	0.000234997	0.014548	0.0184339	14.5151	3.63346e-05	6.40469e-05	YKL220C
-1.00012	0.44796	0.552161	-5.2867	2.36794	2.91876	4.1228e-05	0.000153949	0.028577	0.037783	0.00876769	0.0121827	14.5033	3.65265e-05	6.43087e-05	YAL038W
-0.200902	-0.106515	0.307418	-3.40847	-1.80712	5.2156	0.00292694	0.00512946	0.0865058	0.0868096	4.82674e-05	0.000185063	14.5069	3.64679e-05	6.43087e-05	YNL244C
-0.296133	-0.0577347	0.353869	-4.12871	-0.804941	4.93366	0.000564561	0.0013379	0.43075	0.276022	9.06153e-05	0.000304783	14.4894	3.67548e-05	6.47914e-05	YOR157C
-0.25912	0.369177	-0.110056	-3.61712	5.15344	-1.53631	0.00182057	0.00349953	5.54225e-05	0.000304906	0.140847	0.109544	14.4779	3.69454e-05	6.49216e-05	YBR269C
-0.0171723	-0.225812	0.242984	-0.334975	-4.40484	4.73981	0.741291	0.358817	0.000300298	0.00112027	0.000140281	0.000435451	14.4706	3.70668e-05	6.52274e-05	YHR119W
-0.418429	0.408189	0.010241	-4.63481	4.52139	0.113436	0.000177952	0.000514506	0.000230266	0.000908076	0.910867	0.408235	14.4557	3.73169e-05	6.55328e-05	YNL173C
-0.438841	0.478707	-0.0398647	-4.36754	4.7643	-0.39675	0.000326984	0.000851296	0.000132726	0.000589345	0.695945	0.344949	14.4536	3.73514e-05	6.56622e-05	YLR070C
-0.0694957	0.354838	-0.285341	-0.97631	4.98494	-4.00861	0.341102	0.213506	8.07645e-05	0.000404072	0.000743322	0.00165255	14.4331	3.76978e-05	6.60492e-05	YDL018C
0.025496	0.303744	-0.329239	0.367725	4.38086	-4.74857	0.717117	0.351247	0.000317187	0.00116452	0.00013753	0.000427856	14.4346	3.76727e-05	6.60492e-05	YDR005C
-0.347477	0.206273	0.141203	-5.253	3.11835	2.13465	4.44236e-05	0.000163505	0.00562776	0.0107385	0.0459477	0.0464322	14.4342	3.76796e-05	6.60492e-05	YNR074C
0.29487	-0.047932	-0.246939	4.92204	-0.800093	-4.12196	9.30143e-05	0.00030336	0.433486	0.27737	0.000573354	0.00133152	14.4281	3.77834e-05	6.61314e-05	YHR116W
0.039798	-0.340224	0.300425	0.565057	-4.83053	4.26546	0.578606	0.305138	0.000114292	0.00053426	0.000412864	0.00102339	14.4247	3.78399e-05	6.61314e-05	YMR062C
0.109945	0.246217	-0.356161	1.59116	3.56332	-5.15447	0.127972	0.102305	0.00205824	0.00492822	5.52966e-05	0.000206537	14.4075	3.81348e-05	6.66095e-05	YDR529C
-0.222693	-0.124163	0.346855	-3.34406	-1.86449	5.20853	0.00338674	0.00578316	0.07768	0.0800337	4.90314e-05	0.00018749	14.4042	3.81924e-05	6.67375e-05	YGR204W
-0.177176	-0.125524	0.302699	-3.07272	-2.17693	5.24965	0.00623149	0.00949908	0.042216	0.0507621	4.47554e-05	0.000175234	14.3875	3.84809e-05	6.72145e-05	YDR394W
-0.7105	0.446541	0.26396	-5.21653	3.27853	1.93801	4.81677e-05	0.000174967	0.00392705	0.00816472	0.0675326	0.0625576	14.3797	3.86162e-05	6.73419e-05	YPR030W
-0.667008	0.367305	0.299702	-5.2602	2.89667	2.36353	4.37202e-05	0.000161779	0.00920488	0.0157274	0.0288394	0.0317318	14.3555	3.90404e-05	6.79921e-05	YBR297W
-0.32905	0.127898	0.201153	-5.22436	2.03065	3.19372	4.73384e-05	0.000171923	0.0564332	0.0632701	0.00475309	0.00738934	14.3454	3.92198e-05	6.8293e-05	YJL002C
0.272098	-0.22949	-0.0426083	4.89491	-4.12841	-0.766502	9.88655e-05	0.000318889	0.000564955	0.00183278	0.452738	0.257744	14.3364	3.93784e-05	6.85934e-05	YEL077C
0.461812	-0.170301	-0.291511	5.2048	-1.91936	-3.28545	4.94395e-05	0.000178167	0.0699881	0.0741646	0.00386627	0.00624542	14.3284	3.95217e-05	6.87195e-05	YDR542W
0.229034	-0.272596	0.0435607	4.11619	-4.89909	0.782871	0.000580976	0.00137274	9.79398e-05	0.000467828	0.443292	0.254115	14.3246	3.959e-05	6.88454e-05	YDR310C
0.145653	0.392177	-0.53783	1.37777	3.70969	-5.08745	0.184188	0.135182	0.00147363	0.0038245	6.42087e-05	0.000233272	14.3195	3.96814e-05	6.89231e-05	YAR066W
0.35118	-0.102725	-0.248455	5.11766	-1.49699	-3.62068	6.00229e-05	0.000208861	0.150721	0.131569	0.00180584	0.00338126	14.319	3.96901e-05	6.89231e-05	YCR073C
-0.23588	0.0523287	0.183552	-5.00801	1.111	3.89703	7.66941e-05	0.000258319	0.280344	0.205199	0.000959804	0.00203261	14.3054	3.99351e-05	6.9222e-05	YIL147C
-0.272936	0.37402	-0.101083	-3.70875	5.08231	-1.37355	0.0014768	0.00295861	6.49506e-05	0.000341963	0.185474	0.134852	14.2951	4.01229e-05	6.95206e-05	YJL151C
-0.270307	0.0402047	0.230103	-4.87188	0.724629	4.14726	0.000104126	0.000331161	0.477455	0.295987	0.000541085	0.00127234	14.2912	4.01938e-05	6.96455e-05	YNL049C
-0.139772	-0.381011	0.520783	-1.36262	-3.71441	5.07702	0.188839	0.137848	0.00145781	0.00378669	6.57221e-05	0.000237801	14.2807	4.03845e-05	6.99434e-05	YNL124W
-0.273029	-0.00855233	0.281583	-4.47855	-0.140286	4.61886	0.000253852	0.000693138	0.889902	0.432389	0.00018451	0.000539964	14.2743	4.05033e-05	7.00678e-05	YAL012W
-0.172445	0.322	-0.149556	-2.80849	5.2442	-2.43572	0.0111684	0.0152773	4.52989e-05	0.00025878	0.0248131	0.0283556	14.2436	4.10709e-05	7.0958e-05	YLR058C
-0.289102	0.321625	-0.0325237	-4.28525	4.76733	-0.482087	0.0003946	0.000996736	0.00013182	0.000586187	0.635217	0.32534	14.244	4.10632e-05	7.0958e-05	YLR454W
0.330426	-0.060169	-0.270256	4.92694	-0.897172	-4.02975	9.19951e-05	0.000300448	0.380785	0.25424	0.000708187	0.00158825	14.2424	4.10935e-05	7.0958e-05	YMR220W
-0.351568	0.0515157	0.300051	-4.8574	0.711761	4.14562	0.000107576	0.0003402	0.485207	0.298963	0.000543119	0.00127606	14.2316	4.12959e-05	7.12046e-05	YEL001C
0.436128	-0.208137	-0.227992	5.24444	-2.50285	-2.7416	4.52751e-05	0.000165513	0.0215465	0.0301005	0.0129192	0.0167821	14.2308	4.1311e-05	7.12046e-05	YEL020W-A
0.328172	0.075279	-0.403453	4.01017	0.919887	-4.93007	0.000740674	0.00167851	0.369092	0.248917	9.13498e-05	0.00030674	14.213	4.16462e-05	7.16722e-05	YNL042W
-0.245502	0.842657	-0.597155	-1.48421	5.09438	-3.61017	0.154052	0.118051	6.32232e-05	0.00033795	0.00184968	0.00345185	14.1977	4.19365e-05	7.21392e-05	YEL073C
0.295724	-0.0441427	-0.251581	4.85662	-0.724946	-4.13167	0.000107766	0.000340417	0.477264	0.295946	0.000560754	0.00130549	14.1957	4.19762e-05	7.22615e-05	YKR087C
-0.367142	0.0654763	0.301665	-4.91105	0.875841	4.0352	9.53392e-05	0.000310501	0.391987	0.259532	0.000699395	0.00157163	14.1906	4.2072e-05	7.23835e-05	YBL058W
-0.3339	0.0274937	0.306407	-4.71647	0.388359	4.32812	0.000147889	0.000442677	0.702041	0.377077	0.000357779	0.000918064	14.1769	4.23363e-05	7.26772e-05	YGL119W
-0.169463	-0.11847	0.287934	-3.06245	-2.14092	5.20339	0.0063758	0.00968741	0.045376	0.0534331	4.95951e-05	0.000188758	14.1455	4.29473e-05	7.36573e-05	YMR089C
0.496538	-0.135152	-0.361385	5.05576	-1.37612	-3.67963	6.89215e-05	0.000234876	0.18469	0.153511	0.00157842	0.00304461	14.1306	4.3241e-05	7.41213e-05	YGR063C
-0.632193	0.0895133	0.54268	-4.82801	0.683606	4.1444	0.000114945	0.000358625	0.502425	0.305816	0.000544636	0.00127749	14.1164	4.3521e-05	7.45847e-05	YGL184C
0.172642	-0.273681	0.101037	3.25836	-5.16531	1.90692	0.0041098	0.00681819	5.39782e-05	0.000300497	0.0716701	0.0652935	14.1097	4.36546e-05	7.48761e-05	YLR291C
0.010312	-0.304178	0.293865	0.155806	-4.59588	4.44006	0.877819	0.397346	0.000194393	0.000793847	0.000277121	0.000752685	14.0845	4.41604e-05	7.56807e-05	YDL182W
-0.154329	0.861571	-0.707241	-0.87615	4.89127	-4.01512	0.391823	0.234921	9.96769e-05	0.000475674	0.000732325	0.00163327	14.0683	4.44904e-05	7.61421e-05	YAL061W
0.014511	0.490354	-0.504864	0.131657	4.44894	-4.58059	0.896631	0.402154	0.000271568	0.00103358	0.000201263	0.00057994	14.061	4.46391e-05	7.62608e-05	YDL123W
-0.287729	0.170654	0.117076	-5.18231	3.07366	2.10866	5.1974e-05	0.000185868	0.00621841	0.0115774	0.0483882	0.0482227	14.0465	4.49369e-05	7.67211e-05	YNR011C
-0.284131	0.28106	0.003072	-4.53587	4.48684	0.0490414	0.000222802	0.0006217	0.000249103	0.000967656	0.961395	0.420363	14.0321	4.52353e-05	7.71808e-05	YJL042W
-0.337427	0.667195	-0.329767	-2.63451	5.20921	-2.5747	0.0162788	0.0206716	4.89575e-05	0.000276766	0.0184999	0.0223969	14.0311	4.52548e-05	7.71928e-05	YJL142C
0.286416	-0.0130553	-0.273362	4.61257	-0.210249	-4.40234	0.000187163	0.000535604	0.835698	0.417299	0.000302018	0.000808163	14.0294	4.52903e-05	7.71928e-05	YKL069W
-0.177785	-0.26979	0.447575	-2.05466	-3.11796	5.1726	0.053837	0.0526839	0.00563272	0.0107394	5.31084e-05	0.000199646	14.0289	4.5301e-05	7.71928e-05	YOR295W
0.0971433	-0.293928	0.196785	1.68858	-5.10918	3.42059	0.107543	0.0893657	6.11699e-05	0.000329597	0.00284754	0.00487417	14.0138	4.56151e-05	7.76509e-05	YBR261C
-0.532321	0.172197	0.360124	-5.09915	1.64949	3.44965	6.25539e-05	0.000216298	0.11538	0.1079	0.00266573	0.0046192	14.0024	4.58554e-05	7.80551e-05	YEL041W
-1.04351	0.682529	0.360984	-5.12288	3.35072	1.77217	5.93284e-05	0.000207198	0.00333608	0.00713309	0.0923023	0.0798235	13.9988	4.59316e-05	7.80551e-05	YGR204C-A
0.465105	0.00359533	-0.468701	4.48829	0.0346951	-4.52299	0.000248286	0.000680596	0.972683	0.454016	0.000229428	0.000651091	13.9959	4.59931e-05	7.81718e-05	YAR061W
-0.0598267	1.2205	-1.16067	-0.226131	4.61321	-4.38708	0.823499	0.382724	0.000186891	0.00077286	0.000312717	0.000832042	13.9876	4.61683e-05	7.84581e-05	YDR119W-A
0.304585	-0.00713867	-0.297447	4.5537	-0.106727	-4.44699	0.000213948	0.000598785	0.916118	0.438008	0.000272782	0.000743369	13.9683	4.65807e-05	7.90835e-05	YGR036C
-0.562697	0.223306	0.339391	-5.15973	2.04764	3.11209	5.46519e-05	0.000193786	0.0545849	0.0616622	0.00570705	0.00856468	13.9605	4.67472e-05	7.91993e-05	YKL103C
-0.332372	0.018421	0.313953	-4.61596	0.255829	4.36015	0.000185729	0.00053259	0.800815	0.406936	0.000332545	0.000870793	13.9201	4.76269e-05	8.06707e-05	YOR026W
-0.488817	0.289971	0.198848	-5.15768	3.05958	2.09811	5.49025e-05	0.000194249	0.00641662	0.0118512	0.0494116	0.0489995	13.9136	4.77684e-05	8.09545e-05	YIR038C
0.224961	0.095583	-0.320545	3.54474	1.50611	-5.05087	0.00214722	0.00399759	0.148381	0.12997	6.96783e-05	0.000248127	13.9068	4.79194e-05	8.10688e-05	YDR041W
-0.659978	0.337733	0.322245	-5.184	2.65283	2.53117	5.17792e-05	0.000185627	0.0156506	0.023523	0.0202931	0.0241316	13.8976	4.81237e-05	8.1352e-05	YOL127W
0.00784433	0.382289	-0.390134	0.0911491	4.4421	-4.53325	0.928322	0.410642	0.000275837	0.00104455	0.000224131	0.000637345	13.8882	4.83326e-05	8.16349e-05	YLR414C
-0.242567	0.401455	-0.158889	-3.10629	5.14099	-2.03471	0.00578158	0.00894976	5.69817e-05	0.000312569	0.0559857	0.0538111	13.8633	4.88914e-05	8.25929e-05	YOL048C
0.046287	0.636494	-0.68278	0.313939	4.31699	-4.63092	0.756967	0.363451	0.000366998	0.00130753	0.000179529	0.000528689	13.8501	4.91925e-05	8.30433e-05	YBR285W
-0.083804	0.505388	-0.421582	-0.800509	4.82755	-4.02702	0.43325	0.251829	0.000115065	0.000535192	0.000712621	0.00159438	13.8441	4.93294e-05	8.30995e-05	YOL016C
0.08764	-0.372013	0.284373	1.166	-4.94942	3.78342	0.257954	0.173253	8.74642e-05	0.000429797	0.00124493	0.00251341	13.8467	4.92686e-05	8.30995e-05	YOL064C
0.44725	-0.0316747	-0.415576	4.63362	-0.328157	-4.30547	0.000178432	0.00051483	0.746359	0.391249	0.000376783	0.000955495	13.8276	4.97067e-05	8.36605e-05	YKL201C
-0.405299	0.535422	-0.130123	-3.75305	4.95799	-1.20493	0.00133451	0.00272857	8.57986e-05	0.000425542	0.242933	0.1638	13.8289	4.96771e-05	8.36605e-05	YLR149C
-0.0696893	-0.250763	0.320452	-1.06861	-3.84516	4.91377	0.298554	0.192529	0.00108088	0.00303019	9.47594e-05	0.000316264	13.8128	5.00488e-05	8.41087e-05	YGL099W
-0.125769	-0.226136	0.351906	-1.82232	-3.27657	5.09889	0.0840863	0.0740981	0.00394448	0.00818964	6.25899e-05	0.000229235	13.807	5.01834e-05	8.43882e-05	YDL143W
0.453348	-0.220589	-0.232757	5.16193	-2.51168	-2.65023	5.43853e-05	0.000192968	0.021148	0.0295987	0.0157381	0.0196193	13.7803	5.08108e-05	8.53392e-05	YMR244W
0.086693	-0.383642	0.29695	1.1121	-4.92138	3.80929	0.279882	0.183575	9.31519e-05	0.000451096	0.00117339	0.00240347	13.7767	5.08954e-05	8.54496e-05	YBR172C
-0.174617	-0.188329	0.362948	-2.48149	-2.67635	5.15786	0.0225392	0.0267295	0.0148777	0.0226711	5.48799e-05	0.00020559	13.7618	5.12487e-05	8.57798e-05	YBL097W
-0.18661	-0.122535	0.309146	-3.09226	-2.0305	5.12277	0.00596555	0.00915701	0.0564496	0.0632701	5.93428e-05	0.000218861	13.763	5.1219e-05	8.57798e-05	YGL048C
0.322393	-0.200659	-0.121734	5.10903	-3.17988	-1.92914	6.11892e-05	0.000211984	0.00490307	0.00965392	0.0686906	0.0633732	13.7657	5.11562e-05	8.57798e-05	YPL204W
-0.364157	-0.00955333	0.37371	-4.40826	-0.115647	4.52391	0.000297963	0.000791776	0.909138	0.436635	0.000228947	0.000650382	13.7575	5.13496e-05	8.58319e-05	YKL184W
0.262614	-0.376087	0.113473	3.51145	-5.02871	1.51726	0.00231635	0.00424827	7.32213e-05	0.000374781	0.145563	0.112218	13.7604	5.12816e-05	8.58319e-05	YPR110C
-0.185129	0.546724	-0.361596	-1.71661	5.06948	-3.35289	0.102209	0.08598	6.68395e-05	0.00034725	0.00331974	0.00553096	13.7494	5.15453e-05	8.61087e-05	YIL049W
0.151682	-0.514992	0.36331	1.47687	-5.01428	3.53741	0.155993	0.119187	7.56247e-05	0.000383666	0.00218337	0.00395773	13.7319	5.19665e-05	8.68281e-05	YCR022C
-0.104618	0.333301	-0.228684	-1.58148	5.03843	-3.45697	0.130169	0.103733	7.16448e-05	0.000367213	0.0026218	0.00457402	13.7319	5.19659e-05	8.68281e-05	YLR219W
0.102762	-0.288297	0.185535	1.81088	-5.0804	3.26952	0.0859017	0.0752714	6.52277e-05	0.000341963	0.00400764	0.00643315	13.7119	5.24514e-05	8.76043e-05	YFL057C
0.224852	-0.218472	-0.00638	4.5212	-4.39291	-0.128286	0.000230363	0.000637712	0.000308582	0.00114408	0.899263	0.405301	13.7036	5.26556e-05	8.78792e-05	YML016C
-0.647357	0.116123	0.531234	-4.82704	0.865872	3.96116	0.000115196	0.000358625	0.397295	0.262049	0.000828671	0.0018024	13.6986	5.27787e-05	8.7987e-05	YOL024W
-0.31216	-0.149684	0.461845	-3.40887	-1.63458	5.04346	0.00292428	0.00512801	0.118494	0.109645	7.08431e-05	0.000250773	13.6944	5.28815e-05	8.80948e-05	YJL109C
-0.290303	0.299182	-0.008878	-4.38631	4.52046	-0.134141	0.000313269	0.000823248	0.000230749	0.000908076	0.894693	0.404179	13.6818	5.31925e-05	8.85352e-05	YEL020C
0.419888	-0.610818	0.19093	3.45568	-5.02703	1.57135	0.00262952	0.00470246	7.34969e-05	0.000375678	0.132503	0.104793	13.6782	5.32819e-05	8.86424e-05	YHL047C
0.352082	-0.021381	-0.330701	4.58572	-0.278478	-4.30723	0.000198932	0.000564665	0.783635	0.401901	0.000375267	0.000953248	13.6702	5.34814e-05	8.89156e-05	YGR191W
0.133831	0.202731	-0.336561	2.02963	3.07454	-5.10417	0.0565453	0.054703	0.00620615	0.0115618	6.18571e-05	0.000227264	13.6586	5.37736e-05	8.92951e-05	YDR326C
-0.410522	0.595913	-0.185391	-3.45928	5.02148	-1.5622	0.00260808	0.00467308	7.44161e-05	0.000378991	0.134641	0.105963	13.6577	5.3795e-05	8.92951e-05	YPL223C
-0.0648597	0.470175	-0.405315	-0.653997	4.7409	-4.08689	0.520903	0.285186	0.000139936	0.000614114	0.000621298	0.00142633	13.6523	5.39317e-05	8.94015e-05	YML083C
-0.36396	0.112158	0.251802	-5.01404	1.54513	3.46891	7.56661e-05	0.000255259	0.138705	0.124019	0.00255165	0.00447183	13.6367	5.43262e-05	8.99452e-05	YDR470C
0.103331	-0.405801	0.302469	1.25821	-4.94125	3.68303	0.223463	0.156054	8.90842e-05	0.000434747	0.0015662	0.00302727	13.6375	5.43045e-05	8.99452e-05	YJR111C
0.477462	-0.267235	-0.210228	5.12075	-2.86607	-2.25468	5.96113e-05	0.000207986	0.00984522	0.0165398	0.0360686	0.0382638	13.6225	5.4689e-05	9.05476e-05	YJL223C
0.369035	-0.0570803	-0.311954	4.76464	-0.73697	-4.02767	0.000132622	0.000402576	0.470088	0.292502	0.000711573	0.00159372	13.6042	5.51587e-05	9.13146e-05	YCR006C
-0.081552	0.27105	-0.189497	-1.50338	4.99671	-3.49331	0.149078	0.115257	7.86616e-05	0.000394882	0.00241391	0.00426167	13.5916	5.54852e-05	9.17499e-05	YNR047W
-0.318578	0.034234	0.284342	-4.6687	0.501693	4.16699	0.000164788	0.000485473	0.621611	0.35038	0.000517195	0.00122745	13.5853	5.56493e-05	9.17934e-05	YKR054C
-0.809511	0.625169	0.184344	-4.8901	3.77652	1.11358	9.99418e-05	0.000321373	0.00126476	0.00339965	0.279262	0.181298	13.5863	5.56225e-05	9.17934e-05	YMR105C
0.245565	0.349361	-0.594927	2.10371	2.99292	-5.09665	0.0488654	0.0488959	0.00744142	0.0132796	6.29046e-05	0.000230034	13.567	5.61301e-05	9.25576e-05	YBR169C
-0.050093	0.263999	-0.213905	-0.914785	4.82107	-3.90627	0.371697	0.226395	0.000116757	0.000538286	0.000939708	0.00199606	13.5599	5.63161e-05	9.28261e-05	YMR293C
-0.404754	0.247598	0.157156	-5.07596	3.1051	1.97088	6.5878e-05	0.000225749	0.00579702	0.0110108	0.0633893	0.0595359	13.5436	5.67476e-05	9.34237e-05	YGL016W
-0.198083	-0.120695	0.318777	-3.14811	-1.91819	5.06629	0.00526511	0.00830647	0.0701456	0.0743053	6.7318e-05	0.000241109	13.5319	5.70616e-05	9.40206e-05	YHR183W
0.329951	-0.063717	-0.266234	4.82017	-0.930824	-3.88933	0.000116996	0.000362615	0.36355	0.246393	0.000976883	0.00206256	13.5216	5.73395e-05	9.42876e-05	YDL067C
-0.41654	0.409074	0.00746533	-4.46737	4.3873	0.0800654	0.000260401	0.000710008	0.000312563	0.0011559	0.937017	0.414644	13.5163	5.74804e-05	9.45543e-05	YOR237W
0.355977	-0.120283	-0.235695	5.02168	-1.6968	-3.32488	7.43829e-05	0.000251178	0.105954	0.101415	0.0035368	0.00582019	13.4953	5.80518e-05	9.5415e-05	YLR082C
0.174925	-0.327888	0.152964	2.72328	-5.10465	2.38138	0.0134428	0.0177132	6.17912e-05	0.000331642	0.0277909	0.0308436	13.4931	5.81136e-05	9.5415e-05	YOR233W
-0.552291	0.594114	-0.0418213	-4.25249	4.57451	-0.322013	0.000425297	0.00105547	0.000204063	0.000822408	0.750937	0.362682	13.4823	5.84084e-05	9.58445e-05	YOL153C
-0.27776	0.479096	-0.201335	-2.94728	5.08364	-2.13635	0.00823258	0.0119445	6.47586e-05	0.000341963	0.0457925	0.0463087	13.4755	5.85954e-05	9.61094e-05	YFL030W
-0.176738	-0.088775	0.265513	-3.3338	-1.67455	5.00835	0.00346623	0.0059009	0.110301	0.104522	7.66357e-05	0.000266946	13.4439	5.94771e-05	9.75213e-05	YCR042C
-0.209598	-0.130821	0.34042	-3.1087	-1.94031	5.04903	0.00575048	0.0089164	0.0672349	0.0720331	6.99669e-05	0.00024888	13.4161	6.02615e-05	9.87026e-05	YCR092C
0.474616	-0.264296	-0.210321	5.08269	-2.83036	-2.25234	6.4896e-05	0.000222869	0.0106469	0.0176308	0.0362411	0.0384033	13.4148	6.02987e-05	9.87026e-05	YPR156C
-0.438666	0.254617	0.184049	-5.06963	2.94258	2.12703	6.68177e-05	0.000228552	0.00831849	0.0144842	0.0466511	0.0469406	13.4033	6.0629e-05	9.91285e-05	YML004C
0.031884	0.369904	-0.401789	0.363351	4.21543	-4.5788	0.720329	0.35227	0.000462919	0.00157651	0.000202084	0.000581709	13.3975	6.07962e-05	9.93904e-05	YKL141W
0.440478	0.0527593	-0.493237	4.13824	0.495668	-4.63391	0.000552379	0.0013146	0.625778	0.351873	0.000178315	0.000526519	13.3894	6.10295e-05	9.9652e-05	YHL044W
-0.231112	0.312219	-0.0811073	-3.62879	4.90229	-1.2735	0.00177273	0.00342402	9.72374e-05	0.000465962	0.218105	0.151964	13.382	6.12432e-05	9.99132e-05	YCL075W
0.243229	-0.183189	-0.0600393	4.88255	-3.67732	-1.20522	0.000101654	0.000325891	0.00158677	0.00404832	0.242823	0.163765	13.3793	6.13217e-05	0.000100011	YLL067C
0.800178	-0.545356	-0.254822	4.97501	-3.39069	-1.58433	8.25828e-05	0.000274556	0.00304736	0.00664797	0.12952	0.103086	13.3597	6.18944e-05	0.000100858	YGR039W
-0.257524	0.493674	-0.236149	-2.65074	5.08148	-2.43073	0.0157209	0.0200725	6.50712e-05	0.000341963	0.025074	0.0285956	13.3592	6.19076e-05	0.000100858	YOR351C
0.160456	0.245648	-0.406104	1.99362	3.0521	-5.04571	0.0606567	0.0577424	0.00652444	0.0119988	7.04871e-05	0.000250341	13.3567	6.19808e-05	0.000100955	YER141W
0.0986973	-0.360426	0.261727	1.34561	-4.91396	3.56832	0.194168	0.140493	9.47195e-05	0.000456156	0.0020349	0.00373554	13.3365	6.25764e-05	0.000101799	YDR165W
-0.350014	-0.260012	0.610026	-2.90348	-2.15688	5.06036	0.00906791	0.0129023	0.0439496	0.0522559	6.8216e-05	0.000243713	13.3362	6.25866e-05	0.000101799	YMR276W
0.42089	0.0832647	-0.504154	3.95162	0.78175	-4.73336	0.000846987	0.001868	0.443935	0.281542	0.000142341	0.000440387	13.3161	6.31874e-05	0.000102707	YOL114C
-0.141165	-0.239032	0.380196	-1.86319	-3.1549	5.01809	0.0778697	0.0697652	0.00518557	0.0100718	7.49831e-05	0.000263328	13.3074	6.34474e-05	0.000102965	YLR186W
0.498142	-0.232041	-0.266103	5.06872	-2.36108	-2.70766	6.69526e-05	0.000228957	0.0289864	0.0382237	0.0139051	0.0177916	13.3047	6.35312e-05	0.00010306	YBL108C-A
-0.734078	0.417442	0.316635	-5.05629	2.87532	2.18097	6.88395e-05	0.000234821	0.00964736	0.0162335	0.0418749	0.0430277	13.3019	6.36137e-05	0.000103155	YDL244W
-0.318659	0.111063	0.207596	-4.99366	1.74045	3.25322	7.9201e-05	0.000266419	0.0978495	0.0955806	0.00415769	0.00663989	13.2878	6.40416e-05	0.000103737	YGR217W
-0.0322247	-0.240613	0.272839	-0.547785	-4.09017	4.63797	0.590178	0.30897	0.000616659	0.00195253	0.000176681	0.00052249	13.2847	6.41358e-05	0.000103831	YKR048C
-0.41804	0.175703	0.242337	-5.04463	2.12027	2.92436	7.06581e-05	0.000240135	0.0472836	0.0551099	0.00866001	0.0120509	13.2694	6.46062e-05	0.000104573	YKL210W
0.126833	0.212341	-0.339174	1.8743	3.13792	-5.0122	0.0762522	0.06863	0.00538672	0.0103755	7.59774e-05	0.000265513	13.2646	6.4755e-05	0.000104829	YHR158C
0.0225457	0.252344	-0.274891	0.374056	4.18665	-4.56072	0.712479	0.350016	0.000494438	0.00165391	0.000210559	0.000603634	13.2599	6.48996e-05	0.000104922	YMR298W
-0.292857	0.198383	0.094476	-4.96045	3.36023	1.60025	8.53251e-05	0.00028219	0.00326502	0.00701866	0.125938	0.100992	13.2564	6.50072e-05	0.000104948	YDL089W
0.287994	0.0972423	-0.385236	3.63935	1.22884	-4.86818	0.00173053	0.00336575	0.234042	0.181293	0.000104996	0.000343754	13.255	6.50494e-05	0.000104948	YPR085C
0.047216	0.229604	-0.276819	0.806919	3.92393	-4.73082	0.429637	0.2503	0.000902462	0.00262248	0.000143162	0.000442441	13.2464	6.53178e-05	0.000105364	YBL005W
-0.0279713	0.287757	-0.259786	-0.445855	4.58677	-4.14092	0.66071	0.33308	0.000198459	0.000806864	0.000548995	0.0012845	13.231	6.57981e-05	0.000106033	YDL027C
-0.28658	-0.00660133	0.293182	-4.33015	-0.0997446	4.42991	0.000356123	0.0009144	0.921585	0.439331	0.000283609	0.000768407	13.231	6.57994e-05	0.000106033	YDR093W
-0.371924	0.0986507	0.273272	-4.88006	1.29441	3.58564	0.000102225	0.000326227	0.210941	0.168224	0.00195615	0.00362143	13.2182	6.62015e-05	0.000106609	YJL121C
-0.252105	0.132755	0.11935	-5.04757	2.65798	2.38959	7.01951e-05	0.000239017	0.0154781	0.0233688	0.0273207	0.0304994	13.1857	6.72376e-05	0.000108149	YKL005C
-0.331757	0.14074	0.191017	-5.03064	2.13413	2.89651	7.29045e-05	0.000247008	0.0459953	0.0539425	0.00920807	0.0127317	13.1853	6.72518e-05	0.000108171	YLR187W
-0.00439833	-0.279542	0.28394	-0.0682638	-4.3386	4.40686	0.946284	0.414672	0.000349322	0.00125315	0.00029892	0.000802205	13.1842	6.72872e-05	0.000108171	YMR277W
-0.690495	0.325064	0.36543	-5.04516	2.37511	2.67005	7.05744e-05	0.000240086	0.0281553	0.0374227	0.0150811	0.0189769	13.1757	6.756e-05	0.000108583	YKR076W
-0.365052	0.250166	0.114888	-4.93331	3.38074	1.55259	9.06876e-05	0.000297571	0.00311684	0.00677498	0.136917	0.10729	13.1597	6.80796e-05	0.000109315	YBR221C
0.048251	0.247604	-0.295856	0.766736	3.93458	-4.70132	0.452602	0.25936	0.000880714	0.00257419	0.000153049	0.000464824	13.1575	6.81506e-05	0.000109405	YDL086W
-0.388445	0.509925	-0.121481	-3.67755	4.82765	-1.15011	0.00158593	0.00313905	0.000115037	0.000535192	0.264281	0.173893	13.1514	6.83508e-05	0.000109656	YMR196W
-0.00843333	-0.261115	0.269548	-0.138722	-4.29515	4.43387	0.89112	0.401225	0.000385774	0.00136473	0.000281059	0.000762232	13.1422	6.86514e-05	0.000110066	YBR249C
-0.334352	-0.047547	0.3819	-4.04672	-0.575469	4.62219	0.000681188	0.0015782	0.571685	0.330909	0.00018312	0.000536455	13.1232	6.92789e-05	0.000110956	YOR101W
0.555655	-0.379775	-0.175879	4.92683	-3.36736	-1.55946	9.20185e-05	0.000300448	0.00321276	0.00694837	0.135286	0.106247	13.1139	6.95901e-05	0.000111364	YPL165C
0.10169	-0.477372	0.375683	1.01816	-4.77967	3.76151	0.321311	0.20409	0.000128194	0.00057688	0.00130893	0.00262004	13.1092	6.9748e-05	0.000111453	YOL165C
0.0838457	-0.372276	0.288429	1.08094	-4.79937	3.71842	0.293171	0.189889	0.000122616	0.000558616	0.0014445	0.0028332	13.1085	6.97695e-05	0.000111541	YDR359C
-0.261521	0.160669	0.100854	-4.99079	3.06615	1.92466	7.97125e-05	0.000267458	0.00632342	0.0117078	0.0692827	0.0636962	13.1032	6.99488e-05	0.000111629	YDL046W
0.310942	-0.239108	-0.0718333	4.8075	-3.69687	-1.11062	0.000120389	0.000371798	0.00151743	0.00390498	0.280504	0.181894	13.1028	6.99623e-05	0.000111717	YJL072C
-0.487078	0.220685	0.266392	-5.02441	2.27646	2.74794	7.39291e-05	0.000250093	0.0345005	0.0434826	0.0127427	0.0166142	13.091	7.036e-05	0.000112284	YCL038C
0.388337	-0.119268	-0.269068	4.90787	-1.50733	-3.40053	9.60241e-05	0.000312055	0.148071	0.129846	0.00298012	0.00504887	13.0719	7.10073e-05	0.000113096	YDR322C-A
-0.340438	0.209022	0.131417	-4.98515	3.06078	1.92438	8.07262e-05	0.000269843	0.0063995	0.0118268	0.069319	0.0637088	13.0721	7.10011e-05	0.000113096	YLR422W
-0.281515	0.375953	-0.094437	-3.61802	4.83173	-1.2137	0.00181685	0.00349718	0.000113985	0.00053426	0.239643	0.162439	13.0671	7.11735e-05	0.000113342	YHR202W
-0.0740263	-0.238433	0.31246	-1.13927	-3.66951	4.80879	0.268662	0.178391	0.00161535	0.00410386	0.000120037	0.00038275	13.0598	7.14222e-05	0.000113588	YLR405W
0.056627	-0.258333	0.201707	1.04789	-4.78047	3.73261	0.307757	0.197493	0.000127962	0.000576698	0.0013984	0.00276762	13.0583	7.14737e-05	0.000113674	YJL197W
-0.238824	0.0857377	0.153086	-4.95876	1.78019	3.17856	8.56491e-05	0.000282848	0.0909422	0.090128	0.0049176	0.00758639	13.0508	7.17307e-05	0.00011392	YNL181W
-0.389428	-0.132376	0.521804	-3.60611	-1.2258	4.83191	0.00186692	0.00357145	0.235157	0.181729	0.000113937	0.000366206	13.0482	7.18229e-05	0.000114006	YFL023W
-0.319785	0.292605	0.02718	-4.52255	4.13815	0.384392	0.000229659	0.000636392	0.000552485	0.00180549	0.70493	0.348306	13.0039	7.33721e-05	0.000116472	YDL237W
0.309624	-0.376807	0.0671827	3.86188	-4.69984	0.837956	0.00104027	0.00220396	0.000153562	0.000666144	0.412408	0.241331	12.9968	7.36248e-05	0.000116715	YNL024C
-0.250898	-0.271749	0.522647	-2.40517	-2.60505	5.01022	0.0264487	0.0304497	0.017339	0.0253273	7.63152e-05	0.000266231	12.986	7.40097e-05	0.000117275	YGR128C
0.284435	-0.075587	-0.208847	4.83165	-1.28399	-3.54766	0.000114004	0.000357059	0.214488	0.170241	0.00213302	0.00388021	12.9535	7.51789e-05	0.000119025	YDL001W
-0.00491967	-0.264563	0.269482	-0.0798507	-4.2941	4.37394	0.937186	0.412998	0.000386704	0.00136642	0.000322239	0.000850138	12.9527	7.52087e-05	0.000119025	YGR056W
0.122257	-0.365763	0.243507	1.64291	-4.9152	3.2723	0.116745	0.0955097	9.44551e-05	0.000455922	0.00398266	0.00640401	12.949	7.53433e-05	0.000119108	YBR158W
-0.655474	0.6169	0.0385747	-4.4579	4.19555	0.262347	0.000266083	0.00072021	0.000484461	0.00162596	0.795859	0.375542	12.9414	7.56194e-05	0.000119507	YFR017C
-0.342788	0.452564	-0.109775	-3.62801	4.78986	-1.16184	0.0017759	0.00342778	0.000125279	0.00056808	0.2596	0.171987	12.9107	7.67549e-05	0.000121326	YGR129W
-0.226699	0.037443	0.189255	-4.66002	0.769679	3.89032	0.000168062	0.000492622	0.450895	0.284697	0.000974672	0.00205944	12.9064	7.69122e-05	0.000121407	YLR077W
-0.160621	0.280704	-0.120084	-2.84806	4.97734	-2.12928	0.010242	0.014254	8.21529e-05	0.000410391	0.0464424	0.0467641	12.8983	7.72159e-05	0.000121804	YPL099C
-1.24574	0.274138	0.971597	-4.75107	1.04553	3.70554	0.000136756	0.000413778	0.308818	0.220606	0.00148767	0.0028934	12.8906	7.75063e-05	0.0001222	YMR169C
-0.29034	0.00752	0.28282	-4.37951	0.113432	4.26608	0.000318167	0.000832212	0.91087	0.437049	0.000412285	0.00102338	12.8891	7.75629e-05	0.00012228	YPR108W
-0.360621	0.163623	0.196999	-4.98519	2.26191	2.7233	8.07194e-05	0.000269843	0.0355413	0.0444161	0.0134422	0.0172859	12.8864	7.76629e-05	0.00012236	YLR342W
-0.182643	0.305707	-0.123063	-2.96307	4.95956	-1.99649	0.00795012	0.0116129	8.54963e-05	0.000424754	0.0603197	0.0571262	12.8789	7.79453e-05	0.00012252	YDR497C
0.434766	-0.00989733	-0.424869	4.37133	-0.0995121	-4.27182	0.000324167	0.000844748	0.921768	0.439331	0.00040691	0.00101182	12.8803	7.78956e-05	0.00012252	YKL144C
0.195715	-0.31908	0.123365	3.03511	-4.94821	1.91312	0.0067759	0.0101195	8.77021e-05	0.000429797	0.0708276	0.0647426	12.8768	7.80271e-05	0.0001226	YOR201C
0.162212	0.446044	-0.608256	1.28427	3.53143	-4.8157	0.214391	0.15133	0.00221332	0.00520569	0.000118181	0.000378118	12.8611	7.86223e-05	0.000123465	YLR311C
0.113124	0.231994	-0.345118	1.60328	3.28801	-4.8913	0.125264	0.100828	0.00384397	0.00802939	9.96706e-05	0.00033026	12.8594	7.86878e-05	0.000123545	YBR024W
0.285335	0.524984	-0.81032	1.73061	3.18411	-4.91473	0.0996296	0.0843248	0.00485672	0.00958148	9.45557e-05	0.000315971	12.8531	7.89288e-05	0.000123781	YKL162C-A
5.1e-05	-0.227416	0.227366	0.000968324	-4.31788	4.31694	0.999237	0.428402	0.000366246	0.00130639	0.000367036	0.00093754	12.8504	7.90348e-05	0.000123859	YOR033C
-0.380209	0.212719	0.167489	-4.9703	2.78078	2.18951	8.34606e-05	0.00027689	0.0118642	0.0191927	0.0411606	0.0425267	12.8333	7.96934e-05	0.0001248	YDR129C
-0.175354	-0.137244	0.312597	-2.78785	-2.18196	4.96979	0.0116829	0.0158417	0.0417912	0.0503995	8.35563e-05	0.000287423	12.8337	7.96766e-05	0.0001248	YIL130W
0.297885	-0.348897	0.051013	3.93557	-4.60953	0.67397	0.000878705	0.00192582	0.000188458	0.000775081	0.508397	0.278846	12.8196	8.02275e-05	0.000125504	YLL038C
0.324498	-0.0106687	-0.313829	4.38069	-0.144026	-4.23665	0.000317315	0.000830888	0.886987	0.431321	0.000440985	0.0010784	12.8091	8.06383e-05	0.000126051	YLR141W
-0.292644	0.199947	0.0926973	-4.86715	3.32545	1.54171	0.00010524	0.000333945	0.00353228	0.00749405	0.139533	0.108732	12.7968	8.11236e-05	0.000126753	YDR436W
-0.187873	-0.223246	0.41112	-2.26816	-2.69522	4.96339	0.0350904	0.0378163	0.0142841	0.0219514	8.4764e-05	0.000290803	12.769	8.22303e-05	0.000128392	YDR398W
0.197684	-0.319523	0.121839	3.04567	-4.92283	1.87714	0.00661847	0.00995346	9.2849e-05	0.000449883	0.0758426	0.0679935	12.7655	8.23689e-05	0.000128463	YKL128C
0.242106	-0.214133	-0.0279743	4.54185	-4.01709	-0.524793	0.000219789	0.000613905	0.000729028	0.00223229	0.605759	0.314769	12.7679	8.22748e-05	0.000128463	YLL066C
0.28211	-0.0498587	-0.232252	4.65493	-0.822689	-3.83226	0.000170014	0.000496168	0.420827	0.272279	0.00111328	0.00231236	12.7646	8.24062e-05	0.000128463	YOL056W
-0.58298	0.07612	0.50686	-4.56834	0.596491	3.97185	0.000206944	0.000582679	0.557845	0.325969	0.000808632	0.00176428	12.7542	8.28264e-05	0.000129005	YNL109W
-0.155166	0.538392	-0.383226	-1.38956	4.82146	-3.43191	0.180632	0.133283	0.000116655	0.000538286	0.00277535	0.00476802	12.7384	8.34674e-05	0.000130015	YGR287C
0.156228	-0.374375	0.218147	2.06157	-4.94021	2.87864	0.0531098	0.0521591	8.92925e-05	0.000435017	0.0095772	0.0131451	12.7339	8.36509e-05	0.000130245	YBR208C
-0.059124	0.297739	-0.238614	-0.930252	4.68461	-3.75433	0.363838	0.223098	0.000158953	0.000681672	0.00133061	0.00265587	12.7214	8.41657e-05	0.000130941	YOL065C
-0.284195	-0.0571137	0.34131	-3.85343	-0.774409	4.62785	0.00106059	0.00224025	0.44816	0.283326	0.000180784	0.000531272	12.7075	8.47402e-05	0.000131554	YDL112W
0.202785	0.2159	-0.418685	2.40078	2.55605	-4.95683	0.0266916	0.0306337	0.0192492	0.0275167	8.60225e-05	0.000292797	12.7081	8.47169e-05	0.000131554	YDL246C
0.155028	-0.343254	0.188225	2.23467	-4.94786	2.71318	0.0375674	0.0398871	8.77715e-05	0.000429797	0.01374	0.0176044	12.6974	8.51591e-05	0.000132166	YCL010C
-0.160471	-0.232561	0.393032	-2.01199	-2.91585	4.92783	0.0585275	0.0563285	0.00882405	0.0152061	9.18115e-05	0.000307349	12.6965	8.51973e-05	0.000132166	YOR234C
-0.338339	-0.112856	0.451194	-3.56929	-1.19057	4.75984	0.00203042	0.00383451	0.248396	0.188836	0.000134069	0.000417551	12.6895	8.5491e-05	0.000132549	YOR377W
-0.302575	-0.0178753	0.32045	-4.161	-0.245821	4.4068	0.000524333	0.00125747	0.808441	0.409049	0.000298957	0.000802205	12.6829	8.57678e-05	0.000132931	YHR043C
0.25273	-0.481138	0.228409	2.60019	-4.95014	2.34996	0.0175203	0.0219827	8.73236e-05	0.000429797	0.029661	0.0325039	12.6805	8.58703e-05	0.000133004	YPL163C
0.328665	0.0417517	-0.370417	4.0085	0.509216	-4.51771	0.000743519	0.00168087	0.616428	0.348372	0.0002322	0.000656308	12.6632	8.66014e-05	0.000134004	YNR039C
0.133416	0.755056	-0.888474	0.688822	3.89832	-4.58715	0.499209	0.276665	0.000956976	0.00274121	0.000198286	0.000573123	12.655	8.69498e-05	0.000134218	YBR174C
-0.206876	0.579624	-0.372748	-1.74219	4.88124	-3.13906	0.0975391	0.0828991	0.000101954	0.000484126	0.00537295	0.00813272	12.6557	8.6919e-05	0.000134218	YOR220W
0.251187	-0.00833333	-0.242853	4.35503	-0.144482	-4.21055	0.00033645	0.00086947	0.886632	0.431287	0.000468116	0.00112908	12.6559	8.69109e-05	0.000134218	YOR299W
0.128989	-0.267763	0.138774	2.38248	-4.94571	2.56322	0.0277273	0.0316353	8.81962e-05	0.000431054	0.0189578	0.0228432	12.6526	8.70521e-05	0.000134444	YJL168C
0.252611	0.006986	-0.259597	4.22279	0.116782	-4.33957	0.000455196	0.00111557	0.908251	0.436413	0.000348542	0.000900111	12.6426	8.74792e-05	0.000134978	YOR064C
0.00869567	-0.308063	0.299367	0.122528	-4.34082	4.2183	0.90376	0.403669	0.000347552	0.00124859	0.000459896	0.00111262	12.6338	8.78611e-05	0.000135511	YIR033W
-0.480224	0.0582943	0.421929	-4.52871	0.54974	3.97897	0.00022646	0.000629397	0.588863	0.336952	0.000795555	0.00173709	12.631	8.79823e-05	0.000135581	YHR193C
-0.0785843	0.559389	-0.480806	-0.641205	4.56431	-3.92311	0.529001	0.288435	0.00020885	0.000837217	0.000904147	0.00192927	12.6279	8.81128e-05	0.000135651	YMR095C
0.0918663	0.34748	-0.439345	0.979378	3.70445	-4.68382	0.339624	0.212787	0.00149139	0.00386062	0.000159238	0.000480507	12.6229	8.83315e-05	0.000135791	YBR186W
0.30952	-0.112752	-0.196769	4.88153	-1.77824	-3.1033	0.000101888	0.000326188	0.0912708	0.0903862	0.00582037	0.0087034	12.6235	8.83066e-05	0.000135791	YKR006C
0.49476	-0.152884	-0.341877	4.81944	-1.48924	-3.33021	0.000117188	0.000362809	0.152736	0.13301	0.00349443	0.00576855	12.5936	8.96153e-05	0.000137705	YJL035C
0.291337	0.152313	-0.44365	3.1884	1.66693	-4.85533	0.00481017	0.00770602	0.111826	0.105485	0.000108079	0.000352208	12.5879	8.98647e-05	0.000138081	YPL189W
-0.222754	0.300753	-0.0780003	-3.51185	4.74156	-1.22972	0.00231421	0.00424713	0.000139727	0.000614092	0.233718	0.159481	12.5221	9.28336e-05	0.000142448	YDL110C
0.311037	-0.200445	-0.110592	4.85334	-3.12769	-1.72564	0.000108566	0.000342557	0.0055114	0.0105683	0.100537	0.0851131	12.5178	9.30321e-05	0.000142491	YER175C
0.220832	0.067737	-0.288568	3.60034	1.10435	-4.70468	0.00189162	0.00361376	0.283145	0.206495	0.000151888	0.000462296	12.5181	9.30175e-05	0.000142491	YNL038W
0.308558	0.228314	-0.536871	2.81779	2.085	-4.90277	0.0109437	0.0150436	0.0507112	0.0582035	9.71315e-05	0.000322788	12.5209	9.28869e-05	0.000142491	YPR066W
0.677106	-0.571802	-0.105305	4.57164	-3.86065	-0.710993	0.0002054	0.000578914	0.0010432	0.00294064	0.485672	0.270871	12.516	9.31142e-05	0.000142557	YOR318C
0.208308	-0.381439	0.17313	2.68266	-4.91229	2.22962	0.0146767	0.019008	9.50745e-05	0.000457351	0.0379541	0.0399327	12.512	9.32972e-05	0.000142775	YKL110C
-0.256326	0.268486	-0.012159	-4.1571	4.35431	-0.197195	0.000529035	0.00126658	0.000337004	0.00121943	0.845756	0.390889	12.5058	9.3585e-05	0.000143147	YDR107C
0.329475	-0.113605	-0.21587	4.84002	-1.66886	-3.17114	0.000111873	0.000352198	0.111437	0.105267	0.00500015	0.00768424	12.5012	9.37981e-05	0.000143364	YKR093W
-0.210153	0.00979367	0.200359	-4.35567	0.202985	4.15267	0.000335964	0.000869017	0.841291	0.418772	0.000534426	0.00125984	12.4979	9.39479e-05	0.000143429	YGL013C
-0.554472	0.544545	0.00992667	-4.29501	4.21812	0.0768933	0.000385896	0.000977396	0.000460081	0.00156862	0.939507	0.414919	12.4938	9.41425e-05	0.000143647	YKR009C
-0.120608	-0.252288	0.372895	-1.5576	-3.25819	4.81578	0.135726	0.106883	0.00411136	0.00846028	0.00011816	0.000378118	12.4897	9.43345e-05	0.000143864	YPR041W
-0.245318	0.141707	0.103611	-4.89501	2.8276	2.06742	9.88417e-05	0.000318889	0.0107115	0.0177148	0.0525012	0.0513035	12.4886	9.43818e-05	0.000143928	YDL103C
0.481071	-0.120466	-0.360606	4.72159	-1.18234	-3.53926	0.000146184	0.000439454	0.251565	0.190573	0.00217422	0.00394493	12.4842	9.45915e-05	0.000143969	YIL102C-A
-0.261793	0.395392	-0.133598	-3.19791	4.82987	-1.63196	0.00470856	0.00758534	0.000114464	0.00053426	0.11905	0.0967655	12.4841	9.45941e-05	0.000143969	YMR034C
-0.2637	0.115114	0.148585	-4.90055	2.13925	2.76129	9.76178e-05	0.00031652	0.0455274	0.0535189	0.0123785	0.0161844	12.4838	9.46105e-05	0.000143969	YMR231W
-0.012701	-0.408953	0.421652	-0.130071	-4.18808	4.31814	0.897869	0.402449	0.000492817	0.00165033	0.000366033	0.000935828	12.4792	9.48252e-05	0.000144185	YML113W
0.012794	0.317886	-0.330681	0.167573	4.1636	-4.33119	0.868679	0.394869	0.000521223	0.00172817	0.000355283	0.000913326	12.4514	9.61379e-05	0.000146073	YKL067W
0.480471	-0.602186	0.121714	3.70101	-4.63856	0.937551	0.00150315	0.00300067	0.000176442	0.000736418	0.360168	0.219246	12.4411	9.66334e-05	0.000146744	YEL057C
-0.501772	0.443076	0.0586977	-4.48507	3.96042	0.524667	0.000250109	0.000684253	0.00083009	0.00247091	0.605845	0.314769	12.4353	9.69094e-05	0.00014711	YIL046W-A
-0.0190523	0.260586	-0.241532	-0.321563	4.39814	-4.07656	0.751272	0.361585	0.000304922	0.00113331	0.000636179	0.00145224	12.4317	9.70863e-05	0.000147324	YIL105C
0.144605	0.227322	-0.371926	1.8898	2.9708	-4.86059	0.0740437	0.0672385	0.00781529	0.0137915	0.000106807	0.000348871	12.4168	9.78056e-05	0.000148295	YGR206W
-0.361452	0.067486	0.293968	-4.60782	0.860317	3.74752	0.000189192	0.000540306	0.400274	0.262853	0.0013515	0.00268804	12.4147	9.791e-05	0.000148357	YOR155C
-0.305207	0.195078	0.110128	-4.83361	3.08949	1.74412	0.000113502	0.000356124	0.00600264	0.0112945	0.0971938	0.0828562	12.3921	9.9014e-05	0.000149932	YOR349W
-0.089244	-0.153201	0.242446	-1.77994	-3.05553	4.8355	0.0909848	0.0789346	0.00647474	0.0119366	0.000113019	0.000363671	12.37	0.000100109	0.00015152	YCL011C
-0.0289517	-0.307493	0.336445	-0.37968	-4.03255	4.41223	0.708367	0.348793	0.000703655	0.0021727	0.00029528	0.000794669	12.3655	0.000100336	0.000151771	YLR376C
-0.250706	-0.006248	0.256954	-4.18007	-0.104174	4.28423	0.000501941	0.00120999	0.918116	0.438247	0.000395527	0.000991407	12.3534	0.000100941	0.000152594	YNL212W
0.00207733	-0.562188	0.560111	0.0156639	-4.23912	4.22345	0.987665	0.42533	0.000438506	0.00150529	0.000454501	0.00110286	12.3429	0.000101471	0.000153302	YNL300W
-0.0832813	0.307972	-0.224691	-1.27689	4.72189	-3.44501	0.216933	0.152577	0.000146086	0.000636465	0.002694	0.00465034	12.3384	0.000101702	0.000153558	YJR091C
-0.13935	0.318301	-0.17895	-2.13294	4.87203	-2.73907	0.0461046	0.0469532	0.00010409	0.000493491	0.0129904	0.0168434	12.3363	0.000101809	0.000153626	YKL019W
0.34408	-0.139473	-0.204607	4.85253	-1.96698	-2.88555	0.000108762	0.000342789	0.0638682	0.0693641	0.00943275	0.0129976	12.3204	0.000102619	0.000154755	YOR020C
0.188343	0.294137	-0.48248	1.89	2.95162	-4.84162	0.0740157	0.0672385	0.00815399	0.014297	0.00011147	0.000360336	12.3145	0.000102921	0.000155116	YFL060C
-0.32256	0.103952	0.218609	-4.78033	1.54057	3.23977	0.000128005	0.000391106	0.13981	0.124684	0.00428547	0.00680148	12.3129	0.000103	0.000155141	YBR182C
0.229636	-0.00149433	-0.228143	4.23586	-0.0275645	-4.20832	0.000441784	0.00108841	0.978295	0.454926	0.000470513	0.00113292	12.2896	0.00010421	0.000156869	YCL001W
0.30935	-0.029372	-0.279979	4.41528	-0.41922	-3.99607	0.000293233	0.000782861	0.679728	0.370092	0.00076498	0.00169001	12.2847	0.000104466	0.000157159	YMR059W
-0.331652	0.125553	0.206098	-4.82624	1.82707	2.99917	0.000115404	0.000358873	0.0833421	0.0843935	0.00733899	0.0104824	12.2801	0.000104704	0.000157422	YBL032W
0.143966	0.21132	-0.355285	1.96291	2.88125	-4.84415	0.0643717	0.0604158	0.0095225	0.0161071	0.000110837	0.000358702	12.2783	0.000104802	0.000157475	YDR089W
0.133885	-0.477351	0.343465	1.32468	-4.72297	3.39828	0.200894	0.144093	0.000145729	0.000636043	0.00299532	0.00507157	12.2745	0.000104999	0.000157676	YOR310C
-0.0521613	-0.1646	0.21676	-1.12293	-3.5435	4.66642	0.27537	0.181724	0.0021533	0.00509236	0.000165641	0.000497692	12.2688	0.000105301	0.000158034	YOL090W
-0.254356	0.234156	0.020201	-4.38108	4.03315	0.347946	0.000317032	0.000830888	0.000702684	0.00217192	0.731682	0.357489	12.2648	0.000105513	0.000158257	YIL162W
0.322234	-0.103908	-0.218328	4.77046	-1.53828	-3.23219	0.000130891	0.000398185	0.140365	0.12491	0.00435923	0.00687972	12.2611	0.000105706	0.000158451	YOL077W-A
-0.120948	-0.160948	0.281895	-2.07965	-2.76743	4.84707	0.0512502	0.0507738	0.0122142	0.0195696	0.000110111	0.000356763	12.2291	0.000107419	0.000160922	YDL097C
-0.182784	0.284897	-0.102113	-3.0791	4.79925	-1.72014	0.00614342	0.00938529	0.000122651	0.000558616	0.101552	0.0858169	12.2273	0.000107514	0.000160967	YKL193C
0.231372	-0.385445	0.154072	2.89951	-4.83032	1.9308	0.00914741	0.0129824	0.000114346	0.00053426	0.0684721	0.0632197	12.2255	0.000107613	0.000161019	YLR023C
-0.355519	0.277841	0.0776793	-4.62362	3.6134	1.01024	0.000182526	0.000524033	0.00183611	0.00452545	0.324994	0.203835	12.2213	0.000107838	0.000161259	YLL015W
-0.165281	-0.120963	0.286244	-2.79445	-2.04514	4.8396	0.0115161	0.0156534	0.0548525	0.0618121	0.000111981	0.000361157	12.2069	0.000108623	0.000162335	YOR236W
0.450442	-0.280638	-0.169803	4.80804	-2.99555	-1.81249	0.000120242	0.000371798	0.00739824	0.0132308	0.0856444	0.0753399	12.1939	0.000109333	0.000163298	YLR022C
0.0116837	0.438384	-0.450068	0.110559	4.1483	-4.25887	0.913118	0.406616	0.000539794	0.00177797	0.000419137	0.00103617	12.188	0.000109656	0.000163682	YLR251W
-0.264802	-0.0728853	0.337688	-3.61565	-0.995187	4.61084	0.00182672	0.00350653	0.332074	0.231149	0.000187899	0.000547603	12.1758	0.000110332	0.000164593	YBR294W
-0.227471	0.381794	-0.154323	-2.87338	4.82275	-1.94938	0.00968861	0.0136087	0.000116317	0.000537905	0.0660726	0.0615702	12.1731	0.000110483	0.000164621	YBR004C
0.409685	-0.0467603	-0.362924	4.43215	-0.505874	-3.92627	0.000282165	0.000754978	0.618728	0.349126	0.000897631	0.00191682	12.1732	0.000110479	0.000164621	YLR011W
0.282543	-0.482776	0.200234	2.82501	-4.82704	2.00205	0.0107724	0.0148591	0.000115197	0.000535192	0.0596716	0.0566376	12.1641	0.000110985	0.000165171	YCR046C
0.145039	0.152404	-0.297441	2.36501	2.4851	-4.85009	0.0287513	0.0324859	0.0223686	0.0309901	0.000109363	0.000354748	12.1652	0.000110923	0.000165171	YDL199C
-0.28352	0.0296113	0.25391	-4.41056	0.460646	3.94992	0.000296409	0.000789179	0.650249	0.360183	0.000850293	0.00184373	12.1565	0.000111411	0.000165706	YPR019W
-0.298809	-0.153477	0.452286	-3.14851	-1.61717	4.76568	0.00526039	0.00830371	0.122221	0.112489	0.000132312	0.000414373	12.1472	0.000111935	0.000166386	YHR056W-A
-0.244745	-0.161794	0.40654	-2.89598	-1.91444	4.81043	0.00921884	0.0130639	0.070649	0.0747072	0.000119594	0.00038177	12.1306	0.000112873	0.000167604	YLR336C
0.383334	-0.324649	-0.058686	4.49631	-3.80797	-0.688356	0.000243793	0.000669591	0.00117694	0.00323186	0.499496	0.275713	12.1303	0.000112889	0.000167604	YMR009W
0.343486	-0.153259	-0.190227	4.83146	-2.15573	-2.67573	0.000114055	0.000357059	0.0440511	0.0523352	0.0148977	0.0187797	12.116	0.000113708	0.000168519	YBR065C
-0.519054	0.281796	0.237257	-4.83531	2.6251	2.2102	0.000113068	0.000355161	0.0166106	0.0245426	0.0394772	0.0411808	12.1183	0.000113576	0.000168519	YDR273W
-0.270109	0.0606723	0.209436	-4.61329	1.03624	3.57702	0.000186858	0.000535279	0.313017	0.222672	0.00199495	0.00368138	12.1166	0.000113675	0.000168519	YJL178C
0.325794	-0.305399	-0.020394	4.32072	-4.05024	-0.270468	0.000363878	0.000929197	0.000675714	0.00210368	0.789698	0.373397	12.1148	0.000113776	0.00016852	YDR047W
-0.469673	0.124399	0.345274	-4.66626	1.23592	3.43034	0.000165702	0.000487143	0.231459	0.179823	0.00278527	0.00477921	12.0881	0.000115323	0.00017071	YDR012W
-0.366562	0.147985	0.218577	-4.80418	1.9395	2.86468	0.000121292	0.00037386	0.067339	0.072119	0.00987537	0.0134624	12.081	0.000115734	0.000171216	YJR065C
0.0641607	0.309997	-0.374159	0.774915	3.74406	-4.51899	0.447868	0.257491	0.00136224	0.00358484	0.000231523	0.000655053	12.0781	0.000115904	0.000171366	YDL128W
0.0924967	0.447828	-0.540325	0.7729	3.74204	-4.51495	0.449031	0.257948	0.00136854	0.00359828	0.000233666	0.000657807	12.0592	0.000117017	0.000172909	YNR064C
-0.329858	-0.0255213	0.35538	-4.01799	-0.310874	4.32888	0.000727522	0.00165406	0.75926	0.395395	0.000357164	0.000917323	12.0575	0.000117119	0.000172957	YER096W
-0.21745	0.272374	-0.0549247	-3.64107	4.56074	-0.919683	0.00172373	0.00335951	0.000210549	0.000841786	0.369197	0.22294	12.0312	0.000118693	0.000175178	YJR010C-A
-0.20225	-0.0736437	0.275895	-3.41309	-1.24278	4.65588	0.00289645	0.00509837	0.228975	0.1784	0.000169648	0.000506485	12.0199	0.000119375	0.00017608	YLR362W
0.302461	0.0219093	-0.324371	4.02093	0.291264	-4.3122	0.000722641	0.00164966	0.773986	0.399199	0.000371037	0.000945185	12.0119	0.000119858	0.000176688	YDL107W
0.387527	-0.414541	0.027014	4.02576	-4.30639	0.28063	0.000714684	0.00163589	0.000375994	0.00133641	0.782008	0.371581	12.006	0.00012022	0.000177012	YNR069C
-0.375943	0.274299	0.101642	-4.6579	3.39854	1.25934	0.000168872	0.000494382	0.00299357	0.0065687	0.223065	0.154402	12.0065	0.000120187	0.000177012	YPL206C
-0.0516527	0.272521	-0.220868	-0.859516	4.53483	-3.67531	0.400704	0.238578	0.00022333	0.000883499	0.00159409	0.00306643	11.9994	0.000120624	0.000177502	YAR019C
-0.21622	-0.103196	0.319417	-3.19461	-1.52471	4.71934	0.00474359	0.00762554	0.143702	0.127217	0.000146932	0.000450135	11.9963	0.000120812	0.000177674	YEL071W
-0.144444	-0.228609	0.373054	-1.84717	-2.92349	4.77068	0.0802564	0.0713522	0.00867661	0.014995	0.000130825	0.000410631	11.9673	0.000122607	0.000180207	YNL023C
0.171584	-0.326928	0.155344	2.52323	-4.80765	2.28442	0.0206373	0.0249389	0.000120348	0.000550626	0.0339435	0.0363245	11.9606	0.000123028	0.000180719	YBR154C
0.222208	0.110667	-0.332875	3.15185	1.56972	-4.72158	0.00522115	0.00826974	0.132881	0.119881	0.000146189	0.000448347	11.9581	0.000123184	0.000180842	YJL129C
-0.477981	0.7912	-0.313218	-2.88297	4.77216	-1.88919	0.00948657	0.0133823	0.000130389	0.00058327	0.07413	0.0667988	11.9452	0.000123997	0.000181754	YBR067C
-0.290846	-0.006434	0.297281	-4.11625	-0.0910585	4.20733	0.000580898	0.00137274	0.928393	0.441472	0.000471581	0.00113393	11.945	0.000124009	0.000181754	YGR184C
-0.224949	0.0391507	0.185797	-4.49815	0.782869	3.71526	0.000242769	0.00066809	0.443293	0.281228	0.00145498	0.00284753	11.9436	0.000124097	0.000181754	YHR117W
-0.031982	-0.292165	0.324146	-0.430255	-3.93051	4.36075	0.671821	0.33678	0.000888951	0.00259323	0.000332086	0.000870401	11.9438	0.000124079	0.000181754	YKR072C
0.207539	0.208636	-0.416174	2.39598	2.40864	-4.80461	0.0269597	0.0308854	0.0262577	0.0354643	0.000121176	0.000384637	11.9357	0.000124597	0.000182379	YLL020C
0.220344	0.559916	-0.780261	1.31531	3.34232	-4.65763	0.203962	0.145651	0.00340003	0.00724923	0.000168973	0.000506081	11.9247	0.000125295	0.000183293	YPL119C-A
-0.002483	-0.333771	0.336255	-0.0308116	-4.14178	4.17261	0.975739	0.421904	0.000547915	0.00180275	0.000510585	0.00121279	11.9148	0.00012593	0.000184113	YLL018C
0.263044	-0.334034	0.0709893	3.58678	-4.55477	0.967986	0.00195105	0.00370454	0.000213428	0.000850002	0.345137	0.212876	11.9086	0.00012633	0.00018459	YMR260C
0.444069	-0.429999	-0.014071	4.2181	-4.08446	-0.133657	0.0004601	0.00112169	0.000624774	0.00197229	0.895071	0.404189	11.8897	0.000127556	0.000186204	YDR210W
-0.123389	0.330436	-0.207047	-1.77178	4.74484	-2.97306	0.0923686	0.0798135	0.000138694	0.000612233	0.00777636	0.0110175	11.8892	0.000127584	0.000186204	YOL107W
-0.34267	0.3955	-0.0528297	-3.82239	4.4117	-0.589301	0.00113872	0.00238546	0.000295638	0.001107	0.562559	0.298793	11.8648	0.000129185	0.00018843	YOR356W
0.251313	0.060681	-0.311992	3.63734	0.878257	-4.51557	0.00173849	0.00337419	0.390707	0.258855	0.000233331	0.000657807	11.8548	0.000129848	0.000189151	YDR352W
0.404956	0.0283313	-0.433289	3.99953	0.279813	-4.27936	0.000758943	0.00171159	0.782626	0.401589	0.000399958	0.00099984	11.8533	0.000129952	0.000189151	YFL016C
0.277119	-0.308016	0.0308973	3.91118	-4.34725	0.436076	0.000929202	0.00201285	0.000342484	0.00123333	0.667665	0.336519	11.8528	0.000129983	0.000189151	YHR162W
-0.2415	0.0167363	0.224765	-4.28755	0.297134	3.99043	0.000392534	0.000992643	0.769568	0.398078	0.000774936	0.00170398	11.8558	0.000129781	0.000189151	YLL043W
0.00562	0.271288	-0.276908	0.0849921	4.10273	-4.18773	0.933151	0.412003	0.000599161	0.00190878	0.000493217	0.0011765	11.8496	0.000130199	0.000189186	YFR018C
-0.197856	0.255925	-0.0580697	-3.52988	4.56587	-1.036	0.00222114	0.00410052	0.000208109	0.000835359	0.313128	0.197849	11.8509	0.00013011	0.000189186	YMR139W
0.332427	-0.0974493	-0.234979	4.65616	-1.36493	-3.29125	0.00016954	0.000495301	0.188123	0.155463	0.00381598	0.00617838	11.849	0.000130235	0.000189186	YPL052W
-0.360935	0.146085	0.21485	-4.75636	1.92509	2.83127	0.000135128	0.000409295	0.0692252	0.0736153	0.0106257	0.0142505	11.8387	0.000130928	0.000190082	YOL057W
0.355544	0.0248223	-0.380366	3.996	0.278981	-4.27498	0.000765105	0.00172271	0.783254	0.401809	0.000403978	0.00100542	11.8305	0.000131478	0.000190769	YNL007C
-0.326585	0.367737	-0.0411513	-3.87601	4.36441	-0.488396	0.00100716	0.00215998	0.000329322	0.00119698	0.630823	0.32374	11.8266	0.00013174	0.000191038	YJL020C
-0.222592	-0.0617167	0.284308	-3.55888	-0.986749	4.54563	0.00207917	0.0039133	0.336089	0.233616	0.000217911	0.000623439	11.8238	0.000131926	0.000191197	YCR053W
-0.269643	-0.0126477	0.282289	-4.04216	-0.189598	4.23173	0.000688341	0.00159082	0.851622	0.421684	0.000445973	0.00108685	11.8171	0.000132382	0.000191746	YPR036W
-0.257395	-0.0621767	0.319572	-3.63034	-0.87695	4.50729	0.00176647	0.00341953	0.391399	0.2592	0.000237771	0.000667359	11.8108	0.000132814	0.00019226	YML010W
-0.171005	0.31086	-0.139855	-2.62455	4.77103	-2.14646	0.0166302	0.0210605	0.000130723	0.000583896	0.0448761	0.0455622	11.8087	0.000132952	0.000192348	YOL100W
-0.116386	0.240049	-0.123661	-2.31629	4.77738	-2.46107	0.0317943	0.0351299	0.00012886	0.000579011	0.0235285	0.0272306	11.8043	0.000133253	0.00019256	YER114C
0.253745	-0.374829	0.121083	3.16915	-4.68143	1.51227	0.00502256	0.00800503	0.0001601	0.000684412	0.146818	0.112768	11.8046	0.000133233	0.00019256	YPR187W
0.279484	-0.109938	-0.169546	4.74199	-1.86531	-2.87668	0.000139592	0.000421903	0.0775588	0.079991	0.00961842	0.0131949	11.8028	0.000133354	0.000192594	YDR538W
0.309125	-0.332382	0.0232567	3.97803	-4.27731	0.299283	0.000797263	0.00177654	0.000401829	0.00140014	0.767953	0.367429	11.792	0.000134098	0.000193556	YHL025W
-0.351993	-0.0435317	0.395525	-3.87412	-0.47912	4.35324	0.00101151	0.00216056	0.637287	0.355847	0.000337831	0.000878906	11.7849	0.000134588	0.000194151	YNL067W
-0.0660707	-0.182936	0.249006	-1.22167	-3.38255	4.60422	0.23668	0.162818	0.00310404	0.00675692	0.000190745	0.000555322	11.7656	0.000135932	0.000195976	YKL173W
-0.25179	0.0350037	0.216787	-4.4007	0.611782	3.78893	0.000303152	0.000801175	0.547888	0.322016	0.00122934	0.00249088	11.7529	0.000136817	0.000197138	YGR240C
0.174293	-0.267229	0.0929347	3.06199	-4.69469	1.63268	0.00638226	0.00969197	0.000155363	0.000669135	0.118896	0.0966964	11.7478	0.000137177	0.000197429	YGL021W
-0.269511	0.219168	0.0503443	-4.48262	3.6453	0.83735	0.000251509	0.000687411	0.00170718	0.00428295	0.412741	0.241475	11.7484	0.000137137	0.000197429	YLR420W
-0.0123313	-0.285403	0.297735	-0.174414	-4.03674	4.21117	0.863373	0.393279	0.000696929	0.00216079	0.000467454	0.00112845	11.7403	0.000137711	0.000198083	YIL159W
0.009629	-0.317581	0.307951	0.126987	-4.18824	4.06123	0.900277	0.402835	0.000492643	0.00165033	0.000658911	0.00150047	11.7373	0.000137923	0.000198273	YBR143C
-0.604979	0.628231	-0.023252	-4.04425	4.19969	-0.155438	0.000685054	0.00158454	0.000479899	0.00161245	0.878105	0.39973	11.7257	0.000138747	0.000199343	YFR034W-A
-0.432723	0.436271	-0.00354767	-4.10533	4.13899	-0.0336575	0.000595606	0.00139727	0.000551423	0.00180549	0.973499	0.423286	11.715	0.000139521	0.000200339	YMR245W
0.304325	-0.118455	-0.18587	4.72074	-1.83749	-2.88324	0.000146464	0.000439498	0.0817303	0.0830415	0.00948083	0.0130511	11.7111	0.000139801	0.000200626	YPL161C
0.200357	0.0891053	-0.289461	3.21449	1.42959	-4.64406	0.00453635	0.00736859	0.168972	0.142932	0.000174255	0.000516402	11.7004	0.000140571	0.000201615	YMR225C
-0.21519	-0.146845	0.362035	-2.80867	-1.91663	4.72529	0.0111639	0.0152773	0.0703543	0.074474	0.000144964	0.000445562	11.682	0.000141914	0.000203424	YGL091C
-0.343418	-0.115353	0.458772	-3.41878	-1.14836	4.56715	0.00285928	0.00504247	0.264986	0.197414	0.000207507	0.000596099	11.6734	0.000142546	0.000204212	YNL053W
0.271206	-0.458292	0.187086	2.79485	-4.72282	1.92797	0.011506	0.0156474	0.000145778	0.000636043	0.068845	0.063439	11.6622	0.00014337	0.000205275	YOR210W
-0.343906	0.017262	0.326645	-4.21395	0.211515	4.00245	0.000464488	0.00112944	0.834724	0.417058	0.000753887	0.00166813	11.6583	0.000143664	0.000205577	YCR025C
-0.30501	0.330997	-0.0259863	-3.93383	4.269	-0.335156	0.000882228	0.001932	0.000409544	0.00142208	0.741157	0.359812	11.6548	0.000143923	0.00020583	YBL013W
-0.218042	0.409406	-0.191364	-2.52581	4.74258	-2.21676	0.0205252	0.0248678	0.000139406	0.000613577	0.0389561	0.0407128	11.6459	0.000144588	0.000206606	YBR096W
-0.566895	0.340359	0.226537	-4.71424	2.83039	1.88386	0.000148637	0.00044437	0.0106463	0.0176308	0.0748836	0.0672409	11.6453	0.000144632	0.000206606	YCL021W-A
0.482493	-0.277456	-0.205037	4.72741	-2.71848	-2.00893	0.000144272	0.000434639	0.0135834	0.0212191	0.0588769	0.0560915	11.6419	0.000144884	0.000206848	YBR238C
-0.307427	0.373671	-0.0662437	-3.65573	4.44347	-0.787728	0.00166699	0.00327172	0.000274981	0.00104262	0.440513	0.252883	11.6264	0.000146054	0.000208399	YKL151C
0.00945267	0.412794	-0.422246	0.0929471	4.05896	-4.1519	0.926913	0.410148	0.000662343	0.00207062	0.000535372	0.00126101	11.6239	0.000146241	0.000208546	YKL026C
-0.090646	-0.188193	0.278839	-1.51044	-3.13587	4.64632	0.147281	0.114309	0.00541139	0.0104081	0.000173364	0.000514303	11.6175	0.000146728	0.000209121	YDR341C
-0.235684	0.151006	0.0846773	-4.67619	2.99609	1.68007	0.000162014	0.000477803	0.00738937	0.0132259	0.109209	0.0906262	11.6046	0.000147716	0.000210409	YOR253W
-0.522956	0.640504	-0.117546	-3.62945	4.44525	-0.815801	0.00177008	0.00342127	0.000273861	0.001041	0.424661	0.24637	11.5814	0.000149503	0.000212832	YML054C-A
-0.255944	0.002024	0.253921	-4.11419	0.0325349	4.08166	0.000583649	0.0013773	0.974383	0.45444	0.000628791	0.00143888	11.5775	0.000149801	0.000213135	YGL100W
0.407003	-0.245409	-0.161592	4.69808	-2.83279	-1.86528	0.000154175	0.00045855	0.0105905	0.0175858	0.0775636	0.0692934	11.5735	0.000150113	0.000213457	YLR179C
0.404957	-0.112183	-0.292773	4.5778	-1.26817	-3.30963	0.000202545	0.000572682	0.219964	0.173126	0.00366084	0.00596843	11.5536	0.000151676	0.000215434	YHR112C
-0.279362	0.05088	0.228482	-4.43776	0.808247	3.62951	0.000278579	0.000748963	0.42889	0.275233	0.00176981	0.00332931	11.5544	0.000151615	0.000215434	YIL075C
-0.256103	0.0568253	0.199277	-4.49682	0.997775	3.49903	0.000243508	0.000669466	0.330849	0.23051	0.0023827	0.00422427	11.5336	0.00015326	0.000217559	YIL002C
0.365188	-0.169149	-0.196039	4.71757	-2.1851	-2.53247	0.000147519	0.000442042	0.0415277	0.0501487	0.0202371	0.0240903	11.5279	0.000153717	0.000218084	YOR092W
-0.254922	0.205078	0.049843	-4.45353	3.58275	0.870767	0.000268741	0.0007253	0.00196906	0.00478059	0.394683	0.233878	11.5227	0.000154139	0.000218558	YBR043C
-0.175614	-0.099861	0.275476	-2.97048	-1.68913	4.65961	0.00782081	0.0114719	0.107436	0.10255	0.000168216	0.00050489	11.5091	0.000155234	0.000219985	YDR395W
0.0972853	0.117924	-0.215208	2.1284	2.57992	-4.7083	0.0465241	0.0471994	0.018295	0.0264924	0.000150648	0.000459019	11.4971	0.000156205	0.000221236	YLR371W
-0.0412353	0.260131	-0.218895	-0.695134	4.38522	-3.69008	0.495333	0.275314	0.000314045	0.001156	0.00154118	0.00298919	11.4888	0.000156884	0.000222071	YDR438W
-0.164445	-0.145854	0.310298	-2.49597	-2.21378	4.70974	0.0218617	0.0260894	0.0391918	0.0479822	0.000150159	0.000458025	11.4827	0.000157386	0.000222655	YKL205W
-0.622308	0.00576033	0.616549	-4.09834	0.0379359	4.06041	0.000605226	0.00141865	0.970132	0.453512	0.000660155	0.00150088	11.4732	0.00015817	0.000223637	YJL135W
0.340732	-0.26982	-0.0709117	4.462	-3.53339	-0.928613	0.000263607	0.000716279	0.00220349	0.00519067	0.364665	0.221027	11.4635	0.000158973	0.000224645	YGL043W
0.127986	-0.335024	0.207039	1.7814	-4.66309	2.88171	0.0907401	0.0787955	0.000166896	0.000707671	0.00951271	0.0130758	11.4516	0.000159966	0.00022592	YPL273W
-0.213851	0.363438	-0.149586	-2.75433	4.68097	-1.92662	0.0125671	0.0167664	0.00016027	0.000684412	0.0690234	0.0635201	11.4473	0.000160324	0.000226298	YIL166C
-0.520052	0.19161	0.328443	-4.64937	1.71303	2.93634	0.000172171	0.000501417	0.102877	0.0991628	0.00843392	0.0118055	11.4347	0.000161381	0.000227661	YCR024C-A
-0.649434	0.290475	0.35896	-4.69339	2.09923	2.59416	0.000155822	0.000461976	0.049302	0.0568737	0.0177474	0.0216725	11.4317	0.000161639	0.000227895	YGL189C
-0.248247	-0.057997	0.306243	-3.58698	-0.838013	4.42498	0.00195015	0.00370454	0.412377	0.268195	0.000286816	0.000775602	11.4264	0.000162082	0.000228262	YJL051W
0.251397	0.0787023	-0.330099	3.42733	1.07296	-4.50029	0.00280431	0.00496429	0.296645	0.214009	0.000241592	0.000675388	11.4269	0.000162045	0.000228262	YNL148C
-0.252267	0.233313	0.0189533	-4.21971	3.90267	0.317035	0.000458415	0.00111934	0.000947491	0.00271921	0.754652	0.363726	11.4223	0.000162431	0.000228495	YDL133W
-0.0942293	-0.155883	0.250111	-1.75315	-2.90021	4.65333	0.0955959	0.0815908	0.00913335	0.0156496	0.00017063	0.000508876	11.4227	0.000162402	0.000228495	YIR023W
0.156811	0.185406	-0.342217	2.15108	2.54333	-4.6944	0.0444639	0.0456839	0.0197764	0.0280611	0.000155467	0.00047115	11.4209	0.000162555	0.00022854	YLR390W
-0.343611	0.0100707	0.333541	-4.12898	0.121013	4.00797	0.000564217	0.0013379	0.904943	0.435954	0.00074442	0.00165367	11.4188	0.000162736	0.000228666	YEL031W
0.255849	0.079131	-0.334979	3.43336	1.06189	-4.49523	0.00276624	0.00490932	0.301513	0.216789	0.000244391	0.00068103	11.4173	0.00016286	0.000228711	YER044C
0.287111	-0.140642	-0.146469	4.6984	-2.30153	-2.39688	0.000154063	0.00045855	0.0327734	0.0418074	0.0269094	0.0301508	11.4154	0.000163026	0.000228815	YPL060W
-0.103352	0.342128	-0.238777	-1.38257	4.57675	-3.19419	0.182734	0.134515	0.000203029	0.000819338	0.00474809	0.00738565	11.396	0.000164686	0.000231015	YJL068C
0.376659	-0.320463	-0.0561947	4.34946	-3.70054	-0.648907	0.000340762	0.000879801	0.00150477	0.00388758	0.524117	0.284721	11.3863	0.000165524	0.00023206	YNR057C
-0.035169	-0.242271	0.277441	-0.546243	-3.76293	4.3092	0.591217	0.309225	0.00130468	0.00346978	0.000373587	0.00095071	11.3844	0.000165692	0.000232164	YGR054W
-0.250437	0.196136	0.0543013	-4.45728	3.49083	0.966455	0.000266459	0.000720531	0.00242755	0.00558306	0.345883	0.212947	11.3706	0.000166895	0.000233719	YHR188C
0.168793	-0.258631	0.0898393	3.01333	-4.61714	1.60384	0.0071119	0.0105426	0.00018523	0.000768101	0.125141	0.100612	11.3648	0.000167403	0.000234298	YAL024C
0.175196	-0.319089	0.143893	2.56944	-4.67978	2.11034	0.0187084	0.0231018	0.000160699	0.000685255	0.0482266	0.0481469	11.3598	0.000167845	0.00023454	YGL058W
0.281709	-0.306906	0.0251977	3.87501	-4.22159	0.346602	0.00100947	0.00216056	0.000456443	0.00156152	0.732675	0.35757	11.3604	0.000167794	0.00023454	YMR246W
-0.0172233	-0.251513	0.268737	-0.268331	-3.91846	4.18679	0.791318	0.374041	0.000913839	0.00265298	0.000494276	0.00117803	11.3597	0.000167858	0.00023454	YOR046C
0.45903	-0.271712	-0.187319	4.66014	-2.75846	-1.90169	0.000168018	0.000492622	0.0124548	0.019839	0.0723889	0.0656803	11.3552	0.000168258	0.000234967	YKL132C
-0.368896	0.068807	0.30009	-4.40518	0.821659	3.58353	0.000300069	0.000794527	0.421399	0.27252	0.00196557	0.00363196	11.3483	0.000168868	0.000235687	YER177W
0.084199	-0.221294	0.137094	1.76537	-4.6398	2.8744	0.0934675	0.0803413	0.000175947	0.000736418	0.00966678	0.0132358	11.3428	0.000169356	0.000236235	YBR236C
0.161036	0.204875	-0.365912	2.05568	2.61529	-4.67098	0.0537293	0.0525968	0.0169634	0.0249361	0.000163939	0.000493105	11.3349	0.000170061	0.000237086	YLR050C
-0.216433	-0.047963	0.264395	-3.59677	-0.797067	4.39382	0.00190712	0.00364089	0.435199	0.27817	0.000307944	0.000821674	11.3329	0.000170242	0.000237206	YGL097W
-0.145977	0.344613	-0.198636	-1.97376	4.6595	-2.68575	0.0630372	0.0594023	0.000168258	0.000712442	0.0145791	0.0184608	11.313	0.000172035	0.00023957	YLR315W
0.28966	0.0272267	-0.316887	3.85568	0.362416	-4.21809	0.00105515	0.00223211	0.721017	0.38336	0.000460108	0.00111262	11.3026	0.000172977	0.000240747	YLR154C
0.0919963	0.229758	-0.321755	1.29753	3.24054	-4.53808	0.209887	0.14894	0.00427812	0.00872591	0.000221685	0.000631666	11.2988	0.000173326	0.000241098	YOR258W
0.32165	-0.41658	0.0949303	3.44301	-4.45915	1.01615	0.00270626	0.00481815	0.000265323	0.00101753	0.322243	0.202425	11.2961	0.000173575	0.00024131	YBL046W
-0.306469	0.296525	0.00994467	-4.11277	3.97932	0.133456	0.000585549	0.00137946	0.000794908	0.00238832	0.895227	0.404189	11.2949	0.000173677	0.000241317	YMR259C
-0.217509	-0.0772193	0.294727	-3.32494	-1.18041	4.50533	0.00353633	0.00599472	0.252315	0.190655	0.000238836	0.00066968	11.2877	0.000174344	0.000241974	YGR167W
-0.131029	-0.175578	0.306606	-1.98982	-2.66633	4.65613	0.0611059	0.0579531	0.0152023	0.0230564	0.000169549	0.000506485	11.2883	0.00017429	0.000241974	YJL111W
-0.213566	-0.005671	0.219236	-3.99095	-0.105975	4.0969	0.000774021	0.0017358	0.916706	0.438008	0.000607228	0.00140206	11.2797	0.000175081	0.000242862	YOL130W
-0.324126	0.507823	-0.183696	-2.94311	4.61111	-1.66799	0.00830878	0.0120425	0.000187784	0.000773996	0.111613	0.0920513	11.2738	0.000175622	0.000243476	YGR296C-B
-0.175046	-0.0866157	0.261661	-3.06478	-1.51651	4.58128	0.00634277	0.0096477	0.145751	0.128363	0.000200949	0.000579629	11.265	0.000176446	0.000244483	YPR103W
-0.250939	0.0557127	0.195226	-4.44234	0.986274	3.45606	0.000275687	0.000742328	0.336316	0.233616	0.00262723	0.00457402	11.2549	0.000177389	0.000245653	YGR223C
-0.444603	0.400322	0.0442803	-4.2336	3.81195	0.421647	0.000444069	0.00109308	0.00116625	0.00322113	0.677985	0.339611	11.2482	0.000178014	0.000246108	YHR214C-E
-0.0636227	0.392652	-0.329031	-0.704081	4.34529	-3.64123	0.489869	0.273057	0.000344018	0.00123737	0.00172311	0.00325671	11.2495	0.000177895	0.000246108	YJL094C
0.177183	0.150118	-0.327299	2.52211	2.13685	-4.65894	0.0206866	0.0249769	0.0457466	0.053693	0.000168475	0.000505128	11.2485	0.000177993	0.000246108	YJR013W
-0.0932103	0.49683	-0.403619	-0.823007	4.38679	-3.56378	0.42065	0.246393	0.000312922	0.0011559	0.00205608	0.00376704	11.2447	0.00017835	0.000246436	YER121W
-0.152791	0.242017	-0.089226	-2.90875	4.6074	-1.69864	0.00896311	0.0127726	0.000189374	0.000777786	0.105602	0.088435	11.2283	0.000179901	0.000248441	YKR098C
0.215626	-0.266772	0.0511447	3.54805	-4.38963	0.841567	0.00213111	0.00398283	0.0003109	0.00115126	0.410433	0.240663	11.2254	0.000180181	0.00024869	YGR210C
-0.370749	0.191947	0.178801	-4.65642	2.41076	2.24564	0.00016944	0.000495301	0.0261421	0.0353715	0.0367385	0.038823	11.2154	0.000181134	0.000249867	YBL101C
0.34698	0.058295	-0.405275	3.68739	0.619506	-4.3069	0.00155068	0.00308278	0.542895	0.320283	0.000375558	0.000953248	11.213	0.000181364	0.000250045	YPL046C
0.040874	0.222997	-0.263871	0.669758	3.65402	-4.32377	0.51102	0.281538	0.00167352	0.0042196	0.000361355	0.000926395	11.2011	0.000182513	0.00025149	YIL007C
0.349434	-0.191125	-0.158308	4.64678	-2.54158	-2.10519	0.000173184	0.00050332	0.0198499	0.0281218	0.048723	0.0484986	11.1972	0.000182892	0.000251873	YPR011C
-0.294013	0.666986	-0.372973	-2.04637	4.64231	-2.59594	0.054721	0.0533496	0.000174949	0.000736418	0.0176802	0.0215998	11.1949	0.000183108	0.000252031	YLR178C
-0.480998	0.284478	0.19652	-4.62609	2.73602	1.89007	0.000181506	0.000522134	0.0130766	0.0206422	0.0740061	0.06673	11.1885	0.000183733	0.000252752	YOR011W
1.21478	-0.798059	-0.416716	4.57653	-3.0066	-1.56993	0.000203129	0.000573669	0.00721904	0.0129983	0.132833	0.104995	11.1851	0.000184069	0.000252953	YGR142W
-0.548547	0.38348	0.165066	-4.53283	3.16883	1.364	0.000224346	0.000624763	0.00502623	0.00981936	0.18841	0.136586	11.1849	0.000184082	0.000252953	YML028W
-0.650817	0.425679	0.225138	-4.57773	2.99415	1.58358	0.000202575	0.000572682	0.00742117	0.0132513	0.129691	0.103086	11.178	0.000184765	0.000253751	YJL189W
-0.0494523	0.284979	-0.235526	-0.75491	4.35032	-3.59539	0.459502	0.261656	0.000340089	0.0012281	0.0019131	0.00354667	11.1758	0.000184976	0.000253901	YMR208W
-0.0169483	0.338112	-0.321163	-0.206761	4.1248	-3.91804	0.838382	0.386432	0.000569641	0.00184388	0.000914721	0.00194764	11.1709	0.000185462	0.000254428	YJR085C
-0.0114667	-0.31543	0.326897	-0.143631	-3.95105	4.09468	0.887295	0.399953	0.000848096	0.00250808	0.000610315	0.0014046	11.1675	0.000185798	0.000254609	YKR041W
-0.135251	-0.184608	0.319859	-1.95745	-2.67178	4.62922	0.0650531	0.0609735	0.015025	0.0228451	0.000180221	0.000530171	11.1681	0.000185733	0.000254609	YMR314W
-0.227667	-0.0644523	0.292121	-3.44658	-0.975722	4.42232	0.00268442	0.00478534	0.341386	0.236062	0.000288561	0.000778823	11.164	0.000186137	0.000254933	YAR008W
-0.238287	0.213019	0.0252693	-4.22782	3.7795	0.448342	0.000449986	0.0011057	0.00125616	0.00339167	0.658946	0.333606	11.1544	0.000187087	0.000256093	YHR074W
-0.122576	-0.335231	0.457807	-1.201	-3.28459	4.48559	0.244419	0.166782	0.00387375	0.00807621	0.000249815	0.000692866	11.1515	0.000187383	0.000256358	YOL010W
-0.618246	0.312874	0.305371	-4.64295	2.34965	2.2933	0.000174695	0.000507185	0.0296803	0.0389255	0.0333316	0.0358607	11.1465	0.000187878	0.000256894	YDR154C
0.379726	-0.380976	0.00124933	4.0113	-4.0245	0.0131975	0.000738761	0.00167553	0.000716754	0.00220185	0.989607	0.428238	11.1293	0.0001896	0.000259106	YER038W-A
0.586762	-0.47923	-0.107531	4.35647	-3.55808	-0.798376	0.000335352	0.000868236	0.00208295	0.004965	0.434457	0.250449	11.1255	0.000189987	0.000259493	YIL170W
-0.0560803	0.26932	-0.21324	-0.915235	4.39532	-3.4801	0.371467	0.226304	0.000306895	0.00113923	0.00248755	0.00438225	11.1225	0.000190287	0.00025976	YPL002C
0.27449	0.109904	-0.384393	3.21456	1.28708	-4.50163	0.00453567	0.00736859	0.21343	0.16958	0.000240858	0.000674006	11.1181	0.000190741	0.000260237	YDR511W
0.282721	0.203468	-0.486187	2.68439	1.9319	-4.61628	0.0146219	0.0189457	0.0683289	0.0728229	0.000185595	0.000542012	11.1159	0.000190964	0.000260399	YDL002C
0.379199	-0.177034	-0.202166	4.6316	-2.16233	-2.46929	0.000179252	0.000516663	0.0434727	0.0518527	0.0231257	0.0268195	11.1078	0.000191787	0.000261378	YOL161C
0.186031	-0.292111	0.106079	2.9149	-4.57705	1.66215	0.00884249	0.0126329	0.000202886	0.000819338	0.112791	0.0927506	11.1023	0.00019235	0.000262002	YHR068W
0.337148	0.312	-0.649148	2.40572	2.22628	-4.632	0.0264181	0.0304269	0.0382124	0.0470126	0.00017909	0.000527949	11.099	0.00019269	0.000262322	YDR384C
-0.1613	0.319107	-0.157808	-2.34122	4.63176	-2.29054	0.0302013	0.0337158	0.000179187	0.000744067	0.0335201	0.035981	11.0928	0.000193332	0.000263052	YDR458C
-0.126329	-0.324916	0.451244	-1.25526	-3.22849	4.48373	0.224511	0.156617	0.00439573	0.00890545	0.000250875	0.000694295	11.0657	0.000196142	0.00026673	YHR071W
-0.142053	-0.147124	0.289177	-2.27109	-2.35217	4.62326	0.0348814	0.0376782	0.0295257	0.0388327	0.000182675	0.000535947	11.0528	0.000197503	0.000268434	YGL207W
0.020221	-0.496571	0.476349	0.166318	-4.0843	3.91798	0.869653	0.395055	0.000624993	0.00197229	0.000914833	0.00194764	11.0509	0.000197696	0.00026855	YFR035C
0.132644	0.238904	-0.371549	1.62796	2.93211	-4.56009	0.119899	0.0975202	0.00851313	0.0147718	0.000210862	0.000603887	11.0448	0.000198346	0.000269286	YCL012C
-0.211027	-0.0481303	0.259158	-3.53703	-0.806713	4.34375	0.0021853	0.0040504	0.429753	0.275543	0.000345233	0.000893206	11.0405	0.000198802	0.000269758	YGR037C
0.406609	-0.165991	-0.240616	4.59345	-1.8752	-2.71824	0.000195467	0.000555957	0.076122	0.0789145	0.0135904	0.0174604	11.0321	0.000199701	0.00027083	YBR070C
-0.0115397	-0.262255	0.273794	-0.172101	-3.91123	4.08332	0.865167	0.39372	0.000929093	0.00267918	0.000626401	0.00143574	11.0306	0.000199855	0.000270892	YLR226W
0.135866	-0.327596	0.191729	1.90588	-4.5954	2.68951	0.0718133	0.065639	0.000194603	0.000793847	0.0144614	0.0183531	11.0247	0.000200494	0.00027161	YPR016C
0.385286	-0.212948	-0.172339	4.60632	-2.54591	-2.06042	0.000189839	0.000541601	0.0196681	0.0279696	0.0532306	0.0518541	11.0114	0.00020192	0.000273289	YLR456W
0.249842	-0.008186	-0.241656	4.06139	-0.13307	-3.92832	0.00065867	0.00153237	0.895528	0.433804	0.000893436	0.00190942	11.0111	0.000201953	0.000273289	YOR213C
-0.223073	-0.307361	0.530435	-1.9321	-2.66215	4.59426	0.068302	0.0632136	0.0153399	0.0231951	0.00019511	0.000564523	11.0052	0.000202589	0.000274001	YML093W
-0.0340503	0.367521	-0.33347	-0.386733	4.17419	-3.78745	0.703224	0.347238	0.000508734	0.00169421	0.00123351	0.00249562	11.0021	0.000202926	0.000274308	YBR005W
-0.108963	0.362405	-0.253443	-1.35098	4.49328	-3.14231	0.192474	0.139826	0.000245477	0.000956038	0.00533394	0.00808672	10.992	0.000204031	0.000275503	YKL066W
-0.25655	0.0258087	0.23074	-4.18701	0.421209	3.76579	0.000494031	0.00119401	0.6783	0.369601	0.0012962	0.00259826	10.9923	0.000204003	0.000275503	YPR189W
-0.112456	-0.304894	0.417351	-1.20036	-3.25444	4.4548	0.244663	0.166876	0.0041462	0.00852032	0.000267965	0.000733084	10.9881	0.000204458	0.00027593	YHR127W
-0.274121	0.440587	-0.166466	-2.83937	4.56365	-1.72427	0.0104389	0.0144704	0.000209163	0.000837357	0.100789	0.0852495	10.9828	0.000205044	0.000276571	YPR172W
0.493806	-0.169697	-0.324109	4.53446	-1.55827	-2.97619	0.000223518	0.000623077	0.135567	0.121757	0.00772262	0.0109469	10.9777	0.000205608	0.000277181	YDL098C
0.102095	0.243572	-0.345666	1.32403	3.15877	-4.48279	0.201106	0.144173	0.00514082	0.0100107	0.000251416	0.000694566	10.9704	0.000206406	0.000278016	YFR039C
-0.564854	0.355021	0.209834	-4.55627	2.86369	1.69258	0.000212703	0.000596095	0.00989684	0.0166173	0.106768	0.0890355	10.97	0.00020645	0.000278016	YIL160C
0.140361	0.126465	-0.266825	2.42158	2.18183	-4.6034	0.025558	0.029656	0.0418024	0.0503995	0.000191102	0.000555786	10.9668	0.00020681	0.00027835	YGR197C
-0.219772	-0.0473607	0.267133	-3.54938	-0.764886	4.31426	0.00212469	0.0039749	0.453677	0.285854	0.000369294	0.000942452	10.96	0.000207568	0.000279219	YLR114C
0.255505	0.0621887	-0.317693	3.49226	0.849998	-4.34224	0.0024197	0.00440169	0.405845	0.265179	0.000346424	0.000895463	10.9522	0.000208434	0.000280233	YDR517W
-0.0980803	0.359868	-0.261787	-1.21281	4.44993	-3.23711	0.239976	0.164374	0.000270961	0.00103258	0.00431124	0.00682697	10.9447	0.000209278	0.000281216	YPL164C
-0.296518	-0.0102227	0.306739	-3.91394	-0.134936	4.04886	0.00092335	0.00200482	0.894073	0.433366	0.000677856	0.00153675	10.9374	0.000210105	0.000282175	YKR018C
-0.293471	0.046722	0.24675	-4.27783	0.681051	3.5968	0.000401351	0.00100742	0.504005	0.30653	0.00190698	0.00354	10.9271	0.000211265	0.00028358	YER089C
0.242006	-0.167851	-0.0741543	4.48571	-3.11121	-1.37449	0.000249748	0.000683934	0.00571833	0.0108888	0.185186	0.134794	10.9236	0.000211666	0.000283965	YHR219W
0.438855	0.006203	-0.445059	3.95018	0.0558339	-4.00602	0.000849792	0.00187271	0.956053	0.449623	0.000747745	0.00165845	10.9115	0.000213053	0.000285672	YBR126W-B
0.0751027	-0.343866	0.268764	0.953944	-4.36774	3.41381	0.352017	0.218207	0.000326833	0.0011941	0.0028917	0.00493474	10.9067	0.000213607	0.000286261	YER055C
0.207875	0.304134	-0.512008	1.85359	2.71191	-4.56549	0.0792931	0.0707656	0.0137779	0.0214362	0.00020829	0.000597738	10.9041	0.000213898	0.000286497	YER135C
0.382785	-0.103163	-0.279621	4.43299	-1.19472	-3.23826	0.000281624	0.000754974	0.246807	0.188011	0.00430008	0.00681314	10.8804	0.00021665	0.000290027	YNL147W
-0.053591	-0.260696	0.314287	-0.730853	-3.55527	4.28613	0.473731	0.266288	0.00209634	0.00498902	0.000393813	0.000988873	10.8735	0.000217463	0.000290959	YKL104C
0.235252	-0.295398	0.060144	3.45489	-4.33818	0.883268	0.00263422	0.00470786	0.000349655	0.00125315	0.388063	0.230879	10.8705	0.000217819	0.000291279	YFL028C
-0.314144	0.0583663	0.255776	-4.30798	0.800401	3.50756	0.000374632	0.000950588	0.433312	0.277317	0.00233691	0.00415962	10.8588	0.000219198	0.000292966	YHR186C
-0.222172	-0.024587	0.24676	-3.74448	-0.414389	4.15888	0.00136093	0.00277213	0.683202	0.370862	0.000526881	0.00124892	10.8542	0.000219735	0.000293526	YNL229C
-0.0650613	0.353365	-0.288303	-0.792409	4.30378	-3.51136	0.437844	0.253903	0.000378238	0.00134122	0.00231679	0.00412884	10.8511	0.000220104	0.000293861	YGL104C
-0.224665	0.321897	-0.097233	-3.11517	4.46338	-1.34822	0.00566796	0.00882267	0.000262781	0.00101036	0.193344	0.139102	10.8386	0.000221603	0.000295704	YKL100C
-0.354937	0.108975	0.245963	-4.46714	1.37153	3.09562	0.000260538	0.000710008	0.186093	0.154336	0.00592098	0.0088105	10.8302	0.000222614	0.000296735	YLR183C
0.272221	-0.108637	-0.163584	4.54601	-1.81421	-2.7318	0.000217722	0.000608739	0.0853696	0.085921	0.0131968	0.0170561	10.8305	0.000222571	0.000296735	YOL036W
-0.282271	0.324837	-0.0425647	-3.65598	4.20729	-0.551298	0.00166603	0.00327172	0.000471621	0.00159353	0.587815	0.308306	10.8137	0.000224611	0.000299237	YLR092W
0.0824257	-0.313319	0.230894	1.15911	-4.40605	3.24695	0.260683	0.174458	0.00029947	0.00111857	0.00421681	0.00670766	10.7889	0.000227649	0.000303122	YHR128W
0.355396	-0.082487	-0.272909	4.36285	-1.01261	-3.35023	0.000330497	0.000858845	0.323889	0.227609	0.00333973	0.00556097	10.7835	0.000228312	0.000303843	YJL073W
-0.0436443	-0.259548	0.303191	-0.607292	-3.61149	4.21877	0.550802	0.295827	0.00184411	0.00453947	0.000459401	0.00111262	10.7579	0.000231506	0.000307929	YNL082W
-0.500282	0.0500877	0.450196	-4.14064	0.414556	3.72609	0.000549353	0.00130962	0.683081	0.370862	0.00141939	0.00280323	10.7547	0.000231905	0.000308295	YMR230W
-0.363994	0.288035	0.0759597	-4.32222	3.42025	0.901978	0.000362635	0.000927316	0.00284976	0.00629904	0.378291	0.226822	10.7522	0.000232219	0.000308548	YMR191W
0.588518	-0.458444	-0.130072	4.34013	-3.38088	-0.959243	0.000348096	0.000896256	0.00311583	0.00677498	0.34941	0.214508	10.7502	0.00023248	0.00030873	YMR320W
-0.234876	0.231494	0.003382	-3.97432	3.91709	0.0572265	0.000804064	0.00179027	0.000916717	0.00265394	0.954959	0.418868	10.7346	0.000234457	0.000311189	YGL142C
-0.0304757	0.301319	-0.270844	-0.418499	4.13779	-3.71929	0.680245	0.339243	0.000552946	0.00180549	0.00144162	0.0028332	10.7303	0.000235007	0.000311587	YDL113C
-0.075148	0.445172	-0.370025	-0.718292	4.25512	-3.53683	0.481263	0.269225	0.00042275	0.00145952	0.00218628	0.00395915	10.7308	0.000234939	0.000311587	YLR252W
-0.085463	-0.249185	0.334649	-1.11921	-3.26328	4.3825	0.276915	0.182313	0.00406445	0.0083982	0.000316002	0.000836824	10.7228	0.000235962	0.000312687	YHR148W
0.229873	0.148635	-0.378507	2.74208	1.77301	-4.51509	0.0129059	0.017143	0.0921579	0.0911747	0.000233591	0.000657807	10.7024	0.000238607	0.000315856	YDL146W
0.198391	0.155189	-0.353581	2.54651	1.99198	-4.53851	0.0196432	0.0240386	0.0608501	0.0669559	0.000221467	0.000631666	10.7031	0.000238508	0.000315856	YDR096W
0.130748	-0.697413	0.566665	0.801992	-4.27784	3.47584	0.432413	0.251551	0.000401349	0.00140014	0.00251172	0.00441452	10.6941	0.000239686	0.000317116	YPL250C
0.340682	-0.0967527	-0.243931	4.41022	-1.25249	-3.15775	0.000296639	0.000789179	0.225496	0.17642	0.00515264	0.007867	10.6822	0.000241244	0.000319008	YKL198C
-0.382513	0.281649	0.100864	-4.38412	3.22808	1.15603	0.000314839	0.000826598	0.00439981	0.00890772	0.261908	0.172865	10.6778	0.000241821	0.000319601	YGR174C
-0.46008	0.11278	0.3473	-4.35901	1.06853	3.29048	0.000333409	0.000864005	0.298587	0.215097	0.00382258	0.00618551	10.6753	0.000242156	0.000319874	YBR031W
-0.512006	0.421251	0.0907557	-4.25357	3.49961	0.753967	0.000424245	0.00105449	0.00237959	0.00550641	0.460054	0.260484	10.6541	0.000244972	0.000323423	YOR185C
-0.273745	0.119203	0.154542	-4.52526	1.97054	2.55472	0.000228245	0.000633101	0.0634304	0.0690631	0.0193037	0.0231706	10.6469	0.000245943	0.000324533	YDR207C
-0.0508573	0.294868	-0.244009	-0.731798	4.24292	-3.5111	0.473167	0.266132	0.000434706	0.00149565	0.00231815	0.00412884	10.6394	0.000246957	0.000325526	YDR387C
0.0358653	0.182685	-0.218551	0.694068	3.53534	-4.22942	0.495987	0.275588	0.00219372	0.00517172	0.000448342	0.00108979	10.6402	0.000246838	0.000325526	YJL083W
0.296175	-0.482005	0.18583	2.76222	-4.49533	1.73311	0.0123534	0.0165584	0.000244333	0.000952815	0.0991752	0.0841372	10.631	0.000248087	0.000326842	YIL053W
-0.081576	-0.205318	0.286894	-1.25093	-3.14845	4.39939	0.226051	0.157495	0.00526106	0.01016	0.000304055	0.00081284	10.6278	0.000248523	0.000327095	YIL116W
-0.00182833	-0.387498	0.389327	-0.0184818	-3.91704	3.93552	0.985446	0.42457	0.000916814	0.00265394	0.00087881	0.0018881	10.6277	0.000248541	0.000327095	YLL062C
-0.0981337	-0.15755	0.255685	-1.7226	-2.76557	4.48818	0.101098	0.0852253	0.0122637	0.019628	0.000248348	0.000689477	10.6027	0.000251961	0.00033142	YER068W
0.118814	0.178253	-0.297066	1.79781	2.69719	-4.49498	0.0880179	0.0767412	0.0142235	0.0218806	0.000244531	0.00068103	10.5863	0.00025424	0.000334242	YIL027C
-0.17937	-0.257226	0.436597	-1.84848	-2.65082	4.49931	0.0800598	0.0712454	0.0157182	0.0235686	0.000242131	0.000676222	10.5779	0.000255409	0.000335595	YFR009W-A
0.138682	-0.510144	0.371462	1.18898	-4.37366	3.18469	0.249006	0.168905	0.000322442	0.00117949	0.00485046	0.00751166	10.577	0.000255539	0.000335595	YHR089C
0.231885	-0.329503	0.097617	3.09797	-4.40214	1.30416	0.00588998	0.00907239	0.000302155	0.0011258	0.207662	0.146481	10.5743	0.000255913	0.000335909	YBR135W
0.0668187	0.544892	-0.61171	0.450169	3.67104	-4.1212	0.657651	0.332537	0.00160972	0.004093	0.000574356	0.001332	10.5696	0.000256576	0.000336602	YIR019C
-0.110211	-0.108551	0.218764	-2.27764	-2.24333	4.52099	0.0344176	0.0372779	0.0369117	0.04573	0.000230475	0.000653403	10.5682	0.000256768	0.000336677	YLR096W
-0.075963	0.364762	-0.288798	-0.892173	4.28407	-3.39189	0.383391	0.231253	0.000395668	0.00138909	0.00303908	0.0051333	10.5664	0.000257027	0.000336839	YPL003W
-0.0508987	-0.176392	0.22729	-0.963893	-3.34042	4.30429	0.347133	0.216233	0.00341471	0.00727536	0.000377797	0.000957203	10.5527	0.000258967	0.000339203	YBR281C
-0.0816773	0.493406	-0.411729	-0.697479	4.21341	-3.51594	0.493898	0.274755	0.000465064	0.00158202	0.0022928	0.00409406	10.5481	0.000259621	0.000339881	YBR300C
0.336278	-0.0931087	-0.243169	4.37322	-1.21086	-3.16235	0.000322771	0.000843411	0.240706	0.184766	0.00509973	0.00779727	10.5449	0.000260086	0.000340271	YBR063C
-0.559074	0.663789	-0.104714	-3.53727	4.1998	-0.662529	0.0021841	0.0040504	0.000479777	0.00161245	0.51554	0.281803	10.5441	0.000260192	0.000340271	YDL130W-A
-0.224467	0.0476797	0.176786	-4.28477	0.910139	3.37461	0.00039504	0.000996948	0.37408	0.25138	0.00316042	0.00530322	10.5393	0.000260881	0.000340993	YGL094C
-0.286918	0.142181	0.144736	-4.5112	2.23551	2.27568	0.000235664	0.000650456	0.0375034	0.0462916	0.0345557	0.0368993	10.5226	0.000263287	0.000343957	YJL167W
0.168332	-0.271171	0.102837	2.77333	-4.46762	1.69428	0.0120585	0.0162216	0.000260251	0.00100448	0.10644	0.0889323	10.5207	0.000263567	0.000344143	YKL048C
-0.287161	0.149251	0.137909	-4.50866	2.34335	2.16528	0.000237035	0.000653596	0.0300687	0.0393467	0.0432159	0.0441475	10.5159	0.00026426	0.000344867	YER080W
0.213769	0.105488	-0.319256	2.96245	1.46187	-4.4243	0.00796102	0.0116228	0.16002	0.137878	0.000287262	0.000776061	10.509	0.000265271	0.000346005	YDR197W
-0.294234	-0.0559643	0.350197	-3.5248	-0.670429	4.19522	0.00224697	0.00414548	0.510602	0.308858	0.000484833	0.00116044	10.5042	0.000265979	0.000346747	YER090W
-0.267514	-0.0427827	0.310296	-3.58122	-0.572733	4.15394	0.00197594	0.00373911	0.5735	0.331495	0.000532877	0.00125724	10.4817	0.000269296	0.000350888	YHL016C
-0.243097	-0.0569633	0.30006	-3.43387	-0.804638	4.23851	0.00276299	0.00490666	0.430921	0.276022	0.000439112	0.00107573	10.4802	0.000269523	0.000351	YGL195W
0.241132	-0.230507	-0.010625	3.98321	-3.8077	-0.175513	0.000787853	0.00175977	0.00117765	0.00323186	0.862522	0.395196	10.4772	0.000269961	0.000351387	YML076C
0.303482	-0.186142	-0.11734	4.4612	-2.73629	-1.72491	0.000264088	0.00071689	0.0130689	0.0206422	0.100673	0.0851766	10.4667	0.000271531	0.000353245	YBR087W
-0.256851	0.130076	0.126774	-4.49816	2.27799	2.22017	0.000242767	0.00066809	0.034393	0.0434135	0.0386886	0.0404787	10.4622	0.000272211	0.000353945	YNL094W
-0.282975	0.349924	-0.0669497	-3.42474	4.235	-0.810268	0.00282086	0.00498727	0.000442652	0.00151779	0.427756	0.247786	10.4514	0.000273831	0.000355866	YDL183C
-0.0923423	-0.245042	0.337386	-1.1905	-3.15914	4.34966	0.248422	0.168673	0.00513654	0.0100089	0.000340605	0.000883559	10.4502	0.000274019	0.000355925	YOR270C
0.225758	-0.19718	-0.028577	4.12753	-3.60504	-0.522473	0.000566089	0.00134039	0.00187145	0.00459327	0.607343	0.31514	10.4463	0.000274604	0.000356499	YLR290C
-0.058176	-0.191133	0.249309	-1.00198	-3.29194	4.29392	0.328865	0.207767	0.00381005	0.00797102	0.000386857	0.000974888	10.437	0.000276032	0.000358166	YKR028W
0.302708	-0.0534967	-0.249212	4.20861	-0.743774	-3.46484	0.000470201	0.00114234	0.466056	0.291073	0.00257536	0.00450143	10.4342	0.000276449	0.00035852	YJL058C
-0.0963437	0.33288	-0.236537	-1.26236	4.3616	-3.09926	0.222002	0.15537	0.000331446	0.0012022	0.00587313	0.00876247	10.4176	0.000279004	0.000361645	YNL045W
0.076591	-0.290281	0.213691	1.14255	-4.33029	3.18775	0.26733	0.177676	0.000356013	0.00127291	0.00481719	0.00746836	10.4163	0.00027921	0.000361724	YLR357W
0.265849	0.211099	-0.476948	2.49475	1.98097	-4.47572	0.021918	0.0261145	0.0621632	0.0681021	0.000255495	0.000704451	10.403	0.000281271	0.000364016	YMR262W
0.11074	0.156785	-0.267525	1.84768	2.61594	-4.4636	0.0801795	0.0713066	0.0169399	0.0249136	0.000262645	0.000721336	10.4033	0.000281232	0.000364016	YOR138C
0.033129	0.228124	-0.261253	0.522071	3.59494	-4.11701	0.607617	0.315722	0.00191506	0.00467209	0.00057989	0.00134226	10.3912	0.000283111	0.000366207	YJL205C
0.122358	0.2368	-0.359157	1.50092	2.90474	-4.40565	0.149709	0.115649	0.00904276	0.015512	0.000299743	0.000802839	10.3754	0.000285608	0.000369245	YGL248W
0.13349	-0.306341	0.17285	1.94648	-4.46688	2.5204	0.0664427	0.0619287	0.00026069	0.00100464	0.0207615	0.0245528	10.3734	0.000285926	0.000369464	YMR321C
-0.0623757	-0.256151	0.318526	-0.827258	-3.3972	4.22445	0.418296	0.245328	0.00300269	0.00658054	0.000453461	0.00110129	10.3655	0.000287181	0.000370894	YML106W
0.199805	-0.4519	0.252094	1.97481	-4.46643	2.49161	0.0629091	0.0593303	0.000260961	0.00100464	0.0220637	0.0258329	10.3606	0.000287972	0.000371723	YCR101C
-0.287025	-0.0210703	0.308095	-3.72991	-0.27381	4.00371	0.00140704	0.00283917	0.787166	0.40282	0.000751713	0.00166463	10.3468	0.00029019	0.000374198	YER116C
-0.047955	0.328543	-0.280588	-0.604419	4.14092	-3.5365	0.55267	0.296187	0.000548993	0.00180433	0.00218791	0.00395956	10.3476	0.000290052	0.000374198	YPL274W
-0.281729	0.281809	-7.9e-05	-3.8733	3.8744	-0.00108612	0.00101342	0.00216131	0.00101086	0.00286557	0.999145	0.430356	10.3456	0.000290384	0.000374254	YBL016W
-0.270147	0.196793	0.0733543	-4.32201	3.14843	1.17357	0.00036281	0.000927316	0.00526136	0.01016	0.254978	0.169845	10.3305	0.000292832	0.000377214	YKR003W
0.199352	-0.238313	0.0389603	3.48486	-4.16594	0.681063	0.00246075	0.00445626	0.000518439	0.00172271	0.503997	0.27738	10.3282	0.000293199	0.000377492	YML114C
0.271182	0.114602	-0.385785	3.05729	1.29202	-4.34931	0.00644949	0.00976756	0.211751	0.168557	0.000340876	0.000883559	10.3178	0.000294909	0.000379497	YIR027C
0.0868083	0.260675	-0.347483	1.07198	3.21903	-4.29101	0.297074	0.191928	0.0044903	0.00904228	0.000389447	0.000978784	10.3147	0.000295409	0.000379944	YNL334C
0.019971	0.408039	-0.428011	0.184575	3.77116	-3.95574	0.855506	0.390774	0.00128036	0.00342932	0.000839035	0.00182354	10.3077	0.000296569	0.000381099	YBR051W
-0.804921	0.0566093	0.748313	-3.99967	0.281293	3.71838	0.000758709	0.00171159	0.781507	0.401152	0.00144463	0.0028332	10.3074	0.000296613	0.000381099	YPR036W-A
0.2484	-0.093525	-0.154875	4.41499	-1.66229	-2.7527	0.000293425	0.000782861	0.112763	0.10599	0.0126115	0.0164661	10.2833	0.000300636	0.000386069	YJR062C
-0.0761437	-0.170222	0.246366	-1.34579	-3.00857	4.35437	0.194112	0.140489	0.00718756	0.0129571	0.000336962	0.00087827	10.28	0.000301189	0.00038658	YDR514C
0.34077	-0.0967613	-0.24401	4.32608	-1.22838	-3.0977	0.000359455	0.000921265	0.234209	0.181293	0.00589358	0.00878513	10.2787	0.000301395	0.000386645	YOR298C-A
-0.290286	0.302879	-0.0125913	-3.77643	3.94024	-0.163805	0.00126503	0.00260905	0.000869353	0.00255704	0.871604	0.397556	10.2767	0.000301735	0.000386882	YOL119C
0.126469	0.146233	-0.272702	2.06476	2.38742	-4.45219	0.0527771	0.0519605	0.027444	0.0366907	0.000269564	0.000736682	10.2668	0.000303406	0.000388825	YMR209C
-0.134797	-0.155902	0.290699	-2.0643	-2.38751	4.4518	0.0528251	0.0519845	0.0274393	0.0366907	0.000269804	0.000736682	10.2651	0.000303698	0.000388999	YLR028C
0.316985	-0.336149	0.0191647	3.74054	-3.96668	0.22615	0.00137327	0.00278509	0.00081827	0.00244631	0.823485	0.383876	10.2642	0.000303861	0.000389008	YBL081W
-0.203684	-0.055771	0.259454	-3.32109	-0.90935	4.23041	0.00356729	0.00603988	0.374486	0.25154	0.000447321	0.00108825	10.2558	0.000305289	0.000390635	YPL101W
0.239969	-0.024468	-0.215501	4.04511	-0.412452	-3.63267	0.000683703	0.00158272	0.684596	0.371284	0.00175712	0.00330987	10.2476	0.000306685	0.00039222	YNL052W
-0.30247	0.25029	0.05218	-4.15993	3.44229	0.717642	0.000525613	0.00125946	0.00271069	0.00606461	0.481655	0.269461	10.227	0.000310245	0.000396569	YCR089W
0.145093	0.166385	-0.311479	2.06883	2.37242	-4.44126	0.0523559	0.0516316	0.0283127	0.0375821	0.000276363	0.00075193	10.2145	0.000312417	0.000399141	YGL186C
0.0852407	0.164744	-0.249984	1.4905	2.88067	-4.37116	0.152407	0.117016	0.00953456	0.0161169	0.00032429	0.000852722	10.2123	0.000312804	0.00039943	YGL079W
0.011596	0.228063	-0.239659	0.19057	3.74802	-3.93859	0.850871	0.390097	0.00134998	0.00356504	0.00087265	0.00188106	10.2018	0.000314647	0.000401578	YLR436C
0.197848	0.078293	-0.27614	3.08719	1.22167	-4.30885	0.0060335	0.00924258	0.236681	0.182514	0.000373882	0.00095071	10.1994	0.000315073	0.000401916	YDR320C-A
-0.336873	0.268014	0.068859	-4.20287	3.34378	0.859094	0.000476417	0.00115643	0.00338885	0.00723153	0.400931	0.236198	10.1972	0.000315465	0.00040221	YHR190W
-0.277382	0.264317	0.013065	-3.93349	3.74822	0.185272	0.000882905	0.001932	0.00134935	0.00356504	0.854967	0.393312	10.1878	0.000317128	0.000403917	YBL017C
0.269159	-0.197998	-0.071161	4.28336	-3.15091	-1.13245	0.000396309	0.00099835	0.00523218	0.0101232	0.271449	0.17733	10.1885	0.000317001	0.000403917	YHR218W
0.0166763	-0.296154	0.279476	0.22235	-3.9487	3.72634	0.826399	0.383498	0.000852673	0.00251914	0.00141859	0.00280323	10.178	0.000318884	0.000405946	YNR009W
0.235214	-0.211909	-0.0233043	4.02566	-3.6268	-0.398851	0.000714855	0.00163589	0.00178081	0.00441977	0.694423	0.344619	10.175	0.000319416	0.000406415	YML133C
-0.2792	-0.0513197	0.33052	-3.48119	-0.639878	4.12108	0.00248137	0.00448625	0.529846	0.315302	0.000574509	0.001332	10.1725	0.000319862	0.000406775	YLR384C
-0.0251573	0.274523	-0.249364	-0.367454	4.00975	-3.64227	0.717316	0.351283	0.000741387	0.00225908	0.001719	0.00325112	10.1614	0.000321862	0.00040911	YBR036C
-0.169529	0.00942233	0.160107	-3.94096	0.219036	3.72193	0.000867927	0.00190667	0.828943	0.415788	0.00143295	0.00282804	10.1451	0.000324828	0.000412669	YGR047C
-0.567722	-0.0340087	0.60173	-3.71939	-0.222805	3.94219	0.0014413	0.00289786	0.82605	0.414752	0.000865486	0.00186947	10.1425	0.000325304	0.000413063	YDR524C-B
0.400844	-0.014114	-0.386729	3.901	-0.137357	-3.76363	0.000951115	0.00205237	0.892185	0.433288	0.0013026	0.00260923	10.1347	0.000326742	0.000414678	YHR177W
0.400324	-0.226549	-0.173774	4.41154	-2.49655	-1.91498	0.000295747	0.000788304	0.0218347	0.0303903	0.0705769	0.0646115	10.1209	0.000329291	0.000417275	YER146W
-0.371251	0.220942	0.150309	-4.39823	2.61752	1.78072	0.000304863	0.000804937	0.0168827	0.0248416	0.0908539	0.078903	10.1227	0.00032896	0.000417275	YNL018C
-1.15936	0.666355	0.493003	-4.40793	2.53351	1.87442	0.000298187	0.000791776	0.0201926	0.0285401	0.0762344	0.0682577	10.121	0.000329262	0.000417275	YPR160W
0.277786	-0.220529	-0.057256	4.18822	-3.32496	-0.863258	0.00049266	0.00119173	0.00353621	0.00749711	0.398695	0.235391	10.114	0.000330562	0.000418673	YDL104C
-0.307973	0.146512	0.161462	-4.42033	2.10288	2.31745	0.000289875	0.000774866	0.0489467	0.0566135	0.0317181	0.0343747	10.1107	0.000331189	0.000419254	YER136W
-0.152261	-0.231948	0.38421	-1.73993	-2.65054	4.39048	0.0979429	0.0831665	0.0157279	0.0235686	0.0003103	0.000827176	10.1096	0.000331379	0.000419281	YPR033C
-0.141199	-0.142775	0.283975	-2.19811	-2.22266	4.42078	0.0404529	0.0423241	0.0384938	0.0473201	0.000289578	0.00078007	10.1049	0.000332272	0.000420198	YDL127W
0.0997263	0.155313	-0.25504	1.71468	2.67043	-4.38513	0.102568	0.086256	0.0150688	0.0229001	0.000314114	0.000833772	10.0999	0.000333211	0.000421171	YBL045C
0.132369	0.386633	-0.519002	1.08429	3.16705	-4.25134	0.291721	0.189081	0.00504625	0.00985207	0.000426413	0.00104827	10.0927	0.000334564	0.000422667	YNL112W
-0.117869	0.254204	-0.136334	-2.0457	4.41189	-2.36617	0.0547929	0.0533952	0.000295506	0.001107	0.0286819	0.0315956	10.0819	0.000336612	0.000425039	YPL172C
-0.0664723	0.299641	-0.233169	-0.932531	4.20362	-3.2711	0.362689	0.222701	0.000475598	0.00160516	0.00399347	0.00641405	10.079	0.000337159	0.000425514	YDR435C
0.205339	-0.526232	0.320894	1.70706	-4.37476	2.66771	0.103999	0.0871718	0.000321633	0.00117849	0.0151572	0.0190471	10.0546	0.00034184	0.000431203	YIL164C
0.0707593	0.388758	-0.459517	0.630159	3.46215	-4.09231	0.53605	0.290749	0.00259115	0.00585794	0.00061364	0.00140994	10.0412	0.000344434	0.000434255	YLR099W-A
0.268048	0.0187413	-0.28679	3.6805	0.257332	-3.93784	0.0015753	0.0031202	0.799671	0.406684	0.00087415	0.0018824	10.0372	0.000345219	0.000435025	YMR222C
-0.274725	0.0449483	0.229777	-4.10642	0.671861	3.43456	0.000594119	0.00139521	0.50971	0.308504	0.00275866	0.00474225	10.0343	0.000345793	0.000435403	YML048W
0.192164	-0.239081	0.0469157	3.34119	-4.15695	0.815732	0.00340873	0.00581362	0.000529215	0.00175272	0.424699	0.24637	10.0339	0.000345869	0.000435403	YPR120C
0.310797	-0.353389	0.0425907	3.54715	-4.03325	0.48609	0.00213549	0.00398283	0.000702522	0.00217192	0.632428	0.324267	10.0258	0.000347462	0.000437143	YDR156W
0.224302	-0.199944	-0.0243593	4.01252	-3.57678	-0.435762	0.00073669	0.00167219	0.00199603	0.00482985	0.66789	0.336559	10.0251	0.000347602	0.000437143	YGR220C
-0.347476	0.148396	0.199079	-4.38702	1.87356	2.51346	0.00031276	0.000822683	0.076359	0.0790489	0.0210687	0.0248751	10.0216	0.000348279	0.000437774	YER166W
-0.177834	-0.0612307	0.239064	-3.15127	-1.08502	4.23628	0.00522802	0.00827595	0.291403	0.211138	0.000441355	0.0010784	10.0148	0.000349628	0.000439248	YHR099W
-0.0502767	0.202602	-0.152325	-1.04853	4.2253	-3.17677	0.307469	0.197413	0.000452588	0.00155009	0.00493747	0.00760869	10.0115	0.000350274	0.000439837	YCR009C
-0.263849	-0.062556	0.326404	-3.35064	-0.794403	4.14503	0.00333664	0.00572556	0.43671	0.278781	0.000543856	0.00127672	10.0097	0.000350635	0.000440069	YLR055C
-0.236796	-0.021984	0.258781	-3.63028	-0.337033	3.96733	0.00176674	0.00341953	0.739763	0.389418	0.00081705	0.00178013	10.0073	0.000351111	0.000440444	YHR098C
-0.148575	-0.106066	0.25464	-2.55456	-1.82368	4.37822	0.0193103	0.0237245	0.0838726	0.0847605	0.000319102	0.000843445	10.0033	0.00035192	0.000441237	YBL051C
-0.226382	-0.231199	0.457581	-2.17392	-2.22017	4.3941	0.0424728	0.0440913	0.0386881	0.0474814	0.000307751	0.000821674	9.98353	0.000355883	0.000445982	YIL091C
0.336933	-0.243177	-0.0937567	4.25496	-3.07096	-1.18401	0.000422898	0.00105207	0.00625601	0.0116115	0.250922	0.167899	9.97463	0.000357687	0.000447792	YIL070C
0.027788	-0.243462	0.215673	0.457931	-4.01212	3.55417	0.652164	0.331079	0.000737374	0.00225141	0.0021016	0.00383545	9.97518	0.000357577	0.000447792	YML099C
0.221592	0.081604	-0.303198	3.10121	1.14206	-4.24328	0.0058476	0.00903696	0.267532	0.199015	0.000434348	0.00106498	9.97114	0.000358397	0.000448455	YDL142C
0.184203	0.323466	-0.507669	1.57353	2.76317	-4.3367	0.131997	0.104628	0.0123278	0.0196991	0.000350836	0.000904374	9.96801	0.000359036	0.000449029	YER091C-A
0.37789	-0.198389	-0.179502	4.38822	-2.30378	-2.08446	0.000311903	0.0008212	0.0326224	0.0417209	0.0507653	0.0500243	9.96482	0.000359688	0.000449619	YKL076C
-0.015363	-0.258555	0.273917	-0.21906	-3.68671	3.90576	0.828925	0.38397	0.0015531	0.00397928	0.000940815	0.0019969	9.95995	0.000360685	0.000450639	YML037C
0.156976	0.139608	-0.296584	2.32071	2.06394	-4.38466	0.0315061	0.0348803	0.0528627	0.0601228	0.000314451	0.000833772	9.95169	0.000362382	0.000452532	YMR017W
0.0312927	0.206726	-0.238019	0.530492	3.50454	-4.03504	0.601879	0.313513	0.00235304	0.00545755	0.000699658	0.00157163	9.94271	0.000364238	0.000454622	YJL102W
0.0248707	0.218382	-0.243253	0.407312	3.57649	-3.9838	0.688303	0.342042	0.00199737	0.00482985	0.000786803	0.00172333	9.93688	0.00036545	0.000455907	YLR093C
-0.134739	-0.112912	0.247651	-2.38146	-1.99568	4.37714	0.0277862	0.0316767	0.0604142	0.066598	0.000319894	0.000844744	9.93193	0.000366481	0.000456964	YJL186W
-0.109055	-0.0986403	0.207696	-2.30005	-2.08039	4.38045	0.032873	0.0360253	0.051175	0.0585572	0.000317482	0.000839952	9.92958	0.000366972	0.000457347	YDR283C
[truncated: 4,533 more rows]
