# Supplementary material for: Genetic Architecture of Ethanol-Responsive Transcriptome Variation in Saccharomyces cerevisiae Strains
Source: Oxford University Press journal article supplement (doi:10.1534/genetics.114.167429), 2014-06-26
Supplement: genetics.114.167429-10.xls [file genetics.114.167429-10.xls]

## Sheet: Header Descriptions
peaks.chr	chromosome of eQTL peak
peaks.pos	position of eQTL peak (cM)
peaks.lod	LOD score of eQTL peak
cis (+/- 20 cM)	1 = local linkage, 0 = distant linkage
trait.chr	chromosome of trait
trait.pos	position of trait (cM)

## Sheet: Combined Basal
UID	peaks.chr	peaks.pos	peaks.lod	cis (+/- 20 cM)	trait.chr	trait.pos
YAL048C	1	12.7	4.24913	1	1	24.6555
YAL062W	1	12.7	14.4604	1	1	14.1844
YAL064W-B	1	12.7	24.4447	1	1	5.39648
YAL065C	1	12.7	12.1221	1	1	5.35373
YAL067C	1	12.7	12.2694	1	1	4.0329
YAR053W	1	12.7	7.98992	0	1	93.7421
YAR060C	1	12.7	4.5054	0	1	97.8486
YDR362C	1	12.7	5.3268	0	4	371.587
YEL053W-A	1	12.7	4.49997	0	5	18.5019
YGL205W	1	12.7	5.26113	0	7	40.0562
YOR273C	1	12.7	8.21909	0	15	276.042
YOR363C	1	12.7	10.306	0	15	337.663
YOR364W	1	12.7	5.03875	0	15	337.716
YPR128C	1	12.7	10.9949	0	16	229.758
YAL061W	1	13.7	6.66415	1	1	15.0326
YDR056C	1	13.7	4.51949	0	4	175.35
YER015W	1	13.7	8.9533	0	5	64.6088
YBR148W	1	14.7	4.10651	0	2	161.394
YKL181W	1	14.7	5.77161	0	11	40.7681
YGR264C	1	15.7	4.34279	0	7	378.073
YIL160C	1	16.7	5.84986	0	9	18.6309
YMR246W	1	16.7	5.08669	0	13	258.288
YAL056W	1	17.7	16.0118	1	1	17.6528
YDR118W-A	1	17.7	5.80726	0	4	213.232
YIR033W	1	17.7	10.4228	0	9	187.273
YJL188C	1	17.7	4.46597	0	10	22.9511
YOL101C	1	18.7	12.3482	0	15	42.221
YHR213W-B	1	19.7	3.96141	0	8	162.282
YJL199C	1	19.7	4.0667	0	10	18.0647
YDR128W	1	20.7	4.96406	0	4	219.986
YML115C	1	20.7	4.01402	0	13	14.1934
YKL188C	1	21.7	9.0405	0	11	33.7191
YLR064W	1	21.7	4.05345	0	12	95.5866
YGR024C	1	22.7	5.07982	0	7	197.097
YJL026W	1	22.7	4.01155	0	10	117.707
YJL196C	1	22.7	4.13663	0	10	20.6384
YMR209C	1	22.7	6.45683	0	13	233.68
YDR492W	1	23.7	7.29553	0	4	444.787
YGR175C	1	24.7	4.2518	0	7	313.905
YNR016C	1	24.7	7.52908	0	14	244.735
YPL231W	1	25.7	4.54845	0	16	31.4739
YAL041W	1	26.7	5.06896	1	1	28.2858
YKL182W	1	30.7	4.33362	0	11	38.2388
YAL026C-A	1	38.2	11.5958	1	1	43.1397
YAL027W	1	41.7	5.00223	1	1	42.6294
YAL021C	1	45.7	5.21207	1	1	51.0173
YGR208W	1	48.7	4.59372	0	7	337.418
YDR203W	1	58.7	5.78678	0	4	265.874
YJR015W	1	59.7	5.97846	0	10	138.853
YAR015W	1	66.3	4.13944	1	1	76.1962
YAR002W	1	66.7	5.72352	1	1	68.4957
YFL020C	1	72.7	9.41518	0	6	47.7785
YLR364W	1	74.7	4.05835	0	12	307.487
YAR023C	1	75.7	12.5707	1	1	80.8982
YAR031W	1	75.7	10.5954	1	1	84.0538
YGL051W	1	78.7	17.3533	0	7	149.387
YAR027W	1	79.7	23.1367	1	1	82.674
YAR033W	1	79.7	18.7616	1	1	84.6258
YAR035W	1	79.7	17.3034	1	1	85.5646
YAR030C	1	80.7	14.7046	1	1	84.0615
YAR029W	1	81.7	19.9522	1	1	83.8221
YAR028W	1	82.7	23.5512	1	1	83.179
YIR019C	1	82.7	5.16122	0	9	177.175
YAL063C	1	87.7	15.2843	0	1	12.5618
YAR047C	1	87.7	19.3434	1	1	90.7818
YAR050W	1	87.7	8.66259	1	1	91.5081
YBL101C	2	10.1	14.8113	1	2	8.45681
YBL105C	2	10.1	6.5591	1	2	5.27572
YBR126C	2	10.1	4.24515	0	2	147.137
YBR139W	2	10.1	4.48209	0	2	154.732
YCL040W	2	10.1	4.65664	0	3	24.3866
YCR105W	2	10.1	6.86668	0	3	148.337
YCR106W	2	10.1	6.14119	0	3	149.243
YCR107W	2	10.1	4.94608	0	3	150.65
YIL111W	2	10.1	4.10459	0	9	69.8279
YMR196W	2	10.1	5.91487	0	13	222.755
YNR014W	2	10.1	4.17634	0	14	241.443
YPL017C	2	10.1	5.35651	0	16	150.841
YBL095W	2	12.1	7.21069	1	2	12.9552
YIL101C	2	12.1	6.14181	0	9	79.7311
YJR079W	2	15.1	4.37157	0	10	174.021
YOR227W	2	17.1	4.70499	0	15	251.747
YHR103W	2	21.1	4.12138	0	8	96.1124
YBL062W	2	22.1	7.59913	1	2	31.6026
YBL071C	2	22.1	4.444	1	2	27.1604
YPL088W	2	24.1	4.5597	0	16	110.804
YBL075C	2	25.1	10.068	1	2	25.933
YDL204W	2	25.1	4.23	0	4	29.3099
YBL058W	2	27.1	4.90691	1	2	33.4446
YBL055C	2	33.1	8.95185	1	2	35.0653
YBL061C	2	34.1	4.86433	1	2	32.2331
YHR030C	2	34.1	4.31753	0	8	51.0697
YKR039W	2	35.1	4.61852	0	11	195.545
YOL152W	2	36.1	4.58678	0	15	13.4025
YBL040C	2	38.1	5.73456	1	2	42.8551
YBL044W	2	39.1	11.6629	1	2	40.8262
YBL043W	2	40.1	10.1857	1	2	41.0336
YBL039W-B	2	42.1	3.98667	1	2	43.0487
YBR021W	2	42.1	4.83696	0	2	84.4369
YGR031C-A	2	55.1	4.13643	0	7	202.531
YBL019W	2	57.1	4.73251	1	2	55.3114
YBL018C	2	58.1	7.51608	1	2	55.909
YDR170W-A	2	61.1	12.7531	0	4	249.023
YBL011W	2	64.1	8.69425	1	2	61.0464
YBL025W	2	64.9	5.19263	1	2	51.4635
YBL017C	2	72.1	4.43694	1	2	57.4727
YBR006W	2	72.1	11.572	1	2	74.0898
YBR012C	2	77.1	11.4143	1	2	77.8619
YBR020W	2	78.1	20.7394	1	2	83.7091
YBR013C	2	83.1	19.5249	1	2	79.7597
YBR022W	2	84.1	4.30462	1	2	85.1266
YBR026C	2	89.1	22.7424	1	2	88.2167
YBR027C	2	92.1	4.14917	1	2	88.318
YBR042C	2	99.1	6.2031	1	2	96.5091
YBR059C	2	99.1	5.26843	1	2	108.077
YKL194C	2	101.1	5.39176	0	11	29.8759
YBR066C	2	102.1	7.36867	1	2	111.219
YBR044C	2	103.4	4.25955	1	2	97.8463
YDR175C	2	103.4	4.1983	0	4	252.421
YDR493W	2	103.4	4.30535	0	4	445.187
YGL068W	2	103.4	4.09311	0	7	138.807
YHR109W	2	103.4	5.6094	0	8	99.0889
YLR069C	2	103.4	4.06946	0	12	98.6358
YLR439W	2	103.4	4.55263	0	12	365.209
YMR287C	2	103.4	4.21536	0	13	287.406
YNL185C	2	103.4	4.62695	0	14	108.282
YPL040C	2	103.4	4.17194	0	16	138.876
YBR061C	2	104.1	4.15829	1	2	109.731
YBR065C	2	107.1	9.5165	1	2	110.914
YOR071C	2	110.1	4.81963	0	15	152.206
YBR062C	2	114.1	4.32796	1	2	109.965
YBR080C	2	116.1	7.60415	1	2	120.242
YBR081C	2	119.1	5.08963	1	2	121.548
YBR072W	2	121.2	5.02384	1	2	114.606
YBR077C	2	121.2	5.70134	1	2	117.673
YMR016C	2	125.1	7.4474	0	13	103.864
YBR082C	2	126.1	4.40986	1	2	122.082
YBR090C	2	126.1	7.20261	1	2	127.939
YPL044C	2	126.1	4.86563	0	16	136.402
YBR107C	2	127.1	26.4444	1	2	136.359
YIL099W	2	128.1	5.08784	0	9	80.0701
YBR087W	2	130.1	12.278	1	2	127.112
YBR103W	2	133.1	22.8215	1	2	134.308
YBR111C	2	134.1	4.68523	1	2	138.565
YBR119W	2	138.1	7.58166	1	2	143.815
YMR041C	2	141.1	4.09391	0	13	119.638
YCL001W-B	2	144.1	4.23592	0	3	54.6056
YBR111W-A	2	146.1	4.30647	1	2	138.645
YBR094W	2	147.1	13.2653	1	2	129.598
YNL270C	2	147.1	4.07983	0	14	50.9569
YBR126W-B	2	149.1	4.58459	1	2	147.298
YBR126W-A	2	150.1	4.25557	1	2	147.275
YBR132C	2	152.1	7.68476	1	2	150.458
YBR137W	2	152.1	8.74409	1	2	153.945
YBR150C	2	155.1	6.95436	1	2	163.372
YML082W	2	156.1	4.26121	0	13	34.6544
YNL256W	2	157.1	5.1992	0	14	60.9226
YLR408C	2	158.8	7.0301	0	12	336.302
YBR149W	2	161.1	11.1824	1	2	162.025
YNR063W	2	162.1	4.14874	0	14	276.349
YBR136W	2	164.1	7.39229	1	2	151.728
YER035W	2	164.1	5.3286	0	5	77.9369
YDL110C	2	165.1	3.9969	0	4	82.1577
YKL008C	2	166.1	6.35493	0	11	162.707
YNL327W	2	166.1	8.58407	0	14	8.89106
YFL021W	2	167.1	5.0991	0	6	46.0367
YJR147W	2	167.1	4.31728	0	10	211.235
YOR316C-A	2	167.1	13.2532	0	15	299.614
YDL049C	2	168.1	4.30477	0	4	113.424
YBR144C	2	169.1	6.45693	1	2	160.101
YBR158W	2	169.1	14.0003	1	2	166.977
YNL066W	2	169.1	9.75007	0	14	186.195
YBR157C	2	170.1	4.4122	1	2	166.307
YER152C	2	170.1	9.08075	0	5	165.909
YMR173W	2	170.1	4.16622	0	13	206.965
YBR151W	2	171.1	18.697	1	2	163.532
YBR210W	2	171.1	4.10565	0	2	193.67
YER153C	2	171.1	4.44389	0	5	166.195
YGL028C	2	171.1	11.6035	0	7	163.897
YHR143W	2	171.1	11.5642	0	8	115.689
YKR100C	2	171.1	4.46318	0	11	243.062
YLR286C	2	171.1	10.5485	0	12	255.634
YLR414C	2	171.1	4.27926	0	12	343.468
YNR067C	2	171.1	10.4378	0	14	280.846
YPR106W	2	171.1	12.2664	0	16	214.653
YBR162W-A	2	172.1	4.89564	1	2	169.572
YER124C	2	172.1	11.8926	0	5	143.202
YGR041W	2	172.1	12.5016	0	7	213.687
YJL078C	2	172.1	10.5053	0	10	88.1709
YOR264W	2	172.1	9.99509	0	15	270.251
YBR214W	2	173.1	4.86774	0	2	195.433
YGR138C	2	173.1	5.14208	0	7	283.293
YKL093W	2	173.1	4.40079	0	11	100.472
YNL328C	2	173.1	4.88309	0	14	8.60507
YPR105C	2	173.1	10.6041	0	16	214.51
YPR156C	2	174.1	4.40452	0	16	243.521
YBR173C	2	175.1	5.03575	1	2	174.637
YBR201W	2	177.1	8.29835	1	2	187.066
YBR193C	2	177.5	4.29774	1	2	182.911
YBR196C-A	2	177.5	9.30752	1	2	184.24
YBR197C	2	177.5	19.5745	1	2	184.745
YGL038C	2	177.5	4.84863	0	7	157.94
YPR054W	2	177.5	5.67498	0	16	193.219
YBR196C-B	2	178.1	7.36904	1	2	184.377
YHR065C	2	180.1	4.16614	0	8	68.7111
YLR353W	2	181.1	4.4595	0	12	300.379
YMR305C	2	182.1	4.44282	0	13	299.294
YBR203W	2	183.1	16.0242	1	2	188.746
YML077W	2	183.1	3.96402	0	13	38.0568
YBR188C	2	184.1	4.13879	1	2	181.214
YBR167C	2	187.1	4.22257	1	2	171.563
YBR176W	2	187.1	4.15838	1	2	175.1
YBR229C	2	189.1	5.87024	1	2	203.789
YBR234C	2	199.1	4.0033	1	2	206.005
YBR215W	2	203.1	3.98401	1	2	196.016
YBR218C	2	203.1	5.6307	1	2	198.689
YBR249C	2	208.1	6.67298	1	2	215.442
YBR252W	2	218.1	5.04759	1	2	216.822
YBR256C	2	220.1	6.40366	1	2	218.464
YBR259W	2	220.1	5.75752	1	2	219.147
YBR255W	2	222.1	7.09724	1	2	217.374
YLR351C	2	222.1	4.21795	0	12	298.941
YBR277C	2	232.1	5.50033	1	2	228.184
YBR297W	2	233.8	6.59438	1	2	240.135
YBR298C	2	233.8	8.27538	1	2	241.321
YCL049C	3	15.9	21.3289	1	3	19.5309
YGR236C	3	15.9	4.10167	0	7	356.258
YEL032W	3	26.9	4.12132	0	5	30.4209
YDR362C	3	27.9	4.42877	0	4	371.587
YNL196C	3	29.9	4.52011	0	14	100.296
YNL123W	3	30.9	4.00138	0	14	146.007
YOR256C	3	30.9	4.10171	0	15	267.549
YML103C	3	32.9	4.42639	0	13	22.9695
YLR144C	3	34.9	6.27966	0	12	155.487
YCL045C	3	35.9	4.55993	1	3	22.4984
YDR135C	3	35.9	4.34841	0	4	225.568
YDL015C	3	36.9	5.15581	0	4	132.371
YJL039C	3	36.9	5.40204	0	10	112.139
YEL053W-A	3	37.9	4.06951	0	5	18.5019
YKR030W	3	37.9	5.50288	0	11	189.933
YDL141W	3	38.9	6.20331	0	4	62.9077
YDR335W	3	38.9	4.4055	0	4	353.791
YIL048W	3	39.9	4.56144	0	9	117.613
YNL114C	3	39.9	5.38428	0	14	152.82
YCL026C-B	3	40.9	9.64803	1	3	35.4998
YDL212W	3	40.9	4.9745	0	4	24.2895
YDR062W	3	40.9	5.3184	0	4	178.693
YCL021W-A	3	41.9	27.4475	1	3	40.125
YGL200C	3	42.9	4.98754	0	7	45.6595
YBL031W	3	43.9	6.39766	0	2	48.5393
YBR221C	3	43.9	4.72696	0	2	199.892
YBR293W	3	43.9	4.09968	0	2	236.08
YCL017C	3	43.9	15.5008	1	3	45.2389
YCL019W	3	43.9	4.87021	1	3	40.8365
YCL024W	3	43.9	5.26298	1	3	37.9848
YDL197C	3	43.9	5.25164	0	4	32.9963
YDR261W-A	3	43.9	4.41354	0	4	304.227
YDR456W	3	43.9	4.14647	0	4	423.929
YEL013W	3	43.9	4.28303	0	5	45.1259
YFL002W-B	3	43.9	4.80424	0	6	66.2995
YFR036W	3	43.9	4.0879	0	6	108.95
YGR282C	3	43.9	5.38635	0	7	391.719
YHR026W	3	43.9	4.65571	0	8	48.2192
YHR064C	3	43.9	5.06751	0	8	68.1439
YJR117W	3	43.9	5.81682	0	10	192.605
YMR088C	3	43.9	4.22217	0	13	151.326
YMR221C	3	43.9	4.35909	0	13	243.233
YOR144C	3	43.9	4.01524	0	15	199.65
YPR034W	3	43.9	4.56825	0	16	185.457
YPR181C	3	43.9	4.01377	0	16	260.923
YPR186C	3	43.9	4.32569	0	16	264.23
YPR198W	3	43.9	4.76168	0	16	270.917
YKL112W	3	44.9	4.72351	0	11	85.937
YLR209C	3	44.9	4.53148	0	12	202.27
YHR025W	3	45.9	4.30785	0	8	47.7984
YBR283C	3	46.9	4.72096	0	2	231.113
YCL012C	3	46.9	6.17823	1	3	48.776
YMR205C	3	46.9	6.04809	0	13	229.434
YBL076C	3	47.9	4.31984	0	2	25.2756
YPL076W	3	48.9	4.42599	0	16	119.029
YKL039W	3	49.9	4.45986	0	11	137.677
YLR459W	3	51.9	4.6717	0	12	380.643
YCL010C	3	52.9	5.58549	1	3	50.0812
YCR014C	3	52.9	12.8524	1	3	67.6546
YEL017C-A	3	52.9	5.16118	0	5	43.0561
YCL004W	3	53.9	13.2774	1	3	52.3655
YCR015C	3	53.9	5.50538	1	3	68.2488
YOR179C	3	54.9	4.48918	0	15	221.889
YCR018C-A	3	57.9	4.01703	1	3	72.9048
YDR233C	3	57.9	5.24403	0	4	288.372
YCR024C-B	3	58.9	6.77385	1	3	78.1875
YLL027W	3	58.9	5.57115	0	12	31.4198
YBR110W	3	60.9	5.45894	0	2	137.664
YGR254W	3	65.9	4.01391	0	7	370.328
YCL067C	3	66.9	6.04977	0	3	6.23122
YCR040W	3	70.9	7.72293	0	3	96.2277
YFL026W	3	70.9	6.86987	0	6	39.6108
YKL178C	3	71.9	7.3088	0	11	43.551
YKL209C	3	71.9	7.61364	0	11	17.6129
YNL145W	3	71.9	7.07833	0	14	130.411
YPL187W	3	71.9	7.96364	0	16	56.1371
YGL089C	3	73.9	7.19732	0	7	127.734
YCR018C	3	74.8	26.5895	1	3	71.4833
YGL033W	3	74.8	4.10351	0	7	161.203
YFL027C	3	74.9	4.63296	0	6	39.2901
YJR004C	3	74.9	6.86766	0	10	133.478
YCR097W	3	75.9	7.25952	0	3	141.024
YCL065W	3	76.9	5.3886	0	3	6.58306
YCL066W	3	76.9	8.01129	0	3	6.35794
YIL015W	3	77.9	6.73172	0	9	145.079
YCR020C-A	3	78.9	4.51866	1	3	74.4584
YGL032C	3	78.9	6.19076	0	7	161.649
YNL146C-A	3	78.9	6.36303	0	14	130.103
YJL170C	3	79.9	5.04005	0	10	30.5308
YLR040C	3	80.9	5.73828	0	12	82.6517
YCR097W-A	3	82.9	8.19961	0	3	141.314
YCR023C	3	87.9	4.21974	1	3	76.9911
YCR041W	3	87.9	4.57899	1	3	96.4528
YPL136W	3	87.9	5.3125	0	16	85.948
YCR043C	3	90.9	5.28611	1	3	99.2052
YPR080W	3	90.9	4.08318	0	16	203.186
YCR052W	3	97.9	11.1315	1	3	103.214
YBL103C	3	102.9	4.52447	0	2	7.02752
YFL057C	3	119.9	3.96961	0	6	7.05122
YCR093W	3	121.9	4.46925	1	3	134.442
YCR095C	3	126.9	4.96581	1	3	138.827
YCR072C	3	128.9	4.7192	1	3	116.334
YCR106W	3	128.9	6.80995	0	3	149.243
YCR107W	3	128.9	8.07648	0	3	150.65
YOL165C	3	131.9	4.97411	0	15	0.636146
YCR087C-A	3	137	9.36755	1	3	126.938
YCR087W	3	137	4.301	1	3	126.703
YCR099C	3	137	23.2646	1	3	144.607
YCR100C	3	137	25.7488	1	3	145.049
YCR101C	3	137	33.4677	1	3	145.438
YJR112W-A	3	137	3.99401	0	10	191.336
YDL231C	4	9.3	12.3845	1	4	13.0582
YBR112C	4	14.3	4.02619	0	2	139.737
YHR099W	4	14.3	4.31641	0	8	90.803
YDL102W	4	15.3	4.59316	0	4	85.8507
YDL233W	4	15.3	5.76734	1	4	11.3673
YEL022W	4	17.3	4.29269	0	5	39.0161
YGR044C	4	19.3	5.42794	0	7	216.051
YCR101C	4	20.3	4.2433	0	3	145.438
YHR210C	4	22.3	5.21009	0	8	156.561
YDL207W	4	24.3	5.68161	1	4	27.3384
YCR099C	4	25.3	4.449	0	3	144.607
YDL204W	4	25.3	4.5129	1	4	29.3099
YER087C-A	4	25.3	3.97356	0	5	116.343
YCR100C	4	27.7	4.4883	0	3	145.049
YDL214C	4	27.7	6.93545	1	4	23.7056
YDL247W	4	27.7	4.43735	0	4	1.81213
YJR160C	4	27.7	4.35407	0	10	221.913
YDL152W	4	38.3	4.19524	1	4	56.6485
YNL017C	4	40.3	4.96899	0	14	222.91
YLR413W	4	50.3	5.30184	0	12	342.391
YDL155W	4	52.3	3.99203	1	4	54.7757
YDL193W	4	52.3	4.61598	1	4	35.5321
YKL001C	4	53.3	4.17006	0	11	166.816
YDR253C	4	54.3	4.07461	0	4	298.982
YFR030W	4	55.3	4.61947	0	6	102.385
YJR010W	4	55.3	4.03008	0	10	136.902
YJR137C	4	55.3	4.75101	0	10	204.977
YNL277W	4	55.3	4.41433	0	14	43.4488
YDL168W	4	56.3	5.23805	1	4	49.4601
YGR055W	4	56.3	4.02956	0	7	221.78
YMR157C	4	56.3	5.28944	0	13	194.493
YBR294W	4	61.3	4.13908	0	2	236.749
YDR096W	4	61.3	4.46214	0	4	197.531
YDL124W	4	66.6	15.7939	1	4	74.4703
YDL132W	4	66.6	13.6749	1	4	69.5057
YEL024W	4	66.6	5.13116	0	5	37.5554
YHR094C	4	66.6	9.39664	0	8	87.7544
YOR065W	4	66.6	5.09149	0	15	147.632
YPR010C-A	4	67.3	4.50656	0	16	168.929
YBL045C	4	68.3	4.21119	0	2	40.6814
YLL041C	4	68.3	4.27374	0	12	19.3719
YKL109W	4	69.3	3.99021	0	11	88.0883
YDL133W	4	71.3	4.91877	1	4	68.9216
YER028C	4	71.3	10.1897	0	5	74.168
YPR191W	4	71.3	4.55419	0	16	266.664
YDR529C	4	73.3	5.06861	0	4	463.911
YDL103C	4	77.3	6.78331	1	4	85.7607
YDL088C	4	78.3	6.21138	1	4	93.0055
YDL109C	4	79.3	7.76368	1	4	82.8537
YMR280C	4	88.3	4.23252	0	13	282.63
YDL181W	4	89.3	4.3991	0	4	41.8908
YDL089W	4	90.3	5.69956	1	4	92.0209
YJR121W	4	90.3	5.26651	0	10	194.29
YKL085W	4	90.3	4.49426	0	11	105.924
YBL030C	4	91.3	4.18514	0	2	49.2263
YFR014C	4	91.3	4.46647	0	6	83.421
YGL187C	4	91.3	4.62885	0	7	55.5969
YHR176W	4	91.3	4.6502	0	8	136.274
YIL031W	4	91.3	5.13095	0	9	131.674
YJR077C	4	91.3	4.57098	0	10	173.418
YML120C	4	91.3	6.54893	0	13	10.1087
YNL052W	4	91.3	5.34438	0	14	197.173
YBL099W	4	92.3	4.23458	0	2	11.0842
YDR119W-A	4	92.3	4.49222	0	4	214.239
YKL148C	4	93.3	5.92764	0	11	65.0291
YPL068C	4	93.3	4.31268	0	16	123.26
YMR145C	4	94.3	4.32271	0	13	189.209
YDL059C	4	96.3	5.12574	1	4	106.922
YDL076C	4	100.3	5.65018	1	4	99.6708
YDL079C	4	102.3	7.86886	1	4	97.3485
YDL037C	4	123.3	4.65277	1	4	119.551
YDL039C	4	123.3	4.13393	1	4	119.083
YOR053W	4	123.3	5.46267	0	15	141.159
YNR003W-A	4	124.3	7.20652	0	14	234.764
YDL033C	4	125.3	4.50383	1	4	122.139
YDL035C	4	133.3	4.6926	1	4	121.562
YDL070W	4	135.3	3.99391	0	4	102.601
YDL008W	4	136.3	18.2352	1	4	134.403
YDL012C	4	137.3	11.9613	1	4	133.749
YDL034W	4	141.7	5.18761	0	4	121.477
YDR031W	4	141.7	6.48289	1	4	156.112
YFL021C-A	4	141.7	5.04394	0	6	46.3482
YDR030C	4	144.3	4.22454	1	4	156.043
YDR001C	4	147.3	6.77893	1	4	140.277
YNR050C	4	148.3	5.45425	0	14	264.692
YDR033W	4	149.3	11.4828	1	4	157.556
YDL131W	4	150.3	3.99093	0	4	70.4669
YDL187C	4	150.3	4.00202	0	4	38.9944
YDR034C	4	153.3	5.77908	1	4	158.786
YBR107C	4	156.3	4.59249	0	2	136.359
YEL071W	4	156.3	4.13276	0	5	5.7045
YDR038C	4	158.3	21.4849	1	4	164.556
YDR039C	4	158.3	27.1883	1	4	165.762
YDR036C	4	159.3	31.5676	1	4	162.698
YDR037W	4	160.3	23.7246	1	4	162.924
YDR034W-B	4	161.3	4.93806	1	4	161.643
YDR042C	4	164.3	10.0308	1	4	167.807
YIL074C	4	167.3	5.68939	0	9	100.072
YLR364W	4	170.3	4.65213	0	12	307.487
YIL051C	4	171.3	4.28247	0	9	116.192
YLR142W	4	171.3	5.6677	0	12	153.034
YCL064C	4	173.3	4.38485	0	3	8.08501
YDR040C	4	174.3	4.48947	1	4	166.963
YDR090C	4	175.3	5.84056	1	4	194.069
YDR058C	4	179.3	11.5075	1	4	176.295
YAR028W	4	180.9	4.40168	0	1	83.179
YAR033W	4	180.9	4.63094	0	1	84.6258
YAR035W	4	180.9	4.88453	0	1	85.5646
YDR075W	4	180.9	5.61386	1	4	185.105
YDR079C-A	4	180.9	4.40667	1	4	187.174
YDR089W	4	180.9	4.99883	1	4	192.861
YHR182C-A	4	191.3	5.15648	0	8	141.42
YJL026C-A	4	198.7	4.79725	0	10	117.971
YGR024C	4	206.3	4.143	0	7	197.097
YDR106W	4	207.3	6.09794	1	4	206.794
YDR118W-A	4	209.3	19.8562	1	4	213.232
YDR124W	4	212.3	5.67793	1	4	217.123
YDR126W	4	216.3	16.9087	1	4	218.028
YDR128W	4	218.3	16.3766	1	4	219.986
YDR134C	4	227.3	9.31254	1	4	223.686
YOL089C	4	236.7	3.96683	0	15	50.6557
YDR143C	4	242.3	4.34175	1	4	230.629
YJR069C	4	254.3	5.11672	0	10	170.787
YDL221W	4	255.7	4.81865	0	4	19.1941
YDR173C	4	255.7	5.7022	1	4	251.639
YDR182W-A	4	255.7	11.0095	1	4	257.065
YDR177W	4	257.3	8.11117	1	4	253.266
YDR197W	4	265.3	12.0517	1	4	263.881
YDR196C	4	267.3	4.13436	1	4	263.811
YKR027W	4	274	4.57834	0	11	186.547
YDR217C	4	280.3	7.36375	1	4	280.038
YGR219W	4	282.3	4.50146	0	7	346.372
YDR223W	4	283.3	5.36167	1	4	282.711
YDR273W	4	284.3	4.72646	0	4	313.14
YNL214W	4	290.3	4.51943	0	14	90.8546
YDR265W	4	291.3	10.1307	1	4	309.629
YDR235W	4	299.3	7.29756	1	4	289.348
YIL118W	4	303.3	5.85771	0	9	62.8622
YDR264C	4	304.3	19.4165	1	4	309.461
YPL119C-A	4	305.3	4.44098	0	16	94.0894
YPL130W	4	305.3	4.99195	0	16	88.3034
YDR262W	4	307.3	19.6362	1	4	307.85
YDR263C	4	308.3	25.7618	1	4	308.595
YDR260C	4	309.3	9.05232	1	4	302.913
YDR272W	4	310.3	19.4498	1	4	312.778
YGL251C	4	311.3	4.65871	0	7	11.614
YDR136C	4	314.5	4.21695	0	4	225.795
YDR268W	4	316.3	5.74574	1	4	311.224
YLR125W	4	320.3	4.09654	0	12	141.647
YDR288W	4	321.3	15.7841	1	4	321.503
YER038C	4	322.3	4.45185	0	5	79.9025
YDR286C	4	324.3	6.44057	1	4	321.002
YBL061C	4	326.3	3.96567	0	2	32.2331
YHR192W	4	327.3	4.17709	0	8	146.058
YOR297C	4	327.3	4.26304	0	15	288.856
YDR292C	4	328.3	4.54283	1	4	323.921
YDR294C	4	328.3	12.1397	1	4	326.154
YOR260W	4	328.3	4.00997	0	15	268.639
YDR309C	4	329.3	4.08842	1	4	334.827
YMR310C	4	330.3	4.57734	0	13	304.891
YDR304C	4	331.6	5.17137	1	4	332.448
YDR315C	4	333.3	5.66022	1	4	338.995
YDR320C	4	342.3	11.6762	1	4	343.514
YDR325W	4	343.3	3.98912	1	4	346.324
YDR317W	4	345.3	12.0969	1	4	341.672
YDR328C	4	345.3	4.95587	1	4	349.092
YDR339C	4	359.3	7.92168	1	4	356.683
YDR364C	4	365.3	10.1418	1	4	373.298
YDR366C	4	367.3	7.22531	1	4	375.973
YDR367W	4	368.3	13.8028	1	4	375.977
YDR357C	4	368.7	13.5508	1	4	368.756
YBR167C	4	373.3	4.86304	0	2	171.563
YDR362C	4	375.3	5.33683	1	4	371.587
YDR373W	4	376.3	12.9115	1	4	379.052
YHR020W	4	376.3	4.12461	0	8	43.1771
YCR095C	4	377.3	4.45142	0	3	138.827
YCR106W	4	377.3	4.79245	0	3	149.243
YCR107W	4	377.3	4.63758	0	3	150.65
YDR374W-A	4	378.3	5.63913	1	4	379.671
YOR294W	4	378.3	4.05233	0	15	286.556
YDR391C	4	379.3	7.61989	1	4	390.001
YER140W	4	379.3	4.01617	0	5	158.077
YML108W	4	379.3	4.14112	0	13	18.6228
YOL115W	4	379.3	4.16199	0	15	33.4927
YBL078C	4	380.3	4.00624	0	2	24.2142
YDR363W	4	380.3	5.69115	1	4	371.738
YBL079W	4	381.3	4.286	0	2	22.5692
YDR365C	4	382.3	4.60023	1	4	373.972
YDR397C	4	385.3	5.34605	1	4	392.696
YGR238C	4	390.5	4.47192	0	7	358.425
YKL121W	4	390.5	4.75115	0	11	81.2106
YDR400W	4	392.3	8.69019	1	4	394.024
YOL154W	4	392.3	4.17676	0	15	11.3884
YFR055W	4	393.3	4.2402	0	6	126.839
YPR190C	4	395.3	4.531	0	16	266.565
YDR414C	4	396.3	4.01813	1	4	401.947
YDR449C	4	396.3	4.21276	0	4	421.259
YPL031C	4	396.3	4.39744	0	16	142.913
YPL072W	4	396.3	4.03332	0	16	121.359
YER039C	4	397.3	4.32676	0	5	80.2362
YJR002W	4	397.3	4.24097	0	10	131.673
YDR402C	4	399.3	10.95	1	4	394.84
YDR411C	4	402.3	8.48418	1	4	401.238
YDR416W	4	404.3	6.2971	1	4	402.486
YDR423C	4	407.9	27.4424	1	4	408.937
YDR443C	4	415.3	7.65642	1	4	418.472
YDR441C	4	417.3	8.92362	1	4	416.956
YDR444W	4	418.3	3.9667	1	4	418.581
YOR342C	4	418.3	4.12543	0	15	319.317
YDR440W	4	419.3	7.90105	1	4	416.157
YEL032W	4	419.3	4.93783	0	5	30.4209
YDR461C-A	4	422.3	4.3138	1	4	429.589
YLR274W	4	425.3	5.64809	0	12	248.927
YDR452W	4	425.4	15.0628	1	4	422.496
YDR469W	4	425.4	4.83263	1	4	433.685
YDR451C	4	427.3	10.9067	1	4	422.279
YDR453C	4	429.3	7.89584	1	4	423.362
YDR490C	4	431.3	5.79953	1	4	444.585
YER178W	4	434.3	3.99695	0	5	191.353
YIL122W	4	434.3	5.20669	0	9	58.7451
YPL280W	4	436.3	5.32372	0	16	3.42924
YMR322C	4	437.3	4.47828	0	13	312.512
YDR514C	4	439.3	4.7908	1	4	456.601
YDR497C	4	446.2	5.84893	1	4	448.054
YDR523C	4	449.3	7.53005	1	4	460.959
YMR075C-A	4	453.3	4.12826	0	13	141.437
YDR524C	4	456.3	4.99207	1	4	461.564
YDR530C	4	462.3	4.18996	1	4	464.289
YDR531W	4	463.3	15.4692	1	4	464.433
YBL111C	4	464.6	4.03603	0	2	1.20149
YBL113C	4	464.6	4.4886	0	2	0.764066
YDR538W	4	464.6	4.52174	1	4	468.361
YDR539W	4	464.6	18.6947	1	4	468.73
YDR540C	4	464.6	4.95741	1	4	470.459
YDR545W	4	464.6	4.19062	1	4	473.139
YEL075W-A	4	464.6	4.07632	0	5	1.68499
YEL077C	4	464.6	4.18686	0	5	1.41446
YFL066C	4	464.6	3.993	0	6	1.21715
YIL177C	4	464.6	4.06502	0	9	2.05285
YJL225C	4	464.6	4.12869	0	10	1.40605
YLL066C	4	464.6	4.21928	0	12	3.35931
YLL067C	4	464.6	4.44252	0	12	1.36647
YLR463C	4	464.6	4.9059	0	12	384.057
YLR465C	4	464.6	4.84895	0	12	384.25
YLR466C-B	4	464.6	7.66308	0	12	385.819
YLR466W	4	464.6	4.47739	0	12	384.154
YLR467W	4	464.6	4.51926	0	12	386.106
YML133C	4	464.6	4.32021	0	13	1.26074
YNL339C	4	464.6	4.17425	0	14	2.1885
YOR396W	4	464.6	4.21145	0	15	358.197
YPL283C	4	464.6	4.31217	0	16	1.67518
YPR204W	4	464.6	4.10915	0	16	273.983
YEL057C	5	10.6	15.1163	1	5	15.9851
YHR043C	5	21.6	5.80911	0	8	58.0511
YEL052W	5	23.6	7.57589	1	5	19.7846
YEL041W	5	28.6	4.00906	1	5	26.5688
YEL042W	5	28.6	5.38563	1	5	25.8078
YEL040W	5	29.4	7.83742	1	5	27.3073
YJL130C	5	29.4	4.1575	0	10	51.7415
YEL037C	5	29.6	4.85744	1	5	28.9006
YBL042C	5	30.6	12.9818	0	2	42.1071
YCR094W	5	30.6	4.0941	0	3	137.629
YNL065W	5	31.6	12.1995	0	14	187.041
YNL018C	5	32.6	4.74632	0	14	222.649
YLR420W	5	34.6	20.2956	0	12	346.941
YNL034W	5	34.6	4.04928	0	14	211.037
YKL216W	5	35.6	25.5473	0	11	9.62085
YDL048C	5	36.6	6.06503	0	4	114.151
YEL021W	5	36.6	15.789	1	5	40.6823
YEL038W	5	36.6	8.04834	1	5	28.1509
YMR043W	5	36.6	4.91479	0	13	120.283
YOL143C	5	36.6	24.3063	0	15	18.1558
YER088C	5	37.6	7.66457	0	5	117.328
YGL004C	5	37.6	4.85199	0	7	182.058
YHR092C	5	37.6	5.13483	0	8	86.6072
YMR008C	5	37.6	4.15808	0	13	96.0385
YOL126C	5	37.6	23.8963	0	15	27.366
YBL029W	5	38.6	5.74616	0	2	49.8651
YEL018W	5	38.6	5.64157	1	5	42.5443
YGR052W	5	38.6	5.72573	0	7	219.632
YOR092W	5	38.6	4.12876	0	15	163.407
YEL006W	5	39.6	7.57215	1	5	50.5614
YEL053C	5	39.6	5.36033	1	5	19.6204
YKL195W	5	39.6	4.70261	0	11	28.8052
YDR055W	5	40.6	4.81853	0	4	174.698
YEL004W	5	40.6	6.22219	1	5	51.478
YNR067C	5	40.6	4.84382	0	14	280.846
YEL001C	5	41.6	7.88041	1	5	52.8847
YJL112W	5	44.6	4.68686	0	10	61.6023
YDR261C	5	46.6	5.16675	0	4	303.528
YKL155C	5	46.6	4.15932	0	11	61.317
YPR159W	5	46.6	4.22382	0	16	248.669
YDL022W	5	52.6	4.4596	0	4	127.695
YPR196W	5	52.6	7.97743	0	16	270.146
YGR138C	5	53.6	5.12232	0	7	283.293
YLR228C	5	56.6	4.75263	0	12	216.898
YDR144C	5	57.6	4.77879	0	4	231.32
YBR054W	5	58.6	7.90563	0	2	102.968
YMR031C	5	58.6	4.45266	0	13	113.778
YNL160W	5	58.6	4.64008	0	14	124.562
YHR087W	5	59.6	4.20298	0	8	84.2035
YGR244C	5	62.6	4.76225	0	7	362.349
YER044C	5	67.6	4.84572	1	5	83.3215
YJL003W	5	69.8	3.99001	0	10	129.801
YJL197C-A	5	70.6	4.52555	0	10	19.8316
YER034W	5	77.6	7.73061	1	5	77.6593
YBR133C	5	82.6	4.00692	0	2	151.313
YER051W	5	87.6	5.45573	1	5	89.1484
YER041W	5	88.6	7.52596	1	5	81.3763
YER054C	5	95.6	9.46833	1	5	92.3147
YER055C	5	95.6	4.87813	1	5	93.0456
YNR057C	5	96.6	4.51065	0	14	271.592
YCL030C	5	97.6	3.99914	0	3	32.7858
YDR222W	5	97.6	4.32907	0	4	282.077
YER065C	5	99.6	7.48982	1	5	100.444
YER024W	5	100.6	5.99941	0	5	70.777
YFR025C	5	100.6	4.39019	0	6	98.2672
YBR248C	5	101.6	5.9029	0	2	214.983
YNL030W	5	103.6	4.57916	0	14	213.354
YBL043W	5	104.6	4.94912	0	2	41.0336
YBR084C-A	5	104.6	3.97577	0	2	124.404
YLR443W	5	104.6	4.4631	0	12	368.14
YER080W	5	105.6	7.77052	1	5	112.009
YER059W	5	106.6	7.72667	1	5	95.4401
YKR050W	5	106.6	4.30405	0	11	200.39
YBR010W	5	107.6	4.27152	0	2	76.8897
YER077C	5	108.8	4.39925	1	5	110.834
YOR321W	5	108.8	4.15304	0	15	302.285
YER076C	5	109.6	6.52687	1	5	109.751
YLR084C	5	109.6	4.6289	0	12	108.125
YOR171C	5	109.6	4.80697	0	15	215.761
YOR230W	5	109.6	5.15345	0	15	254.38
YEL047C	5	110.6	4.11966	0	5	23.3656
YDL093W	5	111.6	4.58056	0	4	89.8833
YHR142W	5	111.6	5.5778	0	8	115.096
YOL105C	5	111.6	6.19068	0	15	38.2234
YDL035C	5	113.6	4.79767	0	4	121.562
YKL008C	5	113.6	4.24948	0	11	162.707
YDR518W	5	114.6	6.2533	0	4	458.342
YNL169C	5	114.6	4.85741	0	14	117.571
YNL100W	5	115.6	4.15908	0	14	161.927
YDR463W	5	116.6	9.68992	0	4	429.914
YGR288W	5	116.6	4.33258	0	7	395.999
YJR153W	5	116.6	6.32971	0	10	216.815
YLR437C	5	116.6	4.60632	0	12	364.32
YMR177W	5	116.6	4.70059	0	13	209.649
YPL113C	5	116.6	5.13535	0	16	97.8167
YDR216W	5	117.6	8.61791	0	4	277.42
YDR232W	5	117.6	4.28005	0	4	287.471
YDR031W	5	118.6	4.09552	0	4	156.112
YFR018C	5	118.6	4.92228	0	6	88.3944
YGL056C	5	118.6	4.57919	0	7	147.143
YIL114C	5	118.6	7.6806	0	9	67.472
YPR134W	5	118.6	4.63803	0	16	231.452
YDR044W	5	119.6	5.24912	0	4	169.486
YGR088W	5	119.6	5.06757	0	7	242.185
YMR042W	5	119.6	4.38929	0	13	119.852
YMR070W	5	119.6	5.74704	0	13	139.088
YOR215C	5	119.6	7.65296	0	15	246.616
YDR258C	5	120.6	5.28571	0	4	301.986
YMR280C	5	120.6	5.03309	0	13	282.63
YBR085W	5	121.6	6.96852	0	2	124.773
YBR201C-A	5	121.6	6.81594	0	2	187.403
YBR238C	5	121.6	10.7913	0	2	209.224
YLR312C	5	121.6	6.48354	0	12	273.194
YLR408C	5	121.6	7.5685	0	12	336.302
YMR011W	5	121.6	6.51539	0	13	97.9071
YNR073C	5	121.6	5.44603	0	14	287.21
YOR044W	5	121.6	4.22523	0	15	136.272
YDL049C	5	122.6	8.19022	0	4	113.424
YDL245C	5	122.6	4.27019	0	4	4.09852
YEL070W	5	122.6	5.11992	0	5	6.83633
YOR010C	5	122.6	5.79972	0	15	114.481
YOR313C	5	122.6	4.18189	0	15	297.945
YOR317W	5	122.6	5.13655	0	15	300.079
YOR356W	5	122.6	5.25769	0	15	332.394
YGR230W	5	123.6	5.46238	0	7	352.226
YJL198W	5	123.6	5.29076	0	10	18.2628
YKL093W	5	123.6	6.17638	0	11	100.472
YMR145C	5	123.6	4.61093	0	13	189.209
YBL029C-A	5	124.6	8.47933	0	2	49.458
YDL037C	5	124.6	8.62795	0	4	119.551
YDL039C	5	124.6	8.08731	0	4	119.083
YDR213W	5	124.6	4.64731	0	4	275.782
YDR380W	5	124.6	4.17032	0	4	382.606
YER064C	5	124.6	5.7828	0	5	99.5016
YHR094C	5	124.6	4.25631	0	8	87.7544
YLL012W	5	124.6	6.2629	0	12	45.1446
YOR062C	5	124.6	4.5904	0	15	146.342
YOR229W	5	124.6	4.02768	0	15	253.59
YBR001C	5	125.6	9.0182	0	2	72.3687
YDR277C	5	125.6	5.5179	0	4	314.854
YGL017W	5	125.6	4.62224	0	7	170.166
YGL248W	5	125.6	6.05542	0	7	13.1814
YMR135C	5	125.6	8.43347	0	13	183.637
YPR155C	5	125.6	5.48656	0	16	242.838
YER037W	5	126.6	4.38072	0	5	79.075
YGL087C	5	126.6	4.2341	0	7	128.346
YGR213C	5	126.6	5.52114	0	7	340.229
YIL011W	5	126.6	9.51379	0	9	150.216
YPR149W	5	127.6	6.60012	0	16	240.672
YDR079W	5	128.6	4.20612	0	4	186.941
YER107C	5	128.6	9.8076	1	5	131.08
YKR098C	5	128.6	8.35124	0	11	241.242
YNR009W	5	128.6	5.80384	0	14	237.831
YOR330C	5	128.6	4.85728	0	15	311.31
YIL013C	5	129.6	7.19433	0	9	149.637
YFL051C	5	130.6	15.7451	0	6	14.6281
YHR049W	5	130.6	5.97155	0	8	61.9379
YDL066W	5	130.7	4.21216	0	4	103.779
YDR259C	5	130.7	11.3216	0	4	302.464
YER097W	5	130.7	19.3433	1	5	124.299
YFR006W	5	130.7	4.4055	0	6	74.9061
YGR249W	5	130.7	5.50822	0	7	365.571
YIR019C	5	130.7	13.3545	0	9	177.175
YLR328W	5	130.7	4.89091	0	12	282.573
YMR173W	5	130.7	5.39889	0	13	206.965
YMR173W-A	5	130.7	4.34349	0	13	207.036
YNL179C	5	130.7	4.13236	0	14	111.415
YPL026C	5	130.7	3.98756	0	16	145.602
YPL177C	5	130.7	4.05836	0	16	62.0274
YPR009W	5	130.7	5.58802	0	16	167.187
YPR015C	5	130.7	4.48311	0	16	171.386
YHR047C	5	131.6	4.19209	0	8	60.3876
YPR091C	5	131.6	7.45195	0	16	208.38
YDR046C	5	132.6	4.83582	0	4	170.7
YJL164C	5	132.6	4.52561	0	10	33.3541
YMR036C	5	132.6	4.68226	0	13	116.763
YNL234W	5	132.6	8.59984	0	14	77.7808
YPR013C	5	132.6	19.1898	0	16	169.808
YBR269C	5	133.6	5.17165	0	2	222.791
YER115C	5	133.6	11.3599	1	5	138.217
YGL208W	5	133.6	6.14218	0	7	36.0537
YJR148W	5	133.6	6.98506	0	10	211.699
YLR015W	5	133.6	4.55768	0	12	63.0524
YMR265C	5	133.6	6.8711	0	13	271.259
YOL048C	5	133.6	9.8636	0	15	79.4881
YOR049C	5	133.6	3.99611	0	15	139.811
YBR230C	5	134.6	6.45511	0	2	204.006
YER105C	5	134.6	6.79113	1	5	130.193
YOL151W	5	134.6	10.8945	0	15	14.378
YBR177C	5	135.6	8.77973	0	2	175.83
YER116C	5	135.6	5.06878	1	5	138.675
YKL091C	5	135.6	5.37851	0	11	102.701
YPR127W	5	135.6	9.8476	0	16	229.143
YCL047C	5	136.6	4.56736	0	3	21.3135
YCR051W	5	136.6	4.70992	0	3	102.771
YER114C	5	136.6	6.27089	1	5	137.811
YKL036C	5	136.6	4.55991	0	11	140.452
YKR102W	5	136.6	5.44837	0	11	245.489
YDR350C	5	137.6	7.44719	0	4	365.233
YER093C	5	137.6	5.13703	1	5	121.669
YGR274C	5	138.6	4.34556	0	7	385.935
YJL132W	5	138.6	5.59994	0	10	48.6121
YHL025W	5	139.6	3.97846	0	8	16.4471
YNR070W	5	139.6	4.55883	0	14	283.168
YDL027C	5	140.6	4.06674	0	4	125.569
YFL050C	5	140.6	4.72356	0	6	17.1773
YDR507C	5	148.5	4.22621	0	4	454.362
YER139C	5	148.5	17.4363	1	5	157.964
YJR147W	5	148.5	4.06013	0	10	211.235
YOL160W	5	148.5	4.73951	0	15	4.67383
YER132C	5	149.6	7.36431	1	5	150.701
YPR140W	5	158.6	4.88513	0	16	236.185
YER150W	5	167.6	4.56423	1	5	163.947
YJL218W	5	169	4.56497	0	10	6.62223
YJL216C	5	170.6	4.09197	0	10	7.85579
YJL217W	5	170.6	5.7469	0	10	6.97014
YER158C	5	171.6	8.79941	1	5	171.705
YER163C	5	176.6	5.40666	1	5	176.318
YJL019W	5	177.6	4.31493	0	10	120.85
YER183C	5	182.6	4.00523	1	5	193.856
YFL063W	5	186.6	4.25675	0	6	2.39424
YER188C-A	5	187.6	5.80008	1	5	199.434
YDR423C	5	188.6	4.08861	0	4	408.937
YDR543C	5	189.6	6.92998	0	4	472.709
YPL148C	5	189.6	4.1161	0	16	79.1237
YAL068W-A	5	190.6	7.56168	0	1	0.217101
YDR544C	5	190.6	7.45764	0	4	472.892
YAL069W	5	190.9	11.1247	0	1	0.125745
YCR108C	5	190.9	8.67903	0	3	151.753
YDR288W	5	190.9	4.17614	0	4	321.503
YER186C	5	190.9	9.06881	1	5	196.886
YER187W	5	190.9	11.4882	1	5	198.147
YER188W	5	190.9	13.8078	1	5	198.781
YJL194W	5	190.9	5.04007	0	10	20.8048
YLL065W	5	190.9	12.441	0	12	4.17877
YNL337W	5	190.9	14.898	0	14	2.64505
YFL057C	6	19.3	9.43765	1	6	7.05122
YJL214W	6	19.3	28.7575	0	10	8.09603
YOR298W	6	19.3	4.16893	0	15	288.948
YFL056C	6	20.3	16.5226	1	6	7.37203
YLR317W	6	20.3	3.96604	0	12	275.647
YDR373W	6	21.3	4.57269	0	4	379.052
YFL053W	6	22.3	8.98535	1	6	11.2102
YOR324C	6	26.3	5.28006	0	15	305.257
YFL052W	6	27.3	7.32631	1	6	13.5197
YFL054C	6	27.3	12.6255	1	6	10.9047
YFL055W	6	28.3	7.5742	0	6	8.12746
YHR213W-B	6	28.3	8.40933	0	8	162.282
YIL033C	6	28.3	4.70944	0	9	131.239
YAR064W	6	30.3	7.61864	0	1	99.0664
YHR213W-A	6	30.3	9.91271	0	8	162.207
YNL125C	6	32.3	4.57908	0	14	145.073
YOR349W	6	32.3	4.02982	0	15	326.642
YIL014W	6	36.3	4.1973	0	9	146.776
YFL009W	6	39.3	4.82631	1	6	55.7164
YIL014C-A	6	39.3	4.50609	0	9	146.516
YFL028C	6	40.3	5.06221	1	6	38.4745
YFL021W	6	44.3	7.49374	1	6	46.0367
YFL027C	6	44.3	4.32401	1	6	39.2901
YFL022C	6	50.3	6.44293	1	6	45.5777
YFL017W-A	6	53.3	5.37146	1	6	49.7455
YGR154C	6	54.3	4.08048	0	7	295.201
YGR131W	6	60.3	4.61862	0	7	279.277
YFL010C	6	67.3	13.9427	1	6	55.5235
YFL001W	6	70.3	5.52725	1	6	70.5822
YFL013C	6	72.3	6.09971	1	6	52.7348
YDL032W	6	79.8	4.00766	0	4	122.07
YGL219C	6	79.8	4.07655	0	7	31.2047
YDR169C	6	82.3	4.60188	0	4	246.138
YFR012W	6	83.3	6.21537	1	6	80.5411
YFR016C	6	84.3	6.8853	1	6	86.7232
YCL007C	6	85.3	4.05886	0	3	51.5301
YFR018C	6	85.3	5.33081	1	6	88.3944
YFR020W	6	93.3	4.97694	1	6	92.4902
YFR026C	6	99.3	5.96707	1	6	98.992
YGL249W	6	99.3	4.16176	0	7	12.234
YAL068C	6	110.3	4.19301	0	1	0.951098
YFR055W	6	110.3	8.61614	1	6	126.839
YEL049W	6	111.8	4.9432	0	5	22.2909
YFR042W	6	111.8	5.21779	1	6	114.475
YFR054C	6	111.8	9.92906	1	6	124.548
YGL261C	6	111.8	6.03844	0	7	2.44365
YHL046C	6	111.8	5.43935	0	8	3.65571
YOR283W	6	111.8	4.68182	0	15	279.673
YPR062W	6	111.8	4.01398	0	16	196.377
YGL252C	7	9.9	9.33561	1	7	10.1522
YGL249W	7	14.9	4.249	1	7	12.234
YGL235W	7	17.9	4.05843	1	7	20.4593
YGL241W	7	17.9	4.54072	1	7	16.8126
YLL066W-B	7	20.9	10.0801	0	12	1.97494
YHR217C	7	21.9	11.9429	0	8	167.157
YNL338W	7	21.9	10.5276	0	14	2.42158
YGL226W	7	22.9	4.89753	1	7	27.1564
YGL216W	7	24.9	12.2597	1	7	31.4376
YGL208W	7	34.6	8.54347	1	7	36.0537
YMR150C	7	34.6	4.1038	0	13	191.264
YGL211W	7	39.9	5.82386	1	7	34.2677
YOR285W	7	39.9	4.90793	0	15	280.392
YJR119C	7	40.9	6.37565	0	10	193.953
YGL194C-A	7	42.9	7.18974	1	7	51.8211
YIL087C	7	45.9	5.92095	0	9	90.0124
YOR119C	7	45.9	4.5552	0	15	181.577
YGL204C	7	46.9	10.1487	1	7	41.4792
YFR017C	7	49.9	4.63281	0	6	87.7399
YGL169W	7	49.9	5.75568	1	7	68.8557
YKR099W	7	52.9	4.43188	0	11	241.498
YGL158W	7	55.9	4.6811	0	7	76.6042
YGL179C	7	56.9	15.738	1	7	61.1091
YJL210W	7	56.9	4.21067	0	10	11.1033
YCR057C	7	58.9	4.31119	0	3	107.164
YIL143C	7	58.9	6.62232	0	9	37.3301
YGL170C	7	61.9	8.46628	1	7	68.6101
YGL162W	7	64.9	5.49148	1	7	73.3183
YNL124W	7	65.9	5.2727	0	14	145.342
YGL159W	7	66.9	14.1273	1	7	75.0115
YGL150C	7	71.9	8.17592	1	7	83.4651
YGL136C	7	83.9	8.46442	1	7	93.9382
YOL124C	7	86.9	4.19003	0	15	28.635
YML057W	7	87.9	4.53151	0	13	54.4716
YGL155W	7	88.9	8.01294	1	7	79.2101
YML043C	7	88.9	4.30128	0	13	65.1891
YHR062C	7	89.9	4.46999	0	8	67.1319
YKL024C	7	89.9	4.87636	0	11	149.276
YGL161C	7	91.9	4.95326	1	7	74.0587
YBR200W	7	93.9	4.08882	0	2	186.253
YNR041C	7	95.9	4.72738	0	14	259.621
YFL067W	7	97.9	4.07891	0	6	0.36278
YJR070C	7	97.9	3.99553	0	10	171.146
YIL173W	7	100	4.36159	0	9	5.15574
YJL222W	7	100	4.09115	0	10	3.47369
YLR107W	7	100	4.45617	0	12	131.097
YHR050W	7	100.9	4.43914	0	8	62.2969
YGL186C	7	102.9	5.39298	0	7	56.5593
YDL054C	7	104.9	4.10708	0	4	111.998
YDR456W	7	105.9	5.43079	0	4	423.929
YDR240C	7	106.9	4.38035	0	4	292.959
YGL124C	7	106.9	4.52854	1	7	102.401
YNL186W	7	106.9	4.37774	0	14	107.104
YJR001W	7	107.9	4.30568	0	10	131.053
YML005W	7	107.9	7.03689	0	13	88.4376
YGL119W	7	108.9	5.52871	1	7	105.262
YGL198W	7	108.9	4.37155	0	7	45.7653
YHR175W	7	108.9	5.56178	0	8	135.868
YAL053W	7	109.9	4.23016	0	1	20.6469
YDR059C	7	109.9	5.2869	0	4	176.582
YMR155W	7	109.9	5.15042	0	13	193.308
YNL322C	7	109.9	4.61084	0	14	12.6646
YCR010C	7	110.9	4.59825	0	3	63.9032
YGL127C	7	110.9	4.75387	1	7	100.202
YLR356W	7	110.9	4.17593	0	12	302.532
YOR142W	7	110.9	4.18104	0	15	195.68
YBR119W	7	111.9	3.96795	0	2	143.815
YDL212W	7	111.9	4.19256	0	4	24.2895
YDR100W	7	111.9	5.04977	0	4	203.076
YAL017W	7	112.9	4.86675	0	1	54.1017
YKR026C	7	112.9	4.37179	0	11	185.898
YBL047C	7	113.9	4.22597	0	2	39.6367
YPR098C	7	113.9	4.07863	0	16	211.552
YBR139W	7	114.9	4.70026	0	2	154.732
YDL072C	7	115.9	4.04815	0	4	102.422
YGL108C	7	115.9	6.37503	1	7	112.529
YBR269C	7	116.9	4.34728	0	2	222.791
YPL154C	7	116.9	4.11772	0	16	75.6694
YGL096W	7	117.9	18.0738	1	7	120.4
YHR118C	7	117.9	4.21959	0	8	103.696
YGL097W	7	118.9	4.26241	1	7	119.086
YGL115W	7	118.9	4.80898	1	7	108.072
YBR030W	7	119.9	5.55999	0	2	89.501
YGL090W	7	119.9	5.2879	1	7	127.056
YJR044C	7	120.9	4.212	0	10	155.758
YPR004C	7	120.9	4.17893	0	16	163.847
YHR173C	7	121.7	4.21183	0	8	135.354
YPR091C	7	122.9	4.78526	0	16	208.38
YGL104C	7	124.9	5.33139	1	7	114.788
YGL094C	7	126.9	6.15696	1	7	123.78
YOL094C	7	129.9	5.52136	0	15	47.0514
YLR300W	7	131.9	4.92103	0	12	262.428
YGL067W	7	132.9	18.5948	1	7	139.183
YPL240C	7	132.9	4.97304	0	16	28.5596
YGL069C	7	133.9	5.48365	1	7	138.965
YNL007C	7	135.9	5.70263	0	14	229.252
YGL041C	7	137.9	4.12342	1	7	155.136
YGL050W	7	137.9	5.67621	1	7	150.16
YDL020C	7	138.9	3.98313	0	4	129.206
YGL066W	7	138.9	8.07132	1	7	139.74
YGL056C	7	139.9	5.56154	1	7	147.143
YGL060W	7	139.9	20.4871	1	7	144.349
YOR027W	7	140.9	4.78239	0	15	125.731
YBR062C	7	148.9	4.84496	0	2	109.965
YKL182W	7	148.9	5.38141	0	11	38.2388
YPL231W	7	148.9	5.82887	0	16	31.4739
YGL095C	7	149.9	5.13623	0	7	122.353
YGL053W	7	151.9	21.2692	1	7	148.981
YDR265W	7	153.9	4.21227	0	4	309.629
YGL052W	7	153.9	12.2735	1	7	149.295
YGL041W-A	7	154.9	4.62445	1	7	155.068
YDR085C	7	155.9	4.54479	0	4	191.008
YGL035C	7	156.9	10.2221	1	7	160.255
YGL001C	7	157.9	4.2706	0	7	183.742
YNL106C	7	157.9	4.05751	0	14	157.062
YDR492W	7	158.9	5.06231	0	4	444.787
YGL014W	7	162.9	5.07495	1	7	172.495
YHR035W	7	166.9	7.94559	0	8	53.4394
YGR012W	7	182.9	10.0225	1	7	189.913
YGR010W	7	186.9	4.2181	1	7	189.315
YGL006W	7	190.1	10.9967	1	7	179.823
YGR015C	7	190.1	5.31783	1	7	193.209
YGR029W	7	202.9	14.9968	1	7	201.147
YGR013W	7	204.9	6.55741	1	7	190.429
YGR028W	7	204.9	5.76702	1	7	200.648
YGR039W	7	206.9	9.84283	1	7	212.727
YGR018C	7	209.9	4.05071	1	7	194.177
YBR089W	7	212.5	3.9703	0	2	127.538
YGR038W	7	212.5	8.20497	1	7	207.477
YGR057C	7	212.5	5.82475	1	7	224.026
YDR250C	7	220.9	4.45678	0	4	297.677
YGR078C	7	234.5	4.68379	1	7	236.904
YGR065C	7	236.9	12.9404	1	7	229.325
YGR091W	7	237.9	9.1192	1	7	246.521
YGR077C	7	242.9	11.9548	1	7	236.586
YGR080W	7	243.9	9.68176	1	7	237.511
YGR104C	7	250.9	8.39452	1	7	258.395
YGR099W	7	251.9	9.12434	1	7	254.509
YGR110W	7	253.9	10.5123	1	7	264.09
YGR122W	7	266.9	8.15382	1	7	271.598
YAR028W	7	269.9	4.23465	0	1	83.179
YGR117C	7	269.9	11.808	1	7	268.83
YAR030C	7	274.9	4.26064	0	1	84.0615
YGR131W	7	274.9	15.8221	1	7	279.277
YGR125W	7	275.9	8.88345	1	7	274.7
YGR127W	7	277.9	6.28164	1	7	276.351
YAR035W	7	278.9	4.18813	0	1	85.5646
YAR033W	7	279.9	4.37268	0	1	84.6258
YKR069W	7	281.9	6.15389	0	11	217.031
YBR294W	7	282.9	5.93131	0	2	236.749
YGL051W	7	282.9	4.13804	0	7	149.387
YLR303W	7	282.9	6.17225	0	12	263.722
YDR253C	7	283.9	7.53863	0	4	298.982
YER091C	7	283.9	6.63723	0	5	119.766
YPR167C	7	283.9	8.2764	0	16	254.507
YDL059C	7	284.9	5.97658	0	4	106.922
YJR010W	7	284.9	7.92282	0	10	136.902
YKL001C	7	284.9	7.41942	0	11	166.816
YNL276C	7	284.9	8.09245	0	14	43.9947
YFR030W	7	285.9	6.88033	0	6	102.385
YIL074C	7	285.9	4.55289	0	9	100.072
YLL065W	7	285.9	4.39831	0	12	4.17877
YLR364W	7	285.9	4.67415	0	12	307.487
YOL091W	7	285.9	5.11118	0	15	47.9686
YDR544C	7	286.9	4.64564	0	4	472.892
YER043C	7	286.9	6.69947	0	5	83.0074
YGL125W	7	286.9	9.677	0	7	100.848
YJR137C	7	286.9	7.50487	0	10	204.977
YLR092W	7	286.9	10.7695	0	12	116.517
YLR180W	7	286.9	9.27918	0	12	185.512
YNL277W	7	287.9	6.43482	0	14	43.4488
YGR154C	7	288.9	5.98726	1	7	295.201
YGR156W	7	289.9	7.32228	1	7	296.189
YJL101C	7	289.9	7.76333	0	10	70.8971
YJL060W	7	291.9	8.46565	0	10	97.0181
YLR094C	7	292.9	4.64425	0	12	118.567
YJL212C	7	293.9	13.3879	0	10	10.9028
YIL046W-A	7	294.9	4.87667	0	9	120.708
YKR027W	7	296.9	3.99981	0	11	186.547
YGL196W	7	298.9	4.4698	0	7	48.0928
YDR391C	7	299.2	5.95674	0	4	390.001
YGR158C	7	299.2	5.16997	1	7	298.21
YGR161W-C	7	299.2	6.84939	1	7	299.764
YGR170W	7	299.2	4.36501	1	7	309.729
YJL116C	7	299.2	4.37019	0	10	58.48
YPL207W	7	299.2	4.21894	0	16	46.37
YPL254W	7	299.2	4.2903	0	16	20.1113
YLR257W	7	300.9	5.13985	0	12	237.151
YMR071C	7	305.9	4.18153	0	13	139.807
YDR069C	7	310.9	4.42754	0	4	182.173
YMR083W	7	310.9	6.52671	0	13	147.815
YOL166W-A	7	310.9	4.52441	0	15	0.1434
YGR184C	7	321.9	6.20299	1	7	320.321
YDL035C	7	325.9	3.96713	0	4	121.562
YGR200C	7	327.9	5.65759	1	7	333.854
YGR143W	7	329.9	3.99209	0	7	286.831
YGR201C	7	329.9	8.2654	1	7	334.197
YBR066C	7	333.9	4.25917	0	2	111.219
YGL191W	7	333.9	3.97665	0	7	53.6141
YMR286W	7	333.9	4.81837	0	13	286.247
YPR196W	7	333.9	4.40614	0	16	270.146
YFL036W	7	335.9	3.98166	0	6	28.1871
YGR165W	7	335.9	4.11663	0	7	306.757
YMR287C	7	335.9	4.22372	0	13	287.406
YPR047W	7	335.9	4.17191	0	16	190.68
YER050C	7	336.9	4.03187	0	5	89.0542
YGR174C	7	336.9	5.59665	0	7	313.158
YHR038W	7	336.9	4.83303	0	8	55.1988
YLR439W	7	336.9	4.55504	0	12	365.209
YNL284C	7	336.9	5.47085	0	14	38.5524
YOR354C	7	336.9	4.30006	0	15	331.077
YDR175C	7	337.9	4.77151	0	4	252.421
YHL004W	7	337.9	4.23137	0	8	29.7774
YKR016W	7	337.9	4.45909	0	11	178.329
YLR228C	7	337.9	4.40175	0	12	216.898
YML120C	7	337.9	4.03549	0	13	10.1087
YBR085W	7	338.9	4.466	0	2	124.773
YDR237W	7	338.9	4.01799	0	4	290.312
YDR322W	7	338.9	4.21468	0	4	344.289
YDR493W	7	338.9	5.27796	0	4	445.187
YEL069C	7	338.9	4.29155	0	5	8.11095
YER182W	7	338.9	4.00631	0	5	193.351
YGR112W	7	338.9	4.18304	0	7	265.444
YGR208W	7	338.9	8.57327	1	7	337.418
YIL093C	7	338.9	4.62511	0	9	84.9165
YLR069C	7	338.9	4.66288	0	12	98.6358
YMR145C	7	338.9	4.73545	0	13	189.209
YNL315C	7	338.9	4.07076	0	14	16.3892
YOR150W	7	338.9	4.01029	0	15	201.929
YDR375C	7	339.9	4.29404	0	4	380.223
YGR084C	7	339.9	4.92485	0	7	239.781
YHR011W	7	339.9	4.25765	0	8	38.3243
YHR116W	7	339.9	5.12164	0	8	102.504
YLR163C	7	339.9	3.99877	0	12	177.573
YLR382C	7	339.9	6.03382	0	12	318.523
YCR003W	7	340.9	4.83824	0	3	56.9355
YDR494W	7	340.9	4.6908	0	4	445.408
YHR005C-A	7	340.9	4.55068	0	8	34.7696
YMR188C	7	340.9	4.37581	0	13	216.613
YPR151C	7	340.9	4.24865	0	16	241.18
YGR076C	7	341.9	4.07938	0	7	235.869
YGR215W	7	341.9	4.21272	1	7	341.234
YKL150W	7	341.9	5.7866	0	11	63.29
YML050W	7	341.9	4.2863	0	13	58.8686
YBR179C	7	342.9	4.02934	0	2	176.712
YML054C	7	342.9	4.09037	0	13	56.8901
YOL071W	7	342.9	4.02672	0	15	64.8076
YOR215C	7	342.9	4.8711	0	15	246.616
YPR100W	7	342.9	4.04061	0	16	211.67
YBR183W	7	343.9	4.28774	0	2	178.812
YBR282W	7	343.9	4.2911	0	2	230.463
YGR207C	7	344.9	4.63117	1	7	337.323
YBR238C	7	346.7	4.06993	0	2	209.224
YKL018C-A	7	346.7	4.8544	0	11	153.349
YGR221C	7	348.9	5.95677	1	7	347.464
YGR229C	7	349.9	5.82459	1	7	351.859
YLR073C	7	350.9	5.02779	0	12	101.412
YGL011C	7	351.9	4.19312	0	7	175.869
YGR247W	7	357.9	5.79027	1	7	364.433
YGR275W	7	357.9	4.14342	0	7	386.002
YKL187C	7	358.9	5.36589	0	11	34.7617
YJL056C	7	360.9	4.63529	0	10	99.9326
YCR108C	7	377.9	4.03906	0	3	151.753
YGR262C	7	381.9	4.71215	1	7	376.558
YGR279C	7	382.9	4.52905	1	7	388.475
YHL048W	7	386.9	4.29733	0	8	1.89002
YGR286C	7	387.9	4.74358	1	7	394.019
YBR298C	7	391.5	4.17538	0	2	241.321
YFL062W	7	391.5	4.18716	0	6	3.04738
YGR281W	7	391.5	4.15902	1	7	389.535
YGR289C	7	391.5	25.7785	1	7	398.042
YGR290W	7	391.5	30.4207	1	7	397.919
YGR295C	7	391.5	20.9476	1	7	400.601
YMR007W	7	391.5	4.02442	0	13	95.1461
YNL336W	7	391.5	5.66041	0	14	3.07608
YAL014C	8	8.3	4.67007	0	1	58.0522
YEL018W	8	8.3	4.03527	0	5	42.5443
YHL042W	8	8.3	9.96703	1	8	4.67077
YHL043W	8	8.3	12.1559	1	8	4.44087
YHL048W	8	8.3	9.24464	1	8	1.89002
YHR090C	8	8.3	5.25686	0	8	85.3479
YIR043C	8	8.3	4.24822	0	9	197
YIR044C	8	8.3	10.5677	0	9	197.2
YJL125C	8	8.3	4.1144	0	10	56.0266
YKL111C	8	8.3	4.69444	0	11	86.7846
YOL003C	8	8.3	4.3512	0	15	106.578
YNL151C	8	9.3	4.38368	0	14	128.976
YDR043C	8	10.3	7.48953	0	4	168.476
YOR380W	8	10.3	4.06615	0	15	346.915
YLL053C	8	11.3	5.3629	0	12	12.9038
YDR311W	8	12.3	4.41582	0	4	336.343
YHL026C	8	12.3	17.9919	1	8	16.2411
YHL035C	8	12.3	4.21646	1	8	9.8027
YLL052C	8	12.3	5.54842	0	12	13.0478
YDR359C	8	13.3	4.94072	0	4	370.405
YDR017C	8	14.3	4.10396	0	4	149.522
YHL023C	8	14.3	15.434	1	8	18.7663
YPL147W	8	14.3	6.73309	0	16	79.2517
YHL044W	8	15.3	4.6823	1	8	4.03988
YHL047C	8	15.3	6.10769	1	8	3.03383
YPL210C	8	15.3	5.03089	0	16	45.2969
YPL226W	8	15.3	4.42925	0	16	35.2858
YBR182C	8	16.3	5.48743	0	2	178.436
YPL150W	8	16.3	4.31645	0	16	77.7784
YPL152W	8	16.3	5.11557	0	16	76.8596
YPL216W	8	16.3	4.91906	0	16	41.6955
YPL219W	8	16.3	4.10134	0	16	39.6403
YDR040C	8	17.3	4.06544	0	4	166.963
YML111W	8	17.3	3.98174	0	13	15.9476
YPL123C	8	17.3	7.16498	0	16	92.5362
YPL167C	8	17.3	6.61904	0	16	68.7498
YPL194W	8	17.3	4.67674	0	16	51.9768
YPL204W	8	17.3	5.34695	0	16	47.6342
YPL253C	8	17.3	4.98886	0	16	21.1303
YPL266W	8	17.3	4.65879	0	16	11.3243
YPL277C	8	17.3	4.36301	0	16	4.87409
YHL022C	8	18.3	5.13519	1	8	19.2456
YOR389W	8	18.3	4.30823	0	15	354.48
YPL126W	8	18.3	4.77066	0	16	89.9965
YPL166W	8	18.3	5.44801	0	16	68.8169
YPL174C	8	18.3	5.25889	0	16	64.5865
YPL180W	8	18.3	4.25559	0	16	59.4965
YPL195W	8	18.3	6.22804	0	16	51.0927
YPL203W	8	18.3	4.80211	0	16	48.2074
YPL207W	8	18.3	4.50296	0	16	46.37
YPL209C	8	18.3	4.60902	0	16	45.6983
YPL212C	8	18.3	4.86838	0	16	44.4067
YPL227C	8	18.3	4.60576	0	16	35.1114
YPL235W	8	18.3	5.19187	0	16	29.8986
YPL259C	8	18.3	4.83565	0	16	15.2455
YHL031C	8	19.3	5.39568	1	8	11.8266
YPL112C	8	19.3	3.96828	0	16	98.2447
YPL115C	8	19.3	5.37606	0	16	97.3366
YPL120W	8	19.3	4.30501	0	16	93.4451
YPL125W	8	19.3	4.8861	0	16	90.9205
YPL138C	8	19.3	4.78404	0	16	84.826
YPL159C	8	19.3	4.96688	0	16	72.979
YPL161C	8	19.3	3.99377	0	16	71.3966
YPL169C	8	19.3	4.47294	0	16	66.929
YPL179W	8	19.3	4.70943	0	16	60.3414
YPL188W	8	19.3	6.25533	0	16	55.488
YPL191C	8	19.3	4.25202	0	16	53.5406
YPL193W	8	19.3	4.19003	0	16	52.5923
YPL213W	8	19.3	5.9358	0	16	43.6699
YPL225W	8	19.3	4.86492	0	16	36.5179
YPL241C	8	19.3	4.52141	0	16	27.8411
YPL242C	8	19.3	5.58573	0	16	27.5377
YPL243W	8	19.3	4.58418	0	16	25.6217
YPL262W	8	19.3	4.71236	0	16	13.7016
YPL263C	8	19.3	5.0089	0	16	13.4614
YPL100W	8	20.3	4.62447	0	16	104.982
YPL106C	8	20.3	5.29903	0	16	102.201
YPL116W	8	20.3	5.78159	0	16	95.6328
YPL117C	8	20.3	4.83451	0	16	95.3789
YPL145C	8	20.3	4.4762	0	16	81.1253
YPL158C	8	20.3	4.37751	0	16	73.7464
YPL160W	8	20.3	4.23665	0	16	71.6203
YPL164C	8	20.3	5.46809	0	16	70.0249
YPL176C	8	20.3	4.08725	0	16	63.3057
YPL208W	8	20.3	5.12766	0	16	45.7707
YPL234C	8	20.3	4.07554	0	16	30.5404
YPL260W	8	20.3	5.24186	0	16	14.2709
YJL128C	8	21.3	4.02385	0	10	54.0575
YPL127C	8	21.3	6.11301	0	16	89.8203
YPL196W	8	21.3	5.46181	0	16	50.7511
YPL228W	8	21.3	4.49391	0	16	34.3019
YGR262C	8	22.3	4.11863	0	7	376.558
YHL006W-A	8	22.3	4.09608	1	8	29.3324
YPL168W	8	22.3	4.22066	0	16	67.0391
YHL010C	8	23.3	4.631	1	8	25.1284
YHL014C	8	23.3	16.5382	1	8	23.2019
YPL149W	8	23.3	4.21314	0	16	78.6862
YPL218W	8	23.3	5.28106	0	16	40.2065
YPL118W	8	24.3	4.26705	0	16	94.7698
YGR060W	8	25.3	4.14219	0	7	225.895
YHL009C	8	25.3	25.6164	1	8	25.531
YHL007C	8	27.3	5.41224	1	8	29.3938
YHL008C	8	27.3	45.2025	1	8	28.3681
YBR040W	8	27.4	4.11728	0	2	95.1142
YIL037C	8	27.4	4.40536	0	9	128.229
YML066C	8	27.4	4.33226	0	13	48.1447
YHR003C	8	30.3	4.07329	1	8	33.3977
YPL098C	8	30.3	5.43122	0	16	105.809
YOR343C	8	32.3	4.20611	0	15	319.598
YDR497C	8	33.3	4.41109	0	4	448.054
YNR044W	8	33.3	5.8151	0	14	260.374
YNL042W-B	8	34.3	4.27968	0	14	202.679
YCL055W	8	36.3	4.46042	0	3	13.3886
YDR085C	8	36.3	4.89508	0	4	191.008
YHR002W	8	36.3	6.66865	1	8	32.648
YHR007C-A	8	36.3	4.83845	1	8	36.8238
YPL271W	8	37.3	5.9411	0	16	8.70622
YCR005C	8	39.3	5.40957	0	3	58.7168
YOR375C	8	40.3	4.38251	0	15	344.198
YBL061C	8	41.3	4.32273	0	2	32.2331
YHR009C	8	41.3	4.26083	1	8	37.6962
YHR008C	8	42.3	4.0393	1	8	37.0707
YHR032W	8	43.3	14.8371	1	8	51.9724
YPR149W	8	45.3	4.17755	0	16	240.672
YCR020C	8	46.3	4.87836	0	3	74.2485
YHR032W-A	8	48.3	6.95338	1	8	52.5294
YHR021W-A	8	49.3	16.4454	1	8	44.742
YHR028C	8	49.7	24.2231	1	8	50.1941
YHR033W	8	49.7	23.8585	1	8	52.6356
YHR034C	8	49.7	8.69506	1	8	53.3732
YCL025C	8	51.3	5.2412	0	3	37.388
YLR237W	8	51.3	8.22261	0	12	220.453
YGL204C	8	52.3	4.48975	0	7	41.4792
YBR240C	8	53.3	5.37369	0	2	210.588
YDR289C	8	55.3	3.98472	0	4	322.219
YHR035W	8	55.3	20.4675	1	8	53.4394
YHR043C	8	60.3	15.9884	1	8	58.0511
YHR044C	8	62.3	14.9077	1	8	58.4311
YHR058C	8	63.3	12.1213	1	8	65.973
YHR052W-A	8	64.9	16.5452	1	8	63.7605
YHR053C	8	64.9	17.8312	1	8	63.8237
YHR054W-A	8	64.9	14.12	1	8	64.3617
YHR055C	8	64.9	17.0038	1	8	64.4249
YHR065C	8	64.9	7.44892	1	8	68.7111
YHR067W	8	64.9	5.26285	1	8	69.2894
YHR062C	8	65.3	4.4565	1	8	67.1319
YML015C	8	66.3	4.08235	0	13	82.5961
YOL028C	8	73.3	4.44498	0	15	89.5477
YGR234W	8	74.3	6.14227	0	7	355.183
YOL013C	8	74.3	4.88187	0	15	99.9937
YPR085C	8	74.3	4.02147	0	16	205.869
YHR061C	8	78.3	4.73024	1	8	66.749
YBL034C	8	83.9	4.44817	0	2	47.5499
YGR014W	8	83.9	4.08781	0	7	191.312
YKR017C	8	83.9	4.38901	0	11	179.708
YGR217W	8	84.3	4.17373	0	7	342.168
YKL135C	8	84.3	4.40651	0	11	71.6707
YDL230W	8	87.3	4.68373	0	4	13.1997
YHR106W	8	90.3	5.76447	1	8	97.6716
YDR404C	8	93.3	4.10247	0	4	395.912
YGL177W	8	94.3	3.97305	0	7	62.0209
YDR181C	8	95.3	4.04916	0	4	256.511
YHR119W	8	95.3	6.01086	1	8	103.82
YHR124W	8	97.3	6.97879	1	8	106.983
YOL020W	8	97.3	4.74547	0	15	94.4308
YHR101C	8	99.3	4.58279	1	8	94.716
YHR115C	8	99.3	5.87298	1	8	102.412
YHR103W	8	100.3	7.8459	1	8	96.1124
YHR112C	8	107.3	9.35478	1	8	100.699
YHR144C	8	121.2	4.14147	1	8	116.656
YHR154W	8	121.3	5.73801	1	8	120.938
YHR166C	8	138.3	4.06262	1	8	131.734
YHR187W	8	145.3	4.98234	1	8	144.302
YAR073W	8	150.3	5.45896	0	1	102.461
YHR216W	8	150.3	4.83857	1	8	166.363
YHR171W	8	152.3	6.31628	1	8	133.726
YHR180W	8	153.3	4.77143	1	8	139.55
YAR060C	8	154.3	6.30326	0	1	97.8486
YEL063C	8	156	4.15537	0	5	11.6936
YHR202W	8	156	6.46059	1	8	150.74
YHR209W	8	156	4.7552	1	8	155.87
YHR211W	8	156	19.9334	1	8	157.658
YOR108W	8	156	4.13005	0	15	172.618
YAR068W	9	13.9	11.4431	0	1	100.06
YDR368W	9	13.9	4.40029	0	4	376.305
YIL158W	9	13.9	11.0122	1	9	20.7693
YIL166C	9	13.9	15.1746	1	9	14.6399
YIL168W	9	13.9	16.8996	1	9	13.0502
YIL169C	9	13.9	11.2803	1	9	11.7333
YIL173W	9	13.9	6.26779	1	9	5.15574
YJL222W	9	13.9	6.40282	0	10	3.47369
YKL047W	9	13.9	4.86359	0	11	132.674
YHR214W-A	9	14.9	11.2088	0	8	162.945
YIL165C	9	14.9	4.25169	1	9	15.3192
YIL167W	9	14.9	19.9463	1	9	13.2231
YML132W	9	16.9	4.52425	0	13	2.43496
YFR007W	9	17.9	5.34922	0	6	76.4192
YPL013C	9	18.9	4.08374	0	16	153.488
YBR302C	9	21.9	7.23084	0	2	243.422
YIL163C	9	23.9	4.61311	1	9	16.7464
YDR296W	9	24.9	4.05804	0	4	327.077
YOR020C	9	24.9	4.89606	0	15	122.363
YDR316W	9	25.9	4.04649	0	4	339.051
YLR315W	9	30.9	3.98664	0	12	275.342
YIL146C	9	35.9	9.90538	1	9	34.0629
YIL151C	9	37.9	16.7629	1	9	27.2844
YLR099W-A	9	40.8	4.04416	0	12	122.909
YIL134C-A	9	43.9	5.34401	1	9	43.4863
YLR317W	9	43.9	3.99052	0	12	275.647
YGR056W	9	46.9	4.63762	0	7	222.609
YKL019W	9	49.9	4.85038	0	11	152.852
YDR067C	9	51.9	4.19019	0	4	180.851
YIL128W	9	52.9	6.39345	1	9	51.1788
YIL131C	9	53.9	4.472	1	9	45.9678
YIL130W	9	54.9	13.6964	1	9	46.2141
YIL118W	9	55.9	5.0941	1	9	62.8622
YIL119C	9	59.9	6.99569	1	9	62.0178
YER130C	9	61.9	4.89289	0	5	147.902
YIL120W	9	63.9	9.28388	1	9	60.4596
YOR263C	9	69.1	3.98434	0	15	270.349
YIL116W	9	71.9	11.556	1	9	64.2925
YIL111W	9	72.9	6.33371	1	9	69.8279
YIL109C	9	75.9	6.27587	1	9	72.0501
YIL076W	9	87.9	4.6993	1	9	97.4479
YIL100W	9	89.9	4.66403	1	9	79.7864
YIL071W-A	9	90.9	7.493	1	9	102.801
YIL062C	9	91.9	4.11721	1	9	109.968
YIL084C	9	95.9	11.0201	1	9	91.4241
YIL087C	9	95.9	16.6779	1	9	90.0124
YIL089W	9	96.9	10.1978	1	9	87.9803
YMR264W	9	96.9	5.07617	0	13	270.537
YIL072W	9	99.9	12.0226	1	9	101.924
YIL082W-A	9	100.9	4.01354	1	9	92.4923
YPL125W	9	100.9	4.34384	0	16	90.9205
YIL073C	9	101.9	5.74581	1	9	101.567
YIL046W-A	9	113.9	7.23046	1	9	120.708
YIL059C	9	113.9	13.2117	1	9	111.072
YIL046W	9	115.9	7.57526	1	9	120.862
YIL028W	9	120.9	13.1112	1	9	135.945
YIL033C	9	124.9	4.68906	1	9	131.239
YHR213W-A	9	126.1	5.1819	0	8	162.207
YIL029C	9	128.9	32.4154	1	9	135.565
YIL036W	9	132.9	4.50731	1	9	128.53
YIL014W	9	136.9	12.1315	1	9	146.776
YIL014C-A	9	140.9	13.5962	1	9	146.516
YIL012W	9	141.9	9.91887	1	9	149.894
YIL010W	9	148.9	5.64491	1	9	150.738
YJL221C	9	148.9	4.05743	0	10	5.59141
YIL003W	9	149.9	5.13327	1	9	157.145
YMR156C	9	149.9	4.13585	0	13	194.144
YJR112W-A	9	158.9	4.37713	0	10	191.336
YLR265C	9	162.9	4.01821	0	12	243.131
YIR016W	9	166.9	5.3351	1	9	172.209
YIR032C	9	170.9	4.29634	1	9	187.045
YIR024C	9	172.9	5.48467	1	9	181.589
YGL259W	9	176.9	8.74411	0	7	3.11632
YIR026C	9	176.9	5.88858	1	9	182.702
YIR039C	9	180.9	19.9907	1	9	194.468
YIR042C	9	181.9	28.7037	1	9	196.212
YIR027C	9	182.7	4.74711	1	9	183.456
YIR031C	9	182.7	20.6145	1	9	186.623
YFL055W	10	10.4	4.80955	0	6	8.12746
YIL173W	10	10.4	6.95236	0	9	5.15574
YJL213W	10	10.4	14.006	1	10	9.6784
YJL215C	10	10.4	14.362	1	10	8.06124
YJL216C	10	10.4	17.487	1	10	7.85579
YJL217W	10	10.4	12.4198	1	10	6.97014
YJL218W	10	10.4	10.8667	1	10	6.62223
YJL222W	10	10.4	7.01144	1	10	3.47369
YHL042W	10	15.4	4.10088	0	8	4.67077
YHL043W	10	16.4	4.67533	0	8	4.44087
YJL187C	10	17.4	4.80637	1	10	23.7746
YJL185C	10	20.4	4.25609	1	10	24.8858
YJL195C	10	21.4	5.35104	1	10	20.9855
YJL181W	10	22.4	13.4968	1	10	25.689
YJL183W	10	22.4	5.79387	1	10	25.2126
YJL178C	10	23.4	5.18032	1	10	27.0169
YJL179W	10	24.4	6.08116	1	10	26.6248
YJL186W	10	25.4	4.38942	1	10	24.0416
YGL154C	10	26.4	3.99604	0	7	79.9562
YJL171C	10	26.4	5.84416	1	10	30.2644
YPL226W	10	29.4	4.21689	0	16	35.2858
YMR278W	10	31.4	4.03531	0	13	279.714
YLR281C	10	32.4	4.13754	0	12	253.766
YPL125W	10	32.4	4.08985	0	16	90.9205
YLR223C	10	39.4	4.92428	0	12	210.806
YPL174C	10	39.4	4.01132	0	16	64.5865
YNL206C	10	45	4.1427	0	14	95.4871
YJL121C	10	50.4	10.2171	1	10	57.3475
YJL132W	10	50.4	7.79603	1	10	48.6121
YJL153C	10	50.4	6.78828	1	10	40.8114
YML088W	10	52.4	4.37404	0	13	31.3799
YOR283W	10	52.4	5.29858	0	15	279.673
YHR028W-A	10	55.4	4.46305	0	8	50.1694
YGL255W	10	56.4	5.18469	0	7	7.74435
YJL144W	10	56.4	4.48804	1	10	43.9495
YJL112W	10	65.1	4.39124	1	10	61.6023
YJL127C	10	72.4	6.78707	1	10	55.2904
YJL062W-A	10	73.4	4.426	0	10	95.0134
YDR534C	10	83.1	4.24336	0	4	466.5
YMR251W	10	83.1	4.13397	0	13	262.745
YOR384W	10	83.1	4.04305	0	15	350.306
YJL077W-B	10	83.4	14.7602	1	10	88.1908
YOR383C	10	84.4	4.37538	0	15	350.138
YJL077C	10	89.4	5.93932	1	10	88.4959
YBR224W	10	93.4	5.24091	0	2	201.056
YJL056C	10	106.4	7.09273	1	10	99.9326
YNL086W	10	107.4	4.3992	0	14	172.726
YJL035C	10	110.4	7.13011	1	10	114.294
YJL043W	10	110.4	8.07912	1	10	108.048
YKL098W	10	113.4	4.06458	0	11	97.422
YAR014C	10	134.4	4.20271	0	1	75.9694
YJR010C-A	10	134.4	4.22166	1	10	137.541
YJR015W	10	137.4	16.9831	1	10	138.853
YOL048C	10	137.4	4.07091	0	15	79.4881
YOR073W-A	10	143.4	4.41071	0	15	154.229
YJR024C	10	145.4	4.39375	1	10	141.322
YJR022W	10	146.4	6.37299	1	10	140.968
YJR030C	10	150.4	6.98426	1	10	145.882
YJR056C	10	151.4	5.84265	1	10	162.738
YOR006C	10	153.4	5.38319	0	15	111.733
YJR050W	10	155.4	4.54196	1	10	158.606
YJR025C	10	156.4	10.8416	1	10	141.533
YJR060W	10	159.2	19.9092	1	10	164.61
YJR061W	10	159.2	15.0613	1	10	165.135
YGR260W	10	163.4	4.10681	0	7	374.606
YJR032W	10	163.4	5.148	1	10	147.344
YJR055W	10	164.4	7.60425	1	10	161.621
YPL246C	10	167.4	4.01773	0	16	24.6872
YPL162C	10	168.4	3.99275	0	16	70.7597
YPL270W	10	168.4	4.39116	0	16	8.82312
YPL188W	10	169.4	3.98958	0	16	55.488
YPL148C	10	170.4	3.97488	0	16	79.1237
YPL281C	10	170.4	4.19375	0	16	3.13424
YIL094C	10	171.4	5.11806	0	9	84.3986
YPL116W	10	171.4	4.04586	0	16	95.6328
YDL182W	10	173.4	4.01098	0	4	41.3506
YJR084W	10	173.4	4.16656	1	10	175.077
YCR037C	10	176.3	4.37056	0	3	94.664
YJR088C	10	176.3	7.00324	1	10	176.167
YJR093C	10	176.3	5.63956	1	10	181.23
YJR094C	10	176.3	16.5377	1	10	181.666
YJR099W	10	176.3	7.92481	1	10	184.651
YJR108W	10	176.3	14.2758	1	10	188.604
YJR112W-A	10	176.3	7.23853	1	10	191.336
YMR144W	10	178.4	4.34756	0	13	188.153
YCR036W	10	182.4	3.99259	0	3	92.7975
YDR242W	10	183.4	4.80309	0	4	293.473
YOR233W	10	183.4	4.21091	0	15	256.046
YJR091C	10	184.4	6.21273	1	10	179.465
YJR115W	10	187.4	11.343	1	10	191.983
YOL154W	10	187.4	4.12496	0	15	11.3884
YJR113C	10	188.4	7.1514	1	10	191.692
Q0110	10	191.4	6.00169	0	17	NA
Q0255	10	192.4	5.08511	0	17	NA
YJR127C	10	195.9	23.2317	1	10	198.923
YJR129C	10	195.9	9.37538	1	10	199.51
YGR270C-A	10	199.4	4.00889	0	7	380.2
YIL113W	10	199.4	4.0693	0	9	67.7291
YJR131W	10	199.4	13.4885	1	10	200.295
YGR138C	10	201.4	4.41556	0	7	283.293
YDL248W	10	202.4	6.88605	0	4	0.515328
YPR196W	10	205.4	4.23014	0	16	270.146
YJR149W	10	207.4	4.55899	1	10	212.122
YFL058W	10	208.4	5.18874	0	6	6.17044
YDL246C	10	211.4	6.4025	0	4	2.98121
YDL247W-A	10	211.4	10.0116	0	4	1.12296
YJR161C	10	211.4	8.59513	1	10	223.168
YJR159W	10	212.4	9.21246	1	10	220.782
YDL247W	10	213.4	18.3835	0	4	1.81213
YJR160C	10	213.4	19.3156	1	10	221.913
YNL335W	10	213.4	4.18857	0	14	4.23116
YFL060C	10	213.6	4.46122	0	6	5.22915
YIL122W	10	213.6	4.16951	0	9	58.7451
YJR154W	10	213.6	5.74873	1	10	217.705
YNL334C	10	213.6	4.65821	0	14	4.75801
YKL219W	11	10.6	7.81694	1	11	5.54355
YKL222C	11	10.6	6.23649	1	11	2.17562
YKL183C-A	11	26.6	5.2419	1	11	37.4531
YGR258C	11	34.7	4.31865	0	7	373.97
YKL187C	11	40.6	7.70311	1	11	34.7617
YKL162C	11	45.6	10.4138	1	11	56.5729
YKL201C	11	50.6	10.2131	0	11	25.637
YKL162C-A	11	62.6	6.70529	1	11	55.5208
YLR154W-A	11	66.6	4.156	0	12	162.845
YKL147C	11	70.6	4.0766	1	11	65.4231
YKL115C	11	79.6	6.46664	1	11	84.6877
YKL130C	11	79.6	19.7727	1	11	74.4706
YKL132C	11	79.6	11.7883	1	11	74.0298
YKL128C	11	80.6	6.78221	1	11	76.5141
YKL140W	11	82.6	6.531	1	11	68.6891
YKL138C-A	11	83.6	5.25544	1	11	70.2947
YML107C	11	88.6	4.93769	0	13	19.1258
YKL119C	11	90.6	4.10191	1	11	83.1406
YKL084W	11	97.6	5.14277	1	11	106.451
YKL090W	11	101.5	5.32029	1	11	103.168
YOL119C	11	123.6	4.22556	0	15	31.8048
YJR142W	11	125.6	4.4451	0	10	209.124
YKL047W	11	125.6	7.72764	1	11	132.674
YDL011C	11	126.6	4.29957	0	4	134.135
YKL044W	11	132.6	11.9209	1	11	135.282
YKL043W	11	134.6	11.9563	1	11	135.444
YKL042W	11	137.6	3.97891	1	11	136.101
YKL110C	11	145.6	4.13588	0	11	87.1957
YKL024C	11	147.2	7.68804	1	11	149.276
YKL027W	11	150.6	7.03427	1	11	147.16
YKL020C	11	151.6	4.4008	1	11	152.667
YKL026C	11	151.6	6.32657	1	11	148.041
YKL017C	11	156.6	10.0561	1	11	154.624
YML057W	11	156.6	6.63119	0	13	54.4716
YKL006C-A	11	162.6	9.63078	1	11	163.429
YBR107C	11	178.6	4.26044	0	2	136.359
YBR218C	11	178.6	4.68025	0	2	198.689
YMR062C	11	186.6	4.08762	0	13	134.74
YML012C-A	11	187.6	4.59699	0	13	83.5764
YBR277C	11	194.7	4.02608	0	2	228.184
YKR038C	11	196.6	5.2539	1	11	194.822
YKR031C	11	199.6	7.74716	1	11	192.254
YKR021W	11	202.6	4.96769	0	11	181.942
YKR040C	11	204.6	6.35416	1	11	196.876
YKR039W	11	207.6	4.87138	1	11	195.545
YKR062W	11	212.6	5.23566	1	11	212.492
YKR079C	11	222.6	5.88828	1	11	223.769
YKR068C	11	226.6	5.5272	1	11	216.764
YKR089C	11	229.6	4.04963	1	11	231.03
YKR087C	11	233.6	6.27115	1	11	229.455
YGL262W	12	12	9.84932	0	7	1.94784
YLL049W	12	12	5.80192	1	12	14.5973
YLL061W	12	12	8.22447	1	12	6.42184
YGL263W	12	13	4.33772	0	7	1.01469
YDL133C-A	12	16	4.10626	0	4	68.7268
YLL054C	12	16	4.83138	1	12	12.6313
YHR033W	12	17	5.07514	0	8	52.6356
YLL059C	12	25	4.40167	1	12	8.2307
YLL060C	12	25	4.78608	1	12	7.81989
YLL027W	12	31.4	4.10855	1	12	31.4198
YLL039C	12	35	4.42129	1	12	23.4306
YLL029W	12	39	4.06113	1	12	29.281
YLL016W	12	45	5.56932	1	12	40.5781
YLL006W	12	50.8	5.18477	1	12	49.1227
YLL010C	12	50.8	7.28924	1	12	46.9728
YCR034W	12	55	4.2056	0	3	91.4988
YLR006C	12	55	8.88658	1	12	58.9657
YLR011W	12	56	5.94193	1	12	60.8443
YEL056W	12	58	6.81164	0	5	16.4919
YBR067C	12	60	5.1721	0	2	111.828
YLR017W	12	60	5.01271	1	12	63.9109
YNL152W	12	60	4.75505	0	14	128.162
YBR057C	12	62	6.21076	0	2	106.017
YBR066C	12	62	5.04166	0	2	111.219
YDR468C	12	65	4.42115	0	4	433.588
YLR015W	12	67	8.6973	1	12	63.0524
YKL019W	12	68	5.6004	0	11	152.852
YDR217C	12	70	4.04493	0	4	280.038
YMR210W	12	74.2	4.73609	0	13	233.759
YLR113W	12	76	4.10627	0	12	133.793
YLR036C	12	77	17.6933	1	12	79.9654
YJL049W	12	79	4.39657	0	10	103.811
YJL162C	12	81	4.91833	0	10	34.7001
YFL022C	12	84	5.72066	0	6	45.5777
YLR035C	12	84	5.47311	1	12	77.1977
YLR074C	12	84	5.51565	1	12	101.713
YML098W	12	85	5.64122	0	13	26.2809
YGR231C	12	87	4.49195	0	7	352.812
YDL115C	12	89	4.3798	0	4	79.0491
YLR059C	12	91	9.02772	1	12	93.8166
YLR073C	12	91	4.90574	1	12	101.412
YMR141W-A	12	91	5.34786	0	13	187.321
YML081W	12	96	4.56791	0	13	35.6459
YAL001C	12	97.6	4.03844	0	1	67.9327
YKL111C	12	98	5.48137	0	11	86.7846
YFR003C	12	102	6.37344	0	6	73.4573
YML009C-A	12	104	4.42651	0	13	85.3048
YDL110C	12	105	4.27762	0	4	82.1577
YPL251W	12	105	7.61148	0	16	21.3094
YLR086W	12	107	11.6344	1	12	108.842
YLR097C	12	110	5.0982	1	12	121.451
YLR093C	12	121	11.9733	1	12	117.855
YBL023C	12	126	4.6281	0	2	53.2706
YLR091W	12	126	4.64439	1	12	116.068
YLR118C	12	132	5.95772	1	12	138.746
YLR114C	12	134	5.12657	1	12	135.811
YLR105C	12	138.9	3.99832	1	12	125.372
YBR011C	12	141	4.08806	0	2	77.3838
YBR232C	12	141	4.76614	0	2	205.145
YGR159C	12	141	3.99347	0	7	298.814
YBR106W	12	142	4.40869	0	2	135.796
YIL173W	12	144	6.45936	0	9	5.15574
YJL222W	12	144	6.43549	0	10	3.47369
YER165W	12	145	5.097	0	5	178.62
YJL215C	12	145	4.21466	0	10	8.06124
YOR224C	12	145	4.01216	0	15	251.232
YER025W	12	146	4.14739	0	5	71.8482
YJL216C	12	146	4.50404	0	10	7.85579
YJL217W	12	146	5.35443	0	10	6.97014
YJL219W	12	147	6.268	0	10	5.87963
YGL255W	12	148	7.63453	0	7	7.74435
YJR156C	12	149	4.49187	0	10	218.848
YDL243C	12	157.9	5.07009	0	4	5.71247
YFL054C	12	157.9	5.61186	0	6	10.9047
YFL055W	12	157.9	5.13382	0	6	8.12746
YLR152C	12	157.9	4.12685	1	12	160.048
YDL042C	12	163	17.4559	0	4	117.331
YLR161W	12	170	21.9729	1	12	176.037
YLR157W-D	12	171	22.467	1	12	171.262
YLR157W-E	12	171	22.0702	1	12	173.466
YLR159W	12	171	22.2593	1	12	174.719
YLR155C	12	172	22.8799	1	12	169.328
YLR156W	12	172	22.4115	1	12	169.944
YLR157C	12	172	23.6544	1	12	170.646
YLR158C	12	172	22.7287	1	12	174.103
YLR160C	12	172	22.7202	1	12	175.42
YLR177W	12	177	8.61938	1	12	183.995
YLR179C	12	182.4	10.0299	1	12	185.314
YNL204C	12	182.4	4.03924	0	14	95.9017
YER010C	12	186	4.49207	0	5	60.6954
YLR169W	12	188	5.55438	1	12	180.128
YKL219W	12	190	6.39605	0	11	5.54355
YLR213C	12	198	4.61206	1	12	204.5
YLR215C	12	209	4.11157	1	12	205.913
YLR008C	12	210	4.1349	0	12	59.7554
YOR356W	12	211	5.88268	0	15	332.394
YNL261W	12	213	4.05204	0	14	57.4027
YDR270W	12	215	4.73596	0	4	311.743
YOR201C	12	215	4.3344	0	15	238.175
YLR225C	12	216	5.95519	1	12	212.036
YPL231W	12	216	4.33802	0	16	31.4739
YGL194C-A	12	217	5.98257	0	7	51.8211
YLR452C	12	218	4.94322	0	12	374.893
YDL089W	12	219	5.18502	0	4	92.0209
YHR039C	12	219	8.66729	0	8	56.0242
YNL280C	12	219	4.70083	0	14	40.8843
YPL028W	12	220	4.77354	0	16	144.416
YAR073W	12	221	4.49496	0	1	102.461
YGL101W	12	221	7.24006	0	7	115.536
YBR264C	12	222	4.90552	0	2	221.533
YHR216W	12	223	4.49116	0	8	166.363
YJR042W	12	223	4.00044	0	10	154.222
YJR105W	12	223	5.95345	0	10	187.06
YKL182W	12	223	4.12985	0	11	38.2388
YOR241W	12	223	4.04165	0	15	259.728
YJR010W	12	225.5	4.32991	0	10	136.902
YJR104C	12	225.5	5.38276	0	10	186.889
YJR150C	12	225.5	7.42946	0	10	212.885
YKL020C	12	225.5	5.91107	0	11	152.667
YKR069W	12	225.5	4.3221	0	11	217.031
YLR246W	12	225.5	9.48135	1	12	225.748
YML058W-A	12	225.5	5.16456	0	13	53.9898
YMR110C	12	225.5	8.00113	0	13	167.288
YNR073C	12	225.5	4.6023	0	14	287.21
YER043C	12	226	4.1111	0	5	83.0074
YFR018C	12	226	4.22333	0	6	88.3944
YGL191W	12	226	4.99873	0	7	53.6141
YHR190W	12	226	11.2372	0	8	145.462
YOR237W	12	226	5.47134	0	15	258.076
YDR275W	12	227	7.46178	0	4	313.784
YDR502C	12	227	9.77924	0	4	450.847
YLR244C	12	227	24.6915	1	12	225.466
YLR245C	12	227	8.30888	1	12	225.681
YDL178W	12	228	4.00125	0	4	43.2374
YDR213W	12	228	7.20377	0	4	275.782
YOR010C	12	228	8.21691	0	15	114.481
YOR171C	12	228	6.46162	0	15	215.761
YCR073C	12	229	4.86486	0	3	118.363
YDL086W	12	229	15.3992	0	4	93.4416
YDR453C	12	229	4.45734	0	4	423.362
YER011W	12	229	9.24459	0	5	61.3626
YLR153C	12	229	16.5989	0	12	161.09
YLR231C	12	229	8.62814	1	12	218.57
YML126C	12	229	13.5437	0	13	6.95502
YMR038C	12	229	5.46842	0	13	118.375
YMR202W	12	229	9.49989	0	13	226.982
YNL100W	12	229	7.13253	0	14	161.927
YBR183W	12	230	5.21066	0	2	178.812
YBR242W	12	230	4.33623	0	2	211.438
YEL051W	12	230	4.95157	0	5	20.4174
YGL055W	12	230	5.73211	0	7	147.516
YGR266W	12	230	9.93499	0	7	378.37
YHR048W	12	230	10.2474	0	8	61.3797
YJL100W	12	230	9.93671	0	10	71.1685
YLR380W	12	230	5.06721	0	12	316.201
YML075C	12	230	13.6732	0	13	40.449
YML120C	12	230	5.68304	0	13	10.1087
YMR015C	12	230	18.0274	0	13	102.807
YMR177W	12	230	4.09101	0	13	209.649
YMR208W	12	230	13.0178	0	13	232.724
YMR302C	12	230	6.89156	0	13	296.702
YNR043W	12	230	12.6305	0	14	259.708
YPR191W	12	230	5.4663	0	16	266.664
YBL093C	12	231	6.38293	0	2	13.4485
YBR059C	12	231	4.72815	0	2	108.077
YBR201C-A	12	231	7.15733	0	2	187.403
YDL174C	12	231	9.46934	0	4	45.7388
YDR216W	12	231	4.85491	0	4	277.42
YEL020W-A	12	231	4.98317	0	5	41.0488
YFR022W	12	231	4.73485	0	6	94.4596
YGL039W	12	231	8.19648	0	7	156.888
YGL056C	12	231	4.60695	0	7	147.143
YGR060W	12	231	9.17728	0	7	225.895
YHR051W	12	231	5.63344	0	8	62.914
YIL031W	12	231	5.40712	0	9	131.674
YLL058W	12	231	6.27358	0	12	8.44277
YML008C	12	231	8.56774	0	13	85.9806
YMR134W	12	231	10.8612	0	13	182.884
YMR145C	12	231	11.3579	0	13	189.209
YMR220W	12	231	14.246	0	13	242.171
YNL052W	12	231	7.92605	0	14	197.173
YNR019W	12	231	19.0372	0	14	246.201
YOR065W	12	231	12.9596	0	15	147.632
YPR065W	12	231	14.8921	0	16	197.111
YBL030C	12	232	4.44069	0	2	49.2263
YBR161W	12	232	4.05387	0	2	168.497
YCR048W	12	232	4.4817	0	3	101.742
YDR044W	12	232	10.2	0	4	169.486
YDR261C	12	232	4.27954	0	4	303.528
YEL034W	12	232	10.2441	0	5	29.9782
YFL036W	12	232	5.30708	0	6	28.1871
YFR033C	12	232	8.16209	0	6	107.895
YGL187C	12	232	4.69959	0	7	55.5969
YGR182C	12	232	4.54974	0	7	317.785
YGR183C	12	232	7.05972	0	7	317.917
YGR223C	12	232	8.17943	0	7	348.654
YHR075C	12	232	4.66236	0	8	74.8747
YJL048C	12	232	16.5906	0	10	104.608
YLR038C	12	232	7.97796	0	12	81.0616
YLR050C	12	232	7.5456	0	12	88.5974
YLR100W	12	232	9.78908	0	12	123.084
YLR205C	12	232	12.314	0	12	199.365
YLR256W	12	232	26.301	1	12	232.688
YLR265C	12	232	8.22044	1	12	243.131
YNL156C	12	232	16.9157	0	14	126.56
YPR151C	12	232	13.2195	0	16	241.18
YBR085W	12	233	8.88111	0	2	124.773
YBR120C	12	233	5.25256	0	2	144.291
YDL093W	12	233	7.50762	0	4	89.8833
YDR119W-A	12	233	13.0526	0	4	214.239
YDR297W	12	233	5.76922	0	4	327.491
YDR538W	12	233	4.15291	0	4	468.361
YEL024W	12	233	13.9373	0	5	37.5554
YER044C	12	233	10.8914	0	5	83.3215
YGL001C	12	233	10.1932	0	7	183.742
YHR007C	12	233	6.20421	0	8	36.5
YHR179W	12	233	6.91868	0	8	138.749
YIL066C	12	233	6.9044	0	9	108.277
YJL167W	12	233	11.116	0	10	31.5045
YJR048W	12	233	14.5749	0	10	157.899
YJR091C	12	233	5.54408	0	10	179.465
YKL072W	12	233	3.97438	0	11	113.705
YKR046C	12	233	24.4369	0	11	199.349
YLR395C	12	233	7.17767	0	12	327.573
YML054C	12	233	11.9122	0	13	56.8901
YMR009W	12	233	16.5781	0	13	96.5545
YMR070W	12	233	8.41358	0	13	139.088
YMR214W	12	233	4.55085	0	13	236.416
YNL111C	12	233	10.2383	0	14	154.395
YOR229W	12	233	12.0848	0	15	253.59
YOR348C	12	233	5.0771	0	15	326.309
YPR010C-A	12	233	9.30963	0	16	168.929
YAL028W	12	234	12.651	0	1	41.8266
YBR146W	12	234	4.22699	0	2	160.612
YDL086C-A	12	234	4.04324	0	4	93.6507
YDR529C	12	234	5.12806	0	4	463.911
YEL047C	12	234	10.192	0	5	23.3656
YER053C-A	12	234	18.4838	0	5	91.386
YER141W	12	234	5.34262	0	5	158.738
YIR007W	12	234	4.70554	0	9	166.848
YJL180C	12	234	4.0758	0	10	26.5569
YML021C	12	234	7.19802	0	13	78.4454
YML050W	12	234	4.92068	0	13	58.8686
YMR286W	12	234	5.62025	0	13	286.247
YNL279W	12	234	4.88825	0	14	41.0714
YOL026C	12	234	5.58136	0	15	90.5318
YOR230W	12	234	8.22059	0	15	254.38
YOR377W	12	234	7.90213	0	15	345.247
YOR387C	12	234	6.5824	0	15	353.169
YBR044C	12	235	4.35809	0	2	97.8463
YDR186C	12	235	4.9776	0	4	259.023
YDR322W	12	235	4.99103	0	4	344.289
YDR518W	12	235	13.2156	0	4	458.342
YER014W	12	235	9.84161	0	5	63.9308
YER142C	12	235	4.67434	0	5	159.638
YHR005C-A	12	235	6.49268	0	8	34.7696
YHR072W	12	235	12.2112	0	8	71.7208
YKL109W	12	235	7.59565	0	11	88.0883
YKL150W	12	235	8.98602	0	11	63.29
YKL170W	12	235	5.65371	0	11	49.6438
YLR312W-A	12	235	4.27237	0	12	273.427
YLR450W	12	235	5.84735	0	12	371.744
YML047C	12	235	4.23597	0	13	61.5613
YMR024W	12	235	4.03948	0	13	109.401
YNL208W	12	235	4.25858	0	14	94.1064
YPL215W	12	235	4.27829	0	16	42.7404
YPR152C	12	235	4.42845	0	16	241.695
YBL038W	12	236	4.58242	0	2	43.8884
YDR462W	12	236	4.02764	0	4	429.684
YDR511W	12	236	5.78571	0	4	455.675
YEL038W	12	236	5.42474	0	5	28.1509
YEL039C	12	236	11.2522	0	5	27.9811
YGR049W	12	236	12.224	0	7	218.79
YGR202C	12	236	4.05287	0	7	334.772
YGR281W	12	236	4.97667	0	7	389.535
YIL070C	12	236	5.15756	0	9	103.937
YJR126C	12	236	5.99804	0	10	197.615
YKL167C	12	236	4.00443	0	11	50.976
YLR069C	12	236	4.64789	0	12	98.6358
YLR228C	12	236	5.60648	1	12	216.898
YLR425W	12	236	4.44236	0	12	353.825
YOR066W	12	236	4.97647	0	15	148.29
YBR268W	12	237	4.30332	0	2	222.409
YCL055W	12	237	4.57043	0	3	13.3886
YER096W	12	237	4.45188	0	5	123.096
YGL144C	12	237	7.50557	0	7	86.773
YGR076C	12	237	4.7535	0	7	235.869
YGR084C	12	237	4.10902	0	7	239.781
YJR101W	12	237	5.90806	0	10	185.451
YLR168C	12	237	4.81357	0	12	180.105
YLR253W	12	237	4.72441	1	12	231.326
YLR255C	12	237	7.73455	1	12	232.522
YMR188C	12	237	5.68242	0	13	216.613
YNL315C	12	237	5.19397	0	14	16.3892
YCR089W	12	238	4.32079	0	3	128.361
YDR337W	12	238	4.29392	0	4	355.384
YEL001C	12	238	4.36323	0	5	52.8847
YEL050C	12	238	4.28173	0	5	21.2834
YGL068W	12	238	4.55237	0	7	138.807
YGR097W	12	238	5.01782	0	7	251.095
YHL004W	12	238	4.07416	0	8	29.7774
YKL008C	12	238	6.1167	0	11	162.707
YML057W	12	238	5.97649	0	13	54.4716
YMR232W	12	238	4.18432	0	13	250.523
YOR037W	12	238	5.31402	0	15	132.494
YOR158W	12	238	5.01092	0	15	208.581
YBL043W	12	239	6.83091	0	2	41.0336
YDR047W	12	239	4.48678	0	4	171.097
YDR175C	12	239	4.26058	0	4	252.421
YDR323C	12	239	5.8022	0	4	345.359
YDR437W	12	239	4.35359	0	4	414.558
YLR287C	12	239	5.08825	1	12	256.328
YOR197W	12	239	4.4474	0	15	236.649
YOR321W	12	239	4.6681	0	15	302.285
YER058W	12	240	4.7758	0	5	95.1404
YGR143W	12	240	3.96509	0	7	286.831
YIL157C	12	240	4.33747	0	9	21.3721
YML125C	12	240	10.7162	0	13	7.35085
YMR193W	12	240	4.09549	0	13	221.046
YMR298W	12	240	7.37738	0	13	293.701
YIL093C	12	241	4.01198	0	9	84.9165
YIL121W	12	241	25.4311	0	9	59.481
YKL080W	12	241	4.04887	0	11	108.17
YDR493W	12	242	4.0445	0	4	445.187
YJL107C	12	242	4.29944	0	10	66.0063
YPL257W	12	244	4.1982	0	16	18.3154
YLR270W	12	247.4	8.90827	1	12	245.192
YOL059W	12	247.4	6.10837	0	15	71.6118
YLR272C	12	251	4.36559	1	12	247.356
YDL100C	12	252	5.03163	0	4	87.8006
YDR384C	12	252	5.32311	0	4	385.03
YLR275W	12	252	4.96725	1	12	249.946
YPL252C	12	254	4.4588	0	16	21.3835
YDL133W	12	256	5.02423	0	4	68.9216
YDL193W	12	257	5.27572	0	4	35.5321
YKL033W	12	262	4.18988	0	11	142.557
YLR299W	12	263	12.2768	1	12	261.386
YLR300W	12	266	10.9258	1	12	262.428
YJL095W	12	267	4.29396	0	10	74.159
YLR315W	12	269	4.52646	1	12	275.342
YMR034C	12	270	4.06344	0	13	115.811
YPL117C	12	272	4.08503	0	16	95.3789
YLR313C	12	273	6.97391	1	12	274.456
YDL085C-A	12	278	4.0333	0	4	93.8304
YIL166C	12	279	4.57988	0	9	14.6399
YBR249C	12	283	4.1817	0	2	215.442
YLR329W	12	283	9.79743	1	12	283.122
YIL011W	12	285	3.97843	0	9	150.216
YLR338W	12	288	5.0572	1	12	289.561
YLR345W	12	290.2	4.0407	1	12	295.389
YLR342W	12	293	8.62774	1	12	291.597
YLR343W	12	295	17.5483	1	12	293.796
YLL053C	12	296	4.11964	0	12	12.9038
YLR351C	12	297	10.3926	1	12	298.941
YDR271C	12	299	7.04805	0	4	312.702
YLR287C-A	12	304	4.11715	0	12	256.569
YHR214W-A	12	310	4.60755	0	8	162.945
YLR375W	12	311	6.09241	1	12	313.837
YLR374C	12	311.8	5.01011	1	12	313.889
YLR389C	12	327	15.8603	1	12	324.951
YLR407W	12	327	6.71066	1	12	335.839
YLR411W	12	340	30.5524	1	12	340.985
YLR396C	12	341	5.40985	1	12	328.415
YLR397C	12	341	9.07462	1	12	329.342
YLR413W	12	341	6.4531	1	12	342.391
YLR424W	12	349	5.07828	1	12	350.403
YLR430W	12	355.6	10.2996	1	12	357.623
YLR433C	12	355.6	4.91915	1	12	362.153
YLR446W	12	368	5.67877	1	12	369.073
YHR185C	12	371	6.18995	0	8	142.602
YDR545C-A	12	376	6.02989	0	4	474.696
YHL050W-A	12	376	5.57471	0	8	0.212564
YBL111C	12	376.1	4.08464	0	2	1.20149
YBL113C	12	376.1	4.91358	0	2	0.764066
YBL113W-A	12	376.1	6.4424	0	2	0.160431
YDR545W	12	376.1	4.99477	0	4	473.139
YEL075W-A	12	376.1	4.18299	0	5	1.68499
YEL077W-A	12	376.1	4.3907	0	5	0.201079
YER190C-B	12	376.1	5.93155	0	5	201.623
YER190W	12	376.1	4.73719	0	5	199.985
YFL066C	12	376.1	4.54354	0	6	1.21715
YFL068W	12	376.1	6.60576	0	6	-0.0132554
YGR296C-B	12	376.1	5.41918	0	7	403.375
YGR296W	12	376.1	4.50186	0	7	401.391
YHL050C	12	376.1	5.42825	0	8	0.538511
YHR219C-A	12	376.1	5.6497	0	8	168.549
YHR219W	12	376.1	5.53186	0	8	168.097
YIL177C	12	376.1	4.1255	0	9	2.05285
YIL177W-A	12	376.1	4.19601	0	9	0.364134
YJL225W-A	12	376.1	4.81337	0	10	0.280759
YLL066C	12	376.1	5.45276	0	12	3.35931
YLL066W-A	12	376.1	5.6775	0	12	2.29214
YLL067C	12	376.1	5.04457	0	12	1.36647
YLL067W-A	12	376.1	6.61307	0	12	0.260414
YLR456W	12	376.1	5.84253	1	12	379.828
YLR457C	12	376.1	13.6206	1	12	380.44
YLR459W	12	376.1	5.889	1	12	380.643
YLR465C	12	376.1	5.46762	1	12	384.25
YLR466C-A	12	376.1	5.96492	1	12	385.516
YLR466C-B	12	376.1	6.43748	1	12	385.819
YLR466W	12	376.1	5.52262	1	12	384.154
YLR467C-A	12	376.1	5.53809	1	12	387.915
YLR467W	12	376.1	5.24735	1	12	386.106
YML133C	12	376.1	4.70004	0	13	1.26074
YML133W-B	12	376.1	5.72014	0	13	0.252804
YNL339C	12	376.1	4.63164	0	14	2.1885
YNL339W-B	12	376.1	5.33292	0	14	0.265709
YOR396C-A	12	376.1	4.98116	0	15	359.855
YOR396W	12	376.1	5.52947	0	15	358.197
YPL283C	12	376.1	4.99532	0	16	1.67518
YPL283W-B	12	376.1	5.44453	0	16	0.167673
YPR204C-A	12	376.1	5.02269	0	16	274.776
YPR204W	12	376.1	5.25042	0	16	273.983
YAR069C	13	9.6	5.79382	0	1	100.914
YAR070C	13	9.6	9.60763	0	1	101.165
YAR071W	13	9.6	13.5363	0	1	101.434
YBR028C	13	9.6	4.22576	0	2	88.8127
YBR092C	13	9.6	4.3401	0	2	128.716
YBR093C	13	9.6	13.6054	0	2	129.272
YBR296C	13	9.6	11.0919	0	2	239.535
YCR011C	13	9.6	4.0791	0	3	65.7042
YDR061W	13	9.6	4.21141	0	4	177.98
YDR247W	13	9.6	6.12575	0	4	296.327
YDR281C	13	9.6	14.6214	0	4	316.902
YDR481C	13	9.6	10.4171	0	4	440.251
[truncated: 1,298 more rows]

## Sheet: Combined EtoH Abundance
UID	peaks.chr	peaks.pos	peaks.lod	cis (+/- 20 cM)	trait.chr	trait.pos															peaks.chr	peaks.pos	peaks.lod	cis	trait.chr	trait.pos
YAL049C	1	12.7	10.7484	1	1	23.6662															16	123.3	4.46887	0	17	NA
YAL058W	1	12.7	5.42255	1	1	16.8434															10	192.4	4.94085	0	17	NA
YAL062W	1	12.7	9.43511	1	1	14.1844															10	195.9	4.08512	0	17	NA
YAL064W-B	1	12.7	30.2021	1	1	5.39648															12	222	3.98258	0	17	NA
YAL065C	1	12.7	18.4575	1	1	5.35373															15	37.1	4.27993	0	17	NA
YAL067C	1	12.7	8.58285	1	1	4.0329															10	195.4	5.16616	0	17	NA
YAR060C	1	12.7	15.7151	0	1	97.8486															14	155.6	4.25157	0	17	NA
YAR061W	1	12.7	4.12757	0	1	98.1402															7	151.9	4.29009	0	1	67.9327
YKL182W	1	12.7	3.98057	0	11	38.2388															14	180.6	6.48077	0	1	67.9327
YOR318C	1	12.7	7.86003	0	15	300.983															1	61.7	10.0753	1	1	63.9622
YAR053W	1	13.7	7.32754	0	1	93.7421															4	373.3	4.14517	0	1	62.2421
YHR213W-B	1	16.7	4.94243	0	8	162.282															5	123.6	4.59809	0	1	61.5993
YDR243C	1	17.7	15.0406	0	4	294.551															16	233.3	4.69689	0	1	61.1231
YNR016C	1	17.7	9.50066	0	14	244.735															1	38.7	5.42928	1	1	56.2778
YOL101C	1	17.7	7.88973	0	15	42.221															14	177.6	6.59663	0	1	54.1017
YJR145C	1	18.7	4.72354	0	10	210.817															1	41.7	7.50189	1	1	54.1017
YAL061W	1	19.7	5.41704	1	1	15.0326															5	119.6	4.16572	0	1	51.5816
YDR124W	1	19.7	4.236	0	4	217.123															14	179.6	4.66294	0	1	49.7015
YML115C	1	19.7	5.19203	0	13	14.1934															1	38.2	8.99141	1	1	43.1397
YPR128C	1	20.7	8.32714	0	16	229.758															5	103.6	4.85648	0	1	42.6294
YDR118W-A	1	21.7	5.77427	0	4	213.232															1	44.7	6.4741	1	1	42.6294
YGL253W	1	21.7	4.66056	0	7	8.83845															12	233	10.0545	0	1	41.8266
YGR264C	1	22.7	4.12343	0	7	378.073															14	184.6	6.49707	0	1	39.1901
YKL080W	1	22.7	4.02654	0	11	108.17															14	159.6	6.00251	0	1	37.2436
YJL026W	1	23.7	5.06913	0	10	117.707															13	266.6	4.2009	0	1	33.1006
YDR212W	1	25.7	5.17285	0	4	275.001															14	168	5.44028	0	1	33.327
YDR487C	1	30.7	5.03554	0	4	442.95															13	18.6	4.8568	0	1	26.3117
YKL106W	1	33.7	4.59722	0	11	90.1073															14	129.6	4.62141	0	1	25.886
YAL026C-A	1	38.2	8.99141	1	1	43.1397															13	23.6	4.97748	0	1	25.886
YAL016C-A	1	38.7	5.42928	1	1	56.2778															7	133.9	4.92044	0	1	25.588
YAL017W	1	41.7	7.50189	1	1	54.1017															1	12.7	10.7484	1	1	23.6662
YAL027W	1	44.7	6.4741	1	1	42.6294															14	168	11.5118	0	1	21.8486
YLR088W	1	48.7	4.15808	0	12	113.837															8	16.3	4.72697	0	1	20.6469
YAR008W	1	55.7	6.15424	1	1	71.5145															5	35.6	6.41846	0	1	20.2514
YJR015W	1	58.7	5.88127	0	10	138.853															1	12.7	5.42255	1	1	16.8434
YAL003W	1	61.7	10.0753	1	1	63.9622															1	19.7	5.41704	1	1	15.0326
YAR002W	1	66.3	7.23904	1	1	68.4957															1	12.7	9.43511	1	1	14.1844
YAR023C	1	73.7	9.65604	1	1	80.8982															1	87.7	22.2136	0	1	12.5618
YAR031W	1	74.7	8.39243	1	1	84.0538															8	121.2	4.10886	0	1	5.39648
YFL020C	1	74.7	8.63799	0	6	47.7785															1	12.7	30.2021	1	1	5.39648
YAR035W	1	76.7	4.95791	1	1	85.5646															1	12.7	18.4575	1	1	5.35373
YGL051W	1	77.7	13.3836	0	7	149.387															1	12.7	8.58285	1	1	4.0329
YAR033W	1	78.7	16.7455	1	1	84.6258															14	275.5	6.02315	0	1	0.951098
YAR027W	1	79.7	24.0797	1	1	82.674															5	188.6	9.81393	0	1	0.217101
YAR030C	1	79.7	16.755	1	1	84.0615															5	190.9	10.7298	0	1	0.125745
YLR364W	1	79.7	4.15796	0	12	307.487															7	112.9	4.65202	0	1	69.6059
YAR028W	1	81.7	23.1393	1	1	83.179															1	66.3	7.23904	1	1	68.4957
YAR029W	1	81.7	19.676	1	1	83.8221															1	55.7	6.15424	1	1	71.5145
YIR019C	1	81.7	4.91526	0	9	177.175															14	170.6	5.41415	0	1	77.2439
YAL063C	1	87.7	22.2136	0	1	12.5618															14	170.6	4.75877	0	1	78.7898
YAR047C	1	87.7	21.4839	1	1	90.7818															1	73.7	9.65604	1	1	80.8982
YAR050W	1	87.7	17.6661	1	1	91.5081															1	79.7	24.0797	1	1	82.674
YIL074C	1	87.7	5.02441	0	9	100.072															4	180.9	4.5382	0	1	83.179
YBR068C	2	10.1	4.46723	0	2	112.711															7	268.9	5.36282	0	1	83.179
YBR132C	2	10.1	4.40369	0	2	150.458															1	81.7	23.1393	1	1	83.179
YCR105W	2	10.1	5.70373	0	3	148.337															7	267.9	4.25068	0	1	83.8221
YCR106W	2	10.1	5.14757	0	3	149.243															1	81.7	19.676	1	1	83.8221
YER157W	2	10.1	4.25425	0	5	169.682															1	79.7	16.755	1	1	84.0615
YOL129W	2	10.1	4.10559	0	15	25.5913															4	270.3	4.40097	0	1	84.0538
YOR100C	2	10.1	4.26036	0	15	169.738															7	148.9	5.10501	0	1	84.0538
YBL101C	2	12.1	13.9528	1	2	8.45681															1	74.7	8.39243	1	1	84.0538
YKL001C	2	12.1	6.57203	0	11	166.816															7	283.9	4.27492	0	1	84.6258
YLR297W	2	16.1	4.25531	0	12	260.655															1	78.7	16.7455	1	1	84.6258
YGR287C	2	17.1	4.60732	0	7	395.518															1	76.7	4.95791	1	1	85.5646
YBL093C	2	21.1	3.98653	1	2	13.4485															14	171.6	9.88616	0	1	86.6564
YBL074C	2	22.1	4.66378	1	2	26.3362															1	87.7	21.4839	1	1	90.7818
YPL088W	2	24.1	4.28445	0	16	110.804															1	87.7	17.6661	1	1	91.5081
YBL084C	2	29.1	3.97714	1	2	20.8215															1	13.7	7.32754	0	1	93.7421
YBL058W	2	31.1	7.35022	1	2	33.4446															8	154.3	4.43142	0	1	97.8486
YJR110W	2	32.1	4.14409	0	10	190.079															1	12.7	15.7151	0	1	97.8486
YJR035W	2	33.1	4.1229	0	10	149.223															1	12.7	4.12757	0	1	98.1402
YLR189C	2	33.1	4.14369	0	12	192.411															9	13.9	6.80795	0	1	100.06
YBL044W	2	39.1	18.4118	1	2	40.8262															13	9.6	8.08074	0	1	100.914
YBL011W	2	58.1	9.29188	1	2	61.0464															13	9.6	6.19772	0	1	101.165
YBL015W	2	58.1	8.7639	1	2	58.2317															13	9.6	11.0728	0	1	101.434
YBR006W	2	59.1	9.55069	1	2	74.0898															12	224	4.51711	0	1	102.461
YDR170W-A	2	60.1	12.0514	0	4	249.023															8	153.3	5.53687	0	1	102.461
YKR062W	2	60.1	4.27826	0	11	212.492															14	161.6	5.20077	0	2	70.9293
YLR308W	2	62.1	3.98538	0	12	269.276															8	54.3	3.97715	0	2	62.8744
YOR258W	2	64.9	4.11667	0	15	267.875															14	173.6	5.20587	0	2	62.8744
YBR020W	2	74.1	14.8047	1	2	83.7091															2	58.1	9.29188	1	2	61.0464
YBR013C	2	76.1	17.0488	1	2	79.7597															2	58.1	8.7639	1	2	58.2317
YBR012C	2	78.1	5.87155	1	2	77.8619															11	106.6	4.46075	0	2	54.7279
YBR026C	2	88.1	18.8704	1	2	88.2167															5	119.6	4.59905	0	2	54.7279
YLR074C	2	96.1	4.33261	0	12	101.713															14	164.6	4.94855	0	2	53.2706
YBR063C	2	99.1	8.6449	1	2	110.468															5	122.6	5.08164	0	2	49.458
YDR282C	2	99.1	4.10586	0	4	317.655															5	46.6	6.6988	0	2	49.8651
YBR065C	2	100.1	14.9626	1	2	110.914															14	168	5.51209	0	2	43.8884
YBR066C	2	100.1	6.69388	1	2	111.219															8	20.3	4.7858	0	2	43.0487
YGL068W	2	102.1	4.31747	0	7	138.807															2	39.1	18.4118	1	2	40.8262
YER170W	2	103.1	4.68271	0	5	184.071															13	284.6	4.08404	0	2	37.4486
YBR042C	2	103.4	4.57315	1	2	96.5091															5	121.6	5.56003	0	2	34.048
YDL044C	2	103.4	4.96503	0	4	116.35															16	259.3	5.65309	0	2	33.4446
YDR308C	2	103.4	4.16917	0	4	334.282															2	31.1	7.35022	1	2	33.4446
YDR493W	2	103.4	4.34145	0	4	445.187															8	38.3	7.23313	0	2	32.2331
YGR245C	2	103.4	4.04218	0	7	363.364															11	129.6	5.19303	0	2	30.3548
YHR005C-A	2	103.4	4.14174	0	8	34.7696															2	22.1	4.66378	1	2	26.3362
YHR059W	2	103.4	3.97418	0	8	66.04															7	123.9	5.45208	0	2	25.933
YIL047C	2	103.4	4.1495	0	9	120.489															14	168	4.31705	0	2	22.3997
YJR100C	2	103.4	4.10674	0	10	185.18															2	29.1	3.97714	1	2	20.8215
YKL003C	2	103.4	4.4692	0	11	166.098															14	167.6	6.16995	0	2	14.623
YMR225C	2	103.4	4.24873	0	13	245.185															2	21.1	3.98653	1	2	13.4485
YBR044C	2	104.1	5.06454	1	2	97.8463															14	200.6	3.99194	0	2	13.2017
YBR062C	2	107.1	5.8092	1	2	109.965															4	363.3	4.45996	0	2	13.2017
YMR002W	2	107.1	4.24701	0	13	92.5054															2	166.1	4.93821	0	2	12.9552
YGL109W	2	108.1	4.43513	0	7	112.322															4	93.3	4.10346	0	2	11.0842
YGL052W	2	109.1	4.09801	0	7	149.295															2	12.1	13.9528	1	2	8.45681
YJR038C	2	110.1	4.09134	0	10	151.234															13	19.6	4.63413	0	2	4.13056
YMR006C	2	112.1	4.01097	0	13	95.0512															14	168	4.78212	0	2	3.1321
YIL120W	2	113.1	3.96461	0	9	60.4596															14	275.5	5.67166	0	2	2.28665
YBR111C	2	114.1	4.22313	0	2	138.565															15	347.3	4.35558	0	2	1.70372
YBR090C	2	116.1	5.84593	1	2	127.939															12	376.1	5.34749	0	2	0.160431
YOL126C	2	117.1	4.08923	0	15	27.366															5	123.6	8.02238	0	2	72.3687
YBR234C	2	121.2	4.76648	0	2	206.005															14	168.6	7.05733	0	2	72.8273
YBR085C-A	2	126.1	5.10903	1	2	125.729															8	21.3	5.19887	0	2	73.758
YBR107C	2	128.1	11.3495	1	2	136.359															2	59.1	9.55069	1	2	74.0898
YHR182W	2	128.1	4.7962	0	8	140.459															2	78.1	5.87155	1	2	77.8619
YBR087W	2	130.1	13.8769	1	2	127.112															2	76.1	17.0488	1	2	79.7597
YBR106W	2	130.1	8.3575	1	2	135.796															8	19.3	6.02459	0	2	81.0723
YBR103W	2	133.1	11.8214	1	2	134.308															14	177.6	7.01109	0	2	82.659
YBR119W	2	139.1	13.7285	1	2	143.815															2	74.1	14.8047	1	2	83.7091
YOL076W	2	144.1	3.99168	0	15	61.6879															14	120.6	4.59214	0	2	85.1266
YHR063C	2	145.1	4.0137	0	8	67.554															2	88.1	18.8704	1	2	88.2167
YBR094W	2	146.1	13.9866	1	2	129.598															13	9.6	4.06552	0	2	88.8127
YDL138W	2	148.1	5.21185	0	4	66.1003															8	21.3	4.70454	0	2	89.501
YBR098W	2	150.1	8.56554	1	2	132.447															4	93.3	4.28082	0	2	90.5986
YBR144C	2	158.8	4.08045	1	2	160.101															2	211.1	4.16795	0	2	91.8104
YBR149W	2	161.1	9.68062	1	2	162.025															14	168	4.27142	0	2	93.456
YBR148W	2	162.1	4.37714	1	2	161.394															2	103.4	4.57315	1	2	96.5091
YOR342C	2	162.1	4.18069	0	15	319.317															14	54.9	4.15266	0	2	97.2112
YBL095W	2	166.1	4.93821	0	2	12.9552															7	336.9	4.12607	0	2	97.8463
YJR146W	2	166.1	4.57378	0	10	211.142															2	104.1	5.06454	1	2	97.8463
YPR105C	2	166.1	6.08537	0	16	214.51															14	168	12.8908	0	2	97.8463
YBR137W	2	167.1	5.88404	1	2	153.945															5	136.6	4.0225	0	2	102.968
YGR067C	2	167.1	4.15158	0	7	231.144															14	185.6	5.87353	0	2	102.968
YNL277W-A	2	167.1	5.23725	0	14	43.2011															7	156.9	6.42102	0	2	104.226
YBR158W	2	169.1	16.7297	1	2	166.977															15	278.1	4.10052	0	2	105.466
YJR147W	2	169.1	7.56191	0	10	211.235															7	140.9	4.91112	0	2	109.965
YBR157C	2	170.1	8.67759	1	2	166.307															12	236	5.03694	0	2	109.965
YDR274C	2	170.1	4.3371	0	4	313.694															2	107.1	5.8092	1	2	109.965
YGL028C	2	170.1	15.7318	0	7	163.897															2	99.1	8.6449	1	2	110.468
YGR044C	2	170.1	4.51078	0	7	216.051															14	168	6.49043	0	2	110.914
YNL028W	2	170.1	4.7778	0	14	214.079															2	100.1	14.9626	1	2	110.914
YNL327W	2	170.1	9.38985	0	14	8.89106															2	100.1	6.69388	1	2	111.219
YOR264W	2	170.1	9.5767	0	15	270.251															15	267.1	4.28607	0	2	111.828
YER152C	2	171.1	5.62464	0	5	165.909															12	93	6.93317	0	2	111.828
YHR143W	2	171.1	14.2116	0	8	115.689															2	10.1	4.46723	0	2	112.711
YKL185W	2	171.1	4.98464	0	11	35.8895															5	115.6	4.77039	0	2	117.099
YML026C	2	171.1	4.27797	0	13	75.9198															13	98.6	4.04808	0	2	117.673
YNL066W	2	171.1	14.2381	0	14	186.195															14	180.6	4.7359	0	2	117.921
YNR067C	2	171.1	11.7701	0	14	280.846															7	154.9	4.08878	0	2	121.548
YBR166C	2	172.1	8.72545	1	2	171.357															14	179.6	4.69445	0	2	121.548
YEL008W	2	172.1	4.55077	0	5	49.2287															2	126.1	5.10903	1	2	125.729
YER124C	2	172.1	12.9516	0	5	143.202															4	91.3	4.16774	0	2	124.773
YLR035C	2	172.1	4.2092	0	12	77.1977															12	234	11.2015	0	2	124.773
YLR286C	2	172.1	12.38	0	12	255.634															7	130.9	5.0854	0	2	126.895
YNL078W	2	172.1	7.54309	0	14	177.869															2	130.1	13.8769	1	2	127.112
YGR041W	2	173.1	15.4773	0	7	213.687															2	116.1	5.84593	1	2	127.939
YJL078C	2	173.1	12.8866	0	10	88.1709															13	17.6	5.26818	0	2	128.716
YPR106W	2	173.1	6.01791	0	16	214.653															13	9.6	13.7198	0	2	129.272
YBR173C	2	176.1	7.21418	1	2	174.637															2	146.1	13.9866	1	2	129.598
YBR174C	2	177.1	16.6841	1	2	174.78															14	168	13.1045	0	2	131.075
YDL055C	2	177.5	4.32208	0	4	110.591															2	150.1	8.56554	1	2	132.447
YDL118W	2	177.5	5.4004	0	4	76.6619															2	133.1	11.8214	1	2	134.308
YPR013C	2	177.5	3.97415	0	16	169.808															14	178.6	5.84353	0	2	135.796
YDR257C	2	178.1	4.14361	0	4	301.127															2	130.1	8.3575	1	2	135.796
YJL032W	2	179.1	5.3626	0	10	115.894															2	128.1	11.3495	1	2	136.359
YBR188C	2	180.1	6.97284	1	2	181.214															14	170.6	7.34668	0	2	136.446
YBR193C	2	180.1	10.031	1	2	182.911															2	114.1	4.22313	0	2	138.565
YBR210W	2	180.1	5.96687	1	2	193.67															5	129.6	4.94742	0	2	142.188
YBR245C	2	180.1	4.5923	0	2	213.502															7	130.9	4.18504	0	2	143.815
YLR348C	2	180.1	4.11201	0	12	298.043															2	139.1	13.7285	1	2	143.815
YFL004W	2	181.1	4.73227	0	6	63.232															14	163.6	4.25783	0	2	144.291
YIL002C	2	181.1	4.72518	0	9	159.082															14	162.6	4.9978	0	2	145.367
YBR197C	2	182.1	5.76797	1	2	184.745															5	106.6	4.1048	0	2	146.532
YBR175W	2	186.1	5.20286	1	2	174.707															13	58.6	5.33661	0	2	146.532
YBR211C	2	187.1	4.23963	1	2	194.145															12	112	5.06013	0	2	147.867
YDL127W	2	190.1	4.54248	0	4	72.8112															5	44.6	3.98863	0	2	149.172
YOR301W	2	191.1	5.1658	0	15	290.717															14	162.6	4.54635	0	2	149.172
YCL037C	2	197.1	4.6142	0	3	28.1505															2	10.1	4.40369	0	2	150.458
YBR237W	2	198.1	4.44686	1	2	207.621															13	9.6	4.09502	0	2	151.313
YBR203W	2	199.1	8.56348	1	2	188.746															14	169.6	11.1793	0	2	151.728
YKR022C	2	199.1	4.16985	0	11	183.425															2	167.1	5.88404	1	2	153.945
YFL022C	2	201.1	4.74313	0	6	45.5777															14	172.6	4.1972	0	2	158.028
YBR230W-A	2	202.1	7.91461	1	2	204.132															4	394.3	5.21569	0	2	158.451
YKR079C	2	202.1	4.8114	0	11	223.769															2	158.8	4.08045	1	2	160.101
YJR016C	2	203.1	5.01079	0	10	139.898															14	168	9.80946	0	2	160.612
YBR218C	2	206.1	4.12674	1	2	198.689															2	162.1	4.37714	1	2	161.394
YDL084W	2	206.1	4.75662	0	4	94.6244															2	161.1	9.68062	1	2	162.025
YLR409C	2	210.1	4.08297	0	12	337.375															4	45.3	4.01868	0	2	163.532
YPL086C	2	210.1	4.17587	0	16	112.099															11	135.6	5.18933	0	2	163.532
YBR034C	2	211.1	4.16795	0	2	91.8104															14	168	5.53646	0	2	164.259
YBR249C	2	211.1	7.55085	1	2	215.442															2	170.1	8.67759	1	2	166.307
YLR230W	2	212.1	4.37236	0	12	217.656															2	169.1	16.7297	1	2	166.977
YMR229C	2	212.1	4.15184	0	13	248.554															14	184.6	4.22965	0	2	168.032
YBR253W	2	213.1	4.88173	1	2	217.019															16	111	4.81212	0	2	169.719
YDR496C	2	213.1	4.25713	0	4	447.414															12	227	4.90363	0	2	169.719
YKL009W	2	214.1	4.26811	0	11	161.831															2	172.1	8.72545	1	2	171.357
YBR246W	2	216.1	5.88526	1	2	213.518															14	175.6	5.22272	0	2	172.791
YBR252W	2	218.1	4.63188	1	2	216.822															2	176.1	7.21418	1	2	174.637
YBR256C	2	218.1	7.28455	1	2	218.464															2	177.1	16.6841	1	2	174.78
YBR259W	2	226.1	5.14573	1	2	219.147															5	118.6	4.39976	0	2	174.707
YBR298C	2	231.1	7.06137	1	2	241.321															2	186.1	5.20286	1	2	174.707
YGR292W	2	233.8	4.20643	0	7	398.333															5	134.6	10.1301	0	2	175.83
YCL049C	3	15.9	19.8373	1	3	19.5309															7	336.9	4.09203	0	2	176.712
YMR180C	3	15.9	4.42129	0	13	211.914															12	235	11.8579	0	2	178.644
YOR032W-A	3	18.9	4.80187	0	15	129.4															12	237	8.64363	0	2	178.812
YLR459W	3	21.9	4.15995	0	12	380.643															14	168	6.24512	0	2	179.968
YDR434W	3	23.9	4.657	0	4	412.657															2	180.1	6.97284	1	2	181.214
YDR232W	3	26.9	4.18524	0	4	287.471															14	168	6.21768	0	2	182.28
YOR002W	3	26.9	4.59952	0	15	108.697															2	180.1	10.031	1	2	182.911
YDR203W	3	27.9	4.4419	0	4	265.874															9	69.1	5.87682	0	2	183.551
YGR225W	3	27.9	4.45827	0	7	349.735															2	182.1	5.76797	1	2	184.745
YGR284C	3	27.9	4.08078	0	7	392.779															14	171.6	6.03092	0	2	186.253
YHR064C	3	27.9	3.9768	0	8	68.1439															16	16.3	4.14005	0	2	187.403
YBR238C	3	28.9	4.65396	0	2	209.224															12	227	6.63967	0	2	187.403
YCL002C	3	28.9	4.49301	0	3	53.543															14	168.6	7.18502	0	2	187.726
YKL121W	3	28.9	4.83683	0	11	81.2106															2	199.1	8.56348	1	2	188.746
YLL042C	3	29.9	4.48287	0	12	18.8892															15	168.6	4.39046	0	2	190.012
YGL256W	3	32.9	4.62957	0	7	5.59129															14	155.6	4.18607	0	2	190.543
YMR013C-A	3	32.9	4.44565	0	13	100.812															14	161.6	4.17425	0	2	192.666
YNR039C	3	32.9	4.274	0	14	258.798															13	20.6	5.74747	0	2	192.666
YIL102C-A	3	33.9	5.03927	0	9	78.0865															2	180.1	5.96687	1	2	193.67
YLR293C	3	33.9	4.34535	0	12	259.711															2	187.1	4.23963	1	2	194.145
YCL026C-B	3	34.9	6.87131	1	3	35.4998															14	170.6	5.68424	0	2	194.145
YDR348C	3	34.9	5.03856	0	4	363.27															7	118.9	4.44166	0	2	194.372
YJR139C	3	35.9	5.1397	0	10	207.143															14	271.6	5.49162	0	2	195.433
YJR117W	3	36.9	4.53918	0	10	192.605															2	206.1	4.12674	1	2	198.689
YMR205C	3	36.9	4.04288	0	13	229.434															14	171.6	5.41898	0	2	198.689
YBR239C	3	38.9	4.08967	0	2	210.017															5	117.6	4.0742	0	2	199.418
YCL017C	3	40.9	12.2245	1	3	45.2389															13	22.6	4.20374	0	2	200.523
YLR259C	3	40.9	5.15442	0	12	239.372															14	169.6	7.55401	0	2	201.207
YCL021W-A	3	41.9	21.6795	1	3	40.125															2	202.1	7.91461	1	2	204.132
YCR052W	3	43.9	6.13827	0	3	103.214															5	139.6	6.54036	0	2	204.952
YEL017C-A	3	43.9	5.59288	0	5	43.0561															2	121.2	4.76648	0	2	206.005
YKR090W	3	43.9	4.00841	0	11	231.251															7	107.9	4.64452	0	2	206.098
YCR007C	3	45.9	5.56373	1	3	60.8315															14	263.6	4.47105	0	2	207.538
YCL004W	3	46.9	12.4503	1	3	52.3655															2	198.1	4.44686	1	2	207.621
YCR024C-B	3	56.9	6.39346	0	3	78.1875															7	339.9	4.3564	0	2	209.224
YDR233C	3	56.9	4.29976	0	4	288.372															3	28.9	4.65396	0	2	209.224
YCL008C	3	57.9	5.96866	1	3	51.2837															5	120.6	5.31795	0	2	209.224
YCR019W	3	63.9	10.2387	1	3	73.3732															3	38.9	4.08967	0	2	210.017
YFL026W	3	68.9	6.59529	0	6	39.6108															12	231	7.60839	0	2	211.438
YKL178C	3	69.9	7.27357	0	11	43.551															7	112.9	4.26059	0	2	212.076
YKL209C	3	69.9	7.58922	0	11	17.6129															2	180.1	4.5923	0	2	213.502
YNL146C-A	3	69.9	6.80175	0	14	130.103															2	216.1	5.88526	1	2	213.518
YNL145W	3	70.9	6.97688	0	14	130.411															5	95.6	5.22284	0	2	214.983
YPL187W	3	70.9	7.81494	0	16	56.1371															2	211.1	7.55085	1	2	215.442
YGL089C	3	71.9	6.86769	0	7	127.734															14	168	4.74568	0	2	216.457
YCR018C	3	72.9	37.5804	1	3	71.4833															2	218.1	4.63188	1	2	216.822
YCR040W	3	72.9	8.03329	0	3	96.2277															2	213.1	4.88173	1	2	217.019
YCL066W	3	73.9	8.0913	0	3	6.35794															2	218.1	7.28455	1	2	218.464
YCR020C	3	74.8	23.809	1	3	74.2485															2	226.1	5.14573	1	2	219.147
YCR020W-B	3	74.8	13.0865	1	3	74.566															5	119.6	4.04866	0	2	220.904
YCR097W	3	75.9	7.07109	0	3	141.024															14	168	4.37525	0	2	222.409
YJR004C	3	75.9	5.78154	0	10	133.478															4	397.3	4.00657	0	2	223.471
YLR040C	3	76.9	6.05139	0	12	82.6517															14	167.6	13.5092	0	2	228.012
YGL032C	3	79.9	6.52681	0	7	161.649															14	168	5.68731	0	2	230.463
YIL015W	3	79.9	7.29485	0	9	145.079															7	129.9	4.52055	0	2	231.113
YCR097W-A	3	81.9	5.17085	0	3	141.314															5	120.6	4.96309	0	2	232.161
YJL170C	3	81.9	5.4806	0	10	30.5308															14	275.5	4.25766	0	2	232.394
YCR083W	3	124.9	4.43381	1	3	124.594															7	121.9	4.95792	0	2	232.953
YOR394W	3	128.9	4.45897	0	15	357.287															14	159.6	9.29434	0	2	233.879
YCR104W	3	129.9	6.35192	1	3	147.728															4	66.6	4.066	0	2	236.749
YCR106W	3	129.9	7.62256	1	3	149.243															7	280.9	4.15441	0	2	236.749
YCR107W	3	129.9	8.43734	0	3	150.65															15	320.1	4.67796	0	2	236.749
YMR325W	3	131.9	4.54324	0	13	313.723															13	9.6	9.46001	0	2	239.535
YPL282C	3	131.9	5.80414	0	16	2.42559															4	236.3	4.24852	0	2	241.321
YOL031C	3	132.9	4.05804	0	15	88.2784															7	391.5	4.67914	0	2	241.321
YCR099C	3	137	18.6655	1	3	144.607															2	231.1	7.06137	1	2	241.321
YCR100C	3	137	18.6829	1	3	145.049															14	183.6	4.38507	0	2	242.708
YCR101C	3	137	23.6843	1	3	145.438															9	24.9	5.4553	0	2	243.422
YER087C-B	3	137	4.66988	0	5	116.504															3	28.9	4.49301	0	3	53.543
YLR207W	3	137	5.1865	0	12	200.487															7	109.9	5.23401	0	3	53.543
YML029W	3	137	4.15239	0	13	73.8751															3	46.9	12.4503	1	3	52.3655
YDL231C	4	9.3	9.0377	1	4	13.0582															3	57.9	5.96866	1	3	51.2837
YOR212W	4	11.3	4.32152	0	15	245.173															5	130.7	4.32995	0	3	50.6568
YDL233W	4	13.3	5.70868	1	4	11.3673															14	172.6	5.05303	0	3	48.776
YDL211C	4	21.3	4.62643	1	4	24.906															3	40.9	12.2245	1	3	45.2389
YDL207W	4	30.3	6.4376	1	4	27.3384															3	41.9	21.6795	1	3	40.125
YLR026C	4	31.3	4.14784	0	12	70.7133															13	9.6	4.20502	0	3	37.9848
YLR321C	4	31.3	4.2323	0	12	280.038															3	34.9	6.87131	1	3	35.4998
YHR109W	4	32.3	4.14366	0	8	99.0889															5	92.6	4.55381	0	3	32.7858
YOR362C	4	32.3	4.16014	0	15	336.192															7	126.9	4.21202	0	3	30.4372
YCR023C	4	33.3	4.19977	0	3	76.9911															4	377.3	5.41562	0	3	30.3609
YPR199C	4	33.3	4.05637	0	16	272.367															2	197.1	4.6142	0	3	28.1505
YJL093C	4	36.3	4.13721	0	10	77.0195															14	193.6	4.46722	0	3	25.2541
YIL132C	4	39.3	3.98118	0	9	45.1869															3	15.9	19.8373	1	3	19.5309
YDL088C	4	41.3	4.77204	0	4	93.0055															5	139.6	6.62234	0	3	16.9716
YDL103C	4	41.3	6.56239	0	4	85.7607															14	154.6	7.5166	0	3	16.9716
YLR413W	4	41.3	4.90196	0	12	342.391															4	392.3	4.07864	0	3	15.0782
YDL155W	4	42.3	5.77248	1	4	54.7757															14	163.6	4.11912	0	3	11.8713
YBR151W	4	45.3	4.01868	0	2	163.532															15	165.1	4.01623	0	3	11.4935
YDL169C	4	46.7	7.01428	1	4	49.1911															5	137.6	4.99419	0	3	10.5935
YDL168W	4	49.3	25.8436	1	4	49.4601															14	132.6	5.324	0	3	10.5935
YKL030W	4	50.3	4.62245	0	11	145.235															4	159.3	4.07005	0	3	8.08501
YFR030W	4	57.3	4.49926	0	6	102.385															3	73.9	8.0913	0	3	6.35794
YGL157W	4	58.3	4.24613	0	7	77.3331															11	240.8	5.64098	0	3	1.33803
YDL123W	4	60.3	4.34552	1	4	74.831															13	282	4.57842	0	3	56.8049
YFR007W	4	62.3	4.30727	0	6	76.4192															7	341.9	4.31151	0	3	56.9355
YDL124W	4	65.3	7.58511	1	4	74.4703															14	168	7.20007	0	3	56.9355
YDL142C	4	66.3	5.11481	1	4	62.7625															12	245	4.23733	0	3	58.7168
YBR294W	4	66.6	4.066	0	2	236.749															13	59.6	4.37883	0	3	58.7168
YDR502C	4	66.6	4.48697	0	4	450.847															14	175.6	5.50839	0	3	58.7168
YEL024W	4	66.6	4.18002	0	5	37.5554															14	168	9.46303	0	3	59.0411
YGR183C	4	66.6	4.11828	0	7	317.917															3	45.9	5.56373	1	3	60.8315
YHR094C	4	66.6	7.88382	0	8	87.7544															14	173.6	8.49731	0	3	65.7042
YML058W-A	4	66.6	4.03683	0	13	53.9898															3	72.9	37.5804	1	3	71.4833
YDR529C	4	72.3	4.52988	0	4	463.911															3	63.9	10.2387	1	3	73.3732
YDL102W	4	79.3	5.35859	1	4	85.8507															14	77.2	4.05644	0	3	74.2485
YDL176W	4	80.3	4.38897	0	4	44.0359															3	74.8	23.809	1	3	74.2485
YOR047C	4	86.3	5.07508	0	15	137.814															3	74.8	13.0865	1	3	74.566
YDL098C	4	90.3	7.70143	1	4	88.4159															14	177.6	11.5248	0	3	75.4232
YDL181W	4	90.3	4.11369	0	4	41.8908															4	33.3	4.19977	0	3	76.9911
YJR104C	4	90.3	4.71834	0	10	186.889															7	333.9	4.97685	0	3	77.8788
YML120C	4	90.3	4.23411	0	13	10.1087															14	168	9.03075	0	3	77.8788
YMR280C	4	90.3	4.28734	0	13	282.63															3	56.9	6.39346	0	3	78.1875
YBR085W	4	91.3	4.16774	0	2	124.773															5	114.6	3.98453	0	3	82.7766
YDL104C	4	91.3	4.94658	1	4	85.2334															8	27.4	4.79505	0	3	95.6761
YJR121W	4	91.3	4.53589	0	10	194.29															13	21.6	5.39929	0	3	95.6761
YDR018C	4	92.3	4.33468	0	4	150.016															3	72.9	8.03329	0	3	96.2277
YGR067C	4	92.3	4.79161	0	7	231.144															14	175.6	12.7556	0	3	98.6065
YGR204C-A	4	92.3	4.91249	0	7	336.413															13	9.6	4.99012	0	3	100.629
YBL099W	4	93.3	4.10346	0	2	11.0842															12	233	5.80443	0	3	101.742
YBR033W	4	93.3	4.28082	0	2	90.5986															3	43.9	6.13827	0	3	103.214
YKL217W	4	93.3	4.34576	0	11	8.48783															5	117.6	4.17913	0	3	107.645
YMR206W	4	93.3	4.09125	0	13	229.817															7	114.9	4.93298	0	3	113.443
YDL079C	4	94.3	4.01943	1	4	97.3485															14	168.6	8.30939	0	3	115.467
YDL080C	4	94.3	4.32241	1	4	96.862															12	233	6.6937	0	3	118.363
YGR161W-B	4	94.3	4.35825	0	7	300.324															14	168	4.48984	0	3	122.097
YKL093W	4	94.3	4.09362	0	11	100.472															3	124.9	4.43381	1	3	124.594
YLR092W	4	94.3	7.58629	0	12	116.517															12	251	5.85049	0	3	137.629
YFR038W	4	95.3	4.22247	0	6	110.112															3	75.9	7.07109	0	3	141.024
YKL148C	4	95.3	5.85669	0	11	65.0291															3	81.9	5.17085	0	3	141.314
YDL024C	4	127.3	9.46673	1	4	127.086															3	137	18.6655	1	3	144.607
YDL022C-A	4	128.3	11.2617	1	4	127.147															3	137	18.6829	1	3	145.049
YDL017W	4	139.3	4.87326	1	4	131.528															4	378.3	4.05606	0	3	145.438
YDR006C	4	139.3	29.4074	1	4	142.996															3	137	23.6843	1	3	145.438
YDL012C	4	140.3	18.109	1	4	133.749															3	129.9	6.35192	1	3	147.728
YDR009W	4	141.7	4.06947	1	4	143.675															7	9.9	4.07789	0	3	148.337
YDR010C	4	141.7	5.49306	1	4	144.28															2	10.1	5.70373	0	3	148.337
YJR120W	4	141.7	4.66816	0	10	194.145															4	376.3	4.55354	0	3	149.243
YDL007C-A	4	143.3	12.1478	1	4	135.433															2	10.1	5.14757	0	3	149.243
YDL131W	4	147.3	3.98625	0	4	70.4669															3	129.9	7.62256	1	3	149.243
YDL009C	4	148.3	4.90106	1	4	134.326															4	377.3	4.50246	0	3	150.65
YDR033W	4	148.3	11.7504	1	4	157.556															3	129.9	8.43734	0	3	150.65
YPL144W	4	149.3	4.71134	0	16	81.3524															5	190.9	8.80591	0	3	151.753
YDR034C	4	153.3	8.34312	1	4	158.786															4	143.3	12.1478	1	4	135.433
YDR027C	4	155.3	5.23443	1	4	154.194															4	148.3	4.90106	1	4	134.326
YHL005C	4	156.3	4.70618	0	8	29.7777															4	140.3	18.109	1	4	133.749
YDR038C	4	157.3	15.5151	1	4	164.556															7	125.9	4.00617	0	4	131.528
YLR142W	4	157.3	5.26076	0	12	153.034															4	139.3	4.87326	1	4	131.528
YDR039C	4	158.3	24.3057	1	4	165.762															15	51.1	4.39356	0	4	130.694
YCL064C	4	159.3	4.07005	0	3	8.08501															4	128.3	11.2617	1	4	127.147
YDR036C	4	159.3	29.5963	1	4	162.698															14	171.6	4.23404	0	4	127.695
YDR037W	4	159.3	23.727	1	4	162.924															4	127.3	9.46673	1	4	127.086
YDR066C	4	178.3	4.21367	1	4	180.553															7	302.9	4.14771	0	4	126.265
YAR028W	4	180.9	4.5382	0	1	83.179															10	128.4	3.99724	0	4	119.551
YDR085C	4	183.3	4.70808	1	4	191.008															5	128.6	7.68717	0	4	119.551
YDR089W	4	183.3	6.41065	1	4	192.861															12	168	11.846	0	4	117.331
YDR097C	4	206.3	13.4155	1	4	199.611															14	168	4.30161	0	4	116.35
YDR118W-A	4	208.3	21.4981	1	4	213.232															2	103.4	4.96503	0	4	116.35
YDR106W	4	212.3	6.42761	1	4	206.794															5	135.6	6.32444	0	4	113.424
YDR126W	4	213.3	10.5755	1	4	218.028															11	230.6	4.11653	0	4	113.096
YDR111C	4	214.3	5.93349	1	4	210.751															2	177.5	4.32208	0	4	110.591
YDR124W	4	214.3	16.644	1	4	217.123															14	168	5.93321	0	4	108.936
YDR135C	4	225.3	5.60137	1	4	225.568															14	175.6	7.40927	0	4	107.143
YDR128W	4	227.3	3.98396	1	4	219.986															7	121.7	4.19114	0	4	102.422
YDR132C	4	233.3	4.35652	1	4	223.321															14	147.6	5.29828	0	4	99.6708
YBR298C	4	236.3	4.24852	0	2	241.321															4	94.3	4.01943	1	4	97.3485
YDR151C	4	236.7	5.98811	1	4	237.228															4	94.3	4.32241	1	4	96.862
YDR140W	4	242.3	4.09728	1	4	227.611															2	206.1	4.75662	0	4	94.6244
YDR160W	4	242.3	8.06834	1	4	240.641															12	227	4.74989	0	4	93.6507
YOL089C	4	242.3	4.67613	0	15	50.6557															12	233	17.9255	0	4	93.4416
YDR170C	4	247.3	5.83215	1	4	248.722															4	41.3	4.77204	0	4	93.0055
YDR180W	4	255.7	4.57521	1	4	254.636															14	151.6	8.16879	0	4	92.0209
YIR008C	4	255.7	4.15144	0	9	168.467															7	136.9	4.94988	0	4	89.8833
YDR173C	4	257.3	4.67946	1	4	251.639															12	234	5.1188	0	4	89.8833
YDR182W-A	4	258.3	13.261	1	4	257.065															4	90.3	7.70143	1	4	88.4159
YHR009C	4	261.3	4.03123	0	8	37.6962															14	168	5.03854	0	4	87.3899
YHR083W	4	261.3	4.26468	0	8	81.7509															4	79.3	5.35859	1	4	85.8507
YLR008C	4	262.3	5.00851	0	12	59.7554															4	41.3	6.56239	0	4	85.7607
YOR191W	4	266.3	3.97073	0	15	228.526															4	91.3	4.94658	1	4	85.2334
YNL103W	4	267.3	4.1431	0	14	158.264															14	160.6	4.02181	0	4	84.4641
YDR197W	4	269.3	4.21525	1	4	263.881															16	257.3	4.04777	0	4	83.0084
YAR031W	4	270.3	4.40097	0	1	84.0538															12	242	6.41436	0	4	82.1577
YPR079W	4	281.3	4.35844	0	16	202.684															2	177.5	5.4004	0	4	76.6619
YDR223W	4	283.3	6.98289	1	4	282.711															14	159.6	4.71205	0	4	76.1267
YDR217C	4	284.3	4.85829	1	4	280.038															4	60.3	4.34552	1	4	74.831
YOR274W	4	284.3	3.98296	0	15	276.451															4	65.3	7.58511	1	4	74.4703
YDR216W	4	285.3	4.00659	1	4	277.42															2	190.1	4.54248	0	4	72.8112
YOR101W	4	290.3	4.10291	0	15	170.056															7	111.9	4.13225	0	4	72.1033
YDR235W	4	291.3	4.04774	1	4	289.348															4	147.3	3.98625	0	4	70.4669
YDR244W	4	292.3	4.00753	1	4	294.637															15	49.2	4.27916	0	4	70.4669
YDR275W	4	302.3	5.81611	1	4	313.784															7	153.9	4.09697	0	4	69.5057
YNR005C	4	304.3	4.13446	0	14	235.846															2	148.1	5.21185	0	4	66.1003
YDR263C	4	308.3	15.2154	1	4	308.595															4	66.3	5.11481	1	4	62.7625
YDR264C	4	308.3	19.4048	1	4	309.461															13	15.6	4.11457	0	4	55.259
YDR262W	4	309.3	23.4313	1	4	307.85															14	168	5.43293	0	4	55.259
YDR261C	4	313.3	5.0913	1	4	303.528															4	42.3	5.77248	1	4	54.7757
YDR272W	4	316.3	5.0169	1	4	312.778															14	168	18.9458	0	4	53.2763
YDR268W	4	319.3	5.05938	1	4	311.224															14	121.9	4.8617	0	4	51.971
YDR313C	4	321.3	5.2434	1	4	337.904															4	49.3	25.8436	1	4	49.4601
YMR304C-A	4	324.3	4.26176	0	13	298.919															4	46.7	7.01428	1	4	49.1911
YDR288W	4	325.3	13.2618	1	4	321.503															12	100	4.03105	0	4	48.2328
YDR286C	4	327.3	4.16041	1	4	321.002															12	234	16.5277	0	4	45.7388
YDR292C	4	328.3	5.58542	1	4	323.921															4	80.3	4.38897	0	4	44.0359
YDR294C	4	328.3	11.301	1	4	326.154															12	229	6.07846	0	4	43.2374
YDR315C	4	328.3	5.42934	1	4	338.995															7	128.9	4.09235	0	4	42.1131
YDR304C	4	334.3	4.9282	1	4	332.448															4	90.3	4.11369	0	4	41.8908
YDR317W	4	344.3	12.6324	1	4	341.672															15	49.2	3.97339	0	4	41.3506
YDR329C	4	351.3	6.54579	1	4	349.583															5	119.6	4.24783	0	4	41.3506
YDR339C	4	357.3	15.4415	1	4	356.683															13	292.6	4.13936	0	4	33.0729
YDR333C	4	360.3	3.9888	1	4	352.018															14	177.6	4.48174	0	4	32.9963
YDR344C	4	361.3	4.29347	1	4	360.371															5	125.6	4.18202	0	4	32.3939
YBL094C	4	363.3	4.45996	0	2	13.2017															14	172.6	9.00965	0	4	32.3939
YDR370C	4	363.3	4.42408	1	4	377.92															14	174.6	5.18105	0	4	32.0224
YDR364C	4	367.3	6.1975	1	4	373.298															14	168	10.3167	0	4	30.5099
YDR357C	4	368.3	7.2024	1	4	368.756															4	30.3	6.4376	1	4	27.3384
YFL054C	4	371.3	4.28252	0	6	10.9047															12	237	5.09431	0	4	26.1035
YDR362C	4	372.3	4.48506	1	4	371.587															4	21.3	4.62643	1	4	24.906
YDR365C	4	372.3	14.5091	1	4	373.972															7	110.9	5.21962	0	4	24.2895
YDR366C	4	372.3	6.85133	1	4	375.973															14	177.6	6.72032	0	4	20.5853
YDR367W	4	372.3	5.90731	1	4	375.977															14	154.6	3.98531	0	4	19.1941
YAL007C	4	373.3	4.14517	0	1	62.2421															11	122.6	4.16208	0	4	19.1941
YDR373W	4	374.3	9.92336	1	4	379.052															5	156.6	4.45562	0	4	16.1402
YOL034W	4	374.3	4.34502	0	15	85.7634															14	188.8	4.07985	0	4	14.1986
YCR106W	4	376.3	4.55354	0	3	149.243															4	9.3	9.0377	1	4	13.0582
YCL033C	4	377.3	5.41562	0	3	30.3609															4	13.3	5.70868	1	4	11.3673
YCR107W	4	377.3	4.50246	0	3	150.65															12	225.5	4.05464	0	4	9.96987
YDR335W	4	377.3	4.23377	0	4	353.791															12	157.9	4.58792	0	4	5.71247
YKL073W	4	377.3	4.0496	0	11	112.507															12	233	7.7319	0	4	4.98021
YCR101C	4	378.3	4.05606	0	3	145.438															10	209.4	7.67111	0	4	2.98121
YPL085W	4	381.3	4.15119	0	16	112.278															10	213.6	12.688	0	4	1.81213
YNL021W	4	382.3	4.04932	0	14	219.478															10	211.4	7.93921	0	4	1.12296
YHR073W	4	385.3	5.09083	0	8	72.7631															10	200.4	5.18916	0	4	0.515328
YHR180W	4	385.3	4.03147	0	8	139.55															14	166.6	4.11791	0	4	140.787
YJL196C	4	387.3	4.41092	0	10	20.6384															5	134.6	4.73545	0	4	141.993
YDR395W	4	390.3	4.13715	1	4	391.631															4	139.3	29.4074	1	4	142.996
YDR405W	4	390.5	4.5245	1	4	396.06															4	141.7	4.06947	1	4	143.675
YKL121W	4	390.5	4.03965	0	11	81.2106															4	141.7	5.49306	1	4	144.28
YOR243C	4	391.3	4.65402	0	15	261.46															15	212.1	4.2717	0	4	144.446
YCL054W	4	392.3	4.07864	0	3	15.0782															12	233	6.54767	0	4	144.446
YDR021W	4	393.3	3.97741	0	4	150.93															12	218	4.95706	0	4	146.693
YIL096C	4	393.3	4.46379	0	9	82.3732															14	266.6	4.05274	0	4	150.016
YBR141C	4	394.3	5.21569	0	2	158.451															4	92.3	4.33468	0	4	150.016
YDR449C	4	394.3	4.50595	0	4	421.259															13	15.6	5.15775	0	4	150.483
YDR083W	4	395.3	4.15011	0	4	189.741															14	171.6	5.94851	0	4	150.818
YHR066W	4	395.3	4.64551	0	8	68.8003															4	393.3	3.97741	0	4	150.93
YJL146W	4	395.3	4.1865	0	10	43.0264															4	155.3	5.23443	1	4	154.194
YOL080C	4	395.3	5.0081	0	15	59.8465															7	387.9	4.93718	0	4	157.556
YOR137C	4	396.3	3.98569	0	15	192.587															4	148.3	11.7504	1	4	157.556
YBR271W	4	397.3	4.00657	0	2	223.471															4	153.3	8.34312	1	4	158.786
YDR402C	4	398.3	7.20895	1	4	394.84															4	159.3	29.5963	1	4	162.698
YER039C-A	4	398.3	4.88298	0	5	80.3328															4	159.3	23.727	1	4	162.924
YIL021C-A	4	403.3	3.99772	0	9	141.075															4	157.3	15.5151	1	4	164.556
YDR423C	4	407.9	36.324	1	4	408.937															4	158.3	24.3057	1	4	165.762
YDR424C	4	407.9	4.89478	1	4	409.043															14	168	5.61248	0	4	167.375
YDR440W	4	417.3	7.89668	1	4	416.157															13	9.6	4.36545	0	4	167.807
YDR468C	4	421.3	4.24885	1	4	433.588															14	166.6	8.02552	0	4	167.807
YDR469W	4	422.3	5.81568	1	4	433.685															12	324	4.29501	0	4	168.476
YDR443C	4	423.3	4.08315	1	4	418.472															5	119.6	6.64767	0	4	169.486
YDR472W	4	425.3	5.61175	1	4	435.017															12	234	6.73105	0	4	169.486
YDR444W	4	425.4	5.5873	1	4	418.581															12	235	4.21771	0	4	171.097
YDR452W	4	425.4	6.91894	1	4	422.496															5	38.6	8.16845	0	4	174.698
YDR463W	4	425.4	5.27961	1	4	429.914															14	164.6	4.13264	0	4	175.438
YLR274W	4	425.4	4.21593	0	12	248.927															4	178.3	4.21367	1	4	180.553
YEL032W	4	429.3	8.07739	0	5	30.4209															14	147.6	4.50477	0	4	180.851
YDR451C	4	430.3	4.30751	1	4	422.279															5	122.6	5.37593	0	4	182.378
YDR446W	4	432.3	4.83244	1	4	419.65															14	190.6	5.44047	0	4	185.513
YDR491C	4	439.3	4.21388	1	4	444.808															13	286.6	4.3927	0	4	187.235
YDR501W	4	447.3	5.27883	1	4	449.881															7	152.9	5.07387	0	4	187.235
YDR520C	4	451.3	5.92513	1	4	459.83															14	172.6	7.19261	0	4	187.235
YDR530C	4	463.3	7.96377	1	4	464.289															4	395.3	4.15011	0	4	189.741
YDR531W	4	463.3	12.0718	1	4	464.433															4	183.3	4.70808	1	4	191.008
YNL339C	4	464.3	3.96217	0	14	2.1885															5	72.6	4.01501	0	4	191.678
YOR396W	4	464.3	4.44667	0	15	358.197															4	183.3	6.41065	1	4	192.861
YDR539W	4	464.6	15.5909	1	4	468.73															14	168.6	6.95122	0	4	195.711
YDR545W	4	464.6	4.43819	1	4	473.139															14	158.6	4.05262	0	4	199.611
YEL075W-A	4	464.6	4.7992	0	5	1.68499															12	204	5.12441	0	4	199.611
YEL077C	4	464.6	4.87674	0	5	1.41446															4	206.3	13.4155	1	4	199.611
YER190W	4	464.6	4.33375	0	5	199.985															14	162.6	8.63825	0	4	206.145
YFL066C	4	464.6	5.11798	0	6	1.21715															4	212.3	6.42761	1	4	206.794
YGR296W	4	464.6	4.2392	0	7	401.391															11	115.6	5.01603	0	4	208.117
YHR218W-A	4	464.6	4.58502	0	8	168.024															14	203.6	4.73876	0	4	209.48
YHR219W	4	464.6	3.98602	0	8	168.097															14	187.6	4.53605	0	4	210.751
YIL177C	4	464.6	4.31396	0	9	2.05285															4	214.3	5.93349	1	4	210.751
YJL225C	4	464.6	4.90361	0	10	1.40605															14	168	4.44639	0	4	211.498
YLL066C	4	464.6	4.73032	0	12	3.35931															14	172.6	8.02441	0	4	211.934
YLL067C	4	464.6	4.43054	0	12	1.36647															1	21.7	5.77427	0	4	213.232
YLR463C	4	464.6	4.51101	0	12	384.057															4	208.3	21.4981	1	4	213.232
YLR465C	4	464.6	4.56101	0	12	384.25															5	121.6	4.08039	0	4	214.239
YLR466C-B	4	464.6	7.53874	0	12	385.819															12	236	5.41814	0	4	214.239
YLR466W	4	464.6	4.70436	0	12	384.154															5	55.6	5.15771	0	4	215.036
YML133C	4	464.6	4.54694	0	13	1.26074															5	44.6	4.70496	0	4	216.86
YPR204W	4	464.6	4.74278	0	16	273.983															14	168	5.03874	0	4	216.86
YEL057C	5	10.6	7.54796	1	5	15.9851															1	19.7	4.236	0	4	217.123
YEL068C	5	10.6	9.84536	1	5	9.07234															4	214.3	16.644	1	4	217.123
YEL067C	5	18.6	4.9875	1	5	9.35163															4	213.3	10.5755	1	4	218.028
YHR053C	5	23.6	4.21636	0	8	63.8237															14	168	7.53201	0	4	218.416
YHR055C	5	23.6	4.36886	0	8	64.4249															4	227.3	3.98396	1	4	219.986
YEL018W	5	24.6	4.07618	1	5	42.5443															5	148.5	4.62307	0	4	219.986
YEL041W	5	27.6	11.1269	1	5	26.5688															8	40.3	4.67061	0	4	219.986
YEL045C	5	29.4	4.24158	1	5	24.2299															15	46.1	4.35238	0	4	223.321
YLR420W	5	29.4	8.00871	0	12	346.941															4	233.3	4.35652	1	4	223.321
YKL216W	5	33.6	18.7695	0	11	9.62085															4	225.3	5.60137	1	4	225.568
YAL054C	5	35.6	6.41846	0	1	20.2514															4	242.3	4.09728	1	4	227.611
YKL163W	5	35.6	7.98754	0	11	54.884															14	168	11.3592	0	4	229.427
YOL143C	5	35.6	17.4953	0	15	18.1558															6	47.4	4.00421	0	4	230.629
YOL141W	5	37.6	5.05605	0	15	18.6021															12	259	5.72963	0	4	230.629
YDR055W	5	38.6	8.16845	0	4	174.698															5	100.6	4.07819	0	4	231.32
YGL039W	5	40.6	4.1467	0	7	156.888															11	133.6	5.78429	0	4	234.1
YGR158C	5	41.6	4.62227	0	7	298.21															14	162.6	4.15769	0	4	234.274
YPL265W	5	41.6	5.00816	0	16	11.8805															4	236.7	5.98811	1	4	237.228
YEL001C	5	42.6	6.61075	1	5	52.8847															4	242.3	8.06834	1	4	240.641
YIL114C	5	42.6	3.96319	0	9	67.472															5	55.6	4.17671	0	4	241.534
YOL126C	5	42.6	7.11281	0	15	27.366															14	158.6	7.13062	0	4	243.138
YEL020C	5	43.6	6.19037	1	5	42.1328															13	284.6	4.35172	0	4	244.69
YGR108W	5	43.6	4.44437	0	7	260.35															4	247.3	5.83215	1	4	248.722
YMR185W	5	43.6	5.05169	0	13	213.894															13	110.6	5.92363	0	4	249.023
YBR131W	5	44.6	3.98863	0	2	149.172															2	60.1	12.0514	0	4	249.023
YDR123C	5	44.6	4.70496	0	4	216.86															11	117.6	4.35598	0	4	250.614
YHR210C	5	44.6	4.28473	0	8	156.561															4	257.3	4.67946	1	4	251.639
YMR211W	5	44.6	4.4938	0	13	234.29															14	168.6	6.78736	0	4	252.421
YNL255C	5	44.6	6.28591	0	14	62.0932															4	255.7	4.57521	1	4	254.636
YDR240C	5	45.6	4.00761	0	4	292.959															4	258.3	13.261	1	4	257.065
YEL006W	5	45.6	8.76256	1	5	50.5614															14	178.6	5.18144	0	4	257.53
YEL009C-A	5	45.6	6.58402	1	5	47.9179															12	242	5.0171	0	4	259.023
YBL029W	5	46.6	6.6988	0	2	49.8651															14	275.5	4.22334	0	4	261.916
YGL013C	5	46.6	4.25945	0	7	174.776															14	169.6	10.4253	0	4	262.868
YNL022C	5	46.6	4.36195	0	14	219.356															7	22.9	5.44151	0	4	263.07
YLR131C	5	47.6	4.10937	0	12	146.438															4	269.3	4.21525	1	4	263.881
YML008C	5	48.6	4.14481	0	13	85.9806															5	135.6	4.70884	0	4	263.881
YOL022C	5	49.3	5.53109	0	15	92.8888															14	161.6	5.2274	0	4	263.881
YOR303W	5	49.3	4.00911	0	15	291.355															3	27.9	4.4419	0	4	265.874
YDR465C	5	51.6	4.11324	0	4	432.312															14	172.6	6.208	0	4	267.223
YPR196W	5	51.6	5.11402	0	16	270.146															7	106.9	4.43695	0	4	269.128
YJR046W	5	52.6	4.72074	0	10	156.615															5	176.6	4.06426	0	4	270.124
YNR028W	5	52.6	4.66368	0	14	250.206															1	25.7	5.17285	0	4	275.001
YJR149W	5	53.6	4.409	0	10	212.122															12	233	8.20906	0	4	275.782
YKR056W	5	53.6	6.15998	0	11	208.61															16	100.3	4.24815	0	4	277.255
YLR172C	5	54.6	4.20487	0	12	180.787															4	285.3	4.00659	1	4	277.42
YDR121W	5	55.6	5.15771	0	4	215.036															5	121.6	4.28682	0	4	277.42
YDR161W	5	55.6	4.17671	0	4	241.534															4	284.3	4.85829	1	4	280.038
YEL044W	5	55.6	5.63342	0	5	24.4022															5	118.6	6.80097	0	4	281.232
YDR274C	5	56.6	4.46725	0	4	313.694															4	283.3	6.98289	1	4	282.711
YIL151C	5	56.6	5.21602	0	9	27.2844															14	173.6	9.9517	0	4	284.408
YJR097W	5	57.6	4.14473	0	10	183.7															3	26.9	4.18524	0	4	287.471
YKL166C	5	57.6	5.3923	0	11	51.574															12	240	4.52363	0	4	287.471
YLR214W	5	57.6	4.61536	0	12	204.732															5	118.6	4.64999	0	4	287.471
YOR142W	5	57.6	4.80872	0	15	195.68															3	56.9	4.29976	0	4	288.372
YDR361C	5	58.6	4.44335	0	4	370.832															4	291.3	4.04774	1	4	289.348
YKL144C	5	58.6	4.52688	0	11	67.059															14	167.6	7.25193	0	4	290.312
YPR026W	5	58.6	3.97401	0	16	178.451															14	127.6	5.7853	0	4	292.422
YGL121C	5	59.6	4.85072	0	7	104.046															5	45.6	4.00761	0	4	292.959
YJL079C	5	59.6	4.60818	0	10	87.206															1	17.7	15.0406	0	4	294.551
YMR017W	5	59.6	4.7269	0	13	104.508															4	292.3	4.00753	1	4	294.637
YOR213C	5	59.6	4.05984	0	15	245.955															14	173.6	4.02273	0	4	295.331
YIL155C	5	60.6	4.3269	0	9	24.1439															14	172.6	9.66989	0	4	296.327
YKL078W	5	60.6	4.15755	0	11	109.622															7	133.9	4.05663	0	4	297.503
YNL012W	5	60.6	4.44872	0	14	225.585															5	64.6	4.89411	0	4	300.57
YIL019W	5	61.6	4.0691	0	9	141.808															2	178.1	4.14361	0	4	301.127
YMR081C	5	61.6	4.56587	0	13	146.558															14	168.6	5.2924	0	4	301.127
YER019W	5	62.6	4.49269	1	5	67.4928															5	130.7	14.0489	0	4	302.464
YER054C	5	62.6	4.38936	0	5	92.3147															10	192.4	4.52366	0	4	302.913
YHR085W	5	62.6	4.42065	0	8	82.9885															4	313.3	5.0913	1	4	303.528
YML042W	5	62.6	5.43912	0	13	65.5356															12	303	5.33779	0	4	303.528
YJR008W	5	63.6	4.23878	0	10	135.756															16	76.6	4.21038	0	4	307.85
YKL093W	5	63.6	4.93825	0	11	100.472															4	309.3	23.4313	1	4	307.85
YNL160W	5	63.6	4.1644	0	14	124.562															4	308.3	15.2154	1	4	308.595
YDR256C	5	64.6	4.89411	0	4	300.57															4	308.3	19.4048	1	4	309.461
YEL052W	5	64.6	5.50909	0	5	19.7846															5	134.6	4.5485	0	4	311.068
YJR127C	5	66.6	4.34852	0	10	198.923															4	319.3	5.05938	1	4	311.224
YFL013W-A	5	67.6	4.5221	0	6	51.7124															12	217	4.05816	0	4	311.743
YER029C	5	69.8	4.37782	1	5	74.6236															4	316.3	5.0169	1	4	312.778
YGL204C	5	69.8	4.71029	0	7	41.4792															2	170.1	4.3371	0	4	313.694
YGR152C	5	69.8	4.39728	0	7	294.324															5	56.6	4.46725	0	4	313.694
YDR087C	5	72.6	4.01501	0	4	191.678															4	302.3	5.81611	1	4	313.784
YER028C	5	75.6	6.25193	1	5	74.168															13	276.6	4.8335	0	4	315.988
YDR312W	5	76.6	4.12472	0	4	337.126															11	53.6	4.40979	0	4	316.415
YER024W	5	82.6	4.29017	1	5	70.777															13	9.6	12.7145	0	4	316.902
YER036C	5	88.6	5.79343	1	5	78.8334															14	158.6	3.9847	0	4	317.655
YER039C-A	5	90	5.73209	1	5	80.3328															2	99.1	4.10586	0	4	317.655
YER041W	5	90.6	9.69646	1	5	81.3763															7	150.9	4.25102	0	4	319.293
YCL030C	5	92.6	4.55381	0	3	32.7858															14	168	8.11425	0	4	319.293
YER065C	5	93.6	6.58355	1	5	100.444															14	173.6	5.36209	0	4	319.716
YBR248C	5	95.6	5.22284	0	2	214.983															4	327.3	4.16041	1	4	321.002
YEL065W	5	95.6	4.40432	0	5	9.65996															14	262.6	4.63733	0	4	321.002
YER044C-A	5	95.6	4.0142	1	5	83.8843															16	76.6	4.61626	0	4	321.503
YJR142W	5	95.6	4.45192	0	10	209.124															4	325.3	13.2618	1	4	321.503
YNR056C	5	95.6	4.97246	0	14	271.309															4	328.3	5.58542	1	4	323.921
YNR057C	5	95.6	5.61152	0	14	271.592															4	328.3	11.301	1	4	326.154
YHR205W	5	99.6	5.97234	0	8	152.839															9	29.9	4.14469	0	4	327.077
YDR144C	5	100.6	4.07819	0	4	231.32															12	231	10.8626	0	4	327.491
YER053C	5	100.6	4.86525	1	5	90.8933															14	201.6	4.80789	0	4	332.448
YDR398W	5	101.6	4.54927	0	4	392.914															4	334.3	4.9282	1	4	332.448
YML056C	5	102.6	4.86602	0	13	55.5329															7	309.9	5.37591	0	4	333.262
YAL027W	5	103.6	4.85648	0	1	42.6294															2	103.4	4.16917	0	4	334.282
YER070W	5	103.6	8.39823	1	5	104.659															7	234.5	4.18424	0	4	334.827
YPL147W	5	103.6	5.49031	0	16	79.2517															5	76.6	4.12472	0	4	337.126
YNL132W	5	104.6	4.28385	0	14	138.854															4	321.3	5.2434	1	4	337.904
YBR125C	5	106.6	4.1048	0	2	146.532															4	328.3	5.42934	1	4	338.995
YPL047W	5	107.6	4.71697	0	16	135.093															9	28.9	4.16453	0	4	339.051
YKL094W	5	108.8	4.94428	0	11	99.924															14	168	7.62429	0	4	339.051
YEL046C	5	110.6	4.53369	0	5	24.0642															4	344.3	12.6324	1	4	341.672
YER080W	5	110.6	5.4683	1	5	112.009															8	21.3	4.79294	0	4	342.806
YKL004W	5	110.6	4.36126	0	11	165.373															13	49.6	4.53472	0	4	343.514
YMR290C	5	111.6	4.12709	0	13	289.535															14	161.6	4.80869	0	4	344.82
YGL140C	5	112.6	3.97846	0	7	90.6625															7	338.9	4.00731	0	4	344.289
YKL188C	5	112.6	4.38549	0	11	33.7191															12	236	4.09558	0	4	344.289
YOL021C	5	112.6	4.11823	0	15	94.1847															14	166.6	7.67082	0	4	344.289
YGL044C	5	113.6	4.05967	0	7	154.326															14	168	5.83758	0	4	346.211
YIL105C	5	113.6	4.57041	0	9	76.3103															12	340	4.15712	0	4	348.869
YJL118W	5	113.6	5.02102	0	10	57.5118															4	351.3	6.54579	1	4	349.583
YKL175W	5	113.6	4.1616	0	11	45.1367															7	123.9	5.07448	0	4	349.669
YML125C	5	113.6	4.68067	0	13	7.35085															4	360.3	3.9888	1	4	352.018
YCR028C	5	114.6	3.98453	0	3	82.7766															4	377.3	4.23377	0	4	353.791
YHL011C	5	114.6	4.20537	0	8	24.4953															14	168	5.63576	0	4	355.384
YJR153W	5	114.6	6.93929	0	10	216.815															14	165.6	4.21281	0	4	356.357
YKL191W	5	114.6	4.45542	0	11	30.7814															4	357.3	15.4415	1	4	356.683
YOL108C	5	114.6	4.82984	0	15	36.9289															4	361.3	4.29347	1	4	360.371
YBR076W	5	115.6	4.77039	0	2	117.099															14	165.6	9.36781	0	4	362.452
YER110C	5	115.6	5.32797	1	5	133.734															3	34.9	5.03856	0	4	363.27
YHR042W	5	115.6	4.57475	0	8	57.1477															7	131.9	4.33443	0	4	366.354
YML031W	5	115.6	6.22274	0	13	72.7969															14	154.6	4.00138	0	4	368.756
YNL009W	5	115.6	7.60582	0	14	227.491															4	368.3	7.2024	1	4	368.756
YGR225W	5	116.6	4.26992	0	7	349.735															7	139.9	5.00298	0	4	368.908
YHR149C	5	116.6	5.88308	0	8	119.041															5	58.6	4.44335	0	4	370.832
YJL048C	5	116.6	4.0899	0	10	104.608															4	372.3	4.48506	1	4	371.587
YKL142W	5	116.6	4.09659	0	11	67.8304															14	158.6	3.98069	0	4	373.298
YNL123W	5	116.6	6.79481	0	14	146.007															4	367.3	6.1975	1	4	373.298
YOR262W	5	116.6	7.4938	0	15	269.731															4	372.3	14.5091	1	4	373.972
YOR356W	5	116.6	4.14612	0	15	332.394															4	372.3	6.85133	1	4	375.973
YBR220C	5	117.6	4.0742	0	2	199.418															4	372.3	5.90731	1	4	375.977
YCR059C	5	117.6	4.17913	0	3	107.645															4	363.3	4.42408	1	4	377.92
YER059W	5	117.6	5.03487	0	5	95.4401															4	374.3	9.92336	1	4	379.052
YGR079W	5	117.6	4.97053	0	7	237.033															14	168	12.8442	0	4	380.223
YGR130C	5	117.6	4.52148	0	7	278.951															12	235	5.53062	0	4	385.03
YIL030C	5	117.6	6.57833	0	9	135.002															7	109.9	6.10346	0	4	387.446
YMR030W	5	117.6	4.34924	0	13	112.434															7	307.9	5.00278	0	4	390.001
YMR042W	5	117.6	7.22897	0	13	119.852															14	168	4.28851	0	4	390.573
YMR301C	5	117.6	4.72153	0	13	295.681															4	390.3	4.13715	1	4	391.631
YBR175W	5	118.6	4.39976	0	2	174.707															5	101.6	4.54927	0	4	392.914
YDR221W	5	118.6	6.80097	0	4	281.232															4	398.3	7.20895	1	4	394.84
YDR232W	5	118.6	4.64999	0	4	287.471															7	111.9	4.14889	0	4	395.912
YMR108W	5	118.6	3.98151	0	13	164.596															4	390.5	4.5245	1	4	396.06
YNL100W	5	118.6	5.24903	0	14	161.927															6	19.3	4.43122	0	4	397.962
YOR289W	5	118.6	4.22455	0	15	281.619															10	190.4	4.13714	0	4	399.527
YAL020C	5	119.6	4.16572	0	1	51.5816															14	175.6	8.44228	0	4	399.696
YBL020W	5	119.6	4.59905	0	2	54.7279															7	108.9	4.68898	0	4	400.835
YBR263W	5	119.6	4.04866	0	2	220.904															14	171.6	7.24111	0	4	402.486
YDL182W	5	119.6	4.24783	0	4	41.3506															14	109.6	4.11078	0	4	408.47
YDR044W	5	119.6	6.64767	0	4	169.486															4	407.9	36.324	1	4	408.937
YGR033C	5	119.6	4.37146	0	7	205.365															4	407.9	4.89478	1	4	409.043
YIL043C	5	119.6	4.45383	0	9	123.688															14	168	7.69215	0	4	409.182
YKL081W	5	119.6	4.49994	0	11	107.357															16	267.4	4.27189	0	4	410.811
YKL146W	5	119.6	4.56036	0	11	65.2771															14	168	5.17332	0	4	411.796
YLR270W	5	119.6	4.14812	0	12	245.192															14	157.6	5.13209	0	4	411.893
YMR196W	5	119.6	5.51154	0	13	222.755															3	23.9	4.657	0	4	412.657
YNL265C	5	119.6	4.06308	0	14	53.7246															7	333.9	4.4947	0	4	413.771
YOR215C	5	119.6	6.72473	0	15	246.616															7	135.9	4.15501	0	4	415.281
YBR238C	5	120.6	5.31795	0	2	209.224															4	417.3	7.89668	1	4	416.157
YBR285W	5	120.6	4.96309	0	2	232.161															15	312.1	4.3407	0	4	416.956
YEL040W	5	120.6	4.30534	0	5	27.3073															4	423.3	4.08315	1	4	418.472
YER100W	5	120.6	5.08058	1	5	125.844															4	425.4	5.5873	1	4	418.581
YGR088W	5	120.6	6.73769	0	7	242.185															4	432.3	4.83244	1	4	419.65
YHR097C	5	120.6	5.57344	0	8	89.4793															4	394.3	4.50595	0	4	421.259
YJL198W	5	120.6	6.24764	0	10	18.2628															14	165.6	4.16985	0	4	422.279
YKR009C	5	120.6	4.52113	0	11	173.521															4	430.3	4.30751	1	4	422.279
YKR066C	5	120.6	4.15243	0	11	215.354															4	425.4	6.91894	1	4	422.496
YLR437C	5	120.6	4.0883	0	12	364.32															7	109.9	4.06064	0	4	423.929
YMR011W	5	120.6	7.40555	0	13	97.9071															14	168.6	17.1051	0	4	424.645
YOR244W	5	120.6	5.0336	0	15	261.556															10	134.4	4.67397	0	4	429.914
YOR317W	5	120.6	6.13899	0	15	300.079															4	425.4	5.27961	1	4	429.914
YBL057C	5	121.6	5.56003	0	2	34.048															5	125.6	5.87273	0	4	429.914
YDR119W-A	5	121.6	4.08039	0	4	214.239															5	51.6	4.11324	0	4	432.312
YDR216W	5	121.6	4.28682	0	4	277.42															4	421.3	4.24885	1	4	433.588
YIL094C	5	121.6	4.20927	0	9	84.3986															4	422.3	5.81568	1	4	433.685
YMR104C	5	121.6	4.01849	0	13	161.658															4	425.3	5.61175	1	4	435.017
YNL023C	5	121.6	4.65453	0	14	218.71															13	10.6	7.59786	0	4	440.251
YPR008W	5	121.6	4.19005	0	16	166.162															13	282.6	4.25935	0	4	441.028
YBL029C-A	5	122.6	5.08164	0	2	49.458															1	30.7	5.03554	0	4	442.95
YDR070C	5	122.6	5.37593	0	4	182.378															4	439.3	4.21388	1	4	444.808
YER098W	5	122.6	7.4627	1	5	124.413															2	103.4	4.34145	0	4	445.187
YIL107C	5	122.6	4.85239	0	9	74.5659															14	168	6.72701	0	4	445.187
YJL164C	5	122.6	5.27092	0	10	33.3541															14	168	8.2659	0	4	445.408
YNR050C	5	122.6	5.68506	0	14	264.692															13	283.6	6.22008	0	4	446.714
YOR313C	5	122.6	4.04961	0	15	297.945															14	169.6	6.29073	0	4	446.714
YPR058W	5	122.6	6.40146	0	16	195.386															2	213.1	4.25713	0	4	447.414
YAL008W	5	123.6	4.59809	0	1	61.5993															6	31.3	4.58071	0	4	448.528
YBR001C	5	123.6	8.02238	0	2	72.3687															4	447.3	5.27883	1	4	449.881
YGL248W	5	123.6	6.20631	0	7	13.1814															16	18.3	4.14108	0	4	450.847
YGR248W	5	123.6	4.95824	0	7	364.804															4	66.6	4.48697	0	4	450.847
YOR185C	5	123.6	3.98565	0	15	225.096															12	227	8.47062	0	4	450.847
YFL015C	5	124.6	6.50947	0	6	51.3114															12	235	5.661	0	4	455.675
YGR230W	5	124.6	5.15383	0	7	352.226															14	168	4.34509	0	4	456.734
YKL091C	5	124.6	4.26661	0	11	102.701															14	169.6	5.77385	0	4	457.68
YML128C	5	124.6	4.50936	0	13	5.64274															14	160.6	4.07031	0	4	457.917
YMR107W	5	124.6	7.17023	0	13	164.232															10	198.4	4.90863	0	4	457.917
YDL198C	5	125.6	4.18202	0	4	32.3939															15	47.1	6.14077	0	4	457.917
YDR463W	5	125.6	5.87273	0	4	429.914															4	451.3	5.92513	1	4	459.83
YER037W	5	125.6	9.24548	0	5	79.075															4	72.3	4.52988	0	4	463.911
YKL110C	5	125.6	6.02088	0	11	87.1957															12	238	8.72662	0	4	463.911
YER097W	5	126.6	13.5312	1	5	124.299															4	463.3	7.96377	1	4	464.289
YHR022C	5	126.6	4.59563	0	8	45.0771															4	463.3	12.0718	1	4	464.433
YHR139C	5	126.6	7.68933	0	8	113.791															15	49.2	11.187	0	4	465.651
YIL011W	5	126.6	9.8545	0	9	150.216															10	83.1	4.21307	0	4	466.5
YIL077C	5	126.6	4.23958	0	9	97.131															14	237.2	4.25629	0	4	466.5
YMR016C	5	126.6	6.86804	0	13	103.864															4	464.6	15.5909	1	4	468.73
YLL012W	5	127.6	5.7366	0	12	45.1446															5	190.9	6.1497	0	4	472.709
YOL058W	5	127.6	4.06017	0	15	72.3009															5	190.9	8.63194	0	4	472.892
YOR271C	5	127.6	4.07258	0	15	274.595															12	376.1	5.21338	0	4	474.696
YDL037C	5	128.6	7.68717	0	4	119.551															4	464.6	4.43819	1	4	473.139
YMR173W	5	128.6	8.89071	0	13	206.965															5	42.6	6.61075	1	5	52.8847
YPR091C	5	128.6	5.83493	0	16	208.38															5	45.6	8.76256	1	5	50.5614
YBR115C	5	129.6	4.94742	0	2	142.188															8	29.3	5.98294	0	5	49.7108
YPR157W	5	129.6	4.28999	0	16	243.952															2	172.1	4.55077	0	5	49.2287
YMR173W-A	5	130.6	9.308	0	13	207.036															13	42.6	6.23941	0	5	48.9658
YCL009C	5	130.7	4.32995	0	3	50.6568															5	45.6	6.58402	1	5	47.9179
YDR259C	5	130.7	14.0489	0	4	302.464															3	43.9	5.59288	0	5	43.0561
YFL051C	5	130.7	14.566	0	6	14.6281															5	24.6	4.07618	1	5	42.5443
YIR019C	5	130.7	11.8108	0	9	177.175															5	43.6	6.19037	1	5	42.1328
YIR039C	5	130.7	3.99128	0	9	194.468															4	66.6	4.18002	0	5	37.5554
YOR032C	5	130.7	4.95814	0	15	129.037															12	234	15.7415	0	5	37.5554
YPL026C	5	130.7	6.93471	0	16	145.602															8	41.3	4.63666	0	5	35.2767
YGR046W	5	132.6	5.70944	0	7	216.421															7	107.9	4.99409	0	5	35.2767
YJR148W	5	133.6	7.88007	0	10	211.699															4	429.3	8.07739	0	5	30.4209
YMR265C	5	133.6	4.60093	0	13	271.259															12	233	7.26951	0	5	29.9782
YBR177C	5	134.6	10.1301	0	2	175.83															5	142.6	4.2616	0	5	29.5836
YDR005C	5	134.6	4.73545	0	4	141.993															12	237	11.5438	0	5	27.9811
YDR267C	5	134.6	4.5485	0	4	311.068															5	120.6	4.30534	0	5	27.3073
YER115C	5	134.6	5.22748	1	5	138.217															5	27.6	11.1269	1	5	26.5688
YHR140W	5	134.6	6.19643	0	8	114.204															5	55.6	5.63342	0	5	24.4022
YLR408C	5	134.6	4.67166	0	12	336.302															5	29.4	4.24158	1	5	24.2299
YOR330C	5	134.6	4.12795	0	15	311.31															5	110.6	4.53369	0	5	24.0642
YPR127W	5	134.6	7.30187	0	16	229.143															12	237	10.1335	0	5	23.3656
YDL049C	5	135.6	6.32444	0	4	113.424															14	168.6	10.8437	0	5	21.2834
YDR197W	5	135.6	4.70884	0	4	263.881															5	64.6	5.50909	0	5	19.7846
YER109C	5	135.6	10.4111	1	5	132.158															14	163.6	5.01014	0	5	16.4919
YLR312C	5	135.6	7.77783	0	12	273.194															5	10.6	7.54796	1	5	15.9851
YNL195C	5	135.6	6.82232	0	14	100.717															5	95.6	4.40432	0	5	9.65996
YOL151W	5	135.6	12.7023	0	15	14.378															12	215	4.01522	0	5	9.31348
YOR352W	5	135.6	5.71808	0	15	329.095															5	18.6	4.9875	1	5	9.35163
YBR054W	5	136.6	4.0225	0	2	102.968															5	10.6	9.84536	1	5	9.07234
YFL014W	5	136.6	7.1227	0	6	51.4519															13	303	6.55317	0	5	8.11095
YFR018C	5	136.6	5.44155	0	6	88.3944															14	174.6	7.714	0	5	5.7045
YHR132W-A	5	136.6	4.04029	0	8	111.041															4	464.6	4.7992	0	5	1.68499
YKR098C	5	136.6	4.18101	0	11	241.242															12	376.1	5.26584	0	5	1.68499
YMR210W	5	136.6	5.06888	0	13	233.759															4	464.6	4.87674	0	5	1.41446
YOL054W	5	136.6	4.40705	0	15	75.4101															12	376.1	4.9904	0	5	0.201079
YOR147W	5	136.6	4.32719	0	15	200.15															13	14.6	4.18266	0	5	55.8895
YPR155C	5	136.6	5.34467	0	16	242.838															14	160.6	9.71645	0	5	56.9874
YCL061C	5	137.6	4.99419	0	3	10.5935															12	228	10.8635	0	5	61.3626
YER114C	5	137.6	8.29653	1	5	137.811															14	166.6	4.72529	0	5	62.6177
YER134C	5	137.6	4.66739	1	5	153.27															12	232	5.72772	0	5	63.9308
YKR042W	5	137.6	5.15435	0	11	197.241															14	174.6	6.25451	0	5	67.1403
YLR234W	5	137.6	4.18577	0	12	219.526															5	62.6	4.49269	1	5	67.4928
YJL132W	5	138.6	5.11639	0	10	48.6121															13	287.6	5.18272	0	5	68.9428
YNL221C	5	138.6	4.02806	0	14	86.4496															7	282.9	4.06454	0	5	70.777
YBR231C	5	139.6	6.54036	0	2	204.952															5	82.6	4.29017	1	5	70.777
YCL052C	5	139.6	6.62234	0	3	16.9716															5	75.6	6.25193	1	5	74.168
YNR070W	5	139.6	4.5946	0	14	283.168															5	69.8	4.37782	1	5	74.6236
YGL126W	5	140.6	5.58333	0	7	100.284															14	176.6	5.53441	0	5	77.4635
YLR015W	5	140.6	4.49843	0	12	63.0524															14	168	8.06947	0	5	77.6593
YMR207C	5	140.6	4.21751	0	13	232.418															14	173.6	4.19988	0	5	77.9369
YMR214W	5	141.6	7.06485	0	13	236.416															5	88.6	5.79343	1	5	78.8334
YEL036C	5	142.6	4.2616	0	5	29.5836															5	125.6	9.24548	0	5	79.075
YOR039W	5	142.6	4.11906	0	15	133.884															13	190.6	4.14108	0	5	80.3328
YPR037C	5	144.6	5.13501	0	16	187.636															10	184.4	4.79216	0	5	80.3328
YDR128W	5	148.5	4.62307	0	4	219.986															4	398.3	4.88298	0	5	80.3328
YER135C	5	148.5	13.1247	1	5	153.459															5	90	5.73209	1	5	80.3328
YOL160W	5	148.5	4.96713	0	15	4.67383															5	90.6	9.69646	1	5	81.3763
YER139C	5	148.6	4.24795	1	5	157.964															12	260	5.43034	0	5	82.2433
YER137C	5	153.6	6.08992	1	5	154.672															7	290.9	8.50583	0	5	83.0074
YER152C	5	154.6	7.78702	1	5	165.909															12	236	19.3215	0	5	83.3215
YDL226C	5	156.6	4.45562	0	4	16.1402															5	95.6	4.0142	1	5	83.8843
YER150W	5	156.6	5.95234	1	5	163.947															13	196.6	4.19127	0	5	83.8843
YML037C	5	160.6	4.53076	0	13	69.8175															14	159.6	6.45924	0	5	86.2934
YJL019W	5	167.6	4.0768	0	10	120.85															12	236	4.52221	0	5	90.8933
YFL055W	5	169	4.30867	0	6	8.12746															5	100.6	4.86525	1	5	90.8933
YKL115C	5	169	6.05163	0	11	84.6877															12	237	16.6873	0	5	91.386
YJL218W	5	169.6	5.76124	0	10	6.62223															5	62.6	4.38936	0	5	92.3147
YJL217W	5	170.6	6.31565	0	10	6.97014															14	168	8.78392	0	5	95.1404
YJL219W	5	173.6	4.24001	0	10	5.87963															5	117.6	5.03487	0	5	95.4401
YGR280C	5	175.6	4.36911	0	7	389.129															14	170.6	6.55943	0	5	96.8226
YDR209C	5	176.6	4.06426	0	4	270.124															13	29.6	5.50492	0	5	97.8921
YER163C	5	178.6	6.96198	1	5	176.318															5	93.6	6.58355	1	5	100.444
YER168C	5	179.6	4.99268	1	5	182.916															14	181.6	4.55787	0	5	102.248
YAL068W-A	5	188.6	9.81393	0	1	0.217101															13	29.6	4.30605	0	5	103.532
YAL069W	5	190.9	10.7298	0	1	0.125745															16	116.3	5.92927	0	5	103.532
YCR108C	5	190.9	8.80591	0	3	151.753															13	27.6	4.4837	0	5	103.419
YDR543C	5	190.9	6.1497	0	4	472.709															7	135.9	5.48261	0	5	104.659
YDR544C	5	190.9	8.63194	0	4	472.892															5	103.6	8.39823	1	5	104.659
YER180C	5	190.9	9.63209	1	5	192.652															13	9.6	8.81486	0	5	106.009
YER185W	5	190.9	4.1291	1	5	195.776															14	158.6	6.93773	0	5	108.947
YER187W	5	190.9	14.7607	1	5	198.147															14	171.6	9.85591	0	5	111.443
YER188C-A	5	190.9	5.98895	1	5	199.434															13	11.6	5.35492	0	5	111.549
YER188W	5	190.9	19.0925	1	5	198.781															16	74.3	4.36768	0	5	112.106
YLL065W	5	190.9	13.5039	0	12	4.17877															5	110.6	5.4683	1	5	112.009
YNL337W	5	190.9	8.52034	0	14	2.64505															13	21.6	4.52502	0	5	112.961
YDR406W-A	6	19.3	4.43122	0	4	397.962															16	265.3	4.04764	0	5	114.49
YFL057C	6	19.3	9.8882	1	6	7.05122															3	137	4.66988	0	5	116.504
YJL214W	6	19.3	28.7526	0	10	8.09603															14	168	6.61549	0	5	115.717
YOL165C	6	19.3	4.66253	0	15	0.636146															14	174.6	4.41008	0	5	117.328
YFL056C	6	20.3	13.0752	1	6	7.37203															8	79.3	5.16613	0	5	118.293
YFL053W	6	22.3	12.2353	1	6	11.2102															14	159.6	4.05392	0	5	119.766
YFL055W	6	28.3	6.3546	0	6	8.12746															7	283.9	4.34837	0	5	119.766
YFL054C	6	29.3	10.7632	1	6	10.9047															5	126.6	13.5312	1	5	124.299
YFL052W	6	30.3	10.1676	1	6	13.5197															5	122.6	7.4627	1	5	124.413
YLR074C	6	30.3	4.26607	0	12	101.713															10	204.4	4.15717	0	5	125.669
YDR498C	6	31.3	4.58071	0	4	448.528															5	120.6	5.08058	1	5	125.844
YHR213W-B	6	31.3	7.96677	0	8	162.282															12	104	4.06427	0	5	127.08
YFL025C	6	35.3	6.70249	1	6	41.8449															13	283.6	4.24628	0	5	130.193
YGL077C	6	35.3	6.04357	0	7	134.675															5	135.6	10.4111	1	5	132.158
YIL014C-A	6	39.3	5.25226	0	9	146.516															5	115.6	5.32797	1	5	133.734
YFL028C	6	41.3	4.5487	1	6	38.4745															10	201.4	4.06637	0	5	136.526
YFL021W	6	47.3	8.25801	1	6	46.0367															14	162.6	4.72842	0	5	136.526
YDR143C	6	47.4	4.00421	0	4	230.629															14	157.6	6.40822	0	5	137.811
YFL022C	6	53.3	7.53015	1	6	45.5777															5	137.6	8.29653	1	5	137.811
YMR244W	6	55.3	5.00087	0	13	257.42															5	134.6	5.22748	1	5	138.217
YFL010C	6	66.3	7.61823	1	6	55.5235															10	67.4	4.38722	0	5	140.315
YFR012W-A	6	70.3	4.32986	1	6	81.1832															14	159.6	3.96993	0	5	141.548
YFL002W-B	6	79.8	4.16519	1	6	66.2995															2	172.1	12.9516	0	5	143.202
YFL003C	6	81.3	9.97588	1	6	65.7972															9	77.9	4.29435	0	5	147.902
YFR012W	6	84.3	8.24621	1	6	80.5411															5	137.6	4.66739	1	5	153.27
YGR127W	6	87.3	4.42689	0	7	276.351															12	154	4.74859	0	5	153.459
YFR018C	6	91.3	5.07689	1	6	88.3944															5	148.5	13.1247	1	5	153.459
YFR020W	6	94.3	5.1492	1	6	92.4902															16	186.3	4.03783	0	5	154.672
YGR025W	6	95.3	5.19657	0	7	197.113															5	153.6	6.08992	1	5	154.672
YFR026C	6	99.3	5.15538	1	6	98.992															5	148.6	4.24795	1	5	157.964
YFR025C	6	108.3	5.99062	1	6	98.2672															12	245	4.85772	0	5	158.738
YMR237W	6	110.3	4.2026	0	13	252.839															14	157.6	5.89133	0	5	162.714
YFR054C	6	111.8	12.8282	1	6	124.548															5	156.6	5.95234	1	5	163.947
YFR055W	6	111.8	4.01517	1	6	126.839															7	106.9	4.73485	0	5	165.363
YOR109W	6	111.8	4.12024	0	15	173.359															2	171.1	5.62464	0	5	165.909
YCR105W	7	9.9	4.07789	0	3	148.337															5	154.6	7.78702	1	5	165.909
YGL241W	7	14.9	5.98121	1	7	16.8126															2	10.1	4.25425	0	5	169.682
YGL252C	7	15.9	8.0594	1	7	10.1522															14	181.6	5.31418	0	5	176.007
YLL066W-B	7	21.9	5.58628	0	12	1.97494															5	178.6	6.96198	1	5	176.318
YNL338W	7	21.9	4.72458	0	14	2.42158															14	180.6	6.3522	0	5	176.88
YDR195W	7	22.9	5.44151	0	4	263.07															14	178.6	5.47179	0	5	178.62
YHR217C	7	22.9	5.80286	0	8	167.157															11	71.6	4.666	0	5	182.916
YGL216W	7	24.9	6.96665	1	7	31.4376															5	179.6	4.99268	1	5	182.916
YGL221C	7	26.9	6.70788	1	7	30.476															2	103.1	4.68271	0	5	184.071
YIL087C	7	29.9	5.26147	0	9	90.0124															12	107	5.21252	0	5	184.458
YGL207W	7	30.9	6.3291	1	7	36.6571															14	168.6	10.3047	0	5	187.581
YGL208W	7	32.9	5.24709	1	7	36.0537															8	34.3	4.26235	0	5	187.678
YGL204C	7	41.9	12.2769	1	7	41.4792															16	235.9	4.43363	0	5	188.68
YIL051C	7	49.9	5.21668	0	9	116.192															13	163.6	5.5386	0	5	190.931
YGL170C	7	51.9	8.31982	1	7	68.6101															5	190.9	9.63209	1	5	192.652
YGL179C	7	54.8	9.47052	1	7	61.1091															14	165.6	6.04221	0	5	193.351
YGL180W	7	54.8	4.0994	1	7	59.2522															5	190.9	4.1291	1	5	195.776
YGL183C	7	54.8	4.7682	1	7	58.1934															5	190.9	14.7607	1	5	198.147
YGL186C	7	54.8	9.44148	1	7	56.5593															5	190.9	5.98895	1	5	199.434
YOL046C	7	54.9	4.44061	0	15	80.5439															5	190.9	19.0925	1	5	198.781
YGL194C-A	7	60.9	6.00491	1	7	51.8211															12	376.1	4.72532	0	5	201.623
YGL154C	7	64.9	5.06163	1	7	79.9562															4	464.6	4.33375	0	5	199.985
YGL162W	7	64.9	4.36959	1	7	73.3183															6	79.8	4.16519	1	6	66.2995
YGL159W	7	70.9	7.89424	1	7	75.0115															6	81.3	9.97588	1	6	65.7972
YGL136C	7	82.9	7.99528	1	7	93.9382															2	181.1	4.73227	0	6	63.232
YIL143C	7	91.9	5.35669	0	9	37.3301															13	9.6	5.77045	0	6	63.232
YNR041C	7	95.9	4.11429	0	14	259.621															14	168	7.48236	0	6	59.2353
YIL173W	7	100	4.42732	0	9	5.15574															14	155.6	4.02252	0	6	57.2923
YJL222W	7	100	4.23789	0	10	3.47369															6	66.3	7.61823	1	6	55.5235
YLR006C	7	100.9	3.96171	0	12	58.9657															5	67.6	4.5221	0	6	51.7124
YIR022W	7	105.9	5.07624	0	9	179.449															5	136.6	7.1227	0	6	51.4519
YDR208W	7	106.9	4.43695	0	4	269.128															5	124.6	6.50947	0	6	51.3114
YER151C	7	106.9	4.73485	0	5	165.363															1	74.7	8.63799	0	6	47.7785
YGL225W	7	106.9	4.32275	0	7	28.4743															6	47.3	8.25801	1	6	46.0367
YNL024C-A	7	106.9	5.97381	0	14	217.1															12	100	4.60308	0	6	45.5777
YBR235W	7	107.9	4.64452	0	2	206.098															2	201.1	4.74313	0	6	45.5777
YEL027W	7	107.9	4.99409	0	5	35.2767															6	53.3	7.53015	1	6	45.5777
YGR063C	7	107.9	6.49867	0	7	228.574															6	35.3	6.70249	1	6	41.8449
YIL006W	7	107.9	5.33821	0	9	154.87															3	68.9	6.59529	0	6	39.6108
YJR001W	7	107.9	4.45162	0	10	131.053															16	25	5.57141	0	6	39.2901
YDR410C	7	108.9	4.68898	0	4	400.835															6	41.3	4.5487	1	6	38.4745
YGR282C	7	108.9	4.24105	0	7	391.719															7	331.9	4.34123	0	6	28.1871
YNL127W	7	108.9	4.2231	0	14	142.048															13	297.6	4.63047	0	6	23.5585
YPR181C	7	108.9	4.53739	0	16	260.923															5	130.7	14.566	0	6	14.6281
YCL002C	7	109.9	5.23401	0	3	53.543															12	156	4.56407	0	6	13.5197
YDR387C	7	109.9	6.10346	0	4	387.446															15	287.1	5.28113	0	6	13.5197
YDR456W	7	109.9	4.06064	0	4	423.929															6	30.3	10.1676	1	6	13.5197
YOL105C	7	109.9	4.2065	0	15	38.2234															12	157.9	4.05809	0	6	11.2102
YPR113W	7	109.9	4.98632	0	16	218.186															15	296.1	4.14136	0	6	11.2102
YDL212W	7	110.9	5.21962	0	4	24.2895															6	22.3	12.2353	1	6	11.2102
YGR002C	7	110.9	4.75411	0	7	185.003															4	371.3	4.28252	0	6	10.9047
YOR085W	7	110.9	4.30424	0	15	159.074															15	289.6	4.9379	0	6	10.9047
YDL128W	7	111.9	4.13225	0	4	72.1033															12	157.9	4.98195	0	6	10.9047
YDR404C	7	111.9	4.14889	0	4	395.912															6	29.3	10.7632	1	6	10.9047
YGR199W	7	111.9	4.38711	0	7	332.086															5	169	4.30867	0	6	8.12746
YJR143C	7	111.9	4.89513	0	10	210.163															10	10.4	6.02124	0	6	8.12746
YLR220W	7	111.9	4.82125	0	12	207.696															12	156	6.06421	0	6	8.12746
YMR088C	7	111.9	4.61862	0	13	151.326															6	28.3	6.3546	0	6	8.12746
YMR155W	7	111.9	4.53531	0	13	193.308															15	293.1	6.36277	0	6	8.12746
YMR292W	7	111.9	5.10474	0	13	290.627															12	157.9	4.03973	0	6	7.37203
YOL030W	7	111.9	5.54551	0	15	88.496															6	20.3	13.0752	1	6	7.37203
YPL070W	7	111.9	5.89842	0	16	122.063															6	19.3	9.8882	1	6	7.05122
YAR002C-A	7	112.9	4.65202	0	1	69.6059															12	231	7.74201	0	6	6.17044
YBR243C	7	112.9	4.26059	0	2	212.076															10	213.6	6.31837	0	6	5.41837
YFR019W	7	112.9	4.61494	0	6	88.5291															10	213.6	5.5319	0	6	5.22915
YGL012W	7	112.9	5.42431	0	7	174.983															8	154.3	4.30691	0	6	1.56437
YGR203W	7	112.9	5.09285	0	7	334.954															12	376.1	4.38886	0	6	1.21715
YHR175W	7	112.9	4.62085	0	8	135.868															4	464.6	5.11798	0	6	1.21715
YKL162C-A	7	112.9	4.71413	0	11	55.5208															12	376.1	5.83956	0	6	-0.0132554
YMR215W	7	112.9	4.77815	0	13	236.906															14	158.6	4.1421	0	6	76.4192
YHR026W	7	113.9	8.25166	0	8	48.2192															4	62.3	4.30727	0	6	76.4192
YIL009C-A	7	113.9	5.26847	0	9	151.213															7	130.9	5.53309	0	6	77.0122
YOR067C	7	113.9	4.37297	0	15	149.62															14	169.6	12.1938	0	6	77.9491
YCR067C	7	114.9	4.93298	0	3	113.443															14	168	8.15459	0	6	78.6146
YGL096W	7	114.9	11.5668	1	7	120.4															14	164.6	4.68912	0	6	80.2381
YGL112C	7	114.9	7.58954	1	7	110.921															6	84.3	8.24621	1	6	80.5411
YLR381W	7	114.9	4.19269	0	12	316.718															6	70.3	4.32986	1	6	81.1832
YOL092W	7	114.9	4.21032	0	15	47.5956															12	229	4.55786	0	6	84.6301
YGL108C	7	115.9	8.47222	1	7	112.529															11	51.6	5.17661	0	6	86.7232
YHL017W	7	115.9	4.62722	0	8	21.0855															14	194.6	8.71955	0	6	86.7232
YHR151C	7	115.9	6.36581	0	8	120.301															6	91.3	5.07689	1	6	88.3944
YPR004C	7	116.9	4.13138	0	16	163.847															5	136.6	5.44155	0	6	88.3944
YBR212W	7	118.9	4.44166	0	2	194.372															12	225.5	5.91921	0	6	88.3944
YNL322C	7	118.9	4.19237	0	14	12.6646															7	112.9	4.61494	0	6	88.5291
YKR088C	7	119.9	4.78111	0	11	229.907															6	94.3	5.1492	1	6	92.4902
YDL072C	7	121.7	4.19114	0	4	102.422															6	108.3	5.99062	1	6	98.2672
YGL090W	7	121.7	4.99805	1	7	127.056															6	99.3	5.15538	1	6	98.992
YJR044C	7	121.7	5.05115	0	10	155.758															4	57.3	4.49926	0	6	102.385
YKR065C	7	121.7	4.14009	0	11	214.858															12	238	11.7028	0	6	107.895
YPL184C	7	121.7	4.38089	0	16	57.3356															12	241	4.02761	0	6	110.112
YBR287W	7	121.9	4.95792	0	2	232.953															4	95.3	4.22247	0	6	110.112
YBL075C	7	123.9	5.45208	0	2	25.933															6	111.8	12.8282	1	6	124.548
YDR330W	7	123.9	5.07448	0	4	349.669															6	111.8	4.01517	1	6	126.839
YGL117W	7	124.9	4.87406	1	7	106.769															7	159.9	4.10458	0	7	183.742
YDL017W	7	125.9	4.00617	0	4	131.528															12	234	15.4637	0	7	183.742
YCL032W	7	126.9	4.21202	0	3	30.4372															14	176.6	4.27919	0	7	182.058
YGL100W	7	126.9	8.9667	1	7	115.921															7	215.9	4.88787	0	7	181.536
YLR400W	7	126.9	4.80493	0	12	331.916															8	23.3	5.01718	0	7	179.823
YPR068C	7	126.9	3.96847	0	16	198.466															7	112.9	5.42431	0	7	174.983
YGL083W	7	127.9	4.00148	1	7	130.658															5	46.6	4.25945	0	7	174.776
YGL098W	7	127.9	5.32602	1	7	117.442															7	137.9	5.53628	0	7	172.495
YDL180W	7	128.9	4.09235	0	4	42.1131															12	238	4.2143	0	7	167.41
YBR283C	7	129.9	4.52055	0	2	231.113															2	170.1	15.7318	0	7	163.897
YGR193C	7	129.9	4.28323	0	7	327.725															3	79.9	6.52681	0	7	161.649
YOR034C	7	129.9	4.06221	0	15	131.02															7	159.9	8.30512	1	7	160.255
YBR086C	7	130.9	5.0854	0	2	126.895															11	140.6	4.01353	0	7	158.604
YBR119W	7	130.9	4.18504	0	2	143.815															5	40.6	4.1467	0	7	156.888
YFR008W	7	130.9	5.53309	0	6	77.0122															12	231	8.0443	0	7	156.888
YLR260W	7	130.9	6.445	0	12	239.675															12	239	5.12402	0	7	155.628
YNR006W	7	130.9	5.03916	0	14	235.717															5	113.6	4.05967	0	7	154.326
YDR352W	7	131.9	4.33443	0	4	366.354															7	153.9	8.3161	1	7	154.326
YGL093W	7	131.9	9.70939	1	7	123.936															14	166.6	5.24366	0	7	151.576
YPR159W	7	131.9	4.72351	0	16	248.669															7	151.9	8.10358	1	7	150.16
YGL067W	7	132.9	11.7376	1	7	139.183															1	77.7	13.3836	0	7	149.387
YGR100W	7	132.9	4.04425	0	7	255.38															2	109.1	4.09801	0	7	149.295
YIL090W	7	132.9	4.46366	0	9	87.0794															7	151.9	22.1476	1	7	149.295
YAL047C	7	133.9	4.92044	0	1	25.588															7	150.9	25.952	1	7	148.981
YDR249C	7	133.9	4.05663	0	4	297.503															12	226	5.014	0	7	147.143
YGR101W	7	133.9	5.2166	0	7	256.537															9	160.9	5.0527	0	7	144.349
YHR061C	7	133.9	4.47018	0	8	66.749															7	138.9	10.5378	1	7	144.349
YJR125C	7	133.9	5.18232	0	10	196.799															7	136.9	17.6512	1	7	139.74
YKL094W	7	133.9	4.82272	0	11	99.924															7	132.9	11.7376	1	7	139.183
YGL069C	7	134.9	7.40793	1	7	138.965															2	102.1	4.31747	0	7	138.807
YDR439W	7	135.9	4.15501	0	4	415.281															14	168	9.54115	0	7	138.807
YER070W	7	135.9	5.48261	0	5	104.659															7	134.9	7.40793	1	7	138.965
YGL080W	7	135.9	4.46257	1	7	132.722															6	35.3	6.04357	0	7	134.675
YDL093W	7	136.9	4.94988	0	4	89.8833															7	135.9	4.46257	1	7	132.722
YGL066W	7	136.9	17.6512	1	7	139.74															7	127.9	4.00148	1	7	130.658
YGL014W	7	137.9	5.53628	0	7	172.495															14	151.6	3.9893	0	7	129.385
YGL095C	7	137.9	5.21726	1	7	122.353															3	71.9	6.86769	0	7	127.734
YMR029C	7	137.9	4.3238	0	13	112.243															7	121.7	4.99805	1	7	127.056
YGL060W	7	138.9	10.5378	1	7	144.349															7	131.9	9.70939	1	7	123.936
YGL130W	7	138.9	4.57696	0	7	98.4871															14	178.6	4.23217	0	7	123.78
YJR124C	7	138.9	4.00192	0	10	196.283															7	137.9	5.21726	1	7	122.353
YMR075W	7	138.9	4.3325	0	13	140.732															7	114.9	11.5668	1	7	120.4
YDR358W	7	139.9	5.00298	0	4	368.908															7	127.9	5.32602	1	7	117.442
YIL044C	7	139.9	4.21671	0	9	123.202															7	126.9	8.9667	1	7	115.921
YIL105C	7	139.9	4.42096	0	9	76.3103															12	234	23.5206	0	7	115.536
YBR062C	7	140.9	4.91112	0	2	109.965															14	169.6	14.6296	0	7	113.344
YMR070W	7	143.9	4.73465	0	13	139.088															7	115.9	8.47222	1	7	112.529
YJL053W	7	144.9	4.57807	0	10	100.783															2	108.1	4.43513	0	7	112.322
YJL071W	7	145.6	4.00968	0	10	91.8268															14	182.6	5.60415	0	7	112.284
YOR334W	7	145.6	4.28592	0	15	311.709															7	114.9	7.58954	1	7	110.921
YAR031W	7	148.9	5.10501	0	1	84.0538															7	297.9	4.26397	0	7	108.072
YDR283C	7	150.9	4.25102	0	4	319.293															7	124.9	4.87406	1	7	106.769
YGL053W	7	150.9	25.952	1	7	148.981															5	59.6	4.85072	0	7	104.046
YAL001C	7	151.9	4.29009	0	1	67.9327															12	236	4.26656	0	7	103.811
YGL050W	7	151.9	8.10358	1	7	150.16															7	288.9	4.14631	0	7	100.848
YGL052W	7	151.9	22.1476	1	7	149.295															5	140.6	5.58333	0	7	100.284
YDR080W	7	152.9	5.07387	0	4	187.235															14	163.6	7.55133	0	7	99.6142
YDL132W	7	153.9	4.09697	0	4	69.5057															7	138.9	4.57696	0	7	98.4871
YGL044C	7	153.9	8.3161	1	7	154.326															14	200.6	4.34948	0	7	98.3812
YGL227W	7	153.9	5.36968	0	7	25.7962															15	50.1	4.25734	0	7	95.3629
YJL020C	7	153.9	4.19996	0	10	120.703															7	82.9	7.99528	1	7	93.9382
YKL092C	7	153.9	4.11725	0	11	102.248															5	112.6	3.97846	0	7	90.6625
YBR081C	7	154.9	4.08878	0	2	121.548															14	169.6	9.11964	0	7	88.197
YLR398C	7	154.9	4.21901	0	12	330.823															14	176.6	4.08235	0	7	80.4849
YOR124C	7	154.9	4.08092	0	15	184.34															13	282.6	4.10801	0	7	80.4849
YBR055C	7	156.9	6.42102	0	2	104.226															7	64.9	5.06163	1	7	79.9562
YPR189W	7	156.9	4.1566	0	16	264.708															4	58.3	4.24613	0	7	77.3331
YGL001C	7	159.9	4.10458	0	7	183.742															7	70.9	7.89424	1	7	75.0115
YGL035C	7	159.9	8.30512	1	7	160.255															12	227	6.09546	0	7	74.2135
YGR012W	7	177.9	5.68293	1	7	189.913															7	64.9	4.36959	1	7	73.3183
YGR010W	7	190.1	4.05065	1	7	189.315															12	225.5	5.68291	0	7	73.3183
YGR013W	7	198.9	6.52644	1	7	190.429															14	156.6	4.46698	0	7	70.7289
YGR029W	7	201.9	13.6723	1	7	201.147															13	103.6	4.77364	0	7	70.4846
YGR040W	7	202.9	5.21401	1	7	212.916															7	51.9	8.31982	1	7	68.6101
YHL010C	7	202.9	4.12251	0	8	25.1284															14	170.6	9.18121	0	7	66.659
YGR039W	7	210.9	33.4156	1	7	212.727															7	54.8	9.47052	1	7	61.1091
YGL005C	7	215.9	4.88787	0	7	181.536															7	54.8	4.0994	1	7	59.2522
YGR057C	7	223.9	5.55804	1	7	224.026															15	153.1	4.24139	0	7	58.3401
YDR309C	7	234.5	4.18424	0	4	334.827															7	54.8	4.7682	1	7	58.1934
YGR080W	7	234.5	4.4291	1	7	237.511															7	54.8	9.44148	1	7	56.5593
YGR111W	7	234.5	5.44479	0	7	264.876															16	17.3	4.08067	0	7	55.5969
YGR064W	7	234.9	5.85335	1	7	228.499															12	235	11.2269	0	7	55.5969
YGR065C	7	236.9	8.29628	1	7	229.325															12	230	6.11887	0	7	55.3549
YGR091W	7	242.9	8.09907	1	7	246.521															12	230	11.8249	0	7	53.6141
YGR077C	7	243.9	7.73645	1	7	236.586															14	168	10.5742	0	7	52.474
YGR104C	7	247.9	13.9568	1	7	258.395															14	162.6	4.07032	0	7	51.8211
YGR099W	7	254.9	8.37499	1	7	254.509															7	60.9	6.00491	1	7	51.8211
YHR071W	7	259.9	3.99144	0	8	71.0944															14	169.6	9.15373	0	7	48.7006
YGR122W	7	261.9	7.06958	1	7	271.598															14	172.6	4.43625	0	7	45.7653
YAR029W	7	267.9	4.25068	0	1	83.8221															10	53.4	4.17327	0	7	41.4792
YAR028W	7	268.9	5.36282	0	1	83.179															5	69.8	4.71029	0	7	41.4792
YML034C-A	7	269.9	4.01616	0	13	71.3166															8	47.3	5.42418	0	7	41.4792
YGR125W	7	271.9	5.96996	1	7	274.7															7	41.9	12.2769	1	7	41.4792
YGR117C	7	272.4	6.47851	1	7	268.83															13	287.6	4.52063	0	7	36.6571
YGR131W	7	272.4	14.5285	1	7	279.277															7	30.9	6.3291	1	7	36.6571
YGR127W	7	275.9	4.62512	1	7	276.351															7	32.9	5.24709	1	7	36.0537
YBR294W	7	280.9	4.15441	0	2	236.749															14	171.6	4.29289	0	7	33.7986
YKL148C	7	280.9	4.01185	0	11	65.0291															14	160.6	4.31421	0	7	31.4376
YER024W	7	282.9	4.06454	0	5	70.777															7	24.9	6.96665	1	7	31.4376
YAR033W	7	283.9	4.27492	0	1	84.6258															7	26.9	6.70788	1	7	30.476
YER091C	7	283.9	4.34837	0	5	119.766															13	282	4.33964	0	7	29.7615
YOL091W	7	286.9	5.70795	0	15	47.9686															14	169.6	8.6379	0	7	29.2023
YGL125W	7	288.9	4.14631	0	7	100.848															7	106.9	4.32275	0	7	28.4743
YLR412C-A	7	289.9	4.44296	0	12	342.145															7	153.9	5.36968	0	7	25.7962
YER043C	7	290.9	8.50583	0	5	83.0074															14	168.6	9.12564	0	7	20.651
YLR180W	7	290.9	12.3408	0	12	185.512															7	14.9	5.98121	1	7	16.8126
YLR128W	7	294.9	4.63671	0	12	143.459															5	123.6	6.20631	0	7	13.1814
YGL115W	7	297.9	4.26397	0	7	108.072															14	158.6	4.00516	0	7	11.614
YPL105C	7	299.2	4.58937	0	16	103.11															7	15.9	8.0594	1	7	10.1522
YPL263C	7	299.2	4.06483	0	16	13.4614															1	21.7	4.66056	0	7	8.83845
YDL025C	7	302.9	4.14771	0	4	126.265															12	150	4.2164	0	7	7.74435
YML070W	7	306.9	4.04025	0	13	45.4071															3	32.9	4.62957	0	7	5.59129
YDR391C	7	307.9	5.00278	0	4	390.001															9	180.9	8.46299	0	7	3.11632
YMR090W	7	307.9	4.0424	0	13	152.737															12	12	6.23159	0	7	1.94784
YDR306C	7	309.9	5.37591	0	4	333.262															12	12	4.59299	0	7	1.01469
YGR173W	7	309.9	6.48075	1	7	312.214															7	110.9	4.75411	0	7	185.003
YGR144W	7	310.9	5.23938	0	7	288.753															7	190.1	4.05065	1	7	189.315
YMR083W	7	316.9	5.42409	0	13	147.815															13	14.6	4.47985	0	7	189.315
YGR184C	7	324.6	11.4481	1	7	320.321															7	177.9	5.68293	1	7	189.913
YPR196W	7	329.9	5.00325	0	16	270.146															7	198.9	6.52644	1	7	190.429
YFL036W	7	331.9	4.34123	0	6	28.1871															14	168	5.73637	0	7	195.262
YLL001W	7	331.9	4.19929	0	12	53.1956															14	175.6	5.8084	0	7	195.866
YGR198W	7	332.9	4.37707	1	7	331.044															14	158.6	5.4976	0	7	197.097
YCR024C	7	333.9	4.97685	0	3	77.8788															6	95.3	5.19657	0	7	197.113
YDR436W	7	333.9	4.4947	0	4	413.771															12	227	4.20654	0	7	200.648
YGR171C	7	333.9	5.68273	0	7	311.731															7	201.9	13.6723	1	7	201.147
YIL155C	7	333.9	5.91756	0	9	24.1439															5	119.6	4.37146	0	7	205.365
YJR100C	7	333.9	4.27336	0	10	185.18															7	210.9	33.4156	1	7	212.727
YLR069C	7	333.9	4.52077	0	12	98.6358															7	202.9	5.21401	1	7	212.916
YLR382C	7	333.9	4.34345	0	12	318.523															16	9.3	4.31111	0	7	213.687
YMR293C	7	333.9	5.523	0	13	291.307															2	173.1	15.4773	0	7	213.687
YGR210C	7	334.9	4.26708	1	7	338.476															2	170.1	4.51078	0	7	216.051
YJR046W	7	334.9	4.38883	0	10	156.615															5	132.6	5.70944	0	7	216.421
YLR437C	7	334.9	4.1149	0	12	364.32															12	234	22.4714	0	7	218.79
YNR050C	7	334.9	4.59459	0	14	264.692															14	269.6	4.89041	0	7	219.632
YOR354C	7	334.9	4.52216	0	15	331.077															14	173.6	5.64288	0	7	220.775
YBR044C	7	336.9	4.12607	0	2	97.8463															7	223.9	5.55804	1	7	224.026
YBR179C	7	336.9	4.09203	0	2	176.712															7	107.9	6.49867	0	7	228.574
YKL093W	7	336.9	3.96527	0	11	100.472															7	234.9	5.85335	1	7	228.499
YLR294C	7	336.9	4.12461	0	12	259.928															7	236.9	8.29628	1	7	229.325
YGR174C	7	337.9	4.87906	0	7	313.158															2	167.1	4.15158	0	7	231.144
YGR208W	7	337.9	8.85298	1	7	337.418															4	92.3	4.79161	0	7	231.144
YHR038W	7	337.9	4.0317	0	8	55.1988															7	338.9	4.39928	0	7	235.869
YHR059W	7	337.9	4.37249	0	8	66.04															14	160.6	5.26072	0	7	235.869
YIL157C	7	337.9	4.15221	0	9	21.3721															7	243.9	7.73645	1	7	236.586
YDR322W	7	338.9	4.00731	0	4	344.289															5	117.6	4.97053	0	7	237.033
YGR076C	7	338.9	4.39928	0	7	235.869															7	234.5	4.4291	1	7	237.511
YML050W	7	338.9	4.43068	0	13	58.8686															14	168.6	8.94729	0	7	239.781
YBR238C	7	339.9	4.3564	0	2	209.224															14	177.6	6.6896	0	7	241.573
YLR125W	7	339.9	4.06218	0	12	141.647															5	120.6	6.73769	0	7	242.185
YGR213C	7	340.9	4.3807	1	7	340.229															7	242.9	8.09907	1	7	246.521
YGR215W	7	340.9	4.16358	1	7	341.234															10	170.4	4.1382	0	7	247.205
YCR003W	7	341.9	4.31151	0	3	56.9355															7	254.9	8.37499	1	7	254.509
YNL315C	7	341.9	3.9725	0	14	16.3892															7	132.9	4.04425	0	7	255.38
YOL071W	7	341.9	4.47106	0	15	64.8076															7	133.9	5.2166	0	7	256.537
YGR212W	7	344.9	12.9271	1	7	339.33															7	247.9	13.9568	1	7	258.395
YGR245C	7	348.9	4.92788	1	7	363.364															5	43.6	4.44437	0	7	260.35
YGR232W	7	352.9	10.0602	1	7	352.989															14	175.6	4.05704	0	7	261.414
YGR238C	7	356.9	11.0887	1	7	358.425															7	234.5	5.44479	0	7	264.876
YJL070C	7	356.9	7.13753	0	10	93.1822															14	168	4.32913	0	7	265.444
YIL014C-A	7	361.9	4.42649	0	9	146.516															7	272.4	6.47851	1	7	268.83
YOR117W	7	368.7	4.38043	0	15	179.859															7	261.9	7.06958	1	7	271.598
YOR197W	7	371.9	3.98074	0	15	236.649															15	59.1	4.68242	0	7	273.821
YGR292W	7	381.9	4.02578	1	7	398.333															7	271.9	5.96996	1	7	274.7
YDR033W	7	387.9	4.93718	0	4	157.556															14	158.6	5.66386	0	7	275.995
YGR287C	7	389.9	8.77617	1	7	395.518															6	87.3	4.42689	0	7	276.351
YBR298C	7	391.5	4.67914	0	2	241.321															7	275.9	4.62512	1	7	276.351
YGR289C	7	391.5	13.013	1	7	398.042															5	117.6	4.52148	0	7	278.951
YGR290W	7	391.5	24.9067	1	7	397.919															7	272.4	14.5285	1	7	279.277
YGR295C	7	391.5	11.3447	1	7	400.601															15	343.1	5.92149	0	7	283.293
YHL034W-A	8	8.3	4.72382	1	8	9.92901															14	170.6	4.38205	0	7	285.125
YHL037C	8	8.3	14.1636	1	8	7.82579															7	310.9	5.23938	0	7	288.753
YHL042W	8	8.3	7.42067	1	8	4.67077															14	158.6	4.11267	0	7	290.612
YHL043W	8	8.3	12.7645	1	8	4.44087															14	168	7.12509	0	7	293.424
YHL048W	8	8.3	14.7479	1	8	1.89002															5	69.8	4.39728	0	7	294.324
YIR043C	8	8.3	7.41335	0	9	197															13	12.6	5.84753	0	7	296.189
YIR044C	8	8.3	15.291	0	9	197.2															5	41.6	4.62227	0	7	298.21
YPL092W	8	8.3	6.5707	0	16	108.436															4	94.3	4.35825	0	7	300.324
YHL035C	8	9.3	12.5132	1	8	9.8027															14	166.6	10.3713	0	7	306.757
YHL026C	8	12.3	13.4244	1	8	16.2411															7	333.9	5.68273	0	7	311.731
YLL053C	8	12.3	5.99472	0	12	12.9038															14	168	5.93957	0	7	311.731
YHR168W	8	13.3	4.44734	0	8	132.131															7	309.9	6.48075	1	7	312.214
YLL052C	8	13.3	6.6507	0	12	13.0478															7	337.9	4.87906	0	7	313.158
YHL023C	8	14.3	6.63107	1	8	18.7663															14	274.6	4.25047	0	7	314.015
YHL044W	8	14.3	6.79265	1	8	4.03988															14	162.6	6.43748	0	7	315.679
YHL047C	8	15.3	5.99571	1	8	3.03383															12	235	9.93815	0	7	317.785
YAL053W	8	16.3	4.72697	0	1	20.6469															4	66.6	4.11828	0	7	317.917
YHL022C	8	16.3	7.56186	1	8	19.2456															12	235	10.3006	0	7	317.917
YPL138C	8	16.3	4.12362	0	16	84.826															7	324.6	11.4481	1	7	320.321
YPL167C	8	16.3	4.90996	0	16	68.7498															14	105.6	4.02199	0	7	324.927
YJL171C	8	17.3	4.67396	0	10	30.2644															7	129.9	4.28323	0	7	327.725
YPL123C	8	17.3	4.53788	0	16	92.5362															14	187.6	6.12146	0	7	330.115
YPL168W	8	17.3	5.41496	0	16	67.0391															7	332.9	4.37707	1	7	331.044
YPL174C	8	17.3	4.65501	0	16	64.5865															7	111.9	4.38711	0	7	332.086
YPL213W	8	17.3	5.19434	0	16	43.6699															14	174.6	5.10365	0	7	334.772
YJL094C	8	18.3	4.0196	0	10	76.3101															7	112.9	5.09285	0	7	334.954
YPL120W	8	18.3	5.1734	0	16	93.4451															4	92.3	4.91249	0	7	336.413
YPL179W	8	18.3	5.74166	0	16	60.3414															7	337.9	8.85298	1	7	337.418
YPL196W	8	18.3	4.49474	0	16	50.7511															7	334.9	4.26708	1	7	338.476
YPR145C-A	8	18.3	5.13075	0	16	239.229															7	344.9	12.9271	1	7	339.33
YBR016W	8	19.3	6.02459	0	2	81.0723															7	340.9	4.3807	1	7	340.229
YOR219C	8	19.3	6.45849	0	15	249.166															7	340.9	4.16358	1	7	341.234
YOR389W	8	19.3	4.09254	0	15	354.48															14	168	4.44899	0	7	341.234
YPL195W	8	19.3	6.06808	0	16	51.0927															13	285.6	4.52889	0	7	345.076
YPL221W	8	19.3	4.21361	0	16	38.5629															14	168	10.1035	0	7	346.686
YPL225W	8	19.3	4.12887	0	16	36.5179															5	116.6	4.26992	0	7	349.735
YPL234C	8	19.3	4.81183	0	16	30.5404															3	27.9	4.45827	0	7	349.735
YPL235W	8	19.3	4.94065	0	16	29.8986															5	124.6	5.15383	0	7	352.226
YPL242C	8	19.3	4.41904	0	16	27.5377															7	352.9	10.0602	1	7	352.989
YPL253C	8	19.3	6.37523	0	16	21.1303															13	9.6	9.43522	0	7	354.557
YPL260W	8	19.3	4.11564	0	16	14.2709															8	75.3	5.43166	0	7	355.183
YPL270W	8	19.3	4.21398	0	16	8.82312															15	87.1	28.6228	0	7	355.183
YPL277C	8	19.3	4.28883	0	16	4.87409															7	356.9	11.0887	1	7	358.425
YBL039W-B	8	20.3	4.7858	0	2	43.0487															14	165.6	6.06173	0	7	362.349
YHL016C	8	20.3	5.46366	1	8	22.2787															2	103.4	4.04218	0	7	363.364
YHR138C	8	20.3	4.5959	0	8	113.34															7	348.9	4.92788	1	7	363.364
YLR187W	8	20.3	5.3747	0	12	188.975															14	183.6	6.32034	0	7	364.177
YOR385W	8	20.3	4.4109	0	15	351.454															14	168	8.32438	0	7	364.433
YPL115C	8	20.3	5.08104	0	16	97.3366															5	123.6	4.95824	0	7	364.804
YPL154C	8	20.3	6.11494	0	16	75.6694															14	171.6	4.7347	0	7	367.591
YPL159C	8	20.3	4.8189	0	16	72.979															14	201.6	3.98938	0	7	373.97
YPL166W	8	20.3	4.03206	0	16	68.8169															11	49.6	4.37176	0	7	373.97
YPL188W	8	20.3	5.99371	0	16	55.488															1	22.7	4.12343	0	7	378.073
YPL218W	8	20.3	5.82792	0	16	40.2065															12	235	17.0237	0	7	378.37
YPL245W	8	20.3	4.10201	0	16	24.7708															14	171.6	8.49371	0	7	381.751
YPL246C	8	20.3	4.77627	0	16	24.6872															14	161.6	5.44808	0	7	387.217
YBR005W	8	21.3	5.19887	0	2	73.758															5	175.6	4.36911	0	7	389.129
YBR030W	8	21.3	4.70454	0	2	89.501															7	108.9	4.24105	0	7	391.719
YDR319C	8	21.3	4.79294	0	4	342.806															3	27.9	4.08078	0	7	392.779
YMR295C	8	21.3	4.06787	0	13	292.022															14	154.6	5.21728	0	7	393.357
YPL128C	8	21.3	5.51328	0	16	89.4182															2	17.1	4.60732	0	7	395.518
YPL222C-A	8	21.3	4.01752	0	16	38.2931															7	389.9	8.77617	1	7	395.518
YPL252C	8	21.3	4.01681	0	16	21.3835															15	53.1	3.99912	0	7	395.999
YPL262W	8	21.3	4.47509	0	16	13.7016															7	391.5	13.013	1	7	398.042
YPL117C	8	22.3	4.20517	0	16	95.3789															7	391.5	24.9067	1	7	397.919
YPL202C	8	22.3	4.14482	0	16	49.0996															7	381.9	4.02578	1	7	398.333
YPL241C	8	22.3	5.54701	0	16	27.8411															2	233.8	4.20643	0	7	398.333
YGL006W	8	23.3	5.01718	0	7	179.823															7	391.5	11.3447	1	7	400.601
YHL014C	8	23.3	10.3258	1	8	23.2019															13	292.6	4.13821	0	7	403.086
YPL098C	8	23.3	5.53374	0	16	105.809															12	376.1	5.27029	0	7	403.375
YPL152W	8	23.3	6.33106	0	16	76.8596															4	464.6	4.2392	0	7	401.391
YHR007C	8	24.3	5.33977	1	8	36.5															14	169.6	11.1053	0	8	29.7774
YPL122C	8	24.3	3.97404	0	16	93.066															4	156.3	4.70618	0	8	29.7777
YPL125W	8	24.3	4.79982	0	16	90.9205															13	286.6	4.48894	0	8	29.6505
YPL139C	8	25.3	4.22793	0	16	84.4259															8	29.3	6.57092	1	8	29.3324
YPL140C	8	25.3	4.43123	0	16	83.8395															8	28.3	8.81874	1	8	29.3938
YHL009C	8	26.3	10.077	1	8	25.531															8	27.3	47.1882	1	8	28.3681
YHL008C	8	27.3	47.1882	1	8	28.3681															13	53.6	4.47373	0	8	25.531
YCR038W-A	8	27.4	4.79505	0	3	95.6761															8	26.3	10.077	1	8	25.531
YHL007C	8	28.3	8.81874	1	8	29.3938															16	128.4	4.16935	0	8	25.7863
YJL166W	8	28.3	5.41521	0	10	31.9319															15	71.1	5.57898	0	8	25.7863
YEL007W	8	29.3	5.98294	0	5	49.7108															15	71.1	7.22488	0	8	25.7863
YHL006W-A	8	29.3	6.57092	1	8	29.3324															7	202.9	4.12251	0	8	25.1284
YNL187W	8	32.3	4.94218	0	14	106.545															5	114.6	4.20537	0	8	24.4953
YPL229W	8	32.3	5.97365	0	16	33.9197															8	23.3	10.3258	1	8	23.2019
YNR044W	8	33.3	4.08204	0	14	260.374															8	20.3	5.46366	1	8	22.2787
YER173W	8	34.3	4.26235	0	5	187.678															7	115.9	4.62722	0	8	21.0855
YPL271W	8	34.3	7.24818	0	16	8.70622															14	176.6	4.77681	0	8	20.9146
YHR156C	8	35.3	4.09767	0	8	123.763															8	16.3	7.56186	1	8	19.2456
YKL197C	8	35.3	4.10931	0	11	28.0638															8	14.3	6.63107	1	8	18.7663
YLR195C	8	35.3	4.17472	0	12	195.625															8	12.3	13.4244	1	8	16.2411
YIL092W	8	36.3	4.09025	0	9	85.0433															9	60.9	4.15567	0	8	14.6163
YLR236C	8	36.3	6.36823	0	12	220.364															14	169.6	6.49455	0	8	12.0064
YBL061C	8	38.3	7.23313	0	2	32.2331															8	8.3	4.72382	1	8	9.92901
YDR128W	8	40.3	4.67061	0	4	219.986															8	9.3	12.5132	1	8	9.8027
YHR032W	8	40.3	9.34154	1	8	51.9724															15	52.1	4.04609	0	8	7.8444
YEL027W	8	41.3	4.63666	0	5	35.2767															8	8.3	14.1636	1	8	7.82579
YHR016C	8	41.3	5.02665	1	8	41.4544															10	13.4	5.41436	0	8	4.67077
YHR026W	8	44.3	5.33071	1	8	48.2192															16	111	6.96816	0	8	4.67077
YHR034C	8	45.3	5.36934	1	8	53.3732															8	8.3	7.42067	1	8	4.67077
YHR017W	8	46.3	5.67652	1	8	41.5903															10	14.4	5.34922	0	8	4.44087
YGL204C	8	47.3	5.42418	0	7	41.4792															16	111	10.2076	0	8	4.44087
YHR031C	8	47.3	6.58409	1	8	51.8599															8	8.3	12.7645	1	8	4.44087
YHR021W-A	8	49.7	16.012	1	8	44.742															8	14.3	6.79265	1	8	4.03988
YHR028C	8	49.7	7.10707	1	8	50.1941															8	15.3	5.99571	1	8	3.03383
YHR033W	8	49.7	15.8359	1	8	52.6356															8	8.3	14.7479	1	8	1.89002
YBL008W	8	54.3	3.97715	0	2	62.8744															12	376.1	4.33943	0	8	0.538511
YHR035W	8	60.3	7.67368	1	8	53.4394															12	376.1	5.31866	0	8	0.212564
YHR043C	8	60.3	11.1319	1	8	58.0511															12	235	8.98962	0	8	32.353
YHR069C-A	8	60.3	4.49688	1	8	70.5655															15	235.1	3.98939	0	8	34.7696
YHR044C	8	62.3	12.3683	1	8	58.4311															2	103.4	4.14174	0	8	34.7696
YHR053C	8	64.3	14.333	1	8	63.8237															12	231	5.20398	0	8	34.7696
YHR055C	8	64.3	14.3642	1	8	64.4249															14	170.6	6.49614	0	8	34.7696
YHR052W-A	8	64.9	24.6437	1	8	63.7605															8	24.3	5.33977	1	8	36.5
YHR054W-A	8	64.9	23.1469	1	8	64.3617															12	255	8.85495	0	8	36.5
YHR058C	8	64.9	8.11388	1	8	65.973															12	236	4.58796	0	8	36.8238
YHR062C	8	64.9	3.98855	1	8	67.1319															14	177.6	4.9163	0	8	36.8238
YHR054C	8	65.3	13.2563	1	8	64.2837															12	239	5.24348	0	8	37.0707
YHR056C	8	65.3	11.5979	1	8	65.3598															4	261.3	4.03123	0	8	37.6962
YHR065C	8	65.3	17.5883	1	8	68.7111															11	155.6	5.05459	0	8	37.6962
YHR064C	8	68.3	6.85329	1	8	68.1439															14	168	6.13964	0	8	38.3243
YGR234W	8	75.3	5.43166	0	7	355.183															8	41.3	5.02665	1	8	41.4544
YER090W	8	79.3	5.16613	0	5	118.293															8	46.3	5.67652	1	8	41.5903
YMR062C	8	79.3	4.97489	0	13	134.74															14	163.6	4.02158	0	8	42.4007
YHR103W	8	100.3	6.39673	1	8	96.1124															8	49.7	16.012	1	8	44.742
YHR112C	8	100.3	10.858	1	8	100.699															5	126.6	4.59563	0	8	45.0771
YHR119W	8	101.8	4.04051	1	8	103.82															14	159.6	4.64892	0	8	45.4725
YHR202W	8	117.3	4.53299	0	8	150.74															14	171.6	10.2107	0	8	47.7248
YAL064W-B	8	121.2	4.10886	0	1	5.39648															8	44.3	5.33071	1	8	48.2192
YJR062C	8	121.2	5.25082	0	10	166.433															7	113.9	8.25166	0	8	48.2192
YLL005C	8	124.3	4.61029	0	12	50.548															8	49.7	7.10707	1	8	50.1941
YHR216W	8	152.3	4.80602	1	8	166.363															14	160.6	4.47037	0	8	51.8599
YAR073W	8	153.3	5.53687	0	1	102.461															8	47.3	6.58409	1	8	51.8599
YHR180W	8	153.3	6.78529	1	8	139.55															8	40.3	9.34154	1	8	51.9724
YAR060C	8	154.3	4.43142	0	1	97.8486															12	17	5.52344	0	8	52.6356
YFL065C	8	154.3	4.30691	0	6	1.56437															8	49.7	15.8359	1	8	52.6356
YHR211W	8	156	23.3715	1	8	157.658															8	45.3	5.36934	1	8	53.3732
YHR214C-E	8	156	4.58741	1	8	165.493															8	60.3	7.67368	1	8	53.4394
YAR068W	9	13.9	6.80795	0	1	100.06															11	157.6	5.31163	0	8	54.5702
YHR214W-A	9	13.9	7.39757	0	8	162.945															7	337.9	4.0317	0	8	55.1988
YIL163C	9	13.9	10.9425	1	9	16.7464															14	168	5.37001	0	8	55.1988
YIL166C	9	13.9	25.8757	1	9	14.6399															5	115.6	4.57475	0	8	57.1477
YIL169C	9	13.9	15.3892	1	9	11.7333															8	60.3	11.1319	1	8	58.0511
YIL173W	9	13.9	6.518	1	9	5.15574															8	62.3	12.3683	1	8	58.4311
YJL222W	9	13.9	6.52558	0	10	3.47369															9	90.9	4.10857	0	8	58.6547
YLL018C	9	13.9	4.64837	0	12	40.1202															15	80.1	4.17546	0	8	60.3876
YIL168W	9	14.9	6.23934	1	9	13.0502															12	231	10.8298	0	8	61.3797
YIL167W	9	18.9	7.8286	1	9	13.2231															12	232	12.2422	0	8	62.914
YIL158W	9	19.9	7.47969	1	9	20.7693															8	64.9	24.6437	1	8	63.7605
YPR011C	9	20.9	4.20675	0	16	169.36															5	23.6	4.21636	0	8	63.8237
YPL013C	9	23.9	4.40662	0	16	153.488															8	64.3	14.333	1	8	63.8237
YBR302C	9	24.9	5.4553	0	2	243.422															8	65.3	13.2563	1	8	64.2837
YIL134W	9	24.9	3.98083	1	9	43.7881															8	64.9	23.1469	1	8	64.3617
YIL139C	9	26.9	4.01315	1	9	39.8812															5	23.6	4.36886	0	8	64.4249
YML132W	9	26.9	4.11975	0	13	2.43496															8	64.3	14.3642	1	8	64.4249
YDR316W	9	28.9	4.16453	0	4	339.051															8	65.3	11.5979	1	8	65.3598
YDR296W	9	29.9	4.14469	0	4	327.077															14	154.6	4.89563	0	8	65.973
YMR188C	9	32.9	4.39984	0	13	216.613															8	64.9	8.11388	1	8	65.973
YIL121W	9	51.9	5.18537	1	9	59.481															2	103.4	3.97418	0	8	66.04
YIL148W	9	51.9	4.61534	0	9	30.8869															7	337.9	4.37249	0	8	66.04
YHL028W	9	60.9	4.15567	0	8	14.6163															14	168	8.54589	0	8	66.04
YIL119C	9	62.9	15.5093	1	9	62.0178															7	133.9	4.47018	0	8	66.749
YBR195C	9	69.1	5.87682	0	2	183.551															8	64.9	3.98855	1	8	67.1319
YIL110W	9	70.9	4.41677	1	9	70.1979															2	145.1	4.0137	0	8	67.554
YIL111W	9	72.9	6.10726	1	9	69.8279															3	27.9	3.9768	0	8	68.1439
YIL116W	9	72.9	16.571	1	9	64.2925															8	68.3	6.85329	1	8	68.1439
YER130C	9	77.9	4.29435	0	5	147.902															8	65.3	17.5883	1	8	68.7111
YHR045W	9	90.9	4.10857	0	8	58.6547															4	395.3	4.64551	0	8	68.8003
YIL089W	9	94.9	9.78755	1	9	87.9803															14	156.6	5.46592	0	8	69.2894
YIL084C	9	95.9	8.47401	1	9	91.4241															8	60.3	4.49688	1	8	70.5655
YIL083C	9	98.7	7.61514	1	9	92.0508															7	259.9	3.99144	0	8	71.0944
YIL072W	9	101.9	14.547	1	9	101.924															15	54.1	5.99609	0	8	71.0944
YIL071W-A	9	102.9	4.73356	1	9	102.801															12	235	11.4859	0	8	71.7208
YIL082W-A	9	102.9	5.26036	1	9	92.4923															4	385.3	5.09083	0	8	72.7631
YIL087C	9	102.9	9.60397	1	9	90.0124															14	164.6	5.3689	0	8	72.7631
YIL100W	9	103.9	5.3874	0	9	79.7864															11	135.6	4.49944	0	8	74.8747
YIL080W	9	106.9	4.62615	1	9	92.4923															4	261.3	4.26468	0	8	81.7509
YIL061C	9	107.9	8.17916	1	9	110.462															16	134.3	7.84652	0	8	82.2137
YPL240C	9	111.9	4.17575	0	16	28.5596															5	62.6	4.42065	0	8	82.9885
YIL059C	9	113.9	4.57321	1	9	111.072															14	169.6	15.104	0	8	85.9931
YIL065C	9	114.9	4.48435	1	9	108.757															4	66.6	7.88382	0	8	87.7544
YIL012W	9	116.9	5.79397	0	9	149.894															5	120.6	5.57344	0	8	89.4793
YIL031W	9	116.9	4.47559	1	9	131.674															14	168	5.3397	0	8	94.9569
YIL028W	9	121.9	6.59162	1	9	135.945															8	100.3	6.39673	1	8	96.1124
YIL029C	9	127.9	38.0966	1	9	135.565															4	32.3	4.14366	0	8	99.0889
YIL014C-A	9	140.9	18.4827	1	9	146.516															14	160.6	5.06348	0	8	99.9196
YIL010W	9	149.9	4.84434	1	9	150.738															13	46.8	5.73406	0	8	100.699
YIL003W	9	156.9	6.27493	1	9	157.145															8	100.3	10.858	1	8	100.699
YJR112W-A	9	159.9	4.02693	0	10	191.336															14	170.6	4.09429	0	8	102.504
YGL060W	9	160.9	5.0527	0	7	144.349															12	230	4.36051	0	8	102.504
YJL166W	9	166.9	3.97708	0	10	31.9319															8	101.8	4.04051	1	8	103.82
YIR032C	9	177.9	7.40893	1	9	187.045															12	238	4.70791	0	8	110.391
YGL259W	9	180.9	8.46299	0	7	3.11632															5	136.6	4.04029	0	8	111.041
YIR026C	9	182.7	4.20263	1	9	182.702															13	282	4.73759	0	8	111.551
YIR030W-A	9	182.7	4.92689	1	9	185.822															14	170.6	4.68806	0	8	112.321
YIR031C	9	182.7	20.6689	1	9	186.623															13	9.6	12.0574	0	8	112.558
YIR039C	9	182.7	25.2849	1	9	194.468															12	247.4	4.08943	0	8	112.741
YIR042C	9	182.7	28.2162	1	9	196.212															8	20.3	4.5959	0	8	113.34
YFL055W	10	10.4	6.02124	0	6	8.12746															5	126.6	7.68933	0	8	113.791
YIL173W	10	10.4	7.18328	0	9	5.15574															12	62	4.02979	0	8	114.204
YJL213W	10	10.4	10.351	1	10	9.6784															5	134.6	6.19643	0	8	114.204
YJL215C	10	10.4	18.0652	1	10	8.06124															2	171.1	14.2116	0	8	115.689
YJL216C	10	10.4	14.8033	1	10	7.85579															14	158.6	4.76032	0	8	117.129
YJL217W	10	10.4	12.082	1	10	6.97014															14	174.6	4.0491	0	8	118.101
YJL218W	10	10.4	10.4626	1	10	6.62223															5	116.6	5.88308	0	8	119.041
YJL219W	10	10.4	5.37391	1	10	5.87963															14	165.6	4.29058	0	8	119.219
YJL222W	10	10.4	7.14947	1	10	3.47369															7	115.9	6.36581	0	8	120.301
YHL042W	10	13.4	5.41436	0	8	4.67077															8	35.3	4.09767	0	8	123.763
YHL043W	10	14.4	5.34922	0	8	4.44087															14	180.6	12.4241	0	8	125.191
YJL179W	10	24.4	6.35571	1	10	26.6248															15	49.2	4.73863	0	8	125.302
YJL171C	10	29.4	5.54731	1	10	30.2644															14	165.6	6.88942	0	8	127.149
YJL163C	10	30.4	6.56796	1	10	34.009															13	67.6	4.06041	0	8	131.105
YJL181W	10	35.4	7.39555	1	10	25.689															8	13.3	4.44734	0	8	132.131
YIR027C	10	36.4	4.18659	0	9	183.456															7	112.9	4.62085	0	8	135.868
YPL268W	10	40.4	4.3784	0	16	10.2															12	213	4.16287	0	8	136.981
YLR059C	10	41.4	4.29911	0	12	93.8166															4	385.3	4.03147	0	8	139.55
YJL161W	10	51.4	5.1001	1	10	35.1865															8	153.3	6.78529	1	8	139.55
YJL121C	10	52.4	9.94068	1	10	57.3475															14	175.6	4.44325	0	8	140.163
YNL321W	10	52.4	4.07831	0	14	12.8355															2	128.1	4.7962	0	8	140.459
YGL204C	10	53.4	4.17327	0	7	41.4792															13	15.6	5.61184	0	8	141.284
YJL159W	10	54.4	4.12517	1	10	36.1509															12	228	17.1984	0	8	145.462
YMR148W	10	54.4	4.78333	0	13	190.53															14	178.6	4.47299	0	8	146.058
YJL132W	10	55.4	6.7935	1	10	48.6121															10	56.4	5.44218	0	8	146.609
YHR194W	10	56.4	5.44218	0	8	146.609															15	84.1	4.32324	0	8	149.547
YJL122W	10	56.4	5.72834	1	10	56.9361															11	113.6	4.76721	0	8	150.366
YJR103W	10	56.4	4.42132	0	10	186.209															8	117.3	4.53299	0	8	150.74
YJL105W	10	58.4	5.8741	1	10	67.5145															5	99.6	5.97234	0	8	152.839
YOR349W	10	58.4	4.47831	0	15	326.642															15	219.1	4.01684	0	8	154.982
YJL119C	10	60.4	4.75375	1	10	57.5885															5	44.6	4.28473	0	8	156.561
YJL108C	10	64.4	7.36883	1	10	65.6591															8	156	23.3715	1	8	157.658
YER119C	10	67.4	4.38722	0	5	140.315															1	16.7	4.94243	0	8	162.282
YMR087W	10	67.4	5.23142	0	13	150.45															6	31.3	7.96677	0	8	162.282
YJL107C	10	68.4	10.4028	1	10	66.0063															13	9.6	5.09079	0	8	165.326
YJL126W	10	71.4	4.51265	1	10	55.3745															8	156	4.58741	1	8	165.493
YJL068C	10	79.4	9.32953	1	10	94.1685															13	9.6	6.41821	0	8	165.493
YMR306C-A	10	81.4	4.19258	0	13	301.455															9	13.9	7.39757	0	8	162.945
YDR534C	10	83.1	4.21307	0	4	466.5															13	9.6	11.2017	0	8	165.673
YJL077C	10	83.1	9.77591	1	10	88.4959															12	224	4.72362	0	8	166.363
YJL077W-B	10	83.1	12.4784	1	10	88.1908															8	152.3	4.80602	1	8	166.363
YJL057C	10	94.4	4.11427	1	10	99.0445															7	22.9	5.80286	0	8	167.157
YJL056C	10	97.4	4.77663	1	10	99.9326															4	464.6	4.58502	0	8	168.024
YNL024C	10	111.4	3.97457	0	14	217.481															12	376.1	4.89011	0	8	168.549
YNL120C	10	111.4	4.05275	0	14	148.541															4	464.6	3.98602	0	8	168.097
YJL043W	10	112.4	7.63415	1	10	108.048															12	376.1	4.40224	0	8	168.097
YJL070C	10	114.4	6.31985	0	10	93.1822															12	222	4.70549	0	9	159.311
YOR006C	10	114.4	4.11689	0	15	111.733															2	181.1	4.72518	0	9	159.082
YJL001W	10	118.4	4.00151	1	10	130.56															9	156.9	6.27493	1	9	157.145
YOR323C	10	120.4	4.05068	0	15	304.553															7	107.9	5.33821	0	9	154.87
YLR130C	10	124.4	4.962	0	12	145.446															7	113.9	5.26847	0	9	151.213
YDL037C	10	128.4	3.99724	0	4	119.551															9	149.9	4.84434	1	9	150.738
YJR010C-A	10	132.4	10.4421	1	10	137.541															5	126.6	9.8545	0	9	150.216
YJR014W	10	133.4	4.88851	1	10	138.584															9	116.9	5.79397	0	9	149.894
YDR463W	10	134.4	4.67397	0	4	429.914															15	79.1	4.20581	0	9	146.516
YJR015W	10	137.4	16.9802	1	10	138.853															7	361.9	4.42649	0	9	146.516
YJR025C	10	154.4	15.1505	1	10	141.533															6	39.3	5.25226	0	9	146.516
YJR032W	10	155.4	6.11888	1	10	147.344															9	140.9	18.4827	1	9	146.516
YJR056C	10	158.4	12.1604	1	10	162.738															3	79.9	7.29485	0	9	145.079
YJR060W	10	159.2	24.7281	1	10	164.61															5	61.6	4.0691	0	9	141.808
YJR061W	10	159.2	7.85889	1	10	165.135															14	169.6	7.17518	0	9	141.685
YJR055W	10	159.4	5.776	1	10	161.621															4	403.3	3.99772	0	9	141.075
YJR062C	10	164.4	9.46282	1	10	166.433															14	176.6	5.82941	0	9	140.036
YJR024C	10	165.4	4.38498	0	10	141.322															14	168	9.16031	0	9	138.576
YPL270W	10	168.4	4.83954	0	16	8.82312															14	211.1	4.07761	0	9	136.85
YGR092W	10	170.4	4.1382	0	7	247.205															9	121.9	6.59162	1	9	135.945
YJR094W-A	10	170.4	3.98765	1	10	182.464															9	127.9	38.0966	1	9	135.565
YPL148C	10	171.4	3.9625	0	16	79.1237															5	117.6	6.57833	0	9	135.002
YPL189W	10	171.4	4.1303	0	16	54.8361															9	116.9	4.47559	1	9	131.674
YPL262W	10	172.4	4.57107	0	16	13.7016															13	86.6	3.99652	0	9	131.531
YJR084W	10	175.4	5.27564	1	10	175.077															5	119.6	4.45383	0	9	123.688
YJR082C	10	176.3	8.52507	1	10	174.635															7	139.9	4.21671	0	9	123.202
YJR088C	10	176.3	5.8416	1	10	176.167															2	103.4	4.1495	0	9	120.489
YJR094C	10	176.3	18.2469	1	10	181.666															14	165.6	7.8541	0	9	120.489
YJR104C	10	176.3	6.90388	1	10	186.889															14	164.6	7.47484	0	9	119.428
YJR108W	10	176.3	19.8842	1	10	188.604															7	49.9	5.21668	0	9	116.192
YJR112W-A	10	176.3	7.39284	1	10	191.336															9	113.9	4.57321	1	9	111.072
YER039C-A	10	184.4	4.79216	0	5	80.3328															9	107.9	8.17916	1	9	110.462
YJR113C	10	187.4	4.01709	1	10	191.692															9	114.9	4.48435	1	9	108.757
YJR115W	10	189.4	7.74409	1	10	191.983															12	235	7.29042	0	9	108.277
YOR160W	10	189.4	3.9779	0	15	209.133															14	168	7.06103	0	9	103.937
YDR408C	10	190.4	4.13714	0	4	399.527															9	102.9	4.73356	1	9	102.801
YML119W	10	191.4	4.04785	0	13	10.3827															14	172.6	8.86673	0	9	102.801
Q0110	10	192.4	4.94085	0	17	NA															9	101.9	14.547	1	9	101.924
YDR260C	10	192.4	4.52366	0	4	302.913															13	9.6	4.44424	0	9	101.567
YJR127C	10	194.4	13.1855	1	10	198.923															1	87.7	5.02441	0	9	100.072
Q0255	10	195.4	5.16616	0	17	NA															5	126.6	4.23958	0	9	97.131
YJR129C	10	195.4	11.7328	1	10	199.51															14	168	4.21768	0	9	95.5782
Q0182	10	195.9	4.08512	0	17	NA															9	106.9	4.62615	1	9	92.4923
YLR122C	10	195.9	5.54565	0	12	140.874															9	102.9	5.26036	1	9	92.4923
YLL038C	10	196.4	4.57137	0	12	23.9025															9	98.7	7.61514	1	9	92.0508
YDR517W	10	198.4	4.90863	0	4	457.917															9	95.9	8.47401	1	9	91.4241
YJR135C	10	199.4	9.79815	1	10	203.029															7	29.9	5.26147	0	9	90.0124
YMR017W	10	199.4	4.21933	0	13	104.508															9	102.9	9.60397	1	9	90.0124
YDL248W	10	200.4	5.18916	0	4	0.515328															9	94.9	9.78755	1	9	87.9803
YJR128W	10	200.4	15.2624	1	10	198.882															7	132.9	4.46366	0	9	87.0794
YER113C	10	201.4	4.06637	0	5	136.526															8	36.3	4.09025	0	9	85.0433
YOR176W	10	201.4	4.69269	0	15	218.578															14	168	9.0773	0	9	84.9165
YNL077W	10	202.4	4.03651	0	14	178.491															5	121.6	4.20927	0	9	84.3986
YER099C	10	204.4	4.15717	0	5	125.669															4	393.3	4.46379	0	9	82.3732
YJR149W	10	204.4	5.38302	1	10	212.122															14	171.6	5.4983	0	9	79.9249
YOR105W	10	206.4	4.71099	0	15	171.027															9	103.9	5.3874	0	9	79.7864
YDL246C	10	209.4	7.67111	0	4	2.98121															3	33.9	5.03927	0	9	78.0865
YIL151C	10	209.4	4.23268	0	9	27.2844															7	139.9	4.42096	0	9	76.3103
YDL247W-A	10	211.4	7.93921	0	4	1.12296															5	113.6	4.57041	0	9	76.3103
YJR159W	10	211.4	9.06271	1	10	220.782															5	122.6	4.85239	0	9	74.5659
YKR079C	10	211.4	4.64986	0	11	223.769															15	49.2	5.0424	0	9	72.3747
YLR346C	10	211.4	4.52241	0	12	296.139															9	70.9	4.41677	1	9	70.1979
YJR161C	10	212.4	9.1903	1	10	223.168															9	72.9	6.10726	1	9	69.8279
YDL247W	10	213.6	12.688	0	4	1.81213															12	231	7.95283	0	9	69.8279
YFL059W	10	213.6	6.31837	0	6	5.41837															5	42.6	3.96319	0	9	67.472
YFL060C	10	213.6	5.5319	0	6	5.22915															14	161.6	4.74049	0	9	67.472
YJR154W	10	213.6	4.68873	1	10	217.705															14	168.6	9.618	0	9	66.896
YJR160C	10	213.6	12.2319	1	10	221.913															9	72.9	16.571	1	9	64.2925
YNL333W	10	213.6	5.26601	0	14	4.90267															9	62.9	15.5093	1	9	62.0178
YNL334C	10	213.6	5.95813	0	14	4.75801															2	113.1	3.96461	0	9	60.4596
YKL186C	11	34.7	4.78815	1	11	35.4323															9	51.9	5.18537	1	9	59.481
YOR290C	11	37.6	4.0038	0	15	283.893															12	242	24.6266	0	9	59.481
YOR308C	11	40.6	3.97222	0	15	295.805															14	171.6	6.07482	0	9	51.1788
YKL187C	11	43.6	8.77002	1	11	34.7617															4	39.3	3.98118	0	9	45.1869
YML017W	11	43.6	5.22818	0	13	80.4076															9	24.9	3.98083	1	9	43.7881
YKL184W	11	44.6	7.37484	1	11	36.749															14	172.6	5.86329	0	9	43.7881
YGR258C	11	49.6	4.37176	0	7	373.97															14	175.6	5.38725	0	9	41.7133
YKL201C	11	49.6	12.8315	0	11	25.637															9	26.9	4.01315	1	9	39.8812
YFR016C	11	51.6	5.17661	0	6	86.7232															7	91.9	5.35669	0	9	37.3301
YDR280W	11	53.6	4.40979	0	4	316.415															9	51.9	4.61534	0	9	30.8869
YOR083W	11	57	4.24755	0	15	158.247															10	209.4	4.23268	0	9	27.2844
YJL206C	11	64.6	4.54617	0	10	14.9985															11	136.6	4.25073	0	9	27.2844
YKL162C-A	11	68.6	7.60063	1	11	55.5208															5	56.6	5.21602	0	9	27.2844
YKL135C	11	70.6	4.39207	1	11	71.6707															5	60.6	4.3269	0	9	24.1439
YER168C	11	71.6	4.666	0	5	182.916															7	333.9	5.91756	0	9	24.1439
YKL147C	11	71.6	4.18159	1	11	65.4231															7	337.9	4.15221	0	9	21.3721
YKL115C	11	79.6	6.23242	1	11	84.6877															9	19.9	7.47969	1	9	20.7693
YKL119C	11	79.6	4.60078	1	11	83.1406															9	13.9	10.9425	1	9	16.7464
YKL130C	11	79.6	18.7513	1	11	74.4706															14	166.6	5.10385	0	9	15.5929
YOR377W	11	79.6	4.39829	0	15	345.247															12	278	4.46895	0	9	14.6399
YKL121W	11	82.6	5.54727	1	11	81.2106															9	13.9	25.8757	1	9	14.6399
YKL138C-A	11	85.6	4.45591	1	11	70.2947															9	18.9	7.8286	1	9	13.2231
YKL114C	11	88.6	6.47605	1	11	85.1326															9	14.9	6.23934	1	9	13.0502
YKL116C	11	92.6	4.49045	1	11	84.5412															9	13.9	15.3892	1	9	11.7333
YKL096W	11	101.5	4.52631	1	11	99.0809															7	100	4.42732	0	9	5.15574
YML105C	11	101.5	3.97535	0	13	19.9497															12	143	6.31731	0	9	5.15574
YNR032W	11	105.6	5.35152	0	14	253.84															9	13.9	6.518	1	9	5.15574
YBL020W	11	106.6	4.46075	0	2	54.7279															10	10.4	7.18328	0	9	5.15574
YOR103C	11	106.6	4.04568	0	15	170.582															4	464.6	4.31396	0	9	2.05285
YKL079W	11	109.6	4.36515	1	11	108.769															12	376.1	4.06032	0	9	0.364134
YJL093C	11	110.6	5.11481	0	10	77.0195															13	9.6	4.48545	0	9	166.49
YNL101W	11	110.6	4.2266	0	14	160.958															4	255.7	4.15144	0	9	168.467
YKL054C	11	111.6	5.02258	1	11	128.602															14	167.6	5.72375	0	9	168.566
YPR116W	11	112.6	4.16166	0	16	220.038															14	156.6	6.9388	0	9	171.903
YHR201C	11	113.6	4.76721	0	8	150.366															14	270.6	4.49903	0	9	172.209
YKR072C	11	113.6	4.01434	0	11	219.509															14	161.6	4.4855	0	9	173.1
YKL067W	11	114.6	5.3465	1	11	119.498															1	81.7	4.91526	0	9	177.175
YDR108W	11	115.6	5.01603	0	4	208.117															5	130.7	11.8108	0	9	177.175
YDR172W	11	117.6	4.35598	0	4	250.614															7	105.9	5.07624	0	9	179.449
YKL068W-A	11	119.6	8.37151	1	11	117.366															9	182.7	4.20263	1	9	182.702
YML110C	11	119.6	4.21676	0	13	17.3147															10	36.4	4.18659	0	9	183.456
YDL221W	11	122.6	4.16208	0	4	19.1941															12	229	4.44995	0	9	184.88
YNL197C	11	127.6	3.99739	0	14	99.7132															9	182.7	4.92689	1	9	185.822
YMR016C	11	128.6	4.34901	0	13	103.864															9	182.7	20.6689	1	9	186.623
YOR370C	11	128.6	3.99744	0	15	340.228															9	177.9	7.40893	1	9	187.045
YBL064C	11	129.6	5.19303	0	2	30.3548															14	165.6	4.281	0	9	187.273
YKL044W	11	130.6	9.24699	1	11	135.282															13	9.6	6.35956	0	9	189.349
YKL043W	11	132.6	7.92069	1	11	135.444															5	130.7	3.99128	0	9	194.468
YDR148C	11	133.6	5.78429	0	4	234.1															9	182.7	25.2849	1	9	194.468
YKL049C	11	134.6	5.34415	1	11	131.648															9	182.7	28.2162	1	9	196.212
YBR151W	11	135.6	5.18933	0	2	163.532															8	8.3	7.41335	0	9	197
YHR075C	11	135.6	4.49944	0	8	74.8747															8	8.3	15.291	0	9	197.2
YML004C	11	135.6	4.19055	0	13	89.2748															10	118.4	4.00151	1	10	130.56
YIL151C	11	136.6	4.25073	0	9	27.2844															14	272.6	4.75037	0	10	126.497
YKL128C	11	136.6	4.10929	0	11	76.5141															13	9.6	8.07002	0	10	124.01
YMR315W	11	136.6	4.65136	0	13	306.976															5	167.6	4.0768	0	10	120.85
YOR148C	11	136.6	4.19889	0	15	201.004															7	153.9	4.19996	0	10	120.703
YKR098C	11	139.6	4.23058	0	11	241.242															14	170.6	5.12183	0	10	120.703
YLR422W	11	139.6	7.51522	0	12	347.702															1	23.7	5.06913	0	10	117.707
YMR258C	11	139.6	5.07129	0	13	266.614															2	179.1	5.3626	0	10	115.894
YGL036W	11	140.6	4.01353	0	7	158.604															10	112.4	7.63415	1	10	108.048
YJR149W	11	143.6	4.12825	0	10	212.122															12	238	5.93529	0	10	107.912
YML035C	11	143.6	5.23235	0	13	70.9888															14	168.6	6.672	0	10	105.647
YJR022W	11	145.6	4.04504	0	10	140.968															5	116.6	4.0899	0	10	104.608
YKL025C	11	146.6	4.76139	1	11	148.95															12	234	15.0814	0	10	104.608
YKL017C	11	151.6	4.97785	1	11	154.624															14	172.6	4.17985	0	10	101.953
YLR323C	11	153.6	4.24786	0	12	280.429															7	144.9	4.57807	0	10	100.783
YHR009C	11	155.6	5.05459	0	8	37.6962															10	97.4	4.77663	1	10	99.9326
YHR037W	11	157.6	5.31163	0	8	54.5702															10	94.4	4.11427	1	10	99.0445
YKL010C	11	157.6	4.29559	1	11	161.692															14	250.6	4.74711	0	10	96.0041
YLR142W	11	157.6	6.81977	0	12	153.034															14	168	8.23877	0	10	94.9387
YPR021C	11	157.6	5.00879	0	16	174.964															10	79.4	9.32953	1	10	94.1685
YKL006C-A	11	164.6	8.04971	1	11	163.429															10	114.4	6.31985	0	10	93.1822
YKR013W	11	171.6	4.43209	1	11	176.143															7	356.9	7.13753	0	10	93.1822
YML076C	11	173.6	4.03893	0	13	39.2412															7	145.6	4.00968	0	10	91.8268
YKL064W	11	180.6	4.28834	0	11	120.621															14	175.6	5.88701	0	10	91.8268
YKR017C	11	187.6	4.11057	1	11	179.708															10	83.1	9.77591	1	10	88.4959
YKR031C	11	193.6	7.61077	1	11	192.254															10	83.1	12.4784	1	10	88.1908
YKR039W	11	204.6	5.78844	1	11	195.545															2	173.1	12.8866	0	10	88.1709
YKR079C	11	223.6	4.92012	1	11	223.769															5	59.6	4.60818	0	10	87.206
YKR068C	11	224.6	10.6522	1	11	216.764															14	171.6	5.82432	0	10	86.7403
YKR089C	11	228.6	7.80143	1	11	231.03															14	172.6	5.06697	0	10	83.6157
YDL050C	11	230.6	4.11653	0	4	113.096															14	169.6	16.995	0	10	83.3633
YKR087C	11	231.6	7.91145	1	11	229.455															15	57.1	4.18418	0	10	80.6073
YKR101W	11	231.6	4.02882	1	11	243.279															13	30.6	5.43675	0	10	80.6073
YOR350C	11	234.6	4.8555	0	15	328.316															4	36.3	4.13721	0	10	77.0195
YCL074W	11	240.8	5.64098	0	3	1.33803															11	110.6	5.11481	0	10	77.0195
YGL262W	12	12	6.23159	0	7	1.94784															8	18.3	4.0196	0	10	76.3101
YGL263W	12	12	4.59299	0	7	1.01469															14	168	9.10246	0	10	73.9303
YLL049W	12	12	4.36773	1	12	14.5973															12	230	7.34833	0	10	71.1685
YLL061W	12	12	5.59549	1	12	6.42184															14	172.6	5.91804	0	10	69.384
YLL063C	12	12	4.47825	1	12	5.74352															14	168	5.09392	0	10	68.1946
YPR127W	12	13	4.74557	0	16	229.143															10	58.4	5.8741	1	10	67.5145
YLL054C	12	16	6.19324	1	12	12.6313															14	168	4.04418	0	10	66.4176
YHR033W	12	17	5.52344	0	8	52.6356															10	68.4	10.4028	1	10	66.0063
YLL028W	12	29	5.02534	1	12	30.4843															10	64.4	7.36883	1	10	65.6591
YPR006C	12	42	4.01157	0	16	164.995															14	168	6.40016	0	10	61.6023
YLL010C	12	49	4.89526	1	12	46.9728															15	71.1	6.54253	0	10	59.3905
YHR140W	12	62	4.02979	0	8	114.204															15	72.1	7.40133	0	10	59.3905
YLR035C	12	64	7.05848	1	12	77.1977															15	315.1	4.07518	0	10	58.48
YLR030W	12	74.2	23.7818	1	12	73.1717															5	113.6	5.02102	0	10	57.5118
YLR031W	12	74.2	21.3663	1	12	73.5088															10	60.4	4.75375	1	10	57.5885
YLR036C	12	76	16.38	1	12	79.9654															10	52.4	9.94068	1	10	57.3475
YLR032W	12	79	11.9371	1	12	73.785															10	56.4	5.72834	1	10	56.9361
YLR041W	12	82	4.05889	1	12	82.5777															14	174.6	7.54514	0	10	56.0266
YLR053C	12	87	8.47549	1	12	89.4462															10	71.4	4.51265	1	10	55.3745
YBR067C	12	93	6.93317	0	2	111.828															5	138.6	5.11639	0	10	48.6121
YLR074C	12	97.6	7.38398	1	12	101.713															10	55.4	6.7935	1	10	48.6121
YOR375C	12	97.6	4.8826	0	15	344.198															14	266.6	4.53398	0	10	44.507
YDL171C	12	100	4.03105	0	4	48.2328															4	395.3	4.1865	0	10	43.0264
YFL022C	12	100	4.60308	0	6	45.5777															14	165.6	6.1794	0	10	41.2466
YLR063W	12	101	5.85165	1	12	95.1182															14	175.6	3.9732	0	10	40.8839
YLR073C	12	101	4.85383	1	12	101.412															10	54.4	4.12517	1	10	36.1509
YOR093C	12	101	4.26343	0	15	165.831															10	51.4	5.1001	1	10	35.1865
YER102W	12	104	4.06427	0	5	127.08															10	30.4	6.56796	1	10	34.009
YPR035W	12	105	4.05393	0	16	186.235															5	122.6	5.27092	0	10	33.3541
YER171W	12	107	5.21252	0	5	184.458															14	168	4.43213	0	10	32.843
YKL024C	12	108	4.08604	0	11	149.276															9	166.9	3.97708	0	10	31.9319
YKL080W	12	108	4.15074	0	11	108.17															12	235	4.44037	0	10	31.9319
YBR127C	12	112	5.06013	0	2	147.867															8	28.3	5.41521	0	10	31.9319
YLR093C	12	122	11.2867	1	12	117.855															12	235	15.5099	0	10	31.5045
YLR091W	12	127	6.12087	1	12	116.068															3	81.9	5.4806	0	10	30.5308
YLR441C	12	129	4.20269	0	12	366.801															8	17.3	4.67396	0	10	30.2644
YLR111W	12	135	5.08486	1	12	133.351															10	29.4	5.54731	1	10	30.2644
YLR105C	12	142	9.04664	1	12	125.372															10	24.4	6.35571	1	10	26.6248
YIL173W	12	143	6.31731	0	9	5.15574															14	163.6	7.75796	0	10	26.5569
YJL222W	12	143	6.31633	0	10	3.47369															10	35.4	7.39555	1	10	25.689
YJL219W	12	145	4.85597	0	10	5.87963															14	177.6	4.8044	0	10	24.8858
YJL216C	12	146	5.68259	0	10	7.85579															14	168	6.19006	0	10	23.7746
YJL217W	12	146	5.77412	0	10	6.97014															4	387.3	4.41092	0	10	20.6384
YJL218W	12	146	4.87387	0	10	6.62223															12	231	4.54112	0	10	18.2628
YGL255W	12	150	4.2164	0	7	7.74435															5	120.6	6.24764	0	10	18.2628
YER135C	12	154	4.74859	0	5	153.459															14	47.6	4.13216	0	10	15.9609
YFL052W	12	156	4.56407	0	6	13.5197															13	284.6	4.53118	0	10	15.9609
YFL055W	12	156	6.06421	0	6	8.12746															11	64.6	4.54617	0	10	14.9985
YLR152C	12	157	5.82439	1	12	160.048															13	282.6	5.22013	0	10	14.2497
YDL243C	12	157.9	4.58792	0	4	5.71247															14	168	7.38649	0	10	14.2497
YFL053W	12	157.9	4.05809	0	6	11.2102															14	175.6	4.33009	0	10	12.3793
YFL054C	12	157.9	4.98195	0	6	10.9047															10	10.4	10.351	1	10	9.6784
YFL056C	12	157.9	4.03973	0	6	7.37203															6	19.3	28.7526	0	10	8.09603
YLR144C	12	157.9	5.32789	1	12	155.487															10	10.4	18.0652	1	10	8.06124
YLR378C	12	163	4.42785	0	12	315.804															12	146	5.68259	0	10	7.85579
YLR169W	12	166	4.67428	1	12	180.128															10	10.4	14.8033	1	10	7.85579
YOR002W	12	166	4.44565	0	15	108.697															12	146	5.77412	0	10	6.97014
YDL042C	12	168	11.846	0	4	117.331															5	170.6	6.31565	0	10	6.97014
YLR156W	12	170	22.1698	1	12	169.944															10	10.4	12.082	1	10	6.97014
YLR157W-D	12	170	22.0161	1	12	171.262															12	146	4.87387	0	10	6.62223
YLR159W	12	170	22.3136	1	12	174.719															5	169.6	5.76124	0	10	6.62223
YLR157W-E	12	171	22.8652	1	12	173.466															10	10.4	10.4626	1	10	6.62223
YLR161W	12	171	21.7288	1	12	176.037															5	173.6	4.24001	0	10	5.87963
YLR155C	12	172	22.4069	1	12	169.328															12	145	4.85597	0	10	5.87963
YLR157C	12	172	22.5337	1	12	170.646															10	10.4	5.37391	1	10	5.87963
YLR158C	12	172	22.7275	1	12	174.103															7	100	4.23789	0	10	3.47369
YLR160C	12	172	22.1641	1	12	175.42															12	143	6.31633	0	10	3.47369
YLR165C	12	173	12.019	1	12	178.296															9	13.9	6.52558	0	10	3.47369
YLR179C	12	177	7.69618	1	12	185.314															10	10.4	7.14947	1	10	3.47369
YLR164W	12	184	4.48571	1	12	177.8															4	464.6	4.90361	0	10	1.40605
YKL219W	12	188	4.09351	0	11	5.54355															12	376.1	4.24303	0	10	0.280759
YLR402W	12	195	4.20961	0	12	332.814															7	107.9	4.45162	0	10	131.053
YDR097C	12	204	5.12441	0	4	199.611															3	75.9	5.78154	0	10	133.478
YLR125W	12	204	4.25762	0	12	141.647															5	63.6	4.23878	0	10	135.756
YLR227C	12	211	5.29363	1	12	213.158															10	132.4	10.4421	1	10	137.541
YHR177W	12	213	4.16287	0	8	136.981															10	133.4	4.88851	1	10	138.584
YLR224W	12	214	6.63579	1	12	211.156															1	58.7	5.88127	0	10	138.853
YOR136W	12	214	4.2078	0	15	191.455															10	137.4	16.9802	1	10	138.853
YEL066W	12	215	4.01522	0	5	9.31348															2	203.1	5.01079	0	10	139.898
YDR270W	12	217	4.05816	0	4	311.743															11	145.6	4.04504	0	10	140.968
YNL222W	12	217	4.62622	0	14	84.7496															12	232	4.0128	0	10	141.094
YDR013W	12	218	4.95706	0	4	146.693															10	165.4	4.38498	0	10	141.322
YOR334W	12	218	4.17846	0	15	311.709															10	154.4	15.1505	1	10	141.533
YNL014W	12	219	4.14138	0	14	224.336															14	269.6	4.48866	0	10	145.882
YLR237W	12	220	7.40479	1	12	220.453															14	168	7.10121	0	10	147.264
YML008C	12	220	7.0988	0	13	85.9806															10	155.4	6.11888	1	10	147.344
YLR199C	12	221	5.59388	0	12	197.562															14	171.6	8.47022	0	10	148.952
YOR303W	12	221	4.13628	0	15	291.355															2	33.1	4.1229	0	10	149.223
Q0255	12	222	3.98258	0	17	NA															2	110.1	4.09134	0	10	151.234
YIL001W	12	222	4.70549	0	9	159.311															7	121.7	5.05115	0	10	155.758
YMR038C	12	222	6.81615	0	13	118.375															7	334.9	4.38883	0	10	156.615
YKL020C	12	223	4.64165	0	11	152.667															5	52.6	4.72074	0	10	156.615
YLR241W	12	223	6.55072	1	12	223.363															12	231	4.31151	0	10	157.613
YAR073W	12	224	4.51711	0	1	102.461															12	233	25.2828	0	10	157.899
YHR216W	12	224	4.72362	0	8	166.363															13	185.6	4.15768	0	10	161.621
YMR016C	12	224	3.98483	0	13	103.864															10	159.4	5.776	1	10	161.621
YDL236W	12	225.5	4.05464	0	4	9.96987															10	158.4	12.1604	1	10	162.738
YFR018C	12	225.5	5.91921	0	6	88.3944															10	159.2	24.7281	1	10	164.61
YGL162W	12	225.5	5.68291	0	7	73.3183															10	159.2	7.85889	1	10	165.135
YJR150C	12	225.5	5.40027	0	10	212.885															8	121.2	5.25082	0	10	166.433
YLR245C	12	225.5	13.4939	1	12	225.681															10	164.4	9.46282	1	10	166.433
YGL056C	12	226	5.014	0	7	147.143															14	168	5.25702	0	10	172.159
YBR163W	12	227	4.90363	0	2	169.719															10	176.3	8.52507	1	10	174.635
YBR201C-A	12	227	6.63967	0	2	187.403															10	175.4	5.27564	1	10	175.077
YDL086C-A	12	227	4.74989	0	4	93.6507															10	176.3	5.8416	1	10	176.167
YDR502C	12	227	8.47062	0	4	450.847															12	232	5.98322	0	10	179.465
YGL160W	12	227	6.09546	0	7	74.2135															14	165.6	9.09486	0	10	179.465
YGR028W	12	227	4.20654	0	7	200.648															10	176.3	18.2469	1	10	181.666
YLR244C	12	227	23.8467	1	12	225.466															10	170.4	3.98765	1	10	182.464
YLR300W	12	227	7.55439	0	12	262.428															5	57.6	4.14473	0	10	183.7
YER011W	12	228	10.8635	0	5	61.3626															2	103.4	4.10674	0	10	185.18
YHR190W	12	228	17.1984	0	8	145.462															7	333.9	4.27336	0	10	185.18
YKL031W	12	228	5.05903	0	11	145.073															14	158.6	5.25348	0	10	185.18
YLR281C	12	228	4.26069	0	12	253.766															14	168	7.0678	0	10	185.451
YML058W-A	12	228	4.50542	0	13	53.9898															10	56.4	4.42132	0	10	186.209
YOR241W	12	228	4.60317	0	15	259.728															4	90.3	4.71834	0	10	186.889
YDL178W	12	229	6.07846	0	4	43.2374															10	176.3	6.90388	1	10	186.889
YFR015C	12	229	4.55786	0	6	84.6301															10	176.3	19.8842	1	10	188.604
YIR029W	12	229	4.44995	0	9	184.88															12	232	4.05848	0	10	190.079
YLR154C	12	229	4.3001	0	12	161.357															2	32.1	4.14409	0	10	190.079
YLR248W	12	229	5.30156	1	12	228.314															9	159.9	4.02693	0	10	191.336
YLR413W	12	229	5.17233	0	12	342.391															10	176.3	7.39284	1	10	191.336
YPR150W	12	229	5.4233	0	16	240.984															10	187.4	4.01709	1	10	191.692
YGL188C	12	230	6.11887	0	7	55.3549															10	189.4	7.74409	1	10	191.983
YGL191W	12	230	11.8249	0	7	53.6141															3	36.9	4.53918	0	10	192.605
YHR116W	12	230	4.36051	0	8	102.504															4	141.7	4.66816	0	10	194.145
YJL100W	12	230	7.34833	0	10	71.1685															4	91.3	4.53589	0	10	194.29
YLL055W	12	230	4.24568	0	12	10.7975															14	164.6	8.28463	0	10	194.942
YLR231C	12	230	9.69054	1	12	218.57															7	138.9	4.00192	0	10	196.283
YMR220W	12	230	13.8917	0	13	242.171															12	234	4.02139	0	10	196.283
YPL028W	12	230	9.55573	0	16	144.416															7	133.9	5.18232	0	10	196.799
YBR242W	12	231	7.60839	0	2	211.438															5	66.6	4.34852	0	10	198.923
YDR297W	12	231	10.8626	0	4	327.491															10	194.4	13.1855	1	10	198.923
YFL058W	12	231	7.74201	0	6	6.17044															10	200.4	15.2624	1	10	198.882
YGL039W	12	231	8.0443	0	7	156.888															10	195.4	11.7328	1	10	199.51
YHR005C-A	12	231	5.20398	0	8	34.7696															14	169.6	4.77977	0	10	200.143
YHR048W	12	231	10.8298	0	8	61.3797															10	199.4	9.79815	1	10	203.029
YIL111W	12	231	7.95283	0	9	69.8279															14	173.6	12.8129	0	10	205.36
YJL198W	12	231	4.54112	0	10	18.2628															3	35.9	5.1397	0	10	207.143
YJR047C	12	231	4.31151	0	10	157.613															14	168	5.30332	0	10	208.691
YLR038C	12	231	12.0985	0	12	81.0616															5	95.6	4.45192	0	10	209.124
YLR100W	12	231	10.8693	0	12	123.084															7	111.9	4.89513	0	10	210.163
YNR041C	12	231	4.44475	0	14	259.621															1	18.7	4.72354	0	10	210.817
YOL026C	12	231	5.37289	0	15	90.5318															2	166.1	4.57378	0	10	211.142
YOR010C	12	231	8.3661	0	15	114.481															2	169.1	7.56191	0	10	211.235
YER014W	12	232	5.72772	0	5	63.9308															5	133.6	7.88007	0	10	211.699
YHR051W	12	232	12.2422	0	8	62.914															11	143.6	4.12825	0	10	212.122
YJR023C	12	232	4.0128	0	10	141.094															5	53.6	4.409	0	10	212.122
YJR091C	12	232	5.98322	0	10	179.465															10	204.4	5.38302	1	10	212.122
YJR110W	12	232	4.05848	0	10	190.079															14	168.6	6.87026	0	10	212.122
YJR156C	12	232	9.21433	0	10	218.848															12	225.5	5.40027	0	10	212.885
YLR153C	12	232	22.1148	0	12	161.09															14	169.6	6.01374	0	10	215.87
YML126C	12	232	18.3366	0	13	6.95502															5	114.6	6.93929	0	10	216.815
YMR208W	12	232	13.951	0	13	232.724															10	213.6	4.68873	1	10	217.705
YNL332W	12	232	8.71805	0	14	5.48169															12	232	9.21433	0	10	218.848
YNR043W	12	232	14.9261	0	14	259.708															10	211.4	9.06271	1	10	220.782
YOR066W	12	232	8.23127	0	15	148.29															10	213.6	12.2319	1	10	221.913
YAL028W	12	233	10.0545	0	1	41.8266															10	212.4	9.1903	1	10	223.168
YCR048W	12	233	5.80443	0	3	101.742															2	12.1	6.57203	0	11	166.816
YCR073C	12	233	6.6937	0	3	118.363															2	103.4	4.4692	0	11	166.098
YDL086W	12	233	17.9255	0	4	93.4416															14	171.6	5.93909	0	11	166.098
YDL244W	12	233	7.7319	0	4	4.98021															5	110.6	4.36126	0	11	165.373
YDR011W	12	233	6.54767	0	4	144.446															11	164.6	8.04971	1	11	163.429
YDR213W	12	233	8.20906	0	4	275.782															12	235	6.50425	0	11	162.707
YEL034W	12	233	7.26951	0	5	29.9782															2	214.1	4.26811	0	11	161.831
YJR048W	12	233	25.2828	0	10	157.899															11	157.6	4.29559	1	11	161.692
YKL038W	12	233	4.46928	0	11	138.812															14	168	6.13472	0	11	161.692
YLR205C	12	233	22.3267	0	12	199.365															15	49.2	4.08397	0	11	155.119
YLR256W	12	233	25.3503	1	12	232.688															11	151.6	4.97785	1	11	154.624
YLR275W	12	233	4.6319	1	12	249.946															12	223	4.64165	0	11	152.667
YMR171C	12	233	5.14287	0	13	205.885															14	161.6	5.24263	0	11	152.667
YMR256C	12	233	10.3874	0	13	264.86															14	162.6	4.32674	0	11	150.834
YNL052W	12	233	14.9496	0	14	197.173															12	108	4.08604	0	11	149.276
YNL111C	12	233	19.9662	0	14	154.395															14	173.6	4.44064	0	11	149.276
YOR387C	12	233	4.27657	0	15	353.169															11	146.6	4.76139	1	11	148.95
YPR010C-A	12	233	13.5081	0	16	168.929															4	50.3	4.62245	0	11	145.235
YBR085W	12	234	11.2015	0	2	124.773															12	228	5.05903	0	11	145.073
YDL093W	12	234	5.1188	0	4	89.8833															14	175.6	4.91144	0	11	141.178
YDL174C	12	234	16.5277	0	4	45.7388															12	233	4.46928	0	11	138.812
YDR044W	12	234	6.73105	0	4	169.486															11	132.6	7.92069	1	11	135.444
YEL024W	12	234	15.7415	0	5	37.5554															11	130.6	9.24699	1	11	135.282
YGL001C	12	234	15.4637	0	7	183.742															15	49.2	4.23287	0	11	132.674
YGL101W	12	234	23.5206	0	7	115.536															11	134.6	5.34415	1	11	131.648
YGR049W	12	234	22.4714	0	7	218.79															11	111.6	5.02258	1	11	128.602
YJL048C	12	234	15.0814	0	10	104.608															11	180.6	4.28834	0	11	120.621
YJR124C	12	234	4.02139	0	10	196.283															14	163.6	4.85299	0	11	120.621
YLR255C	12	234	8.58099	1	12	232.522															11	114.6	5.3465	1	11	119.498
YML054C	12	234	25.8119	0	13	56.8901															14	172.6	5.79048	0	11	117.744
YML054C-A	12	234	6.14296	0	13	57.0506															11	119.6	8.37151	1	11	117.366
YML075C	12	234	17.6818	0	13	40.449															4	377.3	4.0496	0	11	112.507
YML120C	12	234	5.32329	0	13	10.1087															5	60.6	4.15755	0	11	109.622
YMR009W	12	234	12.3333	0	13	96.5545															11	109.6	4.36515	1	11	108.769
YMR015C	12	234	20.1276	0	13	102.807															14	165.6	4.57089	0	11	108.769
YMR134W	12	234	15.0281	0	13	182.884															1	22.7	4.02654	0	11	108.17
YMR145C	12	234	10.991	0	13	189.209															12	108	4.15074	0	11	108.17
YMR202W	12	234	9.17312	0	13	226.982															5	119.6	4.49994	0	11	107.357
YNL100W	12	234	7.478	0	14	161.927															14	168	5.164	0	11	105.444
YOR317W	12	234	8.18315	0	15	300.079															5	124.6	4.26661	0	11	102.701
YPR151C	12	234	26.8991	0	16	241.18															7	153.9	4.11725	0	11	102.248
YPR191W	12	234	6.19629	0	16	266.664															7	336.9	3.96527	0	11	100.472
YBR182C-A	12	235	11.8579	0	2	178.644															4	94.3	4.09362	0	11	100.472
YDR047W	12	235	4.21771	0	4	171.097															5	63.6	4.93825	0	11	100.472
YDR384C	12	235	5.53062	0	4	385.03															7	133.9	4.82272	0	11	99.924
YDR511W	12	235	5.661	0	4	455.675															5	108.8	4.94428	0	11	99.924
YGL187C	12	235	11.2269	0	7	55.5969															11	101.5	4.52631	1	11	99.0809
YGR182C	12	235	9.93815	0	7	317.785															14	170.6	9.45443	0	11	94.4367
YGR183C	12	235	10.3006	0	7	317.917															1	33.7	4.59722	0	11	90.1073
YGR266W	12	235	17.0237	0	7	378.37															5	125.6	6.02088	0	11	87.1957
YHR001W-A	12	235	8.98962	0	8	32.353															11	88.6	6.47605	1	11	85.1326
YHR072W	12	235	11.4859	0	8	71.7208															14	275.5	6.47712	0	11	85.1326
YIL066C	12	235	7.29042	0	9	108.277															5	169	6.05163	0	11	84.6877
YJL166W	12	235	4.44037	0	10	31.9319															11	79.6	6.23242	1	11	84.6877
YJL167W	12	235	15.5099	0	10	31.5045															11	92.6	4.49045	1	11	84.5412
YKL008C	12	235	6.50425	0	11	162.707															11	79.6	4.60078	1	11	83.1406
YKR046C	12	235	22.5307	0	11	199.349															4	390.5	4.03965	0	11	81.2106
YLR034C	12	235	5.44015	0	12	76.288															3	28.9	4.83683	0	11	81.2106
YLR050C	12	235	6.55384	0	12	88.5974															11	82.6	5.54727	1	11	81.2106
YLR228C	12	235	6.5188	1	12	216.898															11	136.6	4.10929	0	11	76.5141
YLR265C	12	235	9.62457	1	12	243.131															11	79.6	18.7513	1	11	74.4706
YLR395C	12	235	10.1119	0	12	327.573															11	70.6	4.39207	1	11	71.6707
YNR019W	12	235	10.6589	0	14	246.201															14	168	7.72875	0	11	70.5484
YOR065W	12	235	13.2949	0	15	147.632															11	85.6	4.45591	1	11	70.2947
YOR356W	12	235	5.02572	0	15	332.394															5	116.6	4.09659	0	11	67.8304
YPR065W	12	235	6.10593	0	16	197.111															5	58.6	4.52688	0	11	67.059
YBR062C	12	236	5.03694	0	2	109.965															15	53.1	4.01802	0	11	65.2771
YDR119W-A	12	236	5.41814	0	4	214.239															5	119.6	4.56036	0	11	65.2771
YDR322W	12	236	4.09558	0	4	344.289															14	157.6	4.71594	0	11	65.2771
YER044C	12	236	19.3215	0	5	83.3215															11	71.6	4.18159	1	11	65.4231
YER053C	12	236	4.52221	0	5	90.8933															7	280.9	4.01185	0	11	65.0291
YGL122C	12	236	4.26656	0	7	103.811															4	95.3	5.85669	0	11	65.0291
YHR007C-A	12	236	4.58796	0	8	36.8238															14	168	10.2125	0	11	61.317
YMR070W	12	236	7.91772	0	13	139.088															7	112.9	4.71413	0	11	55.5208
YMR080C	12	236	5.54342	0	13	146.058															11	68.6	7.60063	1	11	55.5208
YMR110C	12	236	4.62147	0	13	167.288															5	35.6	7.98754	0	11	54.884
YNR007C	12	236	5.54429	0	14	236.878															14	172.6	5.19439	0	11	54.2819
YOR229W	12	236	8.90798	0	15	253.59															5	57.6	5.3923	0	11	51.574
YBR183W	12	237	8.64363	0	2	178.812															14	162.6	4.81544	0	11	50.976
YDL210W	12	237	5.09431	0	4	26.1035															14	185.6	6.23311	0	11	50.7203
YEL039C	12	237	11.5438	0	5	27.9811															14	172.6	7.56794	0	11	49.6438
YEL047C	12	237	10.1335	0	5	23.3656															5	113.6	4.1616	0	11	45.1367
YER053C-A	12	237	16.6873	0	5	91.386															3	69.9	7.27357	0	11	43.551
YLR092W	12	237	4.75615	0	12	116.517															1	12.7	3.98057	0	11	38.2388
YNL124W	12	237	3.97321	0	14	145.342															14	162.6	4.70261	0	11	37.4965
YOR348C	12	237	6.00004	0	15	326.309															11	44.6	7.37484	1	11	36.749
YDR529C	12	238	8.72662	0	4	463.911															2	171.1	4.98464	0	11	35.8895
YFR033C	12	238	11.7028	0	6	107.895															14	168	5.77283	0	11	35.8895
YGL022W	12	238	4.2143	0	7	167.41															11	34.7	4.78815	1	11	35.4323
YHR131C	12	238	4.70791	0	8	110.391															11	43.6	8.77002	1	11	34.7617
YJL044C	12	238	5.93529	0	10	107.912															5	112.6	4.38549	0	11	33.7191
YNL156C	12	238	18.5354	0	14	126.56															5	114.6	4.45542	0	11	30.7814
YNL279W	12	238	4.75694	0	14	41.0714															14	168	5.81736	0	11	29.8759
YGL040C	12	239	5.12402	0	7	155.628															8	35.3	4.10931	0	11	28.0638
YHR008C	12	239	5.24348	0	8	37.0707															11	49.6	12.8315	0	11	25.637
YML057W	12	239	9.89983	0	13	54.4716															14	166.6	5.01859	0	11	24.0804
YML125C	12	239	9.17602	0	13	7.35085															14	173.6	4.11862	0	11	18.3326
YDR232W	12	240	4.52363	0	4	287.471															3	69.9	7.58922	0	11	17.6129
YKR047W	12	240	7.0626	0	11	199.418															14	170.6	5.8657	0	11	14.9098
YPL189C-A	12	240	5.28658	0	16	54.6505															5	33.6	18.7695	0	11	9.62085
YFR038W	12	241	4.02761	0	6	110.112															4	93.3	4.34576	0	11	8.48783
YLR326W	12	241	5.66366	0	12	281.588															12	188	4.09351	0	11	5.54355
YDL110C	12	242	6.41436	0	4	82.1577															13	303	6.87307	0	11	4.30565
YDR186C	12	242	5.0171	0	4	259.023															13	282	4.10475	0	11	168.082
YIL121W	12	242	24.6266	0	9	59.481															13	287.6	4.63521	0	11	171.679
YPR193C	12	242	4.52729	0	16	267.826															5	120.6	4.52113	0	11	173.521
YLR432W	12	244	4.19294	0	12	360.91															11	171.6	4.43209	1	11	176.143
YML081W	12	244	7.32085	0	13	35.6459															14	168	6.30559	0	11	178.329
YPL257W	12	244	5.20468	0	16	18.3154															11	187.6	4.11057	1	11	179.708
YCR005C	12	245	4.23733	0	3	58.7168															14	165.6	4.40411	0	11	181.942
YER141W	12	245	4.85772	0	5	158.738															2	199.1	4.16985	0	11	183.425
YLR276C	12	245	7.84585	1	12	250.831															15	49.2	4.27039	0	11	186.547
YHR137W	12	247.4	4.08943	0	8	112.741															14	162.6	4.00008	0	11	189.933
YCR094W	12	251	5.85049	0	3	137.629															11	193.6	7.61077	1	11	192.254
YPL013C	12	253	4.36529	0	16	153.488															11	204.6	5.78844	1	11	195.545
YHR007C	12	255	8.85495	0	8	36.5															14	163.6	5.85934	0	11	196.736
YLL012W	12	255	5.47895	0	12	45.1446															5	137.6	5.15435	0	11	197.241
YMR252C	12	258	4.91137	0	13	263.7															12	235	22.5307	0	11	199.349
YMR322C	12	258	4.9331	0	13	312.512															12	240	7.0626	0	11	199.418
YOR391C	12	258	4.20713	0	15	356.145															14	153.6	4.96926	0	11	208.031
YPL280W	12	258	5.02723	0	16	3.42924															5	53.6	6.15998	0	11	208.61
YDR143C	12	259	5.72963	0	4	230.629															2	60.1	4.27826	0	11	212.492
YNR047W	12	259	4.2132	0	14	262.156															7	121.7	4.14009	0	11	214.858
YER042W	12	260	5.43034	0	5	82.2433															5	120.6	4.15243	0	11	215.354
YPL039W	12	260	4.09809	0	16	138.941															11	224.6	10.6522	1	11	216.764
YPL117C	12	260	6.01206	0	16	95.3789															11	113.6	4.01434	0	11	219.509
YOR024W	12	261	4.26544	0	15	124.673															10	211.4	4.64986	0	11	223.769
YPL170W	12	261	7.05073	0	16	66.1959															2	202.1	4.8114	0	11	223.769
YLR310C	12	263	5.67854	1	12	272.533															11	223.6	4.92012	1	11	223.769
YLR290C	12	264	4.52931	1	12	258.465															14	168	4.62525	0	11	227.722
YLR299W	12	264	14.4548	1	12	261.386															11	231.6	7.91145	1	11	229.455
YLR313C	12	268.3	7.29514	1	12	274.456															7	119.9	4.78111	0	11	229.907
YIL166C	12	278	4.46895	0	9	14.6399															11	228.6	7.80143	1	11	231.03
YLR329W	12	283	5.27319	1	12	283.122															3	43.9	4.00841	0	11	231.251
YLR352W	12	284	4.03688	1	12	299.212															5	136.6	4.18101	0	11	241.242
YNL105W	12	284	4.03689	0	14	156.936															11	139.6	4.23058	0	11	241.242
YLR342W	12	296	7.62976	1	12	291.597															11	231.6	4.02882	1	11	243.279
YLL052C	12	297	4.0388	0	12	13.0478															7	331.9	4.19929	0	12	53.1956
YLL053C	12	299	4.51712	0	12	12.9038															8	124.3	4.61029	0	12	50.548
YDR261C	12	303	5.33779	0	4	303.528															12	49	4.89526	1	12	46.9728
YLR375W	12	311.8	7.37955	1	12	313.837															14	164.6	4.9287	0	12	46.9728
YLR389C	12	318	6.1356	1	12	324.951															12	255	5.47895	0	12	45.1446
YLR374C	12	323	4.88586	1	12	313.889															5	127.6	5.7366	0	12	45.1446
YDR043C	12	324	4.29501	0	4	168.476															9	13.9	4.64837	0	12	40.1202
YLR407W	12	327	6.59165	1	12	335.839															14	165.6	6.70604	0	12	40.1202
YLR003C	12	338	5.26709	0	12	56.7436															14	268.6	4.67183	0	12	39.1833
YDR327W	12	340	4.15712	0	4	348.869															14	174.6	7.78019	0	12	31.8589
YLR411W	12	340	29.9933	1	12	340.985															12	29	5.02534	1	12	30.4843
YOR137C	12	341	4.31666	0	15	192.587															15	48.1	10.6374	0	12	30.4843
YLR425W	12	353	7.54713	1	12	353.825															13	285.6	4.67572	0	12	27.5843
YLR424W	12	355.6	8.41462	1	12	350.403															14	165.6	7.48681	0	12	27.5843
YLR457C	12	375	17.6664	1	12	380.44															10	196.4	4.57137	0	12	23.9025
YLR459W	12	375	7.20643	1	12	380.643															14	167.6	4.83453	0	12	23.9025
YBL113W-A	12	376.1	5.34749	0	2	0.160431															13	9.6	4.09735	0	12	18.8892
YDR545C-A	12	376.1	5.21338	0	4	474.696															3	29.9	4.48287	0	12	18.8892
YEL075W-A	12	376.1	5.26584	0	5	1.68499															12	12	4.36773	1	12	14.5973
YEL077W-A	12	376.1	4.9904	0	5	0.201079															12	297	4.0388	0	12	13.0478
YER190C-B	12	376.1	4.72532	0	5	201.623															8	13.3	6.6507	0	12	13.0478
YFL066C	12	376.1	4.38886	0	6	1.21715															12	299	4.51712	0	12	12.9038
YFL068W	12	376.1	5.83956	0	6	-0.0132554															8	12.3	5.99472	0	12	12.9038
YGR296C-B	12	376.1	5.27029	0	7	403.375															12	16	6.19324	1	12	12.6313
YHL050C	12	376.1	4.33943	0	8	0.538511															12	230	4.24568	0	12	10.7975
YHL050W-A	12	376.1	5.31866	0	8	0.212564															12	12	5.59549	1	12	6.42184
YHR219C-A	12	376.1	4.89011	0	8	168.549															12	12	4.47825	1	12	5.74352
YHR219W	12	376.1	4.40224	0	8	168.097															5	190.9	13.5039	0	12	4.17877
YIL177W-A	12	376.1	4.06032	0	9	0.364134															12	376.1	4.58662	0	12	3.35931
YJL225W-A	12	376.1	4.24303	0	10	0.280759															4	464.6	4.73032	0	12	3.35931
YLL066C	12	376.1	4.58662	0	12	3.35931															12	376.1	4.62963	0	12	2.29214
YLL066W-A	12	376.1	4.62963	0	12	2.29214															7	21.9	5.58628	0	12	1.97494
YLL067C	12	376.1	4.22846	0	12	1.36647															12	376.1	4.22846	0	12	1.36647
YLL067W-A	12	376.1	5.04371	0	12	0.260414															4	464.6	4.43054	0	12	1.36647
YLR456W	12	376.1	12.043	1	12	379.828															12	376.1	5.04371	0	12	0.260414
YLR460C	12	376.1	5.59038	1	12	381.922															12	338	5.26709	0	12	56.7436
YLR463C	12	376.1	4.5213	1	12	384.057															7	100.9	3.96171	0	12	58.9657
YLR465C	12	376.1	6.54496	1	12	384.25															4	262.3	5.00851	0	12	59.7554
YLR466C-A	12	376.1	6.11448	1	12	385.516															14	169.6	9.74825	0	12	59.7554
YLR466C-B	12	376.1	6.55685	1	12	385.819															14	172.6	5.76961	0	12	61.269
YLR466W	12	376.1	4.39945	1	12	384.154															5	140.6	4.49843	0	12	63.0524
YLR467C-A	12	376.1	5.56142	1	12	387.915															14	165.6	6.31776	0	12	63.9109
YLR467W	12	376.1	4.40997	1	12	386.106															4	31.3	4.14784	0	12	70.7133
YML133W-B	12	376.1	4.71647	0	13	0.252804															13	147.6	4.13601	0	12	72.4595
YNL339W-B	12	376.1	5.04358	0	14	0.265709															15	251.1	6.30478	0	12	73.1717
YOR396C-A	12	376.1	5.10651	0	15	359.855															12	74.2	23.7818	1	12	73.1717
YOR396W	12	376.1	4.26016	0	15	358.197															15	251.1	5.18727	0	12	73.5088
YPL283W-B	12	376.1	4.71421	0	16	0.167673															12	74.2	21.3663	1	12	73.5088
YPR204C-A	12	376.1	4.28994	0	16	274.776															12	79	11.9371	1	12	73.785
YPR204W	12	376.1	3.98602	0	16	273.983															12	235	5.44015	0	12	76.288
YAR069C	13	9.6	8.08074	0	1	100.914															2	172.1	4.2092	0	12	77.1977
YAR070C	13	9.6	6.19772	0	1	101.165															12	64	7.05848	1	12	77.1977
YAR071W	13	9.6	11.0728	0	1	101.434															15	257.1	4.04343	0	12	79.9654
YBR028C	13	9.6	4.06552	0	2	88.8127															12	76	16.38	1	12	79.9654
YBR093C	13	9.6	13.7198	0	2	129.272															16	16.3	4.18311	0	12	81.0616
YBR133C	13	9.6	4.09502	0	2	151.313															12	231	12.0985	0	12	81.0616
YBR296C	13	9.6	9.46001	0	2	239.535															3	76.9	6.05139	0	12	82.6517
YCL024W	13	9.6	4.20502	0	3	37.9848															12	82	4.05889	1	12	82.5777
YCR045C	13	9.6	4.99012	0	3	100.629															12	235	6.55384	0	12	88.5974
YDR042C	13	9.6	4.36545	0	4	167.807															12	87	8.47549	1	12	89.4462
YDR281C	13	9.6	12.7145	0	4	316.902															10	41.4	4.29911	0	12	93.8166
YER072W	13	9.6	8.81486	0	5	106.009															14	158.6	4.72513	0	12	93.8166
YFL004W	13	9.6	5.77045	0	6	63.232															12	101	5.85165	1	12	95.1182
YGR233C	13	9.6	9.43522	0	7	354.557															14	248.6	4.45376	0	12	96.2042
YHR136C	13	9.6	12.0574	0	8	112.558															14	168	8.44731	0	12	97.481
YHR214C-D	13	9.6	5.09079	0	8	165.326															7	333.9	4.52077	0	12	98.6358
YHR214C-E	13	9.6	6.41821	0	8	165.493															14	168	9.66279	0	12	98.6358
YHR215W	13	9.6	11.2017	0	8	165.673															15	89.2	3.99295	0	12	101.412
YIL073C	13	9.6	4.44424	0	9	101.567															12	101	4.85383	1	12	101.412
YIR006C	13	9.6	4.48545	0	9	166.49															6	30.3	4.26607	0	12	101.713
YIR034C	13	9.6	6.35956	0	9	189.349															2	96.1	4.33261	0	12	101.713
YJL012C	13	9.6	8.07002	0	10	124.01															12	97.6	7.38398	1	12	101.713
YLL042C	13	9.6	4.09735	0	12	18.8892															1	48.7	4.15808	0	12	113.837
YLR174W	13	9.6	4.88534	0	12	181.664															14	168	5.73768	0	12	115.493
YML123C	13	9.6	12.7683	1	13	8.74543															12	127	6.12087	1	12	116.068
YOL055C	13	9.6	4.2105	0	15	74.5705															14	160.6	6.65079	0	12	116.068
YOR163W	13	9.6	5.73801	0	15	212.075															13	21.6	4.20128	0	12	116.517
YPL018W	13	9.6	8.00318	0	16	150.092															16	13.3	4.37358	0	12	116.517
YPL019C	13	9.6	6.40787	0	16	149.908															12	237	4.75615	0	12	116.517
YPL110C	13	9.6	5.54114	0	16	100.018															4	94.3	7.58629	0	12	116.517
YPL136W	13	9.6	4.15196	0	16	85.948															12	122	11.2867	1	12	117.855
YDR481C	13	10.6	7.59786	0	4	440.251															14	164.6	5.11378	0	12	118.567
YER078W-A	13	11.6	5.35492	0	5	111.549															14	154.6	4.97258	0	12	119.601
YLR137W	13	11.6	4.15309	0	12	150.096															12	231	10.8693	0	12	123.084
YPR167C	13	11.6	4.05363	0	16	254.507															14	182.6	5.20115	0	12	123.787
YGR156W	13	12.6	5.84753	0	7	296.189															14	163.6	4.52732	0	12	125.372
YNL251C	13	13.6	8.26203	0	14	64.505															12	142	9.04664	1	12	125.372
YOR033C	13	13.6	5.49261	0	15	130.175															14	164.6	18.7346	0	12	130.961
YER004W	13	14.6	4.18266	0	5	55.8895															14	168	4.10778	0	12	133.246
YGR010W	13	14.6	4.47985	0	7	189.315															12	135	5.08486	1	12	133.351
YMR061W	13	14.6	6.7698	0	13	133.508															14	166.6	4.20552	0	12	140.874
YOR366W	13	14.6	4.3467	0	15	338.337															10	195.9	5.54565	0	12	140.874
YDL154W	13	15.6	4.11457	0	4	55.259															7	339.9	4.06218	0	12	141.647
YDR019C	13	15.6	5.15775	0	4	150.483															12	204	4.25762	0	12	141.647
YHR183W	13	15.6	5.61184	0	8	141.284															14	168.6	5.72539	0	12	141.647
YLR268W	13	15.6	4.01445	0	12	244.838															7	294.9	4.63671	0	12	143.459
YML116W	13	15.6	5.06792	1	13	12.9673															10	124.4	4.962	0	12	145.446
YOR155C	13	15.6	4.63076	0	15	207.201															5	47.6	4.10937	0	12	146.438
YMR189W	13	16.6	6.75662	0	13	216.782															13	11.6	4.15309	0	12	150.096
YBR092C	13	17.6	5.26818	0	2	128.716															4	157.3	5.26076	0	12	153.034
YAL044C	13	18.6	4.8568	0	1	26.3117															11	157.6	6.81977	0	12	153.034
YBL106C	13	19.6	4.63413	0	2	4.13056															13	57.6	9.00527	0	12	153.034
YLR348C	13	19.6	4.51589	0	12	298.043															12	157.9	5.32789	1	12	155.487
YBR208C	13	20.6	5.74747	0	2	192.666															14	173.6	3.97377	0	12	156.43
YMR120C	13	20.6	9.4395	0	13	173.172															13	286.6	4.76004	0	12	156.43
YCR038W-A	13	21.6	5.39929	0	3	95.6761															12	157	5.82439	1	12	160.048
YER081W	13	21.6	4.52502	0	5	112.961															12	232	22.1148	0	12	161.09
YLR092W	13	21.6	4.20128	0	12	116.517															12	229	4.3001	0	12	161.357
YOL123W	13	21.6	5.29117	0	15	28.9938															12	172	22.4069	1	12	169.328
YBR222C	13	22.6	4.20374	0	2	200.523															12	170	22.1698	1	12	169.944
YAL044W-A	13	23.6	4.97748	0	1	25.886															12	172	22.5337	1	12	170.646
YML079W	13	23.6	4.42104	1	13	37.5065															12	170	22.0161	1	12	171.262
YML097C	13	23.6	8.50707	1	13	27.1066															12	171	22.8652	1	12	173.466
YNL104C	13	23.6	4.28984	0	14	157.9															12	172	22.7275	1	12	174.103
YLR438W	13	24.6	16.9823	0	12	364.492															12	170	22.3136	1	12	174.719
YML096W	13	24.6	6.5926	1	13	27.1812															12	172	22.1641	1	12	175.42
YER069W	13	27.6	4.4837	0	5	103.419															12	171	21.7288	1	12	176.037
YER061C	13	29.6	5.50492	0	5	97.8921															12	184	4.48571	1	12	177.8
YER068C-A	13	29.6	4.30605	0	5	103.532															12	173	12.019	1	12	178.296
YJL088W	13	30.6	5.43675	0	10	80.6073															14	168	6.98078	0	12	180.105
YLR437C-A	13	30.6	7.27639	0	12	364.559															12	166	4.67428	1	12	180.128
YPL111W	13	33.6	18.7592	0	16	98.6284															5	54.6	4.20487	0	12	180.787
YPL061W	13	34.6	5.53177	0	16	125.424															13	9.6	4.88534	0	12	181.664
YEL009C	13	42.6	6.23941	0	5	48.9658															12	177	7.69618	1	12	185.314
YML011C	13	42.6	4.35142	0	13	84.0908															15	57.1	4.35548	0	12	185.512
YML076C	13	44.6	12.2288	1	13	39.2412															7	290.9	12.3408	0	12	185.512
YNL187W	13	45.6	4.0744	0	14	106.545															14	175.6	9.13583	0	12	187.947
YHR112C	13	46.8	5.73406	0	8	100.699															8	20.3	5.3747	0	12	188.975
YMR184W	13	46.8	4.38695	0	13	213.61															2	33.1	4.14369	0	12	192.411
YDR320C	13	49.6	4.53472	0	4	343.514															8	35.3	4.17472	0	12	195.625
YHL009C	13	53.6	4.47373	0	8	25.531															12	221	5.59388	0	12	197.562
YNL037C	13	53.6	5.73071	0	14	206.932															14	165.6	5.54567	0	12	198.746
YML057W	13	54.6	6.05619	1	13	54.4716															12	233	22.3267	0	12	199.365
YLR142W	13	57.6	9.00527	0	12	153.034															3	137	5.1865	0	12	200.487
YML064C	13	57.6	4.44272	1	13	49.6182															14	168	4.49813	0	12	204.5
YBR125C	13	58.6	5.33661	0	2	146.532															5	57.6	4.61536	0	12	204.732
YCR005C	13	59.6	4.37883	0	3	58.7168															7	111.9	4.82125	0	12	207.696
YML043C	13	62.6	4.92077	1	13	65.1891															12	214	6.63579	1	12	211.156
YHR165C	13	67.6	4.06041	0	8	131.105															12	211	5.29363	1	12	213.158
YML030W	13	67.6	5.17618	1	13	73.5601															16	16.3	4.0482	0	12	216.898
YOR121C	13	72.8	4.86424	0	15	182.188															12	235	6.5188	1	12	216.898
YML042W	13	78.6	6.86328	1	13	65.5356															2	212.1	4.37236	0	12	217.656
YML012C-A	13	81.6	7.09173	1	13	83.5764															12	230	9.69054	1	12	218.57
YML016C	13	83.6	9.12181	1	13	82.0888															5	137.6	4.18577	0	12	219.526
YIL032C	13	86.6	3.99652	0	9	131.531															13	282	4.94343	0	12	220.364
YML007C-A	13	92.6	6.22379	1	13	86.0764															8	36.3	6.36823	0	12	220.364
YML002W	13	93.4	14.1672	1	13	89.9054															12	220	7.40479	1	12	220.453
YML003W	13	93.4	6.46941	1	13	89.5459															14	168	11.129	0	12	222.23
YMR006C	13	93.4	15.8692	1	13	95.0512															12	223	6.55072	1	12	223.363
YBR077C	13	98.6	4.04808	0	2	117.673															12	227	23.8467	1	12	225.466
YML015C	13	98.6	8.08435	1	13	82.5961															12	225.5	13.4939	1	12	225.681
YGL167C	13	103.6	4.77364	0	7	70.4846															12	229	5.30156	1	12	228.314
YOL011W	13	103.6	4.24831	0	15	100.757															14	212.6	4.3339	0	12	230.495
YMR023C	13	107.6	4.58483	1	13	109.109															14	169.6	14.0966	0	12	231.326
YOL152W	13	108.6	4.15422	0	15	13.4025															12	234	8.58099	1	12	232.522
YDR170W-A	13	110.6	5.92363	0	4	249.023															16	16.3	4.18599	0	12	232.688
YMR035W	13	112.6	7.84159	1	13	115.954															12	233	25.3503	1	12	232.688
YMR034C	13	114.7	6.00865	1	13	115.811															14	164.6	3.98033	0	12	237.151
YMR062C	13	123.6	4.31794	1	13	134.74															3	40.9	5.15442	0	12	239.372
YMR055C	13	126.6	5.10737	1	13	131.558															7	130.9	6.445	0	12	239.675
YOL012C	13	129.6	4.03367	0	15	100.306															12	235	9.62457	1	12	243.131
YMR057C	13	131.6	5.89761	1	13	132.139															13	15.6	4.01445	0	12	244.838
YMR058W	13	131.6	4.07377	1	13	132.17															5	119.6	4.14812	0	12	245.192
YMR048W	13	132.6	6.11758	1	13	124.742															4	425.4	4.21593	0	12	248.927
YMR059W	13	136.6	7.29829	1	13	132.945															12	233	4.6319	1	12	249.946
YOR055W	13	146.6	4.05858	0	15	141.707															12	245	7.84585	1	12	250.831
YLR028C	13	147.6	4.13601	0	12	72.4595															14	168	7.30933	0	12	253.428
YMR092C	13	148.6	4.25523	1	13	154.178															12	228	4.26069	0	12	253.766
YMR106C	13	161.6	6.59478	1	13	163.271															2	172.1	12.38	0	12	255.634
YMR119W-A	13	162.6	4.56428	1	13	172.395															12	264	4.52931	1	12	258.465
YER177W	13	163.6	5.5386	0	5	190.931															3	33.9	4.34535	0	12	259.711
YMR124W	13	166.6	5.32387	1	13	174.934															7	336.9	4.12461	0	12	259.928
YMR109W	13	168.6	4.08925	1	13	165.448															2	16.1	4.25531	0	12	260.655
YOL026C	13	168.6	4.41029	0	15	90.5318															12	264	14.4548	1	12	261.386
YJR055W	13	185.6	4.15768	0	10	161.621															12	227	7.55439	0	12	262.428
YER039C-A	13	190.6	4.14108	0	5	80.3328															14	159.6	4.30377	0	12	263.722
YER044C-A	13	196.6	4.19127	0	5	83.8843															14	166.6	8.47978	0	12	265.529
YMR150C	13	198.2	5.10825	1	13	191.264															14	168.6	7.15611	0	12	267.809
YMR152W	13	201.6	14.6931	1	13	191.456															16	11.3	6.35262	0	12	268.443
YMR183C	13	210.6	4.25557	1	13	213.48															2	62.1	3.98538	0	12	269.276
YOR107W	13	211.6	7.57073	0	15	172.067															12	263	5.67854	1	12	272.533
YMR180C	13	214.6	14.0478	1	13	211.914															5	135.6	7.77783	0	12	273.194
YMR199W	13	214.6	5.57966	1	13	225.322															14	168	11.1644	0	12	273.427
YMR182C	13	220.6	28.5547	1	13	212.58															12	268.3	7.29514	1	12	274.456
YMR232W	13	252.6	5.1421	1	13	250.523															13	296.6	4.09229	0	12	275.647
YMR247W-A	13	258.6	7.6959	1	13	261.509															4	31.3	4.2323	0	12	280.038
YMR246W	13	263.6	4.07794	1	13	258.288															11	153.6	4.24786	0	12	280.429
YAL037C-A	13	266.6	4.2009	0	1	33.1006															12	241	5.66366	0	12	281.588
YMR216C	13	266.6	4.18641	0	13	238.346															12	283	5.27319	1	12	283.122
YMR244C-A	13	267.6	11.0033	1	13	257.957															14	211.1	4.07238	0	12	289.561
YMR266W	13	270.6	24.5777	1	13	271.461															12	296	7.62976	1	12	291.597
YMR259C	13	274.6	4.85127	1	13	268.181															14	174.6	4.66505	0	12	293.796
YMR267W	13	274.6	4.83884	1	13	272.568															10	211.4	4.52241	0	12	296.139
YDR279W	13	276.6	4.8335	0	4	315.988															2	180.1	4.11201	0	12	298.043
YPL016W	13	276.6	4.03618	0	16	151.068															13	19.6	4.51589	0	12	298.043
YCR002C	13	282	4.57842	0	3	56.8049															12	284	4.03688	1	12	299.212
YGL223C	13	282	4.33964	0	7	29.7615															1	79.7	4.15796	0	12	307.487
YHR134W	13	282	4.73759	0	8	111.551															12	323	4.88586	1	12	313.889
YKR001C	13	282	4.10475	0	11	168.082															12	311.8	7.37955	1	12	313.837
YLR236C	13	282	4.94343	0	12	220.364															12	163	4.42785	0	12	315.804
YMR076C	13	282	4.38968	0	13	142.79															7	114.9	4.19269	0	12	316.718
YMR278W	13	282	8.01479	1	13	279.714															7	333.9	4.34345	0	12	318.523
YDR484W	13	282.6	4.25935	0	4	441.028															14	168	7.83945	0	12	318.523
YGL151W	13	282.6	4.10801	0	7	80.4849															12	318	6.1356	1	12	324.951
YJL207C	13	282.6	5.22013	0	10	14.2497															14	275.5	4.21202	0	12	325.333
[truncated: 977 more rows]

## Sheet: Combined EtOH Response
UID	peaks.chr	peaks.pos	peaks.lod	cis (+/- 20 cM)	trait.chr	trait.pos
YAL062W	1	12.7	5.20536	1	1	14.1844
YAL067C	1	12.7	5.60785	1	1	4.0329
YMR145C	1	12.7	4.65055	0	13	189.209
YNR014W	1	12.7	4.00141	0	14	241.443
YOR363C	1	12.7	8.76575	0	15	337.663
YOR364W	1	12.7	4.69362	0	15	337.716
YPR128C	1	12.7	4.17799	0	16	229.758
YOL147C	1	13.7	5.98699	0	15	16.0166
YAL049C	1	14.7	10.8625	1	1	23.6662
YMR210W	1	14.7	8.0776	0	13	233.759
YPL095C	1	14.7	6.66455	0	16	107.175
YMR209C	1	15.7	5.95714	0	13	233.68
YGL039W	1	16.7	4.14383	0	7	156.888
YDR170W-A	1	17.7	4.05123	0	4	249.023
YDR247W	1	17.7	5.80443	0	4	296.327
YIR033W	1	17.7	9.27988	0	9	187.273
YAL056W	1	18.7	15.0001	1	1	17.6528
YDR243C	1	18.7	18.0185	0	4	294.551
YOL101C	1	18.7	11.9002	0	15	42.221
YAL038W	1	19.7	4.00468	1	1	32.3197
YAR060C	1	19.7	9.86271	0	1	97.8486
YJL107C	1	19.7	4.12833	0	10	66.0063
YDR097C	1	22.7	4.83239	0	4	199.611
YGR037C	1	29.7	4.83048	0	7	207.223
YDR415C	1	33.7	4.41614	0	4	402.403
YBR011C	1	46.7	4.08831	0	2	77.3838
YPR029C	1	46.7	4.41753	0	16	181.813
YAL017W	1	49.7	10.9671	1	1	54.1017
YHR123W	1	50.7	4.3432	0	8	106.458
YKL015W	1	50.7	4.58415	0	11	155.119
YAL003W	1	58.7	9.71583	1	1	63.9622
YJL071W	1	65.7	4.52963	0	10	91.8268
YAR030C	1	78.7	8.38486	1	1	84.0615
YAR023C	1	79.7	14.7992	1	1	80.8982
YAR027W	1	79.7	19.7148	1	1	82.674
YAR035W	1	81.7	10.3971	1	1	85.5646
YAL063C	1	87.7	8.0602	0	1	12.5618
YAR050W	1	87.7	6.42994	1	1	91.5081
YBL093C	2	10.1	4.31408	1	2	13.4485
YCL040W	2	10.1	4.22488	0	3	24.3866
YCR106W	2	10.1	8.42925	0	3	149.243
YCR107W	2	10.1	6.03773	0	3	150.65
YER101C	2	14.1	4.55207	0	5	126.623
YDR491C	2	17.1	4.13527	0	4	444.808
YHR103W	2	24.1	4.27851	0	8	96.1124
YNL148C	2	24.1	3.96567	0	14	129.768
YLR174W	2	34.1	4.34148	0	12	181.664
YBL062W	2	35.1	4.36541	1	2	31.6026
YBL044W	2	39.1	9.65864	1	2	40.8262
YLR282C	2	41.1	4.76204	0	12	253.929
YBL043W	2	42.1	5.76886	1	2	41.0336
YBL015W	2	59.1	9.04791	1	2	58.2317
YDR170W-A	2	63.1	5.20403	0	4	249.023
YBR001C	2	64.9	4.88359	1	2	72.3687
YBR013C	2	74.1	10.2575	1	2	79.7597
YBR012C	2	75.1	11.2295	1	2	77.8619
YBR006W	2	84.9	4.63597	1	2	74.0898
YBR027C	2	91.1	5.03873	1	2	88.318
YBR026C	2	92.1	10.6684	1	2	88.2167
YBL005W	2	99.1	4.20267	0	2	65.2128
YLR112W	2	103.4	4.85501	0	12	133.495
YNL216W	2	103.4	4.19472	0	14	89.4032
YBL011W	2	105.1	5.39798	0	2	61.0464
YBR067C	2	105.1	3.97153	1	2	111.828
YGL158W	2	107.1	4.12309	0	7	76.6042
YBR054W	2	108.1	4.15903	1	2	102.968
YBR125C	2	112.1	4.47555	0	2	146.532
YBR072W	2	118.1	6.23856	1	2	114.606
YBR083W	2	118.1	4.65344	1	2	122.725
YBR106W	2	129.1	7.09035	1	2	135.796
YBR105C	2	135.1	4.04325	1	2	135.589
YBR111W-A	2	144.1	11.195	1	2	138.645
YBR119W	2	144.1	3.98282	1	2	143.815
YBR126W-B	2	146.1	7.56492	1	2	147.298
YBR126W-A	2	147.1	6.32297	1	2	147.275
YJR062C	2	154.1	4.11702	0	10	166.433
YLR455W	2	155.1	4.11268	0	12	379.309
YBL067C	2	156.1	4.06571	0	2	28.7698
YOR342C	2	162.1	4.42909	0	15	319.317
YGR067C	2	164.1	4.29472	0	7	231.144
YOR316C-A	2	165.1	10.0514	0	15	299.614
YPR106W	2	168.1	5.89044	0	16	214.653
YBR151W	2	169.1	14.4757	1	2	163.532
YBR158W	2	170.1	7.7233	1	2	166.977
YDL049C	2	170.1	4.82811	0	4	113.424
YFL021W	2	170.1	5.61145	0	6	46.0367
YMR007W	2	170.1	4.32902	0	13	95.1461
YNR067C	2	171.1	6.78836	0	14	280.846
YDL118W	2	172.1	6.16355	0	4	76.6619
YKL185W	2	172.1	6.5558	0	11	35.8895
YDL179W	2	173.1	4.49288	0	4	42.8557
YNL066W	2	173.1	11.1966	0	14	186.195
YBR197C	2	174.1	11.729	1	2	184.745
YBR174C	2	175.1	6.47053	1	2	174.78
YDR334W	2	175.1	4.12515	0	4	352.173
YLR122C	2	175.1	4.25288	0	12	140.874
YML052W	2	177.1	4.24298	0	13	57.9399
YBR203W	2	177.5	9.33703	1	2	188.746
YGR198W	2	177.5	4.09661	0	7	331.044
YHR178W	2	177.5	4.99856	0	8	137.791
YLR286W-A	2	177.5	5.17188	0	12	255.066
YLR398C	2	177.5	4.8443	0	12	330.823
YPR005C	2	177.5	4.05392	0	16	164.32
YBR166C	2	179.1	4.8109	1	2	171.357
YGR041W	2	179.1	5.8148	0	7	213.687
YBR196C-A	2	180.1	14.9194	1	2	184.24
YBR085C-A	2	181.1	7.45954	0	2	125.729
YDL006W	2	181.1	4.24383	0	4	136.388
YOR298C-A	2	181.1	5.45728	0	15	289.635
YPR054W	2	181.1	4.76096	0	16	193.219
YLR348C	2	182.1	4.81425	0	12	298.043
YBR175W	2	183.1	7.71811	1	2	174.707
YBR211C	2	183.1	5.11209	1	2	194.145
YJL078C	2	183.1	4.7547	0	10	88.1709
YBR196C-B	2	184.1	12.25	1	2	184.377
YER035W	2	184.1	4.45919	0	5	77.9369
YBR235W	2	188.1	4.06368	1	2	206.098
YBR237W	2	197.1	4.86009	1	2	207.621
YBR236C	2	201.1	4.67386	1	2	207.538
YBR098W	2	202.1	7.33793	0	2	132.447
YOR301W	2	204.1	4.55721	0	15	290.717
YBR233W	2	205.1	4.88593	1	2	205.054
YHL028W	2	213.1	4.52493	0	8	14.6163
YLR411W	2	215.4	4.18336	0	12	340.985
YBR246W	2	220.1	6.10837	1	2	213.518
YBR280C	2	233.8	4.96151	1	2	229.404
YCL049C	3	16.9	4.15616	1	3	19.5309
YBR285W	3	33.9	4.88926	0	2	232.161
YEL053W-A	3	36.9	4.02452	0	5	18.5019
YCL021W-A	3	41.9	26.7243	1	3	40.125
YCL026C-B	3	43.9	7.42728	1	3	35.4998
YCL016C	3	50.9	4.58003	1	3	45.9561
YCR019W	3	58.9	13.2409	1	3	73.3732
YCR040W	3	64.9	5.52434	0	3	96.2277
YCR020W-B	3	72.9	13.3866	1	3	74.566
YFL026W	3	72.9	5.64204	0	6	39.6108
YCR020C	3	74.8	23.2335	1	3	74.2485
YCR020C-A	3	74.8	5.56184	1	3	74.4584
YGL089C	3	74.8	5.49813	0	7	127.734
YJR004C	3	74.8	5.73238	0	10	133.478
YKL178C	3	74.8	5.94139	0	11	43.551
YKL209C	3	74.8	6.00837	0	11	17.6129
YPL187W	3	74.8	5.94276	0	16	56.1371
YIL015W	3	75.9	4.9379	0	9	145.079
YGL032C	3	76.9	4.01222	0	7	161.649
YFL027C	3	77.9	3.99689	0	6	39.2901
YCR097W-A	3	81.9	8.54795	0	3	141.314
YCL065W	3	83.9	6.04694	0	3	6.58306
YCL066W	3	83.9	5.26433	0	3	6.35794
YCR076C	3	118.9	4.48808	1	3	120.023
YCR098C	3	137	4.26858	1	3	143.314
YDR411C	3	137	4.02873	0	4	401.238
YER003C	3	137	3.96864	0	5	55.6848
YLR104W	3	137	4.39579	0	12	124.799
YML029W	3	137	4.36926	0	13	73.8751
YKL132C	4	9.3	4.5609	0	11	74.0298
YLR224W	4	13.3	4.05315	0	12	211.156
YER043C	4	15.3	5.09805	0	5	83.0074
YIL110W	4	15.3	4.22442	0	9	70.1979
YER049W	4	16.3	4.11493	0	5	88.1231
YBL004W	4	17.3	4.06118	0	2	68.2679
YBL016W	4	18.3	4.56439	0	2	57.7322
YBR204C	4	19.3	3.96488	0	2	190.012
YGR123C	4	19.3	4.18522	0	7	273.178
YBR115C	4	21.3	4.01112	0	2	142.188
YDL197C	4	27.7	4.37624	1	4	32.9963
YAL041W	4	34.3	4.58421	0	1	28.2858
YDR011W	4	36.3	4.15469	0	4	144.446
YMR145C	4	36.3	4.26918	0	13	189.209
YPR167C	4	38.3	4.29572	0	16	254.507
YDL168W	4	48.3	25.0652	1	4	49.4601
YKL001C	4	53.3	4.10808	0	11	166.816
YER092W	4	55.3	4.02967	0	5	120.007
YKL062W	4	56.3	4.51403	0	11	122.699
YDR096W	4	59.3	4.49703	0	4	197.531
YML091C	4	63.3	4.55906	0	13	30.8684
YDL132W	4	68.3	15.4815	1	4	69.5057
YDL124W	4	69.3	9.40266	1	4	74.4703
YJR127C	4	70.3	5.7934	0	10	198.923
YER028C	4	72.3	10.0995	0	5	74.168
YDL123W	4	78.3	4.86752	1	4	74.831
YDL109C	4	79.3	6.52138	1	4	82.8537
YDL101C	4	83.8	4.59814	1	4	87.3899
YDL092W	4	86.3	6.39101	1	4	90.7716
YPL014W	4	89.3	4.04445	0	16	152.964
YDL098C	4	90.3	5.61384	1	4	88.4159
YDL102W	4	90.3	4.87462	1	4	85.8507
YER169W	4	90.3	5.11988	0	5	183.161
YJR115W	4	90.3	4.21375	0	10	191.983
YJR126C	4	91.3	4.14476	0	10	197.615
YGL096W	4	92.3	3.98766	0	7	120.4
YPR149W	4	92.3	4.44336	0	16	240.672
YDL072C	4	93.3	5.04951	1	4	102.422
YPL250C	4	93.3	3.99359	0	16	21.626
YBL111C	4	94.3	4.08178	0	2	1.20149
YDR018C	4	94.3	4.29808	0	4	150.016
YEL075C	4	94.3	4.43416	0	5	1.98002
YGR067C	4	94.3	5.15809	0	7	231.144
YKL217W	4	95.3	4.04407	0	11	8.48783
YGR243W	4	96.3	5.05814	0	7	361.617
YDL079C	4	97.3	7.41887	1	4	97.3485
YDL076C	4	104.3	11.2094	1	4	99.6708
YLR408C	4	109.3	4.05015	0	12	336.302
YOR053W	4	110.3	5.23356	0	15	141.159
YNR073C	4	114.3	4.2918	0	14	287.21
YDL018C	4	122.3	4.82812	1	4	131.312
YDL037C	4	124.9	5.61146	1	4	119.551
YDL039C	4	124.9	7.14362	1	4	119.083
YDL022C-A	4	125.3	9.55762	1	4	127.147
YDL024C	4	125.3	7.68045	1	4	127.086
YNR003W-A	4	125.3	6.99461	0	14	234.764
YDL007C-A	4	133.3	5.2646	1	4	135.433
YDL008W	4	136.3	22.3998	1	4	134.403
YDL034W	4	136.3	4.22268	1	4	121.477
YDR006C	4	137.3	28.8598	1	4	142.996
YDL012C	4	141.7	9.8047	1	4	133.749
YDR001C	4	144.3	6.2926	1	4	140.277
YOR049C	4	145.3	4.38976	0	15	139.811
YDR009W	4	150.3	4.17388	1	4	143.675
YDR027C	4	152.3	4.50418	1	4	154.194
YGL158W	4	156.3	4.23671	0	7	76.6042
YDR036C	4	158.3	15.7704	1	4	162.698
YLR092W	4	159.3	4.05005	0	12	116.517
YDR038C	4	160.3	7.00356	1	4	164.556
YDR039C	4	161.3	10.5894	1	4	165.762
YJR137C	4	161.3	4.2906	0	10	204.977
YLR303W	4	161.3	4.36934	0	12	263.722
YIL074C	4	162.3	6.22374	0	9	100.072
YHL036W	4	163.3	5.03784	0	8	7.8444
YIR017C	4	163.3	4.4292	0	9	172.879
YJL060W	4	163.3	5.28051	0	10	97.0181
YJL101C	4	165.3	4.171	0	10	70.8971
YDR037W	4	166	4.32902	1	4	162.924
YDR041W	4	166	9.29931	1	4	167.375
YKL068W-A	4	166	4.34752	0	11	117.366
YKR069W	4	167.3	4.87525	0	11	217.031
YJR151C	4	171.3	4.14324	0	10	214.693
YDR058C	4	179.3	14.9566	1	4	176.295
YDR075W	4	185.3	12.16	1	4	185.105
YDR076W	4	190.3	4.09073	1	4	185.513
YJL026C-A	4	198.7	4.19537	0	10	117.971
YDR097C	4	208.3	19.6123	1	4	199.611
YDR135C	4	231.3	5.21153	1	4	225.568
YDR151C	4	242.3	5.18332	1	4	237.228
YDR143C	4	243.3	4.99298	1	4	230.629
YDR160W	4	246.3	4.44922	1	4	240.641
YHR084W	4	247.3	7.20109	0	8	82.2137
YDR197W	4	251.3	4.63719	1	4	263.881
YHR013C	4	252.3	4.73617	0	8	39.4215
YBR202W	4	253.3	4.04333	0	2	187.726
YDR170C	4	260.3	7.36265	1	4	248.722
YHR017W	4	260.3	4.04216	0	8	41.5903
YHR083W	4	260.3	4.83222	0	8	81.7509
YNL037C	4	262.3	4.11422	0	14	206.932
YPL200W	4	263.3	4.18065	0	16	49.7208
YKR090W	4	264.3	3.96862	0	11	231.251
YBR047W	4	265.3	4.07265	0	2	99.5814
YPR002W	4	265.3	4.47384	0	16	161.916
YML130C	4	266.3	3.99298	0	13	4.45185
YOR191W	4	268.3	4.37748	0	15	228.526
YPR035W	4	269.3	4.47013	0	16	186.235
YGR219W	4	275.3	4.23733	0	7	346.372
YDR213W	4	282.3	6.24081	1	4	275.782
YGR110W	4	303.3	5.01278	0	7	264.09
YDR272W	4	307.3	7.65219	1	4	312.778
YDR275W	4	307.3	8.31433	1	4	313.784
YDR263C	4	308.3	11.0035	1	4	308.595
YGL251C	4	316.3	5.04737	0	7	11.614
YDR262W	4	317.3	9.82144	1	4	307.85
YIR017W-A	4	320.3	5.05539	0	9	172.631
YBR302C	4	326.3	5.51404	0	2	243.422
YKR009C	4	331.6	4.03504	0	11	173.521
YDR297W	4	339.3	4.55204	1	4	327.491
YDR320C	4	339.3	4.46397	1	4	343.514
YML034C-A	4	339.3	4.24016	0	13	71.3166
YDR319C	4	340.3	5.26302	1	4	342.806
YDR329C	4	351.3	4.05502	1	4	349.583
YDR366C	4	364.3	4.4146	1	4	375.973
YDR368W	4	366.3	5.47486	1	4	376.305
YDR367W	4	368.3	25.5416	1	4	375.977
YDR238C	4	368.7	4.3962	0	4	291.615
YDR365C	4	368.7	10.3792	1	4	373.972
YKL073W	4	375.3	4.17276	0	11	112.507
YCR106W	4	379.3	4.29045	0	3	149.243
YIL116W	4	392.3	4.33679	0	9	64.2925
YDR024W	4	402.3	4.23257	0	4	152.238
YDR441C	4	414.3	11.5891	1	4	416.956
YBL032W	4	424.3	5.2814	0	2	48.0864
YDR452W	4	425.3	8.31387	1	4	422.496
YDR458C	4	425.4	8.68588	1	4	428.439
YDR461C-A	4	425.4	5.85824	1	4	429.589
YDR463W	4	425.4	6.15268	1	4	429.914
YDR476C	4	425.4	5.39073	1	4	437.43
YDR478W	4	425.4	4.51422	1	4	438.496
YOR248W	4	425.4	4.60303	0	15	263.366
YJL079C	4	431.3	4.83162	0	10	87.206
YJR065C	4	431.3	4.09318	0	10	167.722
YAR035C-A	4	432.3	4.01157	0	1	86.5655
YOL119C	4	432.3	4.0007	0	15	31.8048
YDR477W	4	433.3	4.92031	1	4	437.815
YGR120C	4	438.3	4.20409	0	7	270.442
YPR138C	4	442.3	4.14426	0	16	235.624
YDR488C	4	443.3	4.79802	1	4	443.509
YNR003C	4	444.3	4.20534	0	14	235.09
YDR508C	4	446.2	4.23947	1	4	455.187
YPR177C	4	446.2	4.01269	0	16	258.89
YDR523C	4	447.3	5.98405	1	4	460.959
YDR501W	4	448.3	7.68724	1	4	449.881
YDR520C	4	452.3	4.52649	1	4	459.83
YDR524C	4	455.3	7.03834	1	4	461.564
YDR541C	4	464.6	6.84034	1	4	471.396
YMR247W-A	4	464.6	4.35686	0	13	261.509
YEL057C	5	11.6	12.8722	1	5	15.9851
YEL073C	5	20.6	4.17117	1	5	2.62398
YNR073C	5	20.6	4.67509	0	14	287.21
YGL112C	5	25.6	4.09924	0	7	110.921
YIL103W	5	27.6	3.99644	0	9	77.2589
YNL035C	5	29.4	3.98679	0	14	210.756
YER111C	5	32.6	5.63285	0	5	135.059
YDR055W	5	33.6	5.43559	0	4	174.698
YEL038W	5	33.6	10.1645	1	5	28.1509
YAL054C	5	34.6	7.40317	0	1	20.2514
YGL121C	5	34.6	4.95339	0	7	104.046
YKL163W	5	34.6	4.03543	0	11	54.884
YNL018C	5	34.6	9.51473	0	14	222.649
YPL147W	5	34.6	5.32026	0	16	79.2517
YEL052W	5	35.6	4.99125	1	5	19.7846
YMR185W	5	35.6	5.59276	0	13	213.894
YNL034W	5	35.6	11.4146	0	14	211.037
YOL126C	5	35.6	17.9296	0	15	27.366
YGL205W	5	36.6	4.37315	0	7	40.0562
YEL021W	5	37.6	16.5227	1	5	40.6823
YER075C	5	37.6	4.75433	0	5	108.947
YNL137C	5	37.6	4.56116	0	14	136.913
YOL143C	5	37.6	23.2378	0	15	18.1558
YHR102W	5	38.6	4.61916	0	8	94.9569
YLR420W	5	38.6	19.5152	0	12	346.941
YLR460C	5	38.6	4.20694	0	12	381.922
YML130C	5	38.6	4.83446	0	13	4.45185
YCR005C	5	40.6	4.97219	0	3	58.7168
YKL216W	5	40.6	5.87746	0	11	9.62085
YDL022W	5	41.6	4.96247	0	4	127.695
YDR344C	5	42.6	4.88896	0	4	360.371
YIL155C	5	42.6	4.46528	0	9	24.1439
YIL160C	5	42.6	5.04185	0	9	18.6309
YPR026W	5	42.6	5.12705	0	16	178.451
YDR123C	5	43.6	4.27656	0	4	216.86
YKR056W	5	43.6	5.15489	0	11	208.61
YNR018W	5	43.6	4.06184	0	14	245.806
YER088C	5	44.6	4.34827	0	5	117.328
YJR046W	5	47.6	5.03388	0	10	156.615
YEL044W	5	49.3	5.93466	0	5	24.4022
YNR027W	5	49.3	4.09393	0	14	249.742
YOR262W	5	50.6	4.31044	0	15	269.731
YEL020C	5	51.6	5.31463	1	5	42.1328
YPL265W	5	53.6	4.70141	0	16	11.8805
YHL038C	5	54.6	5.55804	0	8	7.6244
YJR113C	5	54.6	4.43955	0	10	191.692
YGL036W	5	57.6	4.69541	0	7	158.604
YGR043C	5	59.6	4.20295	0	7	215.144
YDL085W	5	60.6	4.5788	0	4	93.9977
YKR009C	5	61.6	4.08875	0	11	173.521
YMR175W	5	61.6	4.01551	0	13	207.758
YMR323W	5	61.6	4.09036	0	13	312.855
YML042W	5	63.6	5.97758	0	13	65.5356
YDL035C	5	64.6	4.33051	0	4	121.562
YOR009W	5	64.6	4.46404	0	15	113.618
YEL070W	5	65.6	4.20642	0	5	6.83633
YNL012W	5	65.6	4.14724	0	14	225.585
YFL013W-A	5	67.6	4.66623	0	6	51.7124
YER044C	5	71.6	7.77466	1	5	83.3215
YGR155W	5	88.6	4.34637	0	7	295.45
YER053C-A	5	90.6	5.96351	1	5	91.386
YER048W-A	5	93.6	6.32023	1	5	87.7694
YER036C	5	94.6	8.48273	1	5	78.8334
YML003W	5	94.6	5.32209	0	13	89.5459
YER065C	5	95.6	5.28014	1	5	100.444
YBL088C	5	97.6	5.36742	0	2	17.7965
YDR222W	5	98.6	4.15452	0	4	282.077
YER073W	5	98.6	6.16207	1	5	106.438
YHR089C	5	98.6	4.65446	0	8	84.9488
YKR057W	5	99.6	5.46581	0	11	209.449
YER049W	5	100.6	4.51362	1	5	88.1231
YGR159C	5	100.6	4.26165	0	7	298.814
YPL093W	5	100.6	4.40031	0	16	107.62
YPR074C	5	100.6	4.32731	0	16	201.513
YER165W	5	101.6	4.24173	0	5	178.62
YHR085W	5	101.6	4.25561	0	8	82.9885
YJR070C	5	101.6	4.03264	0	10	171.146
YER070W	5	102.6	9.92747	1	5	104.659
YER131W	5	102.6	4.35934	0	5	148.431
YLR196W	5	102.6	4.00603	0	12	195.864
YNL067W	5	102.6	3.9835	0	14	185.493
YOL124C	5	102.6	4.54798	0	15	28.635
YLR197W	5	103.6	4.15441	0	12	196.632
YLR344W	5	103.6	4.30374	0	12	294.956
YLR406C	5	103.6	4.72968	0	12	335.256
YDR120C	5	104.6	4.13129	0	4	214.936
YHL033C	5	104.6	4.00511	0	8	10.7858
YLR029C	5	104.6	4.02078	0	12	72.9193
YML026C	5	104.6	4.29454	0	13	75.9198
YMR142C	5	106.6	5.21997	0	13	187.284
YMR229C	5	106.6	4.27405	0	13	248.554
YDL082W	5	107.6	4.13361	0	4	95.6102
YOR206W	5	107.6	4.4523	0	15	240.09
YEL016C	5	108.8	4.05544	0	5	44.2107
YER076C	5	108.8	6.26925	1	5	109.751
YLR333C	5	109.6	4.70284	0	12	286.523
YOL021C	5	109.6	4.26338	0	15	94.1847
YPL061W	5	109.6	5.79039	0	16	125.424
YPL126W	5	109.6	4.69349	0	16	89.9965
YDR361C	5	111.6	5.38437	0	4	370.832
YDR447C	5	112.6	4.24472	0	4	420.119
YGR158C	5	112.6	4.94759	0	7	298.21
YML113W	5	112.6	4.08961	0	13	14.9604
YBR104W	5	113.6	4.70939	0	2	134.897
YIL158W	5	113.6	4.95349	0	9	20.7693
YLR448W	5	113.6	4.21763	0	12	370.384
YMR290C	5	113.6	5.14832	0	13	289.535
YDR347W	5	114.6	5.06035	0	4	362.452
YGL076C	5	114.6	4.03915	0	7	135.063
YLR293C	5	114.6	4.23278	0	12	259.711
YEL046C	5	115.6	4.29444	0	5	24.0642
YLR185W	5	115.6	4.29615	0	12	188.181
YLR191W	5	115.6	4.87565	0	12	193.45
YPL207W	5	115.6	4.13904	0	16	46.37
YPR133W-A	5	115.6	4.61998	0	16	231.309
YDR492W	5	116.6	4.40416	0	4	444.787
YER096W	5	116.6	4.79055	1	5	123.096
YGR079W	5	116.6	6.31339	0	7	237.033
YML081C-A	5	116.6	4.07554	0	13	35.4367
YNL247W	5	116.6	4.51838	0	14	67.6689
YJL158C	5	117.6	4.26905	0	10	36.903
YJR121W	5	117.6	4.14841	0	10	194.29
YMR108W	5	117.6	5.56737	0	13	164.596
YBR084W	5	118.6	4.92439	0	2	123.292
YNL009W	5	118.6	4.71763	0	14	227.491
YBL009W	5	119.6	4.71374	0	2	62.1393
YBL015W	5	119.6	4.33376	0	2	58.2317
YBL030C	5	119.6	4.81613	0	2	49.2263
YHR094C	5	119.6	4.13249	0	8	87.7544
YJR077C	5	119.6	4.50653	0	10	173.418
YKL189W	5	119.6	4.44953	0	11	32.172
YER090W	5	120.6	4.34827	1	5	118.293
YKL211C	5	120.6	6.16374	0	11	14.527
YNR009W	5	120.6	5.71023	0	14	237.831
YER089C	5	121.6	6.29988	1	5	118.08
YFL015C	5	121.6	6.77751	0	6	51.3114
YJL116C	5	121.6	3.98156	0	10	58.48
YKL110C	5	121.6	6.68364	0	11	87.1957
YML031W	5	121.6	3.99405	0	13	72.7969
YML131W	5	121.6	5.64608	0	13	3.43984
YNR040W	5	121.6	4.27431	0	14	258.894
YBR085W	5	122.6	4.92267	0	2	124.773
YDL039C	5	122.6	7.70195	0	4	119.083
YER001W	5	122.6	4.84272	0	5	53.7727
YFR015C	5	122.6	3.9751	0	6	84.6301
YDL076C	5	123.6	3.96551	0	4	99.6708
YMR016C	5	123.6	4.86632	0	13	103.864
YER107C	5	125.6	9.82386	1	5	131.08
YMR135C	5	125.6	3.98482	0	13	183.637
YER014W	5	126.6	4.30363	0	5	63.9308
YER115C	5	126.6	6.43153	1	5	138.217
YHR139C	5	126.6	6.78201	0	8	113.791
YER098W	5	127.6	7.57289	1	5	124.413
YER109C	5	127.6	5.86271	1	5	132.158
YIL013C	5	127.6	5.58835	0	9	149.637
YFL051C	5	129.6	9.35676	0	6	14.6281
YBR230C	5	130.6	5.57864	0	2	204.006
YDR046C	5	130.6	4.89734	0	4	170.7
YMR136W	5	130.6	5.52119	0	13	184.025
YER097W	5	130.7	7.07249	1	5	124.299
YER104W	5	130.7	4.95924	1	5	128.373
YIR019C	5	130.7	6.41853	0	9	177.175
YNL234W	5	130.7	7.65315	0	14	77.7808
YPR015C	5	130.7	5.13701	0	16	171.386
YER114C	5	131.6	9.02209	1	5	137.811
YGL208W	5	131.6	5.3717	0	7	36.0537
YNL104C	5	132.6	5.82751	0	14	157.9
YHR211W	5	133.6	4.23841	0	8	157.658
YAR050W	5	134.6	5.51209	0	1	91.5081
YDR186C	5	134.6	5.73303	0	4	259.023
YNL195C	5	134.6	6.51082	0	14	100.717
YPR013C	5	134.6	11.4393	0	16	169.808
YBR201C-A	5	135.6	4.69841	0	2	187.403
YMR107W	5	135.6	6.79727	0	13	164.232
YKR102W	5	137.6	5.16517	0	11	245.489
YMR178W	5	137.6	4.82816	0	13	210.301
YDR221W	5	138.6	4.02923	0	4	281.232
YER123W	5	138.6	7.05808	1	5	141.71
YMR034C	5	138.6	4.06922	0	13	115.811
YOR044W	5	138.6	4.8955	0	15	136.272
YBR285W	5	139.6	4.09077	0	2	232.161
YER004W	5	139.6	5.545	0	5	55.8895
YER017C	5	140.6	4.19937	0	5	67.1403
YER135C	5	142.6	8.26383	1	5	153.459
YML013W	5	142.6	4.07498	0	13	82.9767
YGL126W	5	144.6	4.75292	0	7	100.284
YMR214W	5	144.6	4.19755	0	13	236.416
YER132C	5	148.5	7.47168	1	5	150.701
YER139C	5	148.5	6.79715	1	5	157.964
YER153C	5	149.6	5.13399	1	5	166.195
YER152C	5	150.6	9.03886	1	5	165.909
YPR059C	5	152.6	4.2267	0	16	195.661
YER150W	5	158.6	8.57427	1	5	163.947
YHR132W-A	5	160.6	3.9748	0	8	111.041
YER158C	5	164.6	5.74017	1	5	171.705
YMR298W	5	164.6	4.18318	0	13	293.701
YER186C	5	187.6	5.36983	1	5	196.886
YER188W	5	189.6	15.575	1	5	198.781
YDR362C	5	190.9	4.40773	0	4	371.587
YER180C	5	190.9	7.25538	1	5	192.652
YCL075W	6	19.3	5.04606	0	3	1.00298
YFL056C	6	22.3	4.01349	1	6	7.37203
YHR213W-B	6	25.3	5.34201	0	8	162.282
YAR064W	6	29.3	5.88312	0	1	99.0664
YFL052W	6	31.3	8.14964	1	6	13.5197
YHR213W-A	6	31.3	8.23306	0	8	162.207
YFL050C	6	33.3	4.32944	1	6	17.1773
YIL014W	6	37.3	4.27958	0	9	146.776
YFL024C	6	40.3	5.41852	1	6	43.3383
YCR032W	6	43.3	4.2287	0	3	86.1833
YFL027C	6	43.3	4.43784	1	6	39.2901
YFL017W-A	6	47.4	5.79279	1	6	49.7455
YDR170C	6	58.3	4.23115	0	4	248.722
YDR033W	6	59.3	4.10555	0	4	157.556
YDR260C	6	63.3	3.97335	0	4	302.913
YFL025C	6	68.3	4.35624	0	6	41.8449
YGR131W	6	71.3	4.08988	0	7	279.277
YKR104W	6	73.3	4.83059	0	11	249.471
YFL003C	6	75.3	5.75413	1	6	65.7972
YDL076C	6	77.3	4.60704	0	4	99.6708
YFL007W	6	77.3	4.14023	1	6	59.2353
YFR013W	6	79.8	4.74589	1	6	81.5189
YFL001W	6	81.3	10.7393	1	6	70.5822
YEL050C	6	92.3	4.83	0	5	21.2834
YER017C	6	104.3	5.15866	0	5	67.1403
YFR055W	6	104.3	9.75025	0	6	126.839
YFR036W	6	106.3	8.18888	1	6	108.95
YFR025C	6	110.3	4.13592	1	6	98.2672
YHR024C	6	111.8	4.13689	0	8	47.7248
YGL248W	7	9.9	5.37835	1	7	13.1814
YGL226W	7	16.9	7.89039	1	7	27.1564
YGL237C	7	19.9	6.44618	1	7	19.81
YDL218W	7	20.9	4.5658	0	4	20.5853
YGL224C	7	25.9	4.10016	1	7	29.2023
YIL139C	7	26.9	4.13686	0	9	39.8812
YGL211W	7	27.9	4.78567	1	7	34.2677
YGL221C	7	28.9	4.24016	1	7	30.476
YGL208W	7	34.6	7.18777	1	7	36.0537
YKL171W	7	34.6	5.32062	0	11	48.4414
YLR347W-A	7	34.6	4.20835	0	12	296.931
YBR150C	7	48.9	4.43435	0	2	163.372
YKL162C-A	7	52.9	4.12882	0	11	55.5208
YGL186C	7	54.8	5.84567	1	7	56.5593
YGL158W	7	60.9	7.29701	1	7	76.6042
YKL032C	7	60.9	4.04573	0	11	144.992
YGL179C	7	63.9	4.3182	1	7	61.1091
YGL163C	7	72.9	4.37516	1	7	72.6773
YMR117C	7	90.9	4.29532	0	13	170.657
YHR052W	7	100	4.20051	0	8	63.258
YML116W-A	7	103.9	4.32188	0	13	12.7206
YML117W	7	103.9	7.00437	0	13	11.6203
YER020W	7	105.9	4.06837	0	5	68.321
YGL130W	7	105.9	4.14498	1	7	98.4871
YDR454C	7	109.9	4.24294	0	4	423.724
YPL059W	7	112.9	4.0539	0	16	128.889
YGL112C	7	114.9	4.11692	1	7	110.921
YEL041W	7	119.9	4.12172	0	5	26.5688
YKL046C	7	126.9	4.16991	0	11	133.876
YBL075C	7	127.9	5.73575	0	2	25.933
YGL062W	7	129.9	4.32367	1	7	142.547
YGL093W	7	130.9	11.7919	1	7	123.936
YGL094C	7	131.9	6.31015	1	7	123.78
YGL083W	7	132.9	7.03319	1	7	130.658
YHR072W-A	7	132.9	4.03057	0	8	72.4885
YLR260W	7	132.9	4.39864	0	12	239.675
YGL067W	7	133.9	6.86398	1	7	139.183
YBR106W	7	134.9	4.22819	0	2	135.796
YGL066W	7	135.9	6.39211	1	7	139.74
YIL009C-A	7	136.9	4.54873	0	9	151.213
YGL053W	7	138.9	10.233	1	7	148.981
YKR057W	7	139.9	4.35892	0	11	209.449
YKL182W	7	141.9	4.03901	0	11	38.2388
YGL060W	7	142.9	9.88484	1	7	144.349
YGL052W	7	147.9	6.70358	1	7	149.295
YLR205C	7	147.9	4.25228	0	12	199.365
YPL074W	7	149.9	5.18401	0	16	120.565
YGL035C	7	157.9	14.767	1	7	160.255
YHR035W	7	169.5	5.67736	0	8	53.4394
YGL017W	7	169.9	4.73883	1	7	170.166
YKL047W	7	187.9	4.26635	0	11	132.674
YGL006W	7	195.9	4.74606	1	7	179.823
YGR015C	7	195.9	4.16449	1	7	193.209
YGR032W	7	203.9	5.46782	1	7	202.888
YBR260C	7	204.9	4.40943	0	2	220.418
YGR045C	7	210.9	5.61225	1	7	216.2
YGR039W	7	215.9	22.3259	1	7	212.727
YGR065C	7	234.5	8.51045	1	7	229.325
YGR063C	7	234.9	4.75508	1	7	228.574
YGR111W	7	236.9	4.6127	0	7	264.876
YGR110W	7	259.9	12.418	1	7	264.09
YAR027W	7	263.9	4.7451	0	1	82.674
YGR080W	7	272.9	4.03214	0	7	237.511
YGR126W	7	275.9	4.05712	1	7	275.995
YBR213W	7	279.9	5.54106	0	2	195.118
YGR131W	7	279.9	5.73118	1	7	279.277
YKL201C	7	279.9	5.91617	0	11	25.637
YLR303W	7	279.9	4.01449	0	12	263.722
YGR055W	7	280.9	5.02397	0	7	221.78
YGR100W	7	281.9	4.70189	0	7	255.38
YIR017C	7	282.9	4.4848	0	9	172.879
YKL068W-A	7	282.9	7.77885	0	11	117.366
YNL276C	7	282.9	4.62344	0	14	43.9947
YDL059C	7	283.9	11.6449	0	4	106.922
YIL046W	7	283.9	4.53341	0	9	120.862
YBR294W	7	284.9	6.26703	0	2	236.749
YKR069W	7	284.9	9.09522	0	11	217.031
YLR092W	7	284.9	8.63849	0	12	116.517
YOR100C	7	284.9	4.10846	0	15	169.738
YDR253C	7	285.9	7.04705	0	4	298.982
YER092W	7	285.9	5.18503	0	5	120.007
YJL060W	7	285.9	8.52778	0	10	97.0181
YIL074C	7	286.9	5.38102	0	9	100.072
YPR167C	7	286.9	12.359	0	16	254.507
YOL102C	7	287.9	4.47531	0	15	41.8147
YFR030W	7	288.9	9.37077	0	6	102.385
YGR144W	7	288.9	9.44452	1	7	288.753
YJR137C	7	288.9	8.52458	0	10	204.977
YEL072W	7	289.9	5.29444	0	5	4.7823
YJL101C	7	289.9	7.77231	0	10	70.8971
YLR364W	7	290.9	5.42439	0	12	307.487
YNL277W	7	290.9	8.93701	0	14	43.4488
YJL212C	7	291.9	6.4293	0	10	10.9028
YJR010W	7	291.9	10.4834	0	10	136.902
YKL001C	7	291.9	12.5519	0	11	166.816
YLR180W	7	292.9	6.65282	0	12	185.512
YDR046C	7	294.9	4.21545	0	4	170.7
YLL062C	7	296.9	5.29183	0	12	6.29835
YBR005W	7	299.2	4.01645	0	2	73.758
YCL030C	7	299.2	4.46318	0	3	32.7858
YDR379C-A	7	299.2	3.98046	0	4	382.389
YGR161C	7	299.2	4.98679	1	7	299.465
YHR015W	7	299.2	4.03519	0	8	40.3513
YLR121C	7	299.2	5.08734	0	12	140.493
YMR009W	7	299.2	6.82126	0	13	96.5545
YPL222C-A	7	299.2	4.44526	0	16	38.2931
YGR066C	7	302.9	4.15095	0	7	230.041
YGR161W-C	7	305.9	6.03478	1	7	299.764
YAL060W	7	308.9	4.63324	0	1	15.8023
YEL070W	7	309.9	5.56977	0	5	6.83633
YGR173W	7	310.9	6.13326	1	7	312.214
YNR073C	7	311.9	4.18665	0	14	287.21
YKR032W	7	318.9	4.53493	0	11	192.3
YGR198W	7	324.6	4.57965	1	7	331.044
YNL077W	7	326.9	4.10755	0	14	178.491
YGR201C	7	331.9	8.98999	1	7	334.197
YBL101C	7	332.9	4.48197	0	2	8.45681
YGL036W	7	334.9	4.1801	0	7	158.604
YMR170C	7	335.9	4.51725	0	13	205.054
YAL028W	7	337.9	4.44691	0	1	41.8266
YGR103W	7	337.9	4.11834	0	7	257.299
YNL110C	7	338.9	4.19831	0	14	154.834
YHR134W	7	339.9	4.08338	0	8	111.551
YDR375C	7	346.7	4.24417	0	4	380.223
YGR221C	7	348.9	5.42623	1	7	347.464
YGR212W	7	350.9	7.48819	1	7	339.33
YMR260C	7	352.9	4.60777	0	13	268.506
YFR001W	7	355.9	4.32234	0	6	71.5316
YGR232W	7	355.9	5.93317	1	7	352.989
YDL213C	7	356.9	4.32459	0	4	24.1467
YJL070C	7	357.9	5.12991	0	10	93.1822
YDR436W	7	358.9	4.5776	0	4	413.771
YER002W	7	358.9	4.1922	0	5	54.9195
YGR229C	7	358.9	5.32347	1	7	351.859
YKL082C	7	358.9	4.54484	0	11	107.143
YKL172W	7	358.9	4.38013	0	11	47.7882
YDL099W	7	359.9	4.07183	0	4	87.8758
YER029C	7	359.9	4.48376	0	5	74.6236
YDR429C	7	360.9	4.97367	0	4	410.811
YNL136W	7	361.9	3.99573	0	14	137.028
YLR051C	7	362.9	4.70048	0	12	88.9237
YDL065C	7	363.9	4.39567	0	4	104.536
YJL115W	7	363.9	4.8044	0	10	58.9031
YOR216C	7	363.9	4.35308	0	15	247.176
YIL116W	7	364.9	4.01722	0	9	64.2925
YPR018W	7	364.9	5.35467	0	16	172.387
YDR176W	7	365.9	4.49617	0	4	252.514
YJL206C	7	365.9	4.54063	0	10	14.9985
YLR240W	7	366.9	4.70169	0	12	222.308
YOR078W	7	366.9	4.34734	0	15	155.994
YLR045C	7	367.9	4.01509	0	12	85.5798
YLR438C-A	7	368.9	6.21161	0	12	365.097
YGR246C	7	369.9	4.00632	1	7	364.177
YER161C	7	371.9	3.97978	0	5	175.118
YDR026C	7	372.9	4.08608	0	4	153.247
YGR072W	7	372.9	4.29148	0	7	234.657
YKL041W	7	372.9	4.12912	0	11	136.735
YNL050C	7	372.9	4.84706	0	14	198.3
YDR435C	7	373.9	3.96192	0	4	413.506
YPL255W	7	373.9	4.64172	0	16	19.602
YAL034W-A	7	374.9	4.06212	0	1	35.8963
YGR280C	7	374.9	4.12198	1	7	389.129
YJR014W	7	375.9	4.14386	0	10	138.584
YFL046W	7	377.9	6.01253	0	6	20.5227
YOL118C	7	380.9	4.02388	0	15	31.988
YNL297C	7	381.9	4.64528	0	14	28.3674
YBR299W	7	383.9	4.10834	0	2	241.584
YCL026C-B	7	383.9	4.56002	0	3	35.4998
YGR286C	7	386.9	7.85635	1	7	394.019
YFL062W	7	388.9	5.02917	0	6	3.04738
YGR271W	7	388.9	5.21529	1	7	381.751
YGR289C	7	389.9	4.32653	1	7	398.042
YDR039C	7	391.5	4.99515	0	4	165.762
YER180C	7	391.5	4.0826	0	5	192.652
YGR279C	7	391.5	5.10655	1	7	388.475
YGR290W	7	391.5	16.3212	1	7	397.919
YGR295C	7	391.5	16.8294	1	7	400.601
YMR007W	7	391.5	4.89587	0	13	95.1461
YNL336W	7	391.5	5.50415	0	14	3.07608
YDL051W	8	8.3	4.59029	0	4	112.827
YDR161W	8	8.3	4.8434	0	4	241.534
YHL037C	8	8.3	6.37826	1	8	7.82579
YHL048W	8	8.3	11.3005	1	8	1.89002
YIR043C	8	8.3	5.33147	0	9	197
YIR044C	8	8.3	13.5125	0	9	197.2
YNL002C	8	8.3	4.50628	0	14	232.064
YOR004W	8	8.3	4.93283	0	15	110.074
YOR380W	8	8.3	4.63187	0	15	346.915
YPL092W	8	8.3	7.48957	0	16	108.436
YDR120C	8	9.3	4.26242	0	4	214.936
YJL125C	8	9.3	5.5015	0	10	56.0266
YGL111W	8	10.3	4.94703	0	7	111.013
YGR103W	8	10.3	4.73698	0	7	257.299
YHR088W	8	10.3	4.35578	0	8	84.4065
YMR049C	8	10.3	3.99665	0	13	125.945
YOR340C	8	10.3	4.14853	0	15	316.858
YPR163C	8	10.3	4.68619	0	16	252.272
YDL148C	8	11.3	4.0176	0	4	59.0522
YGR245C	8	11.3	4.21364	0	7	363.364
YHL031C	8	11.3	4.44148	1	8	11.8266
YIL008W	8	11.3	4.41133	0	9	154.184
YJL122W	8	11.3	4.03618	0	10	56.9361
YLR002C	8	11.3	5.39233	0	12	56.2402
YNL061W	8	11.3	4.53006	0	14	189.594
YDR060W	8	12.3	4.0621	0	4	176.895
YDR465C	8	12.3	4.63641	0	4	432.312
YHL044W	8	12.3	6.08224	1	8	4.03988
YJL050W	8	12.3	4.26794	0	10	102.776
YKR081C	8	12.3	4.09865	0	11	225.001
YOR206W	8	12.3	4.26042	0	15	240.09
YPL266W	8	12.3	6.64849	0	16	11.3243
YDL031W	8	13.3	4.13731	0	4	122.233
YDR299W	8	13.3	4.44867	0	4	328.443
YLR449W	8	13.3	5.18139	0	12	371.097
YMR229C	8	13.3	4.21378	0	13	248.554
YBR084W	8	14.3	4.34028	0	2	123.292
YJR002W	8	14.3	4.49986	0	10	131.673
YPL217C	8	14.3	4.36804	0	16	41.5066
YCR087C-A	8	15.3	4.38548	0	3	126.938
YHL047C	8	15.3	4.7148	1	8	3.03383
YHR138C	8	19.3	4.58445	0	8	113.34
YJL016W	8	19.3	4.34881	0	10	121.659
YKL092C	8	19.3	4.678	0	11	102.248
YOR219C	8	21.3	4.95214	0	15	249.166
YPL269W	8	21.3	4.4246	0	16	9.55669
YHL016C	8	22.3	5.77763	1	8	22.2787
YKR010C	8	22.3	3.97283	0	11	175.11
YLR455W	8	22.3	4.53256	0	12	379.309
YHL009C	8	23.3	4.36304	1	8	25.531
YOL112W	8	23.3	4.57057	0	15	35.2206
YEL061C	8	24.3	4.78554	0	5	13.8196
YHL014C	8	24.3	9.17238	1	8	23.2019
YOL011W	8	24.3	5.89488	0	15	100.757
YBL096C	8	25.3	4.06169	0	2	13.0168
YOR104W	8	27.3	4.58545	0	15	170.845
YBR007C	8	27.4	3.98131	0	2	75.2934
YCR089W	8	27.4	4.6417	0	3	128.361
YHL008C	8	27.4	5.4548	1	8	28.3681
YIL144W	8	27.4	4.34119	0	9	35.0972
YHL007C	8	28.3	5.20744	1	8	29.3938
YPL192C	8	30.3	4.32947	0	16	53.0708
YKL048C	8	31.3	4.24636	0	11	132.55
YOR343C	8	33.3	5.13777	0	15	319.598
YOL023W	8	34.3	4.42314	0	15	91.7534
YFL016C	8	35.3	4.37869	0	6	50.9626
YIL066C	8	41.3	4.44005	0	9	108.277
YKL197C	8	41.3	4.64511	0	11	28.0638
YHR021W-A	8	42.3	4.88354	1	8	44.742
YJL176C	8	45.3	4.28704	0	10	28.3501
YHR031C	8	46.3	8.79617	1	8	51.8599
YHR028C	8	49.7	18.3345	1	8	50.1941
YHR032W	8	49.7	4.30889	1	8	51.9724
YHR033W	8	49.7	15.4004	1	8	52.6356
YLR237W	8	50.3	8.96294	0	12	220.453
YHR035W	8	53.3	17.5737	1	8	53.4394
YJL092W	8	55.3	4.83235	0	10	77.2024
YHR052W-A	8	63.3	10.4776	1	8	63.7605
YHR054W-A	8	64.3	13.1221	1	8	64.3617
YHR054C	8	65.3	17.059	1	8	64.2837
YHR065C	8	66.3	8.83103	1	8	68.7111
YHR056C	8	67.3	15.8417	1	8	65.3598
YOR306C	8	70.3	4.22593	0	15	294.17
YHR101C	8	78.3	5.99658	1	8	94.716
YGR091W	8	88.3	4.0541	0	7	246.521
YHR096C	8	90.3	4.43404	1	8	88.9039
YJR052W	8	90.3	4.19595	0	10	159.613
YHR105W	8	91.3	4.30112	1	8	97.4214
YDR407C	8	121.2	4.33798	0	4	399.242
YDR318W	8	127.3	4.08671	0	4	342.162
YHR171W	8	136.3	9.22449	1	8	133.726
YHR179W	8	140.5	3.98493	1	8	138.749
YHR101C	9	13.9	4.68314	0	8	94.716
YIL167W	9	13.9	20.1516	1	9	13.2231
YIL168W	9	13.9	13.5786	1	9	13.0502
YKL047W	9	13.9	4.12787	0	11	132.674
YAR068W	9	14.9	14.2546	0	1	100.06
YHR214W-A	9	15.9	13.1937	0	8	162.945
YBR214W	9	22.9	3.98853	0	2	195.433
YIL139C	9	26.9	5.3923	1	9	39.8812
YIL146C	9	34.9	8.21945	1	9	34.0629
YIL151C	9	40.8	4.87261	1	9	27.2844
YIL128W	9	45.9	4.09615	1	9	51.1788
YAL037W	9	52.9	4.05789	0	1	33.327
YIL130W	9	54.9	7.68803	1	9	46.2141
YLR233C	9	56.9	5.21701	0	12	219.433
YIL124W	9	57.9	6.11051	1	9	56.7622
YIL119C	9	67.9	10.2961	1	9	62.0178
YOR263C	9	67.9	4.7691	0	15	270.349
YIL116W	9	69.1	9.21567	1	9	64.2925
YIL120W	9	69.1	10.7478	1	9	60.4596
YIL094C	9	78.9	4.52934	1	9	84.3986
YIL092W	9	94.9	4.60397	1	9	85.0433
YIL096C	9	98.7	4.08407	1	9	82.3732
YLR142W	9	98.7	4.17482	0	12	153.034
YOR220W	9	98.7	4.52512	0	15	249.271
YOR219C	9	98.9	4.15987	0	15	249.166
YHR138C	9	99.9	3.97488	0	8	113.34
YIL073C	9	99.9	4.6007	1	9	101.567
YIL083C	9	100.9	4.56521	1	9	92.0508
YDL234C	9	102.9	4.45416	0	4	11.268
YIL072W	9	103.9	4.70885	1	9	101.924
YPR145C-A	9	104.9	4.60034	0	16	239.229
YIL061C	9	105.9	6.57729	1	9	110.462
YKL089W	9	106.9	4.12034	0	11	103.745
YKL159C	9	108.9	4.79502	0	11	58.7034
YLR194C	9	108.9	4.23171	0	12	195.001
YPL181W	9	110.9	4.40462	0	16	58.9663
YIL059C	9	112.9	9.05433	1	9	111.072
YIL046W-A	9	113.9	8.11651	1	9	120.708
YGL127C	9	118.9	4.0642	0	7	100.202
YIL028W	9	119.9	6.41004	1	9	135.945
YIL029C	9	122.9	11.2455	1	9	135.565
YPL136W	9	133.9	4.34482	0	16	85.948
YIL014C-A	9	137.9	6.22422	1	9	146.516
YIL014W	9	137.9	5.43931	1	9	146.776
YDL174C	9	166.9	3.98212	0	4	45.7388
YGR266W	9	169.9	4.18505	0	7	378.37
YIR042C	9	174.9	9.12445	0	9	196.212
YIR027C	9	175.9	4.55455	1	9	183.456
YIR039C	9	182.7	16.2218	1	9	194.468
YJL213W	10	10.4	4.34912	1	10	9.6784
YJL217W	10	10.4	7.24493	1	10	6.97014
YLR173W	10	15.4	4.17684	0	12	180.881
YJL178C	10	23.4	9.79514	1	10	27.0169
YOL111C	10	27.2	4.0573	0	15	35.9421
YJL186W	10	30.4	8.44074	1	10	24.0416
YJR006W	10	31.4	4.00945	0	10	134.784
YJL163C	10	38.4	12.2573	1	10	34.009
YJL145W	10	39.4	4.60997	1	10	43.5887
YER046W	10	45	5.22749	0	5	85.1298
YHR022C	10	51.4	5.44369	0	8	45.0771
YJL108C	10	58.4	11.4511	1	10	65.6591
YJL164C	10	58.4	4.00244	0	10	33.3541
YJL107C	10	61.4	12.534	1	10	66.0063
YIL024C	10	65.1	4.34438	0	9	139.136
YAL049C	10	65.4	4.53065	0	1	23.6662
YOR349W	10	66.4	4.646	0	15	326.642
YLR137W	10	70.4	4.42931	0	12	150.096
YPL245W	10	71.4	4.69919	0	16	24.7708
YMR087W	10	72.4	4.03124	0	13	150.45
YMR245W	10	73.4	6.15634	0	13	257.866
YJL081C	10	74.4	6.20285	1	10	85.5503
YGL255W	10	76.4	6.10418	0	7	7.74435
YER081W	10	77.4	4.25487	0	5	112.961
YOR186W	10	78.4	3.99284	0	15	225.429
YJL078C	10	79.4	4.19859	1	10	88.1709
YJL089W	10	83.1	4.12844	1	10	79.7474
YJR005C-A	10	83.1	4.03933	0	10	134.651
YJL077W-B	10	85.4	5.55435	1	10	88.1908
YLR230W	10	90.4	4.12176	0	12	217.656
YBR224W	10	94.4	8.37	0	2	201.056
YJL070C	10	113.4	4.12438	0	10	93.1822
YDL065C	10	120.4	4.31818	0	4	104.536
YGL133W	10	120.4	4.31272	0	7	95.3629
YLR333C	10	120.4	4.4301	0	12	286.523
YMR240C	10	120.4	4.08379	0	13	255.381
YNL166C	10	120.4	4.2439	0	14	119.76
YLR051C	10	125.4	4.09546	0	12	88.9237
YDR216W	10	128.4	4.13013	0	4	277.42
YPR145W	10	128.4	5.23544	0	16	238.563
YJR030C	10	130.4	4.21634	1	10	145.882
YOR375C	10	134.4	4.80932	0	15	344.198
YJR015W	10	135.4	6.4454	1	10	138.853
YJR044C	10	154.4	4.54467	1	10	155.758
YJR061W	10	159.2	14.7262	1	10	165.135
YGL217C	10	163.4	4.19159	0	7	31.547
YJR062C	10	164.4	8.84814	1	10	166.433
YJR060W	10	165.4	6.08008	1	10	164.61
YPL116W	10	169.4	4.61332	0	16	95.6328
YJR094W-A	10	171.4	5.99209	1	10	182.464
YJR082C	10	176.3	9.18606	1	10	174.635
YJR099W	10	176.3	6.31468	1	10	184.651
YJR104C	10	176.3	11.6165	1	10	186.889
YDR481C	10	180.4	4.45004	0	4	440.251
YJR103W	10	184.4	6.10985	1	10	186.209
YMR069W	10	189.4	4.30817	0	13	138.596
YDL243C	10	190.4	4.48443	0	4	5.71247
YJR113C	10	192.4	4.96712	1	10	191.692
YJR112W-A	10	195.9	5.24707	1	10	191.336
YJR127C	10	195.9	5.58147	1	10	198.923
YJR128W	10	196.4	15.3552	1	10	198.882
YDL076C	10	198.4	5.06244	0	4	99.6708
YNL053W	10	198.4	4.42363	0	14	196.536
YJR135C	10	200.4	5.86972	1	10	203.029
YKR082W	10	200.4	5.07006	0	11	225.11
YGR098C	10	204.4	4.07598	0	7	254.345
YML085C	10	204.4	4.51189	0	13	33.769
YJR131W	10	205.4	6.26917	1	10	200.295
YLR447C	10	206.4	4.45107	0	12	370.038
YOR256C	10	206.4	4.36405	0	15	267.549
YER113C	10	207.4	4.08192	0	5	136.526
YBL088C	10	209.4	4.29048	0	2	17.7965
YCL010C	10	210.4	4.56907	0	3	50.0812
YDL159W-A	10	211.4	4.05841	0	4	53.3543
YBR021W	10	212.4	4.49725	0	2	84.4369
YJR155W	10	213.6	6.08477	1	10	218.191
YKL219W	11	10.6	4.17637	1	11	5.54355
YOR290C	11	29.6	6.40001	0	15	283.893
YKL184W	11	40.6	6.281	1	11	36.749
YOR083W	11	46.6	6.99406	0	15	158.247
YAL013W	11	50.6	4.76417	0	1	58.165
YCR033W	11	52.6	4.15492	0	3	89.529
YGL241W	11	59.6	5.03236	0	7	16.8126
YIL154C	11	61.6	4.73632	0	9	24.7342
YPR083W	11	66.6	3.97029	0	16	204.424
YFR026C	11	72.6	4.46023	0	6	98.992
YKL132C	11	72.6	15.573	1	11	74.0298
YKL140W	11	75.6	5.47527	1	11	68.6891
YJL106W	11	79.6	4.21727	0	10	66.4176
YGR292W	11	87.6	4.32289	0	7	398.333
YKL066W	11	91.6	4.72675	0	11	119.677
YKL096W	11	102.6	6.45365	1	11	99.0809
YGR102C	11	106.6	4.59763	0	7	257.195
YKL067W	11	106.6	4.57288	1	11	119.498
YJL019W	11	108.6	4.94906	0	10	120.85
YER181C	11	114.6	4.28094	0	5	193.096
YKL047W	11	126.6	6.55059	1	11	132.674
YHR075C	11	128.6	4.14042	0	8	74.8747
YKL091C	11	130.6	4.48388	0	11	102.701
YPR184W	11	133.6	4.24101	0	16	261.615
YDL076C	11	134.6	6.73356	0	4	99.6708
YHR104W	11	134.6	4.31295	0	8	97.0133
YLR270W	11	134.6	4.10288	0	12	245.192
YMR231W	11	135.6	4.30239	0	13	249.376
YKL093W	11	136.6	8.3241	0	11	100.472
YCR032W	11	137.6	4.83655	0	3	86.1833
YDR490C	11	137.6	5.18638	0	4	444.585
YKL074C	11	138.6	4.10479	0	11	112.416
YKL114C	11	138.6	4.66785	0	11	85.1326
YGL036W	11	140.6	5.00472	0	7	158.604
YHR121W	11	140.6	3.98627	0	8	105.839
YKL026C	11	140.6	5.81219	1	11	148.041
YLR422W	11	140.6	7.15006	0	12	347.702
YNL138W-A	11	140.6	4.3484	0	14	135.43
YDL134C	11	142.6	4.12544	0	4	68.4063
YNL242W	11	145.6	4.29626	0	14	70.7919
YPR060C	11	147.2	4.18274	0	16	195.932
YOR291W	11	150.6	5.52115	0	15	284.195
YLR142W	11	151.6	6.6909	0	12	153.034
YDR308C	11	152.6	4.11268	0	4	334.282
YKL010C	11	152.6	8.29721	1	11	161.692
YNL107W	11	152.6	4.31118	0	14	155.431
YKL017C	11	153.6	15.8306	1	11	154.624
YLR323C	11	153.6	4.37185	0	12	280.429
YMR258C	11	153.6	4.61837	0	13	266.614
YKL027W	11	154.6	5.85683	1	11	147.16
YBR126C	11	155.6	4.14285	0	2	147.137
YHR037W	11	156.6	4.32149	0	8	54.5702
YGL197W	11	157.6	4.04827	0	7	46.1748
YJR155W	11	163.6	4.01878	0	10	218.191
YPL140C	11	181.6	4.01676	0	16	83.8395
YEL004W	11	218.1	4.14424	0	5	51.478
YKR012C	11	218.1	4.25451	0	11	176.202
YOR188W	11	218.1	4.61424	0	15	226.307
YKR068C	11	220.6	5.40294	1	11	216.764
YKL092C	11	223.6	4.43059	0	11	102.248
YBR068C	11	225.6	4.29528	0	2	112.711
YKR089C	11	227.6	6.28584	1	11	231.03
YCL069W	11	240.8	4.44222	0	3	4.64144
YLL061W	12	12	5.40449	1	12	6.42184
YNL185C	12	16	4.31842	0	14	108.282
YLL055W	12	19	4.52379	1	12	10.7975
YOR051C	12	30	4.13212	0	15	140.587
YLL027W	12	31.4	5.87218	1	12	31.4198
YOR186C-A	12	38	4.62047	0	15	225.57
YDR252W	12	49	3.98583	0	4	298.624
YNL180C	12	55	4.02893	0	14	111.247
YLR030W	12	74.2	21.7253	1	12	73.1717
YLR031W	12	74.2	18.7186	1	12	73.5088
YLR032W	12	77	12.0469	1	12	73.785
YLR053C	12	89	8.24879	1	12	89.4462
YLR059C	12	89	5.52513	1	12	93.8166
YOR242C	12	89	4.89555	0	15	260.673
YJL221C	12	90	4.79916	0	10	5.59141
YLR057W	12	94	3.9658	1	12	91.9269
YER053C-A	12	96	4.164	0	5	91.386
YDL154W	12	97.6	4.57034	0	4	55.259
YJL100W	12	97.6	4.15424	0	10	71.1685
YOR072W-A	12	99	6.33471	0	15	152.376
YJR148W	12	103	4.71153	0	10	211.699
YLR063W	12	104	8.43682	1	12	95.1182
YKR088C	12	107	3.98476	0	11	229.907
YLR073C	12	108	4.86327	1	12	101.412
YPL251W	12	108	5.92772	0	16	21.3094
YPR035W	12	108	4.43234	0	16	186.235
YLR092W	12	125	7.87887	1	12	116.517
YDL168W	12	128	4.58093	0	4	49.4601
YPL166W	12	132	4.27593	0	16	68.8169
YDR170W-A	12	137	4.14737	0	4	249.023
YBR232C	12	141	4.04353	0	2	205.145
YJL188C	12	141	4.74574	0	10	22.9511
YGL255W	12	148	6.30702	0	7	7.74435
YMR141W-A	12	148	4.61792	0	13	187.321
YOL154W	12	148	4.67985	0	15	11.3884
YJL056C	12	153	4.74313	0	10	99.9326
YLR157W-D	12	153	4.72765	1	12	171.262
YLR156W	12	155	7.28936	1	12	169.944
YLR159W	12	155	6.86538	1	12	174.719
YDL042C	12	156	6.01864	0	4	117.331
YDR174W	12	156	5.09367	0	4	251.788
YJL213W	12	167	4.13993	0	10	9.6784
YLR157W-E	12	170	13.5316	1	12	173.466
YLR158C	12	170	16.4437	1	12	174.103
YLR155C	12	171	14.1334	1	12	169.328
YLR157C	12	171	13.1496	1	12	170.646
YLR160C	12	172	13.8059	1	12	175.42
YLR161W	12	172	6.84753	1	12	176.037
YLR165C	12	173	8.85071	1	12	178.296
YLR173W	12	173	5.62014	1	12	180.881
YLR164W	12	178	8.66767	1	12	177.8
YNR061C	12	188	4.29267	0	14	275.09
YIR041W	12	194	5.3655	0	9	195.287
YLR179C	12	195	6.11995	1	12	185.314
YLL022C	12	204	4.03508	0	12	36.0263
YLR191W	12	204	4.05853	1	12	193.45
YGR147C	12	205	4.10785	0	7	291.16
YPR174C	12	206	4.08911	0	16	257.732
YDR543C	12	208	4.07179	0	4	472.709
YGR117C	12	211	4.05143	0	7	268.83
YDL076C	12	212	4.628	0	4	99.6708
YNL334C	12	213	3.9989	0	14	4.75801
YOR384W	12	213	4.58701	0	15	350.306
YHR155W	12	214	4.48847	0	8	122.177
YDR004W	12	215	4.43007	0	4	141.121
YGL194C-A	12	215	6.22754	0	7	51.8211
YDR544C	12	216	4.3356	0	4	472.892
YMR070W	12	216	4.95419	0	13	139.088
YNL222W	12	217	6.70133	0	14	84.7496
YLR169W	12	218	4.66541	0	12	180.128
YLR199C	12	219	5.35442	0	12	197.562
YGR234W	12	221	5.24094	0	7	355.183
YGL122C	12	222	4.15102	0	7	103.811
YGR052W	12	222	4.07943	0	7	219.632
YHR048W	12	222	4.27172	0	8	61.3797
YDR345C	12	223	5.63704	0	4	361.055
YGL179C	12	223	5.76001	0	7	61.1091
YOR065W	12	223	6.74494	0	15	147.632
YEL071W	12	224	3.99369	0	5	5.7045
YBR203W	12	225.5	4.89279	0	2	188.746
YJL101C	12	225.5	4.10148	0	10	70.8971
YJR150C	12	225.5	7.35001	0	10	212.885
YKR069W	12	225.5	4.32659	0	11	217.031
YLR246W	12	225.5	12.9502	1	12	225.748
YLR380W	12	225.5	4.67647	0	12	316.201
YML101C	12	225.5	5.11777	0	13	23.8347
YMR184W	12	225.5	4.36644	0	13	213.61
YNR019W	12	225.5	3.99352	0	14	246.201
YNR026C	12	225.5	5.06214	0	14	249.656
YOR049C	12	225.5	5.75323	0	15	139.811
YOR237W	12	225.5	6.63071	0	15	258.076
YPR150W	12	225.5	4.23595	0	16	240.984
YLR141W	12	227	4.26098	0	12	152.494
YMR102C	12	227	4.69391	0	13	160.603
YDL124W	12	228	5.65892	0	4	74.4703
YOR187W	12	228	4.44467	0	15	225.733
YPR124W	12	228	4.33885	0	16	228.021
YBL099W	12	229	5.63635	0	2	11.0842
YKL109W	12	229	7.53657	0	11	88.0883
YBL111C	12	230	3.9961	0	2	1.20149
YJR048W	12	230	11.9935	0	10	157.899
YJR116W	12	230	6.58284	0	10	192.249
YJR121W	12	230	4.77578	0	10	194.29
YLR248W	12	230	5.83221	1	12	228.314
YDR044W	12	231	4.73761	0	4	169.486
YDR518W	12	231	7.21072	0	4	458.342
YFL058W	12	231	8.91729	0	6	6.17044
YLL013C	12	231	4.37314	0	12	44.8495
YLL058W	12	231	6.00068	0	12	8.44277
YLR446W	12	231	4.11156	0	12	369.073
YDR492W	12	232	4.36045	0	4	444.787
YGL191W	12	232	7.07249	0	7	53.6141
YJL143W	12	232	4.39453	0	10	44.1729
YJR156C	12	232	11.1284	0	10	218.848
YLR281C	12	232	6.20705	0	12	253.766
YLR464W	12	232	4.69797	0	12	383.969
YNL332W	12	232	9.3853	0	14	5.48169
YOR378W	12	232	5.66551	0	15	346.329
YPR202W	12	232	4.52331	0	16	273.527
YEL044W	12	233	4.40204	0	5	24.4022
YGR281W	12	233	8.99203	0	7	389.535
YHL049C	12	233	4.43652	0	8	1.33177
YHR218W	12	233	5.34576	0	8	167.449
YIL037C	12	233	3.9668	0	9	128.229
YLR069C	12	233	5.24853	0	12	98.6358
YLR214W	12	233	4.45383	0	12	204.732
YDL244W	12	234	10.2784	0	4	4.98021
YDR471W	12	234	4.22794	0	4	434.537
YGR088W	12	234	5.03066	0	7	242.185
YLR205C	12	234	14.4405	0	12	199.365
YLR250W	12	234	4.34488	1	12	230.495
YML054C	12	234	25.6935	0	13	56.8901
YNL111C	12	234	9.41678	0	14	154.395
YNR017W	12	234	4.25345	0	14	245.304
YNR036C	12	234	4.02388	0	14	257.095
YOR377W	12	234	5.00835	0	15	345.247
YBR146W	12	235	6.60546	0	2	160.612
YBR192W	12	235	4.05876	0	2	182.28
YCL055W	12	235	5.57842	0	3	13.3886
YER081W	12	235	4.02058	0	5	112.961
YGL001C	12	235	4.92899	0	7	183.742
YGL157W	12	235	4.27369	0	7	77.3331
YGR041W	12	235	4.39251	0	7	213.687
YHR109W	12	235	5.36831	0	8	99.0889
YLR253W	12	235	6.28965	1	12	231.326
YPR151C	12	235	21.6837	0	16	241.18
YJL062W-A	12	236	4.62616	0	10	95.0134
YJR047C	12	236	4.67257	0	10	157.613
YKL038W	12	236	4.31612	0	11	138.812
YLL012W	12	236	5.7216	0	12	45.1446
YLR466C-B	12	236	4.06659	0	12	385.819
YML047C	12	236	4.293	0	13	61.5613
YML054C-A	12	236	5.29291	0	13	57.0506
YNR074C	12	236	4.62231	0	14	288.112
YJL222W	12	237	4.41981	0	10	3.47369
YNL155W	12	237	4.01039	0	14	126.762
YNR040W	12	237	4.0574	0	14	258.894
YOL033W	12	237	5.31859	0	15	86.9379
YBR182C-A	12	238	6.65911	0	2	178.644
YDR375C	12	238	7.1331	0	4	380.223
YGL101W	12	238	14.352	0	7	115.536
YIL070C	12	238	7.00356	0	9	103.937
YIL173W	12	238	4.24753	0	9	5.15574
YMR015C	12	238	8.39975	0	13	102.807
YOL113W	12	238	6.38185	0	15	34.4337
YBR200W	12	239	4.36029	0	2	186.253
YCR046C	12	239	5.09368	0	3	101.019
YIR029W	12	239	4.26534	0	9	184.88
YLR153C	12	239	11.3318	0	12	161.09
YNL018C	12	239	4.15893	0	14	222.649
YHR001W	12	240	4.43559	0	8	31.823
YNR041C	12	241	5.48642	0	14	259.621
YOR316C-A	12	241	4.18237	0	15	299.614
YGR266W	12	242	10.9054	0	7	378.37
YGR257C	12	243	6.64988	0	7	372.689
YPL252C	12	243	4.06293	0	16	21.3835
YDR347W	12	244	5.81992	0	4	362.452
YGL236C	12	244	4.43316	0	7	20.651
YHL004W	12	244	5.06954	0	8	29.7774
YML075C	12	244	7.44941	0	13	40.449
YOR348C	12	245	4.04171	0	15	326.309
YLR276C	12	247.4	4.67759	1	12	250.831
YNL156C	12	247.4	4.42544	0	14	126.56
YPL189C-A	12	247.4	4.65642	0	16	54.6505
YOR356W	12	248	4.0107	0	15	332.394
YHR202W	12	249	5.01046	0	8	150.74
YDL086W	12	253	4.4328	0	4	93.4416
YDL174C	12	253	8.07184	0	4	45.7388
YKR047W	12	254	7.0329	0	11	199.418
YPL280W	12	254	4.44115	0	16	3.42924
YMR322C	12	255	4.81574	0	13	312.512
YML126C	12	256	5.80778	0	13	6.95502
YKL185W	12	257	4.55378	0	11	35.8895
YLR267W	12	262	4.27965	1	12	244.123
YLR300W	12	262	15.4448	1	12	262.428
YMR165C	12	263	4.38959	0	13	201.492
YLR290C	12	265	8.98823	1	12	258.465
YLR283W	12	269	5.47557	1	12	253.847
YCR045W-A	12	283	4.17753	0	3	100.217
YLR343W	12	284	10.0604	1	12	293.796
YLR351C	12	299	5.4889	1	12	298.941
YAR068W	12	310	4.76638	0	1	100.06
YHR214W-A	12	311.8	5.09475	0	8	162.945
YLR279W	12	312	4.23666	0	12	253.531
YGR201C	12	318	4.43881	0	7	334.197
YDR425W	12	319	4.31547	0	4	409.182
YLR389C	12	332	9.2528	1	12	324.951
YLR361C	12	334	5.54861	0	12	305.706
YLR397C	12	335	6.50526	1	12	329.342
YLR411W	12	337	14.4816	1	12	340.985
YLR424W	12	355.6	5.96774	1	12	350.403
YAR071W	13	9.6	12.1635	0	1	101.434
YBR091C	13	9.6	4.3556	0	2	128.23
YBR093C	13	9.6	6.88233	0	2	129.272
YBR296C	13	9.6	10.1397	0	2	239.535
YCR011C	13	9.6	6.16815	0	3	65.7042
YCR037C	13	9.6	13.2631	0	3	94.664
YDL057W	13	9.6	4.91229	0	4	108.936
YDR004W	13	9.6	3.98487	0	4	141.121
YDR281C	13	9.6	10.019	0	4	316.902
YDR374W-A	13	9.6	4.28064	0	4	379.671
YDR481C	13	9.6	7.71498	0	4	440.251
YER060W	13	9.6	4.5365	0	5	96.1205
YER072W	13	9.6	8.09239	0	5	106.009
YER119C	13	9.6	4.44537	0	5	140.315
YFL004W	13	9.6	8.76022	0	6	63.232
YHR007C-A	13	9.6	5.27639	0	8	36.8238
YHR136C	13	9.6	9.43029	0	8	112.558
YHR214C-E	13	9.6	6.93831	0	8	165.493
YHR215W	13	9.6	12.6472	0	8	165.673
YIL177W-A	13	9.6	6.04035	0	9	0.364134
YJL012C	13	9.6	11.7461	0	10	124.01
YJL117W	13	9.6	7.51974	0	10	57.7789
YKL064W	13	9.6	4.80304	0	11	120.621
YKR080W	13	9.6	5.81762	0	11	224.184
YLR410W	13	9.6	6.62951	0	12	337.486
YMR040W	13	9.6	4.70784	0	13	119.096
YOR083W	13	9.6	4.40048	0	15	158.247
YOR396C-A	13	9.6	8.13421	0	15	359.855
YPL018W	13	9.6	9.04936	0	16	150.092
YPL019C	13	9.6	11.8985	0	16	149.908
YML005W	13	10.6	4.60006	0	13	88.4376
YML124C	13	10.6	5.33841	1	13	7.91569
YML133W-B	13	10.6	6.70036	1	13	0.252804
YAR070C	13	11.6	4.22565	0	1	101.165
YGL170C	13	11.6	4.46118	0	7	68.6101
YLL067W-A	13	11.6	7.20365	0	12	0.260414
YML116W	13	11.6	4.47441	1	13	12.9673
YDL109C	13	12.6	5.49337	0	4	82.8537
YLR467C-A	13	12.6	5.2021	0	12	387.915
YPL283W-B	13	12.6	8.20689	0	16	0.167673
YGR156W	13	13.6	4.12523	0	7	296.189
YHL042W	13	13.6	4.01362	0	8	4.67077
YLR438W	13	13.6	5.24812	0	12	364.492
YLR466C-A	13	13.6	6.62837	0	12	385.516
YPR121W	13	13.6	6.01406	0	16	225.812
YFL068W	13	14.6	4.9797	0	6	-0.0132554
YHL050W-A	13	14.6	7.00123	0	8	0.212564
YHR219C-A	13	14.6	6.21545	0	8	168.549
YPL056C	13	14.6	5.62725	0	16	131.545
YDR545C-A	13	15.6	6.96076	0	4	474.696
YBL113W-A	13	16.6	5.42816	0	2	0.160431
YEL077W-A	13	16.6	4.46906	0	5	0.201079
YNL251C	13	16.6	7.65186	0	14	64.505
YPR204C-A	13	16.6	6.74498	0	16	274.776
YBR297W	13	17.6	9.11649	0	2	240.135
YLR137W	13	17.6	4.6212	0	12	150.096
YNL339W-B	13	17.6	5.63385	0	14	0.265709
YOL123W	13	17.6	4.2387	0	15	28.9938
YFL067W	13	18.6	4.39396	0	6	0.36278
YGR296C-B	13	18.6	7.84635	0	7	403.375
YHR069C-A	13	18.6	6.06376	0	8	70.5655
YIL074C	13	18.6	4.53244	0	9	100.072
YLL066W-A	13	18.6	7.08245	0	12	2.29214
YCL064C	13	19.6	8.9201	0	3	8.08501
YER190C-B	13	19.6	4.7529	0	5	201.623
YJL225W-A	13	19.6	6.95795	0	10	0.280759
YJL088W	13	20.6	4.70931	0	10	80.6073
YDR185C	13	21.6	4.08399	0	4	258.091
YOR349W	13	21.6	4.38193	0	15	326.642
YML089C	13	23.6	5.40113	1	13	31.099
YDR173C	13	25.6	4.53523	0	4	251.639
YBL001C	13	27.6	4.01777	0	2	71.222
YPL003W	13	30.6	4.76279	0	16	160.068
YER069W	13	36.6	4.8545	0	5	103.419
YLR089C	13	37.6	4.13038	0	12	115.245
YML110C	13	40.6	6.17567	0	13	17.3147
YBR208C	13	42.6	12.4406	0	2	192.666
YOR127W	13	42.6	4.24597	0	15	185.172
YBL105C	13	46.8	4.18968	0	2	5.27572
YDR277C	13	46.8	4.7394	0	4	314.854
YML076C	13	46.8	5.77415	1	13	39.2412
YML079W	13	46.8	6.73134	1	13	37.5065
YCR005C	13	49.6	4.11482	0	3	58.7168
YIL051C	13	52.6	5.49584	0	9	116.192
YER129W	13	53.6	4.53453	0	5	146.088
YML057W	13	57.6	4.14284	1	13	54.4716
YHR141C	13	62.6	4.02426	0	8	114.725
YML029W	13	62.6	5.23855	1	13	73.8751
YML097C	13	62.6	4.22156	0	13	27.1066
YGR118W	13	65.6	4.06388	0	7	269.014
YML030W	13	72.8	6.22436	1	13	73.5601
YML042W	13	75.6	6.25454	1	13	65.5356
YML003W	13	86.6	6.99935	1	13	89.5459
YML002W	13	88.6	4.84057	1	13	89.9054
YMR005W	13	90.6	6.24278	1	13	93.8146
YMR007W	13	93.4	5.81502	1	13	95.1461
YJL101C	13	102.6	4.5249	0	10	70.8971
YMR019W	13	106.6	6.23242	1	13	106.096
YDR170W-A	13	125.6	5.48975	0	4	249.023
YMR092C	13	146.6	7.07438	1	13	154.178
YIR036W-A	13	156.3	4.1014	0	9	190.204
YMR150C	13	168.6	4.08257	0	13	191.264
YPL038W-A	13	171.6	4.89465	0	16	139.218
YNL156C	13	180	4.67661	0	14	126.56
YDL168W	13	198.2	4.30098	0	4	49.4601
YMR181C	13	219.2	14.056	1	13	212.209
YMR182C	13	219.2	6.85848	1	13	212.58
YMR216C	13	234.6	4.39466	1	13	238.346
YMR172C-A	13	236.6	5.68723	0	13	206.802
YMR209C	13	240.6	4.33115	1	13	233.68
YMR267W	13	262.6	8.38746	1	13	272.568
YMR247C	13	263.6	5.04559	1	13	261.085
YMR259C	13	266.6	4.93898	1	13	268.181
YMR266W	13	270.6	20.6751	1	13	271.461
YMR264W	13	276.6	6.47334	1	13	270.537
YMR272C	13	279.6	5.36183	1	13	275.634
YMR277W	13	279.6	4.08872	1	13	278.86
YER121W	13	287.6	4.52173	0	5	140.853
YEL069C	13	303	4.18644	0	5	8.11095
YMR316C-B	13	303	6.58733	1	13	308.618
YMR317W	13	303	4.10337	1	13	308.528
YBR240C	14	10.6	4.42556	0	2	210.588
YGR075C	14	10.6	4.53878	0	7	235.609
YNL327W	14	10.6	4.71002	1	14	8.89106
YNL328C	14	10.6	4.48231	1	14	8.60507
YKL115C	14	32.6	4.05066	0	11	84.6877
YNL282W	14	39.6	4.18975	1	14	39.8775
YNL291C	14	42.6	4.34748	1	14	31.7906
YNL256W	14	53.6	5.4366	1	14	60.9226
YNL272C	14	56.6	4.43855	1	14	47.7863
YNL261W	14	57.6	4.59134	1	14	57.4027
YLR173W	14	61.6	4.29929	0	12	180.881
YNL242W	14	67.6	5.60048	1	14	70.7919
YBR113W	14	103.6	4.06422	0	2	139.675
YNL195C	14	109.6	5.0154	1	14	100.717
YOR280C	14	124.6	5.40777	0	15	279.126
YJL126W	14	125.6	4.91953	0	10	55.3745
YNL161W	14	126.6	4.91379	1	14	123.106
YLR311C	14	128.6	5.44826	0	12	272.755
YKL112W	14	131.6	4.49551	0	11	85.937
YNL152W	14	132.6	5.00164	1	14	128.162
YLR284C	14	133.6	5.11266	0	12	254.517
YNL142W	14	134.6	4.93683	1	14	132.268
YNL134C	14	135.6	10.2569	1	14	138.212
YJL057C	14	139.6	4.50958	0	10	99.0445
YNL128W	14	143.4	12.8983	1	14	141.448
YDR161W	14	150.6	4.01109	0	4	241.534
YOR004W	14	151.6	4.32696	0	15	110.074
YOR301W	14	151.6	4.04975	0	15	290.717
YGR170W	14	152.6	4.18681	0	7	309.729
YLR092W	14	152.6	4.29132	0	12	116.517
YNL153C	14	152.6	4.89036	0	14	128.068
YDR022C	14	153.6	4.53147	0	4	151.507
YKR088C	14	153.6	4.00783	0	11	229.907
YDR226W	14	154.6	4.92154	0	4	284.071
YDR443C	14	154.6	4.45761	0	4	418.472
YHR100C	14	154.6	4.09331	0	8	94.3857
YML008C	14	154.6	4.80338	0	13	85.9806
YBR213W	14	155.6	4.72376	0	2	195.118
YGR024C	14	155.6	4.34017	0	7	197.097
YGR146C-A	14	155.6	4.40689	0	7	290.612
YIL096C	14	155.6	4.56118	0	9	82.3732
YMR118C	14	155.6	4.58735	0	13	170.944
YNL117W	14	155.6	4.22129	1	14	150.336
YOR262W	14	155.6	4.49073	0	15	269.731
YPL214C	14	155.6	5.38638	0	16	43.5469
YBL002W	14	156.6	4.88714	0	2	70.9293
YBR294W	14	156.6	4.79772	0	2	236.749
YCL059C	14	156.6	6.86206	0	3	11.2046
YDR478W	14	156.6	4.50038	0	4	438.496
YGL055W	14	156.6	4.15139	0	7	147.516
YLR449W	14	156.6	4.70076	0	12	371.097
YNL257C	14	156.6	5.87093	0	14	60.8106
YOR308C	14	156.6	4.7812	0	15	295.805
YDL121C	14	157.6	3.97415	0	4	76.1267
YER078C	14	157.6	6.98776	0	5	111.443
YKL104C	14	157.6	6.18626	0	11	93.0877
YPL239W	14	157.6	4.15413	0	16	28.8093
YCL005W	14	158.6	5.09564	0	3	51.8448
YDL089W	14	158.6	8.14431	0	4	92.0209
YDR164C	14	158.6	7.28159	0	4	243.138
YHR165C	14	158.6	7.0381	0	8	131.105
YIR026C	14	158.6	3.9658	0	9	182.702
YML004C	14	158.6	4.30784	0	13	89.2748
YNL030W	14	158.6	3.97725	0	14	213.354
YBR090C	14	159.6	4.90393	0	2	127.939
YDR085C	14	159.6	5.75429	0	4	191.008
YHR209W	14	159.6	7.01957	0	8	155.87
YIL107C	14	159.6	4.76669	0	9	74.5659
YIR015W	14	159.6	8.51065	0	9	171.903
YLL019C	14	159.6	5.36923	0	12	38.7971
YBR112C	14	160.6	4.35904	0	2	139.737
YDL036C	14	160.6	7.93499	0	4	120.581
YDL129W	14	160.6	7.26998	0	4	71.5967
YDL237W	14	160.6	5.82138	0	4	9.4611
YDR110W	14	160.6	4.0156	0	4	209.615
YDR227W	14	160.6	5.19816	0	4	284.408
YDR368W	14	160.6	3.99291	0	4	376.305
YKR070W	14	160.6	6.5403	0	11	217.777
YLR028C	14	160.6	6.97792	0	12	72.4595
YLR439W	14	160.6	4.33366	0	12	365.209
YMR027W	14	160.6	5.31726	0	13	110.762
YMR070W	14	160.6	4.44498	0	13	139.088
YMR162C	14	160.6	4.27635	0	13	198.525
YNL022C	14	160.6	5.14535	0	14	219.356
YOL022C	14	160.6	4.7047	0	15	92.8888
YOL111C	14	160.6	4.16373	0	15	35.9421
YCR036W	14	161.6	13.1841	0	3	92.7975
YDR384C	14	161.6	4.47134	0	4	385.03
YER006W	14	161.6	7.10835	0	5	56.9874
YER075C	14	161.6	6.79797	0	5	108.947
YFL029C	14	161.6	4.17976	0	6	37.9695
YGL166W	14	161.6	4.58825	0	7	70.7289
YGR095C	14	161.6	4.84286	0	7	250.224
YGR098C	14	161.6	7.43927	0	7	254.345
YGR218W	14	161.6	7.36412	0	7	345.076
YHR083W	14	161.6	4.56689	0	8	81.7509
YHR115C	14	161.6	5.64701	0	8	102.412
YJR066W	14	161.6	9.17066	0	10	167.8
YKL085W	14	161.6	4.10829	0	11	105.924
YLR450W	14	161.6	4.12196	0	12	371.744
YMR312W	14	161.6	4.41239	0	13	305.482
YOR304W	14	161.6	4.94289	0	15	291.888
YBL055C	14	162.6	4.70455	0	2	35.0653
YBR080C	14	162.6	7.30473	0	2	120.242
YDL040C	14	162.6	7.09932	0	4	118.261
YDL078C	14	162.6	4.06526	0	4	98.0735
YDR260C	14	162.6	4.22145	0	4	302.913
YDR525W-A	14	162.6	4.32943	0	4	462.063
YER088C	14	162.6	4.68752	0	5	117.328
YGL150C	14	162.6	5.84467	0	7	83.4651
YLR125W	14	162.6	5.27054	0	12	141.647
YLR427W	14	162.6	6.19166	0	12	355.819
YLR454W	14	162.6	6.82115	0	12	375.841
YMR304W	14	162.6	8.37267	0	13	297.507
YNL074C	14	162.6	5.38484	1	14	181.068
YNL103W	14	162.6	8.78016	1	14	158.264
YNL197C	14	162.6	4.35355	0	14	99.7132
YNL233W	14	162.6	7.77863	0	14	78.4049
YPL006W	14	162.6	5.71902	0	16	157.923
YBL032W	14	163.6	5.54026	0	2	48.0864
YDL140C	14	163.6	4.62117	0	4	65.2365
YER094C	14	163.6	5.2886	0	5	122.274
YFL007W	14	163.6	6.02152	0	6	59.2353
YGR126W	14	163.6	3.96343	0	7	275.995
YIL047C-A	14	163.6	7.32134	0	9	119.428
YJL026W	14	163.6	4.796	0	10	117.707
YJL062W	14	163.6	4.47209	0	10	95.1822
YJL091C	14	163.6	5.10746	0	10	78.7375
YKL129C	14	163.6	5.06666	0	11	76.0393
YLR074C	14	163.6	4.96399	0	12	101.713
YMR043W	14	163.6	7.22834	0	13	120.283
YNL031C	14	163.6	4.38621	0	14	213.103
YNL274C	14	163.6	6.82364	0	14	45.2307
YOL057W	14	163.6	7.07479	0	15	72.8154
YOR124C	14	163.6	7.38572	0	15	184.34
YOR274W	14	163.6	6.6573	0	15	276.451
YPL091W	14	163.6	7.40976	0	16	108.931
YPL105C	14	163.6	9.81742	0	16	103.11
YBR218C	14	164.6	6.05782	0	2	198.689
YDL160C	14	164.6	4.18287	0	4	53.2763
YDR170C	14	164.6	10.5654	0	4	248.722
YER047C	14	164.6	5.56876	0	5	86.2934
YFL022C	14	164.6	5.68472	0	6	45.5777
YFR025C	14	164.6	6.58139	0	6	98.2672
YGL173C	14	164.6	9.00417	0	7	66.659
YGR058W	14	164.6	4.20437	0	7	224.26
YGR111W	14	164.6	3.97209	0	7	264.876
YGR184C	14	164.6	7.84955	0	7	320.321
YGR232W	14	164.6	4.9052	0	7	352.989
YHR007C-A	14	164.6	4.39094	0	8	36.8238
YHR074W	14	164.6	6.80954	0	8	73.8433
YHR120W	14	164.6	4.28287	0	8	104.882
YIL137C	14	164.6	8.04443	0	9	41.7133
YLL010C	14	164.6	8.31275	0	12	46.9728
YLR017W	14	164.6	5.71655	0	12	63.9109
YLR019W	14	164.6	3.98297	0	12	64.8772
YLR087C	14	164.6	5.20237	0	12	113.702
YLR350W	14	164.6	4.08721	0	12	298.352
YMR011W	14	164.6	5.73168	0	13	97.9071
YMR308C	14	164.6	5.36836	0	13	303.379
YNL211C	14	164.6	4.2699	0	14	92.5904
YPL085W	14	164.6	10.4026	0	16	112.278
YAL033W	14	165.6	7.64914	0	1	37.2436
YBL050W	14	165.6	8.62808	0	2	37.5585
YDR127W	14	165.6	10.2487	0	4	218.416
YDR317W	14	165.6	5.41585	0	4	341.672
YDR346C	14	165.6	4.6266	0	4	362.291
YEL056W	14	165.6	4.98083	0	5	16.4919
YFL031W	14	165.6	7.05884	0	6	36.0579
YIL129C	14	165.6	15.0777	0	9	50.9225
YJR103W	14	165.6	10.9991	0	10	186.209
YKR080W	14	165.6	5.68989	0	11	224.184
YLL018C-A	14	165.6	6.06524	0	12	39.1833
YLL040C	14	165.6	11.5563	0	12	22.8684
YLR420W	14	165.6	4.56382	0	12	346.941
YLR421C	14	165.6	5.84	0	12	347.58
YMR083W	14	165.6	5.05799	0	13	147.815
YMR189W	14	165.6	5.23357	0	13	216.782
YMR211W	14	165.6	5.25437	0	13	234.29
YOR007C	14	165.6	6.27402	0	15	112.181
YOR232W	14	165.6	4.02271	0	15	255.626
YOR336W	14	165.6	9.96836	0	15	313.418
YOR367W	14	165.6	6.19312	0	15	338.584
YPL010W	14	165.6	5.33022	0	16	155.133
YDL066W	14	166.6	3.96576	0	4	103.779
YDL145C	14	166.6	12.462	0	4	61.4021
YER031C	14	166.6	6.52106	0	5	75.1734
YGL137W	14	166.6	15.4236	0	7	92.4608
YHR162W	14	166.6	4.35158	0	8	126.954
YKR076W	14	166.6	7.05836	0	11	221.094
YLR429W	14	166.6	4.17333	0	12	356.665
YNL149C	14	166.6	4.51731	0	14	129.431
YBR287W	14	167.6	5.01112	0	2	232.953
YDR279W	14	167.6	5.53057	0	4	315.988
YER163C	14	167.6	7.91512	0	5	176.318
YFL017W-A	14	167.6	4.99503	0	6	49.7455
YGL206C	14	167.6	12.5135	0	7	39.8142
YGL242C	14	167.6	7.5536	0	7	16.7206
YJL196C	14	167.6	4.3824	0	10	20.6384
YLL001W	14	167.6	10.898	0	12	53.1956
YLR304C	14	167.6	16.2723	0	12	265.529
YLR359W	14	167.6	4.67916	0	12	303.96
YPL250C	14	167.6	4.43002	0	16	21.626
YAL044C	14	168	7.94422	0	1	26.3117
YAL051W	14	168	9.81264	0	1	21.8486
YAR018C	14	168	4.98347	0	1	77.2439
YBL047C	14	168	10.6231	0	2	39.6367
YBL058W	14	168	6.15271	0	2	33.4446
YBR002C	14	168	4.89133	0	2	72.7549
YBR052C	14	168	4.55551	0	2	101.841
YBR059C	14	168	6.07031	0	2	108.077
YBR061C	14	168	4.55313	0	2	109.731
YBR065C	14	168	5.06013	0	2	110.914
YBR069C	14	168	4.06542	0	2	113.531
YBR097W	14	168	5.03813	0	2	131.075
YBR229C	14	168	5.25454	0	2	203.789
YCR017C	14	168	5.94121	0	3	70.8737
YDL019C	14	168	4.47233	0	4	130.694
YDL047W	14	168	4.7804	0	4	114.635
YDL057W	14	168	4.474	0	4	108.936
YDL072C	14	168	4.10494	0	4	102.422
YDL104C	14	168	4.22239	0	4	85.2334
YDL241W	14	168	9.64607	0	4	6.3539
YDR080W	14	168	7.80337	0	4	187.235
YDR123C	14	168	8.43003	0	4	216.86
YDR146C	14	168	4.3691	0	4	232.759
YDR154C	14	168	5.13637	0	4	238.344
YDR198C	14	168	5.4379	0	4	264.728
YDR261C	14	168	5.15609	0	4	303.528
YDR452W	14	168	5.9366	0	4	422.496
YEL043W	14	168	4.15935	0	5	24.6547
YER005W	14	168	4.96835	0	5	56.2283
YER166W	14	168	4.27938	0	5	179.449
YFL018C	14	168	6.64839	0	6	49.4711
YGL022W	14	168	4.13637	0	7	167.41
YGL026C	14	168	9.76774	0	7	165.978
YGL178W	14	168	4.81445	0	7	61.9444
YGL203C	14	168	4.09078	0	7	42.4628
YGL224C	14	168	5.1804	0	7	29.2023
YGL238W	14	168	4.06153	0	7	18.3356
YGR017W	14	168	4.48624	0	7	193.841
YGR092W	14	168	5.25426	0	7	247.205
YGR135W	14	168	6.2727	0	7	281.737
YGR167W	14	168	4.52311	0	7	307.994
YGR250C	14	168	4.46559	0	7	367.591
YHR053C	14	168	6.3063	0	8	63.8237
YHR055C	14	168	6.09568	0	8	64.4249
YHR057C	14	168	7.74913	0	8	65.6616
YHR109W	14	168	4.51322	0	8	99.0889
YHR155W	14	168	6.18364	0	8	122.177
YIL005W	14	168	9.721	0	9	155.603
YJL020C	14	168	5.77001	0	10	120.703
YJL047C	14	168	4.62494	0	10	105.647
YJL165C	14	168	7.25008	0	10	32.843
YJL183W	14	168	5.1111	0	10	25.2126
YJL192C	14	168	6.79164	0	10	22.0246
YJR065C	14	168	6.02492	0	10	167.722
YJR129C	14	168	4.0013	0	10	199.51
YJR131W	14	168	4.2544	0	10	200.295
YKL020C	14	168	4.77414	0	11	152.667
YKL074C	14	168	4.15242	0	11	112.416
YKL145W	14	168	4.95238	0	11	66.1988
YKL190W	14	168	4.22713	0	11	31.506
YKL214C	14	168	4.55509	0	11	12.0785
YKR005C	14	168	8.05245	0	11	170.825
YKR104W	14	168	4.36163	0	11	249.471
YLL032C	14	168	5.15903	0	12	27.5843
YLL038C	14	168	6.48631	0	12	23.9025
YLL056C	14	168	7.89494	0	12	10.1479
YLR174W	14	168	5.47013	0	12	181.664
YLR213C	14	168	5.45552	0	12	204.5
YLR256W	14	168	4.30487	0	12	232.688
YLR278C	14	168	7.44725	0	12	253.428
YLR342W	14	168	6.15264	0	12	291.597
YLR430W	14	168	4.47683	0	12	357.623
YLR452C	14	168	5.55113	0	12	374.893
YML059C	14	168	6.67773	0	13	53.8195
YML072C	14	168	9.46182	0	13	44.0099
YML085C	14	168	6.23475	0	13	33.769
YML104C	14	168	4.19212	0	13	21.1884
YML130C	14	168	5.06402	0	13	4.45185
YMR265C	14	168	4.31789	0	13	271.259
YNL053W	14	168	6.99918	0	14	196.536
YNL077W	14	168	6.55339	1	14	178.491
YNL115C	14	168	6.04655	1	14	152.448
YNL167C	14	168	7.36217	0	14	118.941
YNL243W	14	168	10.0773	0	14	69.5821
YOL004W	14	168	6.61234	0	15	104.58
YOL072W	14	168	6.09928	0	15	64.302
YOL109W	14	168	4.31656	0	15	36.4045
YOL112W	14	168	4.23246	0	15	35.2206
YOL119C	14	168	5.0563	0	15	31.8048
YOR008C	14	168	9.26376	0	15	112.985
YOR035C	14	168	3.98385	0	15	132.016
YOR086C	14	168	7.04816	0	15	160.645
YOR087W	14	168	4.51981	0	15	160.952
YOR092W	14	168	3.97896	0	15	163.407
YOR136W	14	168	11.584	0	15	191.455
YOR165W	14	168	6.3869	0	15	212.679
YOR298C-A	14	168	4.28449	0	15	289.635
YOR375C	14	168	4.52288	0	15	344.198
YPL144W	14	168	4.9444	0	16	81.3524
YPL176C	14	168	5.52323	0	16	63.3057
YPL227C	14	168	5.63049	0	16	35.1114
YPR008W	14	168	5.70353	0	16	166.162
YPR040W	14	168	4.01483	0	16	187.714
YPR154W	14	168	8.4996	0	16	242.015
YBL106C	14	168.6	4.25177	0	2	4.13056
YCL057W	14	168.6	14.9481	0	3	11.8713
YCR006C	14	168.6	6.12819	0	3	59.0411
YDL154W	14	168.6	6.76188	0	4	55.259
YDR304C	14	168.6	4.28946	0	4	332.448
YIL020C	14	168.6	7.57855	0	9	141.685
YIR003W	14	168.6	5.26731	0	9	162.434
YJL058C	14	168.6	7.12463	0	10	98.3681
YJL080C	14	168.6	7.66291	0	10	86.7403
YKL043W	14	168.6	6.11394	0	11	135.444
YKL044W	14	168.6	5.72803	0	11	135.282
YLR077W	14	168.6	4.70536	0	12	102.223
YMR163C	14	168.6	7.60461	0	13	199.366
YNL010W	14	168.6	5.71539	0	14	227.051
YNL086W	14	168.6	7.96614	1	14	172.726
YNL138W	14	168.6	11.6782	0	14	135.691
YNL173C	14	168.6	6.01392	0	14	114.742
YAR042W	14	169.6	7.04261	0	1	86.6564
YBL007C	14	169.6	15.413	0	2	64.8812
YBR206W	14	169.6	6.48563	0	2	190.379
YCL044C	14	169.6	5.28122	0	3	23.1989
YDR019C	14	169.6	7.76575	0	4	150.483
YDR168W	14	169.6	4.53736	0	4	245.034
YDR386W	14	169.6	5.13111	0	4	386.287
YEL032W	14	169.6	9.20742	0	5	30.4209
YER035W	14	169.6	5.49399	0	5	77.9369
YER142C	14	169.6	8.84681	0	5	159.638
YFR024C-A	14	169.6	4.23961	0	6	97.566
YGR116W	14	169.6	9.54029	0	7	266.577
YGR125W	14	169.6	7.00522	0	7	274.7
YHL030W	14	169.6	10.9634	0	8	12.0064
YJL002C	14	169.6	10.1379	0	10	130.405
YKR084C	14	169.6	4.72699	0	11	227.42
YLR106C	14	169.6	9.41811	0	12	130.961
YMR190C	14	169.6	5.85875	0	13	219.425
YOL059W	14	169.6	15.5447	0	15	71.6118
YOR267C	14	169.6	11.1387	0	15	272.231
YOR288C	14	169.6	5.6642	0	15	281.527
YBR054W	14	170.6	8.45991	0	2	102.968
YBR127C	14	170.6	6.5829	0	2	147.867
YDL103C	14	170.6	6.54972	0	4	85.7607
YDL226C	14	170.6	7.38513	0	4	16.1402
YDR066C	14	170.6	6.13337	0	4	180.553
YDR325W	14	170.6	4.55487	0	4	346.324
YDR451C	14	170.6	9.1741	0	4	422.279
YDR461C-A	14	170.6	4.87707	0	4	429.589
YEL022W	14	170.6	4.03879	0	5	39.0161
YER122C	14	170.6	7.03507	0	5	141.548
YGL222C	14	170.6	5.62194	0	7	30.0659
YGR146C	14	170.6	4.68228	0	7	290.399
YGR247W	14	170.6	8.28099	0	7	364.433
YIL002C	14	170.6	10.5362	0	9	159.082
YIL125W	14	170.6	13.0068	0	9	55.1792
YIR007W	14	170.6	6.35851	0	9	166.848
YJL014W	14	170.6	7.46612	0	10	122.252
YJL111W	14	170.6	13.2958	0	10	62.3723
YJL194W	14	170.6	6.33189	0	10	20.8048
YJR064W	14	170.6	7.83055	0	10	166.752
YKL149C	14	170.6	4.46235	0	11	64.1567
YKL157W	14	170.6	10.2967	0	11	58.9082
YKL185W	14	170.6	4.46621	0	11	35.8895
YKL196C	14	170.6	11.5332	0	11	28.6964
YLR324W	14	170.6	5.54581	0	12	280.523
YMR149W	14	170.6	4.64178	0	13	190.744
YNL018C	14	170.6	5.38563	0	14	222.649
YNL037C	14	170.6	14.6421	0	14	206.932
YNL287W	14	170.6	14.6738	0	14	34.077
YNR039C	14	170.6	4.27983	0	14	258.798
YOR326W	14	170.6	7.30824	0	15	305.482
YOR344C	14	170.6	8.34128	0	15	322.769
YBL043W	14	171.6	9.07783	0	2	41.0336
YBR053C	14	171.6	4.99224	0	2	102.262
YCR053W	14	171.6	4.62922	0	3	104.031
YDL084W	14	171.6	10.5603	0	4	94.6244
YDL126C	14	171.6	12.9394	0	4	73.974
YDL143W	14	171.6	8.00477	0	4	61.9656
YDL197C	14	171.6	4.05651	0	4	32.9963
YER034W	14	171.6	7.51821	0	5	77.6593
YGL027C	14	171.6	6.86482	0	7	165.093
YGL245W	14	171.6	8.31264	0	7	14.4311
YGR203W	14	171.6	8.03404	0	7	334.954
YHR098C	14	171.6	7.85558	0	8	90.5542
YIR038C	14	171.6	5.49755	0	9	191.049
YJL072C	14	171.6	4.32322	0	10	91.7456
YJL079C	14	171.6	4.17466	0	10	87.206
YJL084C	14	171.6	8.96268	0	10	83.3633
YJL099W	14	171.6	4.31597	0	10	71.8124
YLR343W	14	171.6	11.9861	0	12	293.796
YMR001C	14	171.6	4.25222	0	13	92.1462
YNL097W-A	14	171.6	11.335	1	14	163.343
YNR018W	14	171.6	4.73818	0	14	245.806
YOR142W	14	171.6	5.97477	0	15	195.68
YOR151C	14	171.6	9.12975	0	15	203.47
YPL160W	14	171.6	8.36259	0	16	71.6203
YPR042C	14	171.6	12.9045	0	16	189.558
YAL026C-A	14	172.6	5.28198	0	1	43.1397
YDL030W	14	172.6	4.11063	0	4	123.265
YGL048C	14	172.6	4.76529	0	7	152.198
YGL215W	14	172.6	10.8775	0	7	32.5857
YGR204W	14	172.6	7.6122	0	7	335.212
YHR046C	14	172.6	4.49846	0	8	59.4774
YHR186C	14	172.6	5.34552	0	8	144.206
YJL083W	14	172.6	4.18127	0	10	83.6157
YKL145W-A	14	172.6	4.82022	0	11	66.4813
YLR012C	14	172.6	4.93743	0	12	61.269
YLR027C	14	172.6	5.32464	0	12	71.2949
YLR314C	14	172.6	4.66477	0	12	275.101
YML001W	14	172.6	4.60607	0	13	90.8
YNL034W	14	172.6	5.04414	0	14	211.037
YNL051W	14	172.6	4.92303	0	14	197.508
YNL085W	14	172.6	10.202	1	14	173.032
YNL212W	14	172.6	5.3291	0	14	91.5359
YNL267W	14	172.6	6.50744	0	14	52.146
YOR157C	14	172.6	6.52645	0	15	208.445
YOR362C	14	172.6	6.27904	0	15	336.192
YPR002W	14	172.6	10.2998	0	16	161.916
YAL040C	14	173.6	10.5551	0	1	30.3961
YAR028W	14	173.6	4.88459	0	1	83.179
YBL063W	14	173.6	7.46388	0	2	30.5742
YDL048C	14	173.6	4.22792	0	4	114.151
YDR135C	14	173.6	4.2218	0	4	225.568
YDR338C	14	173.6	4.69716	0	4	356.357
YDR348C	14	173.6	5.14197	0	4	363.27
YDR506C	14	173.6	12.7321	0	4	453.048
YGL194C-A	14	173.6	4.24662	0	7	51.8211
YGL207W	14	173.6	6.02182	0	7	36.6571
YGR231C	14	173.6	4.38687	0	7	352.812
YHR135C	14	173.6	7.19344	0	8	112.321
YIL047C	14	173.6	7.39272	0	9	120.489
YJL008C	14	173.6	5.8316	0	10	126.497
YJL129C	14	173.6	4.95869	0	10	53.2202
YKL101W	14	173.6	12.5319	0	11	94.4367
YKL210W	14	173.6	13.1211	0	11	14.9098
YLR192C	14	173.6	4.06459	0	12	194.285
YML126C	14	173.6	6.65375	0	13	6.95502
YNL049C	14	173.6	4.64807	0	14	199.387
YNL106C	14	173.6	4.45615	1	14	157.062
YOL098C	14	173.6	5.84107	0	15	44.8344
YOL133W	14	173.6	7.56787	0	15	23.1958
YOR117W	14	173.6	8.01585	0	15	179.859
YPL014W	14	173.6	6.82568	0	16	152.964
YAL034C	14	174.6	5.22074	0	1	36.9032
YBL022C	14	174.6	4.86536	0	2	54.3913
YBL064C	14	174.6	5.77598	0	2	30.3548
YBR046C	14	174.6	5.71835	0	2	99.4846
YCL002C	14	174.6	4.77299	0	3	53.543
YCR021C	14	174.6	11.585	0	3	75.4232
YCR088W	14	174.6	7.87829	0	3	127.226
YDL029W	14	174.6	4.96882	0	4	123.826
YDL130W-A	14	174.6	4.96527	0	4	71.0201
YDR042C	14	174.6	5.65585	0	4	167.807
YEL063C	14	174.6	5.39866	0	5	11.6936
YER165W	14	174.6	5.28475	0	5	178.62
YGL201C	14	174.6	4.35972	0	7	44.7721
YJL068C	14	174.6	6.29301	0	10	94.1685
YKL103C	14	174.6	8.0503	0	11	93.9659
YLR437C	14	174.6	5.29709	0	12	364.32
YLR447C	14	174.6	6.1362	0	12	370.038
YML124C	14	174.6	4.23286	0	13	7.91569
YMR012W	14	174.6	15.4938	0	13	98.9461
YMR186W	14	174.6	5.28953	0	13	215.029
YNL090W	14	174.6	5.4031	1	14	168.987
YOL049W	14	174.6	8.32379	0	15	78.7184
YOL085W-A	14	174.6	4.01695	0	15	53.3169
YPL036W	14	174.6	4.59967	0	16	139.991
YPR011C	14	174.6	5.22721	0	16	169.36
YPR108W	14	174.6	7.73297	0	16	215.346
YBL041W	14	175.6	4.17238	0	2	42.4037
YDL218W	14	175.6	4.38612	0	4	20.5853
YDR409W	14	175.6	8.92424	0	4	399.696
YEL024W	14	175.6	4.51133	0	5	37.5554
YER025W	14	175.6	4.41573	0	5	71.8482
YHR027C	14	175.6	4.53561	0	8	49.3765
YHR200W	14	175.6	6.33298	0	8	149.745
YJR148W	14	175.6	6.39596	0	10	211.699
YKR100C	14	175.6	4.58072	0	11	243.062
YLR064W	14	175.6	6.94977	0	12	95.5866
YLR249W	14	175.6	4.26192	0	12	229.223
YMR063W	14	175.6	4.47155	0	13	134.978
YMR226C	14	175.6	4.84266	0	13	245.592
YMR306W	14	175.6	6.0966	0	13	299.61
YNL071W	14	175.6	12.5161	1	14	182.37
YOL007C	14	175.6	8.63018	0	15	103.072
YBR170C	14	176.6	6.64367	0	2	173.415
YCR008W	14	176.6	5.28912	0	3	61.6674
YDR204W	14	176.6	4.06074	0	4	266.014
YDR352W	14	176.6	5.40642	0	4	366.354
YGL094C	14	176.6	6.55368	0	7	123.78
YGR087C	14	176.6	8.36806	0	7	241.573
YGR244C	14	176.6	8.64907	0	7	362.349
YGR260W	14	176.6	4.26087	0	7	374.606
YIL010W	14	176.6	11.2411	0	9	150.738
YJL134W	14	176.6	4.95311	0	10	47.4966
YKL065C	14	176.6	4.47921	0	11	120.352
YKR018C	14	176.6	10.8874	0	11	180.676
YNL073W	14	176.6	11.5921	1	14	181.169
YOR293W	14	176.6	4.84287	0	15	286.147
YPL020C	14	176.6	4.5723	0	16	149.084
YPL162C	14	176.6	4.82133	0	16	70.7597
YPR103W	14	176.6	6.90742	0	16	212.414
YPR105C	14	176.6	7.94808	0	16	214.51
Q0120	14	177.6	7.07583	0	17	NA
Q0275	14	177.6	6.39373	0	17	NA
YDR247W	14	177.6	5.65012	0	4	296.327
YER164W	14	177.6	4.80355	0	5	176.88
YGR068C	14	177.6	5.0898	0	7	231.992
YGR249W	14	177.6	5.60983	0	7	365.571
YIL009C-A	14	177.6	6.90765	0	9	151.213
YKR001C	14	177.6	14.2432	0	11	168.082
YML007W	14	177.6	7.57461	0	13	86.2722
YML027W	14	177.6	4.4345	0	13	75.2491
YMR199W	14	177.6	6.02268	0	13	225.322
YMR237W	14	177.6	4.82935	0	13	252.839
YNL080C	14	177.6	6.3377	1	14	177.205
YNL240C	14	177.6	6.31531	0	14	73.9902
YOR245C	14	177.6	4.31158	0	15	262.48
YBR106W	14	178.6	6.17713	0	2	135.796
YDR238C	14	178.6	4.84203	0	4	291.615
YFR050C	14	178.6	4.79432	0	6	119.953
YGR023W	14	178.6	4.95357	0	7	195.866
YLR299W	14	178.6	7.01534	0	12	261.386
YMR232W	14	178.6	7.23268	0	13	250.523
YOL027C	14	178.6	4.34416	0	15	90.3243
YOR269W	14	178.6	4.77247	0	15	272.731
YPL127C	14	178.6	4.58418	0	16	89.8203
Q0297	14	179.6	4.61029	0	17	NA
YBR200W	14	179.6	4.1089	0	2	186.253
YGR036C	14	179.6	5.18269	0	7	206.807
YHR157W	14	179.6	4.55656	0	8	123.913
YMR095C	14	179.6	6.72939	0	13	155.704
YMR315W	14	179.6	7.00804	0	13	306.976
YOL090W	14	179.6	4.63018	0	15	48.6445
YOR303W	14	179.6	4.70577	0	15	291.355
YPL141C	14	179.6	4.57533	0	16	82.9751
Q0075	14	180.6	5.18357	0	17	NA
YBR238C	14	180.6	6.26105	0	2	209.224
YCL051W	14	180.6	6.04821	0	3	17.1982
YER143W	14	180.6	4.69853	0	5	159.737
YGR191W	14	180.6	8.91734	0	7	325.753
YHR158C	14	180.6	4.01643	0	8	125.191
YHR190W	14	180.6	4.26336	0	8	145.462
YIL071W-A	14	180.6	4.75098	0	9	102.801
YIL172C	14	180.6	4.56129	0	9	8.33379
YJL041W	14	180.6	8.68319	0	10	109.74
YJL164C	14	180.6	4.26689	0	10	33.3541
YJL167W	14	180.6	5.72179	0	10	31.5045
YJR149W	14	180.6	4.34833	0	10	212.122
YKL027W	14	180.6	5.26579	0	11	147.16
YKL142W	14	180.6	4.02134	0	11	67.8304
YMR002W	14	180.6	5.47406	0	13	92.5054
YMR275C	14	180.6	12.4241	0	13	278.29
YMR302C	14	180.6	4.08066	0	13	296.702
YOR323C	14	180.6	4.57991	0	15	304.553
YBR078W	14	181.6	5.58774	0	2	117.921
YCR082W	14	181.6	4.57111	0	3	124.261
YDR182W-A	14	181.6	4.49254	0	4	257.065
YKR002W	14	181.6	4.23396	0	11	168.275
YMR181C	14	181.6	5.03119	0	13	212.209
YMR274C	14	181.6	3.9803	0	13	277.177
YNL289W	14	181.6	6.96305	0	14	32.5625
YOL123W	14	181.6	4.38664	0	15	28.9938
YER136W	14	182.6	4.99903	0	5	153.903
YGL252C	14	182.6	4.48583	0	7	10.1522
YGR108W	14	182.6	6.75006	0	7	260.35
YOR188W	14	182.6	4.14708	0	15	226.307
YGR238C	14	183.6	4.44046	0	7	358.425
YMR304C-A	14	183.6	6.01449	0	13	298.919
YMR305C	14	183.6	5.02823	0	13	299.294
YDR111C	14	184.6	4.40139	0	4	210.751
YDR246W-A	14	184.6	4.27721	0	4	296.054
YKL168C	14	185.6	4.17425	0	11	50.7203
YKL212W	14	186.6	5.08162	0	11	13.1587
YKR003W	14	186.6	5.57319	0	11	169.09
YOR350C	14	186.6	5.29053	0	15	328.316
YDR394W	14	187.6	4.35137	0	4	391.123
YDL138W	14	188.8	4.18373	0	4	66.1003
YDR207C	14	188.8	4.12269	0	4	268.912
YGL013C	14	188.8	5.58572	0	7	174.776
YNL058C	14	188.8	4.49944	1	14	191.803
YOR197W	14	188.8	6.28933	0	15	236.649
YPR029C	14	188.8	4.43772	0	16	181.813
YDR372C	14	189.6	7.05536	0	4	378.862
YMR316C-B	14	192.6	5.37859	0	13	308.618
YNL311C	14	192.6	4.01154	0	14	19.1361
YBR149W	14	193.6	4.61563	0	2	162.025
YER079W	14	193.6	3.9654	0	5	111.645
YJL001W	14	193.6	4.46185	0	10	130.56
Q0255	14	194.6	4.10629	0	17	NA
YBL005W	14	194.6	5.05306	0	2	65.2128
YBR056W	14	195.6	5.86729	0	2	104.399
YMR096W	14	195.6	4.9722	0	13	155.856
YJL216C	14	197.6	4.99991	0	10	7.85579
YOR227W	14	198.6	4.06298	0	15	251.747
YCR026C	14	199.6	5.93535	0	3	79.8553
YGR008C	14	200.6	4.49547	0	7	188.137
YNL056W	14	203.6	5.08474	1	14	191.994
YPR067W	14	203.6	4.35143	0	16	197.846
YGL211W	14	204.6	4.0851	0	7	34.2677
YML118W	14	205.6	6.2311	0	13	10.9698
YNL033W	14	205.6	5.15419	1	14	211.971
YNL019C	14	206.6	6.57071	1	14	221.705
YNL016W	14	211.6	7.27523	1	14	223.07
YLR248W	14	217.6	4.14426	0	12	228.314
YKR071C	14	221.6	7.10864	0	11	218.692
YLR072W	14	255.8	4.01772	0	12	100.418
YML035C	14	264.6	4.32396	0	13	70.9888
YPR059C	14	265.6	4.00433	0	16	195.661
YBR286W	14	270.6	4.80674	0	2	232.394
YKR017C	14	270.6	4.31345	0	11	179.708
YGR188C	14	271.6	4.52229	0	7	323.785
YNR055C	14	271.6	4.20233	1	14	270.158
YDR514C	14	272.6	4.00053	0	4	456.601
YJR108W	14	272.6	4.40323	0	10	188.604
YDR183W	14	273.6	4.54802	0	4	257.199
YOL017W	14	273.6	6.31142	0	15	96.5279
YOR053W	14	273.6	5.28407	0	15	141.159
YJR144W	14	274.6	4.27316	0	10	210.243
YBL107C	14	275.5	4.21218	0	2	3.1321
YDL097C	14	275.5	4.18577	0	4	88.8891
YNR061C	14	275.5	11.9067	1	14	275.09
YOR261C	14	275.5	4.13124	0	15	269.612
YPL077C	14	275.5	4.20823	0	16	118.927
YPR160C-A	15	16.1	4.82234	0	16	250.206
YOL132W	15	21.1	6.11874	1	15	23.5186
YOL122C	15	32.1	7.17998	1	15	30.1737
YEL014C	15	39.1	3.96722	0	5	45.0498
YDL013W	15	40.1	4.24639	0	4	133.032
YDR377W	15	40.1	4.93024	0	4	380.867
YML081C-A	15	41.1	4.08269	0	13	35.4367
YOL131W	15	41.1	6.18038	1	15	24.0917
YOL142W	15	41.1	5.15618	0	15	18.3061
YOR042W	15	41.1	4.38514	0	15	134.761
YPL017C	15	41.1	4.14036	0	16	150.841
YBR177C	15	44.1	7.05264	0	2	175.83
YOL146W	15	45.1	6.52603	0	15	16.0897
YOL102C	15	46.1	7.94008	1	15	41.8147
YHR179W	15	47.1	7.9594	0	8	138.749
YOL087C	15	47.1	4.22195	1	15	52.349
YDR517W	15	48.1	5.17622	0	4	457.917
YLR460C	15	48.1	6.2289	0	12	381.922
YOL036W	15	48.1	4.11157	0	15	84.7119
YOL076W	15	48.1	5.40307	1	15	61.6879
YCR102C	15	49.2	7.49345	0	3	146.607
YKL211C	15	49.2	4.31688	0	11	14.527
YLL028W	15	49.2	13.6384	0	12	30.4843
YLR301W	15	49.2	5.40716	0	12	263.103
YOL078W	15	49.2	5.30337	1	15	59.9304
YOL092W	15	49.2	7.03301	1	15	47.5956
YPL171C	15	49.2	5.45855	0	16	65.922
YGL133W	15	51.1	4.52456	0	7	95.3629
YOL089C	15	52.1	24.1184	1	15	50.6557
YHL019C	15	53.1	4.60918	0	8	20.8665
YBR255W	15	54.1	4.2921	0	2	217.374
YGL212W	15	55.1	4.54504	0	7	33.8672
YGL203C	15	58.1	4.51736	0	7	42.4628
YOL060C	15	59.1	5.53704	1	15	71.2848
YPR097W	15	59.1	4.18398	0	16	210.392
YOL072W	15	60.1	4.35913	1	15	64.302
YOL082W	15	62.1	6.98475	1	15	55.6685
YGR293C	15	73.1	4.85639	0	7	399.719
[truncated: 110 more rows]

## Sheet: MS Basal
UID	peaks.chr	peaks.pos	peaks.lod	cis (+/- 20 cM)	trait.chr	trait.pos
YAR073W	1	12.7	5.14399	0	1	102.461
YAL061W	1	12.7	6.74174	1	1	15.0326
YAL062W	1	12.7	6.96496	1	1	14.1844
YAL067C	1	12.7	8.48125	1	1	4.0329
YAL065C	1	12.7	9.83806	1	1	5.35373
YAL064W-B	1	12.7	16.446	1	1	5.39648
YAL056W	1	15.7	7.82666	1	1	17.6528
YAR066W	1	27.7	3.42776	0	1	99.4494
YAR023C	1	77.7	5.99643	1	1	80.8982
YAR031W	1	78.7	6.16275	1	1	84.0538
YAR035W	1	79.7	10.5661	1	1	85.5646
YAR033W	1	79.7	10.875	1	1	84.6258
YAR030C	1	80.7	11.81	1	1	84.0615
YAR027W	1	81.7	13.0487	1	1	82.674
YAR029W	1	82.7	12.1563	1	1	83.8221
YAR028W	1	82.7	13.3626	1	1	83.179
YAR053W	1	87.7	7.59258	1	1	93.7421
YAR050W	1	87.7	8.24742	1	1	91.5081
YAR047C	1	87.7	12.3106	1	1	90.7818
YAL063C	1	87.7	12.341	0	1	12.5618
YDL037C	1	31.7	3.70891	0	4	119.551
YDL039C	1	32.7	4.39147	0	4	119.083
YDR203W	1	60.7	4.23989	0	4	265.874
YER015W	1	12.7	3.97326	0	5	64.6088
YFL020C	1	80.7	4.3104	0	6	47.7785
YGL205W	1	12.7	3.34918	0	7	40.0562
YGR266W	1	38.2	3.35283	0	7	378.37
YGL051W	1	78.7	10.2019	0	7	149.387
YHR216W	1	12.7	4.85063	0	8	166.363
YHR214W	1	27.7	3.33535	0	8	162.538
YIL160C	1	12.7	4.38021	0	9	18.6309
YIR033W	1	18.7	3.87318	0	9	187.273
YKL188C	1	23.7	3.91377	0	11	33.7191
YKL182W	1	25.7	3.74198	0	11	38.2388
YLR237W	1	85.7	3.38464	0	12	220.453
YMR246W	1	13.7	3.28747	0	13	258.288
YML058W-A	1	37.7	3.64397	0	13	53.9898
YMR182C	1	38.2	3.66962	0	13	212.58
YNR016C	1	25.7	4.7989	0	14	244.735
YOR364W	1	12.7	3.31533	0	15	337.716
YOR273C	1	12.7	3.54086	0	15	276.042
YOR363C	1	12.7	6.81272	0	15	337.663
YOL101C	1	18.7	5.05001	0	15	42.221
YPR128C	1	12.7	4.81683	0	16	229.758
YBL101C	2	10.1	12.6657	1	2	8.45681
YBL105C	2	11.1	5.51247	1	2	5.27572
YBL098W	2	17.1	3.70253	1	2	11.7131
YBL055C	2	33.1	6.10015	1	2	35.0653
YBL044W	2	39.1	8.60619	1	2	40.8262
YBL043W	2	40.1	7.51784	1	2	41.0336
YBR021W	2	42.1	5.21117	0	2	84.4369
YBL018C	2	59.1	4.36193	1	2	55.909
YBR001C	2	68.1	3.43636	1	2	72.3687
YBR006W	2	86.1	7.76136	1	2	74.0898
YBR013C	2	86.1	14.4677	1	2	79.7597
YBL011W	2	90.1	5.38415	0	2	61.0464
YBR026C	2	91.1	9.36196	1	2	88.2167
YBR067C	2	103.4	3.63769	1	2	111.828
YBR087W	2	113.1	10.279	1	2	127.112
YBR062C	2	115.1	3.47165	1	2	109.965
YBR077C	2	119.1	4.42314	1	2	117.673
YBR218C	2	121.2	3.29724	0	2	198.689
YBR242W	2	121.2	3.85194	0	2	211.438
YBR107C	2	128.1	18.1547	1	2	136.359
YBR111C	2	132.1	3.62948	1	2	138.565
YBR103W	2	133.1	14.651	1	2	134.308
YBR119W	2	138.1	5.62323	1	2	143.815
YBR137W	2	144.1	3.71052	1	2	153.945
YBR094W	2	147.1	8.97482	1	2	129.598
YBR132C	2	153.1	5.74367	1	2	150.458
YBR150C	2	163.1	6.86527	1	2	163.372
YBL095W	2	164.1	3.57918	0	2	12.9552
YBR149W	2	164.1	5.74904	1	2	162.025
YBR084W	2	166.1	3.4408	0	2	123.292
YBR144C	2	168.1	5.97656	1	2	160.101
YBR214W	2	172.1	3.50003	0	2	195.433
YBR151W	2	173.1	12.4016	1	2	163.532
YBR158W	2	174.1	8.24799	1	2	166.977
YBR203W	2	175.1	9.13182	1	2	188.746
YBR201W	2	177.1	7.26069	1	2	187.066
YBR196C-A	2	177.5	5.15098	1	2	184.24
YBR197C	2	177.5	12.1997	1	2	184.745
YBR196C-B	2	180.1	3.61983	1	2	184.377
YBR176W	2	187.1	3.94143	1	2	175.1
YBR136W	2	189.1	5.95347	0	2	151.728
YBR235W	2	194.1	3.48147	1	2	206.098
YBR123C	2	196.3	3.43047	0	2	146.025
YBR234C	2	200.1	3.9323	1	2	206.005
YBR272C	2	202.1	3.4038	0	2	224.353
YBR229C	2	204.1	3.97096	1	2	203.789
YBR297W	2	233.8	4.54917	1	2	240.135
YCL046W	2	10.1	3.4066	0	3	22.3712
YCL040W	2	10.1	3.58972	0	3	24.3866
YCR064C	2	140	3.39683	0	3	109.695
YDR038C	2	61.1	3.76049	0	4	164.556
YDR170W-A	2	61.1	5.93262	0	4	249.023
YDR039C	2	62.1	3.68133	0	4	165.762
YDL049C	2	119.1	3.62044	0	4	113.424
YDR043C	2	170.1	3.73432	0	4	168.476
YDL022W	2	177.5	3.74297	0	4	127.695
YER035W	2	166.1	3.64751	0	5	77.9369
YER124C	2	177.5	8.89456	0	5	143.202
YER152C	2	180.1	5.5397	0	5	165.909
YEL014C	2	196.3	3.3454	0	5	45.0498
YGR138C	2	174.1	4.31061	0	7	283.293
YGL028C	2	176.1	8.28384	0	7	163.897
YGR041W	2	177.5	10.4428	0	7	213.687
YGL013C	2	184.1	4.94949	0	7	174.776
YHR055C	2	170.1	4.38267	0	8	64.4249
YHR053C	2	172.1	4.07157	0	8	63.8237
YHR143W	2	176.1	8.3011	0	8	115.689
YHL028W	2	213.1	3.44854	0	8	14.6163
YIL111W	2	10.1	3.49903	0	9	69.8279
YIL101C	2	10.1	5.34195	0	9	79.7311
YIL099W	2	114.1	4.25611	0	9	80.0701
YJL078C	2	177.5	9.63958	0	10	88.1709
YJL222W-A	2	230.1	3.41173	0	10	2.86695
YKL027W	2	105.1	3.40057	0	11	147.16
YKL093W	2	176.1	3.68232	0	11	100.472
YKR100C	2	177.5	3.39738	0	11	243.062
YLR297W	2	93.1	3.47345	0	12	260.655
YLR217W	2	165.1	3.37328	0	12	206.29
YLR286C	2	176.1	7.77695	0	12	255.634
YLR353W	2	180.1	3.7743	0	12	300.379
YMR090W	2	10.1	3.51644	0	13	152.737
YMR105C	2	10.1	3.65505	0	13	162.391
YML128C	2	10.1	3.88673	0	13	5.64274
YML100W	2	10.1	3.96483	0	13	24.0173
YMR196W	2	10.1	4.78761	0	13	222.755
YML002W	2	111.1	3.33872	0	13	89.9054
YMR016C	2	124.1	6.93002	0	13	103.864
YMR288W	2	176.1	3.62008	0	13	287.483
YNL270C	2	147.1	3.54898	0	14	50.9569
YNL062C	2	154.1	3.50844	0	14	189.477
YNL327W	2	168.1	6.71382	0	14	8.89106
YNL066W	2	175.1	7.2944	0	14	186.195
YNR067C	2	175.1	10.7398	0	14	280.846
YNR063W	2	177.5	3.41657	0	14	276.349
YOR316C-A	2	171.1	11.0552	0	15	299.614
YOR264W	2	172.1	7.24249	0	15	270.251
YPR026W	2	10.1	3.5399	0	16	178.451
YPR160W	2	10.1	3.58547	0	16	249.753
YPL017C	2	10.1	3.86263	0	16	150.841
YPR106W	2	175.1	8.5532	0	16	214.653
YPR156C	2	177.5	4.0334	0	16	243.521
YPR105C	2	177.5	8.6512	0	16	214.51
YPR054W	2	182.1	3.66541	0	16	193.219
YBL031W	3	43.9	4.81917	0	2	48.5393
YBR114W	3	137	3.719	0	2	140.181
YCL024W	3	43.9	5.45878	1	3	37.9848
YCL026C-B	3	43.9	6.6748	1	3	35.4998
YCL017C	3	43.9	7.27736	1	3	45.2389
YCL021W-A	3	43.9	13.1091	1	3	40.125
YCL012C	3	48.9	4.56922	1	3	48.776
YCL004W	3	51.9	4.99197	1	3	52.3655
YCR024C-B	3	56.9	3.45566	0	3	78.1875
YCR018C	3	74.8	13.8997	1	3	71.4833
YCR043C	3	87.9	4.21912	1	3	99.2052
YCR052W	3	95.9	6.01311	1	3	103.214
YCR087C-A	3	135.9	4.37988	1	3	126.938
YCR087W	3	137	3.91442	1	3	126.703
YDR240C	3	43.9	3.38989	0	4	292.959
YDL141W	3	43.9	3.62574	0	4	62.9077
YDL197C	3	43.9	4.22142	0	4	32.9963
YDR233C	3	55.9	4.86491	0	4	288.372
YEL001C	3	43.9	3.38948	0	5	52.8847
YFR036W	3	43.9	3.61468	0	6	108.95
YGR282C	3	43.9	3.92295	0	7	391.719
YGL200C	3	46.9	4.62256	0	7	45.6595
YHR025W	3	43.9	3.33149	0	8	47.7984
YHR129C	3	53.9	3.54269	0	8	109.266
YJR117W	3	44.9	3.79772	0	10	192.605
YKR030W	3	43.9	3.55346	0	11	189.933
YKL112W	3	43.9	3.8241	0	11	85.937
YKL209C	3	74.8	3.54789	0	11	17.6129
YLR209C	3	43.9	3.52215	0	12	202.27
YLL027W	3	58.9	4.03838	0	12	31.4198
YNL145W	3	74.8	3.6331	0	14	130.411
YOR144C	3	43.9	3.85188	0	15	199.65
YOR268C	3	137	3.36356	0	15	272.582
YPR176C	3	43.9	3.3686	0	16	258.714
YPR034W	3	43.9	3.70247	0	16	185.457
YPR186C	3	43.9	3.94066	0	16	264.23
YBL030C	4	62.3	4.2554	0	2	49.2263
YBR185C	4	64.3	3.54055	0	2	179.968
YBL045C	4	66.3	4.07035	0	2	40.6814
YBL099W	4	91.3	4.60855	0	2	11.0842
YBR153W	4	327.3	3.4254	0	2	164.259
YBL111C	4	464.3	3.2876	0	2	1.20149
YBL113C	4	464.6	3.83176	0	2	0.764066
YCL064C	4	174.3	4.2512	0	3	8.08501
YDL011C	4	9.3	3.74022	0	4	134.135
YDL207W	4	24.3	4.4143	1	4	27.3384
YDL214C	4	27.7	5.54812	1	4	23.7056
YDR096W	4	61.3	4.31328	0	4	197.531
YDL132W	4	69.3	6.37529	1	4	69.5057
YDL133W	4	70.3	4.52127	1	4	68.9216
YDR529C	4	70.3	5.24113	0	4	463.911
YDL124W	4	71.3	4.40329	1	4	74.4703
YDL181W	4	74.3	4.10544	0	4	41.8908
YDL109C	4	79.3	5.98011	1	4	82.8537
YDR322C-A	4	89.3	3.47273	0	4	344.82
YDL008W	4	141.3	10.1234	1	4	134.403
YDL013W	4	141.7	3.78728	1	4	133.032
YDL012C	4	143.3	8.56296	1	4	133.749
YDR001C	4	146.3	5.62339	1	4	140.277
YDR033W	4	148.3	9.48513	1	4	157.556
YDR042C	4	162.3	4.3331	1	4	167.807
YDR038C	4	163.3	15.3091	1	4	164.556
YDR039C	4	164.3	15.0546	1	4	165.762
YDR058C	4	177.3	5.46445	1	4	176.295
YDR079C-A	4	180.9	3.7639	1	4	187.174
YDR089W	4	180.9	4.17199	1	4	192.861
YDR124W	4	211.3	9.61293	1	4	217.123
YDR134C	4	242.3	8.49529	1	4	223.686
YDR182W-A	4	255.7	9.33725	1	4	257.065
YDR273W	4	288.3	4.238	0	4	313.14
YDR265W	4	291.3	8.35966	1	4	309.629
YDR264C	4	292.3	12.4747	1	4	309.461
YDR263C	4	292.3	14.617	1	4	308.595
YDR262W	4	294.3	7.31634	1	4	307.85
YDR136C	4	314.5	3.80253	0	4	225.795
YDR268W	4	315.3	4.95606	1	4	311.224
YDR272W	4	320.3	13.1101	1	4	312.778
YDR286C	4	324.3	5.00216	1	4	321.002
YDR294C	4	327.3	5.36767	1	4	326.154
YDR329C	4	331.3	3.43153	1	4	349.583
YDR304C	4	331.6	3.34438	1	4	332.448
YDR317W	4	347.3	8.53166	1	4	341.672
YDR364C	4	365.3	5.03136	1	4	373.298
YDR357C	4	368.7	5.97693	1	4	368.756
YDR367W	4	368.7	6.14261	1	4	375.977
YDR366C	4	371.3	5.9642	1	4	375.973
YDR373W	4	376.3	11.8782	1	4	379.052
YDR405W	4	393.3	3.77145	1	4	396.06
YDR444W	4	402.3	3.81502	1	4	418.581
YDR440W	4	423.3	4.12225	1	4	416.157
YDR451C	4	425.4	6.83886	1	4	422.279
YDR441C	4	432.3	4.85455	1	4	416.956
YDR497C	4	446.2	4.5429	1	4	448.054
YDR545W	4	463.3	3.83925	1	4	473.139
YDR540C	4	464.6	4.19376	1	4	470.459
YDR531W	4	464.6	6.4966	1	4	464.433
YDR539W	4	464.6	9.56567	1	4	468.73
YEL050C	4	61.3	3.57674	0	5	21.2834
YEL024W	4	66.6	5.06667	0	5	37.5554
YER028C	4	66.6	5.98223	0	5	74.168
YER038C	4	322.3	3.31631	0	5	79.9025
YEL032W	4	430.3	4.49072	0	5	30.4209
YEL077C	4	464.6	3.30392	0	5	1.41446
YEL075W-A	4	464.6	3.33792	0	5	1.68499
YFR055W	4	394.3	4.51908	0	6	126.839
YFL066C	4	464.6	3.86923	0	6	1.21715
YGR171C	4	56.3	3.73458	0	7	311.731
YGR055W	4	57.3	3.51917	0	7	221.78
YGL187C	4	64.3	4.03495	0	7	55.5969
YGL191W	4	64.3	4.41719	0	7	53.6141
YGR183C	4	65.3	4.25553	0	7	317.917
YGR204W	4	165.3	3.29908	0	7	335.212
YGR296W	4	464.6	3.33084	0	7	401.391
YHR094C	4	66.6	6.15441	0	8	87.7544
YHR057C	4	289.3	3.3732	0	8	65.6616
YHR192W	4	326.3	3.28917	0	8	146.058
YHL050C	4	464.6	3.69797	0	8	0.538511
YIL074C	4	164.3	3.66039	0	9	100.072
YIL051C	4	172.3	4.67647	0	9	116.192
YJR077C	4	62.3	4.92686	0	10	173.418
YJR121W	4	62.3	5.30957	0	10	194.29
YJR048W	4	66.6	3.66887	0	10	157.899
YJL102W	4	68.3	3.87401	0	10	69.384
YJR113C	4	91.3	4.45454	0	10	191.692
YJR125C	4	326.3	3.73846	0	10	196.799
YKL194C	4	61.3	3.73941	0	11	29.8759
YKL016C	4	62.3	3.92351	0	11	154.908
YKL085W	4	89.3	3.76664	0	11	105.924
YKL148C	4	92.3	4.78895	0	11	65.0291
YKL132C	4	99.3	3.83208	0	11	74.0298
YKL189W	4	242.3	3.39734	0	11	32.172
YKR042W	4	407.9	3.46132	0	11	197.241
YLL062C	4	57.3	3.5601	0	12	6.29835
YLR395C	4	64.3	3.95484	0	12	327.573
YLL041C	4	64.3	4.07905	0	12	19.3719
YLR359W	4	172.3	3.61491	0	12	303.96
YLR142W	4	173.3	4.83955	0	12	153.034
YLR466C-B	4	462.3	7.09368	0	12	385.819
YLR467W	4	464.3	3.89516	0	12	386.106
YLR465C	4	464.3	4.05969	0	12	384.25
YLR463C	4	464.3	4.54628	0	12	384.057
YLL066C	4	464.6	3.67114	0	12	3.35931
YLR466W	4	464.6	3.93423	0	12	384.154
YLL067C	4	464.6	3.95885	0	12	1.36647
YMR011W	4	56.3	3.44074	0	13	97.9071
YMR157C	4	56.3	3.77364	0	13	194.493
YMR145C	4	66.6	4.48928	0	13	189.209
YML120C	4	67.3	4.92652	0	13	10.1087
YML087C	4	90.3	3.36584	0	13	32.4459
YMR120C	4	175.3	3.9147	0	13	173.172
YMR282C	4	321.3	3.9159	0	13	283.915
YMR310C	4	328.3	5.06172	0	13	304.891
YMR048W	4	329.3	3.29794	0	13	124.742
YML133C	4	464.6	3.65518	0	13	1.26074
YNL017C	4	38.3	4.66364	0	14	222.91
YNL083W	4	52.3	3.50177	0	14	174.657
YNL052W	4	65.3	5.66951	0	14	197.173
YNR050C	4	152.3	5.11892	0	14	264.692
YNL214W	4	291.3	3.73752	0	14	90.8546
YNL339C	4	464.6	3.63167	0	14	2.1885
YOR148C	4	39.3	3.81379	0	15	201.004
YOR121C	4	52.3	3.51587	0	15	182.188
YOR286W	4	60.3	3.43275	0	15	280.605
YOR283W	4	66.6	3.48263	0	15	279.673
YOR065W	4	66.6	4.40627	0	15	147.632
YOR208W	4	92.3	3.35697	0	15	242.207
YOR297C	4	326.3	3.8915	0	15	288.856
YOR260W	4	328.3	3.64826	0	15	268.639
YOR396W	4	464.3	3.76853	0	15	358.197
YPR020W	4	62.3	3.32218	0	16	173.952
YPR191W	4	63.3	4.52176	0	16	266.664
YPR010C-A	4	66.6	4.246	0	16	168.929
YPL072W	4	396.3	3.68905	0	16	121.359
YPL283C	4	464.6	3.45284	0	16	1.67518
YBL042C	5	30.6	6.52215	0	2	42.1071
YBR105C	5	37.6	4.43486	0	2	135.589
YBR054W	5	55.6	4.871	0	2	102.968
YBR069C	5	141.6	3.54938	0	2	113.531
YCR108C	5	190.9	4.86591	0	3	151.753
YDR055W	5	39.6	3.60575	0	4	174.698
YDR443C	5	108.8	3.6325	0	4	418.472
YDR259C	5	130.7	6.42069	0	4	302.464
YDR543C	5	190.9	3.46966	0	4	472.709
YEL057C	5	10.6	11.0509	1	5	15.9851
YEL052W	5	23.6	5.85638	1	5	19.7846
YEL042W	5	29.4	3.769	1	5	25.8078
YEL066W	5	29.4	3.83172	0	5	9.31348
YEL037C	5	30.6	4.07352	1	5	28.9006
YER088C	5	34.6	3.55095	0	5	117.328
YEL006W	5	34.6	4.43573	1	5	50.5614
YEL038W	5	36.6	6.70932	1	5	28.1509
YEL021W	5	37.6	5.16793	1	5	40.6823
YER029C	5	60.6	4.03301	1	5	74.6236
YER048W-A	5	90	3.95406	1	5	87.7694
YER060W	5	95.6	5.22303	1	5	96.1205
YER054C	5	105.6	3.8828	1	5	92.3147
YER059W	5	108.8	3.49861	1	5	95.4401
YER107C	5	124.6	5.82311	1	5	131.08
YER097W	5	130.7	8.43527	1	5	124.299
YER119C	5	143.6	3.78427	1	5	140.315
YER139C	5	152.6	6.27562	1	5	157.964
YER150W	5	166.6	4.39647	1	5	163.947
YER185W	5	188.6	4.53504	1	5	195.776
YER186C	5	190.9	6.24585	1	5	196.886
YER188W	5	190.9	7.22757	1	5	198.781
YFL051C	5	130.7	7.37899	0	6	14.6281
YGR108W	5	65.6	3.928	0	7	260.35
YGR230W	5	120.6	3.50921	0	7	352.226
YHR177W	5	55.6	3.71426	0	8	136.981
YIL011W	5	126.6	4.46936	0	9	150.216
YIR019C	5	130.7	4.16743	0	9	177.175
YJL088W	5	138.6	3.55217	0	10	80.6073
YJL132W	5	143.6	3.80461	0	10	48.6121
YJR147W	5	148.5	3.49137	0	10	211.235
YKL216W	5	35.6	12.7542	0	11	9.62085
YKL163W	5	44.6	3.42853	0	11	54.884
YKL036C	5	133.6	3.50516	0	11	140.452
YKL102C	5	159.6	3.95617	0	11	94.2264
YLR420W	5	35.6	9.06705	0	12	346.941
YLR312C	5	114.6	3.70129	0	12	273.194
YNL065W	5	29.4	5.71713	0	14	187.041
YNL160W	5	54.6	3.49539	0	14	124.562
YNL144C	5	121.6	3.34356	0	14	131.379
YNL337W	5	190.9	6.52795	0	14	2.64505
YOL143C	5	37.6	14.0115	0	15	18.1558
YOR092W	5	38.6	5.22184	0	15	163.407
YOL126C	5	38.6	14.2627	0	15	27.366
YOL048C	5	72.6	3.71233	0	15	79.4881
YOL151W	5	135.6	3.96841	0	15	14.378
YPR013C	5	134.6	7.24676	0	16	169.808
YPR140W	5	158.6	3.98572	0	16	236.185
YAR064W	6	30.3	5.12728	0	1	99.0664
YDR459C	6	19.3	3.43345	0	4	428.871
YDR373W	6	22.3	3.5162	0	4	379.052
YDL032W	6	79.8	3.5891	0	4	122.07
YEL020C	6	30.3	3.47725	0	5	42.1328
YFL057C	6	19.3	5.79535	1	6	7.05122
YFL056C	6	19.3	10.1271	1	6	7.37203
YFL053W	6	23.3	6.32698	1	6	11.2102
YFL054C	6	26.3	6.51574	1	6	10.9047
YFL055W	6	28.3	3.38422	0	6	8.12746
YFL052W	6	30.3	3.5521	1	6	13.5197
YFL009W	6	35.3	3.72598	0	6	55.7164
YFL027C	6	45.3	4.20115	1	6	39.2901
YFL021W	6	45.3	7.02855	1	6	46.0367
YFL022C	6	54.3	5.6179	1	6	45.5777
YFR012W	6	85.3	5.87653	1	6	80.5411
YFR026C	6	100.3	5.24687	1	6	98.992
YFR055W	6	104.3	6.72834	0	6	126.839
YFR042W	6	109.3	4.72185	1	6	114.475
YFR054C	6	111.8	4.67353	1	6	124.548
YGL249W	6	100.3	3.87956	0	7	12.234
YGL040C	6	106.3	3.35816	0	7	155.628
YHR213W-B	6	28.3	5.9017	0	8	162.282
YHR213W-A	6	30.3	6.57708	0	8	162.207
YHR046C	6	32.3	3.30401	0	8	59.4774
YIL094C	6	44.3	4.9377	0	9	84.3986
YKL083W	6	111.8	3.473	0	11	106.608
YLR317W	6	19.3	3.53605	0	12	275.647
YNL231C	6	26.3	3.3806	0	14	80.2966
YOR324C	6	26.3	4.15374	0	15	305.257
YOR283W	6	111.8	3.62267	0	15	279.673
YAL017W	7	110.9	3.66708	0	1	54.1017
YAL063C	7	257.9	3.34204	0	1	12.5618
YAL012W	7	280.9	4.18289	0	1	58.8527
YBR166C	7	105.9	3.72856	0	2	171.357
YBR139W	7	113.9	3.35481	0	2	154.732
YBR301W	7	260.9	4.76006	0	2	242.696
YBR092C	7	299.2	3.45075	0	2	128.716
YBL113W-A	7	375.9	3.68069	0	2	0.160431
YBR298C	7	391.5	7.95595	0	2	241.321
YCR107W	7	9.9	3.51634	0	3	150.65
YCR105W	7	10.9	3.69947	0	3	148.337
YCR050C	7	56.9	4.94807	0	3	102.627
YCR057C	7	57.9	3.89732	0	3	107.164
YCR072C	7	64.9	4.57497	0	3	116.334
YCR010C	7	110.9	3.59231	0	3	63.9032
YCR104W	7	291.9	3.57114	0	3	147.728
YCR108C	7	377.9	4.82758	0	3	151.753
YDR436W	7	54.8	3.31114	0	4	413.771
YDR530C	7	59.9	4.05539	0	4	464.289
YDR240C	7	94.9	3.4476	0	4	292.959
YDR411C	7	101.9	3.41192	0	4	401.238
YDR456W	7	103.9	3.50898	0	4	423.929
YDR131C	7	133.9	3.97454	0	4	222.749
YDR492W	7	154.9	4.25121	0	4	444.787
YDL059C	7	283.9	3.45527	0	4	106.922
YDR253C	7	283.9	4.3923	0	4	298.982
YDR544C	7	289.9	4.53684	0	4	472.892
YDR046C	7	299.2	4.08841	0	4	170.7
YDR391C	7	299.2	6.24013	0	4	390.001
YER088W-B	7	88.9	4.06656	0	5	117.586
YER190C-A	7	100	3.28732	0	5	201.349
YEL036C	7	245.9	3.56773	0	5	29.5836
YER091C	7	283.9	5.8652	0	5	119.766
YER043C	7	287.9	5.67008	0	5	83.0074
YER026C	7	296.9	3.4752	0	5	72.9768
YER064C	7	299.9	4.11823	0	5	99.5016
YER190C-B	7	377.9	3.91107	0	5	201.623
YEL077W-A	7	378.9	3.42989	0	5	0.201079
YFR049W	7	42.9	5.01048	0	6	119.308
YFR017C	7	48.9	3.37801	0	6	87.7399
YFL067W	7	100	3.53257	0	6	0.36278
YFR030W	7	284.9	3.7784	0	6	102.385
YFL068W	7	377.9	3.95873	0	6	-0.0132554
YGL252C	7	9.9	6.84463	1	7	10.1522
YGL208W	7	34.6	10.1028	1	7	36.0537
YGL216W	7	46.9	5.73486	1	7	31.4376
YGL204C	7	46.9	7.77401	1	7	41.4792
YGL170C	7	61.9	5.54531	1	7	68.6101
YGR049W	7	136.9	3.55389	0	7	218.79
YGL066W	7	138.9	6.3223	1	7	139.74
YGL056C	7	139.9	8.1331	1	7	147.143
YGL060W	7	139.9	12.8685	1	7	144.349
YGL035C	7	150.9	7.37931	1	7	160.255
YGL053W	7	150.9	13.2365	1	7	148.981
YGL001C	7	155.9	4.18049	0	7	183.742
YGL052W	7	155.9	12.4731	1	7	149.295
YGL027C	7	158.9	3.49395	1	7	165.093
YGL014W	7	162.9	3.85338	1	7	172.495
YGR012W	7	183.9	6.17664	1	7	189.913
YGL006W	7	190.1	3.90647	1	7	179.823
YGR039W	7	196.9	3.53773	1	7	212.727
YGR029W	7	201.9	10.1656	1	7	201.147
YGR038W	7	210.9	5.89838	1	7	207.477
YGR078C	7	234.5	3.41771	1	7	236.904
YGR065C	7	238.9	8.46662	1	7	229.325
YGL125W	7	287.9	5.53948	0	7	100.848
YGR156W	7	289.9	4.32775	1	7	296.189
YGR155W	7	294.9	3.4938	1	7	295.45
YGL196W	7	299.2	3.5714	0	7	48.0928
YGR209C	7	299.2	4.17878	0	7	337.916
YGR158C	7	299.2	4.28521	1	7	298.21
YGR161W-C	7	299.2	4.52383	1	7	299.764
YGR200C	7	324.6	5.36342	1	7	333.854
YGR184C	7	327.9	4.77897	1	7	320.321
YGR201C	7	334.9	3.59001	1	7	334.197
YGR208W	7	339.9	5.35364	1	7	337.418
YGL011C	7	352.9	3.50856	0	7	175.869
YGR275W	7	356.9	3.65409	0	7	386.002
YGR229C	7	360.9	4.78709	1	7	351.859
YGR256W	7	373.9	3.29927	1	7	371.697
YGR296C-B	7	377.9	3.45394	0	7	403.375
YGR262C	7	381.9	3.61696	1	7	376.558
YGR279C	7	384.9	3.34317	1	7	388.475
YGR286C	7	387.9	3.93032	1	7	394.019
YGR287C	7	391.5	4.30263	1	7	395.518
YGR295C	7	391.5	16.7944	1	7	400.601
YGR289C	7	391.5	16.8142	1	7	398.042
YGR290W	7	391.5	19.4057	1	7	397.919
YHR217C	7	21.9	9.63945	0	8	167.157
YHR062C	7	87.9	4.50109	0	8	67.1319
YHR173C	7	121.7	4.2407	0	8	135.354
YHR032W-A	7	253.9	4.21759	0	8	52.5294
YHR183W	7	282.9	3.5355	0	8	141.284
YHL050W-A	7	375.9	3.9678	0	8	0.212564
YHR219C-A	7	376.9	3.67007	0	8	168.549
YHL048W	7	384.9	3.90359	0	8	1.89002
YIL051C	7	59.9	3.33877	0	9	116.192
YIL143C	7	61.9	3.73993	0	9	37.3301
YIL006W	7	91.9	3.3539	0	9	154.87
YIR041W	7	289.9	3.48435	0	9	195.287
YJL225W-A	7	102.9	3.64043	0	10	0.280759
YJR040W	7	104.9	3.44894	0	10	152.334
YJR001W	7	106.9	3.70647	0	10	131.053
YJR010W	7	284.9	3.89411	0	10	136.902
YJR137C	7	285.9	3.61789	0	10	204.977
YJL101C	7	289.9	4.39291	0	10	70.8971
YJL060W	7	292.9	5.15269	0	10	97.0181
YJL212C	7	293.9	9.81332	0	10	10.9028
YJL056C	7	360.9	4.63081	0	10	99.9326
YKR099W	7	52.9	4.52005	0	11	241.498
YKR098C	7	58.9	3.38783	0	11	241.242
YKL125W	7	59.9	3.81104	0	11	78.9704
YKL024C	7	89.9	4.34406	0	11	149.276
YKL182W	7	146.9	4.17213	0	11	38.2388
YKL201C	7	281.9	4.30965	0	11	25.637
YKL001C	7	283.9	3.93207	0	11	166.816
YKR027W	7	296.9	3.69708	0	11	186.547
YKL055C	7	333.9	3.47574	0	11	127.615
YKL187C	7	361.9	3.81247	0	11	34.7617
YKR010C	7	363.9	3.45637	0	11	175.11
YLL066W-B	7	19.9	8.90216	0	12	1.97494
YLL008W	7	26.9	3.48939	0	12	47.3745
YLR356W	7	51.9	3.36418	0	12	302.532
YLR107W	7	97.9	3.66324	0	12	131.097
YLR466C-A	7	100	3.49532	0	12	385.516
YLR060W	7	107.9	3.29303	0	12	93.9723
YLR445W	7	223.9	3.46652	0	12	368.704
YLR303W	7	282.9	4.08412	0	12	263.722
YLR092W	7	286.9	5.31761	0	12	116.517
YLR180W	7	287.9	7.60721	0	12	185.512
YLL062C	7	288.9	3.36228	0	12	6.29835
YLL065W	7	289.9	4.83241	0	12	4.17877
YLR094C	7	294.9	5.43321	0	12	118.567
YLR257W	7	299.9	4.21093	0	12	237.151
YLL066W-A	7	377.9	3.52745	0	12	2.29214
YLL067W-A	7	378.9	3.60076	0	12	0.260414
YLR467C-A	7	378.9	3.86278	0	12	387.915
YMR150C	7	34.6	4.09965	0	13	191.264
YML057W	7	86.9	3.3051	0	13	54.4716
YML043C	7	86.9	3.82058	0	13	65.1891
YML133W-A	7	100	3.77359	0	13	0.51907
YML005W	7	105.9	5.33599	0	13	88.4376
YMR155W	7	108.9	6.06428	0	13	193.308
YMR215W	7	110.9	3.33796	0	13	236.906
YML008C	7	153.9	3.42544	0	13	85.9806
YMR071C	7	290.9	4.54135	0	13	139.807
YMR007W	7	391.5	3.54107	0	13	95.1461
YNL338W	7	21.9	9.151	0	14	2.42158
YNL061W	7	48.9	3.64209	0	14	189.594
YNL055C	7	51.9	3.64849	0	14	192.565
YNL186W	7	56.9	3.87105	0	14	107.104
YNL124W	7	58.9	4.62325	0	14	145.342
YNL162W-A	7	65.9	3.34886	0	14	122.27
YNR041C	7	95.9	3.57966	0	14	259.621
YNL339W-A	7	99.9	3.70718	0	14	0.555404
YNL276C	7	283.9	4.17244	0	14	43.9947
YNL277W	7	287.9	4.43606	0	14	43.4488
YNL337W	7	315.9	4.82443	0	14	2.64505
YNL339W-B	7	375.9	3.38095	0	14	0.265709
YOR119C	7	43.9	3.81639	0	15	181.577
YOL094C	7	131.9	3.84017	0	15	47.0514
YOR104W	7	279.9	3.54368	0	15	170.845
YOR122C	7	291.9	3.78398	0	15	182.373
YOR394W	7	294.9	3.61571	0	15	357.287
YOL166W-A	7	309.9	4.21991	0	15	0.1434
YPL283W-A	7	99.9	3.40531	0	16	0.394799
YPL283W-B	7	100	3.47762	0	16	0.167673
YPL231W	7	147.9	4.75847	0	16	31.4739
YPR167C	7	282.9	4.23207	0	16	254.507
YPR015C	7	283.9	3.98859	0	16	171.386
YPL282C	7	288.9	3.39354	0	16	2.42559
YPR088C	7	351.9	3.83448	0	16	206.799
YPR018W	7	357.9	4.02867	0	16	172.387
Q0144	7	182.9	3.75739	0	17	NA
YAR060C	8	153.3	3.76153	0	1	97.8486
YBL061C	8	39.3	3.41961	0	2	32.2331
YCR054C	8	22.3	4.55929	0	3	105.649
YCR005C	8	37.3	4.84575	0	3	58.7168
YDR181C	8	96.3	3.60768	0	4	256.511
YEL018W	8	75.3	3.45645	0	5	42.5443
YEL063C	8	156	3.37468	0	5	11.6936
YGR278W	8	76.3	3.38976	0	7	387.28
YHL042W	8	8.3	5.28892	1	8	4.67077
YHL043W	8	8.3	6.9116	1	8	4.44087
YHL048W	8	10.3	5.86172	1	8	1.89002
YHL026C	8	12.3	9.77287	1	8	16.2411
YHL047C	8	14.3	3.42074	1	8	3.03383
YHL023C	8	14.3	7.31122	1	8	18.7663
YHL008C	8	24.3	18.8371	1	8	28.3681
YHL007C	8	26.3	4.65296	1	8	29.3938
YHL009C	8	29.3	14.9946	1	8	25.531
YHL006W-A	8	31.3	4.09974	1	8	29.3324
YHR034C	8	47.3	4.34111	1	8	53.3732
YHR033W	8	49.7	8.15088	1	8	52.6356
YHR021W-A	8	49.7	12.5118	1	8	44.742
YHR028C	8	49.7	13.4245	1	8	50.1941
YHR058C	8	63.3	7.83585	1	8	65.973
YHR054W-A	8	64.9	5.33983	1	8	64.3617
YHR052W-A	8	64.9	6.53438	1	8	63.7605
YHR106W	8	89.3	4.78655	1	8	97.6716
YHR143W-A	8	114.3	3.33922	1	8	116.207
YHR154W	8	121.2	3.90563	1	8	120.938
YHR157W	8	128.3	4.26408	1	8	123.913
YHR211W	8	156	8.25542	1	8	157.658
YIR044C	8	8.3	5.57027	0	9	197.2
YIL157C	8	110.3	3.33259	0	9	21.3721
YJR025C	8	24.3	3.79473	0	10	141.533
YJR052W	8	85.3	3.33798	0	10	159.613
YJR060W	8	121.2	3.47314	0	10	164.61
YJR061W	8	123.3	3.71373	0	10	165.135
YLR237W	8	49.7	3.60672	0	12	220.453
YLR425W	8	100.3	3.57828	0	12	353.825
YML066C	8	27.4	3.43382	0	13	48.1447
YNL316C	8	105.3	3.33896	0	14	15.9424
YNL272C	8	156	3.81533	0	14	47.7863
YOR068C	8	19.3	3.38257	0	15	149.868
YOR390W	8	91.3	3.30766	0	15	355.329
YOL020W	8	99.3	3.55146	0	15	94.4308
YPL147W	8	14.3	4.20639	0	16	79.2517
YPL123C	8	17.3	4.53886	0	16	92.5362
YPL188W	8	18.3	4.15231	0	16	55.488
YPL116W	8	19.3	3.3267	0	16	95.6328
YPL106C	8	19.3	3.67257	0	16	102.201
YPL167C	8	19.3	3.67843	0	16	68.7498
YPL145C	8	20.3	3.51955	0	16	81.1253
YPL117C	8	21.3	3.3498	0	16	95.3789
YPL127C	8	21.3	4.20402	0	16	89.8203
YPL218W	8	23.3	3.59915	0	16	40.2065
YPL118W	8	24.3	3.4651	0	16	94.7698
YPL098C	8	29.3	3.59801	0	16	105.809
YPL234C	8	34.3	3.39459	0	16	30.5404
YPL271W	8	35.3	4.6309	0	16	8.70622
YAR068W	9	13.9	10.0366	0	1	100.06
YCR069W	9	37.9	3.82768	0	3	114.753
YER076C	9	42.9	3.47132	0	5	109.751
YGL259W	9	176.9	8.44267	0	7	3.11632
YHR214W-A	9	14.9	9.91982	0	8	162.945
YIL173W	9	13.9	3.6509	1	9	5.15574
YIL158W	9	13.9	4.51365	1	9	20.7693
YIL166C	9	13.9	11.6645	1	9	14.6399
YIL167W	9	20.9	4.49937	1	9	13.2231
YIL163C	9	30.9	3.70235	1	9	16.7464
YIL146C	9	45.9	9.2157	1	9	34.0629
YIL151C	9	46.9	7.07045	1	9	27.2844
YIL128W	9	51.9	4.11025	1	9	51.1788
YIL130W	9	53.9	7.60877	1	9	46.2141
YIL120W	9	70.9	8.92225	1	9	60.4596
YIL116W	9	70.9	11.2565	1	9	64.2925
YIL100W	9	89.9	4.65631	1	9	79.7864
YIL087C	9	95.9	11.3182	1	9	90.0124
YIL084C	9	97.9	7.094	1	9	91.4241
YIL089W	9	98.7	7.70972	1	9	87.9803
YIL082W-A	9	102.9	3.46133	1	9	92.4923
YIL072W	9	104.9	4.59759	1	9	101.924
YIL060W	9	112.9	3.59452	1	9	110.837
YIL046W-A	9	113.9	4.83899	1	9	120.708
YIL059C	9	113.9	8.02428	1	9	111.072
YIL046W	9	116.9	5.27688	1	9	120.862
YIL033C	9	122.9	3.51131	1	9	131.239
YIL036W	9	133.9	3.3204	1	9	128.53
YIL014W	9	136.9	8.17991	1	9	146.776
YIL014C-A	9	140.9	9.08809	1	9	146.516
YIL010W	9	146.9	4.23831	1	9	150.738
YIR016W	9	166.9	4.06386	1	9	172.209
YIR026C	9	175.9	4.83846	1	9	182.702
YIR019C	9	179.9	3.50024	1	9	177.175
YIR039C	9	179.9	14.9766	1	9	194.468
YIR042C	9	181.9	18.5824	1	9	196.212
YIR031C	9	182.7	11.8318	1	9	186.623
YJL222W	9	13.9	3.62267	0	10	3.47369
YJR112W-A	9	160.9	3.78371	0	10	191.336
YKR053C	9	39.9	3.82159	0	11	203.227
YLR104W	9	29.9	5.80819	0	12	124.799
YLR099W-A	9	40.8	3.37307	0	12	122.909
YLR238W	9	51.9	4.14438	0	12	221.31
YLR137W	9	116.9	3.40337	0	12	150.096
YNL074C	9	16.9	4.6044	0	14	181.068
YOR263C	9	69.1	4.94579	0	15	270.349
YDL031W	10	39.4	3.45463	0	4	122.233
YDR310C	10	41.4	3.43368	0	4	336.109
YDR359C	10	43.4	3.64653	0	4	370.405
YDR363W	10	44.4	3.34829	0	4	371.738
YDR334W	10	44.4	3.52254	0	4	352.173
YDR464W	10	45	3.43216	0	4	430.549
YDR217C	10	49.4	4.27243	0	4	280.038
YDR015C	10	83.1	3.82101	0	4	148.259
YDL246C	10	211.4	4.50305	0	4	2.98121
YDL247W-A	10	213.6	8.70196	0	4	1.12296
YDL247W	10	213.6	13.598	0	4	1.81213
YER127W	10	47.4	3.51325	0	5	145.105
YFL060C	10	213.6	3.61923	0	6	5.22915
YHL042W	10	16.4	3.63501	0	8	4.67077
YHL043W	10	17.4	3.33979	0	8	4.44087
YIL173W	10	10.4	4.36527	0	9	5.15574
YIL155C	10	54.4	3.36772	0	9	24.1439
YJL222W	10	10.4	4.37726	1	10	3.47369
YJL213W	10	10.4	4.43247	1	10	9.6784
YJL217W	10	10.4	6.33793	1	10	6.97014
YJL218W	10	10.4	6.70653	1	10	6.62223
YJL215C	10	10.4	7.07926	1	10	8.06124
YJL216C	10	10.4	7.90606	1	10	7.85579
YJL187C	10	18.4	3.5145	1	10	23.7746
YJL127C	10	19.4	4.78366	0	10	55.2904
YJL183W	10	22.4	4.43943	1	10	25.2126
YJL179W	10	22.4	4.59926	1	10	26.6248
YJL181W	10	22.4	9.5523	1	10	25.689
YJL171C	10	26.4	5.5676	1	10	30.2644
YJR002W	10	39.4	3.68609	0	10	131.673
YJL121C	10	50.4	9.06357	1	10	57.3475
YJL042W	10	53.4	4.0506	0	10	108.383
YJL132W	10	55.4	4.23821	1	10	48.6121
YJL164C	10	59.4	4.00987	0	10	33.3541
YJL077W-B	10	83.1	3.46552	1	10	88.1908
YJL056C	10	107.4	7.20875	1	10	99.9326
YJL035C	10	110.4	5.09194	1	10	114.294
YJL025W	10	128.4	3.74573	1	10	118.175
YJR017C	10	133.4	3.6962	1	10	140.145
YJR015W	10	137.4	9.5851	1	10	138.853
YJR024C	10	143.4	3.58257	1	10	141.322
YJR056C	10	152.4	4.42767	1	10	162.738
YJR060W	10	162.4	8.62305	1	10	164.61
YJR025C	10	163.4	3.45	0	10	141.533
YJR032W	10	164.4	3.69167	1	10	147.344
YJR055W	10	164.4	4.28908	1	10	161.621
YJR094C	10	173.4	7.30011	1	10	181.666
YJR084W	10	176.3	4.52746	1	10	175.077
YJR088C	10	176.3	4.63681	1	10	176.167
YJR093C	10	176.3	5.54256	1	10	181.23
YJR112W-A	10	176.3	5.8596	1	10	191.336
YJR108W	10	176.3	10.8357	1	10	188.604
YJR127C	10	189.4	10.7345	1	10	198.923
YJR149W	10	207.4	3.69607	1	10	212.122
YJR161C	10	211.4	9.33832	1	10	223.168
YJR159W	10	212.4	5.34659	1	10	220.782
YJR160C	10	213.6	13.4057	1	10	221.913
YKL188C	10	65.1	4.06316	0	11	33.7191
YKL098W	10	114.4	3.58312	0	11	97.422
YLR223C	10	40.4	5.08277	0	12	210.806
YMR056C	10	42.4	3.40495	0	13	131.974
YNL246W	10	10.4	3.50279	0	14	68.6244
YNL091W	10	42.4	3.52795	0	14	167.414
YNL308C	10	42.4	3.55282	0	14	20.6967
YNL334C	10	213.6	4.2786	0	14	4.75801
YOL144W	10	50.4	3.50521	0	15	17.4916
YOR056C	10	52.4	3.87828	0	15	142.415
YOR283W	10	53.4	3.83453	0	15	279.673
YPL044C	10	10.4	4.3545	0	16	136.402
YPL217C	10	37.4	3.34496	0	16	41.5066
YBR249C	11	68.6	4.13983	0	2	215.442
YBR082C	11	159.6	3.32245	0	2	122.082
YBR218C	11	178.6	4.66702	0	2	198.689
YBR256C	11	181.6	3.94234	0	2	218.464
YDR476C	11	89.6	3.55378	0	4	437.43
YDR158W	11	184.6	3.81618	0	4	238.841
YEL035C	11	63.6	3.33633	0	5	29.9322
YER167W	11	92.6	3.73676	0	5	181.36
YGL040C	11	202.6	3.39282	0	7	155.628
YHL035C	11	83.6	4.18797	0	8	9.8027
YJR154W	11	178.6	3.71413	0	10	217.705
YJL071W	11	185.6	3.34238	0	10	91.8268
YKL222C	11	10.6	3.36353	1	11	2.17562
YKL219W	11	10.6	5.46235	1	11	5.54355
YKL187C	11	36.6	3.86405	1	11	34.7617
YKL162C	11	46.6	7.60618	1	11	56.5729
YKL167C	11	57	3.5947	1	11	50.976
YKL162C-A	11	57	3.86342	1	11	55.5208
YKL115C	11	79.6	4.28539	1	11	84.6877
YKL128C	11	79.6	5.14899	1	11	76.5141
YKL130C	11	79.6	13.2158	1	11	74.4706
YKL132C	11	80.6	7.77391	1	11	74.0298
YKL140W	11	82.6	5.1818	1	11	68.6891
YKL110C	11	145.6	3.81746	0	11	87.1957
YKL017C	11	145.6	4.10553	1	11	154.624
YKL024C	11	147.2	7.25634	1	11	149.276
YKL027W	11	150.6	7.13234	1	11	147.16
YKL147C	11	157.6	3.39257	0	11	65.4231
YKL006C-A	11	162.6	7.2632	1	11	163.429
YKR043C	11	194.7	3.33147	1	11	198.071
YKR038C	11	197.6	5.6979	1	11	194.822
YKR031C	11	201.6	7.6082	1	11	192.254
YKR021W	11	202.6	3.96326	0	11	181.942
YKR040C	11	202.6	4.30176	1	11	196.876
YKR062W	11	212.6	3.73324	1	11	212.492
YKR080W	11	232.6	4.08986	1	11	224.184
YLL039C	11	60.6	3.69425	0	12	23.4306
YMR031C	11	57	3.38742	0	13	113.778
YML057W	11	156.6	4.87135	0	13	54.4716
YMR062C	11	186.6	4.69056	0	13	134.74
YNL170W	11	76.6	4.46398	0	14	116.942
YOR139C	11	127.6	3.80006	0	15	193.794
YOR211C	11	151.6	3.88407	0	15	244.73
YPR024W	11	185.6	3.33411	0	16	177.03
YPR058W	11	200.6	3.34661	0	16	195.386
YAL028W	12	236	4.68974	0	1	41.8266
YBL023C	12	127	4.72824	0	2	53.2706
YBL043W	12	245	4.86053	0	2	41.0336
YCR003W	12	71	3.29709	0	3	56.9355
YCR017C	12	80	3.57741	0	3	70.8737
YCR049C	12	131	3.48906	0	3	101.929
YDR316W	12	69	3.43934	0	4	339.051
YDR041W	12	74.2	3.83791	0	4	167.375
YDL110C	12	106	3.29688	0	4	82.1577
YDL243C	12	157.9	3.78439	0	4	5.71247
YDR270W	12	215	4.09395	0	4	311.743
YDL086W	12	224	7.58717	0	4	93.4416
YDR502C	12	225	5.66795	0	4	450.847
YDL174C	12	232	5.96879	0	4	45.7388
YDR529C	12	247.4	3.51055	0	4	463.911
YDL093W	12	247.4	4.44379	0	4	89.8833
YDR044W	12	250	4.47767	0	4	169.486
YDR384C	12	252	4.124	0	4	385.03
YDR518W	12	252	5.63235	0	4	458.342
YDL085C-A	12	258	3.59482	0	4	93.8304
YDL133W	12	260	4.16515	0	4	68.9216
YDL193W	12	266	4.17822	0	4	35.5321
YEL056W	12	53	4.67854	0	5	16.4919
YER165W	12	148	4.00847	0	5	178.62
YER044C	12	220	9.1984	0	5	83.3215
YEL034W	12	225.5	3.84309	0	5	29.9782
YER141W	12	238	3.86089	0	5	158.738
YER053C-A	12	238	11.1616	0	5	91.386
YEL024W	12	239	7.04535	0	5	37.5554
YEL038W	12	241	4.42158	0	5	28.1509
YER014W	12	246	5.12643	0	5	63.9308
YEL047C	12	249	3.45342	0	5	23.3656
YEL039C	12	251	5.61768	0	5	27.9811
YFR003C	12	104	4.78531	0	6	73.4573
YFR033C	12	237	5.14411	0	6	107.895
YGR084C	12	74.2	3.76161	0	7	239.781
YGR231C	12	87	3.52285	0	7	352.812
YGL001C	12	222	8.86275	0	7	183.742
YGR060W	12	223	6.61913	0	7	225.895
YGR223C	12	225.5	3.7467	0	7	348.654
YGR234W	12	232	10.2865	0	7	355.183
YGR049W	12	239	8.10796	0	7	218.79
YGL144C	12	256	4.81981	0	7	86.773
YHR011W	12	74.2	3.73868	0	8	38.3243
YHR079C	12	103	3.82142	0	8	78.4495
YHL033C	12	157.9	3.5209	0	8	10.7858
YHR039C	12	218	10.1623	0	8	56.0242
YHR007C	12	222	4.40529	0	8	36.5
YHR190W	12	224	7.32543	0	8	145.462
YHR072W	12	235	10.2218	0	8	71.7208
YHR048W	12	245	4.06579	0	8	61.3797
YIL173W	12	143	4.34724	0	9	5.15574
YIL121W	12	238	16.1177	0	9	59.481
YIL157C	12	247.4	3.88095	0	9	21.3721
YJR062C	12	69	3.4148	0	10	166.433
YJL222W	12	144	4.35716	0	10	3.47369
YJL213W	12	144	4.47887	0	10	9.6784
YJL215C	12	145	3.60687	0	10	8.06124
YJL217W	12	146	3.85038	0	10	6.97014
YJL219W	12	146	5.87128	0	10	5.87963
YJL218W	12	147	3.39274	0	10	6.62223
YJL216C	12	147	3.62741	0	10	7.85579
YJR105W	12	220	3.93571	0	10	187.06
YJR104C	12	225	4.65797	0	10	186.889
YJL167W	12	243	6.65196	0	10	31.5045
YJR048W	12	245	7.40391	0	10	157.899
YJL108C	12	246	3.5072	0	10	65.6591
YJL048C	12	254	6.77288	0	10	104.608
YJL095W	12	268.3	3.31991	0	10	74.159
YJR091C	12	268.3	3.74031	0	10	179.465
YKL019W	12	66	3.32175	0	11	152.852
YKL152C	12	149	3.34264	0	11	62.4712
YKL219W	12	189	3.84247	0	11	5.54355
YKL150W	12	238	5.90917	0	11	63.29
YKR046C	12	239	14.5179	0	11	199.349
YKL109W	12	240	4.48025	0	11	88.0883
YLL054C	12	17	4.81419	1	12	12.6313
YLL060C	12	25	3.60033	1	12	7.81989
YLL025W	12	33	3.55724	1	12	34.0632
YLL059C	12	36	3.67593	0	12	8.2307
YLL029W	12	41	3.31332	1	12	29.281
YLL016W	12	45	5.04191	1	12	40.5781
YLR011W	12	47	5.68326	1	12	60.8443
YLR006C	12	50	5.53614	1	12	58.9657
YLL006W	12	52	4.9745	1	12	49.1227
YLR382C	12	74.2	4.07596	0	12	318.523
YLR073C	12	90	4.31779	1	12	101.412
YLR031W	12	91	3.59354	1	12	73.5088
YLR059C	12	91	5.96851	1	12	93.8166
YLR091W	12	126	3.73712	1	12	116.068
YLR161W	12	176	10.975	1	12	176.037
YLR155C	12	176	11.8143	1	12	169.328
YLR160C	12	176	11.8574	1	12	175.42
YLR158C	12	176	11.894	1	12	174.103
YLR157W-E	12	176	12.0142	1	12	173.466
YLR157C	12	176	12.3149	1	12	170.646
YLR159W	12	177	11.3506	1	12	174.719
YLR156W	12	177	11.9096	1	12	169.944
YLR157W-D	12	177	12.0056	1	12	171.262
YLR177W	12	178	7.19033	1	12	183.995
YLR179C	12	183	7.96216	1	12	185.314
YLR169W	12	188	4.89731	1	12	180.128
YLR213C	12	197	5.23867	1	12	204.5
YLR056W	12	217	4.74186	0	12	91.4058
YLR287C	12	220	3.75149	0	12	256.328
YLR205C	12	220	5.50894	0	12	199.365
YLR050C	12	221	6.56409	0	12	88.5974
YLR100W	12	222	9.39918	0	12	123.084
YLR259C	12	225.5	3.35745	1	12	239.372
YLR244C	12	226	11.3185	1	12	225.466
YLR153C	12	228	11.5504	0	12	161.09
YLR245C	12	234	4.81858	1	12	225.681
YLR256W	12	236	17.8615	1	12	232.688
YLR255C	12	239	4.58328	1	12	232.522
YLR270W	12	241	4.72196	1	12	245.192
YLR038C	12	245	4.1643	0	12	81.0616
YLR395C	12	248	3.80476	0	12	327.573
YLR272C	12	252	4.86069	1	12	247.356
YLR231C	12	253	3.88836	0	12	218.57
YLR289W	12	261	4.20997	1	12	257.422
YLR300W	12	267	7.54537	1	12	262.428
YLR299W	12	267	9.58148	1	12	261.386
YLR313C	12	274	5.60188	1	12	274.456
YLR329W	12	275	4.03445	1	12	283.122
YLR273C	12	278	3.72269	0	12	248.737
YLR343W	12	299	8.61886	1	12	293.796
YLR351C	12	300	6.31932	1	12	298.941
YLR354C	12	333.3	3.33018	0	12	301.463
YLR389C	12	333.3	8.96799	1	12	324.951
YLR397C	12	336	3.70796	1	12	329.342
YLR411W	12	343	13.8544	1	12	340.985
YLR424W	12	349	4.00325	1	12	350.403
YLR430W	12	360	3.9839	1	12	357.623
YMR188C	12	74.2	4.23398	0	13	216.613
YML081W	12	99	4.07392	0	13	35.6459
YMR177W	12	131	4.07512	0	13	209.649
YMR134W	12	222	7.047	0	13	182.884
YML075C	12	222	9.34109	0	13	40.449
YMR202W	12	223	10.5756	0	13	226.982
YML021C	12	225.5	4.21651	0	13	78.4454
YMR110C	12	225.5	4.94712	0	13	167.288
YMR208W	12	225.5	9.66743	0	13	232.724
YMR015C	12	225.5	10.4057	0	13	102.807
YMR009W	12	229	10.117	0	13	96.5545
YML126C	12	230	10.1256	0	13	6.95502
YML008C	12	233	6.32854	0	13	85.9806
YMR145C	12	236	4.70924	0	13	189.209
YMR220W	12	237	10.6113	0	13	242.171
YML057W	12	241	3.4199	0	13	54.4716
YML054C	12	256	4.42915	0	13	56.8901
YML125C	12	257	4.99397	0	13	7.35085
YNL178W	12	150	3.45716	0	14	112.001
YNL204C	12	182.4	3.85533	0	14	95.9017
YNL280C	12	219	6.50288	0	14	40.8843
YNR043W	12	222	11.0915	0	14	259.708
YNL156C	12	231	10.955	0	14	126.56
YNL111C	12	232	4.54515	0	14	154.395
YNR019W	12	232	15.0362	0	14	246.201
YNL052W	12	241	3.67231	0	14	197.173
YNL100W	12	247.4	3.37234	0	14	161.927
YOL023W	12	67	3.41511	0	15	91.7534
YOL156W	12	142	3.39715	0	15	8.29104
YOR377W	12	231	4.17739	0	15	345.247
YOR065W	12	238	6.2969	0	15	147.632
YOL059W	12	249	4.07896	0	15	71.6118
YPR071W	12	109	3.31331	0	16	199.575
YPL198W	12	154	3.51579	0	16	50.2037
YPL028W	12	217	4.37465	0	16	144.416
YPR151C	12	232	6.76487	0	16	241.18
YPR065W	12	232	8.33159	0	16	197.111
YPR010C-A	12	240	6.51186	0	16	168.929
YPL215W	12	271	3.32385	0	16	42.7404
YAR069C	13	9.6	3.61059	0	1	100.914
YAR070C	13	9.6	5.37819	0	1	101.165
YAR071W	13	9.6	6.54084	0	1	101.434
YBR296C	13	9.6	6.06615	0	2	239.535
YBR093C	13	9.6	7.11038	0	2	129.272
YBR297W	13	13.6	5.5863	0	2	240.135
YBR208C	13	40.6	4.4947	0	2	192.666
YBR218C	13	81.6	3.80892	0	2	198.689
YBR072W	13	85.6	3.39884	0	2	114.606
YBR244W	13	88.6	3.67295	0	2	212.297
YBR233W-A	13	281.6	3.58461	0	2	205.519
YBR017C	13	282	3.47819	0	2	82.1109
YBL097W	13	283.6	4.10261	0	2	12.2199
YBR275C	13	284.6	5.49811	0	2	227.134
YBR207W	13	303	3.92317	0	2	190.543
YCR011C	13	9.6	3.31919	0	3	65.7042
YCR037C	13	9.6	4.54663	0	3	94.664
YCR038W-A	13	12.6	4.31865	0	3	95.6761
YCL064C	13	22.6	3.74061	0	3	8.08501
YCR042C	13	280.6	4.59257	0	3	98.6065
YDR481C	13	9.6	3.34073	0	4	440.251
YDR280W	13	9.6	3.40299	0	4	316.415
YDR247W	13	9.6	5.25566	0	4	296.327
YDR281C	13	9.6	6.11977	0	4	316.902
YDL143W	13	282	3.54624	0	4	61.9656
YDR457W	13	283.6	3.31116	0	4	424.645
YDR037W	13	285.6	3.53248	0	4	162.924
YDR182W	13	288.6	3.45991	0	4	256.581
YDR180W	13	291.6	4.0859	0	4	254.636
YDR138W	13	292.6	3.89489	0	4	226.507
YDR331W	13	296.6	3.36147	0	4	350.203
YER037W	13	9.6	3.97868	0	5	79.075
YER072W	13	9.6	5.64732	0	5	106.009
YER012W	13	282	3.3409	0	5	62.2663
YER021W	13	286.6	3.5287	0	5	68.9428
YER075C	13	300.6	4.01427	0	5	108.947
YFL004W	13	9.6	4.40353	0	6	63.232
YFR028C	13	14.6	3.77989	0	6	100.825
YFL008W	13	282	4.27285	0	6	57.2923
YFL041W	13	302.6	3.43429	0	6	23.5585
YGR233C	13	9.6	4.81583	0	7	354.557
YGL255W	13	274.6	3.61775	0	7	7.74435
YGL194C-A	13	282	3.39371	0	7	51.8211
YGR285C	13	282	3.71918	0	7	393.357
YGR257C	13	296.6	4.40857	0	7	372.689
YHR062C	13	9.6	3.74599	0	8	67.1319
YHR214C-E	13	9.6	6.00582	0	8	165.493
YHR215W	13	9.6	6.93487	0	8	165.673
YHR136C	13	9.6	7.04828	0	8	112.558
YHR214C-D	13	10.6	5.08665	0	8	165.326
YHR216W	13	46.8	3.61777	0	8	166.363
YHR023W	13	282	3.61017	0	8	45.4725
YHL040C	13	303	3.98138	0	8	6.26238
YIL061C	13	11.6	3.7376	0	9	110.462
YIL051C	13	23.6	4.1748	0	9	116.192
YIL144W	13	282	3.50128	0	9	35.0972
YIL033C	13	293.6	3.67195	0	9	131.239
YJL119C	13	9.6	3.51036	0	10	57.5885
YJL117W	13	9.6	3.77215	0	10	57.7789
YJL012C	13	9.6	6.55247	0	10	124.01
YJR092W	13	282	3.29625	0	10	179.585
YJL213W	13	282.6	3.52497	0	10	9.6784
YJL111W	13	289.6	3.64334	0	10	62.3723
YJL177W	13	291.6	3.42887	0	10	27.2232
YKL051W	13	9.6	3.77095	0	11	129.575
YKL032C	13	125.6	3.42089	0	11	144.992
YKL070W	13	265.6	3.34055	0	11	116.227
YKR082W	13	288.6	3.66799	0	11	225.11
YKL220C	13	303	5.1542	0	11	4.30565
YLR410W	13	9.6	3.85948	0	12	337.486
YLR233C	13	11.6	3.33455	0	12	219.433
YLR089C	13	23.6	4.02837	0	12	115.245
YLR438W	13	55.6	4.10963	0	12	364.492
YLR106C	13	286.6	3.54076	0	12	130.961
YLR260W	13	303	3.89293	0	12	239.675
YML077W	13	9.6	3.3347	0	13	38.0568
YMR131C	13	9.6	3.34628	0	13	181.819
YML123C	13	9.6	7.04771	1	13	8.74543
YML116W	13	11.6	3.90784	1	13	12.9673
YML096W	13	25.6	7.86788	1	13	27.1812
YML100W-A	13	29.6	4.0226	1	13	23.8517
YML076C	13	36.6	4.47704	1	13	39.2412
YML079W	13	36.6	5.8492	1	13	37.5065
YML057W	13	54.6	10.2318	1	13	54.4716
YMR016C	13	55.6	3.69802	0	13	103.864
YML064C	13	57.6	6.84241	1	13	49.6182
YML012C-A	13	82.6	5.20182	1	13	83.5764
YML003W	13	91.6	8.30098	1	13	89.5459
YML002W	13	91.6	14.3615	1	13	89.9054
YMR006C	13	92.6	13.9892	1	13	95.0512
YMR005W	13	93.6	4.2722	1	13	93.8146
YMR007W	13	95.6	4.43586	1	13	95.1461
YML015C	13	97.6	3.35484	1	13	82.5961
YMR019W	13	109.6	4.74455	1	13	106.096
YMR047C	13	135.6	5.24963	1	13	124.648
YMR059W	13	137.6	3.56093	1	13	132.945
YMR085W	13	145.6	7.68996	1	13	148.735
YMR124W	13	150.6	3.94411	0	13	174.934
YMR084W	13	150.6	6.13438	1	13	148.442
YMR109W	13	160.6	4.43609	1	13	165.448
YMR157C	13	188.6	3.64491	1	13	194.493
YMR152W	13	190.6	4.92257	1	13	191.456
YMR156C	13	198.2	3.3299	1	13	194.144
YMR150C	13	201.6	4.95761	1	13	191.264
YMR199W	13	211.6	4.49993	1	13	225.322
YMR247C	13	251.6	3.35864	1	13	261.085
YMR259C	13	270.6	7.86783	1	13	268.181
YMR128W	13	277.6	3.81275	0	13	178.079
YMR186W	13	282	4.76404	0	13	215.029
YMR012W	13	283.6	3.40849	0	13	98.9461
YMR076C	13	283.6	4.1697	0	13	142.79
YMR290C	13	287.6	3.3112	1	13	289.535
YMR308C	13	292.6	3.41987	1	13	303.379
YMR258C	13	299.6	3.55528	0	13	266.614
YMR318C	13	303	3.31298	1	13	310.153
YMR319C	13	303	3.76425	1	13	310.968
YNR018W	13	9.6	3.39476	0	14	245.806
YNL232W	13	9.6	3.54819	0	14	79.5137
YNL041C	13	282	3.36143	0	14	204.422
YNL095C	13	282	3.39239	0	14	165.349
YNL262W	13	282	4.02737	0	14	54.8568
YNR038W	13	286.6	3.53206	0	14	257.381
YNL247W	13	286.6	3.81309	0	14	67.6689
YOR342C	13	9.6	3.29113	0	15	319.317
YOR163W	13	9.6	4.5392	0	15	212.075
YOL119C	13	13.6	3.47831	0	15	31.8048
YOR375C	13	30.6	3.75354	0	15	344.198
YOR303W	13	37.6	4.64988	0	15	291.355
YOR052C	13	148.6	4.44107	0	15	140.963
YOR231C-A	13	187.6	3.601	0	15	255.226
YOR323C	13	280.6	3.70844	0	15	304.553
YOR076C	13	282	3.39183	0	15	155.629
YOL090W	13	282	3.75173	0	15	48.6445
YOR151C	13	287.6	3.44349	0	15	203.47
YOL052C-A	13	289.6	3.30868	0	15	76.4487
YOL084W	13	289.6	3.33381	0	15	53.5725
YOR190W	13	291.6	5.64091	0	15	227.937
YOR381W	13	303	3.55264	0	15	348.319
YPL066W	13	9.6	4.44328	0	16	123.589
YPL019C	13	9.6	6.39611	0	16	149.908
YPL018W	13	9.6	6.56873	0	16	150.092
YPL111W	13	26.6	4.86556	0	16	98.6284
YPL137C	13	97.6	4.47833	0	16	86.053
YPR145W	13	275.6	3.44012	0	16	238.563
YPR035W	13	279.6	3.41196	0	16	186.235
YPL274W	13	303	3.94922	0	16	6.63482
YAL040C	14	161.6	3.97857	0	1	30.3961
YAL001C	14	168	5.80802	0	1	67.9327
YAL008W	14	173.6	3.34944	0	1	61.5993
YAL017W	14	210.6	3.37421	0	1	54.1017
YAL026C	14	226.6	3.71372	0	1	44.88
YBL023C	14	156.6	3.39682	0	2	53.2706
YBL063W	14	171.6	5.53332	0	2	30.5742
YBR153W	14	171.6	5.73133	0	2	164.259
YBR053C	14	172.6	4.43868	0	2	102.262
YBL097W	14	172.6	5.36895	0	2	12.2199
YBR059C	14	173.6	4.31139	0	2	108.077
YBR017C	14	173.6	4.42852	0	2	82.1109
YBL050W	14	173.6	4.91115	0	2	37.5585
YBL007C	14	173.6	8.83114	0	2	64.8812
YBR056W	14	175.6	5.0319	0	2	104.399
YBR267W	14	175.6	5.12131	0	2	221.973
YBL009W	14	178.6	3.38483	0	2	62.1393
YBR170C	14	179.6	3.81828	0	2	173.415
YBR046C	14	180.6	5.49208	0	2	99.4846
YBR111C	14	184.6	3.49146	0	2	138.565
YBR080C	14	199.6	3.43036	0	2	120.242
YBL047C	14	213.6	3.30105	0	2	39.6367
YBL034C	14	222.6	4.34114	0	2	47.5499
YBL088C	14	268.6	4.07254	0	2	17.7965
YBR042C	14	275.5	3.41397	0	2	96.5091
YCR042C	14	168	7.52314	0	3	98.6065
YCR036W	14	172.6	4.63334	0	3	92.7975
YCL057W	14	173.6	4.03923	0	3	11.8713
YCR024C	14	174.6	3.77755	0	3	77.8788
YCL034W	14	174.6	4.77343	0	3	29.5812
YCR088W	14	176.6	7.75446	0	3	127.226
YDL159W-A	14	126.6	3.60049	0	4	53.3543
YDL143W	14	163.6	3.35854	0	4	61.9656
YDR283C	14	168	3.38181	0	4	319.293
YDL160C	14	168	3.72542	0	4	53.2763
YDL140C	14	168	4.03081	0	4	65.2365
YDR457W	14	168	8.45237	0	4	424.645
YDR388W	14	168.6	3.56797	0	4	387.56
YDL236W	14	169.6	4.36063	0	4	9.96987
YDL007W	14	170.6	3.4378	0	4	135.811
YDR461C-A	14	170.6	3.55116	0	4	429.589
YDR153C	14	170.6	5.3655	0	4	238.101
YDR150W	14	170.6	7.74613	0	4	234.274
YDR016C	14	171.6	3.39963	0	4	148.432
YDL103C	14	171.6	4.15277	0	4	85.7607
YDR141C	14	171.6	5.83427	0	4	229.427
YDR170C	14	171.6	7.14398	0	4	248.722
YDL070W	14	172.6	3.44771	0	4	102.601
YDR368W	14	172.6	4.48224	0	4	376.305
YDR097C	14	172.6	4.87468	0	4	199.611
YDR506C	14	172.6	5.59863	0	4	453.048
YDL072C	14	173.6	3.30888	0	4	102.422
YDR494W	14	173.6	3.42478	0	4	445.408
YDR122W	14	173.6	3.81864	0	4	215.382
YDR358W	14	173.6	3.84693	0	4	368.908
YDR129C	14	173.6	4.23787	0	4	221.753
YDR448W	14	173.6	5.09982	0	4	420.377
YDL029W	14	173.6	7.37534	0	4	123.826
YDL126C	14	173.6	9.22927	0	4	73.974
YDR375C	14	174.6	3.6337	0	4	380.223
YDR117C	14	176.6	3.89467	0	4	212.574
YDL058W	14	176.6	9.05369	0	4	107.143
YDR238C	14	177.6	5.73215	0	4	291.615
YDR452W	14	178.6	6.44249	0	4	422.496
YDR272W	14	188.8	3.71505	0	4	312.778
YDR246W-A	14	193.6	3.51837	0	4	296.054
YDR444W	14	199.6	3.41533	0	4	418.581
YDR301W	14	206.6	3.3314	0	4	329.595
YDL190C	14	208.6	3.33498	0	4	37.6778
YDL047W	14	211.6	3.55365	0	4	114.635
YDR382W	14	246.6	4.75463	0	4	384.242
YDL203C	14	266.6	3.34485	0	4	30.348
YDR303C	14	266.6	3.36042	0	4	332.084
YER051W	14	166.6	3.49633	0	5	89.1484
YER142C	14	168	4.91455	0	5	159.638
YER172C	14	168	5.26258	0	5	187.581
YER073W	14	169.6	4.65493	0	5	106.438
YEL016C	14	172.6	4.27593	0	5	44.2107
YER017C	14	175.6	3.81631	0	5	67.1403
YER080W	14	178.6	5.23872	0	5	112.009
YER136W	14	181.6	3.72937	0	5	153.903
YER079W	14	181.6	5.43721	0	5	111.645
YER008C	14	214.6	3.94848	0	5	60.1644
YER114C	14	222.6	3.46089	0	5	137.811
YFR009W-A	14	163.6	8.1618	0	6	78.6146
YFR019W	14	168	4.19533	0	6	88.5291
YFL007W	14	168	7.63633	0	6	59.2353
YFR004W	14	170.6	4.54596	0	6	73.5864
YFR009W	14	171.6	6.27089	0	6	77.9491
YFR003C	14	173.6	4.11248	0	6	73.4573
YFL048C	14	173.6	4.50471	0	6	19.2577
YFR016C	14	199.6	6.12782	0	6	86.7232
YFL041W	14	237.2	3.61803	0	6	23.5585
YFL038C	14	274.6	3.80792	0	6	26.8449
YGR018C	14	77.2	3.37487	0	7	194.177
YGL096W	14	133.6	3.46003	0	7	120.4
YGL194C	14	159.6	4.87241	0	7	52.474
YGR178C	14	166.6	7.48394	0	7	315.679
YGL207W	14	168	6.57529	0	7	36.6571
YGL137W	14	168	8.80115	0	7	92.4608
YGL013C	14	168.6	3.88445	0	7	174.776
YGR048W	14	169.6	5.27808	0	7	218.241
YGL195W	14	170.6	6.36905	0	7	48.7006
YGR218W	14	171.6	4.44277	0	7	345.076
YGR116W	14	173.6	4.37262	0	7	266.577
YGL107C	14	173.6	5.42237	0	7	113.344
YGR196C	14	173.6	5.5299	0	7	330.115
YGR135W	14	173.6	6.22525	0	7	281.737
YGL236C	14	173.6	7.46153	0	7	20.651
YGL173C	14	173.6	10.3636	0	7	66.659
YGL203C	14	174.6	4.30197	0	7	42.4628
YGR141W	14	174.6	6.14162	0	7	285.125
YGL206C	14	174.6	6.20134	0	7	39.8142
YGL215W	14	176.6	6.22174	0	7	32.5857
YGL257C	14	177.6	3.36417	0	7	5.22054
YGL130W	14	178.6	4.12372	0	7	98.4871
YGR111W	14	186.6	3.7073	0	7	264.876
YGR271W	14	207.6	3.99486	0	7	381.751
YGL151W	14	213.6	3.86002	0	7	80.4849
YGL219C	14	213.6	6.16873	0	7	31.2047
YHL029C	14	165.6	3.61958	0	8	14.3773
YHR186C	14	168	5.69925	0	8	144.206
YHR205W	14	170.6	3.75947	0	8	152.839
YHR023W	14	170.6	7.05721	0	8	45.4725
YHL030W	14	171.6	11.6263	0	8	12.0064
YHR027C	14	172.6	5.04146	0	8	49.3765
YHR091C	14	172.6	6.17696	0	8	85.9931
YHR200W	14	175.6	4.58878	0	8	149.745
YHR104W	14	177.6	3.65542	0	8	97.0133
YHR117W	14	177.6	3.78437	0	8	102.71
YHR016C	14	178.6	3.49144	0	8	41.4544
YHR120W	14	200.6	3.56363	0	8	104.882
YHR158C	14	206.6	4.70104	0	8	125.191
YIL107C	14	168	3.63705	0	9	74.5659
YIL075C	14	171.6	4.79702	0	9	99.2661
YIR007W	14	171.6	5.99074	0	9	166.848
YIL026C	14	172.6	3.40381	0	9	138.576
YIL093C	14	177.6	3.39076	0	9	84.9165
YIL137C	14	177.6	6.53717	0	9	41.7133
YIL129C	14	208.6	3.8721	0	9	50.9225
YIL065C	14	271.6	3.49407	0	9	108.757
YJL099W	14	162.6	3.77888	0	10	71.8124
YJR092W	14	168	4.28573	0	10	179.585
YJL020C	14	168.6	8.5978	0	10	120.703
YJL133W	14	169.6	3.31544	0	10	48.2244
YJR031C	14	170.6	3.88508	0	10	147.264
YJR140C	14	171.6	3.50194	0	10	208.691
YJL070C	14	171.6	3.5173	0	10	93.1822
YJR111C	14	172.6	3.67614	0	10	191.009
YJR138W	14	173.6	4.24848	0	10	205.36
YJL208C	14	173.6	6.19805	0	10	12.3793
YJR033C	14	175.6	6.24883	0	10	148.952
YJL071W	14	176.6	5.2618	0	10	91.8268
YJL164C	14	177.6	3.43969	0	10	33.3541
YJR051W	14	179.6	3.81666	0	10	158.955
YJL005W	14	180.6	3.71531	0	10	127.548
YJR059W	14	203.6	3.73131	0	10	163.721
YJL178C	14	207.6	4.38014	0	10	27.0169
YJL176C	14	248.6	3.64333	0	10	28.3501
YJR132W	14	257.6	4.65209	0	10	200.857
YJR024C	14	262.6	3.34631	0	10	141.322
YKL092C	14	161.6	3.73177	0	11	102.248
YKL049C	14	163.6	3.80438	0	11	131.648
YKL203C	14	168	4.42775	0	11	24.0804
YKL145W	14	168	5.70146	0	11	66.1988
YKL190W	14	169.6	3.50759	0	11	31.506
YKR031C	14	170.6	3.47269	0	11	192.254
YKR039W	14	170.6	4.21864	0	11	195.545
YKL068W	14	170.6	6.80349	0	11	117.744
YKL010C	14	170.6	8.5362	0	11	161.692
YKL151C	14	171.6	3.91094	0	11	63.0572
YKL157W	14	172.6	3.78331	0	11	58.9082
YKL106W	14	172.6	4.11681	0	11	90.1073
YKL210W	14	172.6	11.0199	0	11	14.9098
YKL142W	14	173.6	3.48584	0	11	67.8304
YKL207W	14	174.6	3.98015	0	11	18.3326
YKL065C	14	174.6	6.12168	0	11	120.352
YKL129C	14	174.6	6.53409	0	11	76.0393
YKR001C	14	174.6	9.21297	0	11	168.082
YKR018C	14	176.6	3.91761	0	11	180.676
YKR084C	14	176.6	4.2616	0	11	227.42
YKL215C	14	177.6	8.07447	0	11	11.6972
YKL127W	14	200.6	4.50009	0	11	77.1855
YKL170W	14	213.6	3.68302	0	11	49.6438
YKL027W	14	214.6	3.42019	0	11	147.16
YKL018W	14	261.6	4.62043	0	11	153.434
YLR016C	14	55.6	3.6249	0	12	63.8417
YLR095C	14	160.6	3.67658	0	12	119.601
YLR055C	14	168	3.9125	0	12	91.1242
YLR439W	14	168	5.86897	0	12	365.209
YLR284C	14	168.6	6.0563	0	12	254.517
YLR139C	14	169.6	3.33518	0	12	152.419
YLR407W	14	169.6	3.33622	0	12	335.839
YLL040C	14	169.6	15.3983	0	12	22.8684
YLR454W	14	170.6	6.71426	0	12	375.841
YLL018C	14	174.6	3.61018	0	12	40.1202
YLR398C	14	174.6	3.8343	0	12	330.823
YLR069C	14	174.6	4.86393	0	12	98.6358
YLR067C	14	177.6	3.39298	0	12	97.481
YLR253W	14	177.6	4.21094	0	12	231.326
YLR312W-A	14	178.6	3.59344	0	12	273.427
YLR207W	14	180.6	3.51792	0	12	200.487
YLR014C	14	180.6	6.1034	0	12	62.964
YLR193C	14	181.6	3.54763	0	12	194.627
YLL035W	14	264.6	3.43898	0	12	24.6447
YMR080C	14	165.6	4.37904	0	13	146.058
YML117W	14	168	4.08225	0	13	11.6203
YMR283C	14	168.6	4.40063	0	13	284.517
YMR140W	14	169.6	3.83483	0	13	186.236
YMR076C	14	169.6	4.82838	0	13	142.79
YMR219W	14	169.6	5.53545	0	13	240.413
YMR166C	14	169.6	5.96215	0	13	202.121
YML080W	14	169.6	7.25042	0	13	37.0163
YMR027W	14	169.6	8.80719	0	13	110.762
YMR257C	14	170.6	6.89151	0	13	265.848
YML025C	14	171.6	3.79704	0	13	76.5515
YMR093W	14	171.6	4.04107	0	13	154.361
YMR304W	14	171.6	9.2357	0	13	297.507
YMR024W	14	172.6	4.53312	0	13	109.401
YML070W	14	172.6	5.82343	0	13	45.4071
YML034W	14	173.6	3.71407	0	13	71.2144
YMR277W	14	173.6	5.91202	0	13	278.86
YMR237W	14	174.6	3.92936	0	13	252.839
YMR181C	14	175.6	4.2866	0	13	212.209
YMR287C	14	175.6	4.34049	0	13	287.406
YMR159C	14	176.6	3.45116	0	13	195.472
YML001W	14	178.6	4.06791	0	13	90.8
YMR182C	14	178.6	5.54697	0	13	212.58
YMR261C	14	200.6	3.30123	0	13	269.708
YMR275C	14	203.6	4.40922	0	13	278.29
YMR008C	14	206.6	3.66147	0	13	96.0385
YML017W	14	211.1	4.03472	0	13	80.4076
YMR086C-A	14	247.6	3.40883	0	13	150.394
YNL316C	14	12.6	3.48024	1	14	15.9424
YNL311C	14	15.6	4.30858	1	14	19.1361
YNL323W	14	17.6	8.5642	1	14	11.8151
YNL246W	14	36.6	5.83836	0	14	68.6244
YNL245C	14	45.6	7.23416	0	14	69.1511
YNL236W	14	77.2	4.67889	1	14	76.5602
YNL134C	14	140.6	3.60937	1	14	138.212
YNL138W-A	14	144.6	6.87675	1	14	135.43
YNL090W	14	155.6	5.56076	1	14	168.987
YNL065W	14	157.6	4.01088	0	14	187.041
YNL125C	14	158.6	3.47706	1	14	145.073
YNL123W	14	158.6	5.36414	1	14	146.007
YNL139C	14	164.6	3.93177	0	14	135.314
YNL095C	14	166.6	15.4287	1	14	165.349
YNL242W	14	168	5.04829	0	14	70.7919
YNL102W	14	168.6	3.30425	1	14	159.136
YNL193W	14	168.6	5.92805	0	14	101.482
YNL253W	14	169.6	3.98326	0	14	62.9167
YNL243W	14	169.6	4.52118	0	14	69.5821
YNL262W	14	169.6	10.4578	0	14	54.8568
YNL155W	14	171.6	3.88854	0	14	126.762
YNL252C	14	172.6	5.04308	0	14	63.755
YNL138W	14	173.6	4.69289	0	14	135.691
YNL088W	14	173.6	8.57611	1	14	169.423
YNL084C	14	174.6	4.58432	1	14	174.552
YNL004W	14	174.6	5.25819	0	14	230.495
YNR035C	14	175.6	4.09258	0	14	256.809
YNL041C	14	175.6	6.71086	0	14	204.422
YNL054W	14	177.6	3.39366	1	14	195.156
YNL071W	14	177.6	5.88697	1	14	182.37
YNL297C	14	178.6	7.4278	0	14	28.3674
YNL098C	14	180.6	4.43337	1	14	163.024
YNL057W	14	187.6	12.121	1	14	191.692
YNL058C	14	194.6	5.75253	1	14	191.803
YNR029C	14	199.6	3.3989	0	14	251.06
YNL018C	14	201.6	6.85053	0	14	222.649
YNL056W	14	204.6	4.32409	1	14	191.994
YNL034W	14	205.6	6.45413	1	14	211.037
YNL016W	14	206.6	3.5132	1	14	223.07
YNL019C	14	211.1	3.48045	1	14	221.705
YNL271C	14	221.6	3.5439	0	14	50.1149
YNL010W	14	222.6	3.71055	1	14	227.051
YNR013C	14	232.6	4.57745	1	14	241.165
YNR034W	14	252.6	6.58905	1	14	255.433
YNL167C	14	262.6	3.37534	0	14	118.941
YNL291C	14	265.6	3.6479	0	14	31.7906
YNR065C	14	274.6	7.18302	1	14	278.849
YNR066C	14	275.5	8.09231	1	14	279.343
YOR323C	14	162.6	3.65437	0	15	304.553
YOR334W	14	162.6	4.13641	0	15	311.709
YOR008C	14	163.6	3.28544	0	15	112.985
YOL038W	14	168	3.37855	0	15	84.2464
YOR153W	14	168	4.36025	0	15	204.515
YOR367W	14	168.6	5.03154	0	15	338.584
YOR386W	14	169.6	3.7031	0	15	352.047
YOR201C	14	172.6	4.42137	0	15	238.175
YOL090W	14	172.6	7.00112	0	15	48.6445
YOR205C	14	173.6	4.68531	0	15	239.999
YOL130W	14	174.6	3.57385	0	15	24.545
YOR124C	14	178.6	8.63972	0	15	184.34
YOR176W	14	208.6	4.48161	0	15	218.578
YOL107W	14	217.6	4.17297	0	15	37.0002
YOR307C	14	246.6	3.31453	0	15	295.047
YOR054C	14	260.6	4.36211	0	15	141.832
YOR327C	14	261.6	3.37644	0	15	307.25
YOR077W	14	274.6	4.12799	0	15	155.721
YOR362C	14	275.5	4.70913	0	15	336.192
YPL040C	14	169.6	5.02974	0	16	138.876
YPR103W	14	170.6	7.68354	0	16	212.414
YPR051W	14	171.6	3.31641	0	16	192.836
YPL085W	14	172.6	8.59464	0	16	112.278
YPL009C	14	175.6	3.65353	0	16	156.27
YPR091C	14	176.6	3.99803	0	16	208.38
YPR189W	14	176.6	8.27137	0	16	264.708
YPL029W	14	177.6	4.19028	0	16	143.664
YPR036W	14	181.6	5.21528	0	16	186.707
YPL105C	14	190.6	3.3588	0	16	103.11
YPL097W	14	202.6	4.05277	0	16	105.874
YPR024W	14	202.6	4.83629	0	16	177.03
YPL104W	14	207.6	3.68788	0	16	103.193
YPR085C	14	211.1	3.68874	0	16	205.869
YPR124W	14	241.6	4.10554	0	16	228.021
YPL014W	14	267.6	3.55488	0	16	152.964
Q0110	14	100.6	3.67853	0	17	NA
YBL083C	15	219.1	3.76604	0	2	21.0298
YCR092C	15	49.2	3.44615	0	3	134.3
YCR102C	15	49.2	8.12486	0	3	146.607
YCR050C	15	328.1	4.39386	0	3	102.627
YDR381C-A	15	49.2	4.39541	0	4	383.975
YDR533C	15	49.2	9.30357	0	4	465.651
YDL196W	15	97.1	3.40318	0	4	33.0729
YDL088C	15	185.1	3.30661	0	4	93.0055
YDR011W	15	210.2	6.72496	0	4	144.446
YDL056W	15	214.1	3.74051	0	4	109.385
YDR473C	15	221.1	3.55415	0	4	435.8
YDL099W	15	222.1	3.69175	0	4	87.8758
YDL108W	15	299.1	3.30091	0	4	83.0084
YDR113C	15	309.1	4.36043	0	4	211.325
YDL051W	15	321.1	3.40525	0	4	112.827
YER100W	15	317.1	3.30305	0	5	125.844
YFL016C	15	157.1	3.37756	0	6	50.9626
YGR243W	15	49.2	3.59551	0	7	361.617
YGR023W	15	49.2	4.19494	0	7	195.866
YGR293C	15	76.1	3.3163	0	7	399.719
YGR147C	15	92.1	4.60499	0	7	291.16
YGR197C	15	216.1	4.31922	0	7	330.839
YGL244W	15	223.1	3.78318	0	7	15.3489
YGR212W	15	320.1	3.4227	0	7	339.33
YHL041W	15	122.1	3.4825	0	8	5.1885
YHR135C	15	317.1	4.31776	0	8	112.321
YIR021W	15	217.1	3.3789	0	9	178.803
YIL088C	15	321.1	3.88789	0	9	89.6905
YIL061C	15	329.3	5.16916	0	9	110.462
YJR020W	15	275.1	3.47435	0	10	140.435
YJR156C	15	297.1	3.45651	0	10	218.848
YJL011C	15	319.1	3.90744	0	10	124.422
YJR106W	15	320.1	3.59035	0	10	187.438
YKL060C	15	49.2	3.31545	0	11	124.318
YKR044W	15	84.1	3.43814	0	11	198.186
YKL085W	15	158.1	4.01724	0	11	105.924
YLL028W	15	49.2	14.8044	0	12	30.4843
YLR172C	15	67.5	3.50793	0	12	180.787
YMR325W	15	46.1	3.46441	0	13	313.723
YMR319C	15	49.2	4.15746	0	13	310.968
YMR272C	15	49.2	4.46139	0	13	275.634
YMR311C	15	223.1	3.8158	0	13	305.209
YMR146C	15	311.1	4.95292	0	13	189.905
YMR078C	15	312.9	3.5255	0	13	144.39
YNL134C	15	49.2	4.94294	0	14	138.212
YNL136W	15	225.1	3.99951	0	14	137.028
YNL053W	15	230.1	3.31055	0	14	196.536
YNL056W	15	277.1	4.66786	0	14	191.994
YNL046W	15	293.1	4.37553	0	14	200.958
YNL190W	15	326.1	3.42651	0	14	104.465
YOL133W	15	12.1	4.2612	1	15	23.1958
YOL154W	15	12.1	5.0972	1	15	11.3884
YOL164W	15	15.1	4.40668	1	15	1.98831
YOL137W	15	15.1	4.87383	1	15	21.6383
YOL114C	15	28.2	3.4855	1	15	34.3014
YOL113W	15	30.1	5.97269	1	15	34.4337
YOL087C	15	35.1	4.69349	1	15	52.349
YOL104C	15	43.1	4.37688	1	15	38.7667
YOR394W	15	48.1	3.32298	0	15	357.287
YOL091W	15	49.2	17.071	1	15	47.9686
YOR385W	15	51.1	3.48522	0	15	351.454
YOL092W	15	52.1	4.94758	1	15	47.5956
YOL095C	15	53.1	10.2467	1	15	46.6526
YOL082W	15	61.1	3.30045	1	15	55.6685
YOL060C	15	71.1	5.70561	1	15	71.2848
YOL065C	15	71.1	6.37282	1	15	67.8948
YOL026C	15	89.2	5.92037	1	15	90.5318
YOL028C	15	91.1	4.39048	1	15	89.5477
YOL029C	15	92.1	5.71006	1	15	89.2343
YOL027C	15	93.1	4.36861	1	15	90.3243
YOL018C	15	104.1	3.34471	1	15	96.3778
YOR013W	15	108.1	11.7196	1	15	117.714
YOR012W	15	112.1	12.2594	1	15	117.645
YOL014W	15	116.1	6.14808	1	15	98.8912
YOR011W	15	116.1	10.6206	1	15	115.381
YOR038C	15	121.1	3.2904	1	15	133.759
YOR028C	15	129.2	5.80592	1	15	126.842
YOR020W-A	15	135.1	7.76812	1	15	122.64
YOR026W	15	136.1	5.44376	1	15	125.311
YOR051C	15	143.1	16.7879	1	15	140.587
YOR050C	15	144.1	8.35699	1	15	140.103
YOR062C	15	151.1	4.38163	1	15	146.342
YOR072W	15	151.1	9.87932	1	15	152.28
YOR045W	15	156.1	3.58896	1	15	136.551
YOR080W	15	158.1	5.71639	1	15	156.613
YOR125C	15	171.1	5.28672	1	15	184.698
YOR109W	15	174.1	5.62466	1	15	173.359
YOR152C	15	194.1	4.14907	1	15	204.003
YOR138C	15	196.1	3.78958	1	15	193.459
YOR139C	15	205.1	3.57396	1	15	193.794
YOR141C	15	206.1	5.10628	1	15	195.525
YOR150W	15	206.1	5.90137	1	15	201.929
YOR144C	15	209.1	3.60631	1	15	199.65
YOR162C	15	209.1	4.93084	1	15	211.827
YOR076C	15	210.2	3.63004	0	15	155.629
YOR160W	15	210.2	4.99094	1	15	209.133
YOR165W	15	211.1	4.36824	1	15	212.679
YOR148C	15	212.1	9.33984	1	15	201.004
YOR174W	15	213.1	5.20866	1	15	217.37
YOR386W	15	220.1	3.51851	0	15	352.047
YOR186W	15	226.1	4.24141	1	15	225.429
YOR193W	15	237.1	3.2965	1	15	234.458
YOR192C-C	15	240.1	12.2785	1	15	232.404
YOR222W	15	248.1	5.40387	1	15	250.262
YOR266W	15	270.1	5.65427	1	15	270.963
YOR306C	15	295.1	4.46485	1	15	294.17
YOR304C-A	15	303.1	6.91008	1	15	293.285
YOR305W	15	305.1	4.84986	1	15	293.375
YOR228C	15	318.1	4.29525	0	15	253.382
YOR346W	15	320.1	6.78588	1	15	324.011
YOR353C	15	325.1	3.51398	1	15	330.287
YOL159C-A	15	347.3	4.25411	0	15	5.06723
YOR394C-A	15	347.3	4.43426	1	15	357.832
YOL159C	15	347.3	4.5312	0	15	5.82335
YOL160W	15	347.3	7.022	0	15	4.67383
YPL197C	15	58.1	4.00239	0	16	50.668
YPL106C	15	73.1	3.35039	0	16	102.201
YPR195C	15	275.1	3.7638	0	16	269.252
YPR003C	15	323.1	3.75469	0	16	163.478
YHL042W	16	111	3.63198	0	8	4.67077
YHL043W	16	111	4.12267	0	8	4.44087
YHL009W-B	16	129.3	4.62412	0	8	25.7863
YHL009W-A	16	130.3	4.00555	0	8	25.7863
YJL067W	16	86.3	3.29187	0	10	94.2194
YJL113W	16	128.4	3.9562	0	10	59.3905
YJL114W	16	130.3	3.64112	0	10	59.3905
YML110C	16	111	3.30268	0	13	17.3147
YML079W	16	121.3	4.73522	0	13	37.5065
YMR169C	16	240.3	3.3875	0	13	204.301
YNL269W	16	108.3	3.40346	0	14	50.9709
YOR343C	16	76.6	3.53333	0	15	319.598
YPL248C	16	22.3	6.78853	1	16	23.8361
YPL245W	16	25	4.86774	1	16	24.7708
YPL201C	16	46.3	7.64506	1	16	49.6256
YPL186C	16	57.3	6.74198	1	16	56.6518
YPL095C	16	110.3	3.32962	1	16	107.175
YPL111W	16	110.3	3.81234	1	16	98.6284
YPL091W	16	111	7.71242	1	16	108.931
YPL088W	16	111	14.7067	1	16	110.804
YPL076W	16	112.3	3.50178	1	16	119.029
YPL067C	16	124.3	3.85071	1	16	123.477
YPL059W	16	128.4	3.35802	1	16	128.889
YPL020C	16	141.3	5.88136	1	16	149.084
YPL025C	16	143.3	5.40921	1	16	145.847
YPL024W	16	145.3	7.95911	1	16	145.989
YPL016W	16	156.3	5.8228	1	16	151.068
YPL002C	16	158.3	14.8501	1	16	160.738
YPL001W	16	162.5	4.77374	1	16	160.819
YPR022C	16	179.4	3.99842	1	16	176.111
YPR048W	16	193.3	3.58816	1	16	191.159
YPR047W	16	196.3	4.3477	1	16	190.68
YPL042C	16	208.3	3.37559	0	16	137.63
YPR109W	16	214.1	10.9528	1	16	215.994
YPR095C	16	218.3	4.38488	1	16	210.196
YPR114W	16	218.3	5.27095	1	16	218.489
YPR115W	16	219.3	3.82877	1	16	218.945
YPR135W	16	224.3	4.61565	1	16	231.794
YPL027W	16	237.3	4.421	0	16	144.871
YPR148C	16	251.3	3.40009	1	16	240.158
YPR195C	16	266.3	7.86105	1	16	269.252
YPR200C	16	267.4	4.92308	1	16	272.552
YPR199C	16	267.4	4.93799	1	16	272.367
YPR198W	16	267.4	6.04277	1	16	270.917
YPR201W	16	267.4	8.50007	1	16	272.625

## Sheet: MS EtOH Abundance
UID	peaks.chr	peaks.pos	peaks.lod	cis (+/- 20 cM)	trait.chr	trait.pos
YAR073W	1	12.7	3.3063	0	1	102.461
YHR216W	1	12.7	3.37109	0	8	166.363
YMR210W	1	12.7	3.54765	0	13	233.759
YOR318C	1	12.7	3.66301	0	15	300.983
YAL058W	1	12.7	4.19439	1	1	16.8434
YAL062W	1	12.7	4.23175	1	1	14.1844
YAL067C	1	12.7	6.94856	1	1	4.0329
YAL049C	1	12.7	7.14754	1	1	23.6662
YAR060C	1	12.7	7.95218	0	1	97.8486
YDR243C	1	12.7	8.06156	0	4	294.551
YAL065C	1	12.7	13.7575	1	1	5.35373
YAL064W-B	1	12.7	20.766	1	1	5.39648
YHR213W-B	1	17.7	3.68764	0	8	162.282
YNR016C	1	21.7	4.09894	0	14	244.735
YGR149W	1	38.2	3.62156	0	7	291.939
YAL016C-A	1	38.2	3.62371	1	1	56.2778
YAL017W	1	42.7	6.47586	1	1	54.1017
YAR008W	1	56.7	6.26978	1	1	71.5145
YAL003W	1	65.7	6.04412	1	1	63.9622
YAR031W	1	75.7	5.08891	1	1	84.0538
YAR035W	1	76.7	4.8816	1	1	85.5646
YGL051W	1	77.7	8.0051	0	7	149.387
YAR033W	1	78.7	9.85206	1	1	84.6258
YAR028W	1	80.7	13.48	1	1	83.179
YAR027W	1	80.7	14.1742	1	1	82.674
YAR030C	1	81.7	9.9228	1	1	84.0615
YAR029W	1	82.7	12.2162	1	1	83.8221
YAR047C	1	85.7	11.0302	1	1	90.7818
YAR053W	1	87.7	7.27903	1	1	93.7421
YAR050W	1	87.7	13.3102	1	1	91.5081
YAL063C	1	87.7	14.9944	0	1	12.5618
YBL102W	2	10.1	3.61103	1	2	7.19643
YGR141W	2	10.1	3.7043	0	7	285.125
YKL001C	2	10.1	3.90335	0	11	166.816
YNL217W	2	11.1	3.293	0	14	88.9015
YBL101C	2	11.1	10.251	1	2	8.45681
YBL100W-C	2	15.1	3.48408	1	2	8.49521
YBL098W	2	16.1	3.42491	1	2	11.7131
YHL010C	2	25.1	3.30089	0	8	25.1284
YJR110W	2	32.1	4.03032	0	10	190.079
YNL293W	2	33.1	3.33035	0	14	29.8717
YBL019W	2	39.1	3.36163	1	2	55.3114
YBL044W	2	39.1	11.8829	1	2	40.8262
YNL135C	2	44.1	3.44063	0	14	137.713
YMR176W	2	47.1	4.54323	0	13	208.005
YBL011W	2	54.1	3.96395	1	2	61.0464
YGR191W	2	59.1	3.28715	0	7	325.753
YKR062W	2	59.1	4.10928	0	11	212.492
YDR170W-A	2	61.1	6.30705	0	4	249.023
YGR267C	2	63.1	3.48705	0	7	379.51
YOR258W	2	64.9	3.38207	0	15	267.875
YBR012C	2	77.1	5.97355	1	2	77.8619
YBR013C	2	80.1	8.35111	1	2	79.7597
YBR026C	2	90.1	7.65974	1	2	88.2167
YDL140C	2	94.1	3.62534	0	4	65.2365
YBR063C	2	100.1	4.76147	1	2	110.468
YBR065C	2	106.1	6.27764	1	2	110.914
YBR062C	2	107.1	3.7166	1	2	109.965
YER015W	2	110.1	3.40912	0	5	64.6088
YBR111C	2	114.1	3.31284	0	2	138.565
YBR087W	2	116.1	11.2572	1	2	127.112
YBR112C	2	118.1	3.42627	0	2	139.737
YOL126C	2	118.1	4.00225	0	15	27.366
YBR203W	2	119.1	6.8542	0	2	188.746
YBR234C	2	121.2	4.42351	0	2	206.005
YOR100C	2	122.1	3.3237	0	15	169.738
YIL099W	2	127.1	3.82732	0	9	80.0701
YBR085C-A	2	129.1	4.31701	1	2	125.729
YBR107C	2	129.1	9.00881	1	2	136.359
YBR103W	2	131.1	9.30752	1	2	134.308
YBR106W	2	132.1	4.68784	1	2	135.796
YHR182W	2	134.1	4.08682	0	8	140.459
YBR119W	2	139.1	10.791	1	2	143.815
YHR063C	2	145.1	4.27257	0	8	67.554
YBR094W	2	145.1	10.1077	1	2	129.598
YBR098W	2	149.1	6.05094	1	2	132.447
YLR152C	2	150.1	3.3327	0	12	160.048
YDL138W	2	150.1	4.84635	0	4	66.1003
YBR148W	2	154.1	3.9793	1	2	161.394
YBR149W	2	162.1	5.06553	1	2	162.025
YIL101C	2	166.1	3.72705	0	9	79.7311
YLR172C	2	167.1	4.44931	0	12	180.787
YNL277W-A	2	168.1	4.86443	0	14	43.2011
YDL179W	2	169.1	4.39547	0	4	42.8557
YOL097C	2	170.1	3.37522	0	15	45.4902
YBR210W	2	170.1	3.38763	0	2	193.67
YOR264W	2	171.1	7.25286	0	15	270.251
YER131W	2	173.1	3.64759	0	5	148.431
YBR166C	2	173.1	9.46482	1	2	171.357
YBR158W	2	174.1	11.2341	1	2	166.977
YGR103W	2	175.1	3.43352	0	7	257.299
YBR157C	2	175.1	4.29186	1	2	166.307
YHR055C	2	175.1	6.19273	0	8	64.4249
YHR143W	2	175.1	9.83032	0	8	115.689
YGL028C	2	175.1	11.7193	0	7	163.897
YBR085W	2	176.1	3.56012	0	2	124.773
YPR105C	2	176.1	5.58063	0	16	214.51
YHR053C	2	176.1	6.4764	0	8	63.8237
YNL066W	2	176.1	9.51632	0	14	186.195
YDL055C	2	177.1	5.39486	0	4	110.591
YBR174C	2	177.1	15.0369	1	2	174.78
YOL094C	2	177.5	3.38253	0	15	47.0514
YBR229C	2	177.5	3.46527	0	2	203.789
YBL047C	2	177.5	3.7812	0	2	39.6367
YBR188C	2	177.5	5.04534	1	2	181.214
YER124C	2	177.5	10.1573	0	5	143.202
YJL078C	2	179.1	10.4027	0	10	88.1709
YGR041W	2	179.1	11.3103	0	7	213.687
YBR193C	2	180.1	7.05817	1	2	182.911
YLR286C	2	181.1	9.57617	0	12	255.634
YNR067C	2	181.1	10.1179	0	14	280.846
YNL078W	2	182.1	4.19135	0	14	177.869
YPR110C	2	184.1	3.54725	0	16	216.615
YNL327W	2	185.1	7.2409	0	14	8.89106
YIL002C	2	186.1	3.39769	0	9	159.082
YBR175W	2	186.1	5.39333	1	2	174.707
YER152C	2	187.1	5.13619	0	5	165.909
YDL127W	2	191.1	3.57904	0	4	72.8112
YGR123C	2	194.1	3.63424	0	7	273.178
YLR106C	2	196.3	3.43705	0	12	130.961
YBR237W	2	198.1	3.69844	1	2	207.621
YKR022C	2	200.1	3.52538	0	11	183.425
YOR301W	2	202.1	3.34979	0	15	290.717
YGL120C	2	203.1	3.81237	0	7	105.075
YBR230W-A	2	203.1	5.50973	1	2	204.132
YDR465C	2	207.1	3.60538	0	4	432.312
YBR302C	3	24.9	3.78004	0	2	243.422
YCL017C	3	24.9	6.53507	0	3	45.2389
YOR032W-A	3	25.9	4.44663	0	15	129.4
YAL040C	3	27.9	3.5228	0	1	30.3961
YCL004W	3	29.9	4.46845	0	3	52.3655
YCL026C-B	3	33.9	4.00137	1	3	35.4998
YCL021W-A	3	41.9	10.0861	1	3	40.125
YCR024C-B	3	56.9	4.29649	0	3	78.1875
YDR233C	3	60.9	4.02174	0	4	288.372
YNL146C-A	3	74.8	3.51577	0	14	130.103
YCR020W-B	3	74.8	8.83747	1	3	74.566
YCR020C	3	74.8	15.2535	1	3	74.2485
YCR018C	3	74.8	19.8996	1	3	71.4833
YCR083W	3	124.9	3.94134	1	3	124.594
YDL211C	4	21.3	4.03536	1	4	24.906
YDL207W	4	30.3	5.14889	1	4	27.3384
YMR214W	4	39.3	4.02836	0	13	236.416
YBR151W	4	44.3	3.71056	0	2	163.532
YIL132C	4	46.7	3.70836	0	9	45.1869
YDL169C	4	46.7	4.86586	1	4	49.1911
YDL168W	4	49.3	15.0403	1	4	49.4601
YFR007W	4	60.3	3.29289	0	6	76.4192
YPR191W	4	63.3	3.54563	0	16	266.664
YHR094C	4	64.3	6.83448	0	8	87.7544
YBL045C	4	65.3	3.45648	0	2	40.6814
YDL142C	4	66.3	3.5859	1	4	62.7625
YOR065W	4	66.3	3.84357	0	15	147.632
YDR462W	4	66.6	3.58827	0	4	429.684
YGL191W	4	66.6	3.69197	0	7	53.6141
YEL024W	4	66.6	3.82449	0	5	37.5554
YGR183C	4	66.6	3.83938	0	7	317.917
YMR145C	4	66.6	5.34585	0	13	189.209
YLR327C	4	89.3	3.5917	0	12	282.024
YDL181W	4	89.3	4.00521	0	4	41.8908
YJR104C	4	89.3	4.37103	0	10	186.889
YMR280C	4	89.3	5.9454	0	13	282.63
YML120C	4	90.3	3.6766	0	13	10.1087
YDR529C	4	90.3	4.28486	0	4	463.911
YBR299W	4	91.3	3.46217	0	2	241.584
YPL004C	4	91.3	3.51919	0	16	159.963
YHL021C	4	91.3	3.53628	0	8	19.7572
YDL104C	4	91.3	3.65685	1	4	85.2334
YJR121W	4	91.3	3.7252	0	10	194.29
YGR292W	4	91.3	3.72774	0	7	398.333
YMR081C	4	92.3	3.31746	0	13	146.558
YDR197W	4	92.3	3.53033	0	4	263.881
YPR184W	4	92.3	3.56866	0	16	261.615
YIL155C	4	92.3	3.67704	0	9	24.1439
YDR018C	4	92.3	3.6964	0	4	150.016
YFR014C	4	92.3	3.80996	0	6	83.421
YGR204C-A	4	92.3	4.05191	0	7	336.413
YBR033W	4	92.3	4.4307	0	2	90.5986
YNR002C	4	93.3	3.29121	0	14	234.555
YGR067C	4	93.3	3.30055	0	7	231.144
YJL103C	4	93.3	3.46212	0	10	69.2583
YBR112C	4	93.3	3.60412	0	2	139.737
YHR002W	4	93.3	3.69033	0	8	32.648
YNL274C	4	93.3	3.71035	0	14	45.2307
YDL079C	4	94.3	3.6977	1	4	97.3485
YKL093W	4	94.3	3.75949	0	11	100.472
YLR092W	4	94.3	4.39135	0	12	116.517
YKL087C	4	95.3	3.62813	0	11	105.444
YDR391C	4	95.3	4.29989	0	4	390.001
YKL148C	4	95.3	5.06611	0	11	65.0291
YHR116W	4	96.3	4.23331	0	8	102.504
YAL019W	4	124.3	3.73916	0	1	51.7181
YDR006C	4	138.3	16.0145	1	4	142.996
YJR120W	4	141.7	3.31928	0	10	194.145
YDR010C	4	141.7	3.44259	1	4	144.28
YDL007C-A	4	144.3	9.78734	1	4	135.433
YDL012C	4	145.3	10.3345	1	4	133.749
YBR002C	4	146.3	3.38813	0	2	72.7549
YDR033W	4	148.3	8.31938	1	4	157.556
YDL131W	4	150.3	3.86065	0	4	70.4669
YNL064C	4	152.3	3.29593	0	14	188.332
YNR050C	4	152.3	3.84129	0	14	264.692
YPL144W	4	152.3	3.8786	0	16	81.3524
YPL186C	4	152.3	4.07478	0	16	56.6518
YBR203W	4	153.3	3.93245	0	2	188.746
YML130C	4	154.3	4.00127	0	13	4.45185
YLR104W	4	155.3	3.81209	0	12	124.799
YDR034C	4	155.3	6.58781	1	4	158.786
YHL005C	4	156.3	4.59845	0	8	29.7777
YLR142W	4	158.3	3.61824	0	12	153.034
YBR087W	4	158.3	3.74659	0	2	127.112
YHR112C	4	159.3	3.96346	0	8	100.699
YDR038C	4	168.3	3.42125	1	4	164.556
YMR120C	4	174.3	3.4879	0	13	173.172
YDR089W	4	182.3	4.93598	1	4	192.861
YDR124W	4	213.3	8.09835	1	4	217.123
YDR126W	4	226.3	3.95482	1	4	218.028
YDR135C	4	232.3	4.49898	1	4	225.568
YDR132C	4	232.3	4.8045	1	4	223.321
YKL073W	4	235.3	3.37314	0	11	112.507
YDR140W	4	241.3	4.49388	1	4	227.611
YDR180W	4	251.3	3.54812	1	4	254.636
YDR182W-A	4	258.3	10.1172	1	4	257.065
YDR242W	4	281.3	3.38726	1	4	293.473
YCR043C	4	287.3	3.37638	0	3	99.2052
YDR265W	4	288.3	3.39712	0	4	309.629
YDR268W	4	289.3	4.84462	0	4	311.224
YDR264C	4	292.3	15.1357	1	4	309.461
YDR263C	4	293.3	4.4053	1	4	308.595
YDR262W	4	304.3	8.89518	1	4	307.85
YDR272W	4	318.3	4.16377	1	4	312.778
YIR017W-A	4	323.3	3.64001	0	9	172.631
YPR079W	4	324.3	3.73488	0	16	202.684
YMR304C-A	4	324.3	4.1701	0	13	298.919
YGR109C	4	329.3	3.54185	0	7	261.414
YDR294C	4	331.3	8.11775	1	4	326.154
YDR317W	4	347.3	7.82258	1	4	341.672
YDR364C	4	368.3	4.09029	1	4	373.298
YDR365C	4	368.7	6.09403	1	4	373.972
YDR366C	4	372.3	6.03445	1	4	375.973
YDR373W	4	374.3	8.05754	1	4	379.052
YOR174W	4	390.5	3.32377	0	15	217.37
YPR195C	4	414.3	3.41768	0	16	269.252
YDR261C	4	417.3	3.67848	0	4	303.528
YPL011C	4	419.3	3.42474	0	16	155.041
YDR440W	4	420.3	5.36767	1	4	416.157
YDR469W	4	424.3	3.51368	1	4	433.685
YHR144C	4	426.3	3.3916	0	8	116.656
YHR097C	4	436.3	3.65328	0	8	89.4793
YDR501W	4	448.3	5.04555	1	4	449.881
YHR218W	4	456.3	3.3695	0	8	167.449
YPL283C	4	460.3	3.45017	0	16	1.67518
YNL339C	4	461.3	3.52769	0	14	2.1885
YLR467W	4	461.3	3.67765	0	12	386.106
YLR465C	4	461.3	3.83312	0	12	384.25
YML133C	4	461.3	3.85126	0	13	1.26074
YLR463C	4	461.3	4.22716	0	12	384.057
YLL066C	4	461.3	4.44742	0	12	3.35931
YDR531W	4	461.3	5.72259	1	4	464.433
YHR219W	4	462.3	3.70422	0	8	168.097
YOR396W	4	462.3	4.15225	0	15	358.197
YLL067C	4	462.3	4.19966	0	12	1.36647
YDR545W	4	462.3	4.3567	1	4	473.139
YLR466W	4	462.3	4.50862	0	12	384.154
YFL066C	4	462.3	5.14261	0	6	1.21715
YLR466C-B	4	462.3	6.30985	0	12	385.819
YIL177C	4	463.3	3.31064	0	9	2.05285
YGR296W	4	463.3	3.74678	0	7	401.391
YEL077C	4	463.3	3.90701	0	5	1.41446
YPR204W	4	463.3	4.30362	0	16	273.983
YHL050C	4	464.3	3.53217	0	8	0.538511
YBL113C	4	464.6	3.59959	0	2	0.764066
YJL225C	4	464.6	3.60141	0	10	1.40605
YHR218W-A	4	464.6	3.84949	0	8	168.024
YEL075W-A	4	464.6	3.89383	0	5	1.68499
YDR539W	4	464.6	8.33789	1	4	468.73
YEL057C	5	10.6	6.19733	1	5	15.9851
YEL068C	5	10.6	7.86153	1	5	9.07234
YNR011C	5	30.6	3.57079	0	14	239.405
YEL041W	5	31.6	5.90554	1	5	26.5688
YKL163W	5	32.6	4.15851	0	11	54.884
YDR055W	5	36.6	4.5747	0	4	174.698
YKL216W	5	36.6	10.4574	0	11	9.62085
YOL143C	5	37.6	10.861	0	15	18.1558
YEL006W	5	38.6	3.62813	1	5	50.5614
YKR066C	5	40.6	3.84224	0	11	215.354
YEL009C-A	5	42.6	5.98164	1	5	47.9179
YOL126C	5	56.6	3.90677	0	15	27.366
YEL052W	5	65.6	3.76965	0	5	19.7846
YER029C	5	69.8	3.71381	1	5	74.6236
YER028C	5	74.6	4.78415	1	5	74.168
YER036C	5	88.6	5.75927	1	5	78.8334
YML056C	5	93.6	3.30198	0	13	55.5329
YER053C	5	99.6	3.5222	1	5	90.8933
YER070W	5	100.6	4.10207	1	5	104.659
YIL030C	5	113.6	3.78416	0	9	135.002
YNR050C	5	120.6	3.33624	0	14	264.692
YGR230W	5	122.6	3.28985	0	7	352.226
YOL058W	5	124.6	3.60085	0	15	72.3009
YIL011W	5	126.6	3.70248	0	9	150.216
YIR019C	5	130.7	4.1654	0	9	177.175
YER097W	5	130.7	5.44466	1	5	124.299
YFL051C	5	130.7	6.50584	0	6	14.6281
YMR265C	5	134.6	3.49722	0	13	271.259
YDR259C	5	134.6	8.72093	0	4	302.464
YOL151W	5	135.6	4.01339	0	15	14.378
YER114C	5	136.6	4.53455	1	5	137.811
YPR019W	5	162.6	4.50649	0	16	173.047
YKL115C	5	169	4.69319	0	11	84.6877
YKL130C	5	172.6	4.10204	0	11	74.4706
YER163C	5	177.6	5.55212	1	5	176.318
YDR376W	5	181.6	3.68797	0	4	380.312
YER168C	5	182.6	3.70778	1	5	182.916
YML121W	5	190.9	3.29809	0	13	9.12936
YER187W	5	190.9	3.7416	1	5	198.147
YLL065W	5	190.9	4.55298	0	12	4.17877
YAL069W	5	190.9	4.59197	0	1	0.125745
YNL337W	5	190.9	4.73453	0	14	2.64505
YDR543C	5	190.9	5.22691	0	4	472.709
YER188W	5	190.9	5.28015	1	5	198.781
YDR544C	5	190.9	5.30201	0	4	472.892
YCR108C	5	190.9	5.72391	0	3	151.753
YER180C	5	190.9	6.379	1	5	192.652
YDR406W-A	6	19.3	3.35642	0	4	397.962
YFL056C	6	19.3	7.61631	1	6	7.37203
YFL057C	6	19.3	7.87035	1	6	7.05122
YFL053W	6	22.3	6.42725	1	6	11.2102
YFL054C	6	28.3	5.29246	1	6	10.9047
YFL052W	6	30.3	4.61378	1	6	13.5197
YHR213W-B	6	30.3	4.66202	0	8	162.282
YDR498C	6	31.3	3.62223	0	4	448.528
YFL025C	6	34.3	4.10217	1	6	41.8449
YGL077C	6	36.3	4.56471	0	7	134.675
YDR143C	6	47.4	3.31926	0	4	230.629
YFL021W	6	47.4	9.22819	1	6	46.0367
YFL022C	6	58.3	3.48288	1	6	45.5777
YFL003C	6	83.3	4.01223	1	6	65.7972
YFR012W	6	83.3	6.99568	1	6	80.5411
YFR026C	6	102.3	4.52748	1	6	98.992
YFR025C	6	103.3	4.72998	1	6	98.2672
YFR054C	6	110.3	4.48156	1	6	124.548
YMR237W	6	111.8	3.56392	0	13	252.839
YOR109W	6	111.8	3.56899	0	15	173.359
YCR107W	7	9.9	3.40691	0	3	150.65
YCR105W	7	9.9	3.73453	0	3	148.337
YGL252C	7	14.9	7.23578	1	7	10.1522
YNL338W	7	20.9	5.18102	0	14	2.42158
YLL066W-B	7	20.9	5.88474	0	12	1.97494
YHR217C	7	21.9	5.9975	0	8	167.157
YJL146W	7	28.9	3.53883	0	10	43.0264
YGL207W	7	30.9	5.15946	1	7	36.6571
YGL208W	7	32.9	5.55562	1	7	36.0537
YGL204C	7	40.9	7.76839	1	7	41.4792
YGL197W	7	43.9	3.91936	1	7	46.1748
YMR150C	7	44.9	4.06468	0	13	191.264
YIL051C	7	47.9	3.60759	0	9	116.192
YJR002W	7	51.9	3.37101	0	10	131.673
YGL179C	7	51.9	3.88727	1	7	61.1091
YPR017C	7	52.9	3.67129	0	16	172.225
YDR530C	7	56.9	3.54168	0	4	464.289
YNR032C-A	7	57.9	3.84434	0	14	254.377
YGL154C	7	62.9	4.04326	1	7	79.9562
YPL084W	7	100	3.39906	0	16	114.291
YDR208W	7	104.9	3.34034	0	4	269.128
YHR103W	7	105.9	3.44637	0	8	96.1124
YPR176C	7	106.9	3.29771	0	16	258.714
YNL024C-A	7	106.9	4.20287	0	14	217.1
YML020W	7	107.9	3.44673	0	13	78.5596
YNL275W	7	107.9	3.45987	0	14	44.1581
YIR022W	7	107.9	3.92711	0	9	179.449
YIL006W	7	107.9	3.96453	0	9	154.87
YGR063C	7	107.9	6.08192	0	7	228.574
YPR181C	7	108.9	3.43947	0	16	260.923
YGR036C	7	108.9	3.633	0	7	206.807
YGL186C	7	108.9	3.72721	0	7	56.5593
YGL219C	7	108.9	3.97656	0	7	31.2047
YNL127W	7	108.9	4.03265	0	14	142.048
YOR132W	7	109.9	3.32638	0	15	189.123
YOL105C	7	109.9	3.73032	0	15	38.2234
YDR387C	7	109.9	4.10799	0	4	387.446
YCL002C	7	109.9	4.37993	0	3	53.543
YNL229C	7	110.9	3.46553	0	14	81.4638
YPR113W	7	110.9	3.91184	0	16	218.186
YDL212W	7	110.9	3.9173	0	4	24.2895
YOR085W	7	110.9	4.23884	0	15	159.074
YGR199W	7	111.9	3.32087	0	7	332.086
YDR404C	7	111.9	3.47044	0	4	395.912
YMR155W	7	111.9	3.81239	0	13	193.308
YMR292W	7	111.9	4.27191	0	13	290.627
YGR002C	7	111.9	4.30447	0	7	185.003
YPR129W	7	112.9	3.30033	0	16	229.898
YJL134W	7	112.9	3.30414	0	10	47.4966
YLR220W	7	112.9	3.35148	0	12	207.696
YMR274C	7	112.9	3.39479	0	13	277.177
YPL070W	7	112.9	3.41502	0	16	122.063
YBR102C	7	112.9	3.54565	0	2	134.192
YGR203W	7	112.9	3.83092	0	7	334.954
YMR088C	7	112.9	4.25874	0	13	151.326
YAR002C-A	7	112.9	4.37968	0	1	69.6059
YFR019W	7	112.9	4.43513	0	6	88.5291
YLR459W	7	113.9	3.29133	0	12	380.643
YJR117W	7	113.9	3.29269	0	10	192.605
YBR243C	7	113.9	3.58869	0	2	212.076
YOR067C	7	113.9	3.81897	0	15	149.62
YHR026W	7	113.9	4.45973	0	8	48.2192
YMR215W	7	113.9	5.3648	0	13	236.906
YHR181W	7	115.9	3.3256	0	8	140.163
YLR381W	7	115.9	3.69324	0	12	316.718
YGL112C	7	115.9	3.91472	1	7	110.921
YLR260W	7	115.9	3.93569	0	12	239.675
YGR202C	7	115.9	4.47616	0	7	334.772
YCR067C	7	115.9	4.50541	0	3	113.443
YLR369W	7	116.9	3.77898	0	12	309.467
YOR103C	7	116.9	4.19614	0	15	170.582
YHR151C	7	116.9	5.36878	0	8	120.301
YKR088C	7	117.9	5.06256	0	11	229.907
YHR133C	7	118.9	3.58445	0	8	111.505
YJL039C	7	121.7	3.56623	0	10	112.139
YDR326C	7	121.7	4.25023	0	4	348.752
YDR331W	7	122.9	3.60384	0	4	350.203
YDR330W	7	123.9	4.6327	0	4	349.669
YGL098W	7	125.9	4.38464	1	7	117.442
YDL017W	7	126.9	3.65776	0	4	131.528
YLR400W	7	126.9	3.85512	0	12	331.916
YCL032W	7	127.9	3.31434	0	3	30.4372
YFL042C	7	128.9	3.91887	0	6	22.8888
YOR034C	7	129.9	3.33867	0	15	131.02
YGR193C	7	129.9	3.55785	0	7	327.725
YLR347C	7	130.9	3.60232	0	12	297.516
YFR008W	7	130.9	4.39662	0	6	77.0122
YNR006W	7	130.9	4.8237	0	14	235.717
YHR061C	7	132.9	3.40529	0	8	66.749
YIL090W	7	132.9	3.43656	0	9	87.0794
YKL094W	7	133.9	4.98376	0	11	99.924
YGR100W	7	134.9	3.38969	0	7	255.38
YJL100W	7	134.9	4.42373	0	10	71.1685
YLR128W	7	135.9	3.47918	0	12	143.459
YDR439W	7	135.9	3.7275	0	4	415.281
YGL095C	7	136.9	3.28853	1	7	122.353
YER070W	7	136.9	4.10412	0	5	104.659
YGL066W	7	136.9	11.7678	1	7	139.74
YDL093W	7	137.9	4.3477	0	4	89.8833
YGL014W	7	137.9	4.50734	0	7	172.495
YGL060W	7	138.9	7.34533	1	7	144.349
YDR358W	7	140.9	3.57965	0	4	368.908
YMR226C	7	141.9	3.63202	0	13	245.592
YBR062C	7	142.9	3.60343	0	2	109.965
YMR070W	7	143.9	4.3724	0	13	139.088
YOR334W	7	145.6	3.70269	0	15	311.709
YJL053W	7	145.6	4.28489	0	10	100.783
YGR266W	7	149.9	3.36301	0	7	378.37
YAR031W	7	150.9	3.58751	0	1	84.0538
YKL031W	7	150.9	3.61536	0	11	145.073
YGL053W	7	150.9	15.237	1	7	148.981
YGL044C	7	152.9	6.5879	1	7	154.326
YGL052W	7	153.9	14.5413	1	7	149.295
YDL132W	7	154.9	4.70294	0	4	69.5057
YGL035C	7	161.9	6.05018	1	7	160.255
YBR042C	7	169.5	3.44811	0	2	96.5091
YGL017W	7	171.9	3.58894	1	7	170.166
YGL027C	7	172.9	3.33695	1	7	165.093
YGR012W	7	176.9	3.40935	1	7	189.913
YGR029W	7	200.9	10.3367	1	7	201.147
YGL005C	7	203.9	5.08379	0	7	181.536
YGR039W	7	210.9	15.9407	1	7	212.727
YGR040W	7	211.9	3.50372	1	7	212.916
YGL161C	7	214.9	3.6095	0	7	74.0587
YDR117C	7	228.9	3.37526	0	4	212.574
YOR264W	7	234.5	3.67134	0	15	270.251
YDR309C	7	234.5	4.08021	0	4	334.827
YJL133W	7	234.5	4.75938	0	10	48.2244
YGR065C	7	236.9	6.12322	1	7	229.325
YLR224W	7	256.9	4.05882	0	12	211.156
YBR301W	7	256.9	5.30269	0	2	242.696
YHR071W	7	259.9	3.54527	0	8	71.0944
YAR047C	7	261.9	3.35525	0	1	90.7818
YAR027W	7	266.9	3.33457	0	1	82.674
YER177W	7	272.4	3.54011	0	5	190.931
YOL144W	7	274.9	3.36373	0	15	17.4916
YDL150W	7	276.9	3.58888	0	4	56.8098
YBR149W	7	281.9	3.89138	0	2	162.025
YER091C	7	283.9	4.14407	0	5	119.766
YAL069W	7	286.9	3.56079	0	1	0.125745
YGL125W	7	288.9	4.86495	0	7	100.848
YLR180W	7	289.9	10.2481	0	12	185.512
YLL065W	7	290.9	3.45398	0	12	4.17877
YER043C	7	290.9	5.1368	0	5	83.0074
YCL030C	7	292.9	3.6099	0	3	32.7858
YDL025C	7	301.9	4.22532	0	4	126.265
YDR544C	7	303.9	3.42348	0	4	472.892
YDR391C	7	307.9	6.37103	0	4	390.001
YJR033C	7	311.9	3.56054	0	10	148.952
YDR306C	7	311.9	3.74415	0	4	333.262
YDR436W	7	316.9	3.55857	0	4	413.771
YGR184C	7	330.9	8.34549	1	7	320.321
YGR198W	7	331.9	3.57882	1	7	331.044
YGR208W	7	336.9	6.09577	1	7	337.418
YGR212W	7	343.9	6.48904	1	7	339.33
YGR238C	7	354.9	3.79422	1	7	358.425
YJL070C	7	357.9	5.1136	0	10	93.1822
YGR246C	7	363.9	4.05351	1	7	364.177
YOR117W	7	368.7	3.48973	0	15	179.859
YOR197W	7	372.9	4.28094	0	15	236.649
YLR257W	7	374.9	4.39809	0	12	237.151
YNL337W	7	378.9	3.87034	0	14	2.64505
YDR033W	7	387.9	3.69312	0	4	157.556
YGR287C	7	388.9	7.57092	1	7	395.518
YPL011C	7	391.5	3.30318	0	16	155.041
YBR298C	7	391.5	7.75755	0	2	241.321
YGR295C	7	391.5	8.61937	1	7	400.601
YGR289C	7	391.5	8.96017	1	7	398.042
YGR290W	7	391.5	15.1561	1	7	397.919
YHL035C	8	8.3	3.88079	1	8	9.8027
YHL042W	8	8.3	4.10892	1	8	4.67077
YIR043C	8	8.3	4.617	0	9	197
YPL092W	8	8.3	5.78513	0	16	108.436
YHL043W	8	8.3	7.30895	1	8	4.44087
YIR044C	8	8.3	8.04659	0	9	197.2
YHL048W	8	8.3	8.47092	1	8	1.89002
YLR350W	8	14.3	3.37391	0	12	298.352
YHL047C	8	15.3	3.61886	1	8	3.03383
YHL044W	8	15.3	4.00054	1	8	4.03988
YHL026C	8	16.3	5.17739	1	8	16.2411
YPL123C	8	18.3	3.50864	0	16	92.5362
YPL179W	8	18.3	3.66767	0	16	60.3414
YGR210C	8	19.3	3.33229	0	7	338.476
YOR219C	8	19.3	4.2656	0	15	249.166
YBR016W	8	19.3	4.2697	0	2	81.0723
YPL128C	8	20.3	3.3513	0	16	89.4182
YDR319C	8	20.3	3.43873	0	4	342.806
YLR187W	8	20.3	3.47021	0	12	188.975
YGR278W	8	20.3	3.47978	0	7	387.28
YPL154C	8	20.3	4.72005	0	16	75.6694
YPL188W	8	20.3	5.07712	0	16	55.488
YBL039W-B	8	20.3	5.19577	0	2	43.0487
YPL218W	8	21.3	3.5966	0	16	40.2065
YMR295C	8	22.3	3.57505	0	13	292.022
YBR030W	8	22.3	3.5774	0	2	89.501
YPL241C	8	22.3	3.98093	0	16	27.8411
YGL006W	8	23.3	3.8791	0	7	179.823
YPL152W	8	23.3	4.05455	0	16	76.8596
YDR261C	8	23.3	4.41547	0	4	303.528
YPL098C	8	24.3	3.78953	0	16	105.809
YHL008C	8	24.3	20.4486	1	8	28.3681
YPL140C	8	25.3	3.42379	0	16	83.8395
YPR195C	8	27.3	3.55628	0	16	269.252
YCR038W-A	8	27.4	3.66407	0	3	95.6761
YJL166W	8	27.4	4.19785	0	10	31.9319
YEL007W	8	28.3	6.76974	0	5	49.7108
YHL007C	8	28.3	7.69087	1	8	29.3938
YKL048C	8	31.3	4.12492	0	11	132.55
YNL187W	8	31.3	5.68198	0	14	106.545
YNR069C	8	32.3	3.57853	0	14	282.139
YFL016C	8	32.3	3.85681	0	6	50.9626
YPL229W	8	32.3	4.52136	0	16	33.9197
YHL009C	8	33.3	4.05327	1	8	25.531
YPL271W	8	34.3	5.93287	0	16	8.70622
YOR191W	8	35.3	3.33494	0	15	228.526
YML061C	8	36.3	3.6737	0	13	51.5373
YLR195C	8	36.3	4.14315	0	12	195.625
YER177W	8	37.3	3.96256	0	5	190.931
YDR128W	8	37.3	4.07486	0	4	219.986
YBL061C	8	39.3	6.33318	0	2	32.2331
YHR034C	8	41.3	4.61742	1	8	53.3732
YBR196C	8	42.3	3.39142	0	2	184.157
YOR239W	8	44.3	3.35449	0	15	259.022
YEL027W	8	44.3	3.68232	0	5	35.2767
YHR031C	8	48.3	5.45345	1	8	51.8599
YHR033W	8	49.3	5.13699	1	8	52.6356
YBL084C	8	49.7	4.61986	0	2	20.8215
YHR021W-A	8	49.7	11.8494	1	8	44.742
YHR064C	8	59.3	4.66023	1	8	68.1439
YHR035W	8	60.3	4.78208	1	8	53.4394
YHR056C	8	62.3	7.59178	1	8	65.3598
YHR054C	8	63.3	7.75295	1	8	64.2837
YHR058C	8	64.9	5.36084	1	8	65.973
YHR065C	8	64.9	6.53375	1	8	68.7111
YHR054W-A	8	64.9	8.29685	1	8	64.3617
YHR052W-A	8	64.9	9.01222	1	8	63.7605
YJR062C	8	121.2	3.61631	0	10	166.433
YHL019C	8	153.3	3.30647	0	8	20.8665
YHR211W	8	153.3	11.0108	1	8	157.658
YDL113C	8	155.3	3.42542	0	4	80.1634
YOL057W	8	156	3.33851	0	15	72.8154
YIR015W	8	156	3.98325	0	9	171.903
YLR117C	8	156	4.20798	0	12	138.432
YJL222W	9	13.9	3.7631	0	10	3.47369
YIL173W	9	13.9	3.80899	1	9	5.15574
YAR068W	9	13.9	6.40937	0	1	100.06
YHR214W-A	9	13.9	6.88652	0	8	162.945
YIL166C	9	13.9	18.7313	1	9	14.6399
YIL158W	9	17.9	3.76615	1	9	20.7693
YIL163C	9	18.9	6.17136	1	9	16.7464
YOL012C	9	40.8	3.63375	0	15	100.306
YNL170W	9	44.9	3.43969	0	14	116.942
YIL119C	9	62.9	8.10907	1	9	62.0178
YIL116W	9	72.9	8.91718	1	9	64.2925
YIL083C	9	98.7	5.79741	1	9	92.0508
YIL089W	9	101.9	6.69684	1	9	87.9803
YIL087C	9	102.9	7.38338	1	9	90.0124
YIL082W-A	9	104.9	3.9938	1	9	92.4923
YIL061C	9	105.9	4.05488	1	9	110.462
YIL100W	9	106.9	4.45208	0	9	79.7864
YIL065C	9	115.9	3.56089	1	9	108.757
YIL059C	9	116.9	4.80147	1	9	111.072
YIL014C-A	9	139.9	11.499	1	9	146.516
YGL141W	9	142.9	3.44069	0	7	88.197
YDR047W	9	151.9	3.35351	0	4	171.097
YDL179W	9	152.9	3.35215	0	4	42.8557
YDR505C	9	167.9	3.50921	0	4	452.324
YIR032C	9	176.9	5.45541	1	9	187.045
YGL259W	9	179.9	8.23631	0	7	3.11632
YIR019C	9	180.9	3.68198	1	9	177.175
YIR026C	9	182.7	4.28392	1	9	182.702
YIR031C	9	182.7	12.7652	1	9	186.623
YIR039C	9	182.7	17.5484	1	9	194.468
YIR042C	9	182.7	17.974	1	9	196.212
YFL055W	10	10.4	3.37871	0	6	8.12746
YJL219W	10	10.4	3.97231	1	10	5.87963
YJL222W	10	10.4	4.38958	1	10	3.47369
YIL173W	10	10.4	4.43911	0	9	5.15574
YJL217W	10	10.4	6.57719	1	10	6.97014
YJL218W	10	10.4	6.96086	1	10	6.62223
YJL216C	10	10.4	8.32169	1	10	7.85579
YJL215C	10	10.4	9.34168	1	10	8.06124
YHL043W	10	14.4	3.55774	0	8	4.44087
YHL042W	10	14.4	4.12946	0	8	4.67077
YJL179W	10	23.4	5.33366	1	10	26.6248
YJL171C	10	28.4	3.71656	1	10	30.2644
YJL163C	10	28.4	5.21862	1	10	34.009
YJL181W	10	34.4	5.88542	1	10	25.689
YJL161W	10	51.4	3.82542	1	10	35.1865
YJL121C	10	52.4	6.60886	1	10	57.3475
YJL132W	10	58.4	5.18043	1	10	48.6121
YOR349W	10	59.4	3.40529	0	15	326.642
YJR103W	10	59.4	3.6643	0	10	186.209
YJL108C	10	59.4	3.91945	1	10	65.6591
YJL119C	10	61.4	3.44954	1	10	57.5885
YMR087W	10	67.4	4.89285	0	13	150.45
YJL107C	10	71.4	5.81596	1	10	66.0063
YMR306C-A	10	81.4	3.37072	0	13	301.455
YJL077W-B	10	83.1	4.30806	1	10	88.1908
YNL085W	10	92.4	3.30413	0	14	173.032
YJL056C	10	102.4	3.37539	1	10	99.9326
YDL008W	10	108.4	3.43951	0	4	134.403
YJL070C	10	115.4	3.83384	0	10	93.1822
YLR130C	10	125.4	4.52858	0	12	145.446
YJR010C-A	10	133.4	5.69183	1	10	137.541
YJR015W	10	138.4	9.47482	1	10	138.853
YJR024C	10	146.4	3.82568	1	10	141.322
YJR025C	10	155.4	5.39937	1	10	141.533
YJR032W	10	155.4	6.06381	1	10	147.344
YJR056C	10	158.4	8.609	1	10	162.738
YJR061W	10	159.4	5.68681	1	10	165.135
YJR055W	10	161.4	3.8082	1	10	161.621
YJR060W	10	162.4	9.5133	1	10	164.61
YJR062C	10	166.4	6.31611	1	10	166.433
YJR094W-A	10	169.4	3.92143	1	10	182.464
YJR094C	10	174.4	9.15787	1	10	181.666
YJR082C	10	176.3	4.17178	1	10	174.635
YJR104C	10	176.3	4.17447	1	10	186.889
YJR084W	10	176.3	4.7499	1	10	175.077
YJR112W-A	10	176.3	6.53227	1	10	191.336
YJR108W	10	176.3	12.6443	1	10	188.604
YJR127C	10	201.4	4.4696	1	10	198.923
YJR128W	10	201.4	7.49975	1	10	198.882
YDL246C	10	207.4	5.2993	0	4	2.98121
YJR159W	10	209.4	6.52945	1	10	220.782
YJR161C	10	212.4	9.91242	1	10	223.168
YFL060C	10	213.6	3.37148	0	6	5.22915
YNL335W	10	213.6	3.41208	0	14	4.23116
YNL334C	10	213.6	3.64124	0	14	4.75801
YDL247W-A	10	213.6	3.70909	0	4	1.12296
YDL247W	10	213.6	3.94652	0	4	1.81213
YJR160C	10	213.6	3.97081	1	10	221.913
YKL201C	11	22.6	3.96279	1	11	25.637
YKL187C	11	41.6	4.71787	1	11	34.7617
YKL167C	11	54.6	3.65402	1	11	50.976
YKL110C	11	61.6	4.06079	0	11	87.1957
YJL206C	11	66.6	3.79141	0	10	14.9985
YKL115C	11	79.6	4.65314	1	11	84.6877
YKL130C	11	79.6	8.70683	1	11	74.4706
YNL151C	11	83.6	3.46125	0	14	128.976
YKL114C	11	86.6	5.11714	1	11	85.1326
YKL068W-A	11	89.6	5.26654	0	11	117.366
YKL096W	11	101.5	3.77748	1	11	99.0809
YJL093C	11	103.6	4.85536	0	10	77.0195
YKL066W	11	124.6	3.94146	1	11	119.677
YHR201C	11	124.6	4.14871	0	8	150.366
YDR460W	11	126.6	3.39685	0	4	428.985
YKL148C	11	128.6	3.51707	0	11	65.0291
YML074C	11	129.6	3.64022	0	13	41.2741
YCR016W	11	132.6	3.39474	0	3	68.9521
YKL049C	11	135.6	3.40721	1	11	131.648
YOR148C	11	136.6	3.38638	0	15	201.004
YKL128C	11	136.6	4.63812	0	11	76.5141
YKL041W	11	138.6	3.50475	1	11	136.735
YGR045C	11	139.6	3.46175	0	7	216.2
YHL035C	11	140.6	3.37661	0	8	9.8027
YGL036W	11	140.6	4.02058	0	7	158.604
YLR422W	11	140.6	5.57588	0	12	347.702
YCL057W	11	141.6	3.41263	0	3	11.8713
YPR051W	11	142.6	3.40995	0	16	192.836
YGL061C	11	142.6	3.42556	0	7	144.217
YJR119C	11	142.6	3.58845	0	10	193.953
YIL129C	11	144.6	3.79516	0	9	50.9225
YKL024C	11	147.2	3.76761	1	11	149.276
YKL025C	11	147.2	4.24298	1	11	148.95
YLR203C	11	153.6	3.62648	0	12	198.746
YKR098C	11	155.6	3.288	0	11	241.242
YLR323C	11	155.6	3.32933	0	12	280.429
YHR037W	11	155.6	5.07239	0	8	54.5702
YLR142W	11	156.6	3.79462	0	12	153.034
YBR203W	11	159.6	3.3731	0	2	188.746
YKL022C	11	159.6	3.70066	1	11	150.834
YEL019C	11	162.6	4.84597	0	5	42.4846
YKL006C-A	11	165.6	6.42037	1	11	163.429
YML076C	11	174.6	3.48732	0	13	39.2412
YPR021C	11	180.6	3.46133	0	16	174.964
YHR009C	11	180.6	3.66121	0	8	37.6962
YKL064W	11	180.6	4.03065	0	11	120.621
YKL222C	11	181.6	3.3252	0	11	2.17562
YBR218C	11	182.6	3.42291	0	2	198.689
YKR017C	11	186.6	3.28564	1	11	179.708
YKR031C	11	194.7	6.99044	1	11	192.254
YKR021W	11	203.6	3.47103	0	11	181.942
YPR002W	11	209.6	3.46731	0	16	161.916
YKR068C	11	213.6	5.21749	1	11	216.764
YKR089C	11	227.6	4.52376	1	11	231.03
YKR080W	11	229.6	3.60588	1	11	224.184
YKR087C	11	230.6	3.61153	1	11	229.455
YCL074W	11	240.8	3.3129	0	3	1.33803
YLL054C	12	17	6.13487	1	12	12.6313
YLR227C	12	31.4	3.34526	0	12	213.158
YML006C	12	37	3.43436	0	13	87.8243
YFL047W	12	56	4.05143	0	6	19.3734
YLL006W	12	63	3.52599	1	12	49.1227
YLR053C	12	90	6.88942	1	12	89.4462
YKL080W	12	91	3.53382	0	11	108.17
YLR050C	12	100	4.71113	1	12	88.5974
YLR063W	12	102	4.64987	1	12	95.1182
YHR108W	12	103	3.53374	0	8	98.4852
YLR093C	12	123	4.12974	1	12	117.855
YLR091W	12	127	5.11614	1	12	116.068
YNR065C	12	138	3.70857	0	14	278.849
YJL222W	12	142	4.27374	0	10	3.47369
YIL173W	12	143	4.24269	0	9	5.15574
YJL217W	12	145	3.91434	0	10	6.97014
YJL219W	12	145	4.00813	0	10	5.87963
YJL216C	12	146	4.02686	0	10	7.85579
YJL218W	12	146	4.2513	0	10	6.62223
YLR152C	12	149	4.53823	1	12	160.048
YFL055W	12	157.9	3.4211	0	6	8.12746
YDL243C	12	157.9	4.62583	0	4	5.71247
YLR169W	12	167	3.9447	1	12	180.128
YLR165C	12	175	7.61365	1	12	178.296
YLR156W	12	175	12.616	1	12	169.944
YLR159W	12	175	13.1158	1	12	174.719
YLR160C	12	176	12.043	1	12	175.42
YLR157C	12	176	12.0915	1	12	170.646
YLR158C	12	176	12.2841	1	12	174.103
YLR155C	12	176	12.3026	1	12	169.328
YLR157W-D	12	176	12.3394	1	12	171.262
YLR161W	12	176	12.7745	1	12	176.037
YLR157W-E	12	176	13.8583	1	12	173.466
YLR179C	12	178	7.78766	1	12	185.314
YKL201C	12	192	4.32082	0	11	25.637
YLR215C	12	204	3.46443	1	12	205.913
YHR177W	12	213	3.54902	0	8	136.981
YGL055W	12	216	3.95597	0	7	147.516
YIL111W	12	218	4.17396	0	9	69.8279
YDR270W	12	218	4.482	0	4	311.743
YJL100W	12	220	4.32783	0	10	71.1685
YOR334W	12	220	4.69727	0	15	311.709
YLL012W	12	220	6.00942	0	12	45.1446
YML008C	12	220	7.00325	0	13	85.9806
YNR019W	12	220	9.18573	0	14	246.201
YLR100W	12	220	10.0243	0	12	123.084
YPR193C	12	221	3.48061	0	16	267.826
YKL020C	12	221	3.64325	0	11	152.667
YIL001W	12	221	4.42024	0	9	159.311
YBR242W	12	221	4.68056	0	2	211.438
YPL028W	12	221	7.88506	0	16	144.416
YMR202W	12	221	8.74059	0	13	226.982
YLR241W	12	223	5.28321	1	12	223.363
YPR065W	12	224	3.80599	0	16	197.111
YGR234W	12	224	10.4321	0	7	355.183
YMR208W	12	224	10.7274	0	13	232.724
YDL178W	12	225.5	3.36639	0	4	43.2374
YGL160W	12	225.5	3.82696	0	7	74.2135
YLR300W	12	225.5	5.83378	0	12	262.428
YDR297W	12	225.5	7.42962	0	4	327.491
YDR502C	12	226	7.1582	0	4	450.847
YLR244C	12	230	12.2926	1	12	225.466
YHR190W	12	231	11.7981	0	8	145.462
YLR038C	12	232	5.85784	0	12	81.0616
YLR245C	12	232	6.6012	1	12	225.681
YER011W	12	233	3.96908	0	5	61.3626
YNR043W	12	233	10.6797	0	14	259.708
YML075C	12	233	12.8732	0	13	40.449
YMR015C	12	233	13.0411	0	13	102.807
YLR205C	12	233	18.018	0	12	199.365
YDL093W	12	234	3.40813	0	4	89.8833
YNR007C	12	234	3.84447	0	14	236.878
YER014W	12	234	3.92635	0	5	63.9308
YNL231C	12	234	4.58228	0	14	80.2966
YMR220W	12	234	10.6625	0	13	242.171
YLR153C	12	234	15.4243	0	12	161.09
YAL028W	12	235	4.6775	0	1	41.8266
YHR001W-A	12	235	5.23749	0	8	32.353
YHR051W	12	235	5.33898	0	8	62.914
YMR256C	12	235	5.99379	0	13	264.86
YGL001C	12	235	10.1613	0	7	183.742
YJR048W	12	235	15.5803	0	10	157.899
YLR228C	12	236	3.83826	1	12	216.898
YOR348C	12	236	4.78263	0	15	326.309
YBR182C-A	12	236	6.87228	0	2	178.644
YGR266W	12	236	9.25214	0	7	378.37
YGL101W	12	236	13.3472	0	7	115.536
YGR049W	12	236	13.5528	0	7	218.79
YLR256W	12	236	16.1003	1	12	232.688
YMR145C	12	237	6.2266	0	13	189.209
YEL039C	12	237	7.40029	0	5	27.9811
YOR065W	12	237	7.73765	0	15	147.632
YJL048C	12	237	8.63129	0	10	104.608
YGL191W	12	237	9.97727	0	7	53.6141
YMR134W	12	237	10.0253	0	13	182.884
YPR010C-A	12	237	10.7475	0	16	168.929
YNL156C	12	237	12.1754	0	14	126.56
YDL174C	12	237	14.1782	0	4	45.7388
YIL121W	12	237	17.3541	0	9	59.481
YGR182C	12	238	5.00415	0	7	317.785
YHR072W	12	238	8.46145	0	8	71.7208
YNL052W	12	238	8.66602	0	14	197.173
YPR151C	12	238	19.8906	0	16	241.18
YKL038W	12	239	4.24166	0	11	138.812
YDL086W	12	239	10.6857	0	4	93.4416
YML126C	12	239	12.1906	0	13	6.95502
YER044C	12	239	12.3981	0	5	83.3215
YML054C	12	239	17.4067	0	13	56.8901
YKL008C	12	240	3.29368	0	11	162.707
YMR080C	12	240	4.08545	0	13	146.058
YJL044C	12	240	4.2553	0	10	107.912
YLR255C	12	240	4.27104	1	12	232.522
YMR070W	12	240	5.50211	0	13	139.088
YGL187C	12	240	5.84341	0	7	55.5969
YLR231C	12	240	6.30622	0	12	218.57
YOR317W	12	240	6.82526	0	15	300.079
YBR183W	12	240	6.92333	0	2	178.812
YER053C-A	12	240	11.6842	0	5	91.386
YKR046C	12	240	14.898	0	11	199.349
YBR085W	12	241	5.15676	0	2	124.773
YDR529C	12	241	5.49831	0	4	463.911
YGR183C	12	241	5.75908	0	7	317.917
YML057W	12	242	8.56221	0	13	54.4716
YFR033C	12	242	9.20065	0	6	107.895
YJL167W	12	242	9.87998	0	10	31.5045
YEL024W	12	243	8.78657	0	5	37.5554
YPR191W	12	244	3.43945	0	16	266.664
YHR048W	12	244	3.83303	0	8	61.3797
YER053C	12	246	3.39708	0	5	90.8933
YGL122C	12	247.4	4.37963	0	7	103.811
YOR360C	12	247.4	4.40171	0	15	334.898
YDL110C	12	247.4	4.80375	0	4	82.1577
YML081W	12	247.4	5.37032	0	13	35.6459
YNL100W	12	247.4	5.81981	0	14	161.927
YDR384C	12	248	3.84321	0	4	385.03
YDR186C	12	248	4.1247	0	4	259.023
YLR395C	12	249	5.82031	0	12	327.573
YEL034W	12	250	4.86235	0	5	29.9782
YLR034C	12	251	4.00603	0	12	76.288
YGL040C	12	252	4.7146	0	7	155.628
YER141W	12	253	3.30921	0	5	158.738
YPL189C-A	12	253	3.85939	0	16	54.6505
YKR047W	12	253	4.61451	0	11	199.418
YDL244W	12	253	4.69533	0	4	4.98021
YEL047C	12	253	4.92054	0	5	23.3656
YJR156C	12	253	5.73365	0	10	218.848
YDR111C	12	254	4.76478	0	4	210.751
YML125C	12	254	7.93447	0	13	7.35085
YFL058W	12	255	4.73606	0	6	6.17044
YNL332W	12	255	5.50351	0	14	5.48169
YNL111C	12	255	10.2249	0	14	154.395
YHR007C	12	257	5.66874	0	8	36.5
YPR150W	12	258	3.72355	0	16	240.984
YDR143C	12	258	5.1006	0	4	230.629
YLR282C	12	260	3.51974	1	12	253.929
YMR322C	12	260	4.44791	0	13	312.512
YMR009W	12	260	6.60312	0	13	96.5545
YOR391C	12	261	3.65534	0	15	356.145
YPL280W	12	261	4.42543	0	16	3.42924
YER042W	12	261	5.03094	0	5	82.2433
YMR252C	12	262	3.6555	0	13	263.7
YLR290C	12	262	3.89059	1	12	258.465
YPL170W	12	262	4.90844	0	16	66.1959
YLR313C	12	268.3	5.03291	1	12	274.456
YLR299W	12	268.3	11.0507	1	12	261.386
YLL062C	12	269	3.50978	0	12	6.29835
YPL117C	12	274	4.09646	0	16	95.3789
YLR329W	12	281	3.50618	1	12	283.122
YLR352W	12	283	3.38937	1	12	299.212
YLR375W	12	311.8	4.86456	1	12	313.837
YLR411W	12	343	14.2113	1	12	340.985
YLR460C	12	376.1	3.32868	1	12	381.922
YLR457C	12	376.1	6.64182	1	12	380.44
YPL018W	13	9.6	3.38407	0	16	150.092
YHR214C-E	13	9.6	3.38994	0	8	165.493
YOR033C	13	9.6	3.54125	0	15	130.175
YPL072W	13	9.6	3.56803	0	16	121.359
YML119W	13	9.6	3.59313	1	13	10.3827
YER078W-A	13	9.6	3.67289	0	5	111.549
YGR233C	13	9.6	3.8009	0	7	354.557
YJL012C	13	9.6	4.07951	0	10	124.01
YER072W	13	9.6	4.45222	0	5	106.009
YAR069C	13	9.6	4.55989	0	1	100.914
YIR006C	13	9.6	5.1262	0	9	166.49
YGR156W	13	9.6	5.32443	0	7	296.189
YAR071W	13	9.6	5.45741	0	1	101.434
YBR296C	13	9.6	5.62405	0	2	239.535
YHR215W	13	9.6	5.85209	0	8	165.673
YDR281C	13	9.6	5.93918	0	4	316.902
YHR136C	13	9.6	6.26032	0	8	112.558
YBR093C	13	9.6	7.40217	0	2	129.272
YML123C	13	9.6	8.51656	1	13	8.74543
YOR366W	13	10.6	3.34867	0	15	338.337
YDL154W	13	11.6	3.86022	0	4	55.259
YML096W	13	19.6	3.94637	1	13	27.1812
YOL123W	13	20.6	3.93301	0	15	28.9938
YCR038W-A	13	20.6	4.55457	0	3	95.6761
YLR438W	13	21.6	7.399	0	12	364.492
YML089C	13	22.6	3.42901	1	13	31.099
YMR120C	13	25.6	3.51424	0	13	173.172
YLR437C-A	13	29.6	4.18931	0	12	364.559
YPL111W	13	32.6	8.31511	0	16	98.6284
YHR112C	13	41.6	3.87048	0	8	100.699
YEL009C	13	41.6	4.22382	0	5	48.9658
YML076C	13	43.6	12.3449	1	13	39.2412
YBR125C	13	52.6	3.55623	0	2	146.532
YML057W	13	54.6	4.11055	1	13	54.4716
YNL037C	13	57.6	3.38705	0	14	206.932
YLR142W	13	57.6	5.83635	0	12	153.034
YKR090W	13	59.6	4.59659	0	11	231.251
YML043C	13	62.6	4.67399	1	13	65.1891
YMR214W	13	66.6	3.45443	0	13	236.416
YML016C	13	79.6	5.64208	1	13	82.0888
YML012C-A	13	81.6	4.95294	1	13	83.5764
YBR203W	13	86.6	3.84016	0	2	188.746
YML002W	13	92.6	10.6393	1	13	89.9054
YML003W	13	93.4	4.98348	1	13	89.5459
YMR006C	13	93.4	13.0371	1	13	95.0512
YML015C	13	97.6	5.37707	1	13	82.5961
YBR077C	13	98.6	4.39965	0	2	117.673
YGL167C	13	103.6	4.13948	0	7	70.4846
YMR023C	13	107.6	3.83757	1	13	109.109
YMR055C	13	128.6	5.07393	1	13	131.558
YIL032C	13	136	3.53639	0	9	131.531
YMR059W	13	136.6	4.37671	1	13	132.945
YMR124W	13	165.6	4.94998	1	13	174.934
YMR199W	13	215.6	4.99997	1	13	225.322
YHR039C	13	248.6	3.41569	0	8	56.0242
YMR247W-A	13	259.6	4.89458	1	13	261.509
YMR244C-A	13	264.6	5.23613	1	13	257.957
YLR324W	13	270.6	3.86675	0	12	280.523
YDR331W	13	275.6	3.73094	0	4	350.203
YMR259C	13	275.6	5.08569	1	13	268.181
YAL044W-A	13	276.6	3.33428	0	1	25.886
YDR279W	13	277.6	3.35016	0	4	315.988
YPL016W	13	278.6	3.54507	0	16	151.068
YFR009W-A	13	279.6	4.48916	0	6	78.6146
YGL194C-A	13	279.6	5.07392	0	7	51.8211
YBR097W	13	282	3.28843	0	2	131.075
YDR457W	13	282	3.33633	0	4	424.645
YEL021W	13	282	3.38414	0	5	40.6823
YLR236C	13	282	3.39943	0	12	220.364
YFR009W	13	282	3.40986	0	6	77.9491
YNL233W	13	282	3.41207	0	14	78.4049
YPR189W	13	282	3.4596	0	16	264.708
YKL163W	13	282	3.47371	0	11	54.884
YBR254C	13	282	3.48413	0	2	217.316
YBL034C	13	282	3.54194	0	2	47.5499
YER105C	13	282	3.55486	0	5	130.193
YCR002C	13	282	3.78543	0	3	56.8049
YDR283C	13	282	3.88483	0	4	319.293
YDL132W	13	282	3.95576	0	4	69.5057
YOL076W	13	282	4.04791	0	15	61.6879
YGL223C	13	282	4.24894	0	7	29.7615
YMR076C	13	282	5.13702	0	13	142.79
YGL220W	13	282.6	3.45886	0	7	30.5064
YGL151W	13	282.6	3.95588	0	7	80.4849
YIL053W	13	282.6	4.47004	0	9	114.766
YKR001C	13	282.6	4.48675	0	11	168.082
YJL207C	13	282.6	5.77415	0	10	14.2497
YGL231C	13	283.6	3.39166	0	7	23.5523
YDR505C	13	283.6	3.48334	0	4	452.324
YDR484W	13	283.6	3.70546	0	4	441.028
YPL065W	13	284.6	3.55413	0	16	124.078
YDR166C	13	284.6	3.90336	0	4	244.69
YDL116W	13	284.6	3.97271	0	4	77.9887
YBL051C	13	284.6	4.48995	0	2	37.4485
YDR495C	13	284.6	5.37558	0	4	446.714
YJL204C	13	285.6	3.46067	0	10	15.9609
YHL006C	13	285.6	3.5057	0	8	29.6505
YGR133W	13	285.6	3.82695	0	7	280.078
YLL032C	13	285.6	4.74531	0	12	27.5843
YOL147C	13	286.6	3.40767	0	15	16.0166
YDR141C	13	286.6	3.47011	0	4	229.427
YEL022W	13	286.6	3.95678	0	5	39.0161
YDR080W	13	286.6	4.0261	0	4	187.235
YJR005W	13	286.6	4.0775	0	10	133.797
YLR148W	13	286.6	4.394	0	12	156.43
YNL041C	13	286.6	4.3961	0	14	204.422
YPR055W	13	287.6	3.4769	0	16	193.624
YPR161C	13	287.6	3.62514	0	16	251.243
YOR046C	13	287.6	3.68127	0	15	137.229
YPL171C	13	287.6	3.69946	0	16	65.922
YGL207W	13	288.6	3.83225	0	7	36.6571
YKR008W	13	288.6	4.15884	0	11	171.679
YER021W	13	288.6	4.33645	0	5	68.9428
YHR027C	13	289.6	3.38668	0	8	49.3765
YDR180W	13	289.6	3.89946	0	4	254.636
YIL076W	13	290.6	3.78683	0	9	97.4479
YPR089W	13	291.6	3.31013	0	16	206.871
YLR398C	13	291.6	3.80161	0	12	330.823
[truncated: 453 more rows]

## Sheet: MS EtOH Response
UID	peaks.chr	peaks.pos	peaks.lod	cis (+/- 20 cM)	trait.chr	trait.pos
[truncated: 1,208 more rows]

[truncated: 3 more sheets: YS Basal, YS EtOH Abundance, YS EtOH Response]
