# Supplementary material for: Genetic Architecture of Ethanol-Responsive Transcriptome Variation in Saccharomyces cerevisiae Strains
Source: Oxford University Press journal article supplement (doi:10.1534/genetics.114.167429), 2014-06-26
Supplement: genetics.114.167429-11.pdf [file genetics.114.167429-11.pdf]

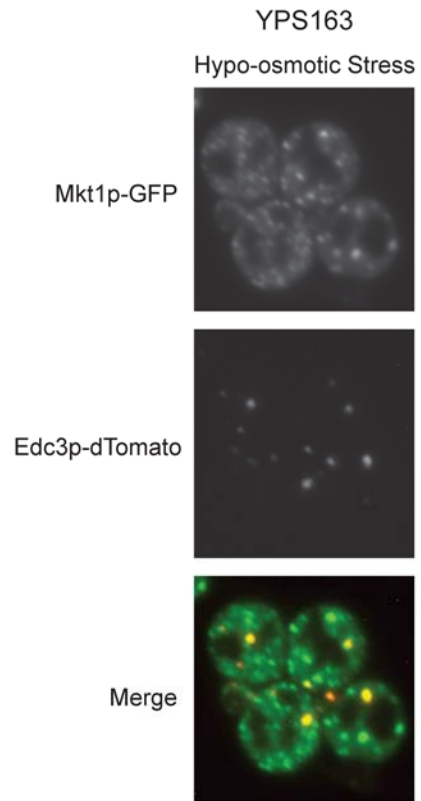

**Figure S4** YPS\_Mkt1p-GFP co-localizes to P-bodies during hypo-osmotic stress. Localization of Mkt1p-GFP and Edc3p-dTomato was observed via fluorescence microscopy following resuspension of cells in water for 30 min.
