# Supplementary material for: Genetic Architecture of Ethanol-Responsive Transcriptome Variation in Saccharomyces cerevisiae Strains
Source: Oxford University Press journal article supplement (doi:10.1534/genetics.114.167429), 2014-06-26
Supplement: genetics.114.167429-12.pdf [file genetics.114.167429-12.pdf]

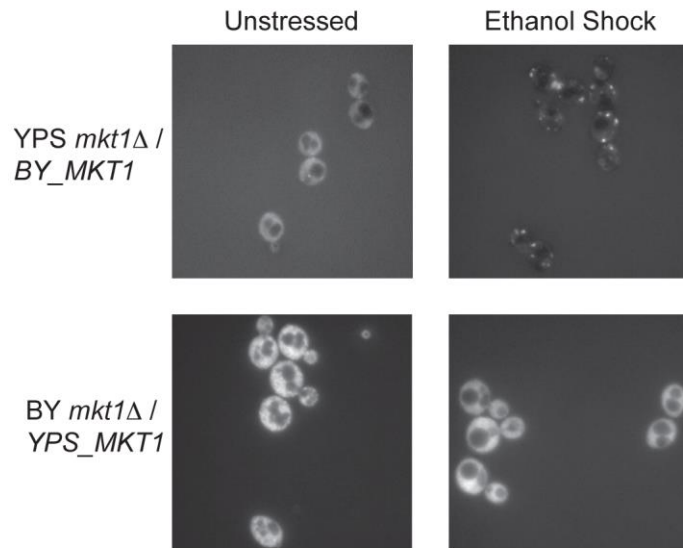

**Figure S3** Reciprocal Hemizyosity analysis of Mkt1p-GFP localization. Localization of Mkt1p-GFP was observed via fluorescent microscopy before and after 30 min treatment with 5% ethanol.
