# Supplementary material for: Genetic Architecture of Ethanol-Responsive Transcriptome Variation in Saccharomyces cerevisiae Strains
Source: Oxford University Press journal article supplement (doi:10.1534/genetics.114.167429), 2014-06-26
Supplement: genetics.114.167429-13.pdf [file genetics.114.167429-13.pdf]

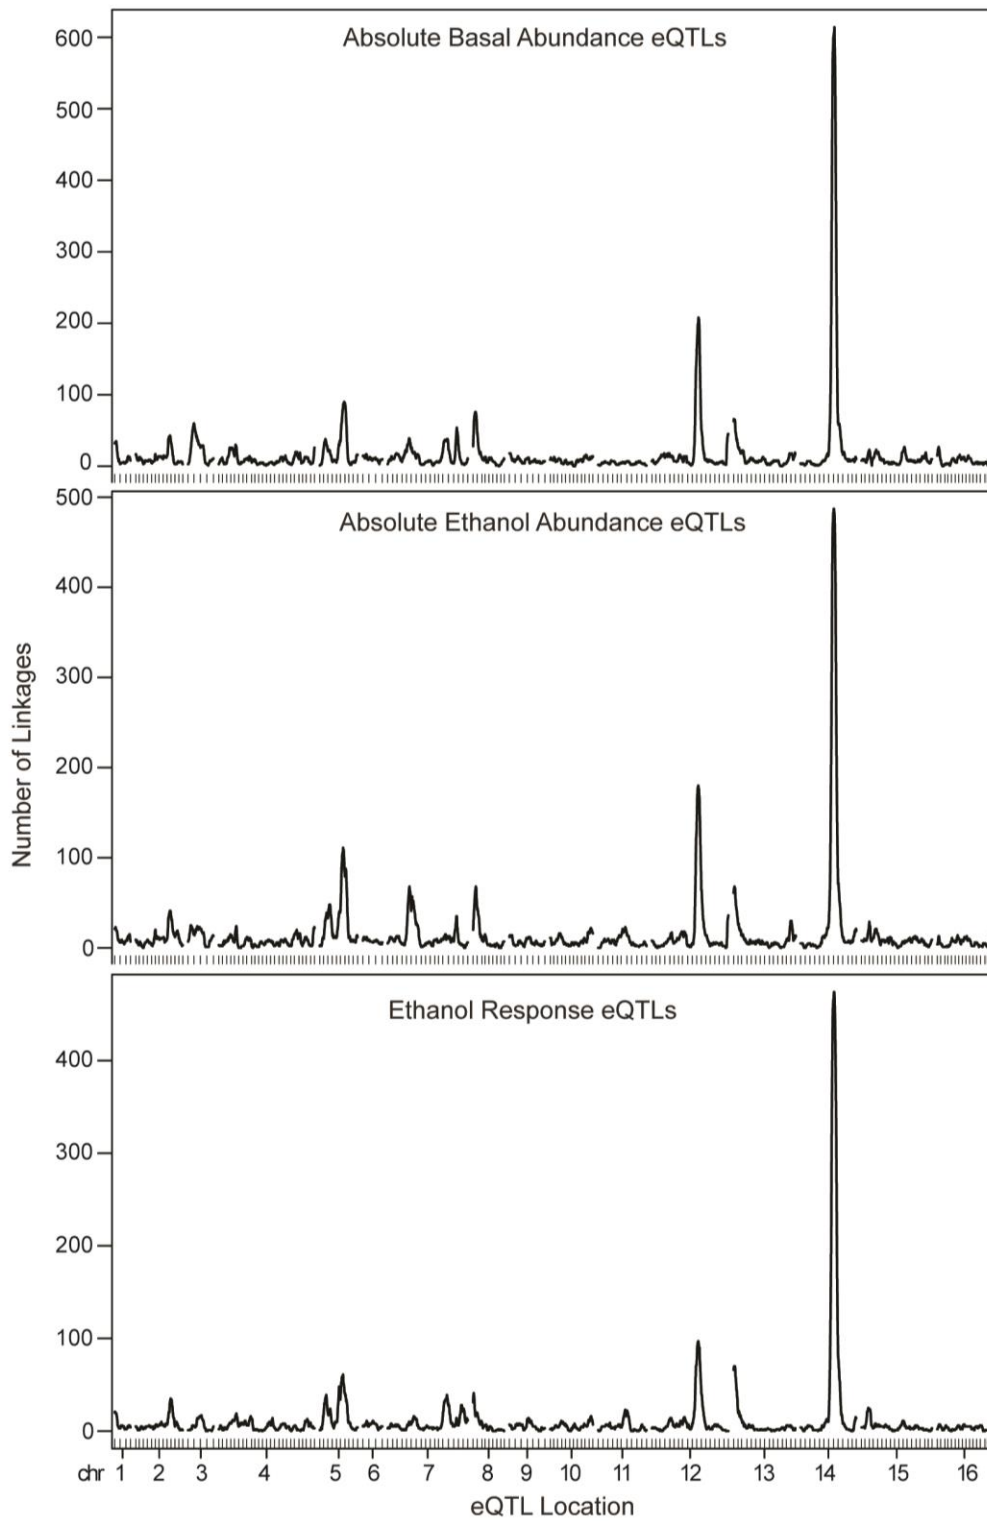

**Figure S2** Hotspot linkage association for the combined crosses across mapping regimes. The average number of transcripts (using a sliding 5cM window) mapping to each locus across the sixteen yeast chromosomes (x-axis) is plotted for each of the three mapping regimes.
