# Supplementary material for: Genetic Architecture of Ethanol-Responsive Transcriptome Variation in Saccharomyces cerevisiae Strains
Source: Oxford University Press journal article supplement (doi:10.1534/genetics.114.167429), 2014-06-26
Supplement: genetics.114.167429-14.pdf [file genetics.114.167429-14.pdf]

**Table S2 eQTL mapping summary for S288c x YPS163 cross**

|                                 | Total<br>Transcripts<br>Mapped | Number (and %)<br>mapping to 1<br>locus | Number (and %)<br>mapping to 2<br>loci | Number (and %)<br>mapping to 3 or<br>more loci |
|---------------------------------|--------------------------------|-----------------------------------------|----------------------------------------|------------------------------------------------|
| Basal Abundance<br>Mapping      | 2314                           | 1928 (83%)                              | 313 (14%)                              | 73 (3%)                                        |
| Ethanol<br>Abundance<br>Mapping | 2260                           | 1875 (83%)                              | 321 (14%)                              | 64 (3%)                                        |
| Ethanol Response<br>Mapping     | 1631                           | 1432 (88%)                              | 188 (12%)                              | 11 (1%)                                        |
| One or more<br>mapping regime   | 3764                           |                                         |                                        |                                                |
