# Supplementary material for: Genetic Architecture of Ethanol-Responsive Transcriptome Variation in Saccharomyces cerevisiae Strains
Source: Oxford University Press journal article supplement (doi:10.1534/genetics.114.167429), 2014-06-26
Supplement: genetics.114.167429-15.pdf [file genetics.114.167429-15.pdf]

**Table S1 eQTL mapping summary for S288c x M22 cross**

|                                 | Total<br>Transcripts<br>Mapped | Number (and %)<br>mapping to 1<br>locus | Number (and %)<br>mapping to 2<br>loci | Number (and %)<br>mapping to 3 or<br>more loci |
|---------------------------------|--------------------------------|-----------------------------------------|----------------------------------------|------------------------------------------------|
| Basal Abundance<br>Mapping      | 1480                           | 1370 (93%)                              | 100 (7%)                               | 10 (1%)                                        |
| Ethanol<br>Abundance<br>Mapping | 1349                           | 1230 (91%)                              | 111 (8%)                               | 8 (1%)                                         |
| Ethanol Response<br>Mapping     | 1127                           | 1048 (93%)                              | 76 (7%)                                | 3 (0%)                                         |
| One or more<br>mapping regime   | 2664                           |                                         |                                        |                                                |
