# Supplementary material for: Genetic Architecture of Ethanol-Responsive Transcriptome Variation in Saccharomyces cerevisiae Strains
Source: Oxford University Press journal article supplement (doi:10.1534/genetics.114.167429), 2014-06-26
Supplement: genetics.114.167429-16.pdf [file genetics.114.167429-16.pdf]

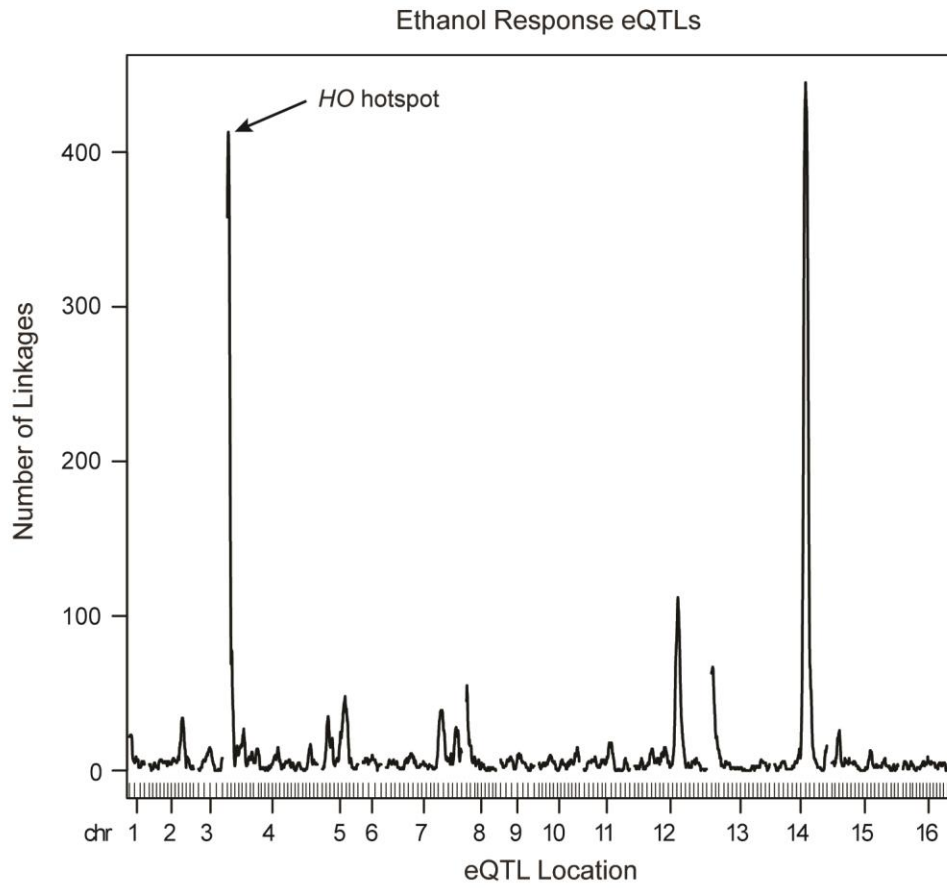

**Figure S1** Ploidy affects hundreds of ethanol-responsive transcripts. The number of linkages falling within a sliding 5 cM window is plotted across the genome. The large hotspot on chromosome II coincides with the *HO* locus.
