# Supplementary material for: Genetic Architecture of Ethanol-Responsive Transcriptome Variation in Saccharomyces cerevisiae Strains
Source: Oxford University Press journal article supplement (doi:10.1534/genetics.114.167429), 2014-06-26
Supplement: genetics.114.167429-17.pdf [file genetics.114.167429-17.pdf]

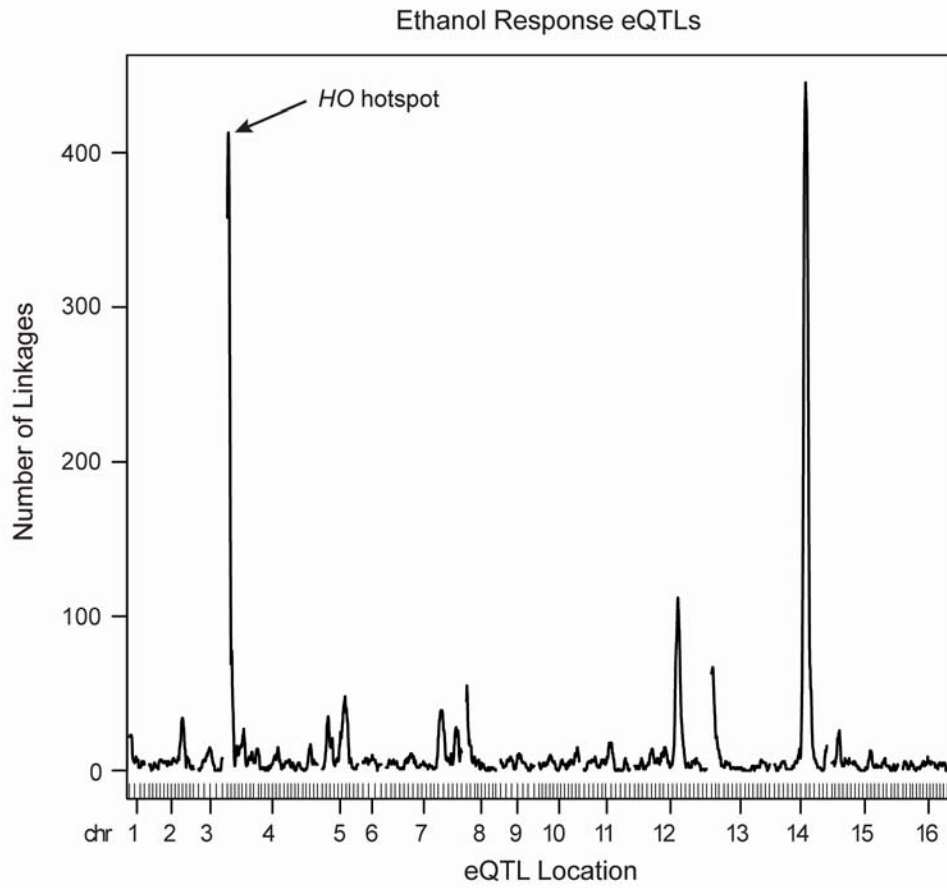

**Figure S1** Ploidy affects hundreds of ethanol-responsive transcripts. The number of linkages falling within a sliding 5 cM window is plotted across the genome. The large hotspot on chromosome II coincides with the *HO* locus.

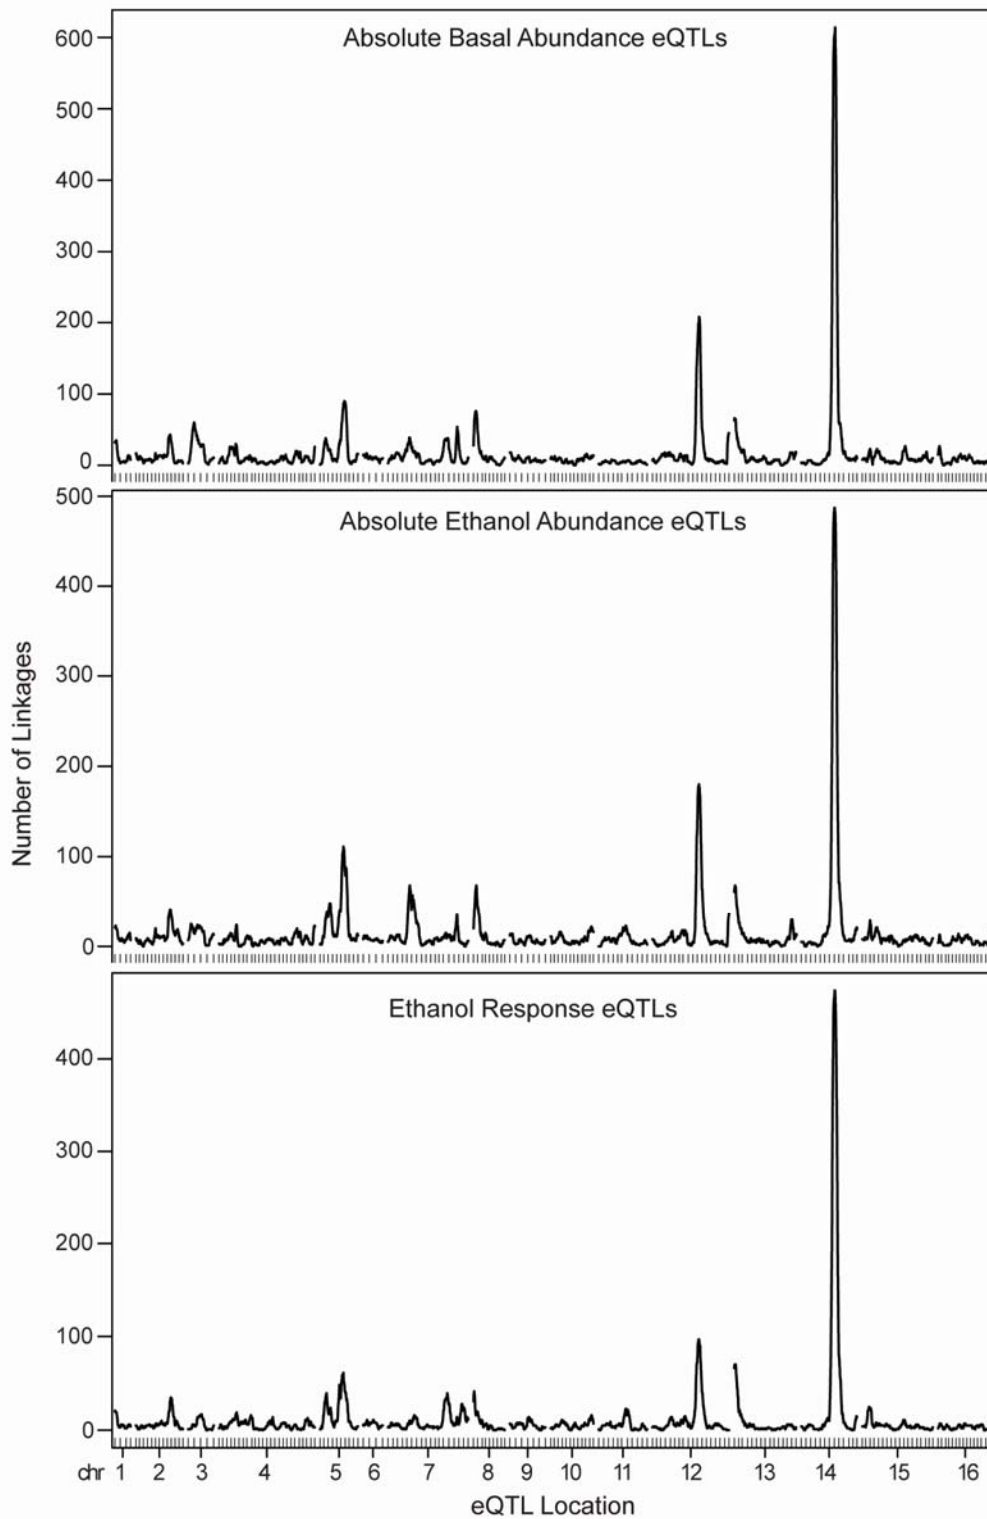

**Figure S2** Hotspot linkage association for the combined crosses across mapping regimes. The average number of transcripts (using a sliding 5cM window) mapping to each locus across the sixteen yeast chromosomes (x-axis) is plotted for each of the three mapping regimes.

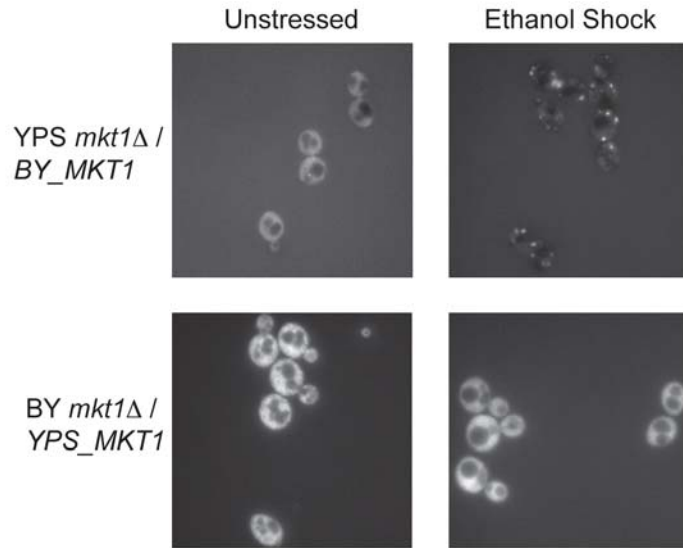

**Figure S3** Reciprocal Hemizyosity analysis of Mkt1p-GFP localization. Localization of Mkt1p-GFP was observed via fluorescent microscopy before and after 30 min treatment with 5% ethanol.

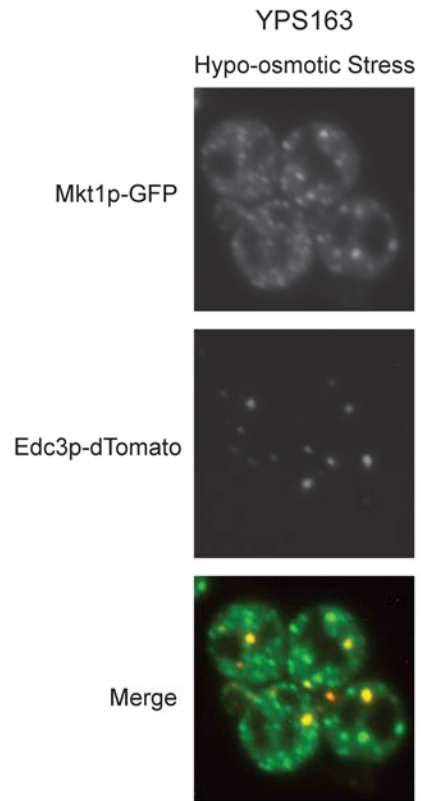

**Figure S4** YPS\_Mkt1p-GFP co-localizes to P-bodies during hypo-osmotic stress. Localization of Mkt1p-GFP and Edc3p-dTomato was observed via fluorescence microscopy following resuspension of cells in water for 30 min.

## Files S1-S10

Available for download as Excel files at <http://www.genetics.org/lookup/suppl/doi:10.1534/genetics.114.167429/-/DC1>

- File S1** Strains Used in this Study
- File S2** Normalized Microarray Data for Basal Transcript Abundance
- File S3** Normalized Microarray Data for Ethanol Transcript Abundance
- File S4** Normalized Microarray Data for Ethanol Response
- File S5** Limma Output for Analysis of Parental Microarray Data
- File S6** List of All Significant Linkages
- File S7** Functional Enrichments for Parental Gene Expression Clusters
- File S8** eQTL Hotspot Coordinates and Enrichments
- File S9** Epi-Hotspot Coordinates and Enrichments
- File S10** Regulator Enrichments for MKT1 Hotspot Traits

**Table S1 eQTL mapping summary for S288c x M22 cross**

|                                 | Total<br>Transcripts<br>Mapped | Number (and %)<br>mapping to 1<br>locus | Number (and %)<br>mapping to 2<br>loci | Number (and %)<br>mapping to 3 or<br>more loci |
|---------------------------------|--------------------------------|-----------------------------------------|----------------------------------------|------------------------------------------------|
| Basal Abundance<br>Mapping      | 1480                           | 1370 (93%)                              | 100 (7%)                               | 10 (1%)                                        |
| Ethanol<br>Abundance<br>Mapping | 1349                           | 1230 (91%)                              | 111 (8%)                               | 8 (1%)                                         |
| Ethanol Response<br>Mapping     | 1127                           | 1048 (93%)                              | 76 (7%)                                | 3 (0%)                                         |
| One or more<br>mapping regime   | 2664                           |                                         |                                        |                                                |

**Table S2 eQTL mapping summary for S288c x YPS163 cross**

|                                 | Total<br>Transcripts<br>Mapped | Number (and %)<br>mapping to 1<br>locus | Number (and %)<br>mapping to 2<br>loci | Number (and %)<br>mapping to 3 or<br>more loci |
|---------------------------------|--------------------------------|-----------------------------------------|----------------------------------------|------------------------------------------------|
| Basal Abundance<br>Mapping      | 2314                           | 1928 (83%)                              | 313 (14%)                              | 73 (3%)                                        |
| Ethanol<br>Abundance<br>Mapping | 2260                           | 1875 (83%)                              | 321 (14%)                              | 64 (3%)                                        |
| Ethanol Response<br>Mapping     | 1631                           | 1432 (88%)                              | 188 (12%)                              | 11 (1%)                                        |
| One or more<br>mapping regime   | 3764                           |                                         |                                        |                                                |
